# Supplementary material for: Genome-resolved biogeography of Phaeocystales, cosmopolitan bloom-forming algae
Source: Research Square preprint supplement (doi:10.21203/rs.3.rs-4339559/v1), 2024-06-11
Supplement: Supplementary file 1 [file 02968d84fb51411fd44dbcdc.xlsx]

## Sheet: Supplementary Table S10_light
Supplementary Table S10: Statistically up- and down-regulated functions according to ASC posterior probability associated with dark-light transition. Columns B-D mark the direction of the change, log-e relative expression, and posterior probability, respectively. Columns E, G, H list BRITE hierarchy, symbol and description for every significantly changed KEGG ortholog (column F).
Condition	UP/DOWN	ExpressionDelta	Post-p	BRITE	KEGG Ortholog	Symbol	Description
dark-hl	UPREGULATED	-2.765	1	09100 Metabolism;09101 Carbohydrate metabolism;00010 Glycolysis / Gluconeogenesis;K00128	K00128	ALDH	aldehyde dehydrogenase (NAD+) [EC:1.2.1.3]
dark-hl	UPREGULATED	-3.83	1	09100 Metabolism;09101 Carbohydrate metabolism;00010 Glycolysis / Gluconeogenesis;K00134	K00134	GAPDH,	glyceraldehyde 3-phosphate dehydrogenase (phosphorylating) [EC:1.2.1.12]
dark-hl	UPREGULATED	-2.776	1	09100 Metabolism;09101 Carbohydrate metabolism;00010 Glycolysis / Gluconeogenesis;K00161	K00161	PDHA,	pyruvate dehydrogenase E1 component subunit alpha [EC:1.2.4.1]
dark-hl	UPREGULATED	-3.162	1	09100 Metabolism;09101 Carbohydrate metabolism;00010 Glycolysis / Gluconeogenesis;K00162	K00162	PDHB,	pyruvate dehydrogenase E1 component subunit beta [EC:1.2.4.1]
dark-hl	UPREGULATED	-2.625	1	09100 Metabolism;09101 Carbohydrate metabolism;00010 Glycolysis / Gluconeogenesis;K00382	K00382	DLD,	dihydrolipoyl dehydrogenase [EC:1.8.1.4]
dark-hl	UPREGULATED	-1.84	0.987	09100 Metabolism;09101 Carbohydrate metabolism;00010 Glycolysis / Gluconeogenesis;K00627	K00627	DLAT,	pyruvate dehydrogenase E2 component (dihydrolipoyllysine-residue acetyltransferase) [EC:2.3.1.12]
dark-hl	UPREGULATED	-2.635	1	09100 Metabolism;09101 Carbohydrate metabolism;00010 Glycolysis / Gluconeogenesis;K00895	K00895	pfp,	diphosphate-dependent phosphofructokinase [EC:2.7.1.90]
dark-hl	UPREGULATED	-4.761	1	09100 Metabolism;09101 Carbohydrate metabolism;00010 Glycolysis / Gluconeogenesis;K00927	K00927	PGK,	phosphoglycerate kinase [EC:2.7.2.3]
dark-hl	UPREGULATED	-1.752	0.995	09100 Metabolism;09101 Carbohydrate metabolism;00010 Glycolysis / Gluconeogenesis;K01623	K01623	ALDO	fructose-bisphosphate aldolase, class I [EC:4.1.2.13]
dark-hl	UPREGULATED	-2.776	1	09100 Metabolism;09101 Carbohydrate metabolism;00010 Glycolysis / Gluconeogenesis;K01624	K01624	FBA,	fructose-bisphosphate aldolase, class II [EC:4.1.2.13]
dark-hl	UPREGULATED	-1.463	0.99	09100 Metabolism;09101 Carbohydrate metabolism;00010 Glycolysis / Gluconeogenesis;K01792	K01792	E5.1.3.15	glucose-6-phosphate 1-epimerase [EC:5.1.3.15]
dark-hl	UPREGULATED	-4.766	1	09100 Metabolism;09101 Carbohydrate metabolism;00010 Glycolysis / Gluconeogenesis;K01803	K01803	TPI,	triosephosphate isomerase (TIM) [EC:5.3.1.1]
dark-hl	UPREGULATED	-5.034	1	09100 Metabolism;09101 Carbohydrate metabolism;00010 Glycolysis / Gluconeogenesis;K01810	K01810	GPI,	glucose-6-phosphate isomerase [EC:5.3.1.9]
dark-hl	UPREGULATED	-3.917	1	09100 Metabolism;09101 Carbohydrate metabolism;00010 Glycolysis / Gluconeogenesis;K01835	K01835	pgm	phosphoglucomutase [EC:5.4.2.2]
dark-hl	UPREGULATED	-1.978	1	09100 Metabolism;09101 Carbohydrate metabolism;00010 Glycolysis / Gluconeogenesis;K03841	K03841	FBP,	fructose-1,6-bisphosphatase I [EC:3.1.3.11]
dark-hl	UPREGULATED	-1.791	0.998	09100 Metabolism;09101 Carbohydrate metabolism;00020 Citrate cycle (TCA cycle);K00024	K00024	mdh	malate dehydrogenase [EC:1.1.1.37]
dark-hl	UPREGULATED	-2.757	1	09100 Metabolism;09101 Carbohydrate metabolism;00020 Citrate cycle (TCA cycle);K00026	K00026	MDH2	malate dehydrogenase [EC:1.1.1.37]
dark-hl	UPREGULATED	-2.776	1	09100 Metabolism;09101 Carbohydrate metabolism;00020 Citrate cycle (TCA cycle);K00161	K00161	PDHA,	pyruvate dehydrogenase E1 component subunit alpha [EC:1.2.4.1]
dark-hl	UPREGULATED	-3.162	1	09100 Metabolism;09101 Carbohydrate metabolism;00020 Citrate cycle (TCA cycle);K00162	K00162	PDHB,	pyruvate dehydrogenase E1 component subunit beta [EC:1.2.4.1]
dark-hl	UPREGULATED	-2.625	1	09100 Metabolism;09101 Carbohydrate metabolism;00020 Citrate cycle (TCA cycle);K00382	K00382	DLD,	dihydrolipoyl dehydrogenase [EC:1.8.1.4]
dark-hl	UPREGULATED	-1.84	0.987	09100 Metabolism;09101 Carbohydrate metabolism;00020 Citrate cycle (TCA cycle);K00627	K00627	DLAT,	pyruvate dehydrogenase E2 component (dihydrolipoyllysine-residue acetyltransferase) [EC:2.3.1.12]
dark-hl	UPREGULATED	-1.93	0.987	09100 Metabolism;09101 Carbohydrate metabolism;00020 Citrate cycle (TCA cycle);K01899	K01899	LSC1	succinyl-CoA synthetase alpha subunit [EC:6.2.1.4 6.2.1.5]
dark-hl	UPREGULATED	-1.875	1	09100 Metabolism;09101 Carbohydrate metabolism;00020 Citrate cycle (TCA cycle);K01958	K01958	PC,	pyruvate carboxylase [EC:6.4.1.1]
dark-hl	UPREGULATED	-1.459	0.995	09100 Metabolism;09101 Carbohydrate metabolism;00030 Pentose phosphate pathway;K00033	K00033	PGD,	6-phosphogluconate dehydrogenase [EC:1.1.1.44 1.1.1.343]
dark-hl	UPREGULATED	-2.839	1	09100 Metabolism;09101 Carbohydrate metabolism;00030 Pentose phosphate pathway;K00615	K00615	E2.2.1.1,	transketolase [EC:2.2.1.1]
dark-hl	UPREGULATED	-2.635	1	09100 Metabolism;09101 Carbohydrate metabolism;00030 Pentose phosphate pathway;K00895	K00895	pfp,	diphosphate-dependent phosphofructokinase [EC:2.7.1.90]
dark-hl	UPREGULATED	-2.461	1	09100 Metabolism;09101 Carbohydrate metabolism;00030 Pentose phosphate pathway;K01057	K01057	PGLS,	6-phosphogluconolactonase [EC:3.1.1.31]
dark-hl	UPREGULATED	-1.752	0.995	09100 Metabolism;09101 Carbohydrate metabolism;00030 Pentose phosphate pathway;K01623	K01623	ALDO	fructose-bisphosphate aldolase, class I [EC:4.1.2.13]
dark-hl	UPREGULATED	-2.776	1	09100 Metabolism;09101 Carbohydrate metabolism;00030 Pentose phosphate pathway;K01624	K01624	FBA,	fructose-bisphosphate aldolase, class II [EC:4.1.2.13]
dark-hl	UPREGULATED	-1.446	1	09100 Metabolism;09101 Carbohydrate metabolism;00030 Pentose phosphate pathway;K01783	K01783	rpe,	ribulose-phosphate 3-epimerase [EC:5.1.3.1]
dark-hl	UPREGULATED	-2.009	1	09100 Metabolism;09101 Carbohydrate metabolism;00030 Pentose phosphate pathway;K01807	K01807	rpiA	ribose 5-phosphate isomerase A [EC:5.3.1.6]
dark-hl	UPREGULATED	-5.034	1	09100 Metabolism;09101 Carbohydrate metabolism;00030 Pentose phosphate pathway;K01810	K01810	GPI,	glucose-6-phosphate isomerase [EC:5.3.1.9]
dark-hl	UPREGULATED	-3.917	1	09100 Metabolism;09101 Carbohydrate metabolism;00030 Pentose phosphate pathway;K01835	K01835	pgm	phosphoglucomutase [EC:5.4.2.2]
dark-hl	UPREGULATED	-1.978	1	09100 Metabolism;09101 Carbohydrate metabolism;00030 Pentose phosphate pathway;K03841	K03841	FBP,	fructose-1,6-bisphosphatase I [EC:3.1.3.11]
dark-hl	UPREGULATED	-3.105	1	09100 Metabolism;09101 Carbohydrate metabolism;00040 Pentose and glucuronate interconversions;K00963	K00963	UGP2,	UTP--glucose-1-phosphate uridylyltransferase [EC:2.7.7.9]
dark-hl	UPREGULATED	-1.446	1	09100 Metabolism;09101 Carbohydrate metabolism;00040 Pentose and glucuronate interconversions;K01783	K01783	rpe,	ribulose-phosphate 3-epimerase [EC:5.1.3.1]
dark-hl	UPREGULATED	-2.297	0.999	09100 Metabolism;09101 Carbohydrate metabolism;00040 Pentose and glucuronate interconversions;K12447	K12447	USP	UDP-sugar pyrophosphorylase [EC:2.7.7.64]
dark-hl	UPREGULATED	-2.635	1	09100 Metabolism;09101 Carbohydrate metabolism;00051 Fructose and mannose metabolism;K00895	K00895	pfp,	diphosphate-dependent phosphofructokinase [EC:2.7.1.90]
dark-hl	UPREGULATED	-2.474	0.999	09100 Metabolism;09101 Carbohydrate metabolism;00051 Fructose and mannose metabolism;K01103	K01103	PFKFB3	6-phosphofructo-2-kinase / fructose-2,6-biphosphatase 3 [EC:2.7.1.105 3.1.3.46]
dark-hl	UPREGULATED	-1.752	0.995	09100 Metabolism;09101 Carbohydrate metabolism;00051 Fructose and mannose metabolism;K01623	K01623	ALDO	fructose-bisphosphate aldolase, class I [EC:4.1.2.13]
dark-hl	UPREGULATED	-2.776	1	09100 Metabolism;09101 Carbohydrate metabolism;00051 Fructose and mannose metabolism;K01624	K01624	FBA,	fructose-bisphosphate aldolase, class II [EC:4.1.2.13]
dark-hl	UPREGULATED	-2.017	0.99	09100 Metabolism;09101 Carbohydrate metabolism;00051 Fructose and mannose metabolism;K01711	K01711	gmd,	GDPmannose 4,6-dehydratase [EC:4.2.1.47]
dark-hl	UPREGULATED	-4.766	1	09100 Metabolism;09101 Carbohydrate metabolism;00051 Fructose and mannose metabolism;K01803	K01803	TPI,	triosephosphate isomerase (TIM) [EC:5.3.1.1]
dark-hl	UPREGULATED	-1.51	0.99	09100 Metabolism;09101 Carbohydrate metabolism;00051 Fructose and mannose metabolism;K02377	K02377	TSTA3,	GDP-L-fucose synthase [EC:1.1.1.271]
dark-hl	UPREGULATED	-1.978	1	09100 Metabolism;09101 Carbohydrate metabolism;00051 Fructose and mannose metabolism;K03841	K03841	FBP,	fructose-1,6-bisphosphatase I [EC:3.1.3.11]
dark-hl	UPREGULATED	-3.105	1	09100 Metabolism;09101 Carbohydrate metabolism;00052 Galactose metabolism;K00963	K00963	UGP2,	UTP--glucose-1-phosphate uridylyltransferase [EC:2.7.7.9]
dark-hl	UPREGULATED	-1.66	0.979	09100 Metabolism;09101 Carbohydrate metabolism;00052 Galactose metabolism;K00965	K00965	galT,	UDPglucose--hexose-1-phosphate uridylyltransferase [EC:2.7.7.12]
dark-hl	UPREGULATED	-3.917	1	09100 Metabolism;09101 Carbohydrate metabolism;00052 Galactose metabolism;K01835	K01835	pgm	phosphoglucomutase [EC:5.4.2.2]
dark-hl	UPREGULATED	-2.297	0.999	09100 Metabolism;09101 Carbohydrate metabolism;00052 Galactose metabolism;K12447	K12447	USP	UDP-sugar pyrophosphorylase [EC:2.7.7.64]
dark-hl	UPREGULATED	-2.765	1	09100 Metabolism;09101 Carbohydrate metabolism;00053 Ascorbate and aldarate metabolism;K00128	K00128	ALDH	aldehyde dehydrogenase (NAD+) [EC:1.2.1.3]
dark-hl	UPREGULATED	-2.101	1	09100 Metabolism;09101 Carbohydrate metabolism;00053 Ascorbate and aldarate metabolism;K08679	K08679	GAE,	UDP-glucuronate 4-epimerase [EC:5.1.3.6]
dark-hl	UPREGULATED	-2.078	1	09100 Metabolism;09101 Carbohydrate metabolism;00053 Ascorbate and aldarate metabolism;K10046	K10046	GME	GDP-D-mannose 3', 5'-epimerase [EC:5.1.3.18 5.1.3.-]
dark-hl	UPREGULATED	-2.811	1	09100 Metabolism;09101 Carbohydrate metabolism;00053 Ascorbate and aldarate metabolism;K10047	K10047	VTC4	inositol-phosphate phosphatase / L-galactose 1-phosphate phosphatase [EC:3.1.3.25 3.1.3.93]
dark-hl	UPREGULATED	-2.297	0.999	09100 Metabolism;09101 Carbohydrate metabolism;00053 Ascorbate and aldarate metabolism;K12447	K12447	USP	UDP-sugar pyrophosphorylase [EC:2.7.7.64]
dark-hl	UPREGULATED	-1.838	0.979	09100 Metabolism;09101 Carbohydrate metabolism;00500 Starch and sucrose metabolism;K00700	K00700	GBE1,	1,4-alpha-glucan branching enzyme [EC:2.4.1.18]
dark-hl	UPREGULATED	-3.105	1	09100 Metabolism;09101 Carbohydrate metabolism;00500 Starch and sucrose metabolism;K00963	K00963	UGP2,	UTP--glucose-1-phosphate uridylyltransferase [EC:2.7.7.9]
dark-hl	UPREGULATED	-1.69	0.97	09100 Metabolism;09101 Carbohydrate metabolism;00500 Starch and sucrose metabolism;K01194	K01194	TREH,	alpha,alpha-trehalase [EC:3.2.1.28]
dark-hl	UPREGULATED	-5.034	1	09100 Metabolism;09101 Carbohydrate metabolism;00500 Starch and sucrose metabolism;K01810	K01810	GPI,	glucose-6-phosphate isomerase [EC:5.3.1.9]
dark-hl	UPREGULATED	-3.917	1	09100 Metabolism;09101 Carbohydrate metabolism;00500 Starch and sucrose metabolism;K01835	K01835	pgm	phosphoglucomutase [EC:5.4.2.2]
dark-hl	UPREGULATED	-1.739	0.969	09100 Metabolism;09101 Carbohydrate metabolism;00500 Starch and sucrose metabolism;K05350	K05350	bglB	beta-glucosidase [EC:3.2.1.21]
dark-hl	UPREGULATED	-1.952	1	09100 Metabolism;09101 Carbohydrate metabolism;00520 Amino sugar and nucleotide sugar metabolism;K00326	K00326	CYB5R	cytochrome-b5 reductase [EC:1.6.2.2]
dark-hl	UPREGULATED	-2.499	1	09100 Metabolism;09101 Carbohydrate metabolism;00520 Amino sugar and nucleotide sugar metabolism;K00820	K00820	glmS,	glutamine---fructose-6-phosphate transaminase (isomerizing) [EC:2.6.1.16]
dark-hl	UPREGULATED	-3.105	1	09100 Metabolism;09101 Carbohydrate metabolism;00520 Amino sugar and nucleotide sugar metabolism;K00963	K00963	UGP2,	UTP--glucose-1-phosphate uridylyltransferase [EC:2.7.7.9]
dark-hl	UPREGULATED	-1.66	0.979	09100 Metabolism;09101 Carbohydrate metabolism;00520 Amino sugar and nucleotide sugar metabolism;K00965	K00965	galT,	UDPglucose--hexose-1-phosphate uridylyltransferase [EC:2.7.7.12]
dark-hl	UPREGULATED	-2.297	0.999	09100 Metabolism;09101 Carbohydrate metabolism;00520 Amino sugar and nucleotide sugar metabolism;K00972	K00972	UAP1	UDP-N-acetylglucosamine/UDP-N-acetylgalactosamine diphosphorylase [EC:2.7.7.23 2.7.7.83]
dark-hl	UPREGULATED	-1.859	1	09100 Metabolism;09101 Carbohydrate metabolism;00520 Amino sugar and nucleotide sugar metabolism;K01183	K01183	E3.2.1.14	chitinase [EC:3.2.1.14]
dark-hl	UPREGULATED	-4.294	1	09100 Metabolism;09101 Carbohydrate metabolism;00520 Amino sugar and nucleotide sugar metabolism;K01209	K01209	abfA	alpha-L-arabinofuranosidase [EC:3.2.1.55]
dark-hl	UPREGULATED	-2.017	0.99	09100 Metabolism;09101 Carbohydrate metabolism;00520 Amino sugar and nucleotide sugar metabolism;K01711	K01711	gmd,	GDPmannose 4,6-dehydratase [EC:4.2.1.47]
dark-hl	UPREGULATED	-5.034	1	09100 Metabolism;09101 Carbohydrate metabolism;00520 Amino sugar and nucleotide sugar metabolism;K01810	K01810	GPI,	glucose-6-phosphate isomerase [EC:5.3.1.9]
dark-hl	UPREGULATED	-3.917	1	09100 Metabolism;09101 Carbohydrate metabolism;00520 Amino sugar and nucleotide sugar metabolism;K01835	K01835	pgm	phosphoglucomutase [EC:5.4.2.2]
dark-hl	UPREGULATED	-2.025	1	09100 Metabolism;09101 Carbohydrate metabolism;00520 Amino sugar and nucleotide sugar metabolism;K01836	K01836	PGM3	phosphoacetylglucosamine mutase [EC:5.4.2.3]
dark-hl	UPREGULATED	-1.51	0.99	09100 Metabolism;09101 Carbohydrate metabolism;00520 Amino sugar and nucleotide sugar metabolism;K02377	K02377	TSTA3,	GDP-L-fucose synthase [EC:1.1.1.271]
dark-hl	UPREGULATED	-3.249	1	09100 Metabolism;09101 Carbohydrate metabolism;00520 Amino sugar and nucleotide sugar metabolism;K05304	K05304	NANS,	sialic acid synthase [EC:2.5.1.56 2.5.1.57 2.5.1.132]
dark-hl	UPREGULATED	-2.101	1	09100 Metabolism;09101 Carbohydrate metabolism;00520 Amino sugar and nucleotide sugar metabolism;K08679	K08679	GAE,	UDP-glucuronate 4-epimerase [EC:5.1.3.6]
dark-hl	UPREGULATED	-2.078	1	09100 Metabolism;09101 Carbohydrate metabolism;00520 Amino sugar and nucleotide sugar metabolism;K10046	K10046	GME	GDP-D-mannose 3', 5'-epimerase [EC:5.1.3.18 5.1.3.-]
dark-hl	UPREGULATED	-2.297	0.999	09100 Metabolism;09101 Carbohydrate metabolism;00520 Amino sugar and nucleotide sugar metabolism;K12447	K12447	USP	UDP-sugar pyrophosphorylase [EC:2.7.7.64]
dark-hl	UPREGULATED	-2.963	1	09100 Metabolism;09101 Carbohydrate metabolism;00520 Amino sugar and nucleotide sugar metabolism;K13379	K13379	RGP,	reversibly glycosylated polypeptide / UDP-arabinopyranose mutase [EC:2.4.1.- 5.4.99.30]
dark-hl	UPREGULATED	-1.827	0.987	09100 Metabolism;09101 Carbohydrate metabolism;00520 Amino sugar and nucleotide sugar metabolism;K13648	K13648	GAUT	alpha-1,4-galacturonosyltransferase [EC:2.4.1.43]
dark-hl	UPREGULATED	-3.685	1	09100 Metabolism;09101 Carbohydrate metabolism;00562 Inositol phosphate metabolism;K00889	K00889	PIP5K	1-phosphatidylinositol-4-phosphate 5-kinase [EC:2.7.1.68]
dark-hl	UPREGULATED	-2.811	1	09100 Metabolism;09101 Carbohydrate metabolism;00562 Inositol phosphate metabolism;K01092	K01092	E3.1.3.25,	myo-inositol-1(or 4)-monophosphatase [EC:3.1.3.25]
dark-hl	UPREGULATED	-4.766	1	09100 Metabolism;09101 Carbohydrate metabolism;00562 Inositol phosphate metabolism;K01803	K01803	TPI,	triosephosphate isomerase (TIM) [EC:5.3.1.1]
dark-hl	UPREGULATED	-2.871	1	09100 Metabolism;09101 Carbohydrate metabolism;00562 Inositol phosphate metabolism;K01858	K01858	INO1,	myo-inositol-1-phosphate synthase [EC:5.5.1.4]
dark-hl	UPREGULATED	-2.811	1	09100 Metabolism;09101 Carbohydrate metabolism;00562 Inositol phosphate metabolism;K10047	K10047	VTC4	inositol-phosphate phosphatase / L-galactose 1-phosphate phosphatase [EC:3.1.3.25 3.1.3.93]
dark-hl	UPREGULATED	-2.432	0.999	09100 Metabolism;09101 Carbohydrate metabolism;00562 Inositol phosphate metabolism;K20279	K20279	SYNJ	synaptojanin [EC:3.1.3.36]
dark-hl	UPREGULATED	-1.791	0.998	09100 Metabolism;09101 Carbohydrate metabolism;00620 Pyruvate metabolism;K00024	K00024	mdh	malate dehydrogenase [EC:1.1.1.37]
dark-hl	UPREGULATED	-2.757	1	09100 Metabolism;09101 Carbohydrate metabolism;00620 Pyruvate metabolism;K00026	K00026	MDH2	malate dehydrogenase [EC:1.1.1.37]
dark-hl	UPREGULATED	-2.765	1	09100 Metabolism;09101 Carbohydrate metabolism;00620 Pyruvate metabolism;K00128	K00128	ALDH	aldehyde dehydrogenase (NAD+) [EC:1.2.1.3]
dark-hl	UPREGULATED	-2.776	1	09100 Metabolism;09101 Carbohydrate metabolism;00620 Pyruvate metabolism;K00161	K00161	PDHA,	pyruvate dehydrogenase E1 component subunit alpha [EC:1.2.4.1]
dark-hl	UPREGULATED	-3.162	1	09100 Metabolism;09101 Carbohydrate metabolism;00620 Pyruvate metabolism;K00162	K00162	PDHB,	pyruvate dehydrogenase E1 component subunit beta [EC:1.2.4.1]
dark-hl	UPREGULATED	-2.625	1	09100 Metabolism;09101 Carbohydrate metabolism;00620 Pyruvate metabolism;K00382	K00382	DLD,	dihydrolipoyl dehydrogenase [EC:1.8.1.4]
dark-hl	UPREGULATED	-1.84	0.987	09100 Metabolism;09101 Carbohydrate metabolism;00620 Pyruvate metabolism;K00627	K00627	DLAT,	pyruvate dehydrogenase E2 component (dihydrolipoyllysine-residue acetyltransferase) [EC:2.3.1.12]
dark-hl	UPREGULATED	-1.636	0.953	09100 Metabolism;09101 Carbohydrate metabolism;00620 Pyruvate metabolism;K01759	K01759	GLO1,	lactoylglutathione lyase [EC:4.4.1.5]
dark-hl	UPREGULATED	-1.875	1	09100 Metabolism;09101 Carbohydrate metabolism;00620 Pyruvate metabolism;K01958	K01958	PC,	pyruvate carboxylase [EC:6.4.1.1]
dark-hl	UPREGULATED	-2.393	1	09100 Metabolism;09101 Carbohydrate metabolism;00620 Pyruvate metabolism;K11262	K11262	ACACA	acetyl-CoA carboxylase / biotin carboxylase 1 [EC:6.4.1.2 6.3.4.14 2.1.3.15]
dark-hl	UPREGULATED	-2.321	1	09100 Metabolism;09101 Carbohydrate metabolism;00620 Pyruvate metabolism;K18930	K18930	dld	D-lactate dehydrogenase
dark-hl	UPREGULATED	-1.791	0.998	09100 Metabolism;09101 Carbohydrate metabolism;00630 Glyoxylate and dicarboxylate metabolism;K00024	K00024	mdh	malate dehydrogenase [EC:1.1.1.37]
dark-hl	UPREGULATED	-2.757	1	09100 Metabolism;09101 Carbohydrate metabolism;00630 Glyoxylate and dicarboxylate metabolism;K00026	K00026	MDH2	malate dehydrogenase [EC:1.1.1.37]
dark-hl	UPREGULATED	-2.24	1	09100 Metabolism;09101 Carbohydrate metabolism;00630 Glyoxylate and dicarboxylate metabolism;K00284	K00284	GLU,	glutamate synthase (ferredoxin) [EC:1.4.7.1]
dark-hl	UPREGULATED	-2.625	1	09100 Metabolism;09101 Carbohydrate metabolism;00630 Glyoxylate and dicarboxylate metabolism;K00382	K00382	DLD,	dihydrolipoyl dehydrogenase [EC:1.8.1.4]
dark-hl	UPREGULATED	-2.521	1	09100 Metabolism;09101 Carbohydrate metabolism;00630 Glyoxylate and dicarboxylate metabolism;K00600	K00600	glyA,	glycine hydroxymethyltransferase [EC:2.1.2.1]
dark-hl	UPREGULATED	-3.435	1	09100 Metabolism;09101 Carbohydrate metabolism;00630 Glyoxylate and dicarboxylate metabolism;K00605	K00605	gcvT,	glycine cleavage system T protein (aminomethyltransferase) [EC:2.1.2.10]
dark-hl	UPREGULATED	-1.005	0.963	09100 Metabolism;09101 Carbohydrate metabolism;00630 Glyoxylate and dicarboxylate metabolism;K22133	K22133	AAE3	oxalate---CoA ligase [EC:6.2.1.8]
dark-hl	UPREGULATED	-1.66	0.979	09100 Metabolism;09101 Carbohydrate metabolism;00640 Propanoate metabolism;K00167	K00167	BCKDHB,	2-oxoisovalerate dehydrogenase E1 component subunit beta [EC:1.2.4.4]
dark-hl	UPREGULATED	-2.625	1	09100 Metabolism;09101 Carbohydrate metabolism;00640 Propanoate metabolism;K00382	K00382	DLD,	dihydrolipoyl dehydrogenase [EC:1.8.1.4]
dark-hl	UPREGULATED	-1.93	0.987	09100 Metabolism;09101 Carbohydrate metabolism;00640 Propanoate metabolism;K01899	K01899	LSC1	succinyl-CoA synthetase alpha subunit [EC:6.2.1.4 6.2.1.5]
dark-hl	UPREGULATED	-2.393	1	09100 Metabolism;09101 Carbohydrate metabolism;00640 Propanoate metabolism;K11262	K11262	ACACA	acetyl-CoA carboxylase / biotin carboxylase 1 [EC:6.4.1.2 6.3.4.14 2.1.3.15]
dark-hl	UPREGULATED	-2.566	1	09100 Metabolism;09102 Energy metabolism;00190 Oxidative phosphorylation;K00417	K00417	QCR7,	ubiquinol-cytochrome c reductase subunit 7
dark-hl	UPREGULATED	-1.633	1	09100 Metabolism;09102 Energy metabolism;00190 Oxidative phosphorylation;K01507	K01507	ppa	inorganic pyrophosphatase [EC:3.6.1.1]
dark-hl	UPREGULATED	-2.957	1	09100 Metabolism;09102 Energy metabolism;00190 Oxidative phosphorylation;K02108	K02108	ATPF0A,	F-type H+-transporting ATPase subunit a
dark-hl	UPREGULATED	-2.791	1	09100 Metabolism;09102 Energy metabolism;00190 Oxidative phosphorylation;K02109	K02109	ATPF0B,	F-type H+-transporting ATPase subunit b
dark-hl	UPREGULATED	-2.292	0.997	09100 Metabolism;09102 Energy metabolism;00190 Oxidative phosphorylation;K02110	K02110	ATPF0C,	F-type H+-transporting ATPase subunit c
dark-hl	UPREGULATED	-1.896	1	09100 Metabolism;09102 Energy metabolism;00190 Oxidative phosphorylation;K02112	K02112	ATPF1B,	F-type H+/Na+-transporting ATPase subunit beta [EC:7.1.2.2 7.2.2.1]
dark-hl	UPREGULATED	-1.896	1	09100 Metabolism;09102 Energy metabolism;00190 Oxidative phosphorylation;K02114	K02114	ATPF1E,	F-type H+-transporting ATPase subunit epsilon
dark-hl	UPREGULATED	-1.702	1	09100 Metabolism;09102 Energy metabolism;00190 Oxidative phosphorylation;K02115	K02115	ATPF1G,	F-type H+-transporting ATPase subunit gamma
dark-hl	UPREGULATED	-1.896	1	09100 Metabolism;09102 Energy metabolism;00190 Oxidative phosphorylation;K02134	K02134	ATPeF1D,	F-type H+-transporting ATPase subunit delta
dark-hl	UPREGULATED	-2.155	0.999	09100 Metabolism;09102 Energy metabolism;00190 Oxidative phosphorylation;K02151	K02151	ATPeV1F,	V-type H+-transporting ATPase subunit F
dark-hl	UPREGULATED	-2.839	1	09100 Metabolism;09102 Energy metabolism;00190 Oxidative phosphorylation;K03885	K03885	ndh	NADH:quinone reductase (non-electrogenic) [EC:1.6.5.9]
dark-hl	UPREGULATED	-1.193	0.953	09100 Metabolism;09102 Energy metabolism;00190 Oxidative phosphorylation;K03935	K03935	NDUFS2	NADH dehydrogenase (ubiquinone) Fe-S protein 2 [EC:7.1.1.2]
dark-hl	UPREGULATED	-1.619	0.991	09100 Metabolism;09102 Energy metabolism;00190 Oxidative phosphorylation;K03936	K03936	NDUFS3	NADH dehydrogenase (ubiquinone) Fe-S protein 3 [EC:7.1.1.2]
dark-hl	UPREGULATED	-2.006	0.996	09100 Metabolism;09102 Energy metabolism;00190 Oxidative phosphorylation;K03941	K03941	NDUFS8	NADH dehydrogenase (ubiquinone) Fe-S protein 8 [EC:7.1.1.2]
dark-hl	UPREGULATED	-1.553	0.986	09100 Metabolism;09102 Energy metabolism;00190 Oxidative phosphorylation;K03952	K03952	NDUFA8	NADH dehydrogenase (ubiquinone) 1 alpha subcomplex subunit 8
dark-hl	UPREGULATED	-2.33	1	09100 Metabolism;09102 Energy metabolism;00190 Oxidative phosphorylation;K03955	K03955	NDUFAB1	NADH dehydrogenase (ubiquinone) 1 alpha/beta subcomplex 1, acyl-carrier protein
dark-hl	UPREGULATED	-2.726	1	09100 Metabolism;09102 Energy metabolism;00190 Oxidative phosphorylation;K08738	K08738	CYC	cytochrome c
dark-hl	UPREGULATED	-1.438	0.991	09100 Metabolism;09102 Energy metabolism;00190 Oxidative phosphorylation;K11352	K11352	NDUFA12	NADH dehydrogenase (ubiquinone) 1 alpha subcomplex subunit 12
dark-hl	UPREGULATED	-2.957	1	09100 Metabolism;09102 Energy metabolism;00195 Photosynthesis;K02108	K02108	ATPF0A,	F-type H+-transporting ATPase subunit a
dark-hl	UPREGULATED	-2.791	1	09100 Metabolism;09102 Energy metabolism;00195 Photosynthesis;K02109	K02109	ATPF0B,	F-type H+-transporting ATPase subunit b
dark-hl	UPREGULATED	-2.292	0.997	09100 Metabolism;09102 Energy metabolism;00195 Photosynthesis;K02110	K02110	ATPF0C,	F-type H+-transporting ATPase subunit c
dark-hl	UPREGULATED	-1.896	1	09100 Metabolism;09102 Energy metabolism;00195 Photosynthesis;K02112	K02112	ATPF1B,	F-type H+/Na+-transporting ATPase subunit beta [EC:7.1.2.2 7.2.2.1]
dark-hl	UPREGULATED	-1.896	1	09100 Metabolism;09102 Energy metabolism;00195 Photosynthesis;K02114	K02114	ATPF1E,	F-type H+-transporting ATPase subunit epsilon
dark-hl	UPREGULATED	-1.702	1	09100 Metabolism;09102 Energy metabolism;00195 Photosynthesis;K02115	K02115	ATPF1G,	F-type H+-transporting ATPase subunit gamma
dark-hl	UPREGULATED	-3.067	1	09100 Metabolism;09102 Energy metabolism;00195 Photosynthesis;K02636	K02636	petC	cytochrome b6-f complex iron-sulfur subunit [EC:7.1.1.6]
dark-hl	UPREGULATED	-4.258	1	09100 Metabolism;09102 Energy metabolism;00195 Photosynthesis;K02639	K02639	petF	ferredoxin
dark-hl	UPREGULATED	-3.12	1	09100 Metabolism;09102 Energy metabolism;00195 Photosynthesis;K02641	K02641	petH	ferredoxin--NADP+ reductase [EC:1.18.1.2]
dark-hl	UPREGULATED	-2.187	1	09100 Metabolism;09102 Energy metabolism;00195 Photosynthesis;K08903	K08903	psb28	photosystem II 13kDa protein
dark-hl	UPREGULATED	-3.749	1	09100 Metabolism;09102 Energy metabolism;00196 Photosynthesis - antenna proteins;K08907	K08907	LHCA1	light-harvesting complex I chlorophyll a/b binding protein 1
dark-hl	UPREGULATED	-1.974	1	09100 Metabolism;09102 Energy metabolism;00196 Photosynthesis - antenna proteins;K08908	K08908	LHCA2	light-harvesting complex I chlorophyll a/b binding protein 2
dark-hl	UPREGULATED	-2.893	1	09100 Metabolism;09102 Energy metabolism;00196 Photosynthesis - antenna proteins;K08914	K08914	LHCB3	light-harvesting complex II chlorophyll a/b binding protein 3
dark-hl	UPREGULATED	-3.749	1	09100 Metabolism;09102 Energy metabolism;00196 Photosynthesis - antenna proteins;K08916	K08916	LHCB5	light-harvesting complex II chlorophyll a/b binding protein 5
dark-hl	UPREGULATED	-3.749	1	09100 Metabolism;09102 Energy metabolism;00196 Photosynthesis - antenna proteins;K08917	K08917	LHCB6	light-harvesting complex II chlorophyll a/b binding protein 6
dark-hl	UPREGULATED	-3.83	1	09100 Metabolism;09102 Energy metabolism;00196 Photosynthesis - antenna proteins;K14172	K14172	LHCB7	light-harvesting complex II chlorophyll a/b binding protein 7
dark-hl	UPREGULATED	-1.791	0.998	09100 Metabolism;09102 Energy metabolism;00680 Methane metabolism;K00024	K00024	mdh	malate dehydrogenase [EC:1.1.1.37]
dark-hl	UPREGULATED	-2.299	1	09100 Metabolism;09102 Energy metabolism;00680 Methane metabolism;K00058	K00058	serA,	D-3-phosphoglycerate dehydrogenase / 2-oxoglutarate reductase [EC:1.1.1.95 1.1.1.399]
dark-hl	UPREGULATED	-2.521	1	09100 Metabolism;09102 Energy metabolism;00680 Methane metabolism;K00600	K00600	glyA,	glycine hydroxymethyltransferase [EC:2.1.2.1]
dark-hl	UPREGULATED	-2.736	1	09100 Metabolism;09102 Energy metabolism;00680 Methane metabolism;K00831	K00831	serC,	phosphoserine aminotransferase [EC:2.6.1.52]
dark-hl	UPREGULATED	-1.752	0.995	09100 Metabolism;09102 Energy metabolism;00680 Methane metabolism;K01623	K01623	ALDO	fructose-bisphosphate aldolase, class I [EC:4.1.2.13]
dark-hl	UPREGULATED	-2.776	1	09100 Metabolism;09102 Energy metabolism;00680 Methane metabolism;K01624	K01624	FBA,	fructose-bisphosphate aldolase, class II [EC:4.1.2.13]
dark-hl	UPREGULATED	-1.978	1	09100 Metabolism;09102 Energy metabolism;00680 Methane metabolism;K03841	K03841	FBP,	fructose-1,6-bisphosphatase I [EC:3.1.3.11]
dark-hl	UPREGULATED	-1.791	0.998	09100 Metabolism;09102 Energy metabolism;00710 Carbon fixation in photosynthetic organisms;K00024	K00024	mdh	malate dehydrogenase [EC:1.1.1.37]
dark-hl	UPREGULATED	-2.757	1	09100 Metabolism;09102 Energy metabolism;00710 Carbon fixation in photosynthetic organisms;K00026	K00026	MDH2	malate dehydrogenase [EC:1.1.1.37]
dark-hl	UPREGULATED	-3.83	1	09100 Metabolism;09102 Energy metabolism;00710 Carbon fixation in photosynthetic organisms;K00134	K00134	GAPDH,	glyceraldehyde 3-phosphate dehydrogenase (phosphorylating) [EC:1.2.1.12]
dark-hl	UPREGULATED	-2.839	1	09100 Metabolism;09102 Energy metabolism;00710 Carbon fixation in photosynthetic organisms;K00615	K00615	E2.2.1.1,	transketolase [EC:2.2.1.1]
dark-hl	UPREGULATED	-1.379	0.965	09100 Metabolism;09102 Energy metabolism;00710 Carbon fixation in photosynthetic organisms;K00814	K00814	GPT,	alanine transaminase [EC:2.6.1.2]
dark-hl	UPREGULATED	-2.553	1	09100 Metabolism;09102 Energy metabolism;00710 Carbon fixation in photosynthetic organisms;K00855	K00855	PRK,	phosphoribulokinase [EC:2.7.1.19]
dark-hl	UPREGULATED	-4.761	1	09100 Metabolism;09102 Energy metabolism;00710 Carbon fixation in photosynthetic organisms;K00927	K00927	PGK,	phosphoglycerate kinase [EC:2.7.2.3]
dark-hl	UPREGULATED	-2.179	0.997	09100 Metabolism;09102 Energy metabolism;00710 Carbon fixation in photosynthetic organisms;K01100	K01100	E3.1.3.37	sedoheptulose-bisphosphatase [EC:3.1.3.37]
dark-hl	UPREGULATED	-1.752	0.995	09100 Metabolism;09102 Energy metabolism;00710 Carbon fixation in photosynthetic organisms;K01623	K01623	ALDO	fructose-bisphosphate aldolase, class I [EC:4.1.2.13]
dark-hl	UPREGULATED	-2.776	1	09100 Metabolism;09102 Energy metabolism;00710 Carbon fixation in photosynthetic organisms;K01624	K01624	FBA,	fructose-bisphosphate aldolase, class II [EC:4.1.2.13]
dark-hl	UPREGULATED	-1.446	1	09100 Metabolism;09102 Energy metabolism;00710 Carbon fixation in photosynthetic organisms;K01783	K01783	rpe,	ribulose-phosphate 3-epimerase [EC:5.1.3.1]
dark-hl	UPREGULATED	-4.766	1	09100 Metabolism;09102 Energy metabolism;00710 Carbon fixation in photosynthetic organisms;K01803	K01803	TPI,	triosephosphate isomerase (TIM) [EC:5.3.1.1]
dark-hl	UPREGULATED	-2.009	1	09100 Metabolism;09102 Energy metabolism;00710 Carbon fixation in photosynthetic organisms;K01807	K01807	rpiA	ribose 5-phosphate isomerase A [EC:5.3.1.6]
dark-hl	UPREGULATED	-1.978	1	09100 Metabolism;09102 Energy metabolism;00710 Carbon fixation in photosynthetic organisms;K03841	K03841	FBP,	fructose-1,6-bisphosphatase I [EC:3.1.3.11]
dark-hl	UPREGULATED	-1.791	0.998	09100 Metabolism;09102 Energy metabolism;00720 Carbon fixation pathways in prokaryotes;K00024	K00024	mdh	malate dehydrogenase [EC:1.1.1.37]
dark-hl	UPREGULATED	-2.308	1	09100 Metabolism;09102 Energy metabolism;00720 Carbon fixation pathways in prokaryotes;K00297	K00297	metF,	methylenetetrahydrofolate reductase (NADH) [EC:1.5.1.54]
dark-hl	UPREGULATED	-1.875	1	09100 Metabolism;09102 Energy metabolism;00720 Carbon fixation pathways in prokaryotes;K01958	K01958	PC,	pyruvate carboxylase [EC:6.4.1.1]
dark-hl	UPREGULATED	-1.792	0.985	09100 Metabolism;09102 Energy metabolism;00910 Nitrogen metabolism;K00264	K00264	GLT1	glutamate synthase (NADH) [EC:1.4.1.14]
dark-hl	UPREGULATED	-1.792	0.985	09100 Metabolism;09102 Energy metabolism;00910 Nitrogen metabolism;K00266	K00266	gltD	glutamate synthase (NADPH) small chain [EC:1.4.1.13]
dark-hl	UPREGULATED	-2.24	1	09100 Metabolism;09102 Energy metabolism;00910 Nitrogen metabolism;K00284	K00284	GLU,	glutamate synthase (ferredoxin) [EC:1.4.7.1]
dark-hl	UPREGULATED	-2.639	1	09100 Metabolism;09102 Energy metabolism;00910 Nitrogen metabolism;K00366	K00366	nirA	ferredoxin-nitrite reductase [EC:1.7.7.1]
dark-hl	UPREGULATED	-1.935	0.987	09100 Metabolism;09102 Energy metabolism;00910 Nitrogen metabolism;K01948	K01948	CPS1	carbamoyl-phosphate synthase (ammonia) [EC:6.3.4.16]
dark-hl	UPREGULATED	-3.01	1	09100 Metabolism;09102 Energy metabolism;00910 Nitrogen metabolism;K10534	K10534	NR	nitrate reductase (NAD(P)H) [EC:1.7.1.1 1.7.1.2 1.7.1.3]
dark-hl	UPREGULATED	-4.116	1	09100 Metabolism;09102 Energy metabolism;00920 Sulfur metabolism;K00390	K00390	cysH	phosphoadenosine phosphosulfate reductase [EC:1.8.4.8 1.8.4.10]
dark-hl	UPREGULATED	-2.639	1	09100 Metabolism;09102 Energy metabolism;00920 Sulfur metabolism;K00392	K00392	sir	sulfite reductase (ferredoxin) [EC:1.8.7.1]
dark-hl	UPREGULATED	-4.325	1	09100 Metabolism;09102 Energy metabolism;00920 Sulfur metabolism;K00958	K00958	sat,	sulfate adenylyltransferase [EC:2.7.7.4]
dark-hl	UPREGULATED	-1.106	0.968	09100 Metabolism;09102 Energy metabolism;00920 Sulfur metabolism;K02048	K02048	cysP	sulfate/thiosulfate transport system substrate-binding protein
dark-hl	UPREGULATED	-1.088	0.999	09100 Metabolism;09102 Energy metabolism;00920 Sulfur metabolism;K03119	K03119	tauD	taurine dioxygenase [EC:1.14.11.17]
dark-hl	UPREGULATED	-1.93	0.987	09100 Metabolism;09102 Energy metabolism;00920 Sulfur metabolism;K13811	K13811	PAPSS	3'-phosphoadenosine 5'-phosphosulfate synthase [EC:2.7.7.4 2.7.1.25]
dark-hl	UPREGULATED	-1.663	1	09100 Metabolism;09102 Energy metabolism;00920 Sulfur metabolism;K17285	K17285	SELENBP1	methanethiol oxidase [EC:1.8.3.4]
dark-hl	UPREGULATED	-1.66	0.979	09100 Metabolism;09103 Lipid metabolism;00061 Fatty acid biosynthesis;K00059	K00059	fabG,	3-oxoacyl-[acyl-carrier protein] reductase [EC:1.1.1.100]
dark-hl	UPREGULATED	-2.33	1	09100 Metabolism;09103 Lipid metabolism;00061 Fatty acid biosynthesis;K03955	K03955	NDUFAB1	NADH dehydrogenase (ubiquinone) 1 alpha/beta subcomplex 1, acyl-carrier protein
dark-hl	UPREGULATED	-2.209	1	09100 Metabolism;09103 Lipid metabolism;00061 Fatty acid biosynthesis;K09458	K09458	fabF,	3-oxoacyl-[acyl-carrier-protein] synthase II [EC:2.3.1.179]
dark-hl	UPREGULATED	-1.688	0.999	09100 Metabolism;09103 Lipid metabolism;00061 Fatty acid biosynthesis;K10781	K10781	FATB	fatty acyl-ACP thioesterase B [EC:3.1.2.14 3.1.2.21]
dark-hl	UPREGULATED	-2.393	1	09100 Metabolism;09103 Lipid metabolism;00061 Fatty acid biosynthesis;K11262	K11262	ACACA	acetyl-CoA carboxylase / biotin carboxylase 1 [EC:6.4.1.2 6.3.4.14 2.1.3.15]
dark-hl	UPREGULATED	-1.005	0.963	09100 Metabolism;09103 Lipid metabolism;00061 Fatty acid biosynthesis;K18660	K18660	ACSF3	malonyl-CoA/methylmalonyl-CoA synthetase [EC:6.2.1.76 6.2.1.-]
dark-hl	UPREGULATED	-1.681	0.97	09100 Metabolism;09103 Lipid metabolism;00062 Fatty acid elongation;K10203	K10203	ELOVL6	elongation of very long chain fatty acids protein 6 [EC:2.3.1.199]
dark-hl	UPREGULATED	-2.765	1	09100 Metabolism;09103 Lipid metabolism;00071 Fatty acid degradation;K00128	K00128	ALDH	aldehyde dehydrogenase (NAD+) [EC:1.2.1.3]
dark-hl	UPREGULATED	-1.862	1	09100 Metabolism;09103 Lipid metabolism;00073 Cutin, suberine and wax biosynthesis;K15402	K15402	CYP86B1	fatty acid omega-hydroxylase [EC:1.14.-.-]
dark-hl	UPREGULATED	-3.779	1	09100 Metabolism;09103 Lipid metabolism;00100 Steroid biosynthesis;K00227	K00227	SC5DL,	Delta7-sterol 5-desaturase [EC:1.14.19.20]
dark-hl	UPREGULATED	-1.863	1	09100 Metabolism;09103 Lipid metabolism;00100 Steroid biosynthesis;K00559	K00559	SMT1,	sterol 24-C-methyltransferase [EC:2.1.1.41]
dark-hl	UPREGULATED	-2.839	1	09100 Metabolism;09103 Lipid metabolism;00100 Steroid biosynthesis;K00801	K00801	FDFT1	farnesyl-diphosphate farnesyltransferase [EC:2.5.1.21]
dark-hl	UPREGULATED	-3.685	1	09100 Metabolism;09103 Lipid metabolism;00100 Steroid biosynthesis;K07748	K07748	NSDHL,	sterol-4alpha-carboxylate 3-dehydrogenase (decarboxylating) [EC:1.1.1.170]
dark-hl	UPREGULATED	-1.863	1	09100 Metabolism;09103 Lipid metabolism;00100 Steroid biosynthesis;K08242	K08242	E2.1.1.143	24-methylenesterol C-methyltransferase [EC:2.1.1.143]
dark-hl	UPREGULATED	-2.765	1	09100 Metabolism;09103 Lipid metabolism;00561 Glycerolipid metabolism;K00128	K00128	ALDH	aldehyde dehydrogenase (NAD+) [EC:1.2.1.3]
dark-hl	UPREGULATED	-2.831	1	09100 Metabolism;09103 Lipid metabolism;00561 Glycerolipid metabolism;K00901	K00901	dgkA,	diacylglycerol kinase (ATP) [EC:2.7.1.107]
dark-hl	UPREGULATED	-3.584	1	09100 Metabolism;09103 Lipid metabolism;00561 Glycerolipid metabolism;K01054	K01054	MGLL	acylglycerol lipase [EC:3.1.1.23]
dark-hl	UPREGULATED	-2.846	1	09100 Metabolism;09103 Lipid metabolism;00561 Glycerolipid metabolism;K03715	K03715	MGD	1,2-diacylglycerol 3-beta-galactosyltransferase [EC:2.4.1.46]
dark-hl	UPREGULATED	-1.952	1	09100 Metabolism;09103 Lipid metabolism;00561 Glycerolipid metabolism;K15728	K15728	LPIN	phosphatidate phosphatase LPIN [EC:3.1.3.4]
dark-hl	UPREGULATED	-2.66	1	09100 Metabolism;09103 Lipid metabolism;00564 Glycerophospholipid metabolism;K00550	K00550	PLMT	phosphatidyl-N-methylethanolamine N-methyltransferase [EC:2.1.1.71]
dark-hl	UPREGULATED	-2.831	1	09100 Metabolism;09103 Lipid metabolism;00564 Glycerophospholipid metabolism;K00901	K00901	dgkA,	diacylglycerol kinase (ATP) [EC:2.7.1.107]
dark-hl	UPREGULATED	-2.579	0.999	09100 Metabolism;09103 Lipid metabolism;00564 Glycerophospholipid metabolism;K00993	K00993	EPT1	ethanolaminephosphotransferase [EC:2.7.8.1]
dark-hl	UPREGULATED	-2.187	0.995	09100 Metabolism;09103 Lipid metabolism;00564 Glycerophospholipid metabolism;K01126	K01126	E3.1.4.46,	glycerophosphoryl diester phosphodiesterase [EC:3.1.4.46]
dark-hl	UPREGULATED	-1.952	1	09100 Metabolism;09103 Lipid metabolism;00564 Glycerophospholipid metabolism;K01613	K01613	psd,	phosphatidylserine decarboxylase [EC:4.1.1.65]
dark-hl	UPREGULATED	-1.531	0.983	09100 Metabolism;09103 Lipid metabolism;00564 Glycerophospholipid metabolism;K13623	K13623	btaB	S-adenosylmethionine-diacylgycerolhomoserine-N-methlytransferase
dark-hl	UPREGULATED	-1.952	1	09100 Metabolism;09103 Lipid metabolism;00564 Glycerophospholipid metabolism;K15728	K15728	LPIN	phosphatidate phosphatase LPIN [EC:3.1.3.4]
dark-hl	UPREGULATED	-2.579	0.999	09100 Metabolism;09103 Lipid metabolism;00565 Ether lipid metabolism;K00993	K00993	EPT1	ethanolaminephosphotransferase [EC:2.7.8.1]
dark-hl	UPREGULATED	-1.619	0.999	09100 Metabolism;09103 Lipid metabolism;00565 Ether lipid metabolism;K20656	K20656	TMEM189	plasmanylethanolamine desaturase [EC:1.14.19.77]
dark-hl	UPREGULATED	-3.893	1	09100 Metabolism;09103 Lipid metabolism;00590 Arachidonic acid metabolism;K07119	K07119	PTGR3,	prostaglandin reductase 3 [EC:1.3.1.48]
dark-hl	UPREGULATED	-4.006	1	09100 Metabolism;09103 Lipid metabolism;00592 alpha-Linolenic acid metabolism;K10226	K10226	FADS2	acyl-CoA 6-desaturase (Delta-6 desaturase) [EC:1.14.19.3]
dark-hl	UPREGULATED	-3.938	1	09100 Metabolism;09103 Lipid metabolism;00600 Sphingolipid metabolism;K00654	K00654	SPT	serine palmitoyltransferase [EC:2.3.1.50]
dark-hl	UPREGULATED	-2.344	1	09100 Metabolism;09103 Lipid metabolism;00600 Sphingolipid metabolism;K04710	K04710	CERS1,	sphingoid base N-stearoyltransferase [EC:2.3.1.299]
dark-hl	UPREGULATED	-3.938	1	09100 Metabolism;09103 Lipid metabolism;00600 Sphingolipid metabolism;K04716	K04716	SGPP1	sphingosine-1-phosphate phosphatase 1 [EC:3.1.3.-]
dark-hl	UPREGULATED	-3.938	1	09100 Metabolism;09103 Lipid metabolism;00600 Sphingolipid metabolism;K04717	K04717	SGPP2	sphingosine-1-phosphate phosphotase 2 [EC:3.1.3.-]
dark-hl	UPREGULATED	-1.342	1	09100 Metabolism;09103 Lipid metabolism;01040 Biosynthesis of unsaturated fatty acids;K00507	K00507	SCD,	stearoyl-CoA desaturase (Delta-9 desaturase) [EC:1.14.19.1]
dark-hl	UPREGULATED	-1.681	0.97	09100 Metabolism;09103 Lipid metabolism;01040 Biosynthesis of unsaturated fatty acids;K10203	K10203	ELOVL6	elongation of very long chain fatty acids protein 6 [EC:2.3.1.199]
dark-hl	UPREGULATED	-4.006	1	09100 Metabolism;09103 Lipid metabolism;01040 Biosynthesis of unsaturated fatty acids;K10226	K10226	FADS2	acyl-CoA 6-desaturase (Delta-6 desaturase) [EC:1.14.19.3]
dark-hl	UPREGULATED	-1.095	0.995	09100 Metabolism;09103 Lipid metabolism;01040 Biosynthesis of unsaturated fatty acids;K10256	K10256	FAD2	omega-6 fatty acid desaturase / acyl-lipid omega-6 desaturase (Delta-12 desaturase) [EC:1.14.19.6 1.14.19.22]
dark-hl	UPREGULATED	-1.365	1	09100 Metabolism;09104 Nucleotide metabolism;00230 Purine metabolism;K00088	K00088	IMPDH,	IMP dehydrogenase [EC:1.1.1.205]
dark-hl	UPREGULATED	-2.791	1	09100 Metabolism;09104 Nucleotide metabolism;00230 Purine metabolism;K00525	K00525	E1.17.4.1A,	ribonucleoside-diphosphate reductase alpha chain [EC:1.17.4.1]
dark-hl	UPREGULATED	-2.297	1	09100 Metabolism;09104 Nucleotide metabolism;00230 Purine metabolism;K00602	K00602	purH	phosphoribosylaminoimidazolecarboxamide formyltransferase / IMP cyclohydrolase [EC:2.1.2.3 3.5.4.10]
dark-hl	UPREGULATED	-1.688	0.999	09100 Metabolism;09104 Nucleotide metabolism;00230 Purine metabolism;K00759	K00759	APRT,	adenine phosphoribosyltransferase [EC:2.4.2.7]
dark-hl	UPREGULATED	-6.043	1	09100 Metabolism;09104 Nucleotide metabolism;00230 Purine metabolism;K00856	K00856	ADK,	adenosine kinase [EC:2.7.1.20]
dark-hl	UPREGULATED	-1.823	0.994	09100 Metabolism;09104 Nucleotide metabolism;00230 Purine metabolism;K00940	K00940	ndk,	nucleoside-diphosphate kinase [EC:2.7.4.6]
dark-hl	UPREGULATED	-1.875	1	09100 Metabolism;09104 Nucleotide metabolism;00230 Purine metabolism;K00942	K00942	gmk,	guanylate kinase [EC:2.7.4.8]
dark-hl	UPREGULATED	-4.325	1	09100 Metabolism;09104 Nucleotide metabolism;00230 Purine metabolism;K00958	K00958	sat,	sulfate adenylyltransferase [EC:2.7.7.4]
dark-hl	UPREGULATED	-2.238	1	09100 Metabolism;09104 Nucleotide metabolism;00230 Purine metabolism;K01487	K01487	guaD,	guanine deaminase [EC:3.5.4.3]
dark-hl	UPREGULATED	-3.915	1	09100 Metabolism;09104 Nucleotide metabolism;00230 Purine metabolism;K01756	K01756	purB,	adenylosuccinate lyase [EC:4.3.2.2]
dark-hl	UPREGULATED	-3.917	1	09100 Metabolism;09104 Nucleotide metabolism;00230 Purine metabolism;K01835	K01835	pgm	phosphoglucomutase [EC:5.4.2.2]
dark-hl	UPREGULATED	-3.408	1	09100 Metabolism;09104 Nucleotide metabolism;00230 Purine metabolism;K01933	K01933	purM	phosphoribosylformylglycinamidine cyclo-ligase [EC:6.3.3.1]
dark-hl	UPREGULATED	-1.641	0.996	09100 Metabolism;09104 Nucleotide metabolism;00230 Purine metabolism;K01939	K01939	purA,	adenylosuccinate synthase [EC:6.3.4.4]
dark-hl	UPREGULATED	-2.754	1	09100 Metabolism;09104 Nucleotide metabolism;00230 Purine metabolism;K01951	K01951	guaA,	GMP synthase (glutamine-hydrolysing) [EC:6.3.5.2]
dark-hl	UPREGULATED	-3.262	1	09100 Metabolism;09104 Nucleotide metabolism;00230 Purine metabolism;K01952	K01952	PFAS,	phosphoribosylformylglycinamidine synthase [EC:6.3.5.3]
dark-hl	UPREGULATED	-2.387	0.999	09100 Metabolism;09104 Nucleotide metabolism;00230 Purine metabolism;K03816	K03816	xpt	xanthine phosphoribosyltransferase [EC:2.4.2.22]
dark-hl	UPREGULATED	-1.979	0.99	09100 Metabolism;09104 Nucleotide metabolism;00230 Purine metabolism;K11808	K11808	ADE2	phosphoribosylaminoimidazole carboxylase [EC:4.1.1.21]
dark-hl	UPREGULATED	-1.93	0.987	09100 Metabolism;09104 Nucleotide metabolism;00230 Purine metabolism;K13811	K13811	PAPSS	3'-phosphoadenosine 5'-phosphosulfate synthase [EC:2.7.7.4 2.7.1.25]
dark-hl	UPREGULATED	-2.292	0.997	09100 Metabolism;09104 Nucleotide metabolism;00230 Purine metabolism;K18532	K18532	AK6,	adenylate kinase [EC:2.7.4.3]
dark-hl	UPREGULATED	-2.791	1	09100 Metabolism;09104 Nucleotide metabolism;00240 Pyrimidine metabolism;K00525	K00525	E1.17.4.1A,	ribonucleoside-diphosphate reductase alpha chain [EC:1.17.4.1]
dark-hl	UPREGULATED	-1.823	0.994	09100 Metabolism;09104 Nucleotide metabolism;00240 Pyrimidine metabolism;K00940	K00940	ndk,	nucleoside-diphosphate kinase [EC:2.7.4.6]
dark-hl	UPREGULATED	-2.559	1	09100 Metabolism;09104 Nucleotide metabolism;00240 Pyrimidine metabolism;K01431	K01431	UPB1,	beta-ureidopropionase [EC:3.5.1.6]
dark-hl	UPREGULATED	-2.839	1	09100 Metabolism;09104 Nucleotide metabolism;00240 Pyrimidine metabolism;K01520	K01520	dut,	dUTP diphosphatase [EC:3.6.1.23]
dark-hl	UPREGULATED	-3.027	1	09100 Metabolism;09104 Nucleotide metabolism;00240 Pyrimidine metabolism;K01937	K01937	pyrG,	CTP synthase [EC:6.3.4.2]
dark-hl	UPREGULATED	-3.786	1	09100 Metabolism;09104 Nucleotide metabolism;00240 Pyrimidine metabolism;K01954	K01954	K01954	carbamoyl-phosphate synthase [EC:6.3.5.5]
dark-hl	UPREGULATED	-1.935	0.987	09100 Metabolism;09104 Nucleotide metabolism;00240 Pyrimidine metabolism;K11540	K11540	CAD	carbamoyl-phosphate synthase / aspartate carbamoyltransferase / dihydroorotase [EC:6.3.5.5 2.1.3.2 3.5.2.3]
dark-hl	UPREGULATED	-4.359	1	09100 Metabolism;09104 Nucleotide metabolism;00240 Pyrimidine metabolism;K11541	K11541	URA2	carbamoyl-phosphate synthase / aspartate carbamoyltransferase [EC:6.3.5.5 2.1.3.2]
dark-hl	UPREGULATED	-2.341	0.998	09100 Metabolism;09104 Nucleotide metabolism;00240 Pyrimidine metabolism;K16066	K16066	ydfG	3-hydroxy acid dehydrogenase / malonic semialdehyde reductase [EC:1.1.1.381 1.1.1.-]
dark-hl	UPREGULATED	-2.237	0.998	09100 Metabolism;09105 Amino acid metabolism;00220 Arginine biosynthesis;K00145	K00145	argC	N-acetyl-gamma-glutamyl-phosphate reductase [EC:1.2.1.38]
dark-hl	UPREGULATED	-1.379	0.965	09100 Metabolism;09105 Amino acid metabolism;00220 Arginine biosynthesis;K00814	K00814	GPT,	alanine transaminase [EC:2.6.1.2]
dark-hl	UPREGULATED	-3.786	1	09100 Metabolism;09105 Amino acid metabolism;00220 Arginine biosynthesis;K01940	K01940	argG,	argininosuccinate synthase [EC:6.3.4.5]
dark-hl	UPREGULATED	-1.935	0.987	09100 Metabolism;09105 Amino acid metabolism;00220 Arginine biosynthesis;K01948	K01948	CPS1	carbamoyl-phosphate synthase (ammonia) [EC:6.3.4.16]
dark-hl	UPREGULATED	-1.792	0.985	09100 Metabolism;09105 Amino acid metabolism;00250 Alanine, aspartate and glutamate metabolism;K00264	K00264	GLT1	glutamate synthase (NADH) [EC:1.4.1.14]
dark-hl	UPREGULATED	-1.792	0.985	09100 Metabolism;09105 Amino acid metabolism;00250 Alanine, aspartate and glutamate metabolism;K00266	K00266	gltD	glutamate synthase (NADPH) small chain [EC:1.4.1.13]
dark-hl	UPREGULATED	-1.379	0.965	09100 Metabolism;09105 Amino acid metabolism;00250 Alanine, aspartate and glutamate metabolism;K00814	K00814	GPT,	alanine transaminase [EC:2.6.1.2]
dark-hl	UPREGULATED	-2.499	1	09100 Metabolism;09105 Amino acid metabolism;00250 Alanine, aspartate and glutamate metabolism;K00820	K00820	glmS,	glutamine---fructose-6-phosphate transaminase (isomerizing) [EC:2.6.1.16]
dark-hl	UPREGULATED	-3.915	1	09100 Metabolism;09105 Amino acid metabolism;00250 Alanine, aspartate and glutamate metabolism;K01756	K01756	purB,	adenylosuccinate lyase [EC:4.3.2.2]
dark-hl	UPREGULATED	-1.641	0.996	09100 Metabolism;09105 Amino acid metabolism;00250 Alanine, aspartate and glutamate metabolism;K01939	K01939	purA,	adenylosuccinate synthase [EC:6.3.4.4]
dark-hl	UPREGULATED	-3.786	1	09100 Metabolism;09105 Amino acid metabolism;00250 Alanine, aspartate and glutamate metabolism;K01940	K01940	argG,	argininosuccinate synthase [EC:6.3.4.5]
dark-hl	UPREGULATED	-1.935	0.987	09100 Metabolism;09105 Amino acid metabolism;00250 Alanine, aspartate and glutamate metabolism;K01948	K01948	CPS1	carbamoyl-phosphate synthase (ammonia) [EC:6.3.4.16]
dark-hl	UPREGULATED	-2.302	1	09100 Metabolism;09105 Amino acid metabolism;00250 Alanine, aspartate and glutamate metabolism;K01953	K01953	asnB,	asparagine synthase (glutamine-hydrolysing) [EC:6.3.5.4]
dark-hl	UPREGULATED	-3.786	1	09100 Metabolism;09105 Amino acid metabolism;00250 Alanine, aspartate and glutamate metabolism;K01954	K01954	K01954	carbamoyl-phosphate synthase [EC:6.3.5.5]
dark-hl	UPREGULATED	-1.935	0.987	09100 Metabolism;09105 Amino acid metabolism;00250 Alanine, aspartate and glutamate metabolism;K11540	K11540	CAD	carbamoyl-phosphate synthase / aspartate carbamoyltransferase / dihydroorotase [EC:6.3.5.5 2.1.3.2 3.5.2.3]
dark-hl	UPREGULATED	-4.359	1	09100 Metabolism;09105 Amino acid metabolism;00250 Alanine, aspartate and glutamate metabolism;K11541	K11541	URA2	carbamoyl-phosphate synthase / aspartate carbamoyltransferase [EC:6.3.5.5 2.1.3.2]
dark-hl	UPREGULATED	-3.82	1	09100 Metabolism;09105 Amino acid metabolism;00250 Alanine, aspartate and glutamate metabolism;K13566	K13566	NIT2,	omega-amidase [EC:3.5.1.3]
dark-hl	UPREGULATED	-2.979	1	09100 Metabolism;09105 Amino acid metabolism;00260 Glycine, serine and threonine metabolism;K00003	K00003	hom	homoserine dehydrogenase [EC:1.1.1.3]
dark-hl	UPREGULATED	-2.299	1	09100 Metabolism;09105 Amino acid metabolism;00260 Glycine, serine and threonine metabolism;K00058	K00058	serA,	D-3-phosphoglycerate dehydrogenase / 2-oxoglutarate reductase [EC:1.1.1.95 1.1.1.399]
dark-hl	UPREGULATED	-3.188	1	09100 Metabolism;09105 Amino acid metabolism;00260 Glycine, serine and threonine metabolism;K00133	K00133	asd	aspartate-semialdehyde dehydrogenase [EC:1.2.1.11]
dark-hl	UPREGULATED	-1.24	0.994	09100 Metabolism;09105 Amino acid metabolism;00260 Glycine, serine and threonine metabolism;K00306	K00306	PIPOX	sarcosine oxidase / L-pipecolate oxidase [EC:1.5.3.1 1.5.3.7]
dark-hl	UPREGULATED	-2.625	1	09100 Metabolism;09105 Amino acid metabolism;00260 Glycine, serine and threonine metabolism;K00382	K00382	DLD,	dihydrolipoyl dehydrogenase [EC:1.8.1.4]
dark-hl	UPREGULATED	-2.521	1	09100 Metabolism;09105 Amino acid metabolism;00260 Glycine, serine and threonine metabolism;K00600	K00600	glyA,	glycine hydroxymethyltransferase [EC:2.1.2.1]
dark-hl	UPREGULATED	-3.435	1	09100 Metabolism;09105 Amino acid metabolism;00260 Glycine, serine and threonine metabolism;K00605	K00605	gcvT,	glycine cleavage system T protein (aminomethyltransferase) [EC:2.1.2.10]
dark-hl	UPREGULATED	-2.736	1	09100 Metabolism;09105 Amino acid metabolism;00260 Glycine, serine and threonine metabolism;K00831	K00831	serC,	phosphoserine aminotransferase [EC:2.6.1.52]
dark-hl	UPREGULATED	-2.132	0.999	09100 Metabolism;09105 Amino acid metabolism;00260 Glycine, serine and threonine metabolism;K01694	K01694	TRP	tryptophan synthase [EC:4.2.1.20]
dark-hl	UPREGULATED	-2.132	0.999	09100 Metabolism;09105 Amino acid metabolism;00260 Glycine, serine and threonine metabolism;K01695	K01695	trpA	tryptophan synthase alpha chain [EC:4.2.1.20]
dark-hl	UPREGULATED	-2.132	0.999	09100 Metabolism;09105 Amino acid metabolism;00260 Glycine, serine and threonine metabolism;K01696	K01696	trpB	tryptophan synthase beta chain [EC:4.2.1.20]
dark-hl	UPREGULATED	-2.353	0.999	09100 Metabolism;09105 Amino acid metabolism;00260 Glycine, serine and threonine metabolism;K12524	K12524	thrA	bifunctional aspartokinase / homoserine dehydrogenase 1 [EC:2.7.2.4 1.1.1.3]
dark-hl	UPREGULATED	-2.341	0.998	09100 Metabolism;09105 Amino acid metabolism;00260 Glycine, serine and threonine metabolism;K16066	K16066	ydfG	3-hydroxy acid dehydrogenase / malonic semialdehyde reductase [EC:1.1.1.381 1.1.1.-]
dark-hl	UPREGULATED	-2.979	1	09100 Metabolism;09105 Amino acid metabolism;00270 Cysteine and methionine metabolism;K00003	K00003	hom	homoserine dehydrogenase [EC:1.1.1.3]
dark-hl	UPREGULATED	-1.791	0.998	09100 Metabolism;09105 Amino acid metabolism;00270 Cysteine and methionine metabolism;K00024	K00024	mdh	malate dehydrogenase [EC:1.1.1.37]
dark-hl	UPREGULATED	-2.757	1	09100 Metabolism;09105 Amino acid metabolism;00270 Cysteine and methionine metabolism;K00026	K00026	MDH2	malate dehydrogenase [EC:1.1.1.37]
dark-hl	UPREGULATED	-2.299	1	09100 Metabolism;09105 Amino acid metabolism;00270 Cysteine and methionine metabolism;K00058	K00058	serA,	D-3-phosphoglycerate dehydrogenase / 2-oxoglutarate reductase [EC:1.1.1.95 1.1.1.399]
dark-hl	UPREGULATED	-3.188	1	09100 Metabolism;09105 Amino acid metabolism;00270 Cysteine and methionine metabolism;K00133	K00133	asd	aspartate-semialdehyde dehydrogenase [EC:1.2.1.11]
dark-hl	UPREGULATED	-5.09	1	09100 Metabolism;09105 Amino acid metabolism;00270 Cysteine and methionine metabolism;K00789	K00789	metK,	S-adenosylmethionine synthetase [EC:2.5.1.6]
dark-hl	UPREGULATED	-2.474	0.999	09100 Metabolism;09105 Amino acid metabolism;00270 Cysteine and methionine metabolism;K00816	K00816	CCBL	kynurenine---oxoglutarate transaminase / cysteine-S-conjugate beta-lyase / glutamine---phenylpyruvate transaminase [EC:2.6.1.7 4.4.1.13 2.6.1.64]
dark-hl	UPREGULATED	-3.224	1	09100 Metabolism;09105 Amino acid metabolism;00270 Cysteine and methionine metabolism;K00826	K00826	E2.6.1.42,	branched-chain amino acid aminotransferase [EC:2.6.1.42]
dark-hl	UPREGULATED	-2.736	1	09100 Metabolism;09105 Amino acid metabolism;00270 Cysteine and methionine metabolism;K00831	K00831	serC,	phosphoserine aminotransferase [EC:2.6.1.52]
dark-hl	UPREGULATED	-4.347	1	09100 Metabolism;09105 Amino acid metabolism;00270 Cysteine and methionine metabolism;K01251	K01251	AHCY,	adenosylhomocysteinase [EC:3.13.2.1]
dark-hl	UPREGULATED	-4.413	1	09100 Metabolism;09105 Amino acid metabolism;00270 Cysteine and methionine metabolism;K01611	K01611	speD,	S-adenosylmethionine decarboxylase [EC:4.1.1.50]
dark-hl	UPREGULATED	-2.353	0.999	09100 Metabolism;09105 Amino acid metabolism;00270 Cysteine and methionine metabolism;K12524	K12524	thrA	bifunctional aspartokinase / homoserine dehydrogenase 1 [EC:2.7.2.4 1.1.1.3]
dark-hl	UPREGULATED	-2.254	1	09100 Metabolism;09105 Amino acid metabolism;00270 Cysteine and methionine metabolism;K21456	K21456	GSS	glutathione synthase [EC:6.3.2.3]
dark-hl	UPREGULATED	-2.765	1	09100 Metabolism;09105 Amino acid metabolism;00280 Valine, leucine and isoleucine degradation;K00128	K00128	ALDH	aldehyde dehydrogenase (NAD+) [EC:1.2.1.3]
dark-hl	UPREGULATED	-1.66	0.979	09100 Metabolism;09105 Amino acid metabolism;00280 Valine, leucine and isoleucine degradation;K00167	K00167	BCKDHB,	2-oxoisovalerate dehydrogenase E1 component subunit beta [EC:1.2.4.4]
dark-hl	UPREGULATED	-2.625	1	09100 Metabolism;09105 Amino acid metabolism;00280 Valine, leucine and isoleucine degradation;K00382	K00382	DLD,	dihydrolipoyl dehydrogenase [EC:1.8.1.4]
dark-hl	UPREGULATED	-3.224	1	09100 Metabolism;09105 Amino acid metabolism;00280 Valine, leucine and isoleucine degradation;K00826	K00826	E2.6.1.42,	branched-chain amino acid aminotransferase [EC:2.6.1.42]
dark-hl	UPREGULATED	-1.005	0.963	09100 Metabolism;09105 Amino acid metabolism;00280 Valine, leucine and isoleucine degradation;K18660	K18660	ACSF3	malonyl-CoA/methylmalonyl-CoA synthetase [EC:6.2.1.76 6.2.1.-]
dark-hl	UPREGULATED	-3.224	1	09100 Metabolism;09105 Amino acid metabolism;00290 Valine, leucine and isoleucine biosynthesis;K00826	K00826	E2.6.1.42,	branched-chain amino acid aminotransferase [EC:2.6.1.42]
dark-hl	UPREGULATED	-2.979	1	09100 Metabolism;09105 Amino acid metabolism;00300 Lysine biosynthesis;K00003	K00003	hom	homoserine dehydrogenase [EC:1.1.1.3]
dark-hl	UPREGULATED	-3.188	1	09100 Metabolism;09105 Amino acid metabolism;00300 Lysine biosynthesis;K00133	K00133	asd	aspartate-semialdehyde dehydrogenase [EC:1.2.1.11]
dark-hl	UPREGULATED	-2.627	1	09100 Metabolism;09105 Amino acid metabolism;00300 Lysine biosynthesis;K00215	K00215	dapB	4-hydroxy-tetrahydrodipicolinate reductase [EC:1.17.1.8]
dark-hl	UPREGULATED	-4.429	1	09100 Metabolism;09105 Amino acid metabolism;00300 Lysine biosynthesis;K01586	K01586	lysA	diaminopimelate decarboxylase [EC:4.1.1.20]
dark-hl	UPREGULATED	-2.459	0.999	09100 Metabolism;09105 Amino acid metabolism;00300 Lysine biosynthesis;K01714	K01714	dapA	4-hydroxy-tetrahydrodipicolinate synthase [EC:4.3.3.7]
dark-hl	UPREGULATED	-2.404	1	09100 Metabolism;09105 Amino acid metabolism;00300 Lysine biosynthesis;K01778	K01778	dapF	diaminopimelate epimerase [EC:5.1.1.7]
dark-hl	UPREGULATED	-2.353	0.999	09100 Metabolism;09105 Amino acid metabolism;00300 Lysine biosynthesis;K12524	K12524	thrA	bifunctional aspartokinase / homoserine dehydrogenase 1 [EC:2.7.2.4 1.1.1.3]
dark-hl	UPREGULATED	-2.765	1	09100 Metabolism;09105 Amino acid metabolism;00310 Lysine degradation;K00128	K00128	ALDH	aldehyde dehydrogenase (NAD+) [EC:1.2.1.3]
dark-hl	UPREGULATED	-1.24	0.994	09100 Metabolism;09105 Amino acid metabolism;00310 Lysine degradation;K00306	K00306	PIPOX	sarcosine oxidase / L-pipecolate oxidase [EC:1.5.3.1 1.5.3.7]
dark-hl	UPREGULATED	-2.625	1	09100 Metabolism;09105 Amino acid metabolism;00310 Lysine degradation;K00382	K00382	DLD,	dihydrolipoyl dehydrogenase [EC:1.8.1.4]
dark-hl	UPREGULATED	-3.162	1	09100 Metabolism;09105 Amino acid metabolism;00310 Lysine degradation;K09189	K09189	MLL5	[histone H3]-lysine4 N-trimethyltransferase MLL5 [EC:2.1.1.354]
dark-hl	UPREGULATED	-1.915	1	09100 Metabolism;09105 Amino acid metabolism;00310 Lysine degradation;K11419	K11419	SUV39H,	[histone H3]-lysine9 N-trimethyltransferase SUV39H [EC:2.1.1.355]
dark-hl	UPREGULATED	-1.225	0.963	09100 Metabolism;09105 Amino acid metabolism;00310 Lysine degradation;K11703	K11703	GLT25D	collagen beta-1,O-galactosyltransferase [EC:2.4.1.50]
dark-hl	UPREGULATED	-2.765	1	09100 Metabolism;09105 Amino acid metabolism;00330 Arginine and proline metabolism;K00128	K00128	ALDH	aldehyde dehydrogenase (NAD+) [EC:1.2.1.3]
dark-hl	UPREGULATED	-2.237	0.998	09100 Metabolism;09105 Amino acid metabolism;00330 Arginine and proline metabolism;K00286	K00286	proC	pyrroline-5-carboxylate reductase [EC:1.5.1.2]
dark-hl	UPREGULATED	-4.413	1	09100 Metabolism;09105 Amino acid metabolism;00330 Arginine and proline metabolism;K01581	K01581	E4.1.1.17,	ornithine decarboxylase [EC:4.1.1.17]
dark-hl	UPREGULATED	-4.413	1	09100 Metabolism;09105 Amino acid metabolism;00330 Arginine and proline metabolism;K01611	K01611	speD,	S-adenosylmethionine decarboxylase [EC:4.1.1.50]
dark-hl	UPREGULATED	-2.765	1	09100 Metabolism;09105 Amino acid metabolism;00340 Histidine metabolism;K00128	K00128	ALDH	aldehyde dehydrogenase (NAD+) [EC:1.2.1.3]
dark-hl	UPREGULATED	-1.93	0.987	09100 Metabolism;09105 Amino acid metabolism;00340 Histidine metabolism;K00765	K00765	hisG	ATP phosphoribosyltransferase [EC:2.4.2.17]
dark-hl	UPREGULATED	-2.487	1	09100 Metabolism;09105 Amino acid metabolism;00340 Histidine metabolism;K00817	K00817	hisC	histidinol-phosphate aminotransferase [EC:2.6.1.9]
dark-hl	UPREGULATED	-1.489	0.983	09100 Metabolism;09105 Amino acid metabolism;00340 Histidine metabolism;K01663	K01663	HIS7	imidazole glycerol-phosphate synthase [EC:4.3.2.10]
dark-hl	UPREGULATED	-2.205	0.997	09100 Metabolism;09105 Amino acid metabolism;00340 Histidine metabolism;K01814	K01814	hisA	phosphoribosylformimino-5-aminoimidazole carboxamide ribotide isomerase [EC:5.3.1.16]
dark-hl	UPREGULATED	-2.187	0.995	09100 Metabolism;09105 Amino acid metabolism;00340 Histidine metabolism;K14152	K14152	HIS4	phosphoribosyl-ATP pyrophosphohydrolase / phosphoribosyl-AMP cyclohydrolase / histidinol dehydrogenase [EC:3.6.1.31 3.5.4.19 1.1.1.23]
dark-hl	UPREGULATED	-2.352	1	09100 Metabolism;09105 Amino acid metabolism;00350 Tyrosine metabolism;K00505	K00505	TYR	tyrosinase [EC:1.14.18.1]
dark-hl	UPREGULATED	-2.487	1	09100 Metabolism;09105 Amino acid metabolism;00350 Tyrosine metabolism;K00817	K00817	hisC	histidinol-phosphate aminotransferase [EC:2.6.1.9]
dark-hl	UPREGULATED	-2.487	1	09100 Metabolism;09105 Amino acid metabolism;00360 Phenylalanine metabolism;K00817	K00817	hisC	histidinol-phosphate aminotransferase [EC:2.6.1.9]
dark-hl	UPREGULATED	-2.765	1	09100 Metabolism;09105 Amino acid metabolism;00380 Tryptophan metabolism;K00128	K00128	ALDH	aldehyde dehydrogenase (NAD+) [EC:1.2.1.3]
dark-hl	UPREGULATED	-2.625	1	09100 Metabolism;09105 Amino acid metabolism;00380 Tryptophan metabolism;K00382	K00382	DLD,	dihydrolipoyl dehydrogenase [EC:1.8.1.4]
dark-hl	UPREGULATED	-2.474	0.999	09100 Metabolism;09105 Amino acid metabolism;00380 Tryptophan metabolism;K00816	K00816	CCBL	kynurenine---oxoglutarate transaminase / cysteine-S-conjugate beta-lyase / glutamine---phenylpyruvate transaminase [EC:2.6.1.7 4.4.1.13 2.6.1.64]
dark-hl	UPREGULATED	-2.474	0.999	09100 Metabolism;09105 Amino acid metabolism;00380 Tryptophan metabolism;K14264	K14264	BNA3	kynurenine aminotransferase [EC:2.6.1.7]
dark-hl	UPREGULATED	-2.487	1	09100 Metabolism;09105 Amino acid metabolism;00400 Phenylalanine, tyrosine and tryptophan biosynthesis;K00817	K00817	hisC	histidinol-phosphate aminotransferase [EC:2.6.1.9]
dark-hl	UPREGULATED	-2.132	0.999	09100 Metabolism;09105 Amino acid metabolism;00400 Phenylalanine, tyrosine and tryptophan biosynthesis;K01694	K01694	TRP	tryptophan synthase [EC:4.2.1.20]
dark-hl	UPREGULATED	-2.132	0.999	09100 Metabolism;09105 Amino acid metabolism;00400 Phenylalanine, tyrosine and tryptophan biosynthesis;K01695	K01695	trpA	tryptophan synthase alpha chain [EC:4.2.1.20]
dark-hl	UPREGULATED	-2.132	0.999	09100 Metabolism;09105 Amino acid metabolism;00400 Phenylalanine, tyrosine and tryptophan biosynthesis;K01696	K01696	trpB	tryptophan synthase beta chain [EC:4.2.1.20]
dark-hl	UPREGULATED	-2.59	1	09100 Metabolism;09105 Amino acid metabolism;00400 Phenylalanine, tyrosine and tryptophan biosynthesis;K01736	K01736	aroC	chorismate synthase [EC:4.2.3.5]
dark-hl	UPREGULATED	-1.636	0.953	09100 Metabolism;09105 Amino acid metabolism;00400 Phenylalanine, tyrosine and tryptophan biosynthesis;K01850	K01850	E5.4.99.5	chorismate mutase [EC:5.4.99.5]
dark-hl	UPREGULATED	-1.739	0.969	09100 Metabolism;09105 Amino acid metabolism;00400 Phenylalanine, tyrosine and tryptophan biosynthesis;K03786	K03786	aroQ,	3-dehydroquinate dehydratase II [EC:4.2.1.10]
dark-hl	UPREGULATED	-3.435	1	09100 Metabolism;09105 Amino acid metabolism;00400 Phenylalanine, tyrosine and tryptophan biosynthesis;K05359	K05359	ADT,	arogenate/prephenate dehydratase [EC:4.2.1.91 4.2.1.51]
dark-hl	UPREGULATED	-2.765	1	09100 Metabolism;09106 Metabolism of other amino acids;00410 beta-Alanine metabolism;K00128	K00128	ALDH	aldehyde dehydrogenase (NAD+) [EC:1.2.1.3]
dark-hl	UPREGULATED	-2.559	1	09100 Metabolism;09106 Metabolism of other amino acids;00410 beta-Alanine metabolism;K01431	K01431	UPB1,	beta-ureidopropionase [EC:3.5.1.6]
dark-hl	UPREGULATED	-1.641	0.96	09100 Metabolism;09106 Metabolism of other amino acids;00410 beta-Alanine metabolism;K01918	K01918	panC	pantoate--beta-alanine ligase [EC:6.3.2.1]
dark-hl	UPREGULATED	-1.088	0.999	09100 Metabolism;09106 Metabolism of other amino acids;00430 Taurine and hypotaurine metabolism;K03119	K03119	tauD	taurine dioxygenase [EC:1.14.11.17]
dark-hl	UPREGULATED	-2.579	0.999	09100 Metabolism;09106 Metabolism of other amino acids;00440 Phosphonate and phosphinate metabolism;K00993	K00993	EPT1	ethanolaminephosphotransferase [EC:2.7.8.1]
dark-hl	UPREGULATED	-3.435	1	09100 Metabolism;09106 Metabolism of other amino acids;00440 Phosphonate and phosphinate metabolism;K01841	K01841	pepM	phosphoenolpyruvate phosphomutase [EC:5.4.2.9]
dark-hl	UPREGULATED	-2.582	1	09100 Metabolism;09106 Metabolism of other amino acids;00450 Selenocompound metabolism;K00384	K00384	trxB,	thioredoxin reductase (NADPH) [EC:1.8.1.9]
dark-hl	UPREGULATED	-2.474	0.999	09100 Metabolism;09106 Metabolism of other amino acids;00450 Selenocompound metabolism;K00816	K00816	CCBL	kynurenine---oxoglutarate transaminase / cysteine-S-conjugate beta-lyase / glutamine---phenylpyruvate transaminase [EC:2.6.1.7 4.4.1.13 2.6.1.64]
dark-hl	UPREGULATED	-4.325	1	09100 Metabolism;09106 Metabolism of other amino acids;00450 Selenocompound metabolism;K00958	K00958	sat,	sulfate adenylyltransferase [EC:2.7.7.4]
dark-hl	UPREGULATED	-3.132	1	09100 Metabolism;09106 Metabolism of other amino acids;00450 Selenocompound metabolism;K01008	K01008	selD,	selenide, water dikinase [EC:2.7.9.3]
dark-hl	UPREGULATED	-2.596	1	09100 Metabolism;09106 Metabolism of other amino acids;00450 Selenocompound metabolism;K01874	K01874	MARS,	methionyl-tRNA synthetase [EC:6.1.1.10]
dark-hl	UPREGULATED	-2.016	1	09100 Metabolism;09106 Metabolism of other amino acids;00450 Selenocompound metabolism;K03341	K03341	SEPSECS	O-phospho-L-seryl-tRNASec:L-selenocysteinyl-tRNA synthase [EC:2.9.1.2]
dark-hl	UPREGULATED	-1.93	0.987	09100 Metabolism;09106 Metabolism of other amino acids;00450 Selenocompound metabolism;K13811	K13811	PAPSS	3'-phosphoadenosine 5'-phosphosulfate synthase [EC:2.7.7.4 2.7.1.25]
dark-hl	UPREGULATED	-2.521	1	09100 Metabolism;09106 Metabolism of other amino acids;00460 Cyanoamino acid metabolism;K00600	K00600	glyA,	glycine hydroxymethyltransferase [EC:2.1.2.1]
dark-hl	UPREGULATED	-1.739	0.969	09100 Metabolism;09106 Metabolism of other amino acids;00460 Cyanoamino acid metabolism;K05350	K05350	bglB	beta-glucosidase [EC:3.2.1.21]
dark-hl	UPREGULATED	-4.429	1	09100 Metabolism;09106 Metabolism of other amino acids;00470 D-Amino acid metabolism;K01586	K01586	lysA	diaminopimelate decarboxylase [EC:4.1.1.20]
dark-hl	UPREGULATED	-2.404	1	09100 Metabolism;09106 Metabolism of other amino acids;00470 D-Amino acid metabolism;K01778	K01778	dapF	diaminopimelate epimerase [EC:5.1.1.7]
dark-hl	UPREGULATED	-1.459	0.995	09100 Metabolism;09106 Metabolism of other amino acids;00480 Glutathione metabolism;K00033	K00033	PGD,	6-phosphogluconate dehydrogenase [EC:1.1.1.44 1.1.1.343]
dark-hl	UPREGULATED	-4.663	1	09100 Metabolism;09106 Metabolism of other amino acids;00480 Glutathione metabolism;K00432	K00432	gpx,	glutathione peroxidase [EC:1.11.1.9]
dark-hl	UPREGULATED	-4.796	1	09100 Metabolism;09106 Metabolism of other amino acids;00480 Glutathione metabolism;K01255	K01255	CARP,	leucyl aminopeptidase [EC:3.4.11.1]
dark-hl	UPREGULATED	-2.779	1	09100 Metabolism;09106 Metabolism of other amino acids;00480 Glutathione metabolism;K01256	K01256	pepN	aminopeptidase N [EC:3.4.11.2]
dark-hl	UPREGULATED	-3.126	1	09100 Metabolism;09106 Metabolism of other amino acids;00480 Glutathione metabolism;K01469	K01469	OPLAH,	5-oxoprolinase (ATP-hydrolysing) [EC:3.5.2.9]
dark-hl	UPREGULATED	-4.413	1	09100 Metabolism;09106 Metabolism of other amino acids;00480 Glutathione metabolism;K01581	K01581	E4.1.1.17,	ornithine decarboxylase [EC:4.1.1.17]
dark-hl	UPREGULATED	-2.254	1	09100 Metabolism;09106 Metabolism of other amino acids;00480 Glutathione metabolism;K21456	K21456	GSS	glutathione synthase [EC:6.3.2.3]
dark-hl	UPREGULATED	-1.545	0.993	09100 Metabolism;09107 Glycan biosynthesis and metabolism;00510 N-Glycan biosynthesis;K00721	K00721	DPM1	dolichol-phosphate mannosyltransferase [EC:2.4.1.83]
dark-hl	UPREGULATED	-1.866	1	09100 Metabolism;09107 Glycan biosynthesis and metabolism;00510 N-Glycan biosynthesis;K01230	K01230	MAN1A_C,	mannosyl-oligosaccharide alpha-1,2-mannosidase [EC:3.2.1.113]
dark-hl	UPREGULATED	-2.459	0.999	09100 Metabolism;09107 Glycan biosynthesis and metabolism;00510 N-Glycan biosynthesis;K03847	K03847	ALG12	alpha-1,6-mannosyltransferase [EC:2.4.1.260]
dark-hl	UPREGULATED	-3.495	1	09100 Metabolism;09107 Glycan biosynthesis and metabolism;00510 N-Glycan biosynthesis;K07151	K07151	STT3	dolichyl-diphosphooligosaccharide---protein glycosyltransferase [EC:2.4.99.18]
dark-hl	UPREGULATED	-2.017	0.99	09100 Metabolism;09107 Glycan biosynthesis and metabolism;00510 N-Glycan biosynthesis;K12669	K12669	OST3_6	dolichyl-diphosphooligosaccharide---protein glycosyltransferase subunit 3/6
dark-hl	UPREGULATED	-2.474	0.999	09100 Metabolism;09107 Glycan biosynthesis and metabolism;00511 Other glycan degradation;K01191	K01191	MAN2C1	alpha-mannosidase [EC:3.2.1.24]
dark-hl	UPREGULATED	-2.776	1	09100 Metabolism;09107 Glycan biosynthesis and metabolism;00511 Other glycan degradation;K01192	K01192	E3.2.1.25,	beta-mannosidase [EC:3.2.1.25]
dark-hl	UPREGULATED	-3.012	1	09100 Metabolism;09107 Glycan biosynthesis and metabolism;00512 Mucin type O-glycan biosynthesis;K00731	K00731	C1GALT1	glycoprotein-N-acetylgalactosamine 3-beta-galactosyltransferase [EC:2.4.1.122]
dark-hl	UPREGULATED	-2.579	0.999	09100 Metabolism;09107 Glycan biosynthesis and metabolism;00512 Mucin type O-glycan biosynthesis;K03368	K03368	ST3GAL2	beta-galactoside alpha-2,3-sialyltransferase (sialyltransferase 4B) [EC:2.4.3.2 2.4.3.4]
dark-hl	UPREGULATED	-1.866	1	09100 Metabolism;09107 Glycan biosynthesis and metabolism;00513 Various types of N-glycan biosynthesis;K01230	K01230	MAN1A_C,	mannosyl-oligosaccharide alpha-1,2-mannosidase [EC:3.2.1.113]
dark-hl	UPREGULATED	-2.459	0.999	09100 Metabolism;09107 Glycan biosynthesis and metabolism;00513 Various types of N-glycan biosynthesis;K03847	K03847	ALG12	alpha-1,6-mannosyltransferase [EC:2.4.1.260]
dark-hl	UPREGULATED	-3.495	1	09100 Metabolism;09107 Glycan biosynthesis and metabolism;00513 Various types of N-glycan biosynthesis;K07151	K07151	STT3	dolichyl-diphosphooligosaccharide---protein glycosyltransferase [EC:2.4.99.18]
dark-hl	UPREGULATED	-2.017	0.99	09100 Metabolism;09107 Glycan biosynthesis and metabolism;00513 Various types of N-glycan biosynthesis;K12669	K12669	OST3_6	dolichyl-diphosphooligosaccharide---protein glycosyltransferase subunit 3/6
dark-hl	UPREGULATED	-3.012	1	09100 Metabolism;09107 Glycan biosynthesis and metabolism;00514 Other types of O-glycan biosynthesis;K00731	K00731	C1GALT1	glycoprotein-N-acetylgalactosamine 3-beta-galactosyltransferase [EC:2.4.1.122]
dark-hl	UPREGULATED	-1.225	0.963	09100 Metabolism;09107 Glycan biosynthesis and metabolism;00514 Other types of O-glycan biosynthesis;K11703	K11703	GLT25D	collagen beta-1,O-galactosyltransferase [EC:2.4.1.50]
dark-hl	UPREGULATED	-1.837	0.976	09100 Metabolism;09107 Glycan biosynthesis and metabolism;00514 Other types of O-glycan biosynthesis;K13667	K13667	POGLUT1,	EGF-domain serine glucosyl/xylosyltransferase [EC:2.4.1.376 2.4.2.63]
dark-hl	UPREGULATED	-2.238	1	09100 Metabolism;09107 Glycan biosynthesis and metabolism;00514 Other types of O-glycan biosynthesis;K20782	K20782	HPAT	hydroxyproline O-arabinosyltransferase [EC:2.4.2.58]
dark-hl	UPREGULATED	-1.744	1	09100 Metabolism;09107 Glycan biosynthesis and metabolism;00531 Glycosaminoglycan degradation;K01136	K01136	IDS	iduronate 2-sulfatase [EC:3.1.6.13]
dark-hl	UPREGULATED	-2.69	1	09100 Metabolism;09107 Glycan biosynthesis and metabolism;00532 Glycosaminoglycan biosynthesis - chondroitin sulfate / dermatan sulfate;K00734	K00734	B3GALT6	galactosylxylosylprotein 3-beta-galactosyltransferase [EC:2.4.1.134]
dark-hl	UPREGULATED	-2.242	1	09100 Metabolism;09107 Glycan biosynthesis and metabolism;00532 Glycosaminoglycan biosynthesis - chondroitin sulfate / dermatan sulfate;K03193	K03193	UST	dermatan/chondrotin sulfate uronyl 2-O-sulfotransferase UST [EC:2.8.2.-]
dark-hl	UPREGULATED	-1.505	0.967	09100 Metabolism;09107 Glycan biosynthesis and metabolism;00532 Glycosaminoglycan biosynthesis - chondroitin sulfate / dermatan sulfate;K07779	K07779	CHST13	chondroitin 4-sulfotransferase 13 [EC:2.8.2.5]
dark-hl	UPREGULATED	-1.505	0.967	09100 Metabolism;09107 Glycan biosynthesis and metabolism;00532 Glycosaminoglycan biosynthesis - chondroitin sulfate / dermatan sulfate;K08105	K08105	D4ST1	dermatan 4-sulfotransferase 1 [EC:2.8.2.35]
dark-hl	UPREGULATED	-2.579	0.999	09100 Metabolism;09107 Glycan biosynthesis and metabolism;00533 Glycosaminoglycan biosynthesis - keratan sulfate;K03368	K03368	ST3GAL2	beta-galactoside alpha-2,3-sialyltransferase (sialyltransferase 4B) [EC:2.4.3.2 2.4.3.4]
dark-hl	UPREGULATED	-2.69	1	09100 Metabolism;09107 Glycan biosynthesis and metabolism;00534 Glycosaminoglycan biosynthesis - heparan sulfate / heparin;K00734	K00734	B3GALT6	galactosylxylosylprotein 3-beta-galactosyltransferase [EC:2.4.1.134]
dark-hl	UPREGULATED	-2.242	1	09100 Metabolism;09107 Glycan biosynthesis and metabolism;00534 Glycosaminoglycan biosynthesis - heparan sulfate / heparin;K02513	K02513	HS2ST1	heparan sulfate 2-O-sulfotransferase HS2ST1 [EC:2.8.2.-]
dark-hl	UPREGULATED	-3.105	1	09100 Metabolism;09107 Glycan biosynthesis and metabolism;00541 O-Antigen nucleotide sugar biosynthesis;K00963	K00963	UGP2,	UTP--glucose-1-phosphate uridylyltransferase [EC:2.7.7.9]
dark-hl	UPREGULATED	-2.017	0.99	09100 Metabolism;09107 Glycan biosynthesis and metabolism;00541 O-Antigen nucleotide sugar biosynthesis;K01711	K01711	gmd,	GDPmannose 4,6-dehydratase [EC:4.2.1.47]
dark-hl	UPREGULATED	-1.51	0.99	09100 Metabolism;09107 Glycan biosynthesis and metabolism;00541 O-Antigen nucleotide sugar biosynthesis;K02377	K02377	TSTA3,	GDP-L-fucose synthase [EC:1.1.1.271]
dark-hl	UPREGULATED	-2.101	1	09100 Metabolism;09107 Glycan biosynthesis and metabolism;00541 O-Antigen nucleotide sugar biosynthesis;K08679	K08679	GAE,	UDP-glucuronate 4-epimerase [EC:5.1.3.6]
dark-hl	UPREGULATED	-2.624	1	09100 Metabolism;09107 Glycan biosynthesis and metabolism;00550 Peptidoglycan biosynthesis;K01000	K01000	mraY	phospho-N-acetylmuramoyl-pentapeptide-transferase [EC:2.7.8.13]
dark-hl	UPREGULATED	-2.4	1	09100 Metabolism;09107 Glycan biosynthesis and metabolism;00563 Glycosylphosphatidylinositol (GPI)-anchor biosynthesis;K05288	K05288	PIGO	GPI ethanolamine phosphate transferase 3 subunit O [EC:2.7.-.-]
dark-hl	UPREGULATED	-1.743	0.974	09100 Metabolism;09107 Glycan biosynthesis and metabolism;00563 Glycosylphosphatidylinositol (GPI)-anchor biosynthesis;K05291	K05291	PIGS	GPI-anchor transamidase subunit S
dark-hl	UPREGULATED	-2.579	0.999	09100 Metabolism;09107 Glycan biosynthesis and metabolism;00603 Glycosphingolipid biosynthesis - globo and isoglobo series;K03368	K03368	ST3GAL2	beta-galactoside alpha-2,3-sialyltransferase (sialyltransferase 4B) [EC:2.4.3.2 2.4.3.4]
dark-hl	UPREGULATED	-2.579	0.999	09100 Metabolism;09107 Glycan biosynthesis and metabolism;00604 Glycosphingolipid biosynthesis - ganglio series;K03368	K03368	ST3GAL2	beta-galactoside alpha-2,3-sialyltransferase (sialyltransferase 4B) [EC:2.4.3.2 2.4.3.4]
dark-hl	UPREGULATED	-4.783	1	09100 Metabolism;09108 Metabolism of cofactors and vitamins;00130 Ubiquinone and other terpenoid-quinone biosynthesis;K05928	K05928	E2.1.1.95	tocopherol O-methyltransferase [EC:2.1.1.95]
dark-hl	UPREGULATED	-1.792	0.984	09100 Metabolism;09108 Metabolism of cofactors and vitamins;00130 Ubiquinone and other terpenoid-quinone biosynthesis;K06127	K06127	COQ5	2-methoxy-6-polyprenyl-1,4-benzoquinol methylase [EC:2.1.1.201]
dark-hl	UPREGULATED	-2.459	0.999	09100 Metabolism;09108 Metabolism of cofactors and vitamins;00130 Ubiquinone and other terpenoid-quinone biosynthesis;K09833	K09833	HPT,	homogentisate phytyltransferase / homogentisate geranylgeranyltransferase [EC:2.5.1.115 2.5.1.116]
dark-hl	UPREGULATED	-1.853	1	09100 Metabolism;09108 Metabolism of cofactors and vitamins;00130 Ubiquinone and other terpenoid-quinone biosynthesis;K12502	K12502	VTE3,	MPBQ/MSBQ methyltransferase [EC:2.1.1.295]
dark-hl	UPREGULATED	-2.839	1	09100 Metabolism;09108 Metabolism of cofactors and vitamins;00130 Ubiquinone and other terpenoid-quinone biosynthesis;K17872	K17872	NDC1,	demethylphylloquinone reductase [EC:1.6.5.12]
dark-hl	UPREGULATED	-4.783	1	09100 Metabolism;09108 Metabolism of cofactors and vitamins;00130 Ubiquinone and other terpenoid-quinone biosynthesis;K18534	K18534	K18534	MPBQ/MSBQ methyltransferase [EC:2.1.1.295]
dark-hl	UPREGULATED	-2.308	1	09100 Metabolism;09108 Metabolism of cofactors and vitamins;00670 One carbon pool by folate;K00297	K00297	metF,	methylenetetrahydrofolate reductase (NADH) [EC:1.5.1.54]
dark-hl	UPREGULATED	-2.521	1	09100 Metabolism;09108 Metabolism of cofactors and vitamins;00670 One carbon pool by folate;K00600	K00600	glyA,	glycine hydroxymethyltransferase [EC:2.1.2.1]
dark-hl	UPREGULATED	-2.297	1	09100 Metabolism;09108 Metabolism of cofactors and vitamins;00670 One carbon pool by folate;K00602	K00602	purH	phosphoribosylaminoimidazolecarboxamide formyltransferase / IMP cyclohydrolase [EC:2.1.2.3 3.5.4.10]
dark-hl	UPREGULATED	-3.435	1	09100 Metabolism;09108 Metabolism of cofactors and vitamins;00670 One carbon pool by folate;K00605	K00605	gcvT,	glycine cleavage system T protein (aminomethyltransferase) [EC:2.1.2.10]
dark-hl	UPREGULATED	-2.839	1	09100 Metabolism;09108 Metabolism of cofactors and vitamins;00730 Thiamine metabolism;K01662	K01662	dxs	1-deoxy-D-xylulose-5-phosphate synthase [EC:2.2.1.7]
dark-hl	UPREGULATED	-2.221	1	09100 Metabolism;09108 Metabolism of cofactors and vitamins;00740 Riboflavin metabolism;K00793	K00793	ribE,	riboflavin synthase [EC:2.5.1.9]
dark-hl	UPREGULATED	-2.499	1	09100 Metabolism;09108 Metabolism of cofactors and vitamins;00740 Riboflavin metabolism;K00794	K00794	ribH,	6,7-dimethyl-8-ribityllumazine synthase [EC:2.5.1.78]
dark-hl	UPREGULATED	-2.394	0.999	09100 Metabolism;09108 Metabolism of cofactors and vitamins;00740 Riboflavin metabolism;K00861	K00861	RFK,	riboflavin kinase [EC:2.7.1.26]
dark-hl	UPREGULATED	-2.915	1	09100 Metabolism;09108 Metabolism of cofactors and vitamins;00740 Riboflavin metabolism;K02858	K02858	ribB,	3,4-dihydroxy 2-butanone 4-phosphate synthase [EC:4.1.99.12]
dark-hl	UPREGULATED	-2.915	1	09100 Metabolism;09108 Metabolism of cofactors and vitamins;00740 Riboflavin metabolism;K14652	K14652	ribBA	3,4-dihydroxy 2-butanone 4-phosphate synthase / GTP cyclohydrolase II [EC:4.1.99.12 3.5.4.25]
dark-hl	UPREGULATED	-2.394	0.999	09100 Metabolism;09108 Metabolism of cofactors and vitamins;00740 Riboflavin metabolism;K20884	K20884	FHY	riboflavin kinase / FMN hydrolase [EC:2.7.1.26 3.1.3.102]
dark-hl	UPREGULATED	-2.736	1	09100 Metabolism;09108 Metabolism of cofactors and vitamins;00750 Vitamin B6 metabolism;K00831	K00831	serC,	phosphoserine aminotransferase [EC:2.6.1.52]
dark-hl	UPREGULATED	-5.258	1	09100 Metabolism;09108 Metabolism of cofactors and vitamins;00750 Vitamin B6 metabolism;K06215	K06215	pdxS,	pyridoxal 5'-phosphate synthase pdxS subunit [EC:4.3.3.6]
dark-hl	UPREGULATED	-5.258	1	09100 Metabolism;09108 Metabolism of cofactors and vitamins;00750 Vitamin B6 metabolism;K08681	K08681	pdxT,	pyridoxal 5'-phosphate synthase pdxT subunit [EC:4.3.3.6]
dark-hl	UPREGULATED	-2.757	1	09100 Metabolism;09108 Metabolism of cofactors and vitamins;00760 Nicotinate and nicotinamide metabolism;K06210	K06210	NMNAT	nicotinamide mononucleotide adenylyltransferase [EC:2.7.7.1 2.7.7.18]
dark-hl	UPREGULATED	-2.765	1	09100 Metabolism;09108 Metabolism of cofactors and vitamins;00770 Pantothenate and CoA biosynthesis;K00128	K00128	ALDH	aldehyde dehydrogenase (NAD+) [EC:1.2.1.3]
dark-hl	UPREGULATED	-1.641	0.96	09100 Metabolism;09108 Metabolism of cofactors and vitamins;00770 Pantothenate and CoA biosynthesis;K00606	K00606	panB	3-methyl-2-oxobutanoate hydroxymethyltransferase [EC:2.1.2.11]
dark-hl	UPREGULATED	-3.224	1	09100 Metabolism;09108 Metabolism of cofactors and vitamins;00770 Pantothenate and CoA biosynthesis;K00826	K00826	E2.6.1.42,	branched-chain amino acid aminotransferase [EC:2.6.1.42]
dark-hl	UPREGULATED	-2.559	1	09100 Metabolism;09108 Metabolism of cofactors and vitamins;00770 Pantothenate and CoA biosynthesis;K01431	K01431	UPB1,	beta-ureidopropionase [EC:3.5.1.6]
dark-hl	UPREGULATED	-1.641	0.96	09100 Metabolism;09108 Metabolism of cofactors and vitamins;00770 Pantothenate and CoA biosynthesis;K01918	K01918	panC	pantoate--beta-alanine ligase [EC:6.3.2.1]
dark-hl	UPREGULATED	-1.636	0.953	09100 Metabolism;09108 Metabolism of cofactors and vitamins;00770 Pantothenate and CoA biosynthesis;K06133	K06133	LYS5,	4'-phosphopantetheinyl transferase [EC:2.7.8.-]
dark-hl	UPREGULATED	-1.66	0.979	09100 Metabolism;09108 Metabolism of cofactors and vitamins;00780 Biotin metabolism;K00059	K00059	fabG,	3-oxoacyl-[acyl-carrier protein] reductase [EC:1.1.1.100]
dark-hl	UPREGULATED	-2.209	1	09100 Metabolism;09108 Metabolism of cofactors and vitamins;00780 Biotin metabolism;K09458	K09458	fabF,	3-oxoacyl-[acyl-carrier-protein] synthase II [EC:2.3.1.179]
dark-hl	UPREGULATED	-2.776	1	09100 Metabolism;09108 Metabolism of cofactors and vitamins;00785 Lipoic acid metabolism;K00161	K00161	PDHA,	pyruvate dehydrogenase E1 component subunit alpha [EC:1.2.4.1]
dark-hl	UPREGULATED	-3.162	1	09100 Metabolism;09108 Metabolism of cofactors and vitamins;00785 Lipoic acid metabolism;K00162	K00162	PDHB,	pyruvate dehydrogenase E1 component subunit beta [EC:1.2.4.1]
dark-hl	UPREGULATED	-1.66	0.979	09100 Metabolism;09108 Metabolism of cofactors and vitamins;00785 Lipoic acid metabolism;K00167	K00167	BCKDHB,	2-oxoisovalerate dehydrogenase E1 component subunit beta [EC:1.2.4.4]
dark-hl	UPREGULATED	-2.625	1	09100 Metabolism;09108 Metabolism of cofactors and vitamins;00785 Lipoic acid metabolism;K00382	K00382	DLD,	dihydrolipoyl dehydrogenase [EC:1.8.1.4]
dark-hl	UPREGULATED	-3.435	1	09100 Metabolism;09108 Metabolism of cofactors and vitamins;00785 Lipoic acid metabolism;K00605	K00605	gcvT,	glycine cleavage system T protein (aminomethyltransferase) [EC:2.1.2.10]
dark-hl	UPREGULATED	-1.84	0.987	09100 Metabolism;09108 Metabolism of cofactors and vitamins;00785 Lipoic acid metabolism;K00627	K00627	DLAT,	pyruvate dehydrogenase E2 component (dihydrolipoyllysine-residue acetyltransferase) [EC:2.3.1.12]
dark-hl	UPREGULATED	-2.33	1	09100 Metabolism;09108 Metabolism of cofactors and vitamins;00785 Lipoic acid metabolism;K03644	K03644	lipA,	lipoyl synthase [EC:2.8.1.8]
dark-hl	UPREGULATED	-2.915	1	09100 Metabolism;09108 Metabolism of cofactors and vitamins;00790 Folate biosynthesis;K14652	K14652	ribBA	3,4-dihydroxy 2-butanone 4-phosphate synthase / GTP cyclohydrolase II [EC:4.1.99.12 3.5.4.25]
dark-hl	UPREGULATED	-2.124	1	09100 Metabolism;09108 Metabolism of cofactors and vitamins;00860 Porphyrin metabolism;K00218	K00218	por	protochlorophyllide reductase [EC:1.3.1.33]
dark-hl	UPREGULATED	-1.347	0.992	09100 Metabolism;09108 Metabolism of cofactors and vitamins;00860 Porphyrin metabolism;K01599	K01599	hemE,	uroporphyrinogen decarboxylase [EC:4.1.1.37]
dark-hl	UPREGULATED	-1.833	1	09100 Metabolism;09108 Metabolism of cofactors and vitamins;00860 Porphyrin metabolism;K01698	K01698	hemB,	porphobilinogen synthase [EC:4.2.1.24]
dark-hl	UPREGULATED	-2.659	1	09100 Metabolism;09108 Metabolism of cofactors and vitamins;00860 Porphyrin metabolism;K01885	K01885	EARS,	glutamyl-tRNA synthetase [EC:6.1.1.17]
dark-hl	UPREGULATED	-2.625	1	09100 Metabolism;09108 Metabolism of cofactors and vitamins;00860 Porphyrin metabolism;K02303	K02303	cobA	uroporphyrin-III C-methyltransferase [EC:2.1.1.107]
dark-hl	UPREGULATED	-2.726	1	09100 Metabolism;09108 Metabolism of cofactors and vitamins;00860 Porphyrin metabolism;K02492	K02492	hemA	glutamyl-tRNA reductase [EC:1.2.1.70]
dark-hl	UPREGULATED	-2.624	1	09100 Metabolism;09108 Metabolism of cofactors and vitamins;00860 Porphyrin metabolism;K03403	K03403	chlH,	magnesium chelatase subunit H [EC:6.6.1.1]
dark-hl	UPREGULATED	-1.587	0.993	09100 Metabolism;09108 Metabolism of cofactors and vitamins;00860 Porphyrin metabolism;K03428	K03428	bchM,	magnesium-protoporphyrin O-methyltransferase [EC:2.1.1.11]
dark-hl	UPREGULATED	-1.143	1	09100 Metabolism;09108 Metabolism of cofactors and vitamins;00860 Porphyrin metabolism;K10960	K10960	chlP,	geranylgeranyl diphosphate/geranylgeranyl-bacteriochlorophyllide a reductase [EC:1.3.1.83 1.3.1.111]
dark-hl	UPREGULATED	-1.84	0.987	09100 Metabolism;09108 Metabolism of cofactors and vitamins;00860 Porphyrin metabolism;K14163	K14163	EPRS	bifunctional glutamyl/prolyl-tRNA synthetase [EC:6.1.1.17 6.1.1.15]
dark-hl	UPREGULATED	-1.434	1	09100 Metabolism;09108 Metabolism of cofactors and vitamins;00860 Porphyrin metabolism;K21480	K21480	HO,	heme oxygenase (biliverdin-producing, ferredoxin) [EC:1.14.15.20]
dark-hl	UPREGULATED	-1.819	1	09100 Metabolism;09109 Metabolism of terpenoids and polyketides;00900 Terpenoid backbone biosynthesis;K00099	K00099	dxr	1-deoxy-D-xylulose-5-phosphate reductoisomerase [EC:1.1.1.267]
dark-hl	UPREGULATED	-2.839	1	09100 Metabolism;09109 Metabolism of terpenoids and polyketides;00900 Terpenoid backbone biosynthesis;K01662	K01662	dxs	1-deoxy-D-xylulose-5-phosphate synthase [EC:2.2.1.7]
dark-hl	UPREGULATED	-2.254	1	09100 Metabolism;09109 Metabolism of terpenoids and polyketides;00900 Terpenoid backbone biosynthesis;K05355	K05355	hexPS,	hexaprenyl-diphosphate synthase [EC:2.5.1.82 2.5.1.83]
dark-hl	UPREGULATED	-1.143	1	09100 Metabolism;09109 Metabolism of terpenoids and polyketides;00900 Terpenoid backbone biosynthesis;K10960	K10960	chlP,	geranylgeranyl diphosphate/geranylgeranyl-bacteriochlorophyllide a reductase [EC:1.3.1.83 1.3.1.111]
dark-hl	UPREGULATED	-2.254	1	09100 Metabolism;09109 Metabolism of terpenoids and polyketides;00900 Terpenoid backbone biosynthesis;K12505	K12505	PDSS2	decaprenyl-diphosphate synthase subunit 2 [EC:2.5.1.91]
dark-hl	UPREGULATED	-2.277	1	09100 Metabolism;09109 Metabolism of terpenoids and polyketides;00900 Terpenoid backbone biosynthesis;K14066	K14066	GPS	geranyl diphosphate synthase [EC:2.5.1.1]
dark-hl	UPREGULATED	-2.765	1	09100 Metabolism;09109 Metabolism of terpenoids and polyketides;00903 Limonene degradation;K00128	K00128	ALDH	aldehyde dehydrogenase (NAD+) [EC:1.2.1.3]
dark-hl	UPREGULATED	-3.658	1	09100 Metabolism;09109 Metabolism of terpenoids and polyketides;00904 Diterpenoid biosynthesis;K05282	K05282	GA20ox	gibberellin-44 dioxygenase [EC:1.14.11.12]
dark-hl	UPREGULATED	-4.56	1	09100 Metabolism;09109 Metabolism of terpenoids and polyketides;00906 Carotenoid biosynthesis;K15744	K15744	Z-ISO	zeta-carotene isomerase [EC:5.2.1.12]
dark-hl	UPREGULATED	-1.457	1	09100 Metabolism;09109 Metabolism of terpenoids and polyketides;00908 Zeatin biosynthesis;K00791	K00791	miaA,	tRNA dimethylallyltransferase [EC:2.5.1.75]
dark-hl	UPREGULATED	-2.839	1	09100 Metabolism;09109 Metabolism of terpenoids and polyketides;00909 Sesquiterpenoid and triterpenoid biosynthesis;K00801	K00801	FDFT1	farnesyl-diphosphate farnesyltransferase [EC:2.5.1.21]
dark-hl	UPREGULATED	-2.765	1	09100 Metabolism;09109 Metabolism of terpenoids and polyketides;00981 Insect hormone biosynthesis;K00128	K00128	ALDH	aldehyde dehydrogenase (NAD+) [EC:1.2.1.3]
dark-hl	UPREGULATED	-2.839	1	09100 Metabolism;09109 Metabolism of terpenoids and polyketides;01051 Biosynthesis of ansamycins;K00615	K00615	E2.2.1.1,	transketolase [EC:2.2.1.1]
dark-hl	UPREGULATED	-2.393	1	09100 Metabolism;09110 Biosynthesis of other secondary metabolites;00254 Aflatoxin biosynthesis;K11262	K11262	ACACA	acetyl-CoA carboxylase / biotin carboxylase 1 [EC:6.4.1.2 6.3.4.14 2.1.3.15]
dark-hl	UPREGULATED	-3.188	1	09100 Metabolism;09110 Biosynthesis of other secondary metabolites;00261 Monobactam biosynthesis;K00133	K00133	asd	aspartate-semialdehyde dehydrogenase [EC:1.2.1.11]
dark-hl	UPREGULATED	-2.627	1	09100 Metabolism;09110 Biosynthesis of other secondary metabolites;00261 Monobactam biosynthesis;K00215	K00215	dapB	4-hydroxy-tetrahydrodipicolinate reductase [EC:1.17.1.8]
dark-hl	UPREGULATED	-4.325	1	09100 Metabolism;09110 Biosynthesis of other secondary metabolites;00261 Monobactam biosynthesis;K00958	K00958	sat,	sulfate adenylyltransferase [EC:2.7.7.4]
dark-hl	UPREGULATED	-2.459	0.999	09100 Metabolism;09110 Biosynthesis of other secondary metabolites;00261 Monobactam biosynthesis;K01714	K01714	dapA	4-hydroxy-tetrahydrodipicolinate synthase [EC:4.3.3.7]
dark-hl	UPREGULATED	-2.353	0.999	09100 Metabolism;09110 Biosynthesis of other secondary metabolites;00261 Monobactam biosynthesis;K12524	K12524	thrA	bifunctional aspartokinase / homoserine dehydrogenase 1 [EC:2.7.2.4 1.1.1.3]
dark-hl	UPREGULATED	-1.93	0.987	09100 Metabolism;09110 Biosynthesis of other secondary metabolites;00261 Monobactam biosynthesis;K13811	K13811	PAPSS	3'-phosphoadenosine 5'-phosphosulfate synthase [EC:2.7.7.4 2.7.1.25]
dark-hl	UPREGULATED	-1.84	0.987	09100 Metabolism;09110 Biosynthesis of other secondary metabolites;00311 Penicillin and cephalosporin biosynthesis;K19200	K19200	IAL	isopenicillin-N N-acyltransferase like protein
dark-hl	UPREGULATED	-1.66	0.979	09100 Metabolism;09110 Biosynthesis of other secondary metabolites;00333 Prodigiosin biosynthesis;K00059	K00059	fabG,	3-oxoacyl-[acyl-carrier protein] reductase [EC:1.1.1.100]
dark-hl	UPREGULATED	-2.487	1	09100 Metabolism;09110 Biosynthesis of other secondary metabolites;00401 Novobiocin biosynthesis;K00817	K00817	hisC	histidinol-phosphate aminotransferase [EC:2.6.1.9]
dark-hl	UPREGULATED	-2.132	0.999	09100 Metabolism;09110 Biosynthesis of other secondary metabolites;00402 Benzoxazinoid biosynthesis;K13222	K13222	BX1,	indole-3-glycerol-phosphate lyase [EC:4.1.2.8]
dark-hl	UPREGULATED	-2.811	1	09100 Metabolism;09110 Biosynthesis of other secondary metabolites;00521 Streptomycin biosynthesis;K01092	K01092	E3.1.3.25,	myo-inositol-1(or 4)-monophosphatase [EC:3.1.3.25]
dark-hl	UPREGULATED	-3.917	1	09100 Metabolism;09110 Biosynthesis of other secondary metabolites;00521 Streptomycin biosynthesis;K01835	K01835	pgm	phosphoglucomutase [EC:5.4.2.2]
dark-hl	UPREGULATED	-2.871	1	09100 Metabolism;09110 Biosynthesis of other secondary metabolites;00521 Streptomycin biosynthesis;K01858	K01858	INO1,	myo-inositol-1-phosphate synthase [EC:5.5.1.4]
dark-hl	UPREGULATED	-1.739	0.969	09100 Metabolism;09110 Biosynthesis of other secondary metabolites;00940 Phenylpropanoid biosynthesis;K00588	K00588	E2.1.1.104	caffeoyl-CoA O-methyltransferase [EC:2.1.1.104]
dark-hl	UPREGULATED	-1.739	0.969	09100 Metabolism;09110 Biosynthesis of other secondary metabolites;00940 Phenylpropanoid biosynthesis;K13067	K13067	ATTSM1	putative caffeoyl-CoA 3-O-methyltransferase [EC:2.1.1.-]
dark-hl	UPREGULATED	-1.739	0.969	09100 Metabolism;09110 Biosynthesis of other secondary metabolites;00941 Flavonoid biosynthesis;K00588	K00588	E2.1.1.104	caffeoyl-CoA O-methyltransferase [EC:2.1.1.104]
dark-hl	UPREGULATED	-1.739	0.969	09100 Metabolism;09110 Biosynthesis of other secondary metabolites;00944 Flavone and flavonol biosynthesis;K13272	K13272	AOMT,	flavonoid O-methyltransferase [EC:2.1.1.267]
dark-hl	UPREGULATED	-1.739	0.969	09100 Metabolism;09110 Biosynthesis of other secondary metabolites;00945 Stilbenoid, diarylheptanoid and gingerol biosynthesis;K00588	K00588	E2.1.1.104	caffeoyl-CoA O-methyltransferase [EC:2.1.1.104]
dark-hl	UPREGULATED	-1.739	0.969	09100 Metabolism;09110 Biosynthesis of other secondary metabolites;00946 Degradation of flavonoids;K05350	K05350	bglB	beta-glucosidase [EC:3.2.1.21]
dark-hl	UPREGULATED	-2.352	1	09100 Metabolism;09110 Biosynthesis of other secondary metabolites;00950 Isoquinoline alkaloid biosynthesis;K00505	K00505	TYR	tyrosinase [EC:1.14.18.1]
dark-hl	UPREGULATED	-1.739	0.969	09100 Metabolism;09110 Biosynthesis of other secondary metabolites;00950 Isoquinoline alkaloid biosynthesis;K21311	K21311	N4OMT	norbelladine O-methyltransferase [EC:2.1.1.336]
dark-hl	UPREGULATED	-2.487	1	09100 Metabolism;09110 Biosynthesis of other secondary metabolites;00960 Tropane, piperidine and pyridine alkaloid biosynthesis;K00817	K00817	hisC	histidinol-phosphate aminotransferase [EC:2.6.1.9]
dark-hl	UPREGULATED	-3.224	1	09100 Metabolism;09110 Biosynthesis of other secondary metabolites;00966 Glucosinolate biosynthesis;K00826	K00826	E2.6.1.42,	branched-chain amino acid aminotransferase [EC:2.6.1.42]
dark-hl	UPREGULATED	-3.435	1	09100 Metabolism;09110 Biosynthesis of other secondary metabolites;00998 Biosynthesis of various antibiotics;K01841	K01841	pepM	phosphoenolpyruvate phosphomutase [EC:5.4.2.9]
dark-hl	UPREGULATED	-5.09	1	09100 Metabolism;09110 Biosynthesis of other secondary metabolites;00999 Biosynthesis of various plant secondary metabolites;K00789	K00789	metK,	S-adenosylmethionine synthetase [EC:2.5.1.6]
dark-hl	UPREGULATED	-1.739	0.969	09100 Metabolism;09110 Biosynthesis of other secondary metabolites;00999 Biosynthesis of various plant secondary metabolites;K05350	K05350	bglB	beta-glucosidase [EC:3.2.1.21]
dark-hl	UPREGULATED	-2.132	0.999	09100 Metabolism;09110 Biosynthesis of other secondary metabolites;00999 Biosynthesis of various plant secondary metabolites;K13222	K13222	BX1,	indole-3-glycerol-phosphate lyase [EC:4.1.2.8]
dark-hl	UPREGULATED	-2.765	1	09100 Metabolism;09111 Xenobiotics biodegradation and metabolism;00625 Chloroalkane and chloroalkene degradation;K00128	K00128	ALDH	aldehyde dehydrogenase (NAD+) [EC:1.2.1.3]
dark-hl	UPREGULATED	-1.365	1	09100 Metabolism;09111 Xenobiotics biodegradation and metabolism;00983 Drug metabolism - other enzymes;K00088	K00088	IMPDH,	IMP dehydrogenase [EC:1.1.1.205]
dark-hl	UPREGULATED	-1.823	0.994	09100 Metabolism;09111 Xenobiotics biodegradation and metabolism;00983 Drug metabolism - other enzymes;K00940	K00940	ndk,	nucleoside-diphosphate kinase [EC:2.7.4.6]
dark-hl	UPREGULATED	-2.559	1	09100 Metabolism;09111 Xenobiotics biodegradation and metabolism;00983 Drug metabolism - other enzymes;K01431	K01431	UPB1,	beta-ureidopropionase [EC:3.5.1.6]
dark-hl	UPREGULATED	-2.839	1	09100 Metabolism;09111 Xenobiotics biodegradation and metabolism;00983 Drug metabolism - other enzymes;K01520	K01520	dut,	dUTP diphosphatase [EC:3.6.1.23]
dark-hl	UPREGULATED	-2.754	1	09100 Metabolism;09111 Xenobiotics biodegradation and metabolism;00983 Drug metabolism - other enzymes;K01951	K01951	guaA,	GMP synthase (glutamine-hydrolysing) [EC:6.3.5.2]
dark-hl	UPREGULATED	-4.347	1	09100 Metabolism;09111 Xenobiotics biodegradation and metabolism;00983 Drug metabolism - other enzymes;K03927	K03927	CES2	carboxylesterase 2 [EC:3.1.1.1 3.1.1.84 3.1.1.56]
dark-hl	UPREGULATED	-2.044	0.999	09120 Genetic Information Processing;09121 Transcription;03020 RNA polymerase;K03002	K03002	RPA2,	DNA-directed RNA polymerase I subunit RPA2 [EC:2.7.7.6]
dark-hl	UPREGULATED	-1.446	0.988	09120 Genetic Information Processing;09121 Transcription;03020 RNA polymerase;K03006	K03006	RPB1,	DNA-directed RNA polymerase II subunit RPB1 [EC:2.7.7.6]
dark-hl	UPREGULATED	-4.796	1	09120 Genetic Information Processing;09121 Transcription;03020 RNA polymerase;K03010	K03010	RPB2,	DNA-directed RNA polymerase II subunit RPB2 [EC:2.7.7.6]
dark-hl	UPREGULATED	-1.47	1	09120 Genetic Information Processing;09121 Transcription;03020 RNA polymerase;K03013	K03013	RPABC1,	DNA-directed RNA polymerases I, II, and III subunit RPABC1
dark-hl	UPREGULATED	-2.501	1	09120 Genetic Information Processing;09121 Transcription;03020 RNA polymerase;K03014	K03014	RPABC2,	DNA-directed RNA polymerases I, II, and III subunit RPABC2
dark-hl	UPREGULATED	-3.02	1	09120 Genetic Information Processing;09121 Transcription;03020 RNA polymerase;K03015	K03015	RPB7,	DNA-directed RNA polymerase II subunit RPB7
dark-hl	UPREGULATED	-2.074	1	09120 Genetic Information Processing;09121 Transcription;03020 RNA polymerase;K03016	K03016	RPABC3,	DNA-directed RNA polymerases I, II, and III subunit RPABC3
dark-hl	UPREGULATED	-1.145	0.97	09120 Genetic Information Processing;09121 Transcription;03020 RNA polymerase;K03017	K03017	RPB9,	DNA-directed RNA polymerase II subunit RPB9
dark-hl	UPREGULATED	-1.93	0.987	09120 Genetic Information Processing;09121 Transcription;03020 RNA polymerase;K03019	K03019	RPC11,	DNA-directed RNA polymerase III subunit RPC11
dark-hl	UPREGULATED	-1.84	0.987	09120 Genetic Information Processing;09121 Transcription;03020 RNA polymerase;K03027	K03027	RPAC1,	DNA-directed RNA polymerases I and III subunit RPAC1
dark-hl	UPREGULATED	-2.809	1	09120 Genetic Information Processing;09121 Transcription;03022 Basal transcription factors;K03124	K03124	TFIIB,	transcription initiation factor TFIIB
dark-hl	UPREGULATED	-1.786	0.972	09120 Genetic Information Processing;09121 Transcription;03022 Basal transcription factors;K03127	K03127	TAF13	transcription initiation factor TFIID subunit 13
dark-hl	UPREGULATED	-1.948	1	09120 Genetic Information Processing;09121 Transcription;03022 Basal transcription factors;K03132	K03132	TAF7	transcription initiation factor TFIID subunit 7
dark-hl	UPREGULATED	-1.819	1	09120 Genetic Information Processing;09121 Transcription;03022 Basal transcription factors;K14651	K14651	TAF15,	transcription initiation factor TFIID subunit 15
dark-hl	UPREGULATED	-2.359	1	09120 Genetic Information Processing;09121 Transcription;03040 Spliceosome;K03283	K03283	HSPA1_6_8	heat shock 70kDa protein 1/6/8
dark-hl	UPREGULATED	-1.317	0.993	09120 Genetic Information Processing;09121 Transcription;03040 Spliceosome;K06063	K06063	SNW1,	SNW domain-containing protein 1
dark-hl	UPREGULATED	-3.98	1	09120 Genetic Information Processing;09121 Transcription;03040 Spliceosome;K10599	K10599	PRPF19,	pre-mRNA-processing factor 19 [EC:2.3.2.27]
dark-hl	UPREGULATED	-1.85	1	09120 Genetic Information Processing;09121 Transcription;03040 Spliceosome;K11086	K11086	SNRPB,	small nuclear ribonucleoprotein B and B'
dark-hl	UPREGULATED	-2.352	1	09120 Genetic Information Processing;09121 Transcription;03040 Spliceosome;K11087	K11087	SNRPD1,	small nuclear ribonucleoprotein D1
dark-hl	UPREGULATED	-2.003	1	09120 Genetic Information Processing;09121 Transcription;03040 Spliceosome;K11088	K11088	SNRPD3,	small nuclear ribonucleoprotein D3
dark-hl	UPREGULATED	-1.812	1	09120 Genetic Information Processing;09121 Transcription;03040 Spliceosome;K11091	K11091	SNRPA	U1 small nuclear ribonucleoprotein A
dark-hl	UPREGULATED	-2.128	1	09120 Genetic Information Processing;09121 Transcription;03040 Spliceosome;K11092	K11092	SNRPA1	U2 small nuclear ribonucleoprotein A'
dark-hl	UPREGULATED	-1.812	1	09120 Genetic Information Processing;09121 Transcription;03040 Spliceosome;K11094	K11094	SNRPB2	U2 small nuclear ribonucleoprotein B''
dark-hl	UPREGULATED	-2.49	1	09120 Genetic Information Processing;09121 Transcription;03040 Spliceosome;K11096	K11096	SNRPD2,	small nuclear ribonucleoprotein D2
dark-hl	UPREGULATED	-2.006	1	09120 Genetic Information Processing;09121 Transcription;03040 Spliceosome;K11097	K11097	SNRPE,	small nuclear ribonucleoprotein E
dark-hl	UPREGULATED	-2.39	1	09120 Genetic Information Processing;09121 Transcription;03040 Spliceosome;K11098	K11098	SNRPF,	small nuclear ribonucleoprotein F
dark-hl	UPREGULATED	-2.984	1	09120 Genetic Information Processing;09121 Transcription;03040 Spliceosome;K11099	K11099	SNRPG,	small nuclear ribonucleoprotein G
dark-hl	UPREGULATED	-2.006	0.996	09120 Genetic Information Processing;09121 Transcription;03040 Spliceosome;K12621	K12621	LSM2	U6 snRNA-associated Sm-like protein LSm2
dark-hl	UPREGULATED	-3.707	1	09120 Genetic Information Processing;09121 Transcription;03040 Spliceosome;K12741	K12741	HNRNPA1_3	heterogeneous nuclear ribonucleoprotein A1/A3
dark-hl	UPREGULATED	-2.069	0.991	09120 Genetic Information Processing;09121 Transcription;03040 Spliceosome;K12817	K12817	PRPF18,	pre-mRNA-splicing factor 18
dark-hl	UPREGULATED	-2.184	1	09120 Genetic Information Processing;09121 Transcription;03040 Spliceosome;K12820	K12820	DHX15,	pre-mRNA-splicing factor ATP-dependent RNA helicase DHX15/PRP43 [EC:3.6.4.13]
dark-hl	UPREGULATED	-1.06	0.999	09120 Genetic Information Processing;09121 Transcription;03040 Spliceosome;K12823	K12823	DDX5,	ATP-dependent RNA helicase DDX5/DBP2 [EC:3.6.4.13]
dark-hl	UPREGULATED	-2.885	1	09120 Genetic Information Processing;09121 Transcription;03040 Spliceosome;K12824	K12824	TCERG1,	transcription elongation regulator 1
dark-hl	UPREGULATED	-1.965	0.999	09120 Genetic Information Processing;09121 Transcription;03040 Spliceosome;K12825	K12825	SF3A1,	splicing factor 3A subunit 1
dark-hl	UPREGULATED	-2.69	1	09120 Genetic Information Processing;09121 Transcription;03040 Spliceosome;K12827	K12827	SF3A3,	splicing factor 3A subunit 3
dark-hl	UPREGULATED	-1.191	0.962	09120 Genetic Information Processing;09121 Transcription;03040 Spliceosome;K12828	K12828	SF3B1,	splicing factor 3B subunit 1
dark-hl	UPREGULATED	-2.497	1	09120 Genetic Information Processing;09121 Transcription;03040 Spliceosome;K12830	K12830	SF3B3,	splicing factor 3B subunit 3
dark-hl	UPREGULATED	-2.179	0.997	09120 Genetic Information Processing;09121 Transcription;03040 Spliceosome;K12831	K12831	SF3B4,	splicing factor 3B subunit 4
dark-hl	UPREGULATED	-2.155	1	09120 Genetic Information Processing;09121 Transcription;03040 Spliceosome;K12833	K12833	SF3B14	pre-mRNA branch site protein p14
dark-hl	UPREGULATED	-2.017	0.99	09120 Genetic Information Processing;09121 Transcription;03040 Spliceosome;K12834	K12834	PHF5A	PHD finger-like domain-containing protein 5A
dark-hl	UPREGULATED	-1.701	1	09120 Genetic Information Processing;09121 Transcription;03040 Spliceosome;K12837	K12837	U2AF2	splicing factor U2AF 65 kDa subunit
dark-hl	UPREGULATED	-1.614	1	09120 Genetic Information Processing;09121 Transcription;03040 Spliceosome;K12839	K12839	SMNDC1,	survival of motor neuron-related-splicing factor 30
dark-hl	UPREGULATED	-2.387	0.999	09120 Genetic Information Processing;09121 Transcription;03040 Spliceosome;K12843	K12843	PRPF3,	U4/U6 small nuclear ribonucleoprotein PRP3
dark-hl	UPREGULATED	-2.094	1	09120 Genetic Information Processing;09121 Transcription;03040 Spliceosome;K12844	K12844	PRPF31	U4/U6 small nuclear ribonucleoprotein PRP31
dark-hl	UPREGULATED	-1.888	1	09120 Genetic Information Processing;09121 Transcription;03040 Spliceosome;K12845	K12845	SNU13,	U4/U6 small nuclear ribonucleoprotein SNU13
dark-hl	UPREGULATED	-1.696	1	09120 Genetic Information Processing;09121 Transcription;03040 Spliceosome;K12847	K12847	USP39,	U4/U6.U5 tri-snRNP-associated protein 2
dark-hl	UPREGULATED	-1.263	0.967	09120 Genetic Information Processing;09121 Transcription;03040 Spliceosome;K12849	K12849	PRPF38A	pre-mRNA-splicing factor 38A
dark-hl	UPREGULATED	-1.263	0.967	09120 Genetic Information Processing;09121 Transcription;03040 Spliceosome;K12851	K12851	PRP38	pre-mRNA-splicing factor 38
dark-hl	UPREGULATED	-1.605	0.995	09120 Genetic Information Processing;09121 Transcription;03040 Spliceosome;K12852	K12852	EFTUD2	116 kDa U5 small nuclear ribonucleoprotein component
dark-hl	UPREGULATED	-1.239	0.988	09120 Genetic Information Processing;09121 Transcription;03040 Spliceosome;K12854	K12854	SNRNP200,	pre-mRNA-splicing helicase BRR2 [EC:3.6.4.13]
dark-hl	UPREGULATED	-2.545	1	09120 Genetic Information Processing;09121 Transcription;03040 Spliceosome;K12857	K12857	SNRNP40,	Prp8 binding protein
dark-hl	UPREGULATED	-3.196	1	09120 Genetic Information Processing;09121 Transcription;03040 Spliceosome;K12860	K12860	CDC5L,	pre-mRNA-splicing factor CDC5/CEF1
dark-hl	UPREGULATED	-3.779	1	09120 Genetic Information Processing;09121 Transcription;03040 Spliceosome;K12861	K12861	BCAS2	pre-mRNA-splicing factor SPF27
dark-hl	UPREGULATED	-2.549	1	09120 Genetic Information Processing;09121 Transcription;03040 Spliceosome;K12867	K12867	SYF1,	pre-mRNA-splicing factor SYF1
dark-hl	UPREGULATED	-1.947	0.999	09120 Genetic Information Processing;09121 Transcription;03040 Spliceosome;K12868	K12868	SYF2	pre-mRNA-splicing factor SYF2
dark-hl	UPREGULATED	-3.878	1	09120 Genetic Information Processing;09121 Transcription;03040 Spliceosome;K12869	K12869	CRN,	crooked neck
dark-hl	UPREGULATED	-1.835	1	09120 Genetic Information Processing;09121 Transcription;03040 Spliceosome;K12871	K12871	CCDC12	coiled-coil domain-containing protein 12
dark-hl	UPREGULATED	-1.663	1	09120 Genetic Information Processing;09121 Transcription;03040 Spliceosome;K12873	K12873	BUD31,	bud site selection protein 31
dark-hl	UPREGULATED	-2.615	1	09120 Genetic Information Processing;09121 Transcription;03040 Spliceosome;K12876	K12876	RBM8A,	RNA-binding protein 8A
dark-hl	UPREGULATED	-1.773	0.998	09120 Genetic Information Processing;09121 Transcription;03040 Spliceosome;K12877	K12877	MAGOH	protein mago nashi
dark-hl	UPREGULATED	-2.69	1	09120 Genetic Information Processing;09121 Transcription;03040 Spliceosome;K12882	K12882	NCBP1,	nuclear cap-binding protein subunit 1
dark-hl	UPREGULATED	-2.459	0.999	09120 Genetic Information Processing;09121 Transcription;03040 Spliceosome;K12883	K12883	NCBP2,	nuclear cap-binding protein subunit 2
dark-hl	UPREGULATED	-3.921	1	09120 Genetic Information Processing;09121 Transcription;03040 Spliceosome;K12889	K12889	PCBP1	poly(rC)-binding protein 1
dark-hl	UPREGULATED	-1.24	0.994	09120 Genetic Information Processing;09121 Transcription;03040 Spliceosome;K12892	K12892	SRSF3,	serine/arginine-rich splicing factor 3
dark-hl	UPREGULATED	-1.24	0.994	09120 Genetic Information Processing;09121 Transcription;03040 Spliceosome;K12896	K12896	SRSF7,	serine/arginine-rich splicing factor 7
dark-hl	UPREGULATED	-2.611	1	09120 Genetic Information Processing;09121 Transcription;03040 Spliceosome;K13025	K13025	EIF4A3,	ATP-dependent RNA helicase [EC:3.6.4.13]
dark-hl	UPREGULATED	-1.44	1	09120 Genetic Information Processing;09122 Translation;00970 Aminoacyl-tRNA biosynthesis;K01866	K01866	YARS,	tyrosyl-tRNA synthetase [EC:6.1.1.1]
dark-hl	UPREGULATED	-1.66	0.979	09120 Genetic Information Processing;09122 Translation;00970 Aminoacyl-tRNA biosynthesis;K01867	K01867	WARS,	tryptophanyl-tRNA synthetase [EC:6.1.1.2]
dark-hl	UPREGULATED	-1.293	0.983	09120 Genetic Information Processing;09122 Translation;00970 Aminoacyl-tRNA biosynthesis;K01868	K01868	TARS,	threonyl-tRNA synthetase [EC:6.1.1.3]
dark-hl	UPREGULATED	-2.333	1	09120 Genetic Information Processing;09122 Translation;00970 Aminoacyl-tRNA biosynthesis;K01869	K01869	LARS,	leucyl-tRNA synthetase [EC:6.1.1.4]
dark-hl	UPREGULATED	-1.918	0.997	09120 Genetic Information Processing;09122 Translation;00970 Aminoacyl-tRNA biosynthesis;K01870	K01870	IARS,	isoleucyl-tRNA synthetase [EC:6.1.1.5]
dark-hl	UPREGULATED	-2.063	1	09120 Genetic Information Processing;09122 Translation;00970 Aminoacyl-tRNA biosynthesis;K01873	K01873	VARS,	valyl-tRNA synthetase [EC:6.1.1.9]
dark-hl	UPREGULATED	-2.596	1	09120 Genetic Information Processing;09122 Translation;00970 Aminoacyl-tRNA biosynthesis;K01874	K01874	MARS,	methionyl-tRNA synthetase [EC:6.1.1.10]
dark-hl	UPREGULATED	-1.92	1	09120 Genetic Information Processing;09122 Translation;00970 Aminoacyl-tRNA biosynthesis;K01875	K01875	SARS,	seryl-tRNA synthetase [EC:6.1.1.11]
dark-hl	UPREGULATED	-3.486	1	09120 Genetic Information Processing;09122 Translation;00970 Aminoacyl-tRNA biosynthesis;K01876	K01876	DARS2,	aspartyl-tRNA synthetase [EC:6.1.1.12]
dark-hl	UPREGULATED	-2.659	1	09120 Genetic Information Processing;09122 Translation;00970 Aminoacyl-tRNA biosynthesis;K01885	K01885	EARS,	glutamyl-tRNA synthetase [EC:6.1.1.17]
dark-hl	UPREGULATED	-2.236	1	09120 Genetic Information Processing;09122 Translation;00970 Aminoacyl-tRNA biosynthesis;K01886	K01886	QARS,	glutaminyl-tRNA synthetase [EC:6.1.1.18]
dark-hl	UPREGULATED	-2.89	1	09120 Genetic Information Processing;09122 Translation;00970 Aminoacyl-tRNA biosynthesis;K01887	K01887	RARS,	arginyl-tRNA synthetase [EC:6.1.1.19]
dark-hl	UPREGULATED	-3.985	1	09120 Genetic Information Processing;09122 Translation;00970 Aminoacyl-tRNA biosynthesis;K01889	K01889	FARSA,	phenylalanyl-tRNA synthetase alpha chain [EC:6.1.1.20]
dark-hl	UPREGULATED	-4.45	1	09120 Genetic Information Processing;09122 Translation;00970 Aminoacyl-tRNA biosynthesis;K01890	K01890	FARSB,	phenylalanyl-tRNA synthetase beta chain [EC:6.1.1.20]
dark-hl	UPREGULATED	-3.333	1	09120 Genetic Information Processing;09122 Translation;00970 Aminoacyl-tRNA biosynthesis;K01892	K01892	HARS,	histidyl-tRNA synthetase [EC:6.1.1.21]
dark-hl	UPREGULATED	-1.796	1	09120 Genetic Information Processing;09122 Translation;00970 Aminoacyl-tRNA biosynthesis;K01893	K01893	NARS,	asparaginyl-tRNA synthetase [EC:6.1.1.22]
dark-hl	UPREGULATED	-2.016	1	09120 Genetic Information Processing;09122 Translation;00970 Aminoacyl-tRNA biosynthesis;K03341	K03341	SEPSECS	O-phospho-L-seryl-tRNASec:L-selenocysteinyl-tRNA synthase [EC:2.9.1.2]
dark-hl	UPREGULATED	-1.219	0.993	09120 Genetic Information Processing;09122 Translation;00970 Aminoacyl-tRNA biosynthesis;K04567	K04567	KARS,	lysyl-tRNA synthetase, class II [EC:6.1.1.6]
dark-hl	UPREGULATED	-1.84	0.987	09120 Genetic Information Processing;09122 Translation;00970 Aminoacyl-tRNA biosynthesis;K14163	K14163	EPRS	bifunctional glutamyl/prolyl-tRNA synthetase [EC:6.1.1.17 6.1.1.15]
dark-hl	UPREGULATED	-3.486	1	09120 Genetic Information Processing;09122 Translation;00970 Aminoacyl-tRNA biosynthesis;K22503	K22503	DARS1	aspartyl-tRNA synthetase [EC:6.1.1.12]
dark-hl	UPREGULATED	-2.906	1	09120 Genetic Information Processing;09122 Translation;03008 Ribosome biogenesis in eukaryotes;K03115	K03115	CSNK2B	casein kinase II subunit beta
dark-hl	UPREGULATED	-2.052	1	09120 Genetic Information Processing;09122 Translation;03008 Ribosome biogenesis in eukaryotes;K03264	K03264	EIF6	translation initiation factor 6
dark-hl	UPREGULATED	-2.297	1	09120 Genetic Information Processing;09122 Translation;03008 Ribosome biogenesis in eukaryotes;K06943	K06943	NOG1	nucleolar GTP-binding protein
dark-hl	UPREGULATED	-1.614	1	09120 Genetic Information Processing;09122 Translation;03008 Ribosome biogenesis in eukaryotes;K07179	K07179	RIOK2	RIO kinase 2 [EC:2.7.11.1]
dark-hl	UPREGULATED	-1.511	1	09120 Genetic Information Processing;09122 Translation;03008 Ribosome biogenesis in eukaryotes;K07936	K07936	RAN	GTP-binding nuclear protein Ran
dark-hl	UPREGULATED	-2.814	1	09120 Genetic Information Processing;09122 Translation;03008 Ribosome biogenesis in eukaryotes;K11128	K11128	GAR1,	H/ACA ribonucleoprotein complex subunit 1
dark-hl	UPREGULATED	-3.549	1	09120 Genetic Information Processing;09122 Translation;03008 Ribosome biogenesis in eukaryotes;K11129	K11129	NHP2,	H/ACA ribonucleoprotein complex subunit 2
dark-hl	UPREGULATED	-4.765	1	09120 Genetic Information Processing;09122 Translation;03008 Ribosome biogenesis in eukaryotes;K11130	K11130	NOP10,	H/ACA ribonucleoprotein complex subunit 3
dark-hl	UPREGULATED	-2.799	1	09120 Genetic Information Processing;09122 Translation;03008 Ribosome biogenesis in eukaryotes;K11131	K11131	DKC1,	H/ACA ribonucleoprotein complex subunit 4 [EC:5.4.99.-]
dark-hl	UPREGULATED	-2.199	0.999	09120 Genetic Information Processing;09122 Translation;03008 Ribosome biogenesis in eukaryotes;K11883	K11883	NOB1	RNA-binding protein NOB1
dark-hl	UPREGULATED	-2.237	0.998	09120 Genetic Information Processing;09122 Translation;03008 Ribosome biogenesis in eukaryotes;K12619	K12619	XRN2,	5'-3' exoribonuclease 2 [EC:3.1.13.-]
dark-hl	UPREGULATED	-1.888	1	09120 Genetic Information Processing;09122 Translation;03008 Ribosome biogenesis in eukaryotes;K12845	K12845	SNU13,	U4/U6 small nuclear ribonucleoprotein SNU13
dark-hl	UPREGULATED	-2.69	1	09120 Genetic Information Processing;09122 Translation;03008 Ribosome biogenesis in eukaryotes;K13288	K13288	orn,	oligoribonuclease [EC:3.1.-.-]
dark-hl	UPREGULATED	-1.93	0.987	09120 Genetic Information Processing;09122 Translation;03008 Ribosome biogenesis in eukaryotes;K14544	K14544	UTP22,	U3 small nucleolar RNA-associated protein 22
dark-hl	UPREGULATED	-2.006	0.996	09120 Genetic Information Processing;09122 Translation;03008 Ribosome biogenesis in eukaryotes;K14549	K14549	UTP15	U3 small nucleolar RNA-associated protein 15
dark-hl	UPREGULATED	-1.93	0.987	09120 Genetic Information Processing;09122 Translation;03008 Ribosome biogenesis in eukaryotes;K14552	K14552	NAN1,	NET1-associated nuclear protein 1 (U3 small nucleolar RNA-associated protein 17)
dark-hl	UPREGULATED	-1.753	1	09120 Genetic Information Processing;09122 Translation;03008 Ribosome biogenesis in eukaryotes;K14554	K14554	UTP21,	U3 small nucleolar RNA-associated protein 21
dark-hl	UPREGULATED	-1.403	0.991	09120 Genetic Information Processing;09122 Translation;03008 Ribosome biogenesis in eukaryotes;K14555	K14555	UTP13,	U3 small nucleolar RNA-associated protein 13
dark-hl	UPREGULATED	-2.006	0.996	09120 Genetic Information Processing;09122 Translation;03008 Ribosome biogenesis in eukaryotes;K14556	K14556	DIP2,	U3 small nucleolar RNA-associated protein 12
dark-hl	UPREGULATED	-2.865	1	09120 Genetic Information Processing;09122 Translation;03008 Ribosome biogenesis in eukaryotes;K14561	K14561	IMP4	U3 small nucleolar ribonucleoprotein protein IMP4
dark-hl	UPREGULATED	-1.853	1	09120 Genetic Information Processing;09122 Translation;03008 Ribosome biogenesis in eukaryotes;K14564	K14564	NOP56	nucleolar protein 56
dark-hl	UPREGULATED	-3.919	1	09120 Genetic Information Processing;09122 Translation;03008 Ribosome biogenesis in eukaryotes;K14565	K14565	NOP58	nucleolar protein 58
dark-hl	UPREGULATED	-1.85	1	09120 Genetic Information Processing;09122 Translation;03008 Ribosome biogenesis in eukaryotes;K14566	K14566	UTP24,	U3 small nucleolar RNA-associated protein 24
dark-hl	UPREGULATED	-2.1	0.994	09120 Genetic Information Processing;09122 Translation;03008 Ribosome biogenesis in eukaryotes;K14568	K14568	EMG1,	rRNA small subunit pseudouridine methyltransferase Nep1 [EC:2.1.1.260]
dark-hl	UPREGULATED	-1.792	0.985	09120 Genetic Information Processing;09122 Translation;03008 Ribosome biogenesis in eukaryotes;K14572	K14572	MDN1,	midasin
dark-hl	UPREGULATED	-1.896	1	09120 Genetic Information Processing;09122 Translation;03008 Ribosome biogenesis in eukaryotes;K14573	K14573	NOP4,	nucleolar protein 4
dark-hl	UPREGULATED	-2.292	0.997	09120 Genetic Information Processing;09122 Translation;03008 Ribosome biogenesis in eukaryotes;K18532	K18532	AK6,	adenylate kinase [EC:2.7.4.3]
dark-hl	UPREGULATED	-1.907	1	09120 Genetic Information Processing;09122 Translation;03010 Ribosome;K02863	K02863	RP-L1,	large subunit ribosomal protein L1
dark-hl	UPREGULATED	-4.2	1	09120 Genetic Information Processing;09122 Translation;03010 Ribosome;K02865	K02865	RP-L10Ae,	large subunit ribosomal protein L10Ae
dark-hl	UPREGULATED	-1.453	1	09120 Genetic Information Processing;09122 Translation;03010 Ribosome;K02866	K02866	RP-L10e,	large subunit ribosomal protein L10e
dark-hl	UPREGULATED	-1.935	0.987	09120 Genetic Information Processing;09122 Translation;03010 Ribosome;K02867	K02867	RP-L11,	large subunit ribosomal protein L11
dark-hl	UPREGULATED	-2.923	1	09120 Genetic Information Processing;09122 Translation;03010 Ribosome;K02870	K02870	RP-L12e,	large subunit ribosomal protein L12e
dark-hl	UPREGULATED	-2.263	1	09120 Genetic Information Processing;09122 Translation;03010 Ribosome;K02871	K02871	RP-L13,	large subunit ribosomal protein L13
dark-hl	UPREGULATED	-3.457	1	09120 Genetic Information Processing;09122 Translation;03010 Ribosome;K02872	K02872	RP-L13Ae,	large subunit ribosomal protein L13Ae
dark-hl	UPREGULATED	-2.214	1	09120 Genetic Information Processing;09122 Translation;03010 Ribosome;K02873	K02873	RP-L13e,	large subunit ribosomal protein L13e
dark-hl	UPREGULATED	-2.549	1	09120 Genetic Information Processing;09122 Translation;03010 Ribosome;K02875	K02875	RP-L14e,	large subunit ribosomal protein L14e
dark-hl	UPREGULATED	-1.168	1	09120 Genetic Information Processing;09122 Translation;03010 Ribosome;K02876	K02876	RP-L15,	large subunit ribosomal protein L15
dark-hl	UPREGULATED	-2.248	1	09120 Genetic Information Processing;09122 Translation;03010 Ribosome;K02877	K02877	RP-L15e,	large subunit ribosomal protein L15e
dark-hl	UPREGULATED	-1.078	0.999	09120 Genetic Information Processing;09122 Translation;03010 Ribosome;K02879	K02879	RP-L17,	large subunit ribosomal protein L17
dark-hl	UPREGULATED	-2.899	1	09120 Genetic Information Processing;09122 Translation;03010 Ribosome;K02880	K02880	RP-L17e,	large subunit ribosomal protein L17e
dark-hl	UPREGULATED	-2.613	1	09120 Genetic Information Processing;09122 Translation;03010 Ribosome;K02883	K02883	RP-L18e,	large subunit ribosomal protein L18e
dark-hl	UPREGULATED	-3.088	1	09120 Genetic Information Processing;09122 Translation;03010 Ribosome;K02884	K02884	RP-L19,	large subunit ribosomal protein L19
dark-hl	UPREGULATED	-2.552	1	09120 Genetic Information Processing;09122 Translation;03010 Ribosome;K02885	K02885	RP-L19e,	large subunit ribosomal protein L19e
dark-hl	UPREGULATED	-3.469	1	09120 Genetic Information Processing;09122 Translation;03010 Ribosome;K02891	K02891	RP-L22e,	large subunit ribosomal protein L22e
dark-hl	UPREGULATED	-2.502	1	09120 Genetic Information Processing;09122 Translation;03010 Ribosome;K02893	K02893	RP-L23Ae,	large subunit ribosomal protein L23Ae
dark-hl	UPREGULATED	-2.916	1	09120 Genetic Information Processing;09122 Translation;03010 Ribosome;K02894	K02894	RP-L23e,	large subunit ribosomal protein L23e
dark-hl	UPREGULATED	-2.326	0.998	09120 Genetic Information Processing;09122 Translation;03010 Ribosome;K02895	K02895	RP-L24,	large subunit ribosomal protein L24
dark-hl	UPREGULATED	-2.028	1	09120 Genetic Information Processing;09122 Translation;03010 Ribosome;K02896	K02896	RP-L24e,	large subunit ribosomal protein L24e
dark-hl	UPREGULATED	-3.671	1	09120 Genetic Information Processing;09122 Translation;03010 Ribosome;K02898	K02898	RP-L26e,	large subunit ribosomal protein L26e
dark-hl	UPREGULATED	-2.13	0.994	09120 Genetic Information Processing;09122 Translation;03010 Ribosome;K02899	K02899	RP-L27,	large subunit ribosomal protein L27
dark-hl	UPREGULATED	-2.4	1	09120 Genetic Information Processing;09122 Translation;03010 Ribosome;K02901	K02901	RP-L27e,	large subunit ribosomal protein L27e
dark-hl	UPREGULATED	-2.757	1	09120 Genetic Information Processing;09122 Translation;03010 Ribosome;K02903	K02903	RP-L28e,	large subunit ribosomal protein L28e
dark-hl	UPREGULATED	-1.298	1	09120 Genetic Information Processing;09122 Translation;03010 Ribosome;K02904	K02904	RP-L29,	large subunit ribosomal protein L29
dark-hl	UPREGULATED	-2.451	1	09120 Genetic Information Processing;09122 Translation;03010 Ribosome;K02907	K02907	RP-L30,	large subunit ribosomal protein L30
dark-hl	UPREGULATED	-1.453	1	09120 Genetic Information Processing;09122 Translation;03010 Ribosome;K02908	K02908	RP-L30e,	large subunit ribosomal protein L30e
dark-hl	UPREGULATED	-3.82	1	09120 Genetic Information Processing;09122 Translation;03010 Ribosome;K02910	K02910	RP-L31e,	large subunit ribosomal protein L31e
dark-hl	UPREGULATED	-1.948	1	09120 Genetic Information Processing;09122 Translation;03010 Ribosome;K02912	K02912	RP-L32e,	large subunit ribosomal protein L32e
dark-hl	UPREGULATED	-2.682	1	09120 Genetic Information Processing;09122 Translation;03010 Ribosome;K02915	K02915	RP-L34e,	large subunit ribosomal protein L34e
dark-hl	UPREGULATED	-2.136	1	09120 Genetic Information Processing;09122 Translation;03010 Ribosome;K02917	K02917	RP-L35Ae,	large subunit ribosomal protein L35Ae
dark-hl	UPREGULATED	-3.413	1	09120 Genetic Information Processing;09122 Translation;03010 Ribosome;K02918	K02918	RP-L35e,	large subunit ribosomal protein L35e
dark-hl	UPREGULATED	-2.906	1	09120 Genetic Information Processing;09122 Translation;03010 Ribosome;K02920	K02920	RP-L36e,	large subunit ribosomal protein L36e
dark-hl	UPREGULATED	-2.408	1	09120 Genetic Information Processing;09122 Translation;03010 Ribosome;K02921	K02921	RP-L37Ae,	large subunit ribosomal protein L37Ae
dark-hl	UPREGULATED	-2.765	1	09120 Genetic Information Processing;09122 Translation;03010 Ribosome;K02922	K02922	RP-L37e,	large subunit ribosomal protein L37e
dark-hl	UPREGULATED	-1.272	1	09120 Genetic Information Processing;09122 Translation;03010 Ribosome;K02923	K02923	RP-L38e,	large subunit ribosomal protein L38e
dark-hl	UPREGULATED	-2.236	1	09120 Genetic Information Processing;09122 Translation;03010 Ribosome;K02924	K02924	RP-L39e,	large subunit ribosomal protein L39e
dark-hl	UPREGULATED	-3.413	1	09120 Genetic Information Processing;09122 Translation;03010 Ribosome;K02925	K02925	RP-L3e,	large subunit ribosomal protein L3e
dark-hl	UPREGULATED	-2.414	1	09120 Genetic Information Processing;09122 Translation;03010 Ribosome;K02926	K02926	RP-L4,	large subunit ribosomal protein L4
dark-hl	UPREGULATED	-2.485	1	09120 Genetic Information Processing;09122 Translation;03010 Ribosome;K02929	K02929	RP-L44e,	large subunit ribosomal protein L44e
dark-hl	UPREGULATED	-2.458	1	09120 Genetic Information Processing;09122 Translation;03010 Ribosome;K02930	K02930	RP-L4e,	large subunit ribosomal protein L4e
dark-hl	UPREGULATED	-3.629	1	09120 Genetic Information Processing;09122 Translation;03010 Ribosome;K02932	K02932	RP-L5e,	large subunit ribosomal protein L5e
dark-hl	UPREGULATED	-1.943	1	09120 Genetic Information Processing;09122 Translation;03010 Ribosome;K02934	K02934	RP-L6e,	large subunit ribosomal protein L6e
dark-hl	UPREGULATED	-1.907	1	09120 Genetic Information Processing;09122 Translation;03010 Ribosome;K02935	K02935	RP-L7,	large subunit ribosomal protein L7/L12
dark-hl	UPREGULATED	-3.584	1	09120 Genetic Information Processing;09122 Translation;03010 Ribosome;K02936	K02936	RP-L7Ae,	large subunit ribosomal protein L7Ae
dark-hl	UPREGULATED	-2.788	1	09120 Genetic Information Processing;09122 Translation;03010 Ribosome;K02937	K02937	RP-L7e,	large subunit ribosomal protein L7e
dark-hl	UPREGULATED	-3.272	1	09120 Genetic Information Processing;09122 Translation;03010 Ribosome;K02938	K02938	RP-L8e,	large subunit ribosomal protein L8e
dark-hl	UPREGULATED	-3.413	1	09120 Genetic Information Processing;09122 Translation;03010 Ribosome;K02939	K02939	RP-L9,	large subunit ribosomal protein L9
dark-hl	UPREGULATED	-3.376	1	09120 Genetic Information Processing;09122 Translation;03010 Ribosome;K02940	K02940	RP-L9e,	large subunit ribosomal protein L9e
dark-hl	UPREGULATED	-3.147	1	09120 Genetic Information Processing;09122 Translation;03010 Ribosome;K02941	K02941	RP-LP0,	large subunit ribosomal protein LP0
dark-hl	UPREGULATED	-2.112	1	09120 Genetic Information Processing;09122 Translation;03010 Ribosome;K02942	K02942	RP-LP1,	large subunit ribosomal protein LP1
dark-hl	UPREGULATED	-2.292	1	09120 Genetic Information Processing;09122 Translation;03010 Ribosome;K02943	K02943	RP-LP2,	large subunit ribosomal protein LP2
dark-hl	UPREGULATED	-1.66	0.979	09120 Genetic Information Processing;09122 Translation;03010 Ribosome;K02946	K02946	RP-S10,	small subunit ribosomal protein S10
dark-hl	UPREGULATED	-4.132	1	09120 Genetic Information Processing;09122 Translation;03010 Ribosome;K02947	K02947	RP-S10e,	small subunit ribosomal protein S10e
dark-hl	UPREGULATED	-2.336	1	09120 Genetic Information Processing;09122 Translation;03010 Ribosome;K02949	K02949	RP-S11e,	small subunit ribosomal protein S11e
dark-hl	UPREGULATED	-2.232	1	09120 Genetic Information Processing;09122 Translation;03010 Ribosome;K02951	K02951	RP-S12e,	small subunit ribosomal protein S12e
dark-hl	UPREGULATED	-3.271	1	09120 Genetic Information Processing;09122 Translation;03010 Ribosome;K02953	K02953	RP-S13e,	small subunit ribosomal protein S13e
dark-hl	UPREGULATED	-2.624	1	09120 Genetic Information Processing;09122 Translation;03010 Ribosome;K02955	K02955	RP-S14e,	small subunit ribosomal protein S14e
dark-hl	UPREGULATED	-2.098	1	09120 Genetic Information Processing;09122 Translation;03010 Ribosome;K02956	K02956	RP-S15,	small subunit ribosomal protein S15
dark-hl	UPREGULATED	-2.509	1	09120 Genetic Information Processing;09122 Translation;03010 Ribosome;K02957	K02957	RP-S15Ae,	small subunit ribosomal protein S15Ae
dark-hl	UPREGULATED	-1.95	0.994	09120 Genetic Information Processing;09122 Translation;03010 Ribosome;K02959	K02959	RP-S16,	small subunit ribosomal protein S16
dark-hl	UPREGULATED	-2.741	1	09120 Genetic Information Processing;09122 Translation;03010 Ribosome;K02960	K02960	RP-S16e,	small subunit ribosomal protein S16e
dark-hl	UPREGULATED	-2.559	1	09120 Genetic Information Processing;09122 Translation;03010 Ribosome;K02962	K02962	RP-S17e,	small subunit ribosomal protein S17e
dark-hl	UPREGULATED	-2.422	1	09120 Genetic Information Processing;09122 Translation;03010 Ribosome;K02964	K02964	RP-S18e,	small subunit ribosomal protein S18e
dark-hl	UPREGULATED	-1.599	1	09120 Genetic Information Processing;09122 Translation;03010 Ribosome;K02966	K02966	RP-S19e,	small subunit ribosomal protein S19e
dark-hl	UPREGULATED	-3.786	1	09120 Genetic Information Processing;09122 Translation;03010 Ribosome;K02969	K02969	RP-S20e,	small subunit ribosomal protein S20e
dark-hl	UPREGULATED	-2.33	1	09120 Genetic Information Processing;09122 Translation;03010 Ribosome;K02971	K02971	RP-S21e,	small subunit ribosomal protein S21e
dark-hl	UPREGULATED	-2.809	1	09120 Genetic Information Processing;09122 Translation;03010 Ribosome;K02973	K02973	RP-S23e,	small subunit ribosomal protein S23e
dark-hl	UPREGULATED	-3.132	1	09120 Genetic Information Processing;09122 Translation;03010 Ribosome;K02974	K02974	RP-S24e,	small subunit ribosomal protein S24e
dark-hl	UPREGULATED	-2.963	1	09120 Genetic Information Processing;09122 Translation;03010 Ribosome;K02976	K02976	RP-S26e,	small subunit ribosomal protein S26e
dark-hl	UPREGULATED	-1.706	1	09120 Genetic Information Processing;09122 Translation;03010 Ribosome;K02977	K02977	RP-S27Ae,	ubiquitin-small subunit ribosomal protein S27Ae
dark-hl	UPREGULATED	-2.625	1	09120 Genetic Information Processing;09122 Translation;03010 Ribosome;K02978	K02978	RP-S27e,	small subunit ribosomal protein S27e
dark-hl	UPREGULATED	-2.25	1	09120 Genetic Information Processing;09122 Translation;03010 Ribosome;K02979	K02979	RP-S28e,	small subunit ribosomal protein S28e
dark-hl	UPREGULATED	-2.352	1	09120 Genetic Information Processing;09122 Translation;03010 Ribosome;K02980	K02980	RP-S29e,	small subunit ribosomal protein S29e
dark-hl	UPREGULATED	-2.031	1	09120 Genetic Information Processing;09122 Translation;03010 Ribosome;K02981	K02981	RP-S2e,	small subunit ribosomal protein S2e
dark-hl	UPREGULATED	-1.926	1	09120 Genetic Information Processing;09122 Translation;03010 Ribosome;K02983	K02983	RP-S30e,	small subunit ribosomal protein S30e
dark-hl	UPREGULATED	-3.34	1	09120 Genetic Information Processing;09122 Translation;03010 Ribosome;K02984	K02984	RP-S3Ae,	small subunit ribosomal protein S3Ae
dark-hl	UPREGULATED	-3.406	1	09120 Genetic Information Processing;09122 Translation;03010 Ribosome;K02985	K02985	RP-S3e,	small subunit ribosomal protein S3e
dark-hl	UPREGULATED	-2.979	1	09120 Genetic Information Processing;09122 Translation;03010 Ribosome;K02987	K02987	RP-S4e,	small subunit ribosomal protein S4e
dark-hl	UPREGULATED	-2.36	1	09120 Genetic Information Processing;09122 Translation;03010 Ribosome;K02989	K02989	RP-S5e,	small subunit ribosomal protein S5e
dark-hl	UPREGULATED	-2.332	1	09120 Genetic Information Processing;09122 Translation;03010 Ribosome;K02991	K02991	RP-S6e,	small subunit ribosomal protein S6e
dark-hl	UPREGULATED	-2.127	1	09120 Genetic Information Processing;09122 Translation;03010 Ribosome;K02993	K02993	RP-S7e,	small subunit ribosomal protein S7e
dark-hl	UPREGULATED	-2.42	1	09120 Genetic Information Processing;09122 Translation;03010 Ribosome;K02995	K02995	RP-S8e,	small subunit ribosomal protein S8e
dark-hl	UPREGULATED	-3.025	1	09120 Genetic Information Processing;09122 Translation;03010 Ribosome;K02997	K02997	RP-S9e,	small subunit ribosomal protein S9e
dark-hl	UPREGULATED	-3.252	1	09120 Genetic Information Processing;09122 Translation;03010 Ribosome;K02998	K02998	RP-SAe,	small subunit ribosomal protein SAe
dark-hl	UPREGULATED	-1.766	1	09120 Genetic Information Processing;09122 Translation;03013 Nucleocytoplasmic transport;K03231	K03231	EEF1A	elongation factor 1-alpha
dark-hl	UPREGULATED	-1.511	1	09120 Genetic Information Processing;09122 Translation;03013 Nucleocytoplasmic transport;K07936	K07936	RAN	GTP-binding nuclear protein Ran
dark-hl	UPREGULATED	-1.064	0.965	09120 Genetic Information Processing;09122 Translation;03013 Nucleocytoplasmic transport;K10577	K10577	UBE2I,	ubiquitin-conjugating enzyme E2 I
dark-hl	UPREGULATED	-2.615	1	09120 Genetic Information Processing;09122 Translation;03013 Nucleocytoplasmic transport;K12876	K12876	RBM8A,	RNA-binding protein 8A
dark-hl	UPREGULATED	-1.773	0.998	09120 Genetic Information Processing;09122 Translation;03013 Nucleocytoplasmic transport;K12877	K12877	MAGOH	protein mago nashi
dark-hl	UPREGULATED	-2.69	1	09120 Genetic Information Processing;09122 Translation;03013 Nucleocytoplasmic transport;K12882	K12882	NCBP1,	nuclear cap-binding protein subunit 1
dark-hl	UPREGULATED	-2.459	0.999	09120 Genetic Information Processing;09122 Translation;03013 Nucleocytoplasmic transport;K12883	K12883	NCBP2,	nuclear cap-binding protein subunit 2
dark-hl	UPREGULATED	-2.611	1	09120 Genetic Information Processing;09122 Translation;03013 Nucleocytoplasmic transport;K13025	K13025	EIF4A3,	ATP-dependent RNA helicase [EC:3.6.4.13]
dark-hl	UPREGULATED	-1.743	0.974	09120 Genetic Information Processing;09122 Translation;03013 Nucleocytoplasmic transport;K13174	K13174	THOC5	THO complex subunit 5
dark-hl	UPREGULATED	-1.979	0.99	09120 Genetic Information Processing;09122 Translation;03013 Nucleocytoplasmic transport;K13176	K13176	THOC7	THO complex subunit 7
dark-hl	UPREGULATED	-2.411	1	09120 Genetic Information Processing;09122 Translation;03013 Nucleocytoplasmic transport;K14293	K14293	KPNB1,	importin subunit beta-1
dark-hl	UPREGULATED	-2.579	0.999	09120 Genetic Information Processing;09122 Translation;03013 Nucleocytoplasmic transport;K14298	K14298	RAE1,	mRNA export factor
dark-hl	UPREGULATED	-1.739	0.969	09120 Genetic Information Processing;09122 Translation;03013 Nucleocytoplasmic transport;K14306	K14306	NUP62,	nuclear pore complex protein Nup62
dark-hl	UPREGULATED	-2.059	0.997	09120 Genetic Information Processing;09122 Translation;03013 Nucleocytoplasmic transport;K14328	K14328	UPF3,	regulator of nonsense transcripts 3
dark-hl	UPREGULATED	-1.578	1	09120 Genetic Information Processing;09122 Translation;03013 Nucleocytoplasmic transport;K15042	K15042	KPNA5_6	importin subunit alpha-6/7
dark-hl	UPREGULATED	-1.578	1	09120 Genetic Information Processing;09122 Translation;03013 Nucleocytoplasmic transport;K15043	K15043	KPNA2_7	importin subunit alpha-1/8
dark-hl	UPREGULATED	-2.12	1	09120 Genetic Information Processing;09122 Translation;03013 Nucleocytoplasmic transport;K20221	K20221	IPO4,	importin-4
dark-hl	UPREGULATED	-3.229	1	09120 Genetic Information Processing;09122 Translation;03013 Nucleocytoplasmic transport;K20224	K20224	IPO9,	importin-9
dark-hl	UPREGULATED	-2.456	1	09120 Genetic Information Processing;09122 Translation;03015 mRNA surveillance pathway;K03265	K03265	ETF1,	peptide chain release factor subunit 1
dark-hl	UPREGULATED	-1.816	1	09120 Genetic Information Processing;09122 Translation;03015 mRNA surveillance pathway;K03267	K03267	ERF3,	peptide chain release factor subunit 3
dark-hl	UPREGULATED	-2.765	1	09120 Genetic Information Processing;09122 Translation;03015 mRNA surveillance pathway;K06269	K06269	PPP1C	serine/threonine-protein phosphatase PP1 catalytic subunit [EC:3.1.3.16]
dark-hl	UPREGULATED	-2.411	1	09120 Genetic Information Processing;09122 Translation;03015 mRNA surveillance pathway;K08873	K08873	SMG1	serine/threonine-protein kinase SMG1 [EC:2.7.11.1]
dark-hl	UPREGULATED	-2.615	1	09120 Genetic Information Processing;09122 Translation;03015 mRNA surveillance pathway;K12876	K12876	RBM8A,	RNA-binding protein 8A
dark-hl	UPREGULATED	-1.773	0.998	09120 Genetic Information Processing;09122 Translation;03015 mRNA surveillance pathway;K12877	K12877	MAGOH	protein mago nashi
dark-hl	UPREGULATED	-2.69	1	09120 Genetic Information Processing;09122 Translation;03015 mRNA surveillance pathway;K12882	K12882	NCBP1,	nuclear cap-binding protein subunit 1
dark-hl	UPREGULATED	-2.459	0.999	09120 Genetic Information Processing;09122 Translation;03015 mRNA surveillance pathway;K12883	K12883	NCBP2,	nuclear cap-binding protein subunit 2
dark-hl	UPREGULATED	-2.611	1	09120 Genetic Information Processing;09122 Translation;03015 mRNA surveillance pathway;K13025	K13025	EIF4A3,	ATP-dependent RNA helicase [EC:3.6.4.13]
dark-hl	UPREGULATED	-1.739	0.969	09120 Genetic Information Processing;09122 Translation;03015 mRNA surveillance pathway;K13126	K13126	PABPC	polyadenylate-binding protein
dark-hl	UPREGULATED	-2.059	0.997	09120 Genetic Information Processing;09122 Translation;03015 mRNA surveillance pathway;K14328	K14328	UPF3,	regulator of nonsense transcripts 3
dark-hl	UPREGULATED	-3.088	1	09120 Genetic Information Processing;09122 Translation;03015 mRNA surveillance pathway;K14396	K14396	PABPN1,	polyadenylate-binding protein 2
dark-hl	UPREGULATED	-1.888	1	09120 Genetic Information Processing;09122 Translation;03015 mRNA surveillance pathway;K14404	K14404	CPSF4,	cleavage and polyadenylation specificity factor subunit 4
dark-hl	UPREGULATED	-1.792	0.985	09120 Genetic Information Processing;09122 Translation;03015 mRNA surveillance pathway;K14406	K14406	CSTF1	cleavage stimulation factor subunit 1
dark-hl	UPREGULATED	-3.707	1	09120 Genetic Information Processing;09122 Translation;03015 mRNA surveillance pathway;K14411	K14411	MSI	RNA-binding protein Musashi
dark-hl	UPREGULATED	-2.456	1	09120 Genetic Information Processing;09123 Folding, sorting and degradation;03018 RNA degradation;K04043	K04043	dnaK,	molecular chaperone DnaK
dark-hl	UPREGULATED	-1.322	1	09120 Genetic Information Processing;09123 Folding, sorting and degradation;03018 RNA degradation;K04077	K04077	groEL,	chaperonin GroEL [EC:5.6.1.7]
dark-hl	UPREGULATED	-2.017	0.99	09120 Genetic Information Processing;09123 Folding, sorting and degradation;03018 RNA degradation;K07573	K07573	CSL4,	exosome complex component CSL4
dark-hl	UPREGULATED	-1.445	0.994	09120 Genetic Information Processing;09123 Folding, sorting and degradation;03018 RNA degradation;K12580	K12580	CNOT3,	CCR4-NOT transcription complex subunit 3
dark-hl	UPREGULATED	-2.232	1	09120 Genetic Information Processing;09123 Folding, sorting and degradation;03018 RNA degradation;K12581	K12581	CNOT7_8,	CCR4-NOT transcription complex subunit 7/8
dark-hl	UPREGULATED	-3.162	1	09120 Genetic Information Processing;09123 Folding, sorting and degradation;03018 RNA degradation;K12599	K12599	SKI2,	antiviral helicase SKI2 [EC:3.6.4.13]
dark-hl	UPREGULATED	-1.935	0.987	09120 Genetic Information Processing;09123 Folding, sorting and degradation;03018 RNA degradation;K12605	K12605	CNOT2,	CCR4-NOT transcription complex subunit 2
dark-hl	UPREGULATED	-4.72	1	09120 Genetic Information Processing;09123 Folding, sorting and degradation;03018 RNA degradation;K12608	K12608	CAF16	CCR4-NOT complex subunit CAF16
dark-hl	UPREGULATED	-2.237	0.998	09120 Genetic Information Processing;09123 Folding, sorting and degradation;03018 RNA degradation;K12619	K12619	XRN2,	5'-3' exoribonuclease 2 [EC:3.1.13.-]
dark-hl	UPREGULATED	-2.006	0.996	09120 Genetic Information Processing;09123 Folding, sorting and degradation;03018 RNA degradation;K12621	K12621	LSM2	U6 snRNA-associated Sm-like protein LSm2
dark-hl	UPREGULATED	-1.739	0.969	09120 Genetic Information Processing;09123 Folding, sorting and degradation;03018 RNA degradation;K13126	K13126	PABPC	polyadenylate-binding protein
dark-hl	UPREGULATED	-1.421	0.996	09120 Genetic Information Processing;09123 Folding, sorting and degradation;03018 RNA degradation;K14442	K14442	DHX36,	ATP-dependent RNA helicase DHX36 [EC:3.6.4.13]
dark-hl	UPREGULATED	-2.482	1	09120 Genetic Information Processing;09123 Folding, sorting and degradation;03050 Proteasome;K02725	K02725	PSMA1	20S proteasome subunit alpha 6 [EC:3.4.25.1]
dark-hl	UPREGULATED	-3.293	1	09120 Genetic Information Processing;09123 Folding, sorting and degradation;03050 Proteasome;K02726	K02726	PSMA2	20S proteasome subunit alpha 2 [EC:3.4.25.1]
dark-hl	UPREGULATED	-1.655	1	09120 Genetic Information Processing;09123 Folding, sorting and degradation;03050 Proteasome;K02727	K02727	PSMA3	20S proteasome subunit alpha 7 [EC:3.4.25.1]
dark-hl	UPREGULATED	-2.797	1	09120 Genetic Information Processing;09123 Folding, sorting and degradation;03050 Proteasome;K02728	K02728	PSMA4	20S proteasome subunit alpha 3 [EC:3.4.25.1]
dark-hl	UPREGULATED	-2.451	1	09120 Genetic Information Processing;09123 Folding, sorting and degradation;03050 Proteasome;K02729	K02729	PSMA5	20S proteasome subunit alpha 5 [EC:3.4.25.1]
dark-hl	UPREGULATED	-2.138	1	09120 Genetic Information Processing;09123 Folding, sorting and degradation;03050 Proteasome;K02730	K02730	PSMA6	20S proteasome subunit alpha 1 [EC:3.4.25.1]
dark-hl	UPREGULATED	-1.219	0.993	09120 Genetic Information Processing;09123 Folding, sorting and degradation;03050 Proteasome;K02732	K02732	PSMB1	20S proteasome subunit beta 6 [EC:3.4.25.1]
dark-hl	UPREGULATED	-1.862	1	09120 Genetic Information Processing;09123 Folding, sorting and degradation;03050 Proteasome;K02733	K02733	PSMB10,	20S proteasome subunit beta 10 [EC:3.4.25.1]
dark-hl	UPREGULATED	-1.696	1	09120 Genetic Information Processing;09123 Folding, sorting and degradation;03050 Proteasome;K02734	K02734	PSMB2	20S proteasome subunit beta 4 [EC:3.4.25.1]
dark-hl	UPREGULATED	-2.559	1	09120 Genetic Information Processing;09123 Folding, sorting and degradation;03050 Proteasome;K02735	K02735	PSMB3	20S proteasome subunit beta 3 [EC:3.4.25.1]
dark-hl	UPREGULATED	-2.251	1	09120 Genetic Information Processing;09123 Folding, sorting and degradation;03050 Proteasome;K02736	K02736	PSMB4	20S proteasome subunit beta 7 [EC:3.4.25.1]
dark-hl	UPREGULATED	-1.895	1	09120 Genetic Information Processing;09123 Folding, sorting and degradation;03050 Proteasome;K02737	K02737	PSMB5	20S proteasome subunit beta 5 [EC:3.4.25.1]
dark-hl	UPREGULATED	-2.499	1	09120 Genetic Information Processing;09123 Folding, sorting and degradation;03050 Proteasome;K02738	K02738	PSMB6	20S proteasome subunit beta 1 [EC:3.4.25.1]
dark-hl	UPREGULATED	-1.862	1	09120 Genetic Information Processing;09123 Folding, sorting and degradation;03050 Proteasome;K02739	K02739	PSMB7	20S proteasome subunit beta 2 [EC:3.4.25.1]
dark-hl	UPREGULATED	-1.895	1	09120 Genetic Information Processing;09123 Folding, sorting and degradation;03050 Proteasome;K02740	K02740	PSMB8,	20S proteasome subunit beta 8 [EC:3.4.25.1]
dark-hl	UPREGULATED	-2.235	1	09120 Genetic Information Processing;09123 Folding, sorting and degradation;03050 Proteasome;K03028	K03028	PSMD2,	26S proteasome regulatory subunit N1
dark-hl	UPREGULATED	-1.975	1	09120 Genetic Information Processing;09123 Folding, sorting and degradation;03050 Proteasome;K03030	K03030	PSMD14,	26S proteasome regulatory subunit N11
dark-hl	UPREGULATED	-1.445	0.994	09120 Genetic Information Processing;09123 Folding, sorting and degradation;03050 Proteasome;K03031	K03031	PSMD8,	26S proteasome regulatory subunit N12
dark-hl	UPREGULATED	-2.939	1	09120 Genetic Information Processing;09123 Folding, sorting and degradation;03050 Proteasome;K03032	K03032	PSMD1,	26S proteasome regulatory subunit N2
dark-hl	UPREGULATED	-2.615	1	09120 Genetic Information Processing;09123 Folding, sorting and degradation;03050 Proteasome;K03037	K03037	PSMD6,	26S proteasome regulatory subunit N7
dark-hl	UPREGULATED	-3.014	1	09120 Genetic Information Processing;09123 Folding, sorting and degradation;03050 Proteasome;K03038	K03038	PSMD7,	26S proteasome regulatory subunit N8
dark-hl	UPREGULATED	-1.061	0.991	09120 Genetic Information Processing;09123 Folding, sorting and degradation;03050 Proteasome;K03061	K03061	PSMC2,	26S proteasome regulatory subunit T1
dark-hl	UPREGULATED	-1.84	0.987	09120 Genetic Information Processing;09123 Folding, sorting and degradation;03050 Proteasome;K03062	K03062	PSMC1,	26S proteasome regulatory subunit T2
dark-hl	UPREGULATED	-2.334	1	09120 Genetic Information Processing;09123 Folding, sorting and degradation;03050 Proteasome;K03064	K03064	PSMC6,	26S proteasome regulatory subunit T4
dark-hl	UPREGULATED	-1.506	1	09120 Genetic Information Processing;09123 Folding, sorting and degradation;03050 Proteasome;K03065	K03065	PSMC3,	26S proteasome regulatory subunit T5
dark-hl	UPREGULATED	-1.835	0.998	09120 Genetic Information Processing;09123 Folding, sorting and degradation;03050 Proteasome;K06691	K06691	RPN13	26S proteasome regulatory subunit N13
dark-hl	UPREGULATED	-1.895	1	09120 Genetic Information Processing;09123 Folding, sorting and degradation;03050 Proteasome;K11598	K11598	PSMB11	20S proteasome subunit beta 11 [EC:3.4.25.1]
dark-hl	UPREGULATED	-1.236	1	09120 Genetic Information Processing;09123 Folding, sorting and degradation;03050 Proteasome;K11599	K11599	POMP,	proteasome maturation protein
dark-hl	UPREGULATED	-1.439	0.995	09120 Genetic Information Processing;09123 Folding, sorting and degradation;03060 Protein export;K03105	K03105	SRP19	signal recognition particle subunit SRP19
dark-hl	UPREGULATED	-1.437	1	09120 Genetic Information Processing;09123 Folding, sorting and degradation;03060 Protein export;K03106	K03106	SRP54,	signal recognition particle subunit SRP54 [EC:3.6.5.4]
dark-hl	UPREGULATED	-2.132	0.999	09120 Genetic Information Processing;09123 Folding, sorting and degradation;03060 Protein export;K03107	K03107	SRP68	signal recognition particle subunit SRP68
dark-hl	UPREGULATED	-2.553	0.999	09120 Genetic Information Processing;09123 Folding, sorting and degradation;03060 Protein export;K03108	K03108	SRP72	signal recognition particle subunit SRP72
dark-hl	UPREGULATED	-1.32	0.968	09120 Genetic Information Processing;09123 Folding, sorting and degradation;03060 Protein export;K03109	K03109	SRP9	signal recognition particle subunit SRP9
dark-hl	UPREGULATED	-2.077	1	09120 Genetic Information Processing;09123 Folding, sorting and degradation;03060 Protein export;K03217	K03217	yidC,	YidC/Oxa1 family membrane protein insertase
dark-hl	UPREGULATED	-2.714	1	09120 Genetic Information Processing;09123 Folding, sorting and degradation;03060 Protein export;K07342	K07342	SEC61G,	protein transport protein SEC61 subunit gamma and related proteins
dark-hl	UPREGULATED	-1.112	0.995	09120 Genetic Information Processing;09123 Folding, sorting and degradation;03060 Protein export;K09481	K09481	SEC61B,	protein transport protein SEC61 subunit beta
dark-hl	UPREGULATED	-1.833	1	09120 Genetic Information Processing;09123 Folding, sorting and degradation;03060 Protein export;K09490	K09490	HSPA5,	endoplasmic reticulum chaperone BiP [EC:3.6.4.10]
dark-hl	UPREGULATED	-3.84	1	09120 Genetic Information Processing;09123 Folding, sorting and degradation;03060 Protein export;K10956	K10956	SEC61A	protein transport protein SEC61 subunit alpha
dark-hl	UPREGULATED	-2.917	1	09120 Genetic Information Processing;09123 Folding, sorting and degradation;03060 Protein export;K12275	K12275	SEC62	translocation protein SEC62
dark-hl	UPREGULATED	-2.179	0.997	09120 Genetic Information Processing;09123 Folding, sorting and degradation;03060 Protein export;K13280	K13280	SEC11,	signal peptidase I [EC:3.4.21.89]
dark-hl	UPREGULATED	-1.408	0.961	09120 Genetic Information Processing;09123 Folding, sorting and degradation;03060 Protein export;K13431	K13431	SRPR	signal recognition particle receptor subunit alpha
dark-hl	UPREGULATED	-1.706	1	09120 Genetic Information Processing;09123 Folding, sorting and degradation;04120 Ubiquitin mediated proteolysis;K02977	K02977	RP-S27Ae,	ubiquitin-small subunit ribosomal protein S27Ae
dark-hl	UPREGULATED	-2.459	0.999	09120 Genetic Information Processing;09123 Folding, sorting and degradation;04120 Ubiquitin mediated proteolysis;K03354	K03354	APC7,	anaphase-promoting complex subunit 7
dark-hl	UPREGULATED	-2.222	1	09120 Genetic Information Processing;09123 Folding, sorting and degradation;04120 Ubiquitin mediated proteolysis;K04554	K04554	UBE2J2,	ubiquitin-conjugating enzyme E2 J2 [EC:2.3.2.23]
dark-hl	UPREGULATED	-1.8	1	09120 Genetic Information Processing;09123 Folding, sorting and degradation;04120 Ubiquitin mediated proteolysis;K06643	K06643	MDM2	E3 ubiquitin-protein ligase Mdm2 [EC:2.3.2.27]
dark-hl	UPREGULATED	-1.706	1	09120 Genetic Information Processing;09123 Folding, sorting and degradation;04120 Ubiquitin mediated proteolysis;K08770	K08770	UBC	ubiquitin C
dark-hl	UPREGULATED	-2.639	1	09120 Genetic Information Processing;09123 Folding, sorting and degradation;04120 Ubiquitin mediated proteolysis;K10447	K10447	KLHL9_13	kelch-like protein 9/13
dark-hl	UPREGULATED	-1.064	0.965	09120 Genetic Information Processing;09123 Folding, sorting and degradation;04120 Ubiquitin mediated proteolysis;K10577	K10577	UBE2I,	ubiquitin-conjugating enzyme E2 I
dark-hl	UPREGULATED	-1.66	0.979	09120 Genetic Information Processing;09123 Folding, sorting and degradation;04120 Ubiquitin mediated proteolysis;K10583	K10583	UBE2S,	ubiquitin-conjugating enzyme E2 S [EC:2.3.2.23]
dark-hl	UPREGULATED	-3.98	1	09120 Genetic Information Processing;09123 Folding, sorting and degradation;04120 Ubiquitin mediated proteolysis;K10599	K10599	PRPF19,	pre-mRNA-processing factor 19 [EC:2.3.2.27]
dark-hl	UPREGULATED	-2.199	0.999	09120 Genetic Information Processing;09123 Folding, sorting and degradation;04120 Ubiquitin mediated proteolysis;K10601	K10601	SYVN1,	E3 ubiquitin-protein ligase synoviolin [EC:2.3.2.27]
dark-hl	UPREGULATED	-1.549	0.991	09120 Genetic Information Processing;09123 Folding, sorting and degradation;04120 Ubiquitin mediated proteolysis;K10610	K10610	DDB1	DNA damage-binding protein 1
dark-hl	UPREGULATED	-2.064	1	09120 Genetic Information Processing;09123 Folding, sorting and degradation;04120 Ubiquitin mediated proteolysis;K10685	K10685	UBLE1B,	ubiquitin-like 1-activating enzyme E1 B [EC:6.2.1.45]
dark-hl	UPREGULATED	-2.179	0.997	09120 Genetic Information Processing;09123 Folding, sorting and degradation;04120 Ubiquitin mediated proteolysis;K10686	K10686	UBA3,	NEDD8-activating enzyme E1 [EC:6.2.1.64]
dark-hl	UPREGULATED	-3.052	1	09120 Genetic Information Processing;09123 Folding, sorting and degradation;04120 Ubiquitin mediated proteolysis;K10688	K10688	UBE2W,	ubiquitin-conjugating enzyme E2 W [EC:2.3.2.25]
dark-hl	UPREGULATED	-1.356	0.955	09120 Genetic Information Processing;09123 Folding, sorting and degradation;04130 SNARE interactions in vesicular transport;K04560	K04560	STX1A	syntaxin 1A
dark-hl	UPREGULATED	-1.532	0.975	09120 Genetic Information Processing;09123 Folding, sorting and degradation;04130 SNARE interactions in vesicular transport;K08489	K08489	STX16	syntaxin 16
dark-hl	UPREGULATED	-2.387	0.999	09120 Genetic Information Processing;09123 Folding, sorting and degradation;04130 SNARE interactions in vesicular transport;K08490	K08490	STX5	syntaxin 5
dark-hl	UPREGULATED	-1.479	0.992	09120 Genetic Information Processing;09123 Folding, sorting and degradation;04130 SNARE interactions in vesicular transport;K08493	K08493	VTI1	vesicle transport through interaction with t-SNAREs 1
dark-hl	UPREGULATED	-1.84	0.987	09120 Genetic Information Processing;09123 Folding, sorting and degradation;04130 SNARE interactions in vesicular transport;K08496	K08496	GOSR2,	golgi SNAP receptor complex member 2
dark-hl	UPREGULATED	-3.413	1	09120 Genetic Information Processing;09123 Folding, sorting and degradation;04130 SNARE interactions in vesicular transport;K08498	K08498	STX6	syntaxin 6
dark-hl	UPREGULATED	-2.368	1	09120 Genetic Information Processing;09123 Folding, sorting and degradation;04130 SNARE interactions in vesicular transport;K08517	K08517	SEC22	vesicle transport protein SEC22
dark-hl	UPREGULATED	-1.866	1	09120 Genetic Information Processing;09123 Folding, sorting and degradation;04141 Protein processing in endoplasmic reticulum;K01230	K01230	MAN1A_C,	mannosyl-oligosaccharide alpha-1,2-mannosidase [EC:3.2.1.113]
dark-hl	UPREGULATED	-2.184	1	09120 Genetic Information Processing;09123 Folding, sorting and degradation;04141 Protein processing in endoplasmic reticulum;K03237	K03237	EIF2S1	translation initiation factor 2 subunit 1
dark-hl	UPREGULATED	-2.359	1	09120 Genetic Information Processing;09123 Folding, sorting and degradation;04141 Protein processing in endoplasmic reticulum;K03283	K03283	HSPA1_6_8	heat shock 70kDa protein 1/6/8
dark-hl	UPREGULATED	-3.844	1	09120 Genetic Information Processing;09123 Folding, sorting and degradation;04141 Protein processing in endoplasmic reticulum;K04079	K04079	HSP90A,	molecular chaperone HtpG
dark-hl	UPREGULATED	-2.222	1	09120 Genetic Information Processing;09123 Folding, sorting and degradation;04141 Protein processing in endoplasmic reticulum;K04554	K04554	UBE2J2,	ubiquitin-conjugating enzyme E2 J2 [EC:2.3.2.23]
dark-hl	UPREGULATED	-3.495	1	09120 Genetic Information Processing;09123 Folding, sorting and degradation;04141 Protein processing in endoplasmic reticulum;K07151	K07151	STT3	dolichyl-diphosphooligosaccharide---protein glycosyltransferase [EC:2.4.99.18]
dark-hl	UPREGULATED	-2.714	1	09120 Genetic Information Processing;09123 Folding, sorting and degradation;04141 Protein processing in endoplasmic reticulum;K07342	K07342	SEC61G,	protein transport protein SEC61 subunit gamma and related proteins
dark-hl	UPREGULATED	-2.624	1	09120 Genetic Information Processing;09123 Folding, sorting and degradation;04141 Protein processing in endoplasmic reticulum;K07953	K07953	SAR1	GTP-binding protein SAR1 [EC:3.6.5.-]
dark-hl	UPREGULATED	-1.992	1	09120 Genetic Information Processing;09123 Folding, sorting and degradation;04141 Protein processing in endoplasmic reticulum;K08054	K08054	CANX	calnexin
dark-hl	UPREGULATED	-2.671	1	09120 Genetic Information Processing;09123 Folding, sorting and degradation;04141 Protein processing in endoplasmic reticulum;K08057	K08057	CALR	calreticulin
dark-hl	UPREGULATED	-3.262	1	09120 Genetic Information Processing;09123 Folding, sorting and degradation;04141 Protein processing in endoplasmic reticulum;K08288	K08288	PRKCSH	protein kinase C substrate 80K-H
dark-hl	UPREGULATED	-1.112	0.995	09120 Genetic Information Processing;09123 Folding, sorting and degradation;04141 Protein processing in endoplasmic reticulum;K09481	K09481	SEC61B,	protein transport protein SEC61 subunit beta
dark-hl	UPREGULATED	-1.164	1	09120 Genetic Information Processing;09123 Folding, sorting and degradation;04141 Protein processing in endoplasmic reticulum;K09485	K09485	HSP110	heat shock protein 110kDa
dark-hl	UPREGULATED	-3.737	1	09120 Genetic Information Processing;09123 Folding, sorting and degradation;04141 Protein processing in endoplasmic reticulum;K09487	K09487	HSP90B,	heat shock protein 90kDa beta
dark-hl	UPREGULATED	-1.833	1	09120 Genetic Information Processing;09123 Folding, sorting and degradation;04141 Protein processing in endoplasmic reticulum;K09490	K09490	HSPA5,	endoplasmic reticulum chaperone BiP [EC:3.6.4.10]
dark-hl	UPREGULATED	-2.684	1	09120 Genetic Information Processing;09123 Folding, sorting and degradation;04141 Protein processing in endoplasmic reticulum;K09502	K09502	DNAJA1	DnaJ homolog subfamily A member 1
dark-hl	UPREGULATED	-1.948	1	09120 Genetic Information Processing;09123 Folding, sorting and degradation;04141 Protein processing in endoplasmic reticulum;K09503	K09503	DNAJA2	DnaJ homolog subfamily A member 2
dark-hl	UPREGULATED	-2.701	1	09120 Genetic Information Processing;09123 Folding, sorting and degradation;04141 Protein processing in endoplasmic reticulum;K09517	K09517	DNAJB11	DnaJ homolog subfamily B member 11
dark-hl	UPREGULATED	-3.02	1	09120 Genetic Information Processing;09123 Folding, sorting and degradation;04141 Protein processing in endoplasmic reticulum;K09584	K09584	PDIA6,	protein disulfide-isomerase A6 [EC:5.3.4.1]
dark-hl	UPREGULATED	-1.754	1	09120 Genetic Information Processing;09123 Folding, sorting and degradation;04141 Protein processing in endoplasmic reticulum;K09586	K09586	ERP29	endoplasmic reticulum protein 29
dark-hl	UPREGULATED	-3.352	1	09120 Genetic Information Processing;09123 Folding, sorting and degradation;04141 Protein processing in endoplasmic reticulum;K10080	K10080	LMAN1,	lectin, mannose-binding 1
dark-hl	UPREGULATED	-3.792	1	09120 Genetic Information Processing;09123 Folding, sorting and degradation;04141 Protein processing in endoplasmic reticulum;K10081	K10081	LMAN1L,	lectin, mannose-binding 1-like
dark-hl	UPREGULATED	-3.352	1	09120 Genetic Information Processing;09123 Folding, sorting and degradation;04141 Protein processing in endoplasmic reticulum;K10082	K10082	LMAN2,	lectin, mannose-binding 2
dark-hl	UPREGULATED	-2.474	0.999	09120 Genetic Information Processing;09123 Folding, sorting and degradation;04141 Protein processing in endoplasmic reticulum;K10084	K10084	EDEM1	ER degradation enhancer, mannosidase alpha-like 1
dark-hl	UPREGULATED	-2.474	0.999	09120 Genetic Information Processing;09123 Folding, sorting and degradation;04141 Protein processing in endoplasmic reticulum;K10085	K10085	EDEM2	ER degradation enhancer, mannosidase alpha-like 2
dark-hl	UPREGULATED	-2.199	0.999	09120 Genetic Information Processing;09123 Folding, sorting and degradation;04141 Protein processing in endoplasmic reticulum;K10601	K10601	SYVN1,	E3 ubiquitin-protein ligase synoviolin [EC:2.3.2.27]
dark-hl	UPREGULATED	-3.84	1	09120 Genetic Information Processing;09123 Folding, sorting and degradation;04141 Protein processing in endoplasmic reticulum;K10956	K10956	SEC61A	protein transport protein SEC61 subunit alpha
dark-hl	UPREGULATED	-1.726	0.998	09120 Genetic Information Processing;09123 Folding, sorting and degradation;04141 Protein processing in endoplasmic reticulum;K11718	K11718	HUGT	UDP-glucose:glycoprotein glucosyltransferase [EC:2.4.1.-]
dark-hl	UPREGULATED	-2.917	1	09120 Genetic Information Processing;09123 Folding, sorting and degradation;04141 Protein processing in endoplasmic reticulum;K12275	K12275	SEC62	translocation protein SEC62
dark-hl	UPREGULATED	-2.017	0.99	09120 Genetic Information Processing;09123 Folding, sorting and degradation;04141 Protein processing in endoplasmic reticulum;K12669	K12669	OST3_6	dolichyl-diphosphooligosaccharide---protein glycosyltransferase subunit 3/6
dark-hl	UPREGULATED	-1.296	1	09120 Genetic Information Processing;09123 Folding, sorting and degradation;04141 Protein processing in endoplasmic reticulum;K13525	K13525	VCP,	transitional endoplasmic reticulum ATPase
dark-hl	UPREGULATED	-3.716	1	09120 Genetic Information Processing;09123 Folding, sorting and degradation;04141 Protein processing in endoplasmic reticulum;K13984	K13984	TXNDC5,	thioredoxin domain-containing protein 5 [EC:5.3.4.1]
dark-hl	UPREGULATED	-2.189	1	09120 Genetic Information Processing;09123 Folding, sorting and degradation;04141 Protein processing in endoplasmic reticulum;K13989	K13989	DERL2_3	Derlin-2/3
dark-hl	UPREGULATED	-2.141	1	09120 Genetic Information Processing;09123 Folding, sorting and degradation;04141 Protein processing in endoplasmic reticulum;K14005	K14005	SEC31	protein transport protein SEC31
dark-hl	UPREGULATED	-2.402	1	09120 Genetic Information Processing;09123 Folding, sorting and degradation;04141 Protein processing in endoplasmic reticulum;K14006	K14006	SEC23	protein transport protein SEC23
dark-hl	UPREGULATED	-2.139	1	09120 Genetic Information Processing;09123 Folding, sorting and degradation;04141 Protein processing in endoplasmic reticulum;K14007	K14007	SEC24	protein transport protein SEC24
dark-hl	UPREGULATED	-1.438	0.991	09120 Genetic Information Processing;09123 Folding, sorting and degradation;04141 Protein processing in endoplasmic reticulum;K14012	K14012	NSFL1C,	UBX domain-containing protein 1
dark-hl	UPREGULATED	-1.301	0.964	09120 Genetic Information Processing;09123 Folding, sorting and degradation;04141 Protein processing in endoplasmic reticulum;K14015	K14015	NPLOC4,	nuclear protein localization protein 4
dark-hl	UPREGULATED	-1.937	1	09120 Genetic Information Processing;09124 Replication and repair;03030 DNA replication;K02325	K02325	POLE2	DNA polymerase epsilon subunit 2 [EC:2.7.7.7]
dark-hl	UPREGULATED	-1.93	0.987	09120 Genetic Information Processing;09124 Replication and repair;03030 DNA replication;K02326	K02326	POLE3	DNA polymerase epsilon subunit 3 [EC:2.7.7.7]
dark-hl	UPREGULATED	-1.641	1	09120 Genetic Information Processing;09124 Replication and repair;03030 DNA replication;K04802	K04802	PCNA	proliferating cell nuclear antigen
dark-hl	UPREGULATED	-3.685	1	09120 Genetic Information Processing;09124 Replication and repair;03030 DNA replication;K07466	K07466	RFA1,	replication factor A1
dark-hl	UPREGULATED	-1.438	0.991	09120 Genetic Information Processing;09124 Replication and repair;03030 DNA replication;K10742	K10742	DNA2	DNA replication ATP-dependent helicase/nuclease Dna2 [EC:5.6.2.3 3.1.-.-]
dark-hl	UPREGULATED	-1.891	0.991	09120 Genetic Information Processing;09124 Replication and repair;03030 DNA replication;K10754	K10754	RFC1	replication factor C subunit 1
dark-hl	UPREGULATED	-1.301	0.964	09120 Genetic Information Processing;09124 Replication and repair;03030 DNA replication;K10755	K10755	RFC2_4	replication factor C subunit 2/4
dark-hl	UPREGULATED	-1.937	1	09120 Genetic Information Processing;09124 Replication and repair;03410 Base excision repair;K02325	K02325	POLE2	DNA polymerase epsilon subunit 2 [EC:2.7.7.7]
dark-hl	UPREGULATED	-1.93	0.987	09120 Genetic Information Processing;09124 Replication and repair;03410 Base excision repair;K02326	K02326	POLE3	DNA polymerase epsilon subunit 3 [EC:2.7.7.7]
dark-hl	UPREGULATED	-2.559	1	09120 Genetic Information Processing;09124 Replication and repair;03410 Base excision repair;K03660	K03660	OGG1	N-glycosylase/DNA lyase [EC:3.2.2.- 4.2.99.18]
dark-hl	UPREGULATED	-1.641	1	09120 Genetic Information Processing;09124 Replication and repair;03410 Base excision repair;K04802	K04802	PCNA	proliferating cell nuclear antigen
dark-hl	UPREGULATED	-1.891	0.991	09120 Genetic Information Processing;09124 Replication and repair;03410 Base excision repair;K10754	K10754	RFC1	replication factor C subunit 1
dark-hl	UPREGULATED	-1.301	0.964	09120 Genetic Information Processing;09124 Replication and repair;03410 Base excision repair;K10755	K10755	RFC2_4	replication factor C subunit 2/4
dark-hl	UPREGULATED	-1.952	1	09120 Genetic Information Processing;09124 Replication and repair;03410 Base excision repair;K10798	K10798	PARP2_3_4	poly [ADP-ribose] polymerase 2/3/4 [EC:2.4.2.30]
dark-hl	UPREGULATED	-1.937	1	09120 Genetic Information Processing;09124 Replication and repair;03420 Nucleotide excision repair;K02325	K02325	POLE2	DNA polymerase epsilon subunit 2 [EC:2.7.7.7]
dark-hl	UPREGULATED	-1.93	0.987	09120 Genetic Information Processing;09124 Replication and repair;03420 Nucleotide excision repair;K02326	K02326	POLE3	DNA polymerase epsilon subunit 3 [EC:2.7.7.7]
dark-hl	UPREGULATED	-1.446	0.988	09120 Genetic Information Processing;09124 Replication and repair;03420 Nucleotide excision repair;K03006	K03006	RPB1,	DNA-directed RNA polymerase II subunit RPB1 [EC:2.7.7.6]
dark-hl	UPREGULATED	-4.796	1	09120 Genetic Information Processing;09124 Replication and repair;03420 Nucleotide excision repair;K03010	K03010	RPB2,	DNA-directed RNA polymerase II subunit RPB2 [EC:2.7.7.6]
dark-hl	UPREGULATED	-1.47	1	09120 Genetic Information Processing;09124 Replication and repair;03420 Nucleotide excision repair;K03013	K03013	RPABC1,	DNA-directed RNA polymerases I, II, and III subunit RPABC1
dark-hl	UPREGULATED	-2.501	1	09120 Genetic Information Processing;09124 Replication and repair;03420 Nucleotide excision repair;K03014	K03014	RPABC2,	DNA-directed RNA polymerases I, II, and III subunit RPABC2
dark-hl	UPREGULATED	-3.02	1	09120 Genetic Information Processing;09124 Replication and repair;03420 Nucleotide excision repair;K03015	K03015	RPB7,	DNA-directed RNA polymerase II subunit RPB7
dark-hl	UPREGULATED	-2.074	1	09120 Genetic Information Processing;09124 Replication and repair;03420 Nucleotide excision repair;K03016	K03016	RPABC3,	DNA-directed RNA polymerases I, II, and III subunit RPABC3
dark-hl	UPREGULATED	-1.145	0.97	09120 Genetic Information Processing;09124 Replication and repair;03420 Nucleotide excision repair;K03017	K03017	RPB9,	DNA-directed RNA polymerase II subunit RPB9
dark-hl	UPREGULATED	-1.641	1	09120 Genetic Information Processing;09124 Replication and repair;03420 Nucleotide excision repair;K04802	K04802	PCNA	proliferating cell nuclear antigen
dark-hl	UPREGULATED	-3.685	1	09120 Genetic Information Processing;09124 Replication and repair;03420 Nucleotide excision repair;K07466	K07466	RFA1,	replication factor A1
dark-hl	UPREGULATED	-1.549	0.991	09120 Genetic Information Processing;09124 Replication and repair;03420 Nucleotide excision repair;K10610	K10610	DDB1	DNA damage-binding protein 1
dark-hl	UPREGULATED	-1.891	0.991	09120 Genetic Information Processing;09124 Replication and repair;03420 Nucleotide excision repair;K10754	K10754	RFC1	replication factor C subunit 1
dark-hl	UPREGULATED	-1.301	0.964	09120 Genetic Information Processing;09124 Replication and repair;03420 Nucleotide excision repair;K10755	K10755	RFC2_4	replication factor C subunit 2/4
dark-hl	UPREGULATED	-1.641	1	09120 Genetic Information Processing;09124 Replication and repair;03430 Mismatch repair;K04802	K04802	PCNA	proliferating cell nuclear antigen
dark-hl	UPREGULATED	-3.685	1	09120 Genetic Information Processing;09124 Replication and repair;03430 Mismatch repair;K07466	K07466	RFA1,	replication factor A1
dark-hl	UPREGULATED	-1.93	0.987	09120 Genetic Information Processing;09124 Replication and repair;03430 Mismatch repair;K08736	K08736	MSH3	DNA mismatch repair protein MSH3
dark-hl	UPREGULATED	-1.891	0.991	09120 Genetic Information Processing;09124 Replication and repair;03430 Mismatch repair;K10754	K10754	RFC1	replication factor C subunit 1
dark-hl	UPREGULATED	-1.301	0.964	09120 Genetic Information Processing;09124 Replication and repair;03430 Mismatch repair;K10755	K10755	RFC2_4	replication factor C subunit 2/4
dark-hl	UPREGULATED	-3.685	1	09120 Genetic Information Processing;09124 Replication and repair;03440 Homologous recombination;K07466	K07466	RFA1,	replication factor A1
dark-hl	UPREGULATED	-1.939	1	09120 Genetic Information Processing;09124 Replication and repair;03440 Homologous recombination;K10683	K10683	BARD1	BRCA1-associated RING domain protein 1
dark-hl	UPREGULATED	-2.132	0.999	09120 Genetic Information Processing;09124 Replication and repair;03440 Homologous recombination;K10882	K10882	EME1,	crossover junction endonuclease EME1 [EC:3.1.22.-]
dark-hl	UPREGULATED	-3.685	1	09120 Genetic Information Processing;09124 Replication and repair;03460 Fanconi anemia pathway;K07466	K07466	RFA1,	replication factor A1
dark-hl	UPREGULATED	-2.132	0.999	09120 Genetic Information Processing;09124 Replication and repair;03460 Fanconi anemia pathway;K10882	K10882	EME1,	crossover junction endonuclease EME1 [EC:3.1.22.-]
dark-hl	UPREGULATED	-1.459	0.995	09120 Genetic Information Processing;09124 Replication and repair;03460 Fanconi anemia pathway;K11511	K11511	APITD1,	centromere protein S
dark-hl	UPREGULATED	-2.495	1	09120 Genetic Information Processing;09125 Information processing in viruses;03250 Viral life cycle - HIV-1;K03767	K03767	PPIA	peptidyl-prolyl cis-trans isomerase A (cyclophilin A) [EC:5.2.1.8]
dark-hl	UPREGULATED	-1.511	1	09120 Genetic Information Processing;09125 Information processing in viruses;03250 Viral life cycle - HIV-1;K07936	K07936	RAN	GTP-binding nuclear protein Ran
dark-hl	UPREGULATED	-2.625	1	09120 Genetic Information Processing;09125 Information processing in viruses;03250 Viral life cycle - HIV-1;K11648	K11648	SMARCB1,	SWI/SNF-related matrix-associated actin-dependent regulator of chromatin subfamily B member 1
dark-hl	UPREGULATED	-2.004	0.999	09120 Genetic Information Processing;09125 Information processing in viruses;03250 Viral life cycle - HIV-1;K15171	K15171	SUPT4H1,	transcription elongation factor SPT4
dark-hl	UPREGULATED	-2.963	1	09120 Genetic Information Processing;09125 Information processing in viruses;03250 Viral life cycle - HIV-1;K18739	K18739	BICD	protein bicaudal D
dark-hl	UPREGULATED	-2.742	1	09120 Genetic Information Processing;09125 Information processing in viruses;03266 Virion - Herpesvirus;K01408	K01408	IDE,	insulysin [EC:3.4.24.56]
dark-hl	UPREGULATED	-1.93	0.987	09120 Genetic Information Processing;09126 Chromosome;03082 ATP-dependent chromatin remodeling;K02326	K02326	POLE3	DNA polymerase epsilon subunit 3 [EC:2.7.7.7]
dark-hl	UPREGULATED	-1.272	0.983	09120 Genetic Information Processing;09126 Chromosome;03082 ATP-dependent chromatin remodeling;K06067	K06067	HDAC1_2	histone deacetylase 1/2 [EC:3.5.1.98]
dark-hl	UPREGULATED	-3.088	1	09120 Genetic Information Processing;09126 Chromosome;03082 ATP-dependent chromatin remodeling;K09201	K09201	YY	transcription factor YY
dark-hl	UPREGULATED	-2.625	1	09120 Genetic Information Processing;09126 Chromosome;03082 ATP-dependent chromatin remodeling;K11648	K11648	SMARCB1,	SWI/SNF-related matrix-associated actin-dependent regulator of chromatin subfamily B member 1
dark-hl	UPREGULATED	-3.584	1	09120 Genetic Information Processing;09126 Chromosome;03082 ATP-dependent chromatin remodeling;K11649	K11649	SMARCC	SWI/SNF-related matrix-associated actin-dependent regulator of chromatin subfamily C
dark-hl	UPREGULATED	-2.726	1	09120 Genetic Information Processing;09126 Chromosome;03082 ATP-dependent chromatin remodeling;K11654	K11654	SMARCA5,	SWI/SNF-related matrix-associated actin-dependent regulator of chromatin subfamily A member 5 [EC:5.6.2.-]
dark-hl	UPREGULATED	-1.84	0.987	09120 Genetic Information Processing;09126 Chromosome;03082 ATP-dependent chromatin remodeling;K13196	K13196	DPF2,	zinc finger protein ubi-d4
dark-hl	UPREGULATED	-2.906	1	09120 Genetic Information Processing;09126 Chromosome;03083 Polycomb repressive complex;K03115	K03115	CSNK2B	casein kinase II subunit beta
dark-hl	UPREGULATED	-1.272	0.983	09120 Genetic Information Processing;09126 Chromosome;03083 Polycomb repressive complex;K06067	K06067	HDAC1_2	histone deacetylase 1/2 [EC:3.5.1.98]
dark-hl	UPREGULATED	-3.088	1	09120 Genetic Information Processing;09126 Chromosome;03083 Polycomb repressive complex;K09201	K09201	YY	transcription factor YY
dark-hl	UPREGULATED	-1.885	0.989	09120 Genetic Information Processing;09126 Chromosome;03083 Polycomb repressive complex;K11586	K11586	CBX3,	chromobox protein 3
dark-hl	UPREGULATED	-1.106	0.968	09130 Environmental Information Processing;09131 Membrane transport;02010 ABC transporters;K02048	K02048	cysP	sulfate/thiosulfate transport system substrate-binding protein
dark-hl	UPREGULATED	-1.895	1	09130 Environmental Information Processing;09131 Membrane transport;02010 ABC transporters;K05654	K05654	ABCB3,	ATP-binding cassette, subfamily B (MDR/TAP), member 3 [EC:7.4.2.14]
dark-hl	UPREGULATED	-1.24	0.994	09130 Environmental Information Processing;09131 Membrane transport;02010 ABC transporters;K05655	K05655	ABCB8	ATP-binding cassette, subfamily B (MDR/TAP), member 8
dark-hl	UPREGULATED	-2.1	0.994	09130 Environmental Information Processing;09131 Membrane transport;02010 ABC transporters;K05681	K05681	ABCG2,	ATP-binding cassette, subfamily G (WHITE), member 2
dark-hl	UPREGULATED	-1.437	1	09130 Environmental Information Processing;09131 Membrane transport;03070 Bacterial secretion system;K03106	K03106	SRP54,	signal recognition particle subunit SRP54 [EC:3.6.5.4]
dark-hl	UPREGULATED	-2.077	1	09130 Environmental Information Processing;09131 Membrane transport;03070 Bacterial secretion system;K03217	K03217	yidC,	YidC/Oxa1 family membrane protein insertase
dark-hl	UPREGULATED	-2.726	1	09130 Environmental Information Processing;09132 Signal transduction;02020 Two-component system;K08738	K08738	CYC	cytochrome c
dark-hl	UPREGULATED	-2.359	1	09130 Environmental Information Processing;09132 Signal transduction;04010 MAPK signaling pathway;K03283	K03283	HSPA1_6_8	heat shock 70kDa protein 1/6/8
dark-hl	UPREGULATED	-1.84	0.987	09130 Environmental Information Processing;09132 Signal transduction;04010 MAPK signaling pathway;K04459	K04459	DUSP,	dual specificity MAP kinase phosphatase [EC:3.1.3.16 3.1.3.48]
dark-hl	UPREGULATED	-2.625	1	09130 Environmental Information Processing;09132 Signal transduction;04010 MAPK signaling pathway;K08053	K08053	RASA2,	Ras GTPase-activating protein 2
dark-hl	UPREGULATED	-3.685	1	09130 Environmental Information Processing;09132 Signal transduction;04011 MAPK signaling pathway - yeast;K00889	K00889	PIP5K	1-phosphatidylinositol-4-phosphate 5-kinase [EC:2.7.1.68]
dark-hl	UPREGULATED	-3.244	1	09130 Environmental Information Processing;09132 Signal transduction;04011 MAPK signaling pathway - yeast;K02218	K02218	CSNK1,	casein kinase 1 [EC:2.7.11.1]
dark-hl	UPREGULATED	-2.579	0.999	09130 Environmental Information Processing;09132 Signal transduction;04011 MAPK signaling pathway - yeast;K02516	K02516	PRMT5,	type II protein arginine methyltransferase [EC:2.1.1.320]
dark-hl	UPREGULATED	-1.999	1	09130 Environmental Information Processing;09132 Signal transduction;04011 MAPK signaling pathway - yeast;K04536	K04536	GNB1	guanine nucleotide-binding protein G(I)/G(S)/G(T) subunit beta-1
dark-hl	UPREGULATED	-1.752	0.995	09130 Environmental Information Processing;09132 Signal transduction;04011 MAPK signaling pathway - yeast;K06276	K06276	PDPK1	3-phosphoinositide dependent protein kinase-1 [EC:2.7.11.1]
dark-hl	UPREGULATED	-1.794	0.997	09130 Environmental Information Processing;09132 Signal transduction;04011 MAPK signaling pathway - yeast;K12412	K12412	MCM1	pheromone receptor transcription factor
dark-hl	UPREGULATED	-3.105	1	09130 Environmental Information Processing;09132 Signal transduction;04014 Ras signaling pathway;K02183	K02183	CALM	calmodulin
dark-hl	UPREGULATED	-1.999	1	09130 Environmental Information Processing;09132 Signal transduction;04014 Ras signaling pathway;K04536	K04536	GNB1	guanine nucleotide-binding protein G(I)/G(S)/G(T) subunit beta-1
dark-hl	UPREGULATED	-2.625	1	09130 Environmental Information Processing;09132 Signal transduction;04014 Ras signaling pathway;K08053	K08053	RASA2,	Ras GTPase-activating protein 2
dark-hl	UPREGULATED	-3.105	1	09130 Environmental Information Processing;09132 Signal transduction;04015 Rap1 signaling pathway;K02183	K02183	CALM	calmodulin
dark-hl	UPREGULATED	-3.938	1	09130 Environmental Information Processing;09132 Signal transduction;04015 Rap1 signaling pathway;K06271	K06271	TLN	talin
dark-hl	UPREGULATED	-3.584	1	09130 Environmental Information Processing;09132 Signal transduction;04015 Rap1 signaling pathway;K17697	K17697	DOCK4	dedicator of cytokinesis protein 4
dark-hl	UPREGULATED	-1.823	0.994	09130 Environmental Information Processing;09132 Signal transduction;04016 MAPK signaling pathway - plant;K00940	K00940	ndk,	nucleoside-diphosphate kinase [EC:2.7.4.6]
dark-hl	UPREGULATED	-3.105	1	09130 Environmental Information Processing;09132 Signal transduction;04016 MAPK signaling pathway - plant;K02183	K02183	CALM	calmodulin
dark-hl	UPREGULATED	-1.191	0.962	09130 Environmental Information Processing;09132 Signal transduction;04016 MAPK signaling pathway - plant;K13449	K13449	PR1	pathogenesis-related protein 1
dark-hl	UPREGULATED	-2.332	1	09130 Environmental Information Processing;09132 Signal transduction;04016 MAPK signaling pathway - plant;K14498	K14498	SNRK2	serine/threonine-protein kinase SRK2 [EC:2.7.11.1]
dark-hl	UPREGULATED	-1.66	0.979	09130 Environmental Information Processing;09132 Signal transduction;04016 MAPK signaling pathway - plant;K20718	K20718	ER	LRR receptor-like serine/threonine-protein kinase ERECTA [EC:2.7.11.1]
dark-hl	UPREGULATED	-3.105	1	09130 Environmental Information Processing;09132 Signal transduction;04020 Calcium signaling pathway;K02183	K02183	CALM	calmodulin
dark-hl	UPREGULATED	-2.292	0.997	09130 Environmental Information Processing;09132 Signal transduction;04020 Calcium signaling pathway;K05215	K05215	P2RX1	P2X purinoceptor 1
dark-hl	UPREGULATED	-2.292	0.997	09130 Environmental Information Processing;09132 Signal transduction;04020 Calcium signaling pathway;K05218	K05218	P2RX4	P2X purinoceptor 4
dark-hl	UPREGULATED	-3.761	1	09130 Environmental Information Processing;09132 Signal transduction;04020 Calcium signaling pathway;K05853	K05853	ATP2A	P-type Ca2+ transporter type 2A [EC:7.2.2.10]
dark-hl	UPREGULATED	-2.495	1	09130 Environmental Information Processing;09132 Signal transduction;04020 Calcium signaling pathway;K09565	K09565	PPIF	peptidyl-prolyl isomerase F (cyclophilin D) [EC:5.2.1.8]
dark-hl	UPREGULATED	-3.105	1	09130 Environmental Information Processing;09132 Signal transduction;04022 cGMP-PKG signaling pathway;K02183	K02183	CALM	calmodulin
dark-hl	UPREGULATED	-3.761	1	09130 Environmental Information Processing;09132 Signal transduction;04022 cGMP-PKG signaling pathway;K05853	K05853	ATP2A	P-type Ca2+ transporter type 2A [EC:7.2.2.10]
dark-hl	UPREGULATED	-2.765	1	09130 Environmental Information Processing;09132 Signal transduction;04022 cGMP-PKG signaling pathway;K06269	K06269	PPP1C	serine/threonine-protein phosphatase PP1 catalytic subunit [EC:3.1.3.16]
dark-hl	UPREGULATED	-2.495	1	09130 Environmental Information Processing;09132 Signal transduction;04022 cGMP-PKG signaling pathway;K09565	K09565	PPIF	peptidyl-prolyl isomerase F (cyclophilin D) [EC:5.2.1.8]
dark-hl	UPREGULATED	-3.105	1	09130 Environmental Information Processing;09132 Signal transduction;04024 cAMP signaling pathway;K02183	K02183	CALM	calmodulin
dark-hl	UPREGULATED	-1.69	0.97	09130 Environmental Information Processing;09132 Signal transduction;04024 cAMP signaling pathway;K04615	K04615	GABBR	gamma-aminobutyric acid type B receptor
dark-hl	UPREGULATED	-3.761	1	09130 Environmental Information Processing;09132 Signal transduction;04024 cAMP signaling pathway;K05853	K05853	ATP2A	P-type Ca2+ transporter type 2A [EC:7.2.2.10]
dark-hl	UPREGULATED	-2.765	1	09130 Environmental Information Processing;09132 Signal transduction;04024 cAMP signaling pathway;K06269	K06269	PPP1C	serine/threonine-protein phosphatase PP1 catalytic subunit [EC:3.1.3.16]
dark-hl	UPREGULATED	-2.906	1	09130 Environmental Information Processing;09132 Signal transduction;04064 NF-kappa B signaling pathway;K03115	K03115	CSNK2B	casein kinase II subunit beta
dark-hl	UPREGULATED	-2.209	1	09130 Environmental Information Processing;09132 Signal transduction;04064 NF-kappa B signaling pathway;K10130	K10130	LRDD,	leucine-rich repeats and death domain-containing protein
dark-hl	UPREGULATED	-1.064	0.965	09130 Environmental Information Processing;09132 Signal transduction;04064 NF-kappa B signaling pathway;K10577	K10577	UBE2I,	ubiquitin-conjugating enzyme E2 I
dark-hl	UPREGULATED	-3.83	1	09130 Environmental Information Processing;09132 Signal transduction;04066 HIF-1 signaling pathway;K00134	K00134	GAPDH,	glyceraldehyde 3-phosphate dehydrogenase (phosphorylating) [EC:1.2.1.12]
dark-hl	UPREGULATED	-2.776	1	09130 Environmental Information Processing;09132 Signal transduction;04066 HIF-1 signaling pathway;K00161	K00161	PDHA,	pyruvate dehydrogenase E1 component subunit alpha [EC:1.2.4.1]
dark-hl	UPREGULATED	-3.162	1	09130 Environmental Information Processing;09132 Signal transduction;04066 HIF-1 signaling pathway;K00162	K00162	PDHB,	pyruvate dehydrogenase E1 component subunit beta [EC:1.2.4.1]
dark-hl	UPREGULATED	-4.761	1	09130 Environmental Information Processing;09132 Signal transduction;04066 HIF-1 signaling pathway;K00927	K00927	PGK,	phosphoglycerate kinase [EC:2.7.2.3]
dark-hl	UPREGULATED	-2.474	0.999	09130 Environmental Information Processing;09132 Signal transduction;04066 HIF-1 signaling pathway;K01103	K01103	PFKFB3	6-phosphofructo-2-kinase / fructose-2,6-biphosphatase 3 [EC:2.7.1.105 3.1.3.46]
dark-hl	UPREGULATED	-1.752	0.995	09130 Environmental Information Processing;09132 Signal transduction;04066 HIF-1 signaling pathway;K01623	K01623	ALDO	fructose-bisphosphate aldolase, class I [EC:4.1.2.13]
dark-hl	UPREGULATED	-2.332	1	09130 Environmental Information Processing;09132 Signal transduction;04066 HIF-1 signaling pathway;K02991	K02991	RP-S6e,	small subunit ribosomal protein S6e
dark-hl	UPREGULATED	-2.846	1	09130 Environmental Information Processing;09132 Signal transduction;04066 HIF-1 signaling pathway;K03259	K03259	EIF4E	translation initiation factor 4E
dark-hl	UPREGULATED	-1.752	0.995	09130 Environmental Information Processing;09132 Signal transduction;04068 FoxO signaling pathway;K06276	K06276	PDPK1	3-phosphoinositide dependent protein kinase-1 [EC:2.7.11.1]
dark-hl	UPREGULATED	-1.8	1	09130 Environmental Information Processing;09132 Signal transduction;04068 FoxO signaling pathway;K06643	K06643	MDM2	E3 ubiquitin-protein ligase Mdm2 [EC:2.3.2.27]
dark-hl	UPREGULATED	-1.702	1	09130 Environmental Information Processing;09132 Signal transduction;04068 FoxO signaling pathway;K08341	K08341	GABARAP,	GABA(A) receptor-associated protein
dark-hl	UPREGULATED	-3.685	1	09130 Environmental Information Processing;09132 Signal transduction;04070 Phosphatidylinositol signaling system;K00889	K00889	PIP5K	1-phosphatidylinositol-4-phosphate 5-kinase [EC:2.7.1.68]
dark-hl	UPREGULATED	-2.831	1	09130 Environmental Information Processing;09132 Signal transduction;04070 Phosphatidylinositol signaling system;K00901	K00901	dgkA,	diacylglycerol kinase (ATP) [EC:2.7.1.107]
dark-hl	UPREGULATED	-2.811	1	09130 Environmental Information Processing;09132 Signal transduction;04070 Phosphatidylinositol signaling system;K01092	K01092	E3.1.3.25,	myo-inositol-1(or 4)-monophosphatase [EC:3.1.3.25]
dark-hl	UPREGULATED	-3.105	1	09130 Environmental Information Processing;09132 Signal transduction;04070 Phosphatidylinositol signaling system;K02183	K02183	CALM	calmodulin
dark-hl	UPREGULATED	-2.811	1	09130 Environmental Information Processing;09132 Signal transduction;04070 Phosphatidylinositol signaling system;K10047	K10047	VTC4	inositol-phosphate phosphatase / L-galactose 1-phosphate phosphatase [EC:3.1.3.25 3.1.3.93]
dark-hl	UPREGULATED	-2.432	0.999	09130 Environmental Information Processing;09132 Signal transduction;04070 Phosphatidylinositol signaling system;K20279	K20279	SYNJ	synaptojanin [EC:3.1.3.36]
dark-hl	UPREGULATED	-3.938	1	09130 Environmental Information Processing;09132 Signal transduction;04071 Sphingolipid signaling pathway;K00654	K00654	SPT	serine palmitoyltransferase [EC:2.3.1.50]
dark-hl	UPREGULATED	-1.222	0.967	09130 Environmental Information Processing;09132 Signal transduction;04071 Sphingolipid signaling pathway;K01379	K01379	CTSD	cathepsin D [EC:3.4.23.5]
dark-hl	UPREGULATED	-2.344	1	09130 Environmental Information Processing;09132 Signal transduction;04071 Sphingolipid signaling pathway;K04710	K04710	CERS1,	sphingoid base N-stearoyltransferase [EC:2.3.1.299]
dark-hl	UPREGULATED	-3.938	1	09130 Environmental Information Processing;09132 Signal transduction;04071 Sphingolipid signaling pathway;K04716	K04716	SGPP1	sphingosine-1-phosphate phosphatase 1 [EC:3.1.3.-]
dark-hl	UPREGULATED	-3.938	1	09130 Environmental Information Processing;09132 Signal transduction;04071 Sphingolipid signaling pathway;K04717	K04717	SGPP2	sphingosine-1-phosphate phosphotase 2 [EC:3.1.3.-]
dark-hl	UPREGULATED	-1.752	0.995	09130 Environmental Information Processing;09132 Signal transduction;04071 Sphingolipid signaling pathway;K06276	K06276	PDPK1	3-phosphoinositide dependent protein kinase-1 [EC:2.7.11.1]
dark-hl	UPREGULATED	-3.685	1	09130 Environmental Information Processing;09132 Signal transduction;04072 Phospholipase D signaling pathway;K00889	K00889	PIP5K	1-phosphatidylinositol-4-phosphate 5-kinase [EC:2.7.1.68]
dark-hl	UPREGULATED	-2.831	1	09130 Environmental Information Processing;09132 Signal transduction;04072 Phospholipase D signaling pathway;K00901	K00901	dgkA,	diacylglycerol kinase (ATP) [EC:2.7.1.107]
dark-hl	UPREGULATED	-1.256	1	09130 Environmental Information Processing;09132 Signal transduction;04072 Phospholipase D signaling pathway;K07937	K07937	ARF1_2	ADP-ribosylation factor 1/2
dark-hl	UPREGULATED	-1.191	0.962	09130 Environmental Information Processing;09132 Signal transduction;04075 Plant hormone signal transduction;K13449	K13449	PR1	pathogenesis-related protein 1
dark-hl	UPREGULATED	-2.332	1	09130 Environmental Information Processing;09132 Signal transduction;04075 Plant hormone signal transduction;K14498	K14498	SNRK2	serine/threonine-protein kinase SRK2 [EC:2.7.11.1]
dark-hl	UPREGULATED	-2.155	0.999	09130 Environmental Information Processing;09132 Signal transduction;04150 mTOR signaling pathway;K02151	K02151	ATPeV1F,	V-type H+-transporting ATPase subunit F
dark-hl	UPREGULATED	-2.332	1	09130 Environmental Information Processing;09132 Signal transduction;04150 mTOR signaling pathway;K02991	K02991	RP-S6e,	small subunit ribosomal protein S6e
dark-hl	UPREGULATED	-2.474	0.999	09130 Environmental Information Processing;09132 Signal transduction;04150 mTOR signaling pathway;K03258	K03258	EIF4B	translation initiation factor 4B
dark-hl	UPREGULATED	-2.846	1	09130 Environmental Information Processing;09132 Signal transduction;04150 mTOR signaling pathway;K03259	K03259	EIF4E	translation initiation factor 4E
dark-hl	UPREGULATED	-1.752	0.995	09130 Environmental Information Processing;09132 Signal transduction;04150 mTOR signaling pathway;K06276	K06276	PDPK1	3-phosphoinositide dependent protein kinase-1 [EC:2.7.11.1]
dark-hl	UPREGULATED	-3.584	1	09130 Environmental Information Processing;09132 Signal transduction;04150 mTOR signaling pathway;K08272	K08272	CAB39,	calcium binding protein 39
dark-hl	UPREGULATED	-1.952	1	09130 Environmental Information Processing;09132 Signal transduction;04150 mTOR signaling pathway;K15728	K15728	LPIN	phosphatidate phosphatase LPIN [EC:3.1.3.4]
dark-hl	UPREGULATED	-2.332	1	09130 Environmental Information Processing;09132 Signal transduction;04151 PI3K-Akt signaling pathway;K02991	K02991	RP-S6e,	small subunit ribosomal protein S6e
dark-hl	UPREGULATED	-2.474	0.999	09130 Environmental Information Processing;09132 Signal transduction;04151 PI3K-Akt signaling pathway;K03258	K03258	EIF4B	translation initiation factor 4B
dark-hl	UPREGULATED	-2.846	1	09130 Environmental Information Processing;09132 Signal transduction;04151 PI3K-Akt signaling pathway;K03259	K03259	EIF4E	translation initiation factor 4E
dark-hl	UPREGULATED	-3.844	1	09130 Environmental Information Processing;09132 Signal transduction;04151 PI3K-Akt signaling pathway;K04079	K04079	HSP90A,	molecular chaperone HtpG
dark-hl	UPREGULATED	-1.999	1	09130 Environmental Information Processing;09132 Signal transduction;04151 PI3K-Akt signaling pathway;K04536	K04536	GNB1	guanine nucleotide-binding protein G(I)/G(S)/G(T) subunit beta-1
dark-hl	UPREGULATED	-2.098	1	09130 Environmental Information Processing;09132 Signal transduction;04151 PI3K-Akt signaling pathway;K05061	K05061	CSF3R,	granulocyte colony-stimulating factor receptor
dark-hl	UPREGULATED	-2.344	1	09130 Environmental Information Processing;09132 Signal transduction;04151 PI3K-Akt signaling pathway;K06252	K06252	TN	tenascin
dark-hl	UPREGULATED	-1.752	0.995	09130 Environmental Information Processing;09132 Signal transduction;04151 PI3K-Akt signaling pathway;K06276	K06276	PDPK1	3-phosphoinositide dependent protein kinase-1 [EC:2.7.11.1]
dark-hl	UPREGULATED	-1.8	1	09130 Environmental Information Processing;09132 Signal transduction;04151 PI3K-Akt signaling pathway;K06643	K06643	MDM2	E3 ubiquitin-protein ligase Mdm2 [EC:2.3.2.27]
dark-hl	UPREGULATED	-3.737	1	09130 Environmental Information Processing;09132 Signal transduction;04151 PI3K-Akt signaling pathway;K09487	K09487	HSP90B,	heat shock protein 90kDa beta
dark-hl	UPREGULATED	-1.965	0.999	09130 Environmental Information Processing;09132 Signal transduction;04151 PI3K-Akt signaling pathway;K09554	K09554	CDC37	cell division cycle protein 37
dark-hl	UPREGULATED	-1.342	1	09130 Environmental Information Processing;09132 Signal transduction;04152 AMPK signaling pathway;K00507	K00507	SCD,	stearoyl-CoA desaturase (Delta-9 desaturase) [EC:1.14.19.1]
dark-hl	UPREGULATED	-2.474	0.999	09130 Environmental Information Processing;09132 Signal transduction;04152 AMPK signaling pathway;K01103	K01103	PFKFB3	6-phosphofructo-2-kinase / fructose-2,6-biphosphatase 3 [EC:2.7.1.105 3.1.3.46]
dark-hl	UPREGULATED	-3.774	1	09130 Environmental Information Processing;09132 Signal transduction;04152 AMPK signaling pathway;K03234	K03234	EEF2	elongation factor 2
dark-hl	UPREGULATED	-1.978	1	09130 Environmental Information Processing;09132 Signal transduction;04152 AMPK signaling pathway;K03841	K03841	FBP,	fructose-1,6-bisphosphatase I [EC:3.1.3.11]
dark-hl	UPREGULATED	-1.752	0.995	09130 Environmental Information Processing;09132 Signal transduction;04152 AMPK signaling pathway;K06276	K06276	PDPK1	3-phosphoinositide dependent protein kinase-1 [EC:2.7.11.1]
dark-hl	UPREGULATED	-1.69	0.97	09130 Environmental Information Processing;09132 Signal transduction;04152 AMPK signaling pathway;K07297	K07297	ADIPOR	adiponectin receptor
dark-hl	UPREGULATED	-2.242	1	09130 Environmental Information Processing;09132 Signal transduction;04152 AMPK signaling pathway;K07901	K07901	RAB8A,	Ras-related protein Rab-8A
dark-hl	UPREGULATED	-3.584	1	09130 Environmental Information Processing;09132 Signal transduction;04152 AMPK signaling pathway;K08272	K08272	CAB39,	calcium binding protein 39
dark-hl	UPREGULATED	-2.393	1	09130 Environmental Information Processing;09132 Signal transduction;04152 AMPK signaling pathway;K11262	K11262	ACACA	acetyl-CoA carboxylase / biotin carboxylase 1 [EC:6.4.1.2 6.3.4.14 2.1.3.15]
dark-hl	UPREGULATED	-2.344	1	09130 Environmental Information Processing;09132 Signal transduction;04310 Wnt signaling pathway;K01691	K01691	WIF1	WNT inhibitory factor 1
dark-hl	UPREGULATED	-2.906	1	09130 Environmental Information Processing;09132 Signal transduction;04310 Wnt signaling pathway;K03115	K03115	CSNK2B	casein kinase II subunit beta
dark-hl	UPREGULATED	-3.571	1	09130 Environmental Information Processing;09132 Signal transduction;04310 Wnt signaling pathway;K04507	K04507	CACYBP,	calcyclin binding protein
dark-hl	UPREGULATED	-1.317	0.993	09130 Environmental Information Processing;09132 Signal transduction;04330 Notch signaling pathway;K06063	K06063	SNW1,	SNW domain-containing protein 1
dark-hl	UPREGULATED	-1.66	0.979	09130 Environmental Information Processing;09132 Signal transduction;04330 Notch signaling pathway;K06065	K06065	NCOR2,	nuclear receptor co-repressor 2
dark-hl	UPREGULATED	-1.272	0.983	09130 Environmental Information Processing;09132 Signal transduction;04330 Notch signaling pathway;K06067	K06067	HDAC1_2	histone deacetylase 1/2 [EC:3.5.1.98]
dark-hl	UPREGULATED	-1.272	0.983	09130 Environmental Information Processing;09132 Signal transduction;04350 TGF-beta signaling pathway;K06067	K06067	HDAC1_2	histone deacetylase 1/2 [EC:3.5.1.98]
dark-hl	UPREGULATED	-3.105	1	09130 Environmental Information Processing;09132 Signal transduction;04371 Apelin signaling pathway;K02183	K02183	CALM	calmodulin
dark-hl	UPREGULATED	-2.332	1	09130 Environmental Information Processing;09132 Signal transduction;04371 Apelin signaling pathway;K02991	K02991	RP-S6e,	small subunit ribosomal protein S6e
dark-hl	UPREGULATED	-1.999	1	09130 Environmental Information Processing;09132 Signal transduction;04371 Apelin signaling pathway;K04536	K04536	GNB1	guanine nucleotide-binding protein G(I)/G(S)/G(T) subunit beta-1
dark-hl	UPREGULATED	-3.165	1	09130 Environmental Information Processing;09132 Signal transduction;04371 Apelin signaling pathway;K08333	K08333	PIK3R4,	phosphoinositide-3-kinase, regulatory subunit 4 [EC:2.7.11.1]
dark-hl	UPREGULATED	-1.918	0.997	09130 Environmental Information Processing;09132 Signal transduction;04371 Apelin signaling pathway;K11831	K11831	NRF1	nuclear respiratory factor 1
dark-hl	UPREGULATED	-2.765	1	09130 Environmental Information Processing;09132 Signal transduction;04390 Hippo signaling pathway;K06269	K06269	PPP1C	serine/threonine-protein phosphatase PP1 catalytic subunit [EC:3.1.3.16]
dark-hl	UPREGULATED	-3.244	1	09130 Environmental Information Processing;09132 Signal transduction;04392 Hippo signaling pathway - multiple species;K02218	K02218	CSNK1,	casein kinase 1 [EC:2.7.11.1]
dark-hl	UPREGULATED	-2.098	1	09130 Environmental Information Processing;09132 Signal transduction;04630 JAK-STAT signaling pathway;K05061	K05061	CSF3R,	granulocyte colony-stimulating factor receptor
dark-hl	UPREGULATED	-2.098	1	09130 Environmental Information Processing;09133 Signaling molecules and interaction;04060 Cytokine-cytokine receptor interaction;K05061	K05061	CSF3R,	granulocyte colony-stimulating factor receptor
dark-hl	UPREGULATED	-1.69	0.97	09130 Environmental Information Processing;09133 Signaling molecules and interaction;04080 Neuroactive ligand-receptor interaction;K04615	K04615	GABBR	gamma-aminobutyric acid type B receptor
dark-hl	UPREGULATED	-1.69	0.97	09130 Environmental Information Processing;09133 Signaling molecules and interaction;04080 Neuroactive ligand-receptor interaction;K04617	K04617	GPR156,	gamma-aminobutyric acid type B receptor-like
dark-hl	UPREGULATED	-1.948	1	09130 Environmental Information Processing;09133 Signaling molecules and interaction;04080 Neuroactive ligand-receptor interaction;K04805	K04805	CHRNA3	nicotinic acetylcholine receptor alpha-3
dark-hl	UPREGULATED	-1.346	0.989	09130 Environmental Information Processing;09133 Signaling molecules and interaction;04080 Neuroactive ligand-receptor interaction;K05193	K05193	GLRA1	glycine receptor alpha-1
dark-hl	UPREGULATED	-1.346	0.989	09130 Environmental Information Processing;09133 Signaling molecules and interaction;04080 Neuroactive ligand-receptor interaction;K05194	K05194	GLRA2	glycine receptor alpha-2
dark-hl	UPREGULATED	-1.346	0.989	09130 Environmental Information Processing;09133 Signaling molecules and interaction;04080 Neuroactive ligand-receptor interaction;K05195	K05195	GLRA3	glycine receptor alpha-3
dark-hl	UPREGULATED	-2.292	0.997	09130 Environmental Information Processing;09133 Signaling molecules and interaction;04080 Neuroactive ligand-receptor interaction;K05215	K05215	P2RX1	P2X purinoceptor 1
dark-hl	UPREGULATED	-2.292	0.997	09130 Environmental Information Processing;09133 Signaling molecules and interaction;04080 Neuroactive ligand-receptor interaction;K05218	K05218	P2RX4	P2X purinoceptor 4
dark-hl	UPREGULATED	-1.792	0.985	09130 Environmental Information Processing;09133 Signaling molecules and interaction;04080 Neuroactive ligand-receptor interaction;K05770	K05770	TSPO,	translocator protein
dark-hl	UPREGULATED	-2.344	1	09130 Environmental Information Processing;09133 Signaling molecules and interaction;04512 ECM-receptor interaction;K06252	K06252	TN	tenascin
dark-hl	UPREGULATED	-3.165	1	09140 Cellular Processes;09141 Transport and catabolism;04136 Autophagy - other;K08333	K08333	PIK3R4,	phosphoinositide-3-kinase, regulatory subunit 4 [EC:2.7.11.1]
dark-hl	UPREGULATED	-1.702	1	09140 Cellular Processes;09141 Transport and catabolism;04136 Autophagy - other;K08341	K08341	GABARAP,	GABA(A) receptor-associated protein
dark-hl	UPREGULATED	-1.706	1	09140 Cellular Processes;09141 Transport and catabolism;04137 Mitophagy - animal;K02977	K02977	RP-S27Ae,	ubiquitin-small subunit ribosomal protein S27Ae
dark-hl	UPREGULATED	-2.906	1	09140 Cellular Processes;09141 Transport and catabolism;04137 Mitophagy - animal;K03115	K03115	CSNK2B	casein kinase II subunit beta
dark-hl	UPREGULATED	-1.702	1	09140 Cellular Processes;09141 Transport and catabolism;04137 Mitophagy - animal;K08341	K08341	GABARAP,	GABA(A) receptor-associated protein
dark-hl	UPREGULATED	-1.706	1	09140 Cellular Processes;09141 Transport and catabolism;04137 Mitophagy - animal;K08770	K08770	UBC	ubiquitin C
dark-hl	UPREGULATED	-2.33	1	09140 Cellular Processes;09141 Transport and catabolism;04137 Mitophagy - animal;K20168	K20168	TBC1D15	TBC1 domain family member 15
dark-hl	UPREGULATED	-3.938	1	09140 Cellular Processes;09141 Transport and catabolism;04138 Autophagy - yeast;K00654	K00654	SPT	serine palmitoyltransferase [EC:2.3.1.50]
dark-hl	UPREGULATED	-2.184	1	09140 Cellular Processes;09141 Transport and catabolism;04138 Autophagy - yeast;K03237	K03237	EIF2S1	translation initiation factor 2 subunit 1
dark-hl	UPREGULATED	-3.165	1	09140 Cellular Processes;09141 Transport and catabolism;04138 Autophagy - yeast;K08333	K08333	PIK3R4,	phosphoinositide-3-kinase, regulatory subunit 4 [EC:2.7.11.1]
dark-hl	UPREGULATED	-1.702	1	09140 Cellular Processes;09141 Transport and catabolism;04138 Autophagy - yeast;K08341	K08341	GABARAP,	GABA(A) receptor-associated protein
dark-hl	UPREGULATED	-1.479	0.992	09140 Cellular Processes;09141 Transport and catabolism;04138 Autophagy - yeast;K08493	K08493	VTI1	vesicle transport through interaction with t-SNAREs 1
dark-hl	UPREGULATED	-3.012	1	09140 Cellular Processes;09141 Transport and catabolism;04138 Autophagy - yeast;K20179	K20179	VPS11,	vacuolar protein sorting-associated protein 11
dark-hl	UPREGULATED	-3.052	1	09140 Cellular Processes;09141 Transport and catabolism;04138 Autophagy - yeast;K20182	K20182	VPS33A	vacuolar protein sorting-associated protein 33A
dark-hl	UPREGULATED	-3.685	1	09140 Cellular Processes;09141 Transport and catabolism;04139 Mitophagy - yeast;K00889	K00889	PIP5K	1-phosphatidylinositol-4-phosphate 5-kinase [EC:2.7.1.68]
dark-hl	UPREGULATED	-2.906	1	09140 Cellular Processes;09141 Transport and catabolism;04139 Mitophagy - yeast;K03115	K03115	CSNK2B	casein kinase II subunit beta
dark-hl	UPREGULATED	-1.702	1	09140 Cellular Processes;09141 Transport and catabolism;04139 Mitophagy - yeast;K08341	K08341	GABARAP,	GABA(A) receptor-associated protein
dark-hl	UPREGULATED	-2.003	1	09140 Cellular Processes;09141 Transport and catabolism;04139 Mitophagy - yeast;K11088	K11088	SNRPD3,	small nuclear ribonucleoprotein D3
dark-hl	UPREGULATED	-2.13	0.994	09140 Cellular Processes;09141 Transport and catabolism;04140 Autophagy - animal;K01363	K01363	CTSB	cathepsin B [EC:3.4.22.1]
dark-hl	UPREGULATED	-2.13	0.994	09140 Cellular Processes;09141 Transport and catabolism;04140 Autophagy - animal;K01365	K01365	CTSL	cathepsin L [EC:3.4.22.15]
dark-hl	UPREGULATED	-1.222	0.967	09140 Cellular Processes;09141 Transport and catabolism;04140 Autophagy - animal;K01379	K01379	CTSD	cathepsin D [EC:3.4.23.5]
dark-hl	UPREGULATED	-1.706	1	09140 Cellular Processes;09141 Transport and catabolism;04140 Autophagy - animal;K02977	K02977	RP-S27Ae,	ubiquitin-small subunit ribosomal protein S27Ae
dark-hl	UPREGULATED	-2.184	1	09140 Cellular Processes;09141 Transport and catabolism;04140 Autophagy - animal;K03237	K03237	EIF2S1	translation initiation factor 2 subunit 1
dark-hl	UPREGULATED	-1.752	0.995	09140 Cellular Processes;09141 Transport and catabolism;04140 Autophagy - animal;K06276	K06276	PDPK1	3-phosphoinositide dependent protein kinase-1 [EC:2.7.11.1]
dark-hl	UPREGULATED	-2.242	1	09140 Cellular Processes;09141 Transport and catabolism;04140 Autophagy - animal;K07901	K07901	RAB8A,	Ras-related protein Rab-8A
dark-hl	UPREGULATED	-3.165	1	09140 Cellular Processes;09141 Transport and catabolism;04140 Autophagy - animal;K08333	K08333	PIK3R4,	phosphoinositide-3-kinase, regulatory subunit 4 [EC:2.7.11.1]
dark-hl	UPREGULATED	-1.702	1	09140 Cellular Processes;09141 Transport and catabolism;04140 Autophagy - animal;K08341	K08341	GABARAP,	GABA(A) receptor-associated protein
dark-hl	UPREGULATED	-1.706	1	09140 Cellular Processes;09141 Transport and catabolism;04140 Autophagy - animal;K08770	K08770	UBC	ubiquitin C
dark-hl	UPREGULATED	-3.012	1	09140 Cellular Processes;09141 Transport and catabolism;04140 Autophagy - animal;K20179	K20179	VPS11,	vacuolar protein sorting-associated protein 11
dark-hl	UPREGULATED	-3.052	1	09140 Cellular Processes;09141 Transport and catabolism;04140 Autophagy - animal;K20182	K20182	VPS33A	vacuolar protein sorting-associated protein 33A
dark-hl	UPREGULATED	-1.744	1	09140 Cellular Processes;09141 Transport and catabolism;04142 Lysosome;K01136	K01136	IDS	iduronate 2-sulfatase [EC:3.1.6.13]
dark-hl	UPREGULATED	-2.776	1	09140 Cellular Processes;09141 Transport and catabolism;04142 Lysosome;K01192	K01192	E3.2.1.25,	beta-mannosidase [EC:3.2.1.25]
dark-hl	UPREGULATED	-2.13	0.994	09140 Cellular Processes;09141 Transport and catabolism;04142 Lysosome;K01275	K01275	CTSC	cathepsin C [EC:3.4.14.1]
dark-hl	UPREGULATED	-2.13	0.994	09140 Cellular Processes;09141 Transport and catabolism;04142 Lysosome;K01363	K01363	CTSB	cathepsin B [EC:3.4.22.1]
dark-hl	UPREGULATED	-2.13	0.994	09140 Cellular Processes;09141 Transport and catabolism;04142 Lysosome;K01365	K01365	CTSL	cathepsin L [EC:3.4.22.15]
dark-hl	UPREGULATED	-2.13	0.994	09140 Cellular Processes;09141 Transport and catabolism;04142 Lysosome;K01366	K01366	CTSH	cathepsin H [EC:3.4.22.16]
dark-hl	UPREGULATED	-1.663	1	09140 Cellular Processes;09141 Transport and catabolism;04142 Lysosome;K01369	K01369	LGMN	legumain [EC:3.4.22.34]
dark-hl	UPREGULATED	-1.222	0.967	09140 Cellular Processes;09141 Transport and catabolism;04142 Lysosome;K01379	K01379	CTSD	cathepsin D [EC:3.4.23.5]
dark-hl	UPREGULATED	-1.859	0.989	09140 Cellular Processes;09141 Transport and catabolism;04142 Lysosome;K01382	K01382	CTSE	cathepsin E [EC:3.4.23.34]
dark-hl	UPREGULATED	-1.79	1	09140 Cellular Processes;09141 Transport and catabolism;04142 Lysosome;K04646	K04646	CLTC	clathrin heavy chain
dark-hl	UPREGULATED	-2.13	0.994	09140 Cellular Processes;09141 Transport and catabolism;04142 Lysosome;K08568	K08568	CTSZ	cathepsin X [EC:3.4.18.1]
dark-hl	UPREGULATED	-3.685	1	09140 Cellular Processes;09141 Transport and catabolism;04144 Endocytosis;K00889	K00889	PIP5K	1-phosphatidylinositol-4-phosphate 5-kinase [EC:2.7.1.68]
dark-hl	UPREGULATED	-2.359	1	09140 Cellular Processes;09141 Transport and catabolism;04144 Endocytosis;K03283	K03283	HSPA1_6_8	heat shock 70kDa protein 1/6/8
dark-hl	UPREGULATED	-1.79	1	09140 Cellular Processes;09141 Transport and catabolism;04144 Endocytosis;K04646	K04646	CLTC	clathrin heavy chain
dark-hl	UPREGULATED	-1.8	1	09140 Cellular Processes;09141 Transport and catabolism;04144 Endocytosis;K06643	K06643	MDM2	E3 ubiquitin-protein ligase Mdm2 [EC:2.3.2.27]
dark-hl	UPREGULATED	-2.765	1	09140 Cellular Processes;09141 Transport and catabolism;04144 Endocytosis;K07891	K07891	RAB22	Ras-related protein Rab-22
dark-hl	UPREGULATED	-2.242	1	09140 Cellular Processes;09141 Transport and catabolism;04144 Endocytosis;K07901	K07901	RAB8A,	Ras-related protein Rab-8A
dark-hl	UPREGULATED	-1.256	1	09140 Cellular Processes;09141 Transport and catabolism;04144 Endocytosis;K07937	K07937	ARF1_2	ADP-ribosylation factor 1/2
dark-hl	UPREGULATED	-1.875	1	09140 Cellular Processes;09141 Transport and catabolism;04144 Endocytosis;K10364	K10364	CAPZA	F-actin-capping protein subunit alpha
dark-hl	UPREGULATED	-2.052	1	09140 Cellular Processes;09141 Transport and catabolism;04144 Endocytosis;K12471	K12471	EPN	epsin
dark-hl	UPREGULATED	-2.341	0.998	09140 Cellular Processes;09141 Transport and catabolism;04144 Endocytosis;K12486	K12486	SMAP	stromal membrane-associated protein
dark-hl	UPREGULATED	-3.558	1	09140 Cellular Processes;09141 Transport and catabolism;04144 Endocytosis;K12492	K12492	ARFGAP1	ADP-ribosylation factor GTPase-activating protein 1
dark-hl	UPREGULATED	-3.558	1	09140 Cellular Processes;09141 Transport and catabolism;04144 Endocytosis;K12493	K12493	ARFGAP2_3	ADP-ribosylation factor GTPase-activating protein 2/3
dark-hl	UPREGULATED	-1.479	0.992	09140 Cellular Processes;09141 Transport and catabolism;04144 Endocytosis;K18443	K18443	GBF1	golgi-specific brefeldin A-resistance guanine nucleotide exchange factor 1
dark-hl	UPREGULATED	-2.13	0.994	09140 Cellular Processes;09141 Transport and catabolism;04145 Phagosome;K01365	K01365	CTSL	cathepsin L [EC:3.4.22.15]
dark-hl	UPREGULATED	-2.155	0.999	09140 Cellular Processes;09141 Transport and catabolism;04145 Phagosome;K02151	K02151	ATPeV1F,	V-type H+-transporting ATPase subunit F
dark-hl	UPREGULATED	-1.895	1	09140 Cellular Processes;09141 Transport and catabolism;04145 Phagosome;K05654	K05654	ABCB3,	ATP-binding cassette, subfamily B (MDR/TAP), member 3 [EC:7.4.2.14]
dark-hl	UPREGULATED	-2.714	1	09140 Cellular Processes;09141 Transport and catabolism;04145 Phagosome;K07342	K07342	SEC61G,	protein transport protein SEC61 subunit gamma and related proteins
dark-hl	UPREGULATED	-2.408	1	09140 Cellular Processes;09141 Transport and catabolism;04145 Phagosome;K07374	K07374	TUBA	tubulin alpha
dark-hl	UPREGULATED	-1.992	1	09140 Cellular Processes;09141 Transport and catabolism;04145 Phagosome;K08054	K08054	CANX	calnexin
dark-hl	UPREGULATED	-2.671	1	09140 Cellular Processes;09141 Transport and catabolism;04145 Phagosome;K08057	K08057	CALR	calreticulin
dark-hl	UPREGULATED	-2.368	1	09140 Cellular Processes;09141 Transport and catabolism;04145 Phagosome;K08517	K08517	SEC22	vesicle transport protein SEC22
dark-hl	UPREGULATED	-1.112	0.995	09140 Cellular Processes;09141 Transport and catabolism;04145 Phagosome;K09481	K09481	SEC61B,	protein transport protein SEC61 subunit beta
dark-hl	UPREGULATED	-3.84	1	09140 Cellular Processes;09141 Transport and catabolism;04145 Phagosome;K10956	K10956	SEC61A	protein transport protein SEC61 subunit alpha
dark-hl	UPREGULATED	-1.24	0.994	09140 Cellular Processes;09141 Transport and catabolism;04146 Peroxisome;K00306	K00306	PIPOX	sarcosine oxidase / L-pipecolate oxidase [EC:1.5.3.1 1.5.3.7]
dark-hl	UPREGULATED	-1.837	0.976	09140 Cellular Processes;09141 Transport and catabolism;04146 Peroxisome;K11187	K11187	PRDX5	peroxiredoxin 5 [EC:1.11.1.24]
dark-hl	UPREGULATED	-3.413	1	09140 Cellular Processes;09141 Transport and catabolism;04146 Peroxisome;K13339	K13339	PEX6,	peroxin-6
dark-hl	UPREGULATED	-4.149	1	09140 Cellular Processes;09141 Transport and catabolism;04146 Peroxisome;K13344	K13344	PEX13	peroxin-13
dark-hl	UPREGULATED	-1.66	0.979	09140 Cellular Processes;09141 Transport and catabolism;04146 Peroxisome;K13346	K13346	PEX10	peroxin-10
dark-hl	UPREGULATED	-1.699	0.996	09140 Cellular Processes;09142 Cell motility;02040 Flagellar assembly;K03086	K03086	rpoD	RNA polymerase primary sigma factor
dark-hl	UPREGULATED	-3.685	1	09140 Cellular Processes;09142 Cell motility;04810 Regulation of actin cytoskeleton;K00889	K00889	PIP5K	1-phosphatidylinositol-4-phosphate 5-kinase [EC:2.7.1.68]
dark-hl	UPREGULATED	-4.149	1	09140 Cellular Processes;09142 Cell motility;04810 Regulation of actin cytoskeleton;K05699	K05699	ACTN1_4	actinin alpha 1/4
dark-hl	UPREGULATED	-2.765	1	09140 Cellular Processes;09142 Cell motility;04810 Regulation of actin cytoskeleton;K06269	K06269	PPP1C	serine/threonine-protein phosphatase PP1 catalytic subunit [EC:3.1.3.16]
dark-hl	UPREGULATED	-2.408	1	09140 Cellular Processes;09142 Cell motility;04814 Motor proteins;K07374	K07374	TUBA	tubulin alpha
dark-hl	UPREGULATED	-1.531	0.983	09140 Cellular Processes;09142 Cell motility;04814 Motor proteins;K10357	K10357	MYO5	myosin V
dark-hl	UPREGULATED	-2.614	1	09140 Cellular Processes;09142 Cell motility;04814 Motor proteins;K10359	K10359	MYO7A,	myosin VIIa
dark-hl	UPREGULATED	-1.875	1	09140 Cellular Processes;09142 Cell motility;04814 Motor proteins;K10364	K10364	CAPZA	F-actin-capping protein subunit alpha
dark-hl	UPREGULATED	-1.614	1	09140 Cellular Processes;09142 Cell motility;04814 Motor proteins;K10410	K10410	DNALI	dynein axonemal light intermediate chain 1
dark-hl	UPREGULATED	-2.718	1	09140 Cellular Processes;09143 Cell growth and death;04110 Cell cycle;K02214	K02214	CDC7	cell division control protein 7 [EC:2.7.11.1]
dark-hl	UPREGULATED	-2.459	0.999	09140 Cellular Processes;09143 Cell growth and death;04110 Cell cycle;K03354	K03354	APC7,	anaphase-promoting complex subunit 7
dark-hl	UPREGULATED	-1.641	1	09140 Cellular Processes;09143 Cell growth and death;04110 Cell cycle;K04802	K04802	PCNA	proliferating cell nuclear antigen
dark-hl	UPREGULATED	-1.272	0.983	09140 Cellular Processes;09143 Cell growth and death;04110 Cell cycle;K06067	K06067	HDAC1_2	histone deacetylase 1/2 [EC:3.5.1.98]
dark-hl	UPREGULATED	-3.624	1	09140 Cellular Processes;09143 Cell growth and death;04110 Cell cycle;K06641	K06641	CHEK2	serine/threonine-protein kinase CHEK2 [EC:2.7.11.1]
dark-hl	UPREGULATED	-1.8	1	09140 Cellular Processes;09143 Cell growth and death;04110 Cell cycle;K06643	K06643	MDM2	E3 ubiquitin-protein ligase Mdm2 [EC:2.3.2.27]
dark-hl	UPREGULATED	-2.718	1	09140 Cellular Processes;09143 Cell growth and death;04111 Cell cycle - yeast;K02214	K02214	CDC7	cell division control protein 7 [EC:2.7.11.1]
dark-hl	UPREGULATED	-2.579	0.999	09140 Cellular Processes;09143 Cell growth and death;04111 Cell cycle - yeast;K02516	K02516	PRMT5,	type II protein arginine methyltransferase [EC:2.1.1.320]
dark-hl	UPREGULATED	-2.459	0.999	09140 Cellular Processes;09143 Cell growth and death;04111 Cell cycle - yeast;K03354	K03354	APC7,	anaphase-promoting complex subunit 7
dark-hl	UPREGULATED	-3.624	1	09140 Cellular Processes;09143 Cell growth and death;04111 Cell cycle - yeast;K06641	K06641	CHEK2	serine/threonine-protein kinase CHEK2 [EC:2.7.11.1]
dark-hl	UPREGULATED	-2.559	1	09140 Cellular Processes;09143 Cell growth and death;04111 Cell cycle - yeast;K06674	K06674	SMC2	structural maintenance of chromosome 2
dark-hl	UPREGULATED	-1.794	0.997	09140 Cellular Processes;09143 Cell growth and death;04111 Cell cycle - yeast;K12412	K12412	MCM1	pheromone receptor transcription factor
dark-hl	UPREGULATED	-2.288	1	09140 Cellular Processes;09143 Cell growth and death;04112 Cell cycle - Caulobacter;K01358	K01358	clpP,	ATP-dependent Clp protease, protease subunit [EC:3.4.21.92]
dark-hl	UPREGULATED	-2.718	1	09140 Cellular Processes;09143 Cell growth and death;04113 Meiosis - yeast;K02214	K02214	CDC7	cell division control protein 7 [EC:2.7.11.1]
dark-hl	UPREGULATED	-2.459	0.999	09140 Cellular Processes;09143 Cell growth and death;04113 Meiosis - yeast;K03354	K03354	APC7,	anaphase-promoting complex subunit 7
dark-hl	UPREGULATED	-2.765	1	09140 Cellular Processes;09143 Cell growth and death;04113 Meiosis - yeast;K06269	K06269	PPP1C	serine/threonine-protein phosphatase PP1 catalytic subunit [EC:3.1.3.16]
dark-hl	UPREGULATED	-1.636	0.953	09140 Cellular Processes;09143 Cell growth and death;04113 Meiosis - yeast;K08139	K08139	HXT	MFS transporter, SP family, sugar:H+ symporter
dark-hl	UPREGULATED	-3.105	1	09140 Cellular Processes;09143 Cell growth and death;04114 Oocyte meiosis;K02183	K02183	CALM	calmodulin
dark-hl	UPREGULATED	-2.459	0.999	09140 Cellular Processes;09143 Cell growth and death;04114 Oocyte meiosis;K03354	K03354	APC7,	anaphase-promoting complex subunit 7
dark-hl	UPREGULATED	-2.765	1	09140 Cellular Processes;09143 Cell growth and death;04114 Oocyte meiosis;K06269	K06269	PPP1C	serine/threonine-protein phosphatase PP1 catalytic subunit [EC:3.1.3.16]
dark-hl	UPREGULATED	-3.624	1	09140 Cellular Processes;09143 Cell growth and death;04115 p53 signaling pathway;K06641	K06641	CHEK2	serine/threonine-protein kinase CHEK2 [EC:2.7.11.1]
dark-hl	UPREGULATED	-1.8	1	09140 Cellular Processes;09143 Cell growth and death;04115 p53 signaling pathway;K06643	K06643	MDM2	E3 ubiquitin-protein ligase Mdm2 [EC:2.3.2.27]
dark-hl	UPREGULATED	-2.726	1	09140 Cellular Processes;09143 Cell growth and death;04115 p53 signaling pathway;K08738	K08738	CYC	cytochrome c
dark-hl	UPREGULATED	-2.209	1	09140 Cellular Processes;09143 Cell growth and death;04115 p53 signaling pathway;K10130	K10130	LRDD,	leucine-rich repeats and death domain-containing protein
dark-hl	UPREGULATED	-2.13	0.994	09140 Cellular Processes;09143 Cell growth and death;04210 Apoptosis;K01275	K01275	CTSC	cathepsin C [EC:3.4.14.1]
dark-hl	UPREGULATED	-2.13	0.994	09140 Cellular Processes;09143 Cell growth and death;04210 Apoptosis;K01363	K01363	CTSB	cathepsin B [EC:3.4.22.1]
dark-hl	UPREGULATED	-2.13	0.994	09140 Cellular Processes;09143 Cell growth and death;04210 Apoptosis;K01365	K01365	CTSL	cathepsin L [EC:3.4.22.15]
dark-hl	UPREGULATED	-2.13	0.994	09140 Cellular Processes;09143 Cell growth and death;04210 Apoptosis;K01366	K01366	CTSH	cathepsin H [EC:3.4.22.16]
dark-hl	UPREGULATED	-1.222	0.967	09140 Cellular Processes;09143 Cell growth and death;04210 Apoptosis;K01379	K01379	CTSD	cathepsin D [EC:3.4.23.5]
dark-hl	UPREGULATED	-2.184	1	09140 Cellular Processes;09143 Cell growth and death;04210 Apoptosis;K03237	K03237	EIF2S1	translation initiation factor 2 subunit 1
dark-hl	UPREGULATED	-1.752	0.995	09140 Cellular Processes;09143 Cell growth and death;04210 Apoptosis;K06276	K06276	PDPK1	3-phosphoinositide dependent protein kinase-1 [EC:2.7.11.1]
dark-hl	UPREGULATED	-2.408	1	09140 Cellular Processes;09143 Cell growth and death;04210 Apoptosis;K07374	K07374	TUBA	tubulin alpha
dark-hl	UPREGULATED	-2.332	1	09140 Cellular Processes;09143 Cell growth and death;04210 Apoptosis;K07611	K07611	LMNB	lamin B
dark-hl	UPREGULATED	-2.13	0.994	09140 Cellular Processes;09143 Cell growth and death;04210 Apoptosis;K08568	K08568	CTSZ	cathepsin X [EC:3.4.18.1]
dark-hl	UPREGULATED	-2.726	1	09140 Cellular Processes;09143 Cell growth and death;04210 Apoptosis;K08738	K08738	CYC	cytochrome c
dark-hl	UPREGULATED	-2.209	1	09140 Cellular Processes;09143 Cell growth and death;04210 Apoptosis;K10130	K10130	LRDD,	leucine-rich repeats and death domain-containing protein
dark-hl	UPREGULATED	-1.952	1	09140 Cellular Processes;09143 Cell growth and death;04210 Apoptosis;K10798	K10798	PARP2_3_4	poly [ADP-ribose] polymerase 2/3/4 [EC:2.4.2.30]
dark-hl	UPREGULATED	-3.388	1	09140 Cellular Processes;09143 Cell growth and death;04214 Apoptosis - fly;K01527	K01527	EGD1,	nascent polypeptide-associated complex subunit beta
dark-hl	UPREGULATED	-1.939	1	09140 Cellular Processes;09143 Cell growth and death;04214 Apoptosis - fly;K03262	K03262	EIF5	translation initiation factor 5
dark-hl	UPREGULATED	-1.792	0.985	09140 Cellular Processes;09143 Cell growth and death;04214 Apoptosis - fly;K05770	K05770	TSPO,	translocator protein
dark-hl	UPREGULATED	-2.332	1	09140 Cellular Processes;09143 Cell growth and death;04214 Apoptosis - fly;K07611	K07611	LMNB	lamin B
dark-hl	UPREGULATED	-2.726	1	09140 Cellular Processes;09143 Cell growth and death;04214 Apoptosis - fly;K08738	K08738	CYC	cytochrome c
dark-hl	UPREGULATED	-2.726	1	09140 Cellular Processes;09143 Cell growth and death;04215 Apoptosis - multiple species;K08738	K08738	CYC	cytochrome c
dark-hl	UPREGULATED	-3.921	1	09140 Cellular Processes;09143 Cell growth and death;04216 Ferroptosis;K12889	K12889	PCBP1	poly(rC)-binding protein 1
dark-hl	UPREGULATED	-3.921	1	09140 Cellular Processes;09143 Cell growth and death;04216 Ferroptosis;K13162	K13162	PCBP2	poly(rC)-binding protein 2
dark-hl	UPREGULATED	-2.254	1	09140 Cellular Processes;09143 Cell growth and death;04216 Ferroptosis;K21456	K21456	GSS	glutathione synthase [EC:6.3.2.3]
dark-hl	UPREGULATED	-2.495	1	09140 Cellular Processes;09143 Cell growth and death;04217 Necroptosis;K03767	K03767	PPIA	peptidyl-prolyl cis-trans isomerase A (cyclophilin A) [EC:5.2.1.8]
dark-hl	UPREGULATED	-3.844	1	09140 Cellular Processes;09143 Cell growth and death;04217 Necroptosis;K04079	K04079	HSP90A,	molecular chaperone HtpG
dark-hl	UPREGULATED	-2.241	0.996	09140 Cellular Processes;09143 Cell growth and death;04217 Necroptosis;K05864	K05864	PPID,	peptidyl-prolyl isomerase D [EC:5.2.1.8]
dark-hl	UPREGULATED	-3.105	1	09140 Cellular Processes;09143 Cell growth and death;04218 Cellular senescence;K02183	K02183	CALM	calmodulin
dark-hl	UPREGULATED	-2.241	0.996	09140 Cellular Processes;09143 Cell growth and death;04218 Cellular senescence;K05864	K05864	PPID,	peptidyl-prolyl isomerase D [EC:5.2.1.8]
dark-hl	UPREGULATED	-2.765	1	09140 Cellular Processes;09143 Cell growth and death;04218 Cellular senescence;K06269	K06269	PPP1C	serine/threonine-protein phosphatase PP1 catalytic subunit [EC:3.1.3.16]
dark-hl	UPREGULATED	-3.624	1	09140 Cellular Processes;09143 Cell growth and death;04218 Cellular senescence;K06641	K06641	CHEK2	serine/threonine-protein kinase CHEK2 [EC:2.7.11.1]
dark-hl	UPREGULATED	-1.8	1	09140 Cellular Processes;09143 Cell growth and death;04218 Cellular senescence;K06643	K06643	MDM2	E3 ubiquitin-protein ligase Mdm2 [EC:2.3.2.27]
dark-hl	UPREGULATED	-3.685	1	09140 Cellular Processes;09144 Cellular community - eukaryotes;04510 Focal adhesion;K00889	K00889	PIP5K	1-phosphatidylinositol-4-phosphate 5-kinase [EC:2.7.1.68]
dark-hl	UPREGULATED	-4.149	1	09140 Cellular Processes;09144 Cellular community - eukaryotes;04510 Focal adhesion;K05699	K05699	ACTN1_4	actinin alpha 1/4
dark-hl	UPREGULATED	-2.344	1	09140 Cellular Processes;09144 Cellular community - eukaryotes;04510 Focal adhesion;K06252	K06252	TN	tenascin
dark-hl	UPREGULATED	-2.765	1	09140 Cellular Processes;09144 Cellular community - eukaryotes;04510 Focal adhesion;K06269	K06269	PPP1C	serine/threonine-protein phosphatase PP1 catalytic subunit [EC:3.1.3.16]
dark-hl	UPREGULATED	-3.938	1	09140 Cellular Processes;09144 Cellular community - eukaryotes;04510 Focal adhesion;K06271	K06271	TLN	talin
dark-hl	UPREGULATED	-1.752	0.995	09140 Cellular Processes;09144 Cellular community - eukaryotes;04510 Focal adhesion;K06276	K06276	PDPK1	3-phosphoinositide dependent protein kinase-1 [EC:2.7.11.1]
dark-hl	UPREGULATED	-2.906	1	09140 Cellular Processes;09144 Cellular community - eukaryotes;04520 Adherens junction;K03115	K03115	CSNK2B	casein kinase II subunit beta
dark-hl	UPREGULATED	-2.776	1	09140 Cellular Processes;09144 Cellular community - eukaryotes;04520 Adherens junction;K05694	K05694	PTPRB,	receptor-type tyrosine-protein phosphatase beta [EC:3.1.3.48]
dark-hl	UPREGULATED	-4.149	1	09140 Cellular Processes;09144 Cellular community - eukaryotes;04520 Adherens junction;K05699	K05699	ACTN1_4	actinin alpha 1/4
dark-hl	UPREGULATED	-1.641	1	09140 Cellular Processes;09144 Cellular community - eukaryotes;04530 Tight junction;K04802	K04802	PCNA	proliferating cell nuclear antigen
dark-hl	UPREGULATED	-4.149	1	09140 Cellular Processes;09144 Cellular community - eukaryotes;04530 Tight junction;K05699	K05699	ACTN1_4	actinin alpha 1/4
dark-hl	UPREGULATED	-2.408	1	09140 Cellular Processes;09144 Cellular community - eukaryotes;04530 Tight junction;K07374	K07374	TUBA	tubulin alpha
dark-hl	UPREGULATED	-2.242	1	09140 Cellular Processes;09144 Cellular community - eukaryotes;04530 Tight junction;K07901	K07901	RAB8A,	Ras-related protein Rab-8A
dark-hl	UPREGULATED	-1.164	1	09140 Cellular Processes;09144 Cellular community - eukaryotes;04530 Tight junction;K09489	K09489	HSPA4	heat shock 70kDa protein 4
dark-hl	UPREGULATED	-2.408	1	09140 Cellular Processes;09144 Cellular community - eukaryotes;04540 Gap junction;K07374	K07374	TUBA	tubulin alpha
dark-hl	UPREGULATED	-1.437	1	09140 Cellular Processes;09145 Cellular community - prokaryotes;02024 Quorum sensing;K03106	K03106	SRP54,	signal recognition particle subunit SRP54 [EC:3.6.5.4]
dark-hl	UPREGULATED	-2.077	1	09140 Cellular Processes;09145 Cellular community - prokaryotes;02024 Quorum sensing;K03217	K03217	yidC,	YidC/Oxa1 family membrane protein insertase
dark-hl	UPREGULATED	-1.699	0.996	09140 Cellular Processes;09145 Cellular community - prokaryotes;02026 Biofilm formation - Escherichia coli;K03087	K03087	rpoS	RNA polymerase nonessential primary-like sigma factor
dark-hl	UPREGULATED	-1.699	0.996	09140 Cellular Processes;09145 Cellular community - prokaryotes;05111 Biofilm formation - Vibrio cholerae;K03087	K03087	rpoS	RNA polymerase nonessential primary-like sigma factor
dark-hl	UPREGULATED	-2.957	1	09181 Protein families: metabolism;00194 Photosynthesis proteins;K02108	K02108	ATPF0A,	F-type H+-transporting ATPase subunit a
dark-hl	UPREGULATED	-2.791	1	09181 Protein families: metabolism;00194 Photosynthesis proteins;K02109	K02109	ATPF0B,	F-type H+-transporting ATPase subunit b
dark-hl	UPREGULATED	-2.292	0.997	09181 Protein families: metabolism;00194 Photosynthesis proteins;K02110	K02110	ATPF0C,	F-type H+-transporting ATPase subunit c
dark-hl	UPREGULATED	-1.896	1	09181 Protein families: metabolism;00194 Photosynthesis proteins;K02112	K02112	ATPF1B,	F-type H+/Na+-transporting ATPase subunit beta [EC:7.1.2.2 7.2.2.1]
dark-hl	UPREGULATED	-1.896	1	09181 Protein families: metabolism;00194 Photosynthesis proteins;K02114	K02114	ATPF1E,	F-type H+-transporting ATPase subunit epsilon
dark-hl	UPREGULATED	-1.702	1	09181 Protein families: metabolism;00194 Photosynthesis proteins;K02115	K02115	ATPF1G,	F-type H+-transporting ATPase subunit gamma
dark-hl	UPREGULATED	-3.067	1	09181 Protein families: metabolism;00194 Photosynthesis proteins;K02636	K02636	petC	cytochrome b6-f complex iron-sulfur subunit [EC:7.1.1.6]
dark-hl	UPREGULATED	-4.258	1	09181 Protein families: metabolism;00194 Photosynthesis proteins;K02639	K02639	petF	ferredoxin
dark-hl	UPREGULATED	-3.12	1	09181 Protein families: metabolism;00194 Photosynthesis proteins;K02641	K02641	petH	ferredoxin--NADP+ reductase [EC:1.18.1.2]
dark-hl	UPREGULATED	-2.187	1	09181 Protein families: metabolism;00194 Photosynthesis proteins;K08903	K08903	psb28	photosystem II 13kDa protein
dark-hl	UPREGULATED	-3.749	1	09181 Protein families: metabolism;00194 Photosynthesis proteins;K08907	K08907	LHCA1	light-harvesting complex I chlorophyll a/b binding protein 1
dark-hl	UPREGULATED	-1.974	1	09181 Protein families: metabolism;00194 Photosynthesis proteins;K08908	K08908	LHCA2	light-harvesting complex I chlorophyll a/b binding protein 2
dark-hl	UPREGULATED	-2.893	1	09181 Protein families: metabolism;00194 Photosynthesis proteins;K08914	K08914	LHCB3	light-harvesting complex II chlorophyll a/b binding protein 3
dark-hl	UPREGULATED	-3.749	1	09181 Protein families: metabolism;00194 Photosynthesis proteins;K08916	K08916	LHCB5	light-harvesting complex II chlorophyll a/b binding protein 5
dark-hl	UPREGULATED	-3.749	1	09181 Protein families: metabolism;00194 Photosynthesis proteins;K08917	K08917	LHCB6	light-harvesting complex II chlorophyll a/b binding protein 6
dark-hl	UPREGULATED	-3.83	1	09181 Protein families: metabolism;00194 Photosynthesis proteins;K14172	K14172	LHCB7	light-harvesting complex II chlorophyll a/b binding protein 7
dark-hl	UPREGULATED	-1.983	0.999	09181 Protein families: metabolism;00199 Cytochrome P450;K07427	K07427	CYP4V	docosahexaenoic acid omega-hydroxylase [EC:1.14.14.79]
dark-hl	UPREGULATED	-1.862	1	09181 Protein families: metabolism;00199 Cytochrome P450;K15402	K15402	CYP86B1	fatty acid omega-hydroxylase [EC:1.14.-.-]
dark-hl	UPREGULATED	-2.718	1	09181 Protein families: metabolism;01001 Protein kinases;K02214	K02214	CDC7	cell division control protein 7 [EC:2.7.11.1]
dark-hl	UPREGULATED	-3.244	1	09181 Protein families: metabolism;01001 Protein kinases;K02218	K02218	CSNK1,	casein kinase 1 [EC:2.7.11.1]
dark-hl	UPREGULATED	-3.549	1	09181 Protein families: metabolism;01001 Protein kinases;K02449	K02449	CDK10	cyclin-dependent kinase 10 [EC:2.7.11.22]
dark-hl	UPREGULATED	-1.752	0.995	09181 Protein families: metabolism;01001 Protein kinases;K06276	K06276	PDPK1	3-phosphoinositide dependent protein kinase-1 [EC:2.7.11.1]
dark-hl	UPREGULATED	-3.624	1	09181 Protein families: metabolism;01001 Protein kinases;K06641	K06641	CHEK2	serine/threonine-protein kinase CHEK2 [EC:2.7.11.1]
dark-hl	UPREGULATED	-1.614	1	09181 Protein families: metabolism;01001 Protein kinases;K07179	K07179	RIOK2	RIO kinase 2 [EC:2.7.11.1]
dark-hl	UPREGULATED	-3.165	1	09181 Protein families: metabolism;01001 Protein kinases;K08333	K08333	PIK3R4,	phosphoinositide-3-kinase, regulatory subunit 4 [EC:2.7.11.1]
dark-hl	UPREGULATED	-1.745	0.989	09181 Protein families: metabolism;01001 Protein kinases;K08788	K08788	DMPK	dystrophia myotonica-protein kinase [EC:2.7.11.1]
dark-hl	UPREGULATED	-1.287	0.978	09181 Protein families: metabolism;01001 Protein kinases;K08818	K08818	CDC2L	cell division cycle 2-like [EC:2.7.11.22]
dark-hl	UPREGULATED	-2.788	1	09181 Protein families: metabolism;01001 Protein kinases;K08819	K08819	CDK12_13	cyclin-dependent kinase 12/13 [EC:2.7.11.22 2.7.11.23]
dark-hl	UPREGULATED	-3.014	1	09181 Protein families: metabolism;01001 Protein kinases;K08825	K08825	DYRK1	dual specificity tyrosine-phosphorylation-regulated kinase 1 [EC:2.7.12.1]
dark-hl	UPREGULATED	-1.358	0.976	09181 Protein families: metabolism;01001 Protein kinases;K08827	K08827	PRPF4B	serine/threonine-protein kinase PRP4 [EC:2.7.11.1]
dark-hl	UPREGULATED	-2.33	1	09181 Protein families: metabolism;01001 Protein kinases;K08854	K08854	BMP2K,	BMP2 inducible kinase [EC:2.7.11.1]
dark-hl	UPREGULATED	-1.307	1	09181 Protein families: metabolism;01001 Protein kinases;K08869	K08869	ADCK,	aarF domain-containing kinase
dark-hl	UPREGULATED	-2.411	1	09181 Protein families: metabolism;01001 Protein kinases;K08873	K08873	SMG1	serine/threonine-protein kinase SMG1 [EC:2.7.11.1]
dark-hl	UPREGULATED	-4.171	1	09181 Protein families: metabolism;01001 Protein kinases;K13412	K13412	CPK	calcium-dependent protein kinase [EC:2.7.11.1]
dark-hl	UPREGULATED	-2.332	1	09181 Protein families: metabolism;01001 Protein kinases;K14498	K14498	SNRK2	serine/threonine-protein kinase SRK2 [EC:2.7.11.1]
dark-hl	UPREGULATED	-1.745	0.989	09181 Protein families: metabolism;01001 Protein kinases;K16307	K16307	CDC42BP	serine/threonine-protein kinase MRCK [EC:2.7.11.1]
dark-hl	UPREGULATED	-1.66	0.979	09181 Protein families: metabolism;01001 Protein kinases;K20718	K20718	ER	LRR receptor-like serine/threonine-protein kinase ERECTA [EC:2.7.11.1]
dark-hl	UPREGULATED	-3.624	1	09181 Protein families: metabolism;01001 Protein kinases;K21358	K21358	ULK3	serine/threonine-protein kinase ULK3 [EC:2.7.11.1]
dark-hl	UPREGULATED	-2.24	1	09181 Protein families: metabolism;01002 Peptidases and inhibitors;K00284	K00284	GLU,	glutamate synthase (ferredoxin) [EC:1.4.7.1]
dark-hl	UPREGULATED	-2.499	1	09181 Protein families: metabolism;01002 Peptidases and inhibitors;K00820	K00820	glmS,	glutamine---fructose-6-phosphate transaminase (isomerizing) [EC:2.6.1.16]
dark-hl	UPREGULATED	-3.584	1	09181 Protein families: metabolism;01002 Peptidases and inhibitors;K01054	K01054	MGLL	acylglycerol lipase [EC:3.1.1.23]
dark-hl	UPREGULATED	-4.796	1	09181 Protein families: metabolism;01002 Peptidases and inhibitors;K01255	K01255	CARP,	leucyl aminopeptidase [EC:3.4.11.1]
dark-hl	UPREGULATED	-2.779	1	09181 Protein families: metabolism;01002 Peptidases and inhibitors;K01256	K01256	pepN	aminopeptidase N [EC:3.4.11.2]
dark-hl	UPREGULATED	-2.714	1	09181 Protein families: metabolism;01002 Peptidases and inhibitors;K01262	K01262	pepP	Xaa-Pro aminopeptidase [EC:3.4.11.9]
dark-hl	UPREGULATED	-1.636	0.986	09181 Protein families: metabolism;01002 Peptidases and inhibitors;K01265	K01265	map	methionyl aminopeptidase [EC:3.4.11.18]
dark-hl	UPREGULATED	-2.13	0.994	09181 Protein families: metabolism;01002 Peptidases and inhibitors;K01275	K01275	CTSC	cathepsin C [EC:3.4.14.1]
dark-hl	UPREGULATED	-5.258	1	09181 Protein families: metabolism;01002 Peptidases and inhibitors;K01288	K01288	KEX1	carboxypeptidase D [EC:3.4.16.6]
dark-hl	UPREGULATED	-1.356	0.955	09181 Protein families: metabolism;01002 Peptidases and inhibitors;K01354	K01354	ptrB	oligopeptidase B [EC:3.4.21.83]
dark-hl	UPREGULATED	-2.288	1	09181 Protein families: metabolism;01002 Peptidases and inhibitors;K01358	K01358	clpP,	ATP-dependent Clp protease, protease subunit [EC:3.4.21.92]
dark-hl	UPREGULATED	-2.13	0.994	09181 Protein families: metabolism;01002 Peptidases and inhibitors;K01363	K01363	CTSB	cathepsin B [EC:3.4.22.1]
dark-hl	UPREGULATED	-2.13	0.994	09181 Protein families: metabolism;01002 Peptidases and inhibitors;K01365	K01365	CTSL	cathepsin L [EC:3.4.22.15]
dark-hl	UPREGULATED	-2.13	0.994	09181 Protein families: metabolism;01002 Peptidases and inhibitors;K01366	K01366	CTSH	cathepsin H [EC:3.4.22.16]
dark-hl	UPREGULATED	-1.663	1	09181 Protein families: metabolism;01002 Peptidases and inhibitors;K01369	K01369	LGMN	legumain [EC:3.4.22.34]
dark-hl	UPREGULATED	-1.222	0.967	09181 Protein families: metabolism;01002 Peptidases and inhibitors;K01378	K01378	CYM	chymosin [EC:3.4.23.4]
dark-hl	UPREGULATED	-1.222	0.967	09181 Protein families: metabolism;01002 Peptidases and inhibitors;K01379	K01379	CTSD	cathepsin D [EC:3.4.23.5]
dark-hl	UPREGULATED	-1.859	0.989	09181 Protein families: metabolism;01002 Peptidases and inhibitors;K01382	K01382	CTSE	cathepsin E [EC:3.4.23.34]
dark-hl	UPREGULATED	-1.078	0.999	09181 Protein families: metabolism;01002 Peptidases and inhibitors;K01392	K01392	THOP1	thimet oligopeptidase [EC:3.4.24.15]
dark-hl	UPREGULATED	-1.078	0.999	09181 Protein families: metabolism;01002 Peptidases and inhibitors;K01405	K01405	PRD1	saccharolysin [EC:3.4.24.37]
dark-hl	UPREGULATED	-2.742	1	09181 Protein families: metabolism;01002 Peptidases and inhibitors;K01408	K01408	IDE,	insulysin [EC:3.4.24.56]
dark-hl	UPREGULATED	-1.69	0.97	09181 Protein families: metabolism;01002 Peptidases and inhibitors;K01410	K01410	MIPEP	mitochondrial intermediate peptidase [EC:3.4.24.59]
dark-hl	UPREGULATED	-2.742	1	09181 Protein families: metabolism;01002 Peptidases and inhibitors;K01411	K01411	NRD1	nardilysin [EC:3.4.24.61]
dark-hl	UPREGULATED	-1.542	0.996	09181 Protein families: metabolism;01002 Peptidases and inhibitors;K01412	K01412	PMPCA,	mitochondrial-processing peptidase subunit alpha [EC:3.4.24.64]
dark-hl	UPREGULATED	-1.078	0.999	09181 Protein families: metabolism;01002 Peptidases and inhibitors;K01414	K01414	prlC	oligopeptidase A [EC:3.4.24.70]
dark-hl	UPREGULATED	-2.353	0.999	09181 Protein families: metabolism;01002 Peptidases and inhibitors;K01419	K01419	hslV,	ATP-dependent HslUV protease, peptidase subunit HslV [EC:3.4.25.2]
dark-hl	UPREGULATED	-1.935	0.987	09181 Protein families: metabolism;01002 Peptidases and inhibitors;K01948	K01948	CPS1	carbamoyl-phosphate synthase (ammonia) [EC:6.3.4.16]
dark-hl	UPREGULATED	-2.754	1	09181 Protein families: metabolism;01002 Peptidases and inhibitors;K01951	K01951	guaA,	GMP synthase (glutamine-hydrolysing) [EC:6.3.5.2]
dark-hl	UPREGULATED	-2.302	1	09181 Protein families: metabolism;01002 Peptidases and inhibitors;K01953	K01953	asnB,	asparagine synthase (glutamine-hydrolysing) [EC:6.3.5.4]
dark-hl	UPREGULATED	-2.482	1	09181 Protein families: metabolism;01002 Peptidases and inhibitors;K02725	K02725	PSMA1	20S proteasome subunit alpha 6 [EC:3.4.25.1]
dark-hl	UPREGULATED	-3.293	1	09181 Protein families: metabolism;01002 Peptidases and inhibitors;K02726	K02726	PSMA2	20S proteasome subunit alpha 2 [EC:3.4.25.1]
dark-hl	UPREGULATED	-1.655	1	09181 Protein families: metabolism;01002 Peptidases and inhibitors;K02727	K02727	PSMA3	20S proteasome subunit alpha 7 [EC:3.4.25.1]
dark-hl	UPREGULATED	-2.797	1	09181 Protein families: metabolism;01002 Peptidases and inhibitors;K02728	K02728	PSMA4	20S proteasome subunit alpha 3 [EC:3.4.25.1]
dark-hl	UPREGULATED	-2.451	1	09181 Protein families: metabolism;01002 Peptidases and inhibitors;K02729	K02729	PSMA5	20S proteasome subunit alpha 5 [EC:3.4.25.1]
dark-hl	UPREGULATED	-2.138	1	09181 Protein families: metabolism;01002 Peptidases and inhibitors;K02730	K02730	PSMA6	20S proteasome subunit alpha 1 [EC:3.4.25.1]
dark-hl	UPREGULATED	-1.219	0.993	09181 Protein families: metabolism;01002 Peptidases and inhibitors;K02732	K02732	PSMB1	20S proteasome subunit beta 6 [EC:3.4.25.1]
dark-hl	UPREGULATED	-1.862	1	09181 Protein families: metabolism;01002 Peptidases and inhibitors;K02733	K02733	PSMB10,	20S proteasome subunit beta 10 [EC:3.4.25.1]
dark-hl	UPREGULATED	-1.696	1	09181 Protein families: metabolism;01002 Peptidases and inhibitors;K02734	K02734	PSMB2	20S proteasome subunit beta 4 [EC:3.4.25.1]
dark-hl	UPREGULATED	-2.559	1	09181 Protein families: metabolism;01002 Peptidases and inhibitors;K02735	K02735	PSMB3	20S proteasome subunit beta 3 [EC:3.4.25.1]
dark-hl	UPREGULATED	-2.251	1	09181 Protein families: metabolism;01002 Peptidases and inhibitors;K02736	K02736	PSMB4	20S proteasome subunit beta 7 [EC:3.4.25.1]
dark-hl	UPREGULATED	-1.895	1	09181 Protein families: metabolism;01002 Peptidases and inhibitors;K02737	K02737	PSMB5	20S proteasome subunit beta 5 [EC:3.4.25.1]
dark-hl	UPREGULATED	-2.499	1	09181 Protein families: metabolism;01002 Peptidases and inhibitors;K02738	K02738	PSMB6	20S proteasome subunit beta 1 [EC:3.4.25.1]
dark-hl	UPREGULATED	-1.862	1	09181 Protein families: metabolism;01002 Peptidases and inhibitors;K02739	K02739	PSMB7	20S proteasome subunit beta 2 [EC:3.4.25.1]
dark-hl	UPREGULATED	-1.895	1	09181 Protein families: metabolism;01002 Peptidases and inhibitors;K02740	K02740	PSMB8,	20S proteasome subunit beta 8 [EC:3.4.25.1]
dark-hl	UPREGULATED	-1.975	1	09181 Protein families: metabolism;01002 Peptidases and inhibitors;K03030	K03030	PSMD14,	26S proteasome regulatory subunit N11
dark-hl	UPREGULATED	-1.097	1	09181 Protein families: metabolism;01002 Peptidases and inhibitors;K03798	K03798	ftsH,	cell division protease FtsH [EC:3.4.24.-]
dark-hl	UPREGULATED	-1.222	0.967	09181 Protein families: metabolism;01002 Peptidases and inhibitors;K06002	K06002	PGA	pepsin A [EC:3.4.23.1]
dark-hl	UPREGULATED	-2.004	0.999	09181 Protein families: metabolism;01002 Peptidases and inhibitors;K06972	K06972	PITRM1,	presequence protease [EC:3.4.24.-]
dark-hl	UPREGULATED	-2.13	0.994	09181 Protein families: metabolism;01002 Peptidases and inhibitors;K08568	K08568	CTSZ	cathepsin X [EC:3.4.18.1]
dark-hl	UPREGULATED	-1.745	0.989	09181 Protein families: metabolism;01002 Peptidases and inhibitors;K08583	K08583	CAPNS1,	calpain, small subunit 1
dark-hl	UPREGULATED	-3.293	1	09181 Protein families: metabolism;01002 Peptidases and inhibitors;K08597	K08597	SENP8,	sentrin-specific protease 8 [EC:3.4.22.68]
dark-hl	UPREGULATED	-2.1	0.992	09181 Protein families: metabolism;01002 Peptidases and inhibitors;K08675	K08675	PRSS15,	ATP-dependent Lon protease [EC:3.4.21.53]
dark-hl	UPREGULATED	-3.229	1	09181 Protein families: metabolism;01002 Peptidases and inhibitors;K09595	K09595	HM13	minor histocompatibility antigen H13 [EC:3.4.23.-]
dark-hl	UPREGULATED	-3.893	1	09181 Protein families: metabolism;01002 Peptidases and inhibitors;K09611	K09611	NPEPL1	probable aminopeptidase NPEPL1 [EC:3.4.11.-]
dark-hl	UPREGULATED	-1.952	1	09181 Protein families: metabolism;01002 Peptidases and inhibitors;K11366	K11366	USP22_27_51,	ubiquitin carboxyl-terminal hydrolase 22/27/51 [EC:3.4.19.12]
dark-hl	UPREGULATED	-1.935	0.987	09181 Protein families: metabolism;01002 Peptidases and inhibitors;K11540	K11540	CAD	carbamoyl-phosphate synthase / aspartate carbamoyltransferase / dihydroorotase [EC:6.3.5.5 2.1.3.2 3.5.2.3]
dark-hl	UPREGULATED	-2.838	1	09181 Protein families: metabolism;01002 Peptidases and inhibitors;K11836	K11836	USP5_13,	ubiquitin carboxyl-terminal hydrolase 5/13 [EC:3.4.19.12]
dark-hl	UPREGULATED	-2.332	1	09181 Protein families: metabolism;01002 Peptidases and inhibitors;K13022	K13022	CPZ	carboxypeptidase Z [EC:3.4.17.-]
dark-hl	UPREGULATED	-2.179	0.997	09181 Protein families: metabolism;01002 Peptidases and inhibitors;K13280	K13280	SEC11,	signal peptidase I [EC:3.4.21.89]
dark-hl	UPREGULATED	-2.779	1	09181 Protein families: metabolism;01002 Peptidases and inhibitors;K13725	K13725	PFAM1	M1-family aminopeptidase [EC:3.4.11.-]
dark-hl	UPREGULATED	-1.078	0.999	09181 Protein families: metabolism;01002 Peptidases and inhibitors;K13726	K13726	MEPB	metallopeptidase MepB [EC:3.4.24.-]
dark-hl	UPREGULATED	-3.052	1	09181 Protein families: metabolism;01002 Peptidases and inhibitors;K13963	K13963	SERPINB	serpin B
dark-hl	UPREGULATED	-2.13	0.994	09181 Protein families: metabolism;01002 Peptidases and inhibitors;K16290	K16290	XCP	xylem cysteine proteinase [EC:3.4.22.-]
dark-hl	UPREGULATED	-2.107	1	09181 Protein families: metabolism;01002 Peptidases and inhibitors;K17732	K17732	PMPCB,	mitochondrial-processing peptidase subunit beta [EC:3.4.24.64]
dark-hl	UPREGULATED	-1.84	0.987	09181 Protein families: metabolism;01002 Peptidases and inhibitors;K19200	K19200	IAL	isopenicillin-N N-acyltransferase like protein
dark-hl	UPREGULATED	-1.545	0.993	09181 Protein families: metabolism;01003 Glycosyltransferases;K00721	K00721	DPM1	dolichol-phosphate mannosyltransferase [EC:2.4.1.83]
dark-hl	UPREGULATED	-3.012	1	09181 Protein families: metabolism;01003 Glycosyltransferases;K00731	K00731	C1GALT1	glycoprotein-N-acetylgalactosamine 3-beta-galactosyltransferase [EC:2.4.1.122]
dark-hl	UPREGULATED	-2.69	1	09181 Protein families: metabolism;01003 Glycosyltransferases;K00734	K00734	B3GALT6	galactosylxylosylprotein 3-beta-galactosyltransferase [EC:2.4.1.134]
dark-hl	UPREGULATED	-2.242	1	09181 Protein families: metabolism;01003 Glycosyltransferases;K02513	K02513	HS2ST1	heparan sulfate 2-O-sulfotransferase HS2ST1 [EC:2.8.2.-]
dark-hl	UPREGULATED	-2.242	1	09181 Protein families: metabolism;01003 Glycosyltransferases;K03193	K03193	UST	dermatan/chondrotin sulfate uronyl 2-O-sulfotransferase UST [EC:2.8.2.-]
dark-hl	UPREGULATED	-2.579	0.999	09181 Protein families: metabolism;01003 Glycosyltransferases;K03368	K03368	ST3GAL2	beta-galactoside alpha-2,3-sialyltransferase (sialyltransferase 4B) [EC:2.4.3.2 2.4.3.4]
dark-hl	UPREGULATED	-2.846	1	09181 Protein families: metabolism;01003 Glycosyltransferases;K03715	K03715	MGD	1,2-diacylglycerol 3-beta-galactosyltransferase [EC:2.4.1.46]
dark-hl	UPREGULATED	-2.459	0.999	09181 Protein families: metabolism;01003 Glycosyltransferases;K03847	K03847	ALG12	alpha-1,6-mannosyltransferase [EC:2.4.1.260]
dark-hl	UPREGULATED	-3.658	1	09181 Protein families: metabolism;01003 Glycosyltransferases;K05841	K05841	E2.4.1.173	sterol 3beta-glucosyltransferase [EC:2.4.1.173]
dark-hl	UPREGULATED	-3.495	1	09181 Protein families: metabolism;01003 Glycosyltransferases;K07151	K07151	STT3	dolichyl-diphosphooligosaccharide---protein glycosyltransferase [EC:2.4.99.18]
dark-hl	UPREGULATED	-1.505	0.967	09181 Protein families: metabolism;01003 Glycosyltransferases;K07779	K07779	CHST13	chondroitin 4-sulfotransferase 13 [EC:2.8.2.5]
dark-hl	UPREGULATED	-1.505	0.967	09181 Protein families: metabolism;01003 Glycosyltransferases;K08105	K08105	D4ST1	dermatan 4-sulfotransferase 1 [EC:2.8.2.35]
dark-hl	UPREGULATED	-1.225	0.963	09181 Protein families: metabolism;01003 Glycosyltransferases;K11703	K11703	GLT25D	collagen beta-1,O-galactosyltransferase [EC:2.4.1.50]
dark-hl	UPREGULATED	-1.408	0.961	09181 Protein families: metabolism;01003 Glycosyltransferases;K11714	K11714	RGXT	rhamnogalacturonan II specific xylosyltransferase [EC:2.4.2.-]
dark-hl	UPREGULATED	-1.726	0.998	09181 Protein families: metabolism;01003 Glycosyltransferases;K11718	K11718	HUGT	UDP-glucose:glycoprotein glucosyltransferase [EC:2.4.1.-]
dark-hl	UPREGULATED	-2.963	1	09181 Protein families: metabolism;01003 Glycosyltransferases;K13379	K13379	RGP,	reversibly glycosylated polypeptide / UDP-arabinopyranose mutase [EC:2.4.1.- 5.4.99.30]
dark-hl	UPREGULATED	-1.827	0.987	09181 Protein families: metabolism;01003 Glycosyltransferases;K13648	K13648	GAUT	alpha-1,4-galacturonosyltransferase [EC:2.4.1.43]
dark-hl	UPREGULATED	-1.837	0.976	09181 Protein families: metabolism;01003 Glycosyltransferases;K13667	K13667	POGLUT1,	EGF-domain serine glucosyl/xylosyltransferase [EC:2.4.1.376 2.4.2.63]
dark-hl	UPREGULATED	-2.238	1	09181 Protein families: metabolism;01003 Glycosyltransferases;K20782	K20782	HPAT	hydroxyproline O-arabinosyltransferase [EC:2.4.2.58]
dark-hl	UPREGULATED	-2.69	1	09181 Protein families: metabolism;01003 Glycosyltransferases;K20843	K20843	GALT2S	hydroxyproline O-galactosyltransferase 2/3/4/5/6 [EC:2.4.1.-]
dark-hl	UPREGULATED	-1.641	0.996	09181 Protein families: metabolism;01003 Glycosyltransferases;K20870	K20870	IRX10	putative beta-1,4-xylosyltransferase IRX10 [EC:2.4.2.-]
dark-hl	UPREGULATED	-1.66	0.979	09181 Protein families: metabolism;01004 Lipid biosynthesis proteins;K00059	K00059	fabG,	3-oxoacyl-[acyl-carrier protein] reductase [EC:1.1.1.100]
dark-hl	UPREGULATED	-1.342	1	09181 Protein families: metabolism;01004 Lipid biosynthesis proteins;K00507	K00507	SCD,	stearoyl-CoA desaturase (Delta-9 desaturase) [EC:1.14.19.1]
dark-hl	UPREGULATED	-2.209	1	09181 Protein families: metabolism;01004 Lipid biosynthesis proteins;K09458	K09458	fabF,	3-oxoacyl-[acyl-carrier-protein] synthase II [EC:2.3.1.179]
dark-hl	UPREGULATED	-1.681	0.97	09181 Protein families: metabolism;01004 Lipid biosynthesis proteins;K10203	K10203	ELOVL6	elongation of very long chain fatty acids protein 6 [EC:2.3.1.199]
dark-hl	UPREGULATED	-4.006	1	09181 Protein families: metabolism;01004 Lipid biosynthesis proteins;K10226	K10226	FADS2	acyl-CoA 6-desaturase (Delta-6 desaturase) [EC:1.14.19.3]
dark-hl	UPREGULATED	-1.095	0.995	09181 Protein families: metabolism;01004 Lipid biosynthesis proteins;K10256	K10256	FAD2	omega-6 fatty acid desaturase / acyl-lipid omega-6 desaturase (Delta-12 desaturase) [EC:1.14.19.6 1.14.19.22]
dark-hl	UPREGULATED	-1.688	0.999	09181 Protein families: metabolism;01004 Lipid biosynthesis proteins;K10781	K10781	FATB	fatty acyl-ACP thioesterase B [EC:3.1.2.14 3.1.2.21]
dark-hl	UPREGULATED	-1.545	0.993	09181 Protein families: metabolism;01005 Lipopolysaccharide biosynthesis proteins;K20534	K20534	gtrB	polyisoprenyl-phosphate glycosyltransferase [EC:2.4.-.-]
dark-hl	UPREGULATED	-1.457	1	09181 Protein families: metabolism;01006 Prenyltransferases;K00791	K00791	miaA,	tRNA dimethylallyltransferase [EC:2.5.1.75]
dark-hl	UPREGULATED	-2.839	1	09181 Protein families: metabolism;01006 Prenyltransferases;K00801	K00801	FDFT1	farnesyl-diphosphate farnesyltransferase [EC:2.5.1.21]
dark-hl	UPREGULATED	-2.254	1	09181 Protein families: metabolism;01006 Prenyltransferases;K05355	K05355	hexPS,	hexaprenyl-diphosphate synthase [EC:2.5.1.82 2.5.1.83]
dark-hl	UPREGULATED	-2.459	0.999	09181 Protein families: metabolism;01006 Prenyltransferases;K09833	K09833	HPT,	homogentisate phytyltransferase / homogentisate geranylgeranyltransferase [EC:2.5.1.115 2.5.1.116]
dark-hl	UPREGULATED	-2.254	1	09181 Protein families: metabolism;01006 Prenyltransferases;K12505	K12505	PDSS2	decaprenyl-diphosphate synthase subunit 2 [EC:2.5.1.91]
dark-hl	UPREGULATED	-2.277	1	09181 Protein families: metabolism;01006 Prenyltransferases;K14066	K14066	GPS	geranyl diphosphate synthase [EC:2.5.1.1]
dark-hl	UPREGULATED	-3.938	1	09181 Protein families: metabolism;01007 Amino acid related enzymes;K00654	K00654	SPT	serine palmitoyltransferase [EC:2.3.1.50]
dark-hl	UPREGULATED	-1.379	0.965	09181 Protein families: metabolism;01007 Amino acid related enzymes;K00814	K00814	GPT,	alanine transaminase [EC:2.6.1.2]
dark-hl	UPREGULATED	-2.474	0.999	09181 Protein families: metabolism;01007 Amino acid related enzymes;K00816	K00816	CCBL	kynurenine---oxoglutarate transaminase / cysteine-S-conjugate beta-lyase / glutamine---phenylpyruvate transaminase [EC:2.6.1.7 4.4.1.13 2.6.1.64]
dark-hl	UPREGULATED	-2.487	1	09181 Protein families: metabolism;01007 Amino acid related enzymes;K00817	K00817	hisC	histidinol-phosphate aminotransferase [EC:2.6.1.9]
dark-hl	UPREGULATED	-3.224	1	09181 Protein families: metabolism;01007 Amino acid related enzymes;K00826	K00826	E2.6.1.42,	branched-chain amino acid aminotransferase [EC:2.6.1.42]
dark-hl	UPREGULATED	-2.736	1	09181 Protein families: metabolism;01007 Amino acid related enzymes;K00831	K00831	serC,	phosphoserine aminotransferase [EC:2.6.1.52]
dark-hl	UPREGULATED	-1.44	1	09181 Protein families: metabolism;01007 Amino acid related enzymes;K01866	K01866	YARS,	tyrosyl-tRNA synthetase [EC:6.1.1.1]
dark-hl	UPREGULATED	-1.66	0.979	09181 Protein families: metabolism;01007 Amino acid related enzymes;K01867	K01867	WARS,	tryptophanyl-tRNA synthetase [EC:6.1.1.2]
dark-hl	UPREGULATED	-1.293	0.983	09181 Protein families: metabolism;01007 Amino acid related enzymes;K01868	K01868	TARS,	threonyl-tRNA synthetase [EC:6.1.1.3]
dark-hl	UPREGULATED	-2.333	1	09181 Protein families: metabolism;01007 Amino acid related enzymes;K01869	K01869	LARS,	leucyl-tRNA synthetase [EC:6.1.1.4]
dark-hl	UPREGULATED	-1.918	0.997	09181 Protein families: metabolism;01007 Amino acid related enzymes;K01870	K01870	IARS,	isoleucyl-tRNA synthetase [EC:6.1.1.5]
dark-hl	UPREGULATED	-2.063	1	09181 Protein families: metabolism;01007 Amino acid related enzymes;K01873	K01873	VARS,	valyl-tRNA synthetase [EC:6.1.1.9]
dark-hl	UPREGULATED	-2.596	1	09181 Protein families: metabolism;01007 Amino acid related enzymes;K01874	K01874	MARS,	methionyl-tRNA synthetase [EC:6.1.1.10]
dark-hl	UPREGULATED	-1.92	1	09181 Protein families: metabolism;01007 Amino acid related enzymes;K01875	K01875	SARS,	seryl-tRNA synthetase [EC:6.1.1.11]
dark-hl	UPREGULATED	-3.486	1	09181 Protein families: metabolism;01007 Amino acid related enzymes;K01876	K01876	DARS2,	aspartyl-tRNA synthetase [EC:6.1.1.12]
dark-hl	UPREGULATED	-2.659	1	09181 Protein families: metabolism;01007 Amino acid related enzymes;K01885	K01885	EARS,	glutamyl-tRNA synthetase [EC:6.1.1.17]
dark-hl	UPREGULATED	-2.236	1	09181 Protein families: metabolism;01007 Amino acid related enzymes;K01886	K01886	QARS,	glutaminyl-tRNA synthetase [EC:6.1.1.18]
dark-hl	UPREGULATED	-2.89	1	09181 Protein families: metabolism;01007 Amino acid related enzymes;K01887	K01887	RARS,	arginyl-tRNA synthetase [EC:6.1.1.19]
dark-hl	UPREGULATED	-3.985	1	09181 Protein families: metabolism;01007 Amino acid related enzymes;K01889	K01889	FARSA,	phenylalanyl-tRNA synthetase alpha chain [EC:6.1.1.20]
dark-hl	UPREGULATED	-4.45	1	09181 Protein families: metabolism;01007 Amino acid related enzymes;K01890	K01890	FARSB,	phenylalanyl-tRNA synthetase beta chain [EC:6.1.1.20]
dark-hl	UPREGULATED	-3.333	1	09181 Protein families: metabolism;01007 Amino acid related enzymes;K01892	K01892	HARS,	histidyl-tRNA synthetase [EC:6.1.1.21]
dark-hl	UPREGULATED	-1.796	1	09181 Protein families: metabolism;01007 Amino acid related enzymes;K01893	K01893	NARS,	asparaginyl-tRNA synthetase [EC:6.1.1.22]
dark-hl	UPREGULATED	-2.459	0.999	09181 Protein families: metabolism;01007 Amino acid related enzymes;K01894	K01894	gluQ	glutamyl-Q tRNA(Asp) synthetase [EC:6.1.1.-]
dark-hl	UPREGULATED	-1.219	0.993	09181 Protein families: metabolism;01007 Amino acid related enzymes;K04567	K04567	KARS,	lysyl-tRNA synthetase, class II [EC:6.1.1.6]
dark-hl	UPREGULATED	-1.84	0.987	09181 Protein families: metabolism;01007 Amino acid related enzymes;K14163	K14163	EPRS	bifunctional glutamyl/prolyl-tRNA synthetase [EC:6.1.1.17 6.1.1.15]
dark-hl	UPREGULATED	-2.474	0.999	09181 Protein families: metabolism;01007 Amino acid related enzymes;K14264	K14264	BNA3	kynurenine aminotransferase [EC:2.6.1.7]
dark-hl	UPREGULATED	-3.486	1	09181 Protein families: metabolism;01007 Amino acid related enzymes;K22503	K22503	DARS1	aspartyl-tRNA synthetase [EC:6.1.1.12]
dark-hl	UPREGULATED	-4.347	1	09181 Protein families: metabolism;01009 Protein phosphatases and associated proteins;K01251	K01251	AHCY,	adenosylhomocysteinase [EC:3.13.2.1]
dark-hl	UPREGULATED	-3.105	1	09181 Protein families: metabolism;01009 Protein phosphatases and associated proteins;K02183	K02183	CALM	calmodulin
dark-hl	UPREGULATED	-3.629	1	09181 Protein families: metabolism;01009 Protein phosphatases and associated proteins;K02932	K02932	RP-L5e,	large subunit ribosomal protein L5e
dark-hl	UPREGULATED	-2.359	1	09181 Protein families: metabolism;01009 Protein phosphatases and associated proteins;K03283	K03283	HSPA1_6_8	heat shock 70kDa protein 1/6/8
dark-hl	UPREGULATED	-3.844	1	09181 Protein families: metabolism;01009 Protein phosphatases and associated proteins;K04079	K04079	HSP90A,	molecular chaperone HtpG
dark-hl	UPREGULATED	-1.84	0.987	09181 Protein families: metabolism;01009 Protein phosphatases and associated proteins;K04459	K04459	DUSP,	dual specificity MAP kinase phosphatase [EC:3.1.3.16 3.1.3.48]
dark-hl	UPREGULATED	-2.776	1	09181 Protein families: metabolism;01009 Protein phosphatases and associated proteins;K05694	K05694	PTPRB,	receptor-type tyrosine-protein phosphatase beta [EC:3.1.3.48]
dark-hl	UPREGULATED	-2.765	1	09181 Protein families: metabolism;01009 Protein phosphatases and associated proteins;K06269	K06269	PPP1C	serine/threonine-protein phosphatase PP1 catalytic subunit [EC:3.1.3.16]
dark-hl	UPREGULATED	-2.636	1	09181 Protein families: metabolism;01009 Protein phosphatases and associated proteins;K09574	K09574	FKBP8	FK506-binding protein 8 [EC:5.2.1.8]
dark-hl	UPREGULATED	-2.625	1	09181 Protein families: metabolism;01009 Protein phosphatases and associated proteins;K11648	K11648	SMARCB1,	SWI/SNF-related matrix-associated actin-dependent regulator of chromatin subfamily B member 1
dark-hl	UPREGULATED	-1.84	0.987	09181 Protein families: metabolism;01009 Protein phosphatases and associated proteins;K13216	K13216	PPP1R8,	nuclear inhibitor of protein phosphatase 1 [EC:3.1.4.-]
dark-hl	UPREGULATED	-1.69	0.97	09181 Protein families: metabolism;01009 Protein phosphatases and associated proteins;K14165	K14165	K14165	atypical dual specificity phosphatase [EC:3.1.3.16 3.1.3.48]
dark-hl	UPREGULATED	-1.743	0.974	09181 Protein families: metabolism;01009 Protein phosphatases and associated proteins;K14849	K14849	RRP1	ribosomal RNA-processing protein 1
dark-hl	UPREGULATED	-1.307	0.985	09181 Protein families: metabolism;01009 Protein phosphatases and associated proteins;K15423	K15423	PPP4C	serine/threonine-protein phosphatase 4 catalytic subunit [EC:3.1.3.16]
dark-hl	UPREGULATED	-1.952	1	09181 Protein families: metabolism;01009 Protein phosphatases and associated proteins;K15728	K15728	LPIN	phosphatidate phosphatase LPIN [EC:3.1.3.4]
dark-hl	UPREGULATED	-1.112	0.995	09181 Protein families: metabolism;01009 Protein phosphatases and associated proteins;K15731	K15731	CTDSP	carboxy-terminal domain RNA polymerase II polypeptide A small phosphatase [EC:3.1.3.16]
dark-hl	UPREGULATED	-2.387	0.999	09181 Protein families: metabolism;01009 Protein phosphatases and associated proteins;K17579	K17579	PPP1R42,	protein phosphatase 1 regulatory subunit 42
dark-hl	UPREGULATED	-2.625	1	09181 Protein families: metabolism;01009 Protein phosphatases and associated proteins;K17583	K17583	NOM1	nucleolar MIF4G domain-containing protein 1
dark-hl	UPREGULATED	-1.948	1	09181 Protein families: metabolism;01009 Protein phosphatases and associated proteins;K17593	K17593	ANKRD42,	ankyrin repeat domain-containing protein 42
dark-hl	UPREGULATED	-1.531	0.983	09181 Protein families: metabolism;01009 Protein phosphatases and associated proteins;K17600	K17600	VPS54	vacuolar protein sorting-associated protein 54
dark-hl	UPREGULATED	-1.885	0.989	09181 Protein families: metabolism;01009 Protein phosphatases and associated proteins;K18040	K18040	PTPN23	tyrosine-protein phosphatase non-receptor type 23 [EC:3.1.3.48]
dark-hl	UPREGULATED	-2.625	1	09181 Protein families: metabolism;01009 Protein phosphatases and associated proteins;K18061	K18061	SBF1_2,	myotubularin-related protein 5/13
dark-hl	UPREGULATED	-2.624	1	09181 Protein families: metabolism;01011 Peptidoglycan biosynthesis and degradation proteins;K01000	K01000	mraY	phospho-N-acetylmuramoyl-pentapeptide-transferase [EC:2.7.8.13]
dark-hl	UPREGULATED	-3.685	1	09182 Protein families: genetic information processing;03000 Transcription factors;K07466	K07466	RFA1,	replication factor A1
dark-hl	UPREGULATED	-3.088	1	09182 Protein families: genetic information processing;03000 Transcription factors;K09201	K09201	YY	transcription factor YY
dark-hl	UPREGULATED	-4.171	1	09182 Protein families: genetic information processing;03000 Transcription factors;K09250	K09250	CNBP	cellular nucleic acid-binding protein
dark-hl	UPREGULATED	-1.948	1	09182 Protein families: genetic information processing;03000 Transcription factors;K09329	K09329	PRRX,	paired mesoderm homeobox protein
dark-hl	UPREGULATED	-4.132	1	09182 Protein families: genetic information processing;03000 Transcription factors;K09422	K09422	MYBP	transcription factor MYB, plant
dark-hl	UPREGULATED	-1.794	0.997	09182 Protein families: genetic information processing;03000 Transcription factors;K12412	K12412	MCM1	pheromone receptor transcription factor
dark-hl	UPREGULATED	-1.891	0.991	09182 Protein families: genetic information processing;03000 Transcription factors;K15263	K15263	LYER	cell growth-regulating nucleolar protein
dark-hl	UPREGULATED	-2.477	1	09182 Protein families: genetic information processing;03009 Ribosome biogenesis;K02834	K02834	rbfA	ribosome-binding factor A
dark-hl	UPREGULATED	-3.584	1	09182 Protein families: genetic information processing;03009 Ribosome biogenesis;K02936	K02936	RP-L7Ae,	large subunit ribosomal protein L7Ae
dark-hl	UPREGULATED	-2.906	1	09182 Protein families: genetic information processing;03009 Ribosome biogenesis;K03115	K03115	CSNK2B	casein kinase II subunit beta
dark-hl	UPREGULATED	-2.052	1	09182 Protein families: genetic information processing;03009 Ribosome biogenesis;K03264	K03264	EIF6	translation initiation factor 6
dark-hl	UPREGULATED	-2.359	1	09182 Protein families: genetic information processing;03009 Ribosome biogenesis;K03283	K03283	HSPA1_6_8	heat shock 70kDa protein 1/6/8
dark-hl	UPREGULATED	-1.636	0.953	09182 Protein families: genetic information processing;03009 Ribosome biogenesis;K06182	K06182	rluF	23S rRNA pseudouridine2604 synthase [EC:5.4.99.21]
dark-hl	UPREGULATED	-1.07	0.999	09182 Protein families: genetic information processing;03009 Ribosome biogenesis;K06185	K06185	ABCF2	ATP-binding cassette, subfamily F, member 2
dark-hl	UPREGULATED	-1.918	0.997	09182 Protein families: genetic information processing;03009 Ribosome biogenesis;K06942	K06942	ychF	ribosome-binding ATPase
dark-hl	UPREGULATED	-2.297	1	09182 Protein families: genetic information processing;03009 Ribosome biogenesis;K06943	K06943	NOG1	nucleolar GTP-binding protein
dark-hl	UPREGULATED	-1.408	0.961	09182 Protein families: genetic information processing;03009 Ribosome biogenesis;K06961	K06961	KRR1	ribosomal RNA assembly protein
dark-hl	UPREGULATED	-1.614	1	09182 Protein families: genetic information processing;03009 Ribosome biogenesis;K07179	K07179	RIOK2	RIO kinase 2 [EC:2.7.11.1]
dark-hl	UPREGULATED	-2.7	1	09182 Protein families: genetic information processing;03009 Ribosome biogenesis;K07565	K07565	NIP7	60S ribosome subunit biogenesis protein NIP7
dark-hl	UPREGULATED	-1.511	1	09182 Protein families: genetic information processing;03009 Ribosome biogenesis;K07936	K07936	RAN	GTP-binding nuclear protein Ran
dark-hl	UPREGULATED	-2.814	1	09182 Protein families: genetic information processing;03009 Ribosome biogenesis;K11128	K11128	GAR1,	H/ACA ribonucleoprotein complex subunit 1
dark-hl	UPREGULATED	-3.549	1	09182 Protein families: genetic information processing;03009 Ribosome biogenesis;K11129	K11129	NHP2,	H/ACA ribonucleoprotein complex subunit 2
dark-hl	UPREGULATED	-4.765	1	09182 Protein families: genetic information processing;03009 Ribosome biogenesis;K11130	K11130	NOP10,	H/ACA ribonucleoprotein complex subunit 3
dark-hl	UPREGULATED	-2.799	1	09182 Protein families: genetic information processing;03009 Ribosome biogenesis;K11131	K11131	DKC1,	H/ACA ribonucleoprotein complex subunit 4 [EC:5.4.99.-]
dark-hl	UPREGULATED	-3.944	1	09182 Protein families: genetic information processing;03009 Ribosome biogenesis;K11294	K11294	NCL,	nucleolin
dark-hl	UPREGULATED	-1.838	0.979	09182 Protein families: genetic information processing;03009 Ribosome biogenesis;K11806	K11806	DCAF13,	DDB1- and CUL4-associated factor 13
dark-hl	UPREGULATED	-2.199	0.999	09182 Protein families: genetic information processing;03009 Ribosome biogenesis;K11883	K11883	NOB1	RNA-binding protein NOB1
dark-hl	UPREGULATED	-2.237	0.998	09182 Protein families: genetic information processing;03009 Ribosome biogenesis;K12619	K12619	XRN2,	5'-3' exoribonuclease 2 [EC:3.1.13.-]
dark-hl	UPREGULATED	-2.184	1	09182 Protein families: genetic information processing;03009 Ribosome biogenesis;K12820	K12820	DHX15,	pre-mRNA-splicing factor ATP-dependent RNA helicase DHX15/PRP43 [EC:3.6.4.13]
dark-hl	UPREGULATED	-1.06	0.999	09182 Protein families: genetic information processing;03009 Ribosome biogenesis;K12823	K12823	DDX5,	ATP-dependent RNA helicase DDX5/DBP2 [EC:3.6.4.13]
dark-hl	UPREGULATED	-1.888	1	09182 Protein families: genetic information processing;03009 Ribosome biogenesis;K12845	K12845	SNU13,	U4/U6 small nuclear ribonucleoprotein SNU13
dark-hl	UPREGULATED	-2.611	1	09182 Protein families: genetic information processing;03009 Ribosome biogenesis;K13025	K13025	EIF4A3,	ATP-dependent RNA helicase [EC:3.6.4.13]
dark-hl	UPREGULATED	-2.33	1	09182 Protein families: genetic information processing;03009 Ribosome biogenesis;K13179	K13179	DDX18,	ATP-dependent RNA helicase DDX18/HAS1 [EC:3.6.4.13]
dark-hl	UPREGULATED	-2.69	1	09182 Protein families: genetic information processing;03009 Ribosome biogenesis;K13288	K13288	orn,	oligoribonuclease [EC:3.1.-.-]
dark-hl	UPREGULATED	-1.296	1	09182 Protein families: genetic information processing;03009 Ribosome biogenesis;K13525	K13525	VCP,	transitional endoplasmic reticulum ATPase
dark-hl	UPREGULATED	-1.301	0.964	09182 Protein families: genetic information processing;03009 Ribosome biogenesis;K14015	K14015	NPLOC4,	nuclear protein localization protein 4
dark-hl	UPREGULATED	-1.272	0.975	09182 Protein families: genetic information processing;03009 Ribosome biogenesis;K14191	K14191	DIM1	18S rRNA (adenine1779-N6/adenine1780-N6)-dimethyltransferase [EC:2.1.1.183]
dark-hl	UPREGULATED	-2.411	1	09182 Protein families: genetic information processing;03009 Ribosome biogenesis;K14293	K14293	KPNB1,	importin subunit beta-1
dark-hl	UPREGULATED	-1.93	0.987	09182 Protein families: genetic information processing;03009 Ribosome biogenesis;K14544	K14544	UTP22,	U3 small nucleolar RNA-associated protein 22
dark-hl	UPREGULATED	-2.006	0.996	09182 Protein families: genetic information processing;03009 Ribosome biogenesis;K14549	K14549	UTP15	U3 small nucleolar RNA-associated protein 15
dark-hl	UPREGULATED	-1.93	0.987	09182 Protein families: genetic information processing;03009 Ribosome biogenesis;K14552	K14552	NAN1,	NET1-associated nuclear protein 1 (U3 small nucleolar RNA-associated protein 17)
dark-hl	UPREGULATED	-1.753	1	09182 Protein families: genetic information processing;03009 Ribosome biogenesis;K14554	K14554	UTP21,	U3 small nucleolar RNA-associated protein 21
dark-hl	UPREGULATED	-1.403	0.991	09182 Protein families: genetic information processing;03009 Ribosome biogenesis;K14555	K14555	UTP13,	U3 small nucleolar RNA-associated protein 13
dark-hl	UPREGULATED	-2.006	0.996	09182 Protein families: genetic information processing;03009 Ribosome biogenesis;K14556	K14556	DIP2,	U3 small nucleolar RNA-associated protein 12
dark-hl	UPREGULATED	-2.865	1	09182 Protein families: genetic information processing;03009 Ribosome biogenesis;K14561	K14561	IMP4	U3 small nucleolar ribonucleoprotein protein IMP4
dark-hl	UPREGULATED	-1.853	1	09182 Protein families: genetic information processing;03009 Ribosome biogenesis;K14564	K14564	NOP56	nucleolar protein 56
dark-hl	UPREGULATED	-3.919	1	09182 Protein families: genetic information processing;03009 Ribosome biogenesis;K14565	K14565	NOP58	nucleolar protein 58
dark-hl	UPREGULATED	-1.85	1	09182 Protein families: genetic information processing;03009 Ribosome biogenesis;K14566	K14566	UTP24,	U3 small nucleolar RNA-associated protein 24
dark-hl	UPREGULATED	-2.1	0.994	09182 Protein families: genetic information processing;03009 Ribosome biogenesis;K14568	K14568	EMG1,	rRNA small subunit pseudouridine methyltransferase Nep1 [EC:2.1.1.260]
dark-hl	UPREGULATED	-1.792	0.985	09182 Protein families: genetic information processing;03009 Ribosome biogenesis;K14572	K14572	MDN1,	midasin
dark-hl	UPREGULATED	-1.896	1	09182 Protein families: genetic information processing;03009 Ribosome biogenesis;K14573	K14573	NOP4,	nucleolar protein 4
dark-hl	UPREGULATED	-2.411	1	09182 Protein families: genetic information processing;03009 Ribosome biogenesis;K14765	K14765	NGDN,	U3 small nucleolar ribonucleoprotein protein LCP5
dark-hl	UPREGULATED	-2.292	0.997	09182 Protein families: genetic information processing;03009 Ribosome biogenesis;K14767	K14767	UTP3,	U3 small nucleolar RNA-associated protein 3
dark-hl	UPREGULATED	-1.703	0.999	09182 Protein families: genetic information processing;03009 Ribosome biogenesis;K14768	K14768	UTP7,	U3 small nucleolar RNA-associated protein 7
dark-hl	UPREGULATED	-1.739	0.969	09182 Protein families: genetic information processing;03009 Ribosome biogenesis;K14772	K14772	UTP20	U3 small nucleolar RNA-associated protein 20
dark-hl	UPREGULATED	-3.058	1	09182 Protein families: genetic information processing;03009 Ribosome biogenesis;K14775	K14775	UTP30,	ribosome biogenesis protein UTP30
dark-hl	UPREGULATED	-2.326	0.998	09182 Protein families: genetic information processing;03009 Ribosome biogenesis;K14776	K14776	DDX10,	ATP-dependent RNA helicase DDX10/DBP4 [EC:3.6.4.13]
dark-hl	UPREGULATED	-1.66	0.979	09182 Protein families: genetic information processing;03009 Ribosome biogenesis;K14778	K14778	DDX49,	ATP-dependent RNA helicase DDX49/DBP8 [EC:3.6.4.13]
dark-hl	UPREGULATED	-2.069	0.991	09182 Protein families: genetic information processing;03009 Ribosome biogenesis;K14779	K14779	DDX52,	ATP-dependent RNA helicase DDX52/ROK1 [EC:3.6.4.13]
dark-hl	UPREGULATED	-3.058	1	09182 Protein families: genetic information processing;03009 Ribosome biogenesis;K14783	K14783	CIC1,	proteasome-interacting protein CIC1
dark-hl	UPREGULATED	-1.891	0.991	09182 Protein families: genetic information processing;03009 Ribosome biogenesis;K14785	K14785	ESF2,	ESF2/ABP1 family protein
dark-hl	UPREGULATED	-3.437	1	09182 Protein families: genetic information processing;03009 Ribosome biogenesis;K14788	K14788	NOL10,	ribosome biogenesis protein ENP2
dark-hl	UPREGULATED	-2.831	1	09182 Protein families: genetic information processing;03009 Ribosome biogenesis;K14797	K14797	ENP1,	essential nuclear protein 1
dark-hl	UPREGULATED	-1.93	0.987	09182 Protein families: genetic information processing;03009 Ribosome biogenesis;K14800	K14800	TSR2	pre-rRNA-processing protein TSR2
dark-hl	UPREGULATED	-2.791	1	09182 Protein families: genetic information processing;03009 Ribosome biogenesis;K14805	K14805	DDX24,	ATP-dependent RNA helicase DDX24/MAK5 [EC:3.6.4.13]
dark-hl	UPREGULATED	-2.559	1	09182 Protein families: genetic information processing;03009 Ribosome biogenesis;K14807	K14807	DDX51,	ATP-dependent RNA helicase DDX51/DBP6 [EC:3.6.4.13]
dark-hl	UPREGULATED	-2.1	0.994	09182 Protein families: genetic information processing;03009 Ribosome biogenesis;K14811	K14811	DBP3	ATP-dependent RNA helicase DBP3 [EC:3.6.4.13]
dark-hl	UPREGULATED	-1.786	1	09182 Protein families: genetic information processing;03009 Ribosome biogenesis;K14815	K14815	MRT4	mRNA turnover protein 4
dark-hl	UPREGULATED	-2.52	0.999	09182 Protein families: genetic information processing;03009 Ribosome biogenesis;K14818	K14818	SQT1	ribosome assembly protein SQT1
dark-hl	UPREGULATED	-1.566	0.967	09182 Protein families: genetic information processing;03009 Ribosome biogenesis;K14820	K14820	BRX1,	ribosome biogenesis protein BRX1
dark-hl	UPREGULATED	-2.553	1	09182 Protein families: genetic information processing;03009 Ribosome biogenesis;K14823	K14823	EBP2,	rRNA-processing protein EBP2
dark-hl	UPREGULATED	-2.459	0.999	09182 Protein families: genetic information processing;03009 Ribosome biogenesis;K14824	K14824	ERB1,	ribosome biogenesis protein ERB1
dark-hl	UPREGULATED	-3.012	1	09182 Protein families: genetic information processing;03009 Ribosome biogenesis;K14832	K14832	MAK21,	ribosome biogenesis protein MAK21
dark-hl	UPREGULATED	-2.514	0.999	09182 Protein families: genetic information processing;03009 Ribosome biogenesis;K14833	K14833	NOC2	nucleolar complex protein 2
dark-hl	UPREGULATED	-2.34	1	09182 Protein families: genetic information processing;03009 Ribosome biogenesis;K14835	K14835	NOP2	25S rRNA (cytosine2870-C5)-methyltransferase [EC:2.1.1.310]
dark-hl	UPREGULATED	-2.394	0.999	09182 Protein families: genetic information processing;03009 Ribosome biogenesis;K14837	K14837	NOP12	nucleolar protein 12
dark-hl	UPREGULATED	-2.302	1	09182 Protein families: genetic information processing;03009 Ribosome biogenesis;K14838	K14838	NOP15	nucleolar protein 15
dark-hl	UPREGULATED	-1.875	1	09182 Protein families: genetic information processing;03009 Ribosome biogenesis;K14842	K14842	NSA2	ribosome biogenesis protein NSA2
dark-hl	UPREGULATED	-1.356	0.955	09182 Protein families: genetic information processing;03009 Ribosome biogenesis;K14843	K14843	PES1,	pescadillo
dark-hl	UPREGULATED	-2.028	1	09182 Protein families: genetic information processing;03009 Ribosome biogenesis;K14844	K14844	PUF6	pumilio homology domain family member 6
dark-hl	UPREGULATED	-2.738	1	09182 Protein families: genetic information processing;03009 Ribosome biogenesis;K14847	K14847	RPF2	ribosome production factor 2
dark-hl	UPREGULATED	-1.937	1	09182 Protein families: genetic information processing;03009 Ribosome biogenesis;K14848	K14848	RRB1,	ribosome assembly protein RRB1
dark-hl	UPREGULATED	-1.743	0.974	09182 Protein families: genetic information processing;03009 Ribosome biogenesis;K14849	K14849	RRP1	ribosomal RNA-processing protein 1
dark-hl	UPREGULATED	-3.622	1	09182 Protein families: genetic information processing;03009 Ribosome biogenesis;K14852	K14852	RRS1	regulator of ribosome biosynthesis
dark-hl	UPREGULATED	-2.069	0.991	09182 Protein families: genetic information processing;03009 Ribosome biogenesis;K15262	K15262	BCP1,	protein BCP1
dark-hl	UPREGULATED	-1.891	0.991	09182 Protein families: genetic information processing;03009 Ribosome biogenesis;K15263	K15263	LYER	cell growth-regulating nucleolar protein
dark-hl	UPREGULATED	-1.484	0.974	09182 Protein families: genetic information processing;03009 Ribosome biogenesis;K16911	K16911	DDX21	ATP-dependent RNA helicase DDX21 [EC:3.6.4.13]
dark-hl	UPREGULATED	-1.773	0.996	09182 Protein families: genetic information processing;03009 Ribosome biogenesis;K16914	K16914	RIOX1,	protein-L-histidine (3S)-3-hydroxylase / [histone H3]-trimethyl-L-lysine4/36 demethylase [EC:1.14.11.79 1.14.11.67 1.14.11.69]
dark-hl	UPREGULATED	-2.292	0.997	09182 Protein families: genetic information processing;03009 Ribosome biogenesis;K18532	K18532	AK6,	adenylate kinase [EC:2.7.4.3]
dark-hl	UPREGULATED	-2.333	1	09182 Protein families: genetic information processing;03009 Ribosome biogenesis;K19307	K19307	BMT5	25S rRNA (uracil2634-N3)-methyltransferase [EC:2.1.1.313]
dark-hl	UPREGULATED	-2.12	1	09182 Protein families: genetic information processing;03009 Ribosome biogenesis;K20221	K20221	IPO4,	importin-4
dark-hl	UPREGULATED	-3.229	1	09182 Protein families: genetic information processing;03009 Ribosome biogenesis;K20224	K20224	IPO9,	importin-9
dark-hl	UPREGULATED	-1.566	0.967	09182 Protein families: genetic information processing;03009 Ribosome biogenesis;K22377	K22377	LTN1	E3 ubiquitin-protein ligase listerin [EC:2.3.2.27]
dark-hl	UPREGULATED	-1.907	1	09182 Protein families: genetic information processing;03011 Ribosome;K02863	K02863	RP-L1,	large subunit ribosomal protein L1
dark-hl	UPREGULATED	-4.2	1	09182 Protein families: genetic information processing;03011 Ribosome;K02865	K02865	RP-L10Ae,	large subunit ribosomal protein L10Ae
dark-hl	UPREGULATED	-1.453	1	09182 Protein families: genetic information processing;03011 Ribosome;K02866	K02866	RP-L10e,	large subunit ribosomal protein L10e
dark-hl	UPREGULATED	-1.935	0.987	09182 Protein families: genetic information processing;03011 Ribosome;K02867	K02867	RP-L11,	large subunit ribosomal protein L11
dark-hl	UPREGULATED	-2.923	1	09182 Protein families: genetic information processing;03011 Ribosome;K02870	K02870	RP-L12e,	large subunit ribosomal protein L12e
dark-hl	UPREGULATED	-2.263	1	09182 Protein families: genetic information processing;03011 Ribosome;K02871	K02871	RP-L13,	large subunit ribosomal protein L13
dark-hl	UPREGULATED	-3.457	1	09182 Protein families: genetic information processing;03011 Ribosome;K02872	K02872	RP-L13Ae,	large subunit ribosomal protein L13Ae
dark-hl	UPREGULATED	-2.214	1	09182 Protein families: genetic information processing;03011 Ribosome;K02873	K02873	RP-L13e,	large subunit ribosomal protein L13e
dark-hl	UPREGULATED	-2.549	1	09182 Protein families: genetic information processing;03011 Ribosome;K02875	K02875	RP-L14e,	large subunit ribosomal protein L14e
dark-hl	UPREGULATED	-1.168	1	09182 Protein families: genetic information processing;03011 Ribosome;K02876	K02876	RP-L15,	large subunit ribosomal protein L15
dark-hl	UPREGULATED	-2.248	1	09182 Protein families: genetic information processing;03011 Ribosome;K02877	K02877	RP-L15e,	large subunit ribosomal protein L15e
dark-hl	UPREGULATED	-1.078	0.999	09182 Protein families: genetic information processing;03011 Ribosome;K02879	K02879	RP-L17,	large subunit ribosomal protein L17
dark-hl	UPREGULATED	-2.899	1	09182 Protein families: genetic information processing;03011 Ribosome;K02880	K02880	RP-L17e,	large subunit ribosomal protein L17e
dark-hl	UPREGULATED	-2.613	1	09182 Protein families: genetic information processing;03011 Ribosome;K02883	K02883	RP-L18e,	large subunit ribosomal protein L18e
dark-hl	UPREGULATED	-3.088	1	09182 Protein families: genetic information processing;03011 Ribosome;K02884	K02884	RP-L19,	large subunit ribosomal protein L19
dark-hl	UPREGULATED	-2.552	1	09182 Protein families: genetic information processing;03011 Ribosome;K02885	K02885	RP-L19e,	large subunit ribosomal protein L19e
dark-hl	UPREGULATED	-3.469	1	09182 Protein families: genetic information processing;03011 Ribosome;K02891	K02891	RP-L22e,	large subunit ribosomal protein L22e
dark-hl	UPREGULATED	-2.502	1	09182 Protein families: genetic information processing;03011 Ribosome;K02893	K02893	RP-L23Ae,	large subunit ribosomal protein L23Ae
dark-hl	UPREGULATED	-2.916	1	09182 Protein families: genetic information processing;03011 Ribosome;K02894	K02894	RP-L23e,	large subunit ribosomal protein L23e
dark-hl	UPREGULATED	-2.326	0.998	09182 Protein families: genetic information processing;03011 Ribosome;K02895	K02895	RP-L24,	large subunit ribosomal protein L24
dark-hl	UPREGULATED	-2.028	1	09182 Protein families: genetic information processing;03011 Ribosome;K02896	K02896	RP-L24e,	large subunit ribosomal protein L24e
dark-hl	UPREGULATED	-3.671	1	09182 Protein families: genetic information processing;03011 Ribosome;K02898	K02898	RP-L26e,	large subunit ribosomal protein L26e
dark-hl	UPREGULATED	-2.13	0.994	09182 Protein families: genetic information processing;03011 Ribosome;K02899	K02899	RP-L27,	large subunit ribosomal protein L27
dark-hl	UPREGULATED	-2.4	1	09182 Protein families: genetic information processing;03011 Ribosome;K02901	K02901	RP-L27e,	large subunit ribosomal protein L27e
dark-hl	UPREGULATED	-2.757	1	09182 Protein families: genetic information processing;03011 Ribosome;K02903	K02903	RP-L28e,	large subunit ribosomal protein L28e
dark-hl	UPREGULATED	-1.298	1	09182 Protein families: genetic information processing;03011 Ribosome;K02904	K02904	RP-L29,	large subunit ribosomal protein L29
dark-hl	UPREGULATED	-2.451	1	09182 Protein families: genetic information processing;03011 Ribosome;K02907	K02907	RP-L30,	large subunit ribosomal protein L30
dark-hl	UPREGULATED	-1.453	1	09182 Protein families: genetic information processing;03011 Ribosome;K02908	K02908	RP-L30e,	large subunit ribosomal protein L30e
dark-hl	UPREGULATED	-3.82	1	09182 Protein families: genetic information processing;03011 Ribosome;K02910	K02910	RP-L31e,	large subunit ribosomal protein L31e
dark-hl	UPREGULATED	-1.948	1	09182 Protein families: genetic information processing;03011 Ribosome;K02912	K02912	RP-L32e,	large subunit ribosomal protein L32e
dark-hl	UPREGULATED	-2.682	1	09182 Protein families: genetic information processing;03011 Ribosome;K02915	K02915	RP-L34e,	large subunit ribosomal protein L34e
dark-hl	UPREGULATED	-2.136	1	09182 Protein families: genetic information processing;03011 Ribosome;K02917	K02917	RP-L35Ae,	large subunit ribosomal protein L35Ae
dark-hl	UPREGULATED	-3.413	1	09182 Protein families: genetic information processing;03011 Ribosome;K02918	K02918	RP-L35e,	large subunit ribosomal protein L35e
dark-hl	UPREGULATED	-2.906	1	09182 Protein families: genetic information processing;03011 Ribosome;K02920	K02920	RP-L36e,	large subunit ribosomal protein L36e
dark-hl	UPREGULATED	-2.408	1	09182 Protein families: genetic information processing;03011 Ribosome;K02921	K02921	RP-L37Ae,	large subunit ribosomal protein L37Ae
dark-hl	UPREGULATED	-2.765	1	09182 Protein families: genetic information processing;03011 Ribosome;K02922	K02922	RP-L37e,	large subunit ribosomal protein L37e
dark-hl	UPREGULATED	-1.272	1	09182 Protein families: genetic information processing;03011 Ribosome;K02923	K02923	RP-L38e,	large subunit ribosomal protein L38e
dark-hl	UPREGULATED	-2.236	1	09182 Protein families: genetic information processing;03011 Ribosome;K02924	K02924	RP-L39e,	large subunit ribosomal protein L39e
dark-hl	UPREGULATED	-3.413	1	09182 Protein families: genetic information processing;03011 Ribosome;K02925	K02925	RP-L3e,	large subunit ribosomal protein L3e
dark-hl	UPREGULATED	-2.414	1	09182 Protein families: genetic information processing;03011 Ribosome;K02926	K02926	RP-L4,	large subunit ribosomal protein L4
dark-hl	UPREGULATED	-2.485	1	09182 Protein families: genetic information processing;03011 Ribosome;K02929	K02929	RP-L44e,	large subunit ribosomal protein L44e
dark-hl	UPREGULATED	-2.458	1	09182 Protein families: genetic information processing;03011 Ribosome;K02930	K02930	RP-L4e,	large subunit ribosomal protein L4e
dark-hl	UPREGULATED	-3.629	1	09182 Protein families: genetic information processing;03011 Ribosome;K02932	K02932	RP-L5e,	large subunit ribosomal protein L5e
dark-hl	UPREGULATED	-1.943	1	09182 Protein families: genetic information processing;03011 Ribosome;K02934	K02934	RP-L6e,	large subunit ribosomal protein L6e
dark-hl	UPREGULATED	-1.907	1	09182 Protein families: genetic information processing;03011 Ribosome;K02935	K02935	RP-L7,	large subunit ribosomal protein L7/L12
dark-hl	UPREGULATED	-3.584	1	09182 Protein families: genetic information processing;03011 Ribosome;K02936	K02936	RP-L7Ae,	large subunit ribosomal protein L7Ae
dark-hl	UPREGULATED	-2.788	1	09182 Protein families: genetic information processing;03011 Ribosome;K02937	K02937	RP-L7e,	large subunit ribosomal protein L7e
dark-hl	UPREGULATED	-3.272	1	09182 Protein families: genetic information processing;03011 Ribosome;K02938	K02938	RP-L8e,	large subunit ribosomal protein L8e
dark-hl	UPREGULATED	-3.413	1	09182 Protein families: genetic information processing;03011 Ribosome;K02939	K02939	RP-L9,	large subunit ribosomal protein L9
dark-hl	UPREGULATED	-3.376	1	09182 Protein families: genetic information processing;03011 Ribosome;K02940	K02940	RP-L9e,	large subunit ribosomal protein L9e
dark-hl	UPREGULATED	-3.147	1	09182 Protein families: genetic information processing;03011 Ribosome;K02941	K02941	RP-LP0,	large subunit ribosomal protein LP0
dark-hl	UPREGULATED	-2.112	1	09182 Protein families: genetic information processing;03011 Ribosome;K02942	K02942	RP-LP1,	large subunit ribosomal protein LP1
dark-hl	UPREGULATED	-2.292	1	09182 Protein families: genetic information processing;03011 Ribosome;K02943	K02943	RP-LP2,	large subunit ribosomal protein LP2
dark-hl	UPREGULATED	-1.66	0.979	09182 Protein families: genetic information processing;03011 Ribosome;K02946	K02946	RP-S10,	small subunit ribosomal protein S10
dark-hl	UPREGULATED	-4.132	1	09182 Protein families: genetic information processing;03011 Ribosome;K02947	K02947	RP-S10e,	small subunit ribosomal protein S10e
dark-hl	UPREGULATED	-2.336	1	09182 Protein families: genetic information processing;03011 Ribosome;K02949	K02949	RP-S11e,	small subunit ribosomal protein S11e
dark-hl	UPREGULATED	-2.232	1	09182 Protein families: genetic information processing;03011 Ribosome;K02951	K02951	RP-S12e,	small subunit ribosomal protein S12e
dark-hl	UPREGULATED	-3.271	1	09182 Protein families: genetic information processing;03011 Ribosome;K02953	K02953	RP-S13e,	small subunit ribosomal protein S13e
dark-hl	UPREGULATED	-2.624	1	09182 Protein families: genetic information processing;03011 Ribosome;K02955	K02955	RP-S14e,	small subunit ribosomal protein S14e
dark-hl	UPREGULATED	-2.098	1	09182 Protein families: genetic information processing;03011 Ribosome;K02956	K02956	RP-S15,	small subunit ribosomal protein S15
dark-hl	UPREGULATED	-2.509	1	09182 Protein families: genetic information processing;03011 Ribosome;K02957	K02957	RP-S15Ae,	small subunit ribosomal protein S15Ae
dark-hl	UPREGULATED	-1.95	0.994	09182 Protein families: genetic information processing;03011 Ribosome;K02959	K02959	RP-S16,	small subunit ribosomal protein S16
dark-hl	UPREGULATED	-2.741	1	09182 Protein families: genetic information processing;03011 Ribosome;K02960	K02960	RP-S16e,	small subunit ribosomal protein S16e
dark-hl	UPREGULATED	-2.559	1	09182 Protein families: genetic information processing;03011 Ribosome;K02962	K02962	RP-S17e,	small subunit ribosomal protein S17e
dark-hl	UPREGULATED	-2.422	1	09182 Protein families: genetic information processing;03011 Ribosome;K02964	K02964	RP-S18e,	small subunit ribosomal protein S18e
dark-hl	UPREGULATED	-1.599	1	09182 Protein families: genetic information processing;03011 Ribosome;K02966	K02966	RP-S19e,	small subunit ribosomal protein S19e
dark-hl	UPREGULATED	-3.786	1	09182 Protein families: genetic information processing;03011 Ribosome;K02969	K02969	RP-S20e,	small subunit ribosomal protein S20e
dark-hl	UPREGULATED	-2.33	1	09182 Protein families: genetic information processing;03011 Ribosome;K02971	K02971	RP-S21e,	small subunit ribosomal protein S21e
dark-hl	UPREGULATED	-2.809	1	09182 Protein families: genetic information processing;03011 Ribosome;K02973	K02973	RP-S23e,	small subunit ribosomal protein S23e
dark-hl	UPREGULATED	-3.132	1	09182 Protein families: genetic information processing;03011 Ribosome;K02974	K02974	RP-S24e,	small subunit ribosomal protein S24e
dark-hl	UPREGULATED	-2.963	1	09182 Protein families: genetic information processing;03011 Ribosome;K02976	K02976	RP-S26e,	small subunit ribosomal protein S26e
dark-hl	UPREGULATED	-1.706	1	09182 Protein families: genetic information processing;03011 Ribosome;K02977	K02977	RP-S27Ae,	ubiquitin-small subunit ribosomal protein S27Ae
dark-hl	UPREGULATED	-2.625	1	09182 Protein families: genetic information processing;03011 Ribosome;K02978	K02978	RP-S27e,	small subunit ribosomal protein S27e
dark-hl	UPREGULATED	-2.25	1	09182 Protein families: genetic information processing;03011 Ribosome;K02979	K02979	RP-S28e,	small subunit ribosomal protein S28e
dark-hl	UPREGULATED	-2.352	1	09182 Protein families: genetic information processing;03011 Ribosome;K02980	K02980	RP-S29e,	small subunit ribosomal protein S29e
dark-hl	UPREGULATED	-2.031	1	09182 Protein families: genetic information processing;03011 Ribosome;K02981	K02981	RP-S2e,	small subunit ribosomal protein S2e
dark-hl	UPREGULATED	-1.926	1	09182 Protein families: genetic information processing;03011 Ribosome;K02983	K02983	RP-S30e,	small subunit ribosomal protein S30e
dark-hl	UPREGULATED	-3.34	1	09182 Protein families: genetic information processing;03011 Ribosome;K02984	K02984	RP-S3Ae,	small subunit ribosomal protein S3Ae
dark-hl	UPREGULATED	-3.406	1	09182 Protein families: genetic information processing;03011 Ribosome;K02985	K02985	RP-S3e,	small subunit ribosomal protein S3e
dark-hl	UPREGULATED	-2.979	1	09182 Protein families: genetic information processing;03011 Ribosome;K02987	K02987	RP-S4e,	small subunit ribosomal protein S4e
dark-hl	UPREGULATED	-2.36	1	09182 Protein families: genetic information processing;03011 Ribosome;K02989	K02989	RP-S5e,	small subunit ribosomal protein S5e
dark-hl	UPREGULATED	-2.332	1	09182 Protein families: genetic information processing;03011 Ribosome;K02991	K02991	RP-S6e,	small subunit ribosomal protein S6e
dark-hl	UPREGULATED	-2.127	1	09182 Protein families: genetic information processing;03011 Ribosome;K02993	K02993	RP-S7e,	small subunit ribosomal protein S7e
dark-hl	UPREGULATED	-2.42	1	09182 Protein families: genetic information processing;03011 Ribosome;K02995	K02995	RP-S8e,	small subunit ribosomal protein S8e
dark-hl	UPREGULATED	-3.025	1	09182 Protein families: genetic information processing;03011 Ribosome;K02997	K02997	RP-S9e,	small subunit ribosomal protein S9e
dark-hl	UPREGULATED	-3.252	1	09182 Protein families: genetic information processing;03011 Ribosome;K02998	K02998	RP-SAe,	small subunit ribosomal protein SAe
dark-hl	UPREGULATED	-2.69	1	09182 Protein families: genetic information processing;03011 Ribosome;K17412	K17412	MRPS34	small subunit ribosomal protein S34
dark-hl	UPREGULATED	-1.93	0.987	09182 Protein families: genetic information processing;03011 Ribosome;K17430	K17430	MRPL49,	large subunit ribosomal protein L49
dark-hl	UPREGULATED	-3.82	1	09182 Protein families: genetic information processing;03011 Ribosome;K17433	K17433	MRPL52	large subunit ribosomal protein L52
dark-hl	UPREGULATED	-1.979	0.99	09182 Protein families: genetic information processing;03011 Ribosome;K17435	K17435	MRPL54	large subunit ribosomal protein L54
dark-hl	UPREGULATED	-2.432	0.999	09182 Protein families: genetic information processing;03012 Translation factors;K02355	K02355	fusA,	elongation factor G
dark-hl	UPREGULATED	-2.784	1	09182 Protein families: genetic information processing;03012 Translation factors;K02357	K02357	tsf,	elongation factor Ts
dark-hl	UPREGULATED	-2.25	1	09182 Protein families: genetic information processing;03012 Translation factors;K02493	K02493	hemK,	release factor glutamine methyltransferase [EC:2.1.1.297]
dark-hl	UPREGULATED	-1.531	0.983	09182 Protein families: genetic information processing;03012 Translation factors;K02519	K02519	infB,	translation initiation factor IF-2
dark-hl	UPREGULATED	-1.934	1	09182 Protein families: genetic information processing;03012 Translation factors;K02520	K02520	infC,	translation initiation factor IF-3
dark-hl	UPREGULATED	-1.766	1	09182 Protein families: genetic information processing;03012 Translation factors;K03231	K03231	EEF1A	elongation factor 1-alpha
dark-hl	UPREGULATED	-3.774	1	09182 Protein families: genetic information processing;03012 Translation factors;K03234	K03234	EEF2	elongation factor 2
dark-hl	UPREGULATED	-1.162	1	09182 Protein families: genetic information processing;03012 Translation factors;K03235	K03235	EF3,	elongation factor 3
dark-hl	UPREGULATED	-2.184	1	09182 Protein families: genetic information processing;03012 Translation factors;K03237	K03237	EIF2S1	translation initiation factor 2 subunit 1
dark-hl	UPREGULATED	-2.523	1	09182 Protein families: genetic information processing;03012 Translation factors;K03239	K03239	EIF2B1	translation initiation factor eIF-2B subunit alpha
dark-hl	UPREGULATED	-1.915	1	09182 Protein families: genetic information processing;03012 Translation factors;K03242	K03242	EIF2S3	translation initiation factor 2 subunit 3
dark-hl	UPREGULATED	-3.522	1	09182 Protein families: genetic information processing;03012 Translation factors;K03246	K03246	EIF3I	translation initiation factor 3 subunit I
dark-hl	UPREGULATED	-4.56	1	09182 Protein families: genetic information processing;03012 Translation factors;K03247	K03247	EIF3H	translation initiation factor 3 subunit H
dark-hl	UPREGULATED	-2.53	1	09182 Protein families: genetic information processing;03012 Translation factors;K03248	K03248	EIF3G	translation initiation factor 3 subunit G
dark-hl	UPREGULATED	-2.872	1	09182 Protein families: genetic information processing;03012 Translation factors;K03249	K03249	EIF3F	translation initiation factor 3 subunit F
dark-hl	UPREGULATED	-2.942	1	09182 Protein families: genetic information processing;03012 Translation factors;K03251	K03251	EIF3D	translation initiation factor 3 subunit D
dark-hl	UPREGULATED	-3.293	1	09182 Protein families: genetic information processing;03012 Translation factors;K03252	K03252	EIF3C	translation initiation factor 3 subunit C
dark-hl	UPREGULATED	-4.394	1	09182 Protein families: genetic information processing;03012 Translation factors;K03253	K03253	EIF3B	translation initiation factor 3 subunit B
dark-hl	UPREGULATED	-1.479	0.992	09182 Protein families: genetic information processing;03012 Translation factors;K03254	K03254	EIF3A	translation initiation factor 3 subunit A
dark-hl	UPREGULATED	-3.311	1	09182 Protein families: genetic information processing;03012 Translation factors;K03257	K03257	EIF4A	translation initiation factor 4A
dark-hl	UPREGULATED	-2.474	0.999	09182 Protein families: genetic information processing;03012 Translation factors;K03258	K03258	EIF4B	translation initiation factor 4B
dark-hl	UPREGULATED	-2.846	1	09182 Protein families: genetic information processing;03012 Translation factors;K03259	K03259	EIF4E	translation initiation factor 4E
dark-hl	UPREGULATED	-1.935	0.987	09182 Protein families: genetic information processing;03012 Translation factors;K03260	K03260	EIF4G	translation initiation factor 4G
dark-hl	UPREGULATED	-1.939	1	09182 Protein families: genetic information processing;03012 Translation factors;K03262	K03262	EIF5	translation initiation factor 5
dark-hl	UPREGULATED	-2.639	1	09182 Protein families: genetic information processing;03012 Translation factors;K03263	K03263	EIF5A	translation initiation factor 5A
dark-hl	UPREGULATED	-2.052	1	09182 Protein families: genetic information processing;03012 Translation factors;K03264	K03264	EIF6	translation initiation factor 6
dark-hl	UPREGULATED	-2.456	1	09182 Protein families: genetic information processing;03012 Translation factors;K03265	K03265	ETF1,	peptide chain release factor subunit 1
dark-hl	UPREGULATED	-1.816	1	09182 Protein families: genetic information processing;03012 Translation factors;K03267	K03267	ERF3,	peptide chain release factor subunit 3
dark-hl	UPREGULATED	-1.838	0.979	09182 Protein families: genetic information processing;03012 Translation factors;K06158	K06158	ABCF3	ATP-binding cassette, subfamily F, member 3
dark-hl	UPREGULATED	-2.611	1	09182 Protein families: genetic information processing;03012 Translation factors;K13025	K13025	EIF4A3,	ATP-dependent RNA helicase [EC:3.6.4.13]
dark-hl	UPREGULATED	-4.149	1	09182 Protein families: genetic information processing;03012 Translation factors;K15028	K15028	EIF3K	translation initiation factor 3 subunit K
dark-hl	UPREGULATED	-4.554	1	09182 Protein families: genetic information processing;03012 Translation factors;K15029	K15029	EIF3L	translation initiation factor 3 subunit L
dark-hl	UPREGULATED	-3.224	1	09182 Protein families: genetic information processing;03012 Translation factors;K15030	K15030	EIF3M	translation initiation factor 3 subunit M
dark-hl	UPREGULATED	-2.474	0.999	09182 Protein families: genetic information processing;03012 Translation factors;K15448	K15448	TRM112,	multifunctional methyltransferase subunit TRM112
dark-hl	UPREGULATED	-2.171	0.997	09182 Protein families: genetic information processing;03012 Translation factors;K18995	K18995	DHX29	ATP-dependent RNA helicase DHX29 [EC:3.6.4.13]
dark-hl	UPREGULATED	-3.052	1	09182 Protein families: genetic information processing;03012 Translation factors;K19589	K19589	N6AMT1	release factor glutamine methyltransferase [EC:2.1.1.297]
dark-hl	UPREGULATED	-2.784	1	09182 Protein families: genetic information processing;03012 Translation factors;K21803	K21803	METTL21B,	EEF1A lysine methyltransferase 3 [EC:2.1.1.-]
dark-hl	UPREGULATED	-1.457	1	09182 Protein families: genetic information processing;03016 Transfer RNA biogenesis;K00791	K00791	miaA,	tRNA dimethylallyltransferase [EC:2.5.1.75]
dark-hl	UPREGULATED	-3.132	1	09182 Protein families: genetic information processing;03016 Transfer RNA biogenesis;K01008	K01008	selD,	selenide, water dikinase [EC:2.7.9.3]
dark-hl	UPREGULATED	-1.44	1	09182 Protein families: genetic information processing;03016 Transfer RNA biogenesis;K01866	K01866	YARS,	tyrosyl-tRNA synthetase [EC:6.1.1.1]
dark-hl	UPREGULATED	-1.66	0.979	09182 Protein families: genetic information processing;03016 Transfer RNA biogenesis;K01867	K01867	WARS,	tryptophanyl-tRNA synthetase [EC:6.1.1.2]
dark-hl	UPREGULATED	-1.293	0.983	09182 Protein families: genetic information processing;03016 Transfer RNA biogenesis;K01868	K01868	TARS,	threonyl-tRNA synthetase [EC:6.1.1.3]
dark-hl	UPREGULATED	-2.333	1	09182 Protein families: genetic information processing;03016 Transfer RNA biogenesis;K01869	K01869	LARS,	leucyl-tRNA synthetase [EC:6.1.1.4]
dark-hl	UPREGULATED	-1.918	0.997	09182 Protein families: genetic information processing;03016 Transfer RNA biogenesis;K01870	K01870	IARS,	isoleucyl-tRNA synthetase [EC:6.1.1.5]
dark-hl	UPREGULATED	-2.063	1	09182 Protein families: genetic information processing;03016 Transfer RNA biogenesis;K01873	K01873	VARS,	valyl-tRNA synthetase [EC:6.1.1.9]
dark-hl	UPREGULATED	-2.596	1	09182 Protein families: genetic information processing;03016 Transfer RNA biogenesis;K01874	K01874	MARS,	methionyl-tRNA synthetase [EC:6.1.1.10]
dark-hl	UPREGULATED	-1.92	1	09182 Protein families: genetic information processing;03016 Transfer RNA biogenesis;K01875	K01875	SARS,	seryl-tRNA synthetase [EC:6.1.1.11]
dark-hl	UPREGULATED	-3.486	1	09182 Protein families: genetic information processing;03016 Transfer RNA biogenesis;K01876	K01876	DARS2,	aspartyl-tRNA synthetase [EC:6.1.1.12]
dark-hl	UPREGULATED	-2.659	1	09182 Protein families: genetic information processing;03016 Transfer RNA biogenesis;K01885	K01885	EARS,	glutamyl-tRNA synthetase [EC:6.1.1.17]
dark-hl	UPREGULATED	-2.236	1	09182 Protein families: genetic information processing;03016 Transfer RNA biogenesis;K01886	K01886	QARS,	glutaminyl-tRNA synthetase [EC:6.1.1.18]
dark-hl	UPREGULATED	-2.89	1	09182 Protein families: genetic information processing;03016 Transfer RNA biogenesis;K01887	K01887	RARS,	arginyl-tRNA synthetase [EC:6.1.1.19]
dark-hl	UPREGULATED	-3.985	1	09182 Protein families: genetic information processing;03016 Transfer RNA biogenesis;K01889	K01889	FARSA,	phenylalanyl-tRNA synthetase alpha chain [EC:6.1.1.20]
dark-hl	UPREGULATED	-4.45	1	09182 Protein families: genetic information processing;03016 Transfer RNA biogenesis;K01890	K01890	FARSB,	phenylalanyl-tRNA synthetase beta chain [EC:6.1.1.20]
dark-hl	UPREGULATED	-3.333	1	09182 Protein families: genetic information processing;03016 Transfer RNA biogenesis;K01892	K01892	HARS,	histidyl-tRNA synthetase [EC:6.1.1.21]
dark-hl	UPREGULATED	-1.796	1	09182 Protein families: genetic information processing;03016 Transfer RNA biogenesis;K01893	K01893	NARS,	asparaginyl-tRNA synthetase [EC:6.1.1.22]
dark-hl	UPREGULATED	-2.459	0.999	09182 Protein families: genetic information processing;03016 Transfer RNA biogenesis;K01894	K01894	gluQ	glutamyl-Q tRNA(Asp) synthetase [EC:6.1.1.-]
dark-hl	UPREGULATED	-1.766	1	09182 Protein families: genetic information processing;03016 Transfer RNA biogenesis;K03231	K03231	EEF1A	elongation factor 1-alpha
dark-hl	UPREGULATED	-1.219	0.993	09182 Protein families: genetic information processing;03016 Transfer RNA biogenesis;K04567	K04567	KARS,	lysyl-tRNA synthetase, class II [EC:6.1.1.6]
dark-hl	UPREGULATED	-2.1	0.992	09182 Protein families: genetic information processing;03016 Transfer RNA biogenesis;K05539	K05539	dusA	tRNA-dihydrouridine synthase A [EC:1.-.-.-]
dark-hl	UPREGULATED	-2.1	0.992	09182 Protein families: genetic information processing;03016 Transfer RNA biogenesis;K05542	K05542	DUS1	tRNA-dihydrouridine synthase 1 [EC:1.3.1.88]
dark-hl	UPREGULATED	-2.003	1	09182 Protein families: genetic information processing;03016 Transfer RNA biogenesis;K07442	K07442	TRM61,	tRNA (adenine57-N1/adenine58-N1)-methyltransferase catalytic subunit [EC:2.1.1.219 2.1.1.220]
dark-hl	UPREGULATED	-1.511	1	09182 Protein families: genetic information processing;03016 Transfer RNA biogenesis;K07936	K07936	RAN	GTP-binding nuclear protein Ran
dark-hl	UPREGULATED	-2.237	0.998	09182 Protein families: genetic information processing;03016 Transfer RNA biogenesis;K12619	K12619	XRN2,	5'-3' exoribonuclease 2 [EC:3.1.13.-]
dark-hl	UPREGULATED	-1.84	0.987	09182 Protein families: genetic information processing;03016 Transfer RNA biogenesis;K14163	K14163	EPRS	bifunctional glutamyl/prolyl-tRNA synthetase [EC:6.1.1.17 6.1.1.15]
dark-hl	UPREGULATED	-2.459	0.999	09182 Protein families: genetic information processing;03016 Transfer RNA biogenesis;K15437	K15437	AIMP1,	aminoacyl tRNA synthase complex-interacting multifunctional protein 1
dark-hl	UPREGULATED	-2.474	0.999	09182 Protein families: genetic information processing;03016 Transfer RNA biogenesis;K15448	K15448	TRM112,	multifunctional methyltransferase subunit TRM112
dark-hl	UPREGULATED	-1.885	0.989	09182 Protein families: genetic information processing;03016 Transfer RNA biogenesis;K15865	K15865	CDKAL1	threonylcarbamoyladenosine tRNA methylthiotransferase CDKAL1 [EC:2.8.4.5]
dark-hl	UPREGULATED	-3.486	1	09182 Protein families: genetic information processing;03016 Transfer RNA biogenesis;K22503	K22503	DARS1	aspartyl-tRNA synthetase [EC:6.1.1.12]
dark-hl	UPREGULATED	-3.02	1	09182 Protein families: genetic information processing;03019 Messenger RNA biogenesis;K03015	K03015	RPB7,	DNA-directed RNA polymerase II subunit RPB7
dark-hl	UPREGULATED	-1.766	1	09182 Protein families: genetic information processing;03019 Messenger RNA biogenesis;K03231	K03231	EEF1A	elongation factor 1-alpha
dark-hl	UPREGULATED	-4.394	1	09182 Protein families: genetic information processing;03019 Messenger RNA biogenesis;K03253	K03253	EIF3B	translation initiation factor 3 subunit B
dark-hl	UPREGULATED	-3.311	1	09182 Protein families: genetic information processing;03019 Messenger RNA biogenesis;K03257	K03257	EIF4A	translation initiation factor 4A
dark-hl	UPREGULATED	-2.474	0.999	09182 Protein families: genetic information processing;03019 Messenger RNA biogenesis;K03258	K03258	EIF4B	translation initiation factor 4B
dark-hl	UPREGULATED	-2.846	1	09182 Protein families: genetic information processing;03019 Messenger RNA biogenesis;K03259	K03259	EIF4E	translation initiation factor 4E
dark-hl	UPREGULATED	-1.935	0.987	09182 Protein families: genetic information processing;03019 Messenger RNA biogenesis;K03260	K03260	EIF4G	translation initiation factor 4G
dark-hl	UPREGULATED	-2.456	1	09182 Protein families: genetic information processing;03019 Messenger RNA biogenesis;K03265	K03265	ETF1,	peptide chain release factor subunit 1
dark-hl	UPREGULATED	-1.816	1	09182 Protein families: genetic information processing;03019 Messenger RNA biogenesis;K03267	K03267	ERF3,	peptide chain release factor subunit 3
dark-hl	UPREGULATED	-2.456	1	09182 Protein families: genetic information processing;03019 Messenger RNA biogenesis;K04043	K04043	dnaK,	molecular chaperone DnaK
dark-hl	UPREGULATED	-1.322	1	09182 Protein families: genetic information processing;03019 Messenger RNA biogenesis;K04077	K04077	groEL,	chaperonin GroEL [EC:5.6.1.7]
dark-hl	UPREGULATED	-2.765	1	09182 Protein families: genetic information processing;03019 Messenger RNA biogenesis;K06269	K06269	PPP1C	serine/threonine-protein phosphatase PP1 catalytic subunit [EC:3.1.3.16]
dark-hl	UPREGULATED	-2.408	1	09182 Protein families: genetic information processing;03019 Messenger RNA biogenesis;K07374	K07374	TUBA	tubulin alpha
dark-hl	UPREGULATED	-2.017	0.99	09182 Protein families: genetic information processing;03019 Messenger RNA biogenesis;K07573	K07573	CSL4,	exosome complex component CSL4
dark-hl	UPREGULATED	-1.511	1	09182 Protein families: genetic information processing;03019 Messenger RNA biogenesis;K07936	K07936	RAN	GTP-binding nuclear protein Ran
dark-hl	UPREGULATED	-2.411	1	09182 Protein families: genetic information processing;03019 Messenger RNA biogenesis;K08873	K08873	SMG1	serine/threonine-protein kinase SMG1 [EC:2.7.11.1]
dark-hl	UPREGULATED	-1.531	0.983	09182 Protein families: genetic information processing;03019 Messenger RNA biogenesis;K10357	K10357	MYO5	myosin V
dark-hl	UPREGULATED	-1.939	1	09182 Protein families: genetic information processing;03019 Messenger RNA biogenesis;K10683	K10683	BARD1	BRCA1-associated RING domain protein 1
dark-hl	UPREGULATED	-1.85	1	09182 Protein families: genetic information processing;03019 Messenger RNA biogenesis;K11086	K11086	SNRPB,	small nuclear ribonucleoprotein B and B'
dark-hl	UPREGULATED	-2.003	1	09182 Protein families: genetic information processing;03019 Messenger RNA biogenesis;K11088	K11088	SNRPD3,	small nuclear ribonucleoprotein D3
dark-hl	UPREGULATED	-2.006	1	09182 Protein families: genetic information processing;03019 Messenger RNA biogenesis;K11097	K11097	SNRPE,	small nuclear ribonucleoprotein E
dark-hl	UPREGULATED	-2.39	1	09182 Protein families: genetic information processing;03019 Messenger RNA biogenesis;K11098	K11098	SNRPF,	small nuclear ribonucleoprotein F
dark-hl	UPREGULATED	-2.984	1	09182 Protein families: genetic information processing;03019 Messenger RNA biogenesis;K11099	K11099	SNRPG,	small nuclear ribonucleoprotein G
dark-hl	UPREGULATED	-3.786	1	09182 Protein families: genetic information processing;03019 Messenger RNA biogenesis;K11493	K11493	RCC1	regulator of chromosome condensation
dark-hl	UPREGULATED	-1.445	0.994	09182 Protein families: genetic information processing;03019 Messenger RNA biogenesis;K12580	K12580	CNOT3,	CCR4-NOT transcription complex subunit 3
dark-hl	UPREGULATED	-2.232	1	09182 Protein families: genetic information processing;03019 Messenger RNA biogenesis;K12581	K12581	CNOT7_8,	CCR4-NOT transcription complex subunit 7/8
dark-hl	UPREGULATED	-3.162	1	09182 Protein families: genetic information processing;03019 Messenger RNA biogenesis;K12599	K12599	SKI2,	antiviral helicase SKI2 [EC:3.6.4.13]
dark-hl	UPREGULATED	-1.935	0.987	09182 Protein families: genetic information processing;03019 Messenger RNA biogenesis;K12605	K12605	CNOT2,	CCR4-NOT transcription complex subunit 2
dark-hl	UPREGULATED	-4.72	1	09182 Protein families: genetic information processing;03019 Messenger RNA biogenesis;K12608	K12608	CAF16	CCR4-NOT complex subunit CAF16
dark-hl	UPREGULATED	-2.237	0.998	09182 Protein families: genetic information processing;03019 Messenger RNA biogenesis;K12619	K12619	XRN2,	5'-3' exoribonuclease 2 [EC:3.1.13.-]
dark-hl	UPREGULATED	-2.006	0.996	09182 Protein families: genetic information processing;03019 Messenger RNA biogenesis;K12621	K12621	LSM2	U6 snRNA-associated Sm-like protein LSm2
dark-hl	UPREGULATED	-3.707	1	09182 Protein families: genetic information processing;03019 Messenger RNA biogenesis;K12741	K12741	HNRNPA1_3	heterogeneous nuclear ribonucleoprotein A1/A3
dark-hl	UPREGULATED	-2.549	1	09182 Protein families: genetic information processing;03019 Messenger RNA biogenesis;K12867	K12867	SYF1,	pre-mRNA-splicing factor SYF1
dark-hl	UPREGULATED	-2.615	1	09182 Protein families: genetic information processing;03019 Messenger RNA biogenesis;K12876	K12876	RBM8A,	RNA-binding protein 8A
dark-hl	UPREGULATED	-1.773	0.998	09182 Protein families: genetic information processing;03019 Messenger RNA biogenesis;K12877	K12877	MAGOH	protein mago nashi
dark-hl	UPREGULATED	-2.69	1	09182 Protein families: genetic information processing;03019 Messenger RNA biogenesis;K12882	K12882	NCBP1,	nuclear cap-binding protein subunit 1
dark-hl	UPREGULATED	-2.459	0.999	09182 Protein families: genetic information processing;03019 Messenger RNA biogenesis;K12883	K12883	NCBP2,	nuclear cap-binding protein subunit 2
dark-hl	UPREGULATED	-3.921	1	09182 Protein families: genetic information processing;03019 Messenger RNA biogenesis;K12889	K12889	PCBP1	poly(rC)-binding protein 1
dark-hl	UPREGULATED	-2.611	1	09182 Protein families: genetic information processing;03019 Messenger RNA biogenesis;K13025	K13025	EIF4A3,	ATP-dependent RNA helicase [EC:3.6.4.13]
dark-hl	UPREGULATED	-1.739	0.969	09182 Protein families: genetic information processing;03019 Messenger RNA biogenesis;K13126	K13126	PABPC	polyadenylate-binding protein
dark-hl	UPREGULATED	-3.921	1	09182 Protein families: genetic information processing;03019 Messenger RNA biogenesis;K13162	K13162	PCBP2	poly(rC)-binding protein 2
dark-hl	UPREGULATED	-1.743	0.974	09182 Protein families: genetic information processing;03019 Messenger RNA biogenesis;K13174	K13174	THOC5	THO complex subunit 5
dark-hl	UPREGULATED	-1.979	0.99	09182 Protein families: genetic information processing;03019 Messenger RNA biogenesis;K13176	K13176	THOC7	THO complex subunit 7
dark-hl	UPREGULATED	-2.852	1	09182 Protein families: genetic information processing;03019 Messenger RNA biogenesis;K13190	K13190	RBM15	RNA-binding protein 15
dark-hl	UPREGULATED	-1.66	0.979	09182 Protein families: genetic information processing;03019 Messenger RNA biogenesis;K13210	K13210	FUBP	far upstream element-binding protein
dark-hl	UPREGULATED	-2.69	1	09182 Protein families: genetic information processing;03019 Messenger RNA biogenesis;K13288	K13288	orn,	oligoribonuclease [EC:3.1.-.-]
dark-hl	UPREGULATED	-1.296	1	09182 Protein families: genetic information processing;03019 Messenger RNA biogenesis;K13525	K13525	VCP,	transitional endoplasmic reticulum ATPase
dark-hl	UPREGULATED	-2.579	0.999	09182 Protein families: genetic information processing;03019 Messenger RNA biogenesis;K14298	K14298	RAE1,	mRNA export factor
dark-hl	UPREGULATED	-1.739	0.969	09182 Protein families: genetic information processing;03019 Messenger RNA biogenesis;K14306	K14306	NUP62,	nuclear pore complex protein Nup62
dark-hl	UPREGULATED	-2.059	0.997	09182 Protein families: genetic information processing;03019 Messenger RNA biogenesis;K14328	K14328	UPF3,	regulator of nonsense transcripts 3
dark-hl	UPREGULATED	-3.088	1	09182 Protein families: genetic information processing;03019 Messenger RNA biogenesis;K14396	K14396	PABPN1,	polyadenylate-binding protein 2
dark-hl	UPREGULATED	-1.888	1	09182 Protein families: genetic information processing;03019 Messenger RNA biogenesis;K14404	K14404	CPSF4,	cleavage and polyadenylation specificity factor subunit 4
dark-hl	UPREGULATED	-1.792	0.985	09182 Protein families: genetic information processing;03019 Messenger RNA biogenesis;K14406	K14406	CSTF1	cleavage stimulation factor subunit 1
dark-hl	UPREGULATED	-3.707	1	09182 Protein families: genetic information processing;03019 Messenger RNA biogenesis;K14411	K14411	MSI	RNA-binding protein Musashi
dark-hl	UPREGULATED	-1.421	0.996	09182 Protein families: genetic information processing;03019 Messenger RNA biogenesis;K14442	K14442	DHX36,	ATP-dependent RNA helicase DHX36 [EC:3.6.4.13]
dark-hl	UPREGULATED	-1.819	1	09182 Protein families: genetic information processing;03019 Messenger RNA biogenesis;K14651	K14651	TAF15,	transcription initiation factor TFIID subunit 15
dark-hl	UPREGULATED	-4.294	1	09182 Protein families: genetic information processing;03019 Messenger RNA biogenesis;K14753	K14753	RACK1	guanine nucleotide-binding protein subunit beta-2-like 1 protein
dark-hl	UPREGULATED	-2.028	1	09182 Protein families: genetic information processing;03019 Messenger RNA biogenesis;K14844	K14844	PUF6	pumilio homology domain family member 6
dark-hl	UPREGULATED	-2.004	0.999	09182 Protein families: genetic information processing;03019 Messenger RNA biogenesis;K15171	K15171	SUPT4H1,	transcription elongation factor SPT4
dark-hl	UPREGULATED	-1.84	0.987	09182 Protein families: genetic information processing;03019 Messenger RNA biogenesis;K18715	K18715	NUP159	nucleoporin NUP159
dark-hl	UPREGULATED	-2.394	0.999	09182 Protein families: genetic information processing;03019 Messenger RNA biogenesis;K18726	K18726	FAF2,	FAS-associated factor 2
dark-hl	UPREGULATED	-1.891	0.991	09182 Protein families: genetic information processing;03019 Messenger RNA biogenesis;K18729	K18729	ANGEL	protein angel
dark-hl	UPREGULATED	-2.003	1	09182 Protein families: genetic information processing;03019 Messenger RNA biogenesis;K18738	K18738	HEK	heterogeneous nuclear rnp K-like protein
dark-hl	UPREGULATED	-2.963	1	09182 Protein families: genetic information processing;03019 Messenger RNA biogenesis;K18739	K18739	BICD	protein bicaudal D
dark-hl	UPREGULATED	-2.251	1	09182 Protein families: genetic information processing;03019 Messenger RNA biogenesis;K18740	K18740	EXD1,	exonuclease 3'-5' domain-containing protein 1
dark-hl	UPREGULATED	-2.613	1	09182 Protein families: genetic information processing;03019 Messenger RNA biogenesis;K18749	K18749	LSM14,	protein LSM14
dark-hl	UPREGULATED	-2.006	1	09182 Protein families: genetic information processing;03019 Messenger RNA biogenesis;K18754	K18754	LIN28	protein lin-28
dark-hl	UPREGULATED	-3.643	1	09182 Protein families: genetic information processing;03019 Messenger RNA biogenesis;K21444	K21444	PCBP3_4	poly(rC)-binding protein 3/4
dark-hl	UPREGULATED	-2.044	0.999	09182 Protein families: genetic information processing;03021 Transcription machinery;K03002	K03002	RPA2,	DNA-directed RNA polymerase I subunit RPA2 [EC:2.7.7.6]
dark-hl	UPREGULATED	-1.446	0.988	09182 Protein families: genetic information processing;03021 Transcription machinery;K03006	K03006	RPB1,	DNA-directed RNA polymerase II subunit RPB1 [EC:2.7.7.6]
dark-hl	UPREGULATED	-4.796	1	09182 Protein families: genetic information processing;03021 Transcription machinery;K03010	K03010	RPB2,	DNA-directed RNA polymerase II subunit RPB2 [EC:2.7.7.6]
dark-hl	UPREGULATED	-1.47	1	09182 Protein families: genetic information processing;03021 Transcription machinery;K03013	K03013	RPABC1,	DNA-directed RNA polymerases I, II, and III subunit RPABC1
dark-hl	UPREGULATED	-2.501	1	09182 Protein families: genetic information processing;03021 Transcription machinery;K03014	K03014	RPABC2,	DNA-directed RNA polymerases I, II, and III subunit RPABC2
dark-hl	UPREGULATED	-3.02	1	09182 Protein families: genetic information processing;03021 Transcription machinery;K03015	K03015	RPB7,	DNA-directed RNA polymerase II subunit RPB7
dark-hl	UPREGULATED	-2.074	1	09182 Protein families: genetic information processing;03021 Transcription machinery;K03016	K03016	RPABC3,	DNA-directed RNA polymerases I, II, and III subunit RPABC3
dark-hl	UPREGULATED	-1.145	0.97	09182 Protein families: genetic information processing;03021 Transcription machinery;K03017	K03017	RPB9,	DNA-directed RNA polymerase II subunit RPB9
dark-hl	UPREGULATED	-1.93	0.987	09182 Protein families: genetic information processing;03021 Transcription machinery;K03019	K03019	RPC11,	DNA-directed RNA polymerase III subunit RPC11
dark-hl	UPREGULATED	-1.84	0.987	09182 Protein families: genetic information processing;03021 Transcription machinery;K03027	K03027	RPAC1,	DNA-directed RNA polymerases I and III subunit RPAC1
dark-hl	UPREGULATED	-1.699	0.996	09182 Protein families: genetic information processing;03021 Transcription machinery;K03086	K03086	rpoD	RNA polymerase primary sigma factor
dark-hl	UPREGULATED	-1.699	0.996	09182 Protein families: genetic information processing;03021 Transcription machinery;K03087	K03087	rpoS	RNA polymerase nonessential primary-like sigma factor
dark-hl	UPREGULATED	-2.809	1	09182 Protein families: genetic information processing;03021 Transcription machinery;K03124	K03124	TFIIB,	transcription initiation factor TFIIB
dark-hl	UPREGULATED	-1.786	0.972	09182 Protein families: genetic information processing;03021 Transcription machinery;K03127	K03127	TAF13	transcription initiation factor TFIID subunit 13
dark-hl	UPREGULATED	-1.948	1	09182 Protein families: genetic information processing;03021 Transcription machinery;K03132	K03132	TAF7	transcription initiation factor TFIID subunit 7
dark-hl	UPREGULATED	-2.765	1	09182 Protein families: genetic information processing;03021 Transcription machinery;K06269	K06269	PPP1C	serine/threonine-protein phosphatase PP1 catalytic subunit [EC:3.1.3.16]
dark-hl	UPREGULATED	-1.379	0.965	09182 Protein families: genetic information processing;03021 Transcription machinery;K11292	K11292	SUPT6H,	transcription elongation factor SPT6
dark-hl	UPREGULATED	-1.952	1	09182 Protein families: genetic information processing;03021 Transcription machinery;K11366	K11366	USP22_27_51,	ubiquitin carboxyl-terminal hydrolase 22/27/51 [EC:3.4.19.12]
dark-hl	UPREGULATED	-2.625	1	09182 Protein families: genetic information processing;03021 Transcription machinery;K11648	K11648	SMARCB1,	SWI/SNF-related matrix-associated actin-dependent regulator of chromatin subfamily B member 1
dark-hl	UPREGULATED	-3.584	1	09182 Protein families: genetic information processing;03021 Transcription machinery;K11649	K11649	SMARCC	SWI/SNF-related matrix-associated actin-dependent regulator of chromatin subfamily C
dark-hl	UPREGULATED	-2.726	1	09182 Protein families: genetic information processing;03021 Transcription machinery;K11654	K11654	SMARCA5,	SWI/SNF-related matrix-associated actin-dependent regulator of chromatin subfamily A member 5 [EC:5.6.2.-]
dark-hl	UPREGULATED	-2.831	1	09182 Protein families: genetic information processing;03021 Transcription machinery;K11768	K11768	ARP9,	actin-related protein 9
dark-hl	UPREGULATED	-1.84	0.987	09182 Protein families: genetic information processing;03021 Transcription machinery;K11786	K11786	STH1_SNF2	ATP-dependent helicase STH1/SNF2 [EC:5.6.2.-]
dark-hl	UPREGULATED	-1.794	0.997	09182 Protein families: genetic information processing;03021 Transcription machinery;K12412	K12412	MCM1	pheromone receptor transcription factor
dark-hl	UPREGULATED	-2.237	0.998	09182 Protein families: genetic information processing;03021 Transcription machinery;K12619	K12619	XRN2,	5'-3' exoribonuclease 2 [EC:3.1.13.-]
dark-hl	UPREGULATED	-2.497	1	09182 Protein families: genetic information processing;03021 Transcription machinery;K12830	K12830	SF3B3,	splicing factor 3B subunit 3
dark-hl	UPREGULATED	-1.888	1	09182 Protein families: genetic information processing;03021 Transcription machinery;K14404	K14404	CPSF4,	cleavage and polyadenylation specificity factor subunit 4
dark-hl	UPREGULATED	-1.819	1	09182 Protein families: genetic information processing;03021 Transcription machinery;K14651	K14651	TAF15,	transcription initiation factor TFIID subunit 15
dark-hl	UPREGULATED	-2.136	0.996	09182 Protein families: genetic information processing;03021 Transcription machinery;K15148	K15148	MED7	mediator of RNA polymerase II transcription subunit 7
dark-hl	UPREGULATED	-2.004	0.999	09182 Protein families: genetic information processing;03021 Transcription machinery;K15171	K15171	SUPT4H1,	transcription elongation factor SPT4
dark-hl	UPREGULATED	-1.598	0.955	09182 Protein families: genetic information processing;03021 Transcription machinery;K15176	K15176	CTR9	RNA polymerase-associated protein CTR9
dark-hl	UPREGULATED	-4.413	1	09182 Protein families: genetic information processing;03021 Transcription machinery;K15203	K15203	GTF3C6	general transcription factor 3C polypeptide 6
dark-hl	UPREGULATED	-1.112	0.995	09182 Protein families: genetic information processing;03021 Transcription machinery;K15731	K15731	CTDSP	carboxy-terminal domain RNA polymerase II polypeptide A small phosphatase [EC:3.1.3.16]
dark-hl	UPREGULATED	-1.69	0.97	09182 Protein families: genetic information processing;03029 Mitochondrial biogenesis;K01410	K01410	MIPEP	mitochondrial intermediate peptidase [EC:3.4.24.59]
dark-hl	UPREGULATED	-1.542	0.996	09182 Protein families: genetic information processing;03029 Mitochondrial biogenesis;K01412	K01412	PMPCA,	mitochondrial-processing peptidase subunit alpha [EC:3.4.24.64]
dark-hl	UPREGULATED	-1.44	1	09182 Protein families: genetic information processing;03029 Mitochondrial biogenesis;K01866	K01866	YARS,	tyrosyl-tRNA synthetase [EC:6.1.1.1]
dark-hl	UPREGULATED	-2.333	1	09182 Protein families: genetic information processing;03029 Mitochondrial biogenesis;K01869	K01869	LARS,	leucyl-tRNA synthetase [EC:6.1.1.4]
dark-hl	UPREGULATED	-3.486	1	09182 Protein families: genetic information processing;03029 Mitochondrial biogenesis;K01876	K01876	DARS2,	aspartyl-tRNA synthetase [EC:6.1.1.12]
dark-hl	UPREGULATED	-2.89	1	09182 Protein families: genetic information processing;03029 Mitochondrial biogenesis;K01887	K01887	RARS,	arginyl-tRNA synthetase [EC:6.1.1.19]
dark-hl	UPREGULATED	-2.432	0.999	09182 Protein families: genetic information processing;03029 Mitochondrial biogenesis;K02355	K02355	fusA,	elongation factor G
dark-hl	UPREGULATED	-2.784	1	09182 Protein families: genetic information processing;03029 Mitochondrial biogenesis;K02357	K02357	tsf,	elongation factor Ts
dark-hl	UPREGULATED	-1.531	0.983	09182 Protein families: genetic information processing;03029 Mitochondrial biogenesis;K02519	K02519	infB,	translation initiation factor IF-2
dark-hl	UPREGULATED	-1.934	1	09182 Protein families: genetic information processing;03029 Mitochondrial biogenesis;K02520	K02520	infC,	translation initiation factor IF-3
dark-hl	UPREGULATED	-1.95	0.994	09182 Protein families: genetic information processing;03029 Mitochondrial biogenesis;K02959	K02959	RP-S16,	small subunit ribosomal protein S16
dark-hl	UPREGULATED	-2.077	1	09182 Protein families: genetic information processing;03029 Mitochondrial biogenesis;K03217	K03217	yidC,	YidC/Oxa1 family membrane protein insertase
dark-hl	UPREGULATED	-2.359	1	09182 Protein families: genetic information processing;03029 Mitochondrial biogenesis;K03283	K03283	HSPA1_6_8	heat shock 70kDa protein 1/6/8
dark-hl	UPREGULATED	-2.71	1	09182 Protein families: genetic information processing;03029 Mitochondrial biogenesis;K03687	K03687	GRPE	molecular chaperone GrpE
dark-hl	UPREGULATED	-2.456	1	09182 Protein families: genetic information processing;03029 Mitochondrial biogenesis;K04043	K04043	dnaK,	molecular chaperone DnaK
dark-hl	UPREGULATED	-1.322	1	09182 Protein families: genetic information processing;03029 Mitochondrial biogenesis;K04077	K04077	groEL,	chaperonin GroEL [EC:5.6.1.7]
dark-hl	UPREGULATED	-3.552	1	09182 Protein families: genetic information processing;03029 Mitochondrial biogenesis;K04078	K04078	groES,	chaperonin GroES
dark-hl	UPREGULATED	-3.844	1	09182 Protein families: genetic information processing;03029 Mitochondrial biogenesis;K04079	K04079	HSP90A,	molecular chaperone HtpG
dark-hl	UPREGULATED	-2.387	0.999	09182 Protein families: genetic information processing;03029 Mitochondrial biogenesis;K07152	K07152	SCO1	protein SCO1
dark-hl	UPREGULATED	-1.702	1	09182 Protein families: genetic information processing;03029 Mitochondrial biogenesis;K08341	K08341	GABARAP,	GABA(A) receptor-associated protein
dark-hl	UPREGULATED	-2.1	0.992	09182 Protein families: genetic information processing;03029 Mitochondrial biogenesis;K08675	K08675	PRSS15,	ATP-dependent Lon protease [EC:3.4.21.53]
dark-hl	UPREGULATED	-3.088	1	09182 Protein families: genetic information processing;03029 Mitochondrial biogenesis;K09201	K09201	YY	transcription factor YY
dark-hl	UPREGULATED	-1.948	1	09182 Protein families: genetic information processing;03029 Mitochondrial biogenesis;K09503	K09503	DNAJA2	DnaJ homolog subfamily A member 2
dark-hl	UPREGULATED	-1.929	1	09182 Protein families: genetic information processing;03029 Mitochondrial biogenesis;K09539	K09539	DNAJC19	DnaJ homolog subfamily C member 19
dark-hl	UPREGULATED	-1.965	0.999	09182 Protein families: genetic information processing;03029 Mitochondrial biogenesis;K09554	K09554	CDC37	cell division cycle protein 37
dark-hl	UPREGULATED	-1.531	0.983	09182 Protein families: genetic information processing;03029 Mitochondrial biogenesis;K10357	K10357	MYO5	myosin V
dark-hl	UPREGULATED	-1.918	0.997	09182 Protein families: genetic information processing;03029 Mitochondrial biogenesis;K11831	K11831	NRF1	nuclear respiratory factor 1
dark-hl	UPREGULATED	-2.006	0.996	09182 Protein families: genetic information processing;03029 Mitochondrial biogenesis;K14998	K14998	SURF1,	surfeit locus 1 family protein
dark-hl	UPREGULATED	-2.459	0.999	09182 Protein families: genetic information processing;03029 Mitochondrial biogenesis;K15113	K15113	SLC25A28_37,	solute carrier family 25 (mitochondrial iron transporter), member 28/37
dark-hl	UPREGULATED	-4.743	1	09182 Protein families: genetic information processing;03029 Mitochondrial biogenesis;K17081	K17081	PHB2	prohibitin 2
dark-hl	UPREGULATED	-1.95	0.994	09182 Protein families: genetic information processing;03029 Mitochondrial biogenesis;K17496	K17496	TIM50	mitochondrial import inner membrane translocase subunit TIM50
dark-hl	UPREGULATED	-2.107	1	09182 Protein families: genetic information processing;03029 Mitochondrial biogenesis;K17732	K17732	PMPCB,	mitochondrial-processing peptidase subunit beta [EC:3.4.24.64]
dark-hl	UPREGULATED	-1.155	0.988	09182 Protein families: genetic information processing;03029 Mitochondrial biogenesis;K17777	K17777	TIM9	mitochondrial import inner membrane translocase subunit TIM9
dark-hl	UPREGULATED	-2.412	1	09182 Protein families: genetic information processing;03029 Mitochondrial biogenesis;K17778	K17778	TIM10	mitochondrial import inner membrane translocase subunit TIM10
dark-hl	UPREGULATED	-1.155	0.988	09182 Protein families: genetic information processing;03029 Mitochondrial biogenesis;K17779	K17779	TIM10B	mitochondrial import inner membrane translocase subunit TIM10B
dark-hl	UPREGULATED	-4.294	1	09182 Protein families: genetic information processing;03029 Mitochondrial biogenesis;K17780	K17780	TIM8	mitochondrial import inner membrane translocase subunit TIM8
dark-hl	UPREGULATED	-2.412	1	09182 Protein families: genetic information processing;03029 Mitochondrial biogenesis;K17781	K17781	TIM13	mitochondrial import inner membrane translocase subunit TIM13
dark-hl	UPREGULATED	-1.792	0.985	09182 Protein families: genetic information processing;03029 Mitochondrial biogenesis;K17792	K17792	TIM54	mitochondrial import inner membrane translocase subunit TIM54
dark-hl	UPREGULATED	-2.412	1	09182 Protein families: genetic information processing;03029 Mitochondrial biogenesis;K17793	K17793	TIM12	mitochondrial import inner membrane translocase subunit TIM12
dark-hl	UPREGULATED	-2.623	1	09182 Protein families: genetic information processing;03029 Mitochondrial biogenesis;K17795	K17795	TIM17	mitochondrial import inner membrane translocase subunit TIM17
dark-hl	UPREGULATED	-2.326	0.998	09182 Protein families: genetic information processing;03029 Mitochondrial biogenesis;K17796	K17796	TIM21	mitochondrial import inner membrane translocase subunit TIM21
dark-hl	UPREGULATED	-3.486	1	09182 Protein families: genetic information processing;03029 Mitochondrial biogenesis;K17804	K17804	TIM44	mitochondrial import inner membrane translocase subunit TIM44
dark-hl	UPREGULATED	-2.393	1	09182 Protein families: genetic information processing;03029 Mitochondrial biogenesis;K17805	K17805	PAM16,	mitochondrial import inner membrane translocase subunit TIM16
dark-hl	UPREGULATED	-2.906	1	09182 Protein families: genetic information processing;03029 Mitochondrial biogenesis;K17973	K17973	NAA25,	N-terminal acetyltransferase B complex non-catalytic subunit
dark-hl	UPREGULATED	-2.242	1	09182 Protein families: genetic information processing;03029 Mitochondrial biogenesis;K18158	K18158	NCA2	nuclear control of ATPase protein 2
dark-hl	UPREGULATED	-1.438	0.991	09182 Protein families: genetic information processing;03029 Mitochondrial biogenesis;K18160	K18160	NDUFAF2	NADH dehydrogenase [ubiquinone] 1 alpha subcomplex assembly factor 2
dark-hl	UPREGULATED	-2.004	0.999	09182 Protein families: genetic information processing;03029 Mitochondrial biogenesis;K18171	K18171	CMC1	COX assembly mitochondrial protein 1
dark-hl	UPREGULATED	-2.36	1	09182 Protein families: genetic information processing;03029 Mitochondrial biogenesis;K18914	K18914	FDXR	adrenodoxin-NADP+ reductase [EC:1.18.1.6]
dark-hl	UPREGULATED	-1.838	0.979	09182 Protein families: genetic information processing;03029 Mitochondrial biogenesis;K19513	K19513	CLEC16A	protein CLEC16A
dark-hl	UPREGULATED	-2.187	0.995	09182 Protein families: genetic information processing;03029 Mitochondrial biogenesis;K21594	K21594	GUF1	translation factor GUF1, mitochondrial [EC:3.6.5.-]
dark-hl	UPREGULATED	-2.151	1	09182 Protein families: genetic information processing;03029 Mitochondrial biogenesis;K22066	K22066	BOLA1	BolA-like protein 1
dark-hl	UPREGULATED	-2.52	0.999	09182 Protein families: genetic information processing;03029 Mitochondrial biogenesis;K22069	K22069	LYRM4	LYR motif-containing protein 4
dark-hl	UPREGULATED	-1.85	1	09182 Protein families: genetic information processing;03029 Mitochondrial biogenesis;K22138	K22138	MPC1	mitochondrial pyruvate carrier 1
dark-hl	UPREGULATED	-1.85	1	09182 Protein families: genetic information processing;03029 Mitochondrial biogenesis;K22139	K22139	MPC2	mitochondrial pyruvate carrier 2
dark-hl	UPREGULATED	-2.718	1	09182 Protein families: genetic information processing;03032 DNA replication proteins;K02214	K02214	CDC7	cell division control protein 7 [EC:2.7.11.1]
dark-hl	UPREGULATED	-1.937	1	09182 Protein families: genetic information processing;03032 DNA replication proteins;K02325	K02325	POLE2	DNA polymerase epsilon subunit 2 [EC:2.7.7.7]
dark-hl	UPREGULATED	-1.93	0.987	09182 Protein families: genetic information processing;03032 DNA replication proteins;K02326	K02326	POLE3	DNA polymerase epsilon subunit 3 [EC:2.7.7.7]
dark-hl	UPREGULATED	-1.619	0.999	09182 Protein families: genetic information processing;03032 DNA replication proteins;K03164	K03164	TOP2	DNA topoisomerase II [EC:5.6.2.2]
dark-hl	UPREGULATED	-1.641	1	09182 Protein families: genetic information processing;03032 DNA replication proteins;K04802	K04802	PCNA	proliferating cell nuclear antigen
dark-hl	UPREGULATED	-3.685	1	09182 Protein families: genetic information processing;03032 DNA replication proteins;K07466	K07466	RFA1,	replication factor A1
dark-hl	UPREGULATED	-2.069	0.991	09182 Protein families: genetic information processing;03032 DNA replication proteins;K10738	K10738	MCM9	DNA helicase MCM9 [EC:5.6.2.4]
dark-hl	UPREGULATED	-1.438	0.991	09182 Protein families: genetic information processing;03032 DNA replication proteins;K10742	K10742	DNA2	DNA replication ATP-dependent helicase/nuclease Dna2 [EC:5.6.2.3 3.1.-.-]
dark-hl	UPREGULATED	-1.891	0.991	09182 Protein families: genetic information processing;03032 DNA replication proteins;K10754	K10754	RFC1	replication factor C subunit 1
dark-hl	UPREGULATED	-1.301	0.964	09182 Protein families: genetic information processing;03032 DNA replication proteins;K10755	K10755	RFC2_4	replication factor C subunit 2/4
dark-hl	UPREGULATED	-1.952	1	09182 Protein families: genetic information processing;03032 DNA replication proteins;K10798	K10798	PARP2_3_4	poly [ADP-ribose] polymerase 2/3/4 [EC:2.4.2.30]
dark-hl	UPREGULATED	-2.33	1	09182 Protein families: genetic information processing;03032 DNA replication proteins;K10900	K10900	WRN,	werner syndrome ATP-dependent helicase [EC:5.6.2.4]
dark-hl	UPREGULATED	-1.85	1	09182 Protein families: genetic information processing;03032 DNA replication proteins;K11086	K11086	SNRPB,	small nuclear ribonucleoprotein B and B'
dark-hl	UPREGULATED	-2.352	1	09182 Protein families: genetic information processing;03032 DNA replication proteins;K11087	K11087	SNRPD1,	small nuclear ribonucleoprotein D1
dark-hl	UPREGULATED	-2.003	1	09182 Protein families: genetic information processing;03032 DNA replication proteins;K11088	K11088	SNRPD3,	small nuclear ribonucleoprotein D3
dark-hl	UPREGULATED	-2.49	1	09182 Protein families: genetic information processing;03032 DNA replication proteins;K11096	K11096	SNRPD2,	small nuclear ribonucleoprotein D2
dark-hl	UPREGULATED	-2.006	1	09182 Protein families: genetic information processing;03032 DNA replication proteins;K11097	K11097	SNRPE,	small nuclear ribonucleoprotein E
dark-hl	UPREGULATED	-2.39	1	09182 Protein families: genetic information processing;03032 DNA replication proteins;K11098	K11098	SNRPF,	small nuclear ribonucleoprotein F
dark-hl	UPREGULATED	-2.984	1	09182 Protein families: genetic information processing;03032 DNA replication proteins;K11099	K11099	SNRPG,	small nuclear ribonucleoprotein G
dark-hl	UPREGULATED	-2.814	1	09182 Protein families: genetic information processing;03032 DNA replication proteins;K11128	K11128	GAR1,	H/ACA ribonucleoprotein complex subunit 1
dark-hl	UPREGULATED	-3.549	1	09182 Protein families: genetic information processing;03032 DNA replication proteins;K11129	K11129	NHP2,	H/ACA ribonucleoprotein complex subunit 2
dark-hl	UPREGULATED	-4.765	1	09182 Protein families: genetic information processing;03032 DNA replication proteins;K11130	K11130	NOP10,	H/ACA ribonucleoprotein complex subunit 3
dark-hl	UPREGULATED	-2.799	1	09182 Protein families: genetic information processing;03032 DNA replication proteins;K11131	K11131	DKC1,	H/ACA ribonucleoprotein complex subunit 4 [EC:5.4.99.-]
dark-hl	UPREGULATED	-1.752	0.995	09182 Protein families: genetic information processing;03036 Chromosome and associated proteins;K01623	K01623	ALDO	fructose-bisphosphate aldolase, class I [EC:4.1.2.13]
dark-hl	UPREGULATED	-1.794	0.997	09182 Protein families: genetic information processing;03036 Chromosome and associated proteins;K02156	K02156	AUB,	aubergine
dark-hl	UPREGULATED	-3.105	1	09182 Protein families: genetic information processing;03036 Chromosome and associated proteins;K02183	K02183	CALM	calmodulin
dark-hl	UPREGULATED	-1.93	0.987	09182 Protein families: genetic information processing;03036 Chromosome and associated proteins;K02326	K02326	POLE3	DNA polymerase epsilon subunit 3 [EC:2.7.7.7]
dark-hl	UPREGULATED	-2.838	1	09182 Protein families: genetic information processing;03036 Chromosome and associated proteins;K02331	K02331	POL5,	DNA polymerase phi [EC:2.7.7.7]
dark-hl	UPREGULATED	-2.579	0.999	09182 Protein families: genetic information processing;03036 Chromosome and associated proteins;K02516	K02516	PRMT5,	type II protein arginine methyltransferase [EC:2.1.1.320]
dark-hl	UPREGULATED	-2.906	1	09182 Protein families: genetic information processing;03036 Chromosome and associated proteins;K03115	K03115	CSNK2B	casein kinase II subunit beta
dark-hl	UPREGULATED	-1.948	1	09182 Protein families: genetic information processing;03036 Chromosome and associated proteins;K03132	K03132	TAF7	transcription initiation factor TFIID subunit 7
dark-hl	UPREGULATED	-1.619	0.999	09182 Protein families: genetic information processing;03036 Chromosome and associated proteins;K03164	K03164	TOP2	DNA topoisomerase II [EC:5.6.2.2]
dark-hl	UPREGULATED	-2.459	0.999	09182 Protein families: genetic information processing;03036 Chromosome and associated proteins;K03354	K03354	APC7,	anaphase-promoting complex subunit 7
dark-hl	UPREGULATED	-2.939	1	09182 Protein families: genetic information processing;03036 Chromosome and associated proteins;K05931	K05931	CARM1,	type I protein arginine methyltransferase [EC:2.1.1.319]
dark-hl	UPREGULATED	-1.66	0.979	09182 Protein families: genetic information processing;03036 Chromosome and associated proteins;K06065	K06065	NCOR2,	nuclear receptor co-repressor 2
dark-hl	UPREGULATED	-1.272	0.983	09182 Protein families: genetic information processing;03036 Chromosome and associated proteins;K06067	K06067	HDAC1_2	histone deacetylase 1/2 [EC:3.5.1.98]
dark-hl	UPREGULATED	-2.559	1	09182 Protein families: genetic information processing;03036 Chromosome and associated proteins;K06674	K06674	SMC2	structural maintenance of chromosome 2
dark-hl	UPREGULATED	-2.408	1	09182 Protein families: genetic information processing;03036 Chromosome and associated proteins;K07374	K07374	TUBA	tubulin alpha
dark-hl	UPREGULATED	-2.242	1	09182 Protein families: genetic information processing;03036 Chromosome and associated proteins;K07901	K07901	RAB8A,	Ras-related protein Rab-8A
dark-hl	UPREGULATED	-1.511	1	09182 Protein families: genetic information processing;03036 Chromosome and associated proteins;K07936	K07936	RAN	GTP-binding nuclear protein Ran
dark-hl	UPREGULATED	-2.474	0.999	09182 Protein families: genetic information processing;03036 Chromosome and associated proteins;K09142	K09142	SPOUT1	methyltransferase [EC:2.1.1.-]
dark-hl	UPREGULATED	-3.162	1	09182 Protein families: genetic information processing;03036 Chromosome and associated proteins;K09189	K09189	MLL5	[histone H3]-lysine4 N-trimethyltransferase MLL5 [EC:2.1.1.354]
dark-hl	UPREGULATED	-3.088	1	09182 Protein families: genetic information processing;03036 Chromosome and associated proteins;K09201	K09201	YY	transcription factor YY
dark-hl	UPREGULATED	-1.939	1	09182 Protein families: genetic information processing;03036 Chromosome and associated proteins;K10683	K10683	BARD1	BRCA1-associated RING domain protein 1
dark-hl	UPREGULATED	-1.301	0.964	09182 Protein families: genetic information processing;03036 Chromosome and associated proteins;K10755	K10755	RFC2_4	replication factor C subunit 2/4
dark-hl	UPREGULATED	-1.952	1	09182 Protein families: genetic information processing;03036 Chromosome and associated proteins;K10798	K10798	PARP2_3_4	poly [ADP-ribose] polymerase 2/3/4 [EC:2.4.2.30]
dark-hl	UPREGULATED	-2.333	1	09182 Protein families: genetic information processing;03036 Chromosome and associated proteins;K11269	K11269	CTF18,	chromosome transmission fidelity protein 18
dark-hl	UPREGULATED	-2.205	0.997	09182 Protein families: genetic information processing;03036 Chromosome and associated proteins;K11279	K11279	NAP1L1,	nucleosome assembly protein 1-like 1
dark-hl	UPREGULATED	-4.45	1	09182 Protein families: genetic information processing;03036 Chromosome and associated proteins;K11282	K11282	NAP1L4,	nucleosome assembly protein 1-like 4
dark-hl	UPREGULATED	-4.45	1	09182 Protein families: genetic information processing;03036 Chromosome and associated proteins;K11290	K11290	SET,	template-activating factor I
dark-hl	UPREGULATED	-1.379	0.965	09182 Protein families: genetic information processing;03036 Chromosome and associated proteins;K11292	K11292	SUPT6H,	transcription elongation factor SPT6
dark-hl	UPREGULATED	-3.944	1	09182 Protein families: genetic information processing;03036 Chromosome and associated proteins;K11294	K11294	NCL,	nucleolin
dark-hl	UPREGULATED	-2.459	0.999	09182 Protein families: genetic information processing;03036 Chromosome and associated proteins;K11349	K11349	BRD1,	bromodomain-containing protein 1
dark-hl	UPREGULATED	-1.952	1	09182 Protein families: genetic information processing;03036 Chromosome and associated proteins;K11366	K11366	USP22_27_51,	ubiquitin carboxyl-terminal hydrolase 22/27/51 [EC:3.4.19.12]
dark-hl	UPREGULATED	-1.272	0.983	09182 Protein families: genetic information processing;03036 Chromosome and associated proteins;K11404	K11404	HDAC3	histone deacetylase 3 [EC:3.5.1.98]
dark-hl	UPREGULATED	-1.915	1	09182 Protein families: genetic information processing;03036 Chromosome and associated proteins;K11419	K11419	SUV39H,	[histone H3]-lysine9 N-trimethyltransferase SUV39H [EC:2.1.1.355]
dark-hl	UPREGULATED	-1.272	0.983	09182 Protein families: genetic information processing;03036 Chromosome and associated proteins;K11483	K11483	HOS2	histone deacetylase HOS2 [EC:3.5.1.98]
dark-hl	UPREGULATED	-3.786	1	09182 Protein families: genetic information processing;03036 Chromosome and associated proteins;K11493	K11493	RCC1	regulator of chromosome condensation
dark-hl	UPREGULATED	-2.499	1	09182 Protein families: genetic information processing;03036 Chromosome and associated proteins;K11507	K11507	CENPO	centromere protein O
dark-hl	UPREGULATED	-1.459	0.995	09182 Protein families: genetic information processing;03036 Chromosome and associated proteins;K11511	K11511	APITD1,	centromere protein S
dark-hl	UPREGULATED	-1.885	0.989	09182 Protein families: genetic information processing;03036 Chromosome and associated proteins;K11585	K11585	CBX1,	chromobox protein 1
dark-hl	UPREGULATED	-1.885	0.989	09182 Protein families: genetic information processing;03036 Chromosome and associated proteins;K11586	K11586	CBX3,	chromobox protein 3
dark-hl	UPREGULATED	-1.885	0.989	09182 Protein families: genetic information processing;03036 Chromosome and associated proteins;K11587	K11587	CBX5,	chromobox protein 5
dark-hl	UPREGULATED	-2.625	1	09182 Protein families: genetic information processing;03036 Chromosome and associated proteins;K11648	K11648	SMARCB1,	SWI/SNF-related matrix-associated actin-dependent regulator of chromatin subfamily B member 1
dark-hl	UPREGULATED	-3.584	1	09182 Protein families: genetic information processing;03036 Chromosome and associated proteins;K11649	K11649	SMARCC	SWI/SNF-related matrix-associated actin-dependent regulator of chromatin subfamily C
dark-hl	UPREGULATED	-2.726	1	09182 Protein families: genetic information processing;03036 Chromosome and associated proteins;K11654	K11654	SMARCA5,	SWI/SNF-related matrix-associated actin-dependent regulator of chromatin subfamily A member 5 [EC:5.6.2.-]
dark-hl	UPREGULATED	-2.831	1	09182 Protein families: genetic information processing;03036 Chromosome and associated proteins;K11768	K11768	ARP9,	actin-related protein 9
dark-hl	UPREGULATED	-1.84	0.987	09182 Protein families: genetic information processing;03036 Chromosome and associated proteins;K11786	K11786	STH1_SNF2	ATP-dependent helicase STH1/SNF2 [EC:5.6.2.-]
dark-hl	UPREGULATED	-1.191	0.962	09182 Protein families: genetic information processing;03036 Chromosome and associated proteins;K12828	K12828	SF3B1,	splicing factor 3B subunit 1
dark-hl	UPREGULATED	-2.497	1	09182 Protein families: genetic information processing;03036 Chromosome and associated proteins;K12830	K12830	SF3B3,	splicing factor 3B subunit 3
dark-hl	UPREGULATED	-3.878	1	09182 Protein families: genetic information processing;03036 Chromosome and associated proteins;K12869	K12869	CRN,	crooked neck
dark-hl	UPREGULATED	-1.84	0.987	09182 Protein families: genetic information processing;03036 Chromosome and associated proteins;K13196	K13196	DPF2,	zinc finger protein ubi-d4
dark-hl	UPREGULATED	-2.411	1	09182 Protein families: genetic information processing;03036 Chromosome and associated proteins;K14293	K14293	KPNB1,	importin subunit beta-1
dark-hl	UPREGULATED	-2.579	0.999	09182 Protein families: genetic information processing;03036 Chromosome and associated proteins;K14298	K14298	RAE1,	mRNA export factor
dark-hl	UPREGULATED	-1.578	1	09182 Protein families: genetic information processing;03036 Chromosome and associated proteins;K15042	K15042	KPNA5_6	importin subunit alpha-6/7
dark-hl	UPREGULATED	-1.578	1	09182 Protein families: genetic information processing;03036 Chromosome and associated proteins;K15043	K15043	KPNA2_7	importin subunit alpha-1/8
dark-hl	UPREGULATED	-1.484	0.974	09182 Protein families: genetic information processing;03036 Chromosome and associated proteins;K16911	K16911	DDX21	ATP-dependent RNA helicase DDX21 [EC:3.6.4.13]
dark-hl	UPREGULATED	-1.773	0.996	09182 Protein families: genetic information processing;03036 Chromosome and associated proteins;K16914	K16914	RIOX1,	protein-L-histidine (3S)-3-hydroxylase / [histone H3]-trimethyl-L-lysine4/36 demethylase [EC:1.14.11.79 1.14.11.67 1.14.11.69]
dark-hl	UPREGULATED	-3.645	1	09182 Protein families: genetic information processing;03036 Chromosome and associated proteins;K18405	K18405	TDRD1_4_6_7	tudor domain-containing protein 1/4/6/7
dark-hl	UPREGULATED	-4.429	1	09182 Protein families: genetic information processing;03036 Chromosome and associated proteins;K18408	K18408	TDRD9	ATP-dependent RNA helicase TDRD9 [EC:3.6.4.13]
dark-hl	UPREGULATED	-1.831	1	09182 Protein families: genetic information processing;03036 Chromosome and associated proteins;K19001	K19001	HELLS,	ATP-dependent DNA helicase
dark-hl	UPREGULATED	-2.379	1	09182 Protein families: genetic information processing;03036 Chromosome and associated proteins;K19347	K19347	SUN1_2	SUN domain-containing protein 1/2
dark-hl	UPREGULATED	-1.918	0.997	09182 Protein families: genetic information processing;03036 Chromosome and associated proteins;K19788	K19788	OLA1	obg-like ATPase 1
dark-hl	UPREGULATED	-2.275	1	09182 Protein families: genetic information processing;03036 Chromosome and associated proteins;K20791	K20791	NAA10_11,	N-alpha-acetyltransferase 10/11 [EC:2.3.1.255]
dark-hl	UPREGULATED	-2.069	0.991	09182 Protein families: genetic information processing;03036 Chromosome and associated proteins;K20792	K20792	NAA15_16	N-alpha-acetyltransferase 15/16, NatA auxiliary subunit
dark-hl	UPREGULATED	-2.579	0.999	09182 Protein families: genetic information processing;03041 Spliceosome;K02516	K02516	PRMT5,	type II protein arginine methyltransferase [EC:2.1.1.320]
dark-hl	UPREGULATED	-2.359	1	09182 Protein families: genetic information processing;03041 Spliceosome;K03283	K03283	HSPA1_6_8	heat shock 70kDa protein 1/6/8
dark-hl	UPREGULATED	-3.645	1	09182 Protein families: genetic information processing;03041 Spliceosome;K05019	K05019	CLNS1A	chloride channel, nucleotide-sensitive, 1A
dark-hl	UPREGULATED	-1.317	0.993	09182 Protein families: genetic information processing;03041 Spliceosome;K06063	K06063	SNW1,	SNW domain-containing protein 1
dark-hl	UPREGULATED	-2.765	1	09182 Protein families: genetic information processing;03041 Spliceosome;K06269	K06269	PPP1C	serine/threonine-protein phosphatase PP1 catalytic subunit [EC:3.1.3.16]
dark-hl	UPREGULATED	-1.287	0.978	09182 Protein families: genetic information processing;03041 Spliceosome;K08818	K08818	CDC2L	cell division cycle 2-like [EC:2.7.11.22]
dark-hl	UPREGULATED	-1.358	0.976	09182 Protein families: genetic information processing;03041 Spliceosome;K08827	K08827	PRPF4B	serine/threonine-protein kinase PRP4 [EC:2.7.11.1]
dark-hl	UPREGULATED	-1.947	0.999	09182 Protein families: genetic information processing;03041 Spliceosome;K09566	K09566	PPIG	peptidyl-prolyl isomerase G (cyclophilin G) [EC:5.2.1.8]
dark-hl	UPREGULATED	-3.98	1	09182 Protein families: genetic information processing;03041 Spliceosome;K10599	K10599	PRPF19,	pre-mRNA-processing factor 19 [EC:2.3.2.27]
dark-hl	UPREGULATED	-1.85	1	09182 Protein families: genetic information processing;03041 Spliceosome;K11086	K11086	SNRPB,	small nuclear ribonucleoprotein B and B'
dark-hl	UPREGULATED	-2.352	1	09182 Protein families: genetic information processing;03041 Spliceosome;K11087	K11087	SNRPD1,	small nuclear ribonucleoprotein D1
dark-hl	UPREGULATED	-2.003	1	09182 Protein families: genetic information processing;03041 Spliceosome;K11088	K11088	SNRPD3,	small nuclear ribonucleoprotein D3
dark-hl	UPREGULATED	-1.812	1	09182 Protein families: genetic information processing;03041 Spliceosome;K11091	K11091	SNRPA	U1 small nuclear ribonucleoprotein A
dark-hl	UPREGULATED	-2.128	1	09182 Protein families: genetic information processing;03041 Spliceosome;K11092	K11092	SNRPA1	U2 small nuclear ribonucleoprotein A'
dark-hl	UPREGULATED	-1.812	1	09182 Protein families: genetic information processing;03041 Spliceosome;K11094	K11094	SNRPB2	U2 small nuclear ribonucleoprotein B''
dark-hl	UPREGULATED	-2.49	1	09182 Protein families: genetic information processing;03041 Spliceosome;K11096	K11096	SNRPD2,	small nuclear ribonucleoprotein D2
dark-hl	UPREGULATED	-2.006	1	09182 Protein families: genetic information processing;03041 Spliceosome;K11097	K11097	SNRPE,	small nuclear ribonucleoprotein E
dark-hl	UPREGULATED	-2.39	1	09182 Protein families: genetic information processing;03041 Spliceosome;K11098	K11098	SNRPF,	small nuclear ribonucleoprotein F
dark-hl	UPREGULATED	-2.984	1	09182 Protein families: genetic information processing;03041 Spliceosome;K11099	K11099	SNRPG,	small nuclear ribonucleoprotein G
dark-hl	UPREGULATED	-1.885	0.989	09182 Protein families: genetic information processing;03041 Spliceosome;K11586	K11586	CBX3,	chromobox protein 3
dark-hl	UPREGULATED	-2.006	0.996	09182 Protein families: genetic information processing;03041 Spliceosome;K12621	K12621	LSM2	U6 snRNA-associated Sm-like protein LSm2
dark-hl	UPREGULATED	-2.69	1	09182 Protein families: genetic information processing;03041 Spliceosome;K12734	K12734	PPIL3	peptidyl-prolyl cis-trans isomerase-like 3 [EC:5.2.1.8]
dark-hl	UPREGULATED	-3.707	1	09182 Protein families: genetic information processing;03041 Spliceosome;K12741	K12741	HNRNPA1_3	heterogeneous nuclear ribonucleoprotein A1/A3
dark-hl	UPREGULATED	-2.069	0.991	09182 Protein families: genetic information processing;03041 Spliceosome;K12817	K12817	PRPF18,	pre-mRNA-splicing factor 18
dark-hl	UPREGULATED	-2.184	1	09182 Protein families: genetic information processing;03041 Spliceosome;K12820	K12820	DHX15,	pre-mRNA-splicing factor ATP-dependent RNA helicase DHX15/PRP43 [EC:3.6.4.13]
dark-hl	UPREGULATED	-1.06	0.999	09182 Protein families: genetic information processing;03041 Spliceosome;K12823	K12823	DDX5,	ATP-dependent RNA helicase DDX5/DBP2 [EC:3.6.4.13]
dark-hl	UPREGULATED	-2.885	1	09182 Protein families: genetic information processing;03041 Spliceosome;K12824	K12824	TCERG1,	transcription elongation regulator 1
dark-hl	UPREGULATED	-1.965	0.999	09182 Protein families: genetic information processing;03041 Spliceosome;K12825	K12825	SF3A1,	splicing factor 3A subunit 1
dark-hl	UPREGULATED	-2.69	1	09182 Protein families: genetic information processing;03041 Spliceosome;K12827	K12827	SF3A3,	splicing factor 3A subunit 3
dark-hl	UPREGULATED	-1.191	0.962	09182 Protein families: genetic information processing;03041 Spliceosome;K12828	K12828	SF3B1,	splicing factor 3B subunit 1
dark-hl	UPREGULATED	-2.497	1	09182 Protein families: genetic information processing;03041 Spliceosome;K12830	K12830	SF3B3,	splicing factor 3B subunit 3
dark-hl	UPREGULATED	-2.179	0.997	09182 Protein families: genetic information processing;03041 Spliceosome;K12831	K12831	SF3B4,	splicing factor 3B subunit 4
dark-hl	UPREGULATED	-2.155	1	09182 Protein families: genetic information processing;03041 Spliceosome;K12833	K12833	SF3B14	pre-mRNA branch site protein p14
dark-hl	UPREGULATED	-2.017	0.99	09182 Protein families: genetic information processing;03041 Spliceosome;K12834	K12834	PHF5A	PHD finger-like domain-containing protein 5A
dark-hl	UPREGULATED	-1.701	1	09182 Protein families: genetic information processing;03041 Spliceosome;K12837	K12837	U2AF2	splicing factor U2AF 65 kDa subunit
dark-hl	UPREGULATED	-1.614	1	09182 Protein families: genetic information processing;03041 Spliceosome;K12839	K12839	SMNDC1,	survival of motor neuron-related-splicing factor 30
dark-hl	UPREGULATED	-2.387	0.999	09182 Protein families: genetic information processing;03041 Spliceosome;K12843	K12843	PRPF3,	U4/U6 small nuclear ribonucleoprotein PRP3
dark-hl	UPREGULATED	-2.094	1	09182 Protein families: genetic information processing;03041 Spliceosome;K12844	K12844	PRPF31	U4/U6 small nuclear ribonucleoprotein PRP31
dark-hl	UPREGULATED	-1.888	1	09182 Protein families: genetic information processing;03041 Spliceosome;K12845	K12845	SNU13,	U4/U6 small nuclear ribonucleoprotein SNU13
dark-hl	UPREGULATED	-1.696	1	09182 Protein families: genetic information processing;03041 Spliceosome;K12847	K12847	USP39,	U4/U6.U5 tri-snRNP-associated protein 2
dark-hl	UPREGULATED	-1.263	0.967	09182 Protein families: genetic information processing;03041 Spliceosome;K12849	K12849	PRPF38A	pre-mRNA-splicing factor 38A
dark-hl	UPREGULATED	-1.263	0.967	09182 Protein families: genetic information processing;03041 Spliceosome;K12851	K12851	PRP38	pre-mRNA-splicing factor 38
dark-hl	UPREGULATED	-1.605	0.995	09182 Protein families: genetic information processing;03041 Spliceosome;K12852	K12852	EFTUD2	116 kDa U5 small nuclear ribonucleoprotein component
dark-hl	UPREGULATED	-1.239	0.988	09182 Protein families: genetic information processing;03041 Spliceosome;K12854	K12854	SNRNP200,	pre-mRNA-splicing helicase BRR2 [EC:3.6.4.13]
dark-hl	UPREGULATED	-2.545	1	09182 Protein families: genetic information processing;03041 Spliceosome;K12857	K12857	SNRNP40,	Prp8 binding protein
dark-hl	UPREGULATED	-3.196	1	09182 Protein families: genetic information processing;03041 Spliceosome;K12860	K12860	CDC5L,	pre-mRNA-splicing factor CDC5/CEF1
dark-hl	UPREGULATED	-3.779	1	09182 Protein families: genetic information processing;03041 Spliceosome;K12861	K12861	BCAS2	pre-mRNA-splicing factor SPF27
dark-hl	UPREGULATED	-2.549	1	09182 Protein families: genetic information processing;03041 Spliceosome;K12867	K12867	SYF1,	pre-mRNA-splicing factor SYF1
dark-hl	UPREGULATED	-1.947	0.999	09182 Protein families: genetic information processing;03041 Spliceosome;K12868	K12868	SYF2	pre-mRNA-splicing factor SYF2
dark-hl	UPREGULATED	-3.878	1	09182 Protein families: genetic information processing;03041 Spliceosome;K12869	K12869	CRN,	crooked neck
dark-hl	UPREGULATED	-1.835	1	09182 Protein families: genetic information processing;03041 Spliceosome;K12871	K12871	CCDC12	coiled-coil domain-containing protein 12
dark-hl	UPREGULATED	-1.663	1	09182 Protein families: genetic information processing;03041 Spliceosome;K12873	K12873	BUD31,	bud site selection protein 31
dark-hl	UPREGULATED	-2.615	1	09182 Protein families: genetic information processing;03041 Spliceosome;K12876	K12876	RBM8A,	RNA-binding protein 8A
dark-hl	UPREGULATED	-1.773	0.998	09182 Protein families: genetic information processing;03041 Spliceosome;K12877	K12877	MAGOH	protein mago nashi
dark-hl	UPREGULATED	-2.69	1	09182 Protein families: genetic information processing;03041 Spliceosome;K12882	K12882	NCBP1,	nuclear cap-binding protein subunit 1
dark-hl	UPREGULATED	-2.459	0.999	09182 Protein families: genetic information processing;03041 Spliceosome;K12883	K12883	NCBP2,	nuclear cap-binding protein subunit 2
dark-hl	UPREGULATED	-3.921	1	09182 Protein families: genetic information processing;03041 Spliceosome;K12889	K12889	PCBP1	poly(rC)-binding protein 1
dark-hl	UPREGULATED	-1.24	0.994	09182 Protein families: genetic information processing;03041 Spliceosome;K12892	K12892	SRSF3,	serine/arginine-rich splicing factor 3
dark-hl	UPREGULATED	-1.24	0.994	09182 Protein families: genetic information processing;03041 Spliceosome;K12896	K12896	SRSF7,	serine/arginine-rich splicing factor 7
dark-hl	UPREGULATED	-2.611	1	09182 Protein families: genetic information processing;03041 Spliceosome;K13025	K13025	EIF4A3,	ATP-dependent RNA helicase [EC:3.6.4.13]
dark-hl	UPREGULATED	-2.568	1	09182 Protein families: genetic information processing;03041 Spliceosome;K13091	K13091	RBM23_39	RNA-binding protein 23/39
dark-hl	UPREGULATED	-1.66	0.979	09182 Protein families: genetic information processing;03041 Spliceosome;K13095	K13095	SF1	splicing factor 1
dark-hl	UPREGULATED	-3.534	1	09182 Protein families: genetic information processing;03041 Spliceosome;K13100	K13100	CWC22	pre-mRNA-splicing factor CWC22
dark-hl	UPREGULATED	-2.811	1	09182 Protein families: genetic information processing;03041 Spliceosome;K13104	K13104	ZNF830,	zinc finger protein 830
dark-hl	UPREGULATED	-2.13	0.994	09182 Protein families: genetic information processing;03041 Spliceosome;K13108	K13108	SNIP1	smad nuclear-interacting protein 1
dark-hl	UPREGULATED	-1.739	0.969	09182 Protein families: genetic information processing;03041 Spliceosome;K13116	K13116	DDX41,	ATP-dependent RNA helicase DDX41 [EC:3.6.4.13]
dark-hl	UPREGULATED	-1.739	0.969	09182 Protein families: genetic information processing;03041 Spliceosome;K13126	K13126	PABPC	polyadenylate-binding protein
dark-hl	UPREGULATED	-2.482	1	09182 Protein families: genetic information processing;03041 Spliceosome;K13141	K13141	INTS4	integrator complex subunit 4
dark-hl	UPREGULATED	-3.921	1	09182 Protein families: genetic information processing;03041 Spliceosome;K13162	K13162	PCBP2	poly(rC)-binding protein 2
dark-hl	UPREGULATED	-1.838	0.979	09182 Protein families: genetic information processing;03041 Spliceosome;K13172	K13172	SRRM2,	serine/arginine repetitive matrix protein 2
dark-hl	UPREGULATED	-1.743	0.974	09182 Protein families: genetic information processing;03041 Spliceosome;K13174	K13174	THOC5	THO complex subunit 5
dark-hl	UPREGULATED	-1.979	0.99	09182 Protein families: genetic information processing;03041 Spliceosome;K13176	K13176	THOC7	THO complex subunit 7
dark-hl	UPREGULATED	-2.33	1	09182 Protein families: genetic information processing;03041 Spliceosome;K13179	K13179	DDX18,	ATP-dependent RNA helicase DDX18/HAS1 [EC:3.6.4.13]
dark-hl	UPREGULATED	-1.484	0.974	09182 Protein families: genetic information processing;03041 Spliceosome;K13183	K13183	DDX50	ATP-dependent RNA helicase DDX50 [EC:3.6.4.13]
dark-hl	UPREGULATED	-2.852	1	09182 Protein families: genetic information processing;03041 Spliceosome;K13190	K13190	RBM15	RNA-binding protein 15
dark-hl	UPREGULATED	-1.84	0.987	09182 Protein families: genetic information processing;03041 Spliceosome;K13196	K13196	DPF2,	zinc finger protein ubi-d4
dark-hl	UPREGULATED	-1.84	0.987	09182 Protein families: genetic information processing;03041 Spliceosome;K13205	K13205	AAR2,	A1 cistron-splicing factor AAR2
dark-hl	UPREGULATED	-3.165	1	09182 Protein families: genetic information processing;03041 Spliceosome;K13207	K13207	CUGBP,	CUG-BP- and ETR3-like factor
dark-hl	UPREGULATED	-1.66	0.979	09182 Protein families: genetic information processing;03041 Spliceosome;K13210	K13210	FUBP	far upstream element-binding protein
dark-hl	UPREGULATED	-1.84	0.987	09182 Protein families: genetic information processing;03041 Spliceosome;K13216	K13216	PPP1R8,	nuclear inhibitor of protein phosphatase 1 [EC:3.1.4.-]
dark-hl	UPREGULATED	-2.254	0.997	09182 Protein families: genetic information processing;03041 Spliceosome;K13221	K13221	WDR77,	methylosome protein 50
dark-hl	UPREGULATED	-1.66	0.979	09182 Protein families: genetic information processing;03041 Spliceosome;K14292	K14292	TGS1	trimethylguanosine synthase [EC:2.1.1.-]
dark-hl	UPREGULATED	-2.559	1	09182 Protein families: genetic information processing;03041 Spliceosome;K20099	K20099	YTHDC2	ATP-dependent RNA helicase YTHDC2 [EC:3.6.4.13]
dark-hl	UPREGULATED	-2.482	1	09182 Protein families: genetic information processing;03051 Proteasome;K02725	K02725	PSMA1	20S proteasome subunit alpha 6 [EC:3.4.25.1]
dark-hl	UPREGULATED	-3.293	1	09182 Protein families: genetic information processing;03051 Proteasome;K02726	K02726	PSMA2	20S proteasome subunit alpha 2 [EC:3.4.25.1]
dark-hl	UPREGULATED	-1.655	1	09182 Protein families: genetic information processing;03051 Proteasome;K02727	K02727	PSMA3	20S proteasome subunit alpha 7 [EC:3.4.25.1]
dark-hl	UPREGULATED	-2.797	1	09182 Protein families: genetic information processing;03051 Proteasome;K02728	K02728	PSMA4	20S proteasome subunit alpha 3 [EC:3.4.25.1]
dark-hl	UPREGULATED	-2.451	1	09182 Protein families: genetic information processing;03051 Proteasome;K02729	K02729	PSMA5	20S proteasome subunit alpha 5 [EC:3.4.25.1]
dark-hl	UPREGULATED	-2.138	1	09182 Protein families: genetic information processing;03051 Proteasome;K02730	K02730	PSMA6	20S proteasome subunit alpha 1 [EC:3.4.25.1]
dark-hl	UPREGULATED	-1.219	0.993	09182 Protein families: genetic information processing;03051 Proteasome;K02732	K02732	PSMB1	20S proteasome subunit beta 6 [EC:3.4.25.1]
dark-hl	UPREGULATED	-1.862	1	09182 Protein families: genetic information processing;03051 Proteasome;K02733	K02733	PSMB10,	20S proteasome subunit beta 10 [EC:3.4.25.1]
dark-hl	UPREGULATED	-1.696	1	09182 Protein families: genetic information processing;03051 Proteasome;K02734	K02734	PSMB2	20S proteasome subunit beta 4 [EC:3.4.25.1]
dark-hl	UPREGULATED	-2.559	1	09182 Protein families: genetic information processing;03051 Proteasome;K02735	K02735	PSMB3	20S proteasome subunit beta 3 [EC:3.4.25.1]
dark-hl	UPREGULATED	-2.251	1	09182 Protein families: genetic information processing;03051 Proteasome;K02736	K02736	PSMB4	20S proteasome subunit beta 7 [EC:3.4.25.1]
dark-hl	UPREGULATED	-1.895	1	09182 Protein families: genetic information processing;03051 Proteasome;K02737	K02737	PSMB5	20S proteasome subunit beta 5 [EC:3.4.25.1]
dark-hl	UPREGULATED	-2.499	1	09182 Protein families: genetic information processing;03051 Proteasome;K02738	K02738	PSMB6	20S proteasome subunit beta 1 [EC:3.4.25.1]
dark-hl	UPREGULATED	-1.862	1	09182 Protein families: genetic information processing;03051 Proteasome;K02739	K02739	PSMB7	20S proteasome subunit beta 2 [EC:3.4.25.1]
dark-hl	UPREGULATED	-1.895	1	09182 Protein families: genetic information processing;03051 Proteasome;K02740	K02740	PSMB8,	20S proteasome subunit beta 8 [EC:3.4.25.1]
dark-hl	UPREGULATED	-2.235	1	09182 Protein families: genetic information processing;03051 Proteasome;K03028	K03028	PSMD2,	26S proteasome regulatory subunit N1
dark-hl	UPREGULATED	-1.975	1	09182 Protein families: genetic information processing;03051 Proteasome;K03030	K03030	PSMD14,	26S proteasome regulatory subunit N11
dark-hl	UPREGULATED	-1.445	0.994	09182 Protein families: genetic information processing;03051 Proteasome;K03031	K03031	PSMD8,	26S proteasome regulatory subunit N12
dark-hl	UPREGULATED	-2.939	1	09182 Protein families: genetic information processing;03051 Proteasome;K03032	K03032	PSMD1,	26S proteasome regulatory subunit N2
dark-hl	UPREGULATED	-2.615	1	09182 Protein families: genetic information processing;03051 Proteasome;K03037	K03037	PSMD6,	26S proteasome regulatory subunit N7
dark-hl	UPREGULATED	-3.014	1	09182 Protein families: genetic information processing;03051 Proteasome;K03038	K03038	PSMD7,	26S proteasome regulatory subunit N8
dark-hl	UPREGULATED	-1.061	0.991	09182 Protein families: genetic information processing;03051 Proteasome;K03061	K03061	PSMC2,	26S proteasome regulatory subunit T1
dark-hl	UPREGULATED	-1.84	0.987	09182 Protein families: genetic information processing;03051 Proteasome;K03062	K03062	PSMC1,	26S proteasome regulatory subunit T2
dark-hl	UPREGULATED	-2.334	1	09182 Protein families: genetic information processing;03051 Proteasome;K03064	K03064	PSMC6,	26S proteasome regulatory subunit T4
dark-hl	UPREGULATED	-1.506	1	09182 Protein families: genetic information processing;03051 Proteasome;K03065	K03065	PSMC3,	26S proteasome regulatory subunit T5
dark-hl	UPREGULATED	-2.359	1	09182 Protein families: genetic information processing;03051 Proteasome;K03283	K03283	HSPA1_6_8	heat shock 70kDa protein 1/6/8
dark-hl	UPREGULATED	-3.844	1	09182 Protein families: genetic information processing;03051 Proteasome;K04079	K04079	HSP90A,	molecular chaperone HtpG
dark-hl	UPREGULATED	-1.835	0.998	09182 Protein families: genetic information processing;03051 Proteasome;K06691	K06691	RPN13	26S proteasome regulatory subunit N13
dark-hl	UPREGULATED	-1.895	1	09182 Protein families: genetic information processing;03051 Proteasome;K11598	K11598	PSMB11	20S proteasome subunit beta 11 [EC:3.4.25.1]
dark-hl	UPREGULATED	-1.236	1	09182 Protein families: genetic information processing;03051 Proteasome;K11599	K11599	POMP,	proteasome maturation protein
dark-hl	UPREGULATED	-2.199	0.999	09182 Protein families: genetic information processing;03051 Proteasome;K11883	K11883	NOB1	RNA-binding protein NOB1
dark-hl	UPREGULATED	-2.13	0.994	09182 Protein families: genetic information processing;03110 Chaperones and folding catalysts;K01275	K01275	CTSC	cathepsin C [EC:3.4.14.1]
dark-hl	UPREGULATED	-2.13	0.994	09182 Protein families: genetic information processing;03110 Chaperones and folding catalysts;K01363	K01363	CTSB	cathepsin B [EC:3.4.22.1]
dark-hl	UPREGULATED	-2.13	0.994	09182 Protein families: genetic information processing;03110 Chaperones and folding catalysts;K01365	K01365	CTSL	cathepsin L [EC:3.4.22.15]
dark-hl	UPREGULATED	-2.957	1	09182 Protein families: genetic information processing;03110 Chaperones and folding catalysts;K02108	K02108	ATPF0A,	F-type H+-transporting ATPase subunit a
dark-hl	UPREGULATED	-2.359	1	09182 Protein families: genetic information processing;03110 Chaperones and folding catalysts;K03283	K03283	HSPA1_6_8	heat shock 70kDa protein 1/6/8
dark-hl	UPREGULATED	-2.171	0.997	09182 Protein families: genetic information processing;03110 Chaperones and folding catalysts;K03672	K03672	trxC	thioredoxin 2 [EC:1.8.1.8]
dark-hl	UPREGULATED	-2.71	1	09182 Protein families: genetic information processing;03110 Chaperones and folding catalysts;K03687	K03687	GRPE	molecular chaperone GrpE
dark-hl	UPREGULATED	-2.495	1	09182 Protein families: genetic information processing;03110 Chaperones and folding catalysts;K03767	K03767	PPIA	peptidyl-prolyl cis-trans isomerase A (cyclophilin A) [EC:5.2.1.8]
dark-hl	UPREGULATED	-1.76	1	09182 Protein families: genetic information processing;03110 Chaperones and folding catalysts;K03768	K03768	PPIB,	peptidyl-prolyl cis-trans isomerase B (cyclophilin B) [EC:5.2.1.8]
dark-hl	UPREGULATED	-2.614	1	09182 Protein families: genetic information processing;03110 Chaperones and folding catalysts;K03773	K03773	fklB	FKBP-type peptidyl-prolyl cis-trans isomerase FklB [EC:5.2.1.8]
dark-hl	UPREGULATED	-1.097	1	09182 Protein families: genetic information processing;03110 Chaperones and folding catalysts;K03798	K03798	ftsH,	cell division protease FtsH [EC:3.4.24.-]
dark-hl	UPREGULATED	-2.456	1	09182 Protein families: genetic information processing;03110 Chaperones and folding catalysts;K04043	K04043	dnaK,	molecular chaperone DnaK
dark-hl	UPREGULATED	-1.322	1	09182 Protein families: genetic information processing;03110 Chaperones and folding catalysts;K04077	K04077	groEL,	chaperonin GroEL [EC:5.6.1.7]
dark-hl	UPREGULATED	-3.552	1	09182 Protein families: genetic information processing;03110 Chaperones and folding catalysts;K04078	K04078	groES,	chaperonin GroES
dark-hl	UPREGULATED	-3.844	1	09182 Protein families: genetic information processing;03110 Chaperones and folding catalysts;K04079	K04079	HSP90A,	molecular chaperone HtpG
dark-hl	UPREGULATED	-2.241	0.996	09182 Protein families: genetic information processing;03110 Chaperones and folding catalysts;K05864	K05864	PPID,	peptidyl-prolyl isomerase D [EC:5.2.1.8]
dark-hl	UPREGULATED	-1.992	1	09182 Protein families: genetic information processing;03110 Chaperones and folding catalysts;K08054	K08054	CANX	calnexin
dark-hl	UPREGULATED	-2.671	1	09182 Protein families: genetic information processing;03110 Chaperones and folding catalysts;K08057	K08057	CALR	calreticulin
dark-hl	UPREGULATED	-1.164	1	09182 Protein families: genetic information processing;03110 Chaperones and folding catalysts;K09485	K09485	HSP110	heat shock protein 110kDa
dark-hl	UPREGULATED	-3.737	1	09182 Protein families: genetic information processing;03110 Chaperones and folding catalysts;K09487	K09487	HSP90B,	heat shock protein 90kDa beta
dark-hl	UPREGULATED	-2.244	1	09182 Protein families: genetic information processing;03110 Chaperones and folding catalysts;K09488	K09488	TRAP1,	TNF receptor-associated protein 1
dark-hl	UPREGULATED	-1.164	1	09182 Protein families: genetic information processing;03110 Chaperones and folding catalysts;K09489	K09489	HSPA4	heat shock 70kDa protein 4
dark-hl	UPREGULATED	-1.833	1	09182 Protein families: genetic information processing;03110 Chaperones and folding catalysts;K09490	K09490	HSPA5,	endoplasmic reticulum chaperone BiP [EC:3.6.4.10]
dark-hl	UPREGULATED	-2.387	0.999	09182 Protein families: genetic information processing;03110 Chaperones and folding catalysts;K09493	K09493	CCT1,	T-complex protein 1 subunit alpha
dark-hl	UPREGULATED	-1.833	1	09182 Protein families: genetic information processing;03110 Chaperones and folding catalysts;K09499	K09499	CCT7	T-complex protein 1 subunit eta
dark-hl	UPREGULATED	-2.684	1	09182 Protein families: genetic information processing;03110 Chaperones and folding catalysts;K09502	K09502	DNAJA1	DnaJ homolog subfamily A member 1
dark-hl	UPREGULATED	-1.948	1	09182 Protein families: genetic information processing;03110 Chaperones and folding catalysts;K09503	K09503	DNAJA2	DnaJ homolog subfamily A member 2
dark-hl	UPREGULATED	-1.446	0.956	09182 Protein families: genetic information processing;03110 Chaperones and folding catalysts;K09510	K09510	DNAJB4	DnaJ homolog subfamily B member 4
dark-hl	UPREGULATED	-1.446	0.956	09182 Protein families: genetic information processing;03110 Chaperones and folding catalysts;K09512	K09512	DNAJB6	DnaJ homolog subfamily B member 6
dark-hl	UPREGULATED	-2.701	1	09182 Protein families: genetic information processing;03110 Chaperones and folding catalysts;K09517	K09517	DNAJB11	DnaJ homolog subfamily B member 11
dark-hl	UPREGULATED	-1.929	1	09182 Protein families: genetic information processing;03110 Chaperones and folding catalysts;K09535	K09535	DNAJC15	DnaJ homolog subfamily C member 15
dark-hl	UPREGULATED	-2.136	0.996	09182 Protein families: genetic information processing;03110 Chaperones and folding catalysts;K09536	K09536	DNAJC16	DnaJ homolog subfamily C member 16
dark-hl	UPREGULATED	-1.929	1	09182 Protein families: genetic information processing;03110 Chaperones and folding catalysts;K09539	K09539	DNAJC19	DnaJ homolog subfamily C member 19
dark-hl	UPREGULATED	-3.754	1	09182 Protein families: genetic information processing;03110 Chaperones and folding catalysts;K09553	K09553	STIP1	stress-induced-phosphoprotein 1
dark-hl	UPREGULATED	-1.965	0.999	09182 Protein families: genetic information processing;03110 Chaperones and folding catalysts;K09554	K09554	CDC37	cell division cycle protein 37
dark-hl	UPREGULATED	-2.765	1	09182 Protein families: genetic information processing;03110 Chaperones and folding catalysts;K09557	K09557	BAG3	BCL2-associated athanogene 3
dark-hl	UPREGULATED	-3.229	1	09182 Protein families: genetic information processing;03110 Chaperones and folding catalysts;K09560	K09560	ST13	suppressor of tumorigenicity protein 13
dark-hl	UPREGULATED	-2.495	1	09182 Protein families: genetic information processing;03110 Chaperones and folding catalysts;K09565	K09565	PPIF	peptidyl-prolyl isomerase F (cyclophilin D) [EC:5.2.1.8]
dark-hl	UPREGULATED	-1.947	0.999	09182 Protein families: genetic information processing;03110 Chaperones and folding catalysts;K09566	K09566	PPIG	peptidyl-prolyl isomerase G (cyclophilin G) [EC:5.2.1.8]
dark-hl	UPREGULATED	-2.943	1	09182 Protein families: genetic information processing;03110 Chaperones and folding catalysts;K09568	K09568	FKBP1	FK506-binding protein 1 [EC:5.2.1.8]
dark-hl	UPREGULATED	-2.614	1	09182 Protein families: genetic information processing;03110 Chaperones and folding catalysts;K09572	K09572	FKBP6	FK506-binding protein 6 [EC:5.2.1.8]
dark-hl	UPREGULATED	-2.636	1	09182 Protein families: genetic information processing;03110 Chaperones and folding catalysts;K09574	K09574	FKBP8	FK506-binding protein 8 [EC:5.2.1.8]
dark-hl	UPREGULATED	-3.02	1	09182 Protein families: genetic information processing;03110 Chaperones and folding catalysts;K09584	K09584	PDIA6,	protein disulfide-isomerase A6 [EC:5.3.4.1]
dark-hl	UPREGULATED	-2.69	1	09182 Protein families: genetic information processing;03110 Chaperones and folding catalysts;K12734	K12734	PPIL3	peptidyl-prolyl cis-trans isomerase-like 3 [EC:5.2.1.8]
dark-hl	UPREGULATED	-3.716	1	09182 Protein families: genetic information processing;03110 Chaperones and folding catalysts;K13984	K13984	TXNDC5,	thioredoxin domain-containing protein 5 [EC:5.3.4.1]
dark-hl	UPREGULATED	-2.943	1	09182 Protein families: genetic information processing;03110 Chaperones and folding catalysts;K20097	K20097	FKBPL	FK506-binding protein-like
[truncated: 2,176 more rows]

## Sheet: PgV 4hpi
Supplementary Table S10: Statistically up- and down-regulated functions according to ASC posterior probability associated with PgV infection, 4 hours post infection. Columns B-D mark the direction of the change, log-e relative expression, and posterior probability, respectively. Columns E, G, H list BRITE hierarchy, symbol and description for every significantly changed KEGG ortholog (column F).
Condition	UP/DOWN	ExpressionDelta	Post-p	BRITE	KEGG Ortholog	Symbol	Description
T4CxV	UPREGULATED	-1.03	0.974	09100 Metabolism;09101 Carbohydrate metabolism;00010 Glycolysis / Gluconeogenesis;K00128	K00128	ALDH	aldehyde dehydrogenase (NAD+) [EC:1.2.1.3]
T4CxV	UPREGULATED	-1.026	0.974	09100 Metabolism;09101 Carbohydrate metabolism;00040 Pentose and glucuronate interconversions;K01686	K01686	uxuA	mannonate dehydratase [EC:4.2.1.8]
T4CxV	UPREGULATED	-1.03	0.974	09100 Metabolism;09101 Carbohydrate metabolism;00053 Ascorbate and aldarate metabolism;K00128	K00128	ALDH	aldehyde dehydrogenase (NAD+) [EC:1.2.1.3]
T4CxV	UPREGULATED	-1.03	0.974	09100 Metabolism;09101 Carbohydrate metabolism;00620 Pyruvate metabolism;K00128	K00128	ALDH	aldehyde dehydrogenase (NAD+) [EC:1.2.1.3]
T4CxV	UPREGULATED	-1.36	0.961	09100 Metabolism;09102 Energy metabolism;00190 Oxidative phosphorylation;K00412	K00412	CYTB,	ubiquinol-cytochrome c reductase cytochrome b subunit
T4CxV	UPREGULATED	-1.465	1	09100 Metabolism;09102 Energy metabolism;00195 Photosynthesis;K02703	K02703	psbA	photosystem II P680 reaction center D1 protein [EC:1.10.3.9]
T4CxV	UPREGULATED	-1.285	0.956	09100 Metabolism;09102 Energy metabolism;00195 Photosynthesis;K02704	K02704	psbB	photosystem II CP47 chlorophyll apoprotein
T4CxV	UPREGULATED	-1.061	0.974	09100 Metabolism;09102 Energy metabolism;00195 Photosynthesis;K02710	K02710	psbI	photosystem II PsbI protein
T4CxV	UPREGULATED	-1.161	0.955	09100 Metabolism;09102 Energy metabolism;00195 Photosynthesis;K02713	K02713	psbL	photosystem II PsbL protein
T4CxV	UPREGULATED	-1.03	0.974	09100 Metabolism;09103 Lipid metabolism;00071 Fatty acid degradation;K00128	K00128	ALDH	aldehyde dehydrogenase (NAD+) [EC:1.2.1.3]
T4CxV	UPREGULATED	-1.03	0.974	09100 Metabolism;09103 Lipid metabolism;00561 Glycerolipid metabolism;K00128	K00128	ALDH	aldehyde dehydrogenase (NAD+) [EC:1.2.1.3]
T4CxV	UPREGULATED	-1.039	0.994	09100 Metabolism;09103 Lipid metabolism;00561 Glycerolipid metabolism;K01054	K01054	MGLL	acylglycerol lipase [EC:3.1.1.23]
T4CxV	UPREGULATED	-1.051	0.989	09100 Metabolism;09103 Lipid metabolism;00564 Glycerophospholipid metabolism;K06128	K06128	LYPLA1	lysophospholipase I [EC:3.1.1.5]
T4CxV	UPREGULATED	-1.051	0.989	09100 Metabolism;09103 Lipid metabolism;00564 Glycerophospholipid metabolism;K06130	K06130	LYPLA2	lysophospholipase II [EC:3.1.1.5]
T4CxV	UPREGULATED	-1.612	0.999	09100 Metabolism;09105 Amino acid metabolism;00250 Alanine, aspartate and glutamate metabolism;K13566	K13566	NIT2,	omega-amidase [EC:3.5.1.3]
T4CxV	UPREGULATED	-1.03	0.974	09100 Metabolism;09105 Amino acid metabolism;00280 Valine, leucine and isoleucine degradation;K00128	K00128	ALDH	aldehyde dehydrogenase (NAD+) [EC:1.2.1.3]
T4CxV	UPREGULATED	-1.03	0.974	09100 Metabolism;09105 Amino acid metabolism;00310 Lysine degradation;K00128	K00128	ALDH	aldehyde dehydrogenase (NAD+) [EC:1.2.1.3]
T4CxV	UPREGULATED	-1.03	0.974	09100 Metabolism;09105 Amino acid metabolism;00330 Arginine and proline metabolism;K00128	K00128	ALDH	aldehyde dehydrogenase (NAD+) [EC:1.2.1.3]
T4CxV	UPREGULATED	-1.03	0.974	09100 Metabolism;09105 Amino acid metabolism;00340 Histidine metabolism;K00128	K00128	ALDH	aldehyde dehydrogenase (NAD+) [EC:1.2.1.3]
T4CxV	UPREGULATED	-1.03	0.974	09100 Metabolism;09105 Amino acid metabolism;00380 Tryptophan metabolism;K00128	K00128	ALDH	aldehyde dehydrogenase (NAD+) [EC:1.2.1.3]
T4CxV	UPREGULATED	-1.03	0.974	09100 Metabolism;09106 Metabolism of other amino acids;00410 beta-Alanine metabolism;K00128	K00128	ALDH	aldehyde dehydrogenase (NAD+) [EC:1.2.1.3]
T4CxV	UPREGULATED	-1.079	1	09100 Metabolism;09106 Metabolism of other amino acids;00450 Selenocompound metabolism;K01008	K01008	selD,	selenide, water dikinase [EC:2.7.9.3]
T4CxV	UPREGULATED	-1.493	0.986	09100 Metabolism;09107 Glycan biosynthesis and metabolism;00510 N-Glycan biosynthesis;K03845	K03845	ALG3	alpha-1,3-mannosyltransferase [EC:2.4.1.258]
T4CxV	UPREGULATED	-1.493	0.986	09100 Metabolism;09107 Glycan biosynthesis and metabolism;00513 Various types of N-glycan biosynthesis;K03845	K03845	ALG3	alpha-1,3-mannosyltransferase [EC:2.4.1.258]
T4CxV	UPREGULATED	-1.459	1	09100 Metabolism;09107 Glycan biosynthesis and metabolism;00550 Peptidoglycan biosynthesis;K01000	K01000	mraY	phospho-N-acetylmuramoyl-pentapeptide-transferase [EC:2.7.8.13]
T4CxV	UPREGULATED	-1.03	0.974	09100 Metabolism;09108 Metabolism of cofactors and vitamins;00770 Pantothenate and CoA biosynthesis;K00128	K00128	ALDH	aldehyde dehydrogenase (NAD+) [EC:1.2.1.3]
T4CxV	UPREGULATED	-1.363	1	09100 Metabolism;09108 Metabolism of cofactors and vitamins;00785 Lipoic acid metabolism;K03644	K03644	lipA,	lipoyl synthase [EC:2.8.1.8]
T4CxV	UPREGULATED	-1.094	0.977	09100 Metabolism;09108 Metabolism of cofactors and vitamins;00860 Porphyrin metabolism;K03428	K03428	bchM,	magnesium-protoporphyrin O-methyltransferase [EC:2.1.1.11]
T4CxV	UPREGULATED	-1.03	0.974	09100 Metabolism;09109 Metabolism of terpenoids and polyketides;00903 Limonene degradation;K00128	K00128	ALDH	aldehyde dehydrogenase (NAD+) [EC:1.2.1.3]
T4CxV	UPREGULATED	-1.03	0.974	09100 Metabolism;09109 Metabolism of terpenoids and polyketides;00981 Insect hormone biosynthesis;K00128	K00128	ALDH	aldehyde dehydrogenase (NAD+) [EC:1.2.1.3]
T4CxV	UPREGULATED	-1.03	0.974	09100 Metabolism;09111 Xenobiotics biodegradation and metabolism;00625 Chloroalkane and chloroalkene degradation;K00128	K00128	ALDH	aldehyde dehydrogenase (NAD+) [EC:1.2.1.3]
T4CxV	UPREGULATED	-1.1	1	09120 Genetic Information Processing;09121 Transcription;03022 Basal transcription factors;K03132	K03132	TAF7	transcription initiation factor TFIID subunit 7
T4CxV	UPREGULATED	-1.308	1	09120 Genetic Information Processing;09121 Transcription;03040 Spliceosome;K12867	K12867	SYF1,	pre-mRNA-splicing factor SYF1
T4CxV	UPREGULATED	-1.13	0.999	09120 Genetic Information Processing;09122 Translation;00970 Aminoacyl-tRNA biosynthesis;K01886	K01886	QARS,	glutaminyl-tRNA synthetase [EC:6.1.1.18]
T4CxV	UPREGULATED	-1.229	0.997	09120 Genetic Information Processing;09122 Translation;03008 Ribosome biogenesis in eukaryotes;K03115	K03115	CSNK2B	casein kinase II subunit beta
T4CxV	UPREGULATED	-1.222	1	09120 Genetic Information Processing;09122 Translation;03008 Ribosome biogenesis in eukaryotes;K11108	K11108	RCL1	RNA 3'-terminal phosphate cyclase-like protein
T4CxV	UPREGULATED	-1.229	0.997	09120 Genetic Information Processing;09122 Translation;03008 Ribosome biogenesis in eukaryotes;K14566	K14566	UTP24,	U3 small nucleolar RNA-associated protein 24
T4CxV	UPREGULATED	-1.363	1	09120 Genetic Information Processing;09122 Translation;03010 Ribosome;K02872	K02872	RP-L13Ae,	large subunit ribosomal protein L13Ae
T4CxV	UPREGULATED	-1.135	0.997	09120 Genetic Information Processing;09122 Translation;03010 Ribosome;K02873	K02873	RP-L13e,	large subunit ribosomal protein L13e
T4CxV	UPREGULATED	-1.308	1	09120 Genetic Information Processing;09122 Translation;03010 Ribosome;K02875	K02875	RP-L14e,	large subunit ribosomal protein L14e
T4CxV	UPREGULATED	-1.136	1	09120 Genetic Information Processing;09122 Translation;03010 Ribosome;K02877	K02877	RP-L15e,	large subunit ribosomal protein L15e
T4CxV	UPREGULATED	-1.028	0.991	09120 Genetic Information Processing;09122 Translation;03010 Ribosome;K02880	K02880	RP-L17e,	large subunit ribosomal protein L17e
T4CxV	UPREGULATED	-1.163	0.999	09120 Genetic Information Processing;09122 Translation;03010 Ribosome;K02883	K02883	RP-L18e,	large subunit ribosomal protein L18e
T4CxV	UPREGULATED	-1.369	1	09120 Genetic Information Processing;09122 Translation;03010 Ribosome;K02891	K02891	RP-L22e,	large subunit ribosomal protein L22e
T4CxV	UPREGULATED	-1.307	1	09120 Genetic Information Processing;09122 Translation;03010 Ribosome;K02898	K02898	RP-L26e,	large subunit ribosomal protein L26e
T4CxV	UPREGULATED	-1.612	0.999	09120 Genetic Information Processing;09122 Translation;03010 Ribosome;K02910	K02910	RP-L31e,	large subunit ribosomal protein L31e
T4CxV	UPREGULATED	-1.1	1	09120 Genetic Information Processing;09122 Translation;03010 Ribosome;K02912	K02912	RP-L32e,	large subunit ribosomal protein L32e
T4CxV	UPREGULATED	-1.252	1	09120 Genetic Information Processing;09122 Translation;03010 Ribosome;K02915	K02915	RP-L34e,	large subunit ribosomal protein L34e
T4CxV	UPREGULATED	-1.229	0.997	09120 Genetic Information Processing;09122 Translation;03010 Ribosome;K02920	K02920	RP-L36e,	large subunit ribosomal protein L36e
T4CxV	UPREGULATED	-1.03	0.974	09120 Genetic Information Processing;09122 Translation;03010 Ribosome;K02922	K02922	RP-L37e,	large subunit ribosomal protein L37e
T4CxV	UPREGULATED	-1.13	0.999	09120 Genetic Information Processing;09122 Translation;03010 Ribosome;K02924	K02924	RP-L39e,	large subunit ribosomal protein L39e
T4CxV	UPREGULATED	-1.363	1	09120 Genetic Information Processing;09122 Translation;03010 Ribosome;K02934	K02934	RP-L6e,	large subunit ribosomal protein L6e
T4CxV	UPREGULATED	-1.039	0.994	09120 Genetic Information Processing;09122 Translation;03010 Ribosome;K02936	K02936	RP-L7Ae,	large subunit ribosomal protein L7Ae
T4CxV	UPREGULATED	-1.333	1	09120 Genetic Information Processing;09122 Translation;03010 Ribosome;K02938	K02938	RP-L8e,	large subunit ribosomal protein L8e
T4CxV	UPREGULATED	-1.459	1	09120 Genetic Information Processing;09122 Translation;03010 Ribosome;K02955	K02955	RP-S14e,	small subunit ribosomal protein S14e
T4CxV	UPREGULATED	-1.029	0.995	09120 Genetic Information Processing;09122 Translation;03010 Ribosome;K02966	K02966	RP-S19e,	small subunit ribosomal protein S19e
T4CxV	UPREGULATED	-1.079	1	09120 Genetic Information Processing;09122 Translation;03010 Ribosome;K02974	K02974	RP-S24e,	small subunit ribosomal protein S24e
T4CxV	UPREGULATED	-1.316	1	09120 Genetic Information Processing;09122 Translation;03010 Ribosome;K02978	K02978	RP-S27e,	small subunit ribosomal protein S27e
T4CxV	UPREGULATED	-1.431	1	09120 Genetic Information Processing;09122 Translation;03010 Ribosome;K02985	K02985	RP-S3e,	small subunit ribosomal protein S3e
T4CxV	UPREGULATED	-1.285	1	09120 Genetic Information Processing;09122 Translation;03010 Ribosome;K02995	K02995	RP-S8e,	small subunit ribosomal protein S8e
T4CxV	UPREGULATED	-1.044	0.959	09120 Genetic Information Processing;09122 Translation;03010 Ribosome;K02997	K02997	RP-S9e,	small subunit ribosomal protein S9e
T4CxV	UPREGULATED	-1.03	0.974	09120 Genetic Information Processing;09122 Translation;03015 mRNA surveillance pathway;K06269	K06269	PPP1C	serine/threonine-protein phosphatase PP1 catalytic subunit [EC:3.1.3.16]
T4CxV	UPREGULATED	-1.493	0.986	09120 Genetic Information Processing;09123 Folding, sorting and degradation;04120 Ubiquitin mediated proteolysis;K10684	K10684	UBLE1A,	ubiquitin-like 1-activating enzyme E1 A [EC:6.2.1.45]
T4CxV	UPREGULATED	-1.1	1	09120 Genetic Information Processing;09123 Folding, sorting and degradation;04141 Protein processing in endoplasmic reticulum;K09503	K09503	DNAJA2	DnaJ homolog subfamily A member 2
T4CxV	UPREGULATED	-1.135	0.997	09120 Genetic Information Processing;09124 Replication and repair;03030 DNA replication;K10755	K10755	RFC2_4	replication factor C subunit 2/4
T4CxV	UPREGULATED	-1.135	0.997	09120 Genetic Information Processing;09124 Replication and repair;03410 Base excision repair;K10755	K10755	RFC2_4	replication factor C subunit 2/4
T4CxV	UPREGULATED	-1.135	0.997	09120 Genetic Information Processing;09124 Replication and repair;03420 Nucleotide excision repair;K10755	K10755	RFC2_4	replication factor C subunit 2/4
T4CxV	UPREGULATED	-1.135	0.997	09120 Genetic Information Processing;09124 Replication and repair;03430 Mismatch repair;K10755	K10755	RFC2_4	replication factor C subunit 2/4
T4CxV	UPREGULATED	-1.284	0.965	09120 Genetic Information Processing;09124 Replication and repair;03440 Homologous recombination;K10865	K10865	MRE11	double-strand break repair protein MRE11
T4CxV	UPREGULATED	-1.284	0.965	09120 Genetic Information Processing;09124 Replication and repair;03450 Non-homologous end-joining;K10865	K10865	MRE11	double-strand break repair protein MRE11
T4CxV	UPREGULATED	-1.72	1	09120 Genetic Information Processing;09124 Replication and repair;03450 Non-homologous end-joining;K10884	K10884	XRCC6,	ATP-dependent DNA helicase 2 subunit 1
T4CxV	UPREGULATED	-1.039	0.994	09120 Genetic Information Processing;09126 Chromosome;03082 ATP-dependent chromatin remodeling;K11649	K11649	SMARCC	SWI/SNF-related matrix-associated actin-dependent regulator of chromatin subfamily C
T4CxV	UPREGULATED	-1.229	0.997	09120 Genetic Information Processing;09126 Chromosome;03083 Polycomb repressive complex;K03115	K03115	CSNK2B	casein kinase II subunit beta
T4CxV	UPREGULATED	-1.36	0.961	09130 Environmental Information Processing;09132 Signal transduction;02020 Two-component system;K00412	K00412	CYTB,	ubiquinol-cytochrome c reductase cytochrome b subunit
T4CxV	UPREGULATED	-1.316	1	09130 Environmental Information Processing;09132 Signal transduction;04010 MAPK signaling pathway;K08053	K08053	RASA2,	Ras GTPase-activating protein 2
T4CxV	UPREGULATED	-1.316	1	09130 Environmental Information Processing;09132 Signal transduction;04014 Ras signaling pathway;K08053	K08053	RASA2,	Ras GTPase-activating protein 2
T4CxV	UPREGULATED	-1.039	0.994	09130 Environmental Information Processing;09132 Signal transduction;04015 Rap1 signaling pathway;K17697	K17697	DOCK4	dedicator of cytokinesis protein 4
T4CxV	UPREGULATED	-1.108	0.99	09130 Environmental Information Processing;09132 Signal transduction;04016 MAPK signaling pathway - plant;K20716	K20716	MAPKKK17_18	mitogen-activated protein kinase kinase kinase 17/18
T4CxV	UPREGULATED	-1.03	0.974	09130 Environmental Information Processing;09132 Signal transduction;04022 cGMP-PKG signaling pathway;K06269	K06269	PPP1C	serine/threonine-protein phosphatase PP1 catalytic subunit [EC:3.1.3.16]
T4CxV	UPREGULATED	-1.03	0.974	09130 Environmental Information Processing;09132 Signal transduction;04024 cAMP signaling pathway;K06269	K06269	PPP1C	serine/threonine-protein phosphatase PP1 catalytic subunit [EC:3.1.3.16]
T4CxV	UPREGULATED	-1.229	0.997	09130 Environmental Information Processing;09132 Signal transduction;04064 NF-kappa B signaling pathway;K03115	K03115	CSNK2B	casein kinase II subunit beta
T4CxV	UPREGULATED	-1.039	0.994	09130 Environmental Information Processing;09132 Signal transduction;04150 mTOR signaling pathway;K08272	K08272	CAB39,	calcium binding protein 39
T4CxV	UPREGULATED	-1.039	0.994	09130 Environmental Information Processing;09132 Signal transduction;04152 AMPK signaling pathway;K08272	K08272	CAB39,	calcium binding protein 39
T4CxV	UPREGULATED	-1.229	0.997	09130 Environmental Information Processing;09132 Signal transduction;04310 Wnt signaling pathway;K03115	K03115	CSNK2B	casein kinase II subunit beta
T4CxV	UPREGULATED	-1.03	0.974	09130 Environmental Information Processing;09132 Signal transduction;04390 Hippo signaling pathway;K06269	K06269	PPP1C	serine/threonine-protein phosphatase PP1 catalytic subunit [EC:3.1.3.16]
T4CxV	UPREGULATED	-1.1	1	09130 Environmental Information Processing;09133 Signaling molecules and interaction;04080 Neuroactive ligand-receptor interaction;K04805	K04805	CHRNA3	nicotinic acetylcholine receptor alpha-3
T4CxV	UPREGULATED	-1.229	0.997	09140 Cellular Processes;09141 Transport and catabolism;04137 Mitophagy - animal;K03115	K03115	CSNK2B	casein kinase II subunit beta
T4CxV	UPREGULATED	-1.229	0.997	09140 Cellular Processes;09141 Transport and catabolism;04139 Mitophagy - yeast;K03115	K03115	CSNK2B	casein kinase II subunit beta
T4CxV	UPREGULATED	-1.03	0.974	09140 Cellular Processes;09141 Transport and catabolism;04144 Endocytosis;K07891	K07891	RAB22	Ras-related protein Rab-22
T4CxV	UPREGULATED	-1.03	0.974	09140 Cellular Processes;09142 Cell motility;04810 Regulation of actin cytoskeleton;K06269	K06269	PPP1C	serine/threonine-protein phosphatase PP1 catalytic subunit [EC:3.1.3.16]
T4CxV	UPREGULATED	-1.03	0.974	09140 Cellular Processes;09143 Cell growth and death;04113 Meiosis - yeast;K06269	K06269	PPP1C	serine/threonine-protein phosphatase PP1 catalytic subunit [EC:3.1.3.16]
T4CxV	UPREGULATED	-1.03	0.974	09140 Cellular Processes;09143 Cell growth and death;04114 Oocyte meiosis;K06269	K06269	PPP1C	serine/threonine-protein phosphatase PP1 catalytic subunit [EC:3.1.3.16]
T4CxV	UPREGULATED	-1.03	0.974	09140 Cellular Processes;09143 Cell growth and death;04218 Cellular senescence;K06269	K06269	PPP1C	serine/threonine-protein phosphatase PP1 catalytic subunit [EC:3.1.3.16]
T4CxV	UPREGULATED	-1.284	0.965	09140 Cellular Processes;09143 Cell growth and death;04218 Cellular senescence;K10865	K10865	MRE11	double-strand break repair protein MRE11
T4CxV	UPREGULATED	-1.03	0.974	09140 Cellular Processes;09144 Cellular community - eukaryotes;04510 Focal adhesion;K06269	K06269	PPP1C	serine/threonine-protein phosphatase PP1 catalytic subunit [EC:3.1.3.16]
T4CxV	UPREGULATED	-1.229	0.997	09140 Cellular Processes;09144 Cellular community - eukaryotes;04520 Adherens junction;K03115	K03115	CSNK2B	casein kinase II subunit beta
T4CxV	UPREGULATED	-1.465	1	09181 Protein families: metabolism;00194 Photosynthesis proteins;K02703	K02703	psbA	photosystem II P680 reaction center D1 protein [EC:1.10.3.9]
T4CxV	UPREGULATED	-1.285	0.956	09181 Protein families: metabolism;00194 Photosynthesis proteins;K02704	K02704	psbB	photosystem II CP47 chlorophyll apoprotein
T4CxV	UPREGULATED	-1.061	0.974	09181 Protein families: metabolism;00194 Photosynthesis proteins;K02710	K02710	psbI	photosystem II PsbI protein
T4CxV	UPREGULATED	-1.161	0.955	09181 Protein families: metabolism;00194 Photosynthesis proteins;K02713	K02713	psbL	photosystem II PsbL protein
T4CxV	UPREGULATED	-1.108	0.99	09181 Protein families: metabolism;01001 Protein kinases;K20716	K20716	MAPKKK17_18	mitogen-activated protein kinase kinase kinase 17/18
T4CxV	UPREGULATED	-1.039	0.994	09181 Protein families: metabolism;01002 Peptidases and inhibitors;K01054	K01054	MGLL	acylglycerol lipase [EC:3.1.1.23]
T4CxV	UPREGULATED	-1.493	0.986	09181 Protein families: metabolism;01003 Glycosyltransferases;K03845	K03845	ALG3	alpha-1,3-mannosyltransferase [EC:2.4.1.258]
T4CxV	UPREGULATED	-1.13	0.999	09181 Protein families: metabolism;01007 Amino acid related enzymes;K01886	K01886	QARS,	glutaminyl-tRNA synthetase [EC:6.1.1.18]
T4CxV	UPREGULATED	-1.03	0.974	09181 Protein families: metabolism;01009 Protein phosphatases and associated proteins;K06269	K06269	PPP1C	serine/threonine-protein phosphatase PP1 catalytic subunit [EC:3.1.3.16]
T4CxV	UPREGULATED	-1.1	1	09181 Protein families: metabolism;01009 Protein phosphatases and associated proteins;K17593	K17593	ANKRD42,	ankyrin repeat domain-containing protein 42
T4CxV	UPREGULATED	-1.316	1	09181 Protein families: metabolism;01009 Protein phosphatases and associated proteins;K18061	K18061	SBF1_2,	myotubularin-related protein 5/13
T4CxV	UPREGULATED	-1.459	1	09181 Protein families: metabolism;01011 Peptidoglycan biosynthesis and degradation proteins;K01000	K01000	mraY	phospho-N-acetylmuramoyl-pentapeptide-transferase [EC:2.7.8.13]
T4CxV	UPREGULATED	-1.481	1	09182 Protein families: genetic information processing;03000 Transcription factors;K09250	K09250	CNBP	cellular nucleic acid-binding protein
T4CxV	UPREGULATED	-1.1	1	09182 Protein families: genetic information processing;03000 Transcription factors;K09329	K09329	PRRX,	paired mesoderm homeobox protein
T4CxV	UPREGULATED	-1.039	0.994	09182 Protein families: genetic information processing;03009 Ribosome biogenesis;K02936	K02936	RP-L7Ae,	large subunit ribosomal protein L7Ae
T4CxV	UPREGULATED	-1.229	0.997	09182 Protein families: genetic information processing;03009 Ribosome biogenesis;K03115	K03115	CSNK2B	casein kinase II subunit beta
T4CxV	UPREGULATED	-1.222	1	09182 Protein families: genetic information processing;03009 Ribosome biogenesis;K11108	K11108	RCL1	RNA 3'-terminal phosphate cyclase-like protein
T4CxV	UPREGULATED	-1.229	0.997	09182 Protein families: genetic information processing;03009 Ribosome biogenesis;K14566	K14566	UTP24,	U3 small nucleolar RNA-associated protein 24
T4CxV	UPREGULATED	-1.881	0.997	09182 Protein families: genetic information processing;03009 Ribosome biogenesis;K14815	K14815	MRT4	mRNA turnover protein 4
T4CxV	UPREGULATED	-1.363	1	09182 Protein families: genetic information processing;03011 Ribosome;K02872	K02872	RP-L13Ae,	large subunit ribosomal protein L13Ae
T4CxV	UPREGULATED	-1.135	0.997	09182 Protein families: genetic information processing;03011 Ribosome;K02873	K02873	RP-L13e,	large subunit ribosomal protein L13e
T4CxV	UPREGULATED	-1.308	1	09182 Protein families: genetic information processing;03011 Ribosome;K02875	K02875	RP-L14e,	large subunit ribosomal protein L14e
T4CxV	UPREGULATED	-1.136	1	09182 Protein families: genetic information processing;03011 Ribosome;K02877	K02877	RP-L15e,	large subunit ribosomal protein L15e
T4CxV	UPREGULATED	-1.028	0.991	09182 Protein families: genetic information processing;03011 Ribosome;K02880	K02880	RP-L17e,	large subunit ribosomal protein L17e
T4CxV	UPREGULATED	-1.163	0.999	09182 Protein families: genetic information processing;03011 Ribosome;K02883	K02883	RP-L18e,	large subunit ribosomal protein L18e
T4CxV	UPREGULATED	-1.369	1	09182 Protein families: genetic information processing;03011 Ribosome;K02891	K02891	RP-L22e,	large subunit ribosomal protein L22e
T4CxV	UPREGULATED	-1.307	1	09182 Protein families: genetic information processing;03011 Ribosome;K02898	K02898	RP-L26e,	large subunit ribosomal protein L26e
T4CxV	UPREGULATED	-1.612	0.999	09182 Protein families: genetic information processing;03011 Ribosome;K02910	K02910	RP-L31e,	large subunit ribosomal protein L31e
T4CxV	UPREGULATED	-1.1	1	09182 Protein families: genetic information processing;03011 Ribosome;K02912	K02912	RP-L32e,	large subunit ribosomal protein L32e
T4CxV	UPREGULATED	-1.252	1	09182 Protein families: genetic information processing;03011 Ribosome;K02915	K02915	RP-L34e,	large subunit ribosomal protein L34e
T4CxV	UPREGULATED	-1.229	0.997	09182 Protein families: genetic information processing;03011 Ribosome;K02920	K02920	RP-L36e,	large subunit ribosomal protein L36e
T4CxV	UPREGULATED	-1.03	0.974	09182 Protein families: genetic information processing;03011 Ribosome;K02922	K02922	RP-L37e,	large subunit ribosomal protein L37e
T4CxV	UPREGULATED	-1.13	0.999	09182 Protein families: genetic information processing;03011 Ribosome;K02924	K02924	RP-L39e,	large subunit ribosomal protein L39e
T4CxV	UPREGULATED	-1.363	1	09182 Protein families: genetic information processing;03011 Ribosome;K02934	K02934	RP-L6e,	large subunit ribosomal protein L6e
T4CxV	UPREGULATED	-1.039	0.994	09182 Protein families: genetic information processing;03011 Ribosome;K02936	K02936	RP-L7Ae,	large subunit ribosomal protein L7Ae
T4CxV	UPREGULATED	-1.333	1	09182 Protein families: genetic information processing;03011 Ribosome;K02938	K02938	RP-L8e,	large subunit ribosomal protein L8e
T4CxV	UPREGULATED	-1.459	1	09182 Protein families: genetic information processing;03011 Ribosome;K02955	K02955	RP-S14e,	small subunit ribosomal protein S14e
T4CxV	UPREGULATED	-1.029	0.995	09182 Protein families: genetic information processing;03011 Ribosome;K02966	K02966	RP-S19e,	small subunit ribosomal protein S19e
T4CxV	UPREGULATED	-1.079	1	09182 Protein families: genetic information processing;03011 Ribosome;K02974	K02974	RP-S24e,	small subunit ribosomal protein S24e
T4CxV	UPREGULATED	-1.316	1	09182 Protein families: genetic information processing;03011 Ribosome;K02978	K02978	RP-S27e,	small subunit ribosomal protein S27e
T4CxV	UPREGULATED	-1.431	1	09182 Protein families: genetic information processing;03011 Ribosome;K02985	K02985	RP-S3e,	small subunit ribosomal protein S3e
T4CxV	UPREGULATED	-1.285	1	09182 Protein families: genetic information processing;03011 Ribosome;K02995	K02995	RP-S8e,	small subunit ribosomal protein S8e
T4CxV	UPREGULATED	-1.044	0.959	09182 Protein families: genetic information processing;03011 Ribosome;K02997	K02997	RP-S9e,	small subunit ribosomal protein S9e
T4CxV	UPREGULATED	-1.612	0.999	09182 Protein families: genetic information processing;03011 Ribosome;K17433	K17433	MRPL52	large subunit ribosomal protein L52
T4CxV	UPREGULATED	-1.079	1	09182 Protein families: genetic information processing;03016 Transfer RNA biogenesis;K01008	K01008	selD,	selenide, water dikinase [EC:2.7.9.3]
T4CxV	UPREGULATED	-1.13	0.999	09182 Protein families: genetic information processing;03016 Transfer RNA biogenesis;K01886	K01886	QARS,	glutaminyl-tRNA synthetase [EC:6.1.1.18]
T4CxV	UPREGULATED	-1.165	0.985	09182 Protein families: genetic information processing;03016 Transfer RNA biogenesis;K15445	K15445	TRMT10,	tRNA (guanine9-N1)-methyltransferase [EC:2.1.1.221]
T4CxV	UPREGULATED	-1.03	0.974	09182 Protein families: genetic information processing;03019 Messenger RNA biogenesis;K06269	K06269	PPP1C	serine/threonine-protein phosphatase PP1 catalytic subunit [EC:3.1.3.16]
T4CxV	UPREGULATED	-1.308	1	09182 Protein families: genetic information processing;03019 Messenger RNA biogenesis;K12867	K12867	SYF1,	pre-mRNA-splicing factor SYF1
T4CxV	UPREGULATED	-1.163	0.999	09182 Protein families: genetic information processing;03019 Messenger RNA biogenesis;K18749	K18749	LSM14,	protein LSM14
T4CxV	UPREGULATED	-1.1	1	09182 Protein families: genetic information processing;03021 Transcription machinery;K03132	K03132	TAF7	transcription initiation factor TFIID subunit 7
T4CxV	UPREGULATED	-1.03	0.974	09182 Protein families: genetic information processing;03021 Transcription machinery;K06269	K06269	PPP1C	serine/threonine-protein phosphatase PP1 catalytic subunit [EC:3.1.3.16]
T4CxV	UPREGULATED	-1.039	0.994	09182 Protein families: genetic information processing;03021 Transcription machinery;K11649	K11649	SMARCC	SWI/SNF-related matrix-associated actin-dependent regulator of chromatin subfamily C
T4CxV	UPREGULATED	-1.36	0.961	09182 Protein families: genetic information processing;03029 Mitochondrial biogenesis;K00412	K00412	CYTB,	ubiquinol-cytochrome c reductase cytochrome b subunit
T4CxV	UPREGULATED	-1.1	1	09182 Protein families: genetic information processing;03029 Mitochondrial biogenesis;K09503	K09503	DNAJA2	DnaJ homolog subfamily A member 2
T4CxV	UPREGULATED	-1.229	0.997	09182 Protein families: genetic information processing;03029 Mitochondrial biogenesis;K17973	K17973	NAA25,	N-terminal acetyltransferase B complex non-catalytic subunit
T4CxV	UPREGULATED	-1.135	0.997	09182 Protein families: genetic information processing;03032 DNA replication proteins;K10755	K10755	RFC2_4	replication factor C subunit 2/4
T4CxV	UPREGULATED	-1.284	0.965	09182 Protein families: genetic information processing;03032 DNA replication proteins;K10865	K10865	MRE11	double-strand break repair protein MRE11
T4CxV	UPREGULATED	-1.229	0.997	09182 Protein families: genetic information processing;03036 Chromosome and associated proteins;K03115	K03115	CSNK2B	casein kinase II subunit beta
T4CxV	UPREGULATED	-1.1	1	09182 Protein families: genetic information processing;03036 Chromosome and associated proteins;K03132	K03132	TAF7	transcription initiation factor TFIID subunit 7
T4CxV	UPREGULATED	-1.135	0.997	09182 Protein families: genetic information processing;03036 Chromosome and associated proteins;K10755	K10755	RFC2_4	replication factor C subunit 2/4
T4CxV	UPREGULATED	-1.039	0.994	09182 Protein families: genetic information processing;03036 Chromosome and associated proteins;K11649	K11649	SMARCC	SWI/SNF-related matrix-associated actin-dependent regulator of chromatin subfamily C
T4CxV	UPREGULATED	-1.03	0.974	09182 Protein families: genetic information processing;03041 Spliceosome;K06269	K06269	PPP1C	serine/threonine-protein phosphatase PP1 catalytic subunit [EC:3.1.3.16]
T4CxV	UPREGULATED	-1.72	1	09182 Protein families: genetic information processing;03041 Spliceosome;K10884	K10884	XRCC6,	ATP-dependent DNA helicase 2 subunit 1
T4CxV	UPREGULATED	-1.308	1	09182 Protein families: genetic information processing;03041 Spliceosome;K12867	K12867	SYF1,	pre-mRNA-splicing factor SYF1
T4CxV	UPREGULATED	-1.1	1	09182 Protein families: genetic information processing;03110 Chaperones and folding catalysts;K09503	K09503	DNAJA2	DnaJ homolog subfamily A member 2
T4CxV	UPREGULATED	-1.03	0.974	09182 Protein families: genetic information processing;03110 Chaperones and folding catalysts;K09557	K09557	BAG3	BCL2-associated athanogene 3
T4CxV	UPREGULATED	-1.135	0.997	09182 Protein families: genetic information processing;03400 DNA repair and recombination proteins;K10755	K10755	RFC2_4	replication factor C subunit 2/4
T4CxV	UPREGULATED	-1.284	0.965	09182 Protein families: genetic information processing;03400 DNA repair and recombination proteins;K10865	K10865	MRE11	double-strand break repair protein MRE11
T4CxV	UPREGULATED	-1.72	1	09182 Protein families: genetic information processing;03400 DNA repair and recombination proteins;K10884	K10884	XRCC6,	ATP-dependent DNA helicase 2 subunit 1
T4CxV	UPREGULATED	-1.493	0.986	09182 Protein families: genetic information processing;04121 Ubiquitin system;K04532	K04532	NAE1,	NEDD8-activating enzyme E1 regulatory subunit
T4CxV	UPREGULATED	-1.493	0.986	09182 Protein families: genetic information processing;04121 Ubiquitin system;K10684	K10684	UBLE1A,	ubiquitin-like 1-activating enzyme E1 A [EC:6.2.1.45]
T4CxV	UPREGULATED	-1.1	1	09182 Protein families: genetic information processing;04121 Ubiquitin system;K17822	K17822	DCUN1D1_2	DCN1-like protein 1/2
T4CxV	UPREGULATED	-1.03	0.974	09182 Protein families: genetic information processing;04131 Membrane trafficking;K07891	K07891	RAB22	Ras-related protein Rab-22
T4CxV	UPREGULATED	-1.03	0.974	09182 Protein families: genetic information processing;04131 Membrane trafficking;K09557	K09557	BAG3	BCL2-associated athanogene 3
T4CxV	UPREGULATED	-1.039	0.994	09182 Protein families: genetic information processing;04131 Membrane trafficking;K17697	K17697	DOCK4	dedicator of cytokinesis protein 4
T4CxV	UPREGULATED	-1.307	1	09182 Protein families: genetic information processing;04131 Membrane trafficking;K20068	K20068	REPS	RalBP1-associated Eps domain-containing protein
T4CxV	UPREGULATED	-1.163	0.999	09182 Protein families: genetic information processing;04131 Membrane trafficking;K21442	K21442	ANKRD54	ankyrin repeat domain-containing protein 54
T4CxV	UPREGULATED	-1.039	0.994	09183 Protein families: signaling and cellular processes;03037 Cilium and associated proteins;K17697	K17697	DOCK4	dedicator of cytokinesis protein 4
T4CxV	UPREGULATED	-1.03	0.974	09183 Protein families: signaling and cellular processes;04031 GTP-binding proteins;K07891	K07891	RAB22	Ras-related protein Rab-22
T4CxV	UPREGULATED	-1.1	1	09183 Protein families: signaling and cellular processes;04040 Ion channels;K04805	K04805	CHRNA3	nicotinic acetylcholine receptor alpha-3
T4CxV	UPREGULATED	-1.1	1	09183 Protein families: signaling and cellular processes;04812 Cytoskeleton proteins;K06990	K06990	MEMO1	MEMO1 family protein
T4CxV	UPREGULATED	-1.222	1	09191 Unclassified: metabolism;99980 Enzymes with EC numbers;K01974	K01974	RTCA,	RNA 3'-terminal phosphate cyclase (ATP) [EC:6.5.1.4]
T4CxV	UPREGULATED	-1.051	0.989	09191 Unclassified: metabolism;99999 Others;K06999	K06999	K06999	phospholipase/carboxylesterase
T4CxV	UPREGULATED	-1.079	1	09193 Unclassified: signaling and cellular processes;99992 Structural proteins;K17338	K17338	REEP1_2_3_4	receptor expression-enhancing protein 1/2/3/4
T4CxV	UPREGULATED	-1.307	1	09193 Unclassified: signaling and cellular processes;99995 Signaling proteins;K18449	K18449	PRUNE2,	prune homolog 2
T4CxV	UPREGULATED	-1.486	1	09194 Poorly characterized;99997 Function unknown;K07018	K07018	K07018	uncharacterized protein
T4CxV	DOWNREGULATED	1.327	0.977	09100 Metabolism;09101 Carbohydrate metabolism;00520 Amino sugar and nucleotide sugar metabolism;K00326	K00326	CYB5R	cytochrome-b5 reductase [EC:1.6.2.2]
T4CxV	DOWNREGULATED	1.264	1	09100 Metabolism;09101 Carbohydrate metabolism;00520 Amino sugar and nucleotide sugar metabolism;K00820	K00820	glmS,	glutamine---fructose-6-phosphate transaminase (isomerizing) [EC:2.6.1.16]
T4CxV	DOWNREGULATED	1.173	0.961	09100 Metabolism;09101 Carbohydrate metabolism;00520 Amino sugar and nucleotide sugar metabolism;K05304	K05304	NANS,	sialic acid synthase [EC:2.5.1.56 2.5.1.57 2.5.1.132]
T4CxV	DOWNREGULATED	1.702	1	09100 Metabolism;09101 Carbohydrate metabolism;00630 Glyoxylate and dicarboxylate metabolism;K22133	K22133	AAE3	oxalate---CoA ligase [EC:6.2.1.8]
T4CxV	DOWNREGULATED	1.092	0.96	09100 Metabolism;09101 Carbohydrate metabolism;00640 Propanoate metabolism;K00167	K00167	BCKDHB,	2-oxoisovalerate dehydrogenase E1 component subunit beta [EC:1.2.4.4]
T4CxV	DOWNREGULATED	1.378	0.997	09100 Metabolism;09102 Energy metabolism;00190 Oxidative phosphorylation;K02154	K02154	ATPeV0A,	V-type H+-transporting ATPase subunit a
T4CxV	DOWNREGULATED	1.876	1	09100 Metabolism;09102 Energy metabolism;00190 Oxidative phosphorylation;K03939	K03939	NDUFS6	NADH dehydrogenase (ubiquinone) Fe-S protein 6
T4CxV	DOWNREGULATED	1.83	1	09100 Metabolism;09102 Energy metabolism;00190 Oxidative phosphorylation;K03943	K03943	NDUFV2	NADH dehydrogenase (ubiquinone) flavoprotein 2 [EC:7.1.1.2]
T4CxV	DOWNREGULATED	2.472	1	09100 Metabolism;09102 Energy metabolism;00196 Photosynthesis - antenna proteins;K08907	K08907	LHCA1	light-harvesting complex I chlorophyll a/b binding protein 1
T4CxV	DOWNREGULATED	2.472	1	09100 Metabolism;09102 Energy metabolism;00196 Photosynthesis - antenna proteins;K08914	K08914	LHCB3	light-harvesting complex II chlorophyll a/b binding protein 3
T4CxV	DOWNREGULATED	2.472	1	09100 Metabolism;09102 Energy metabolism;00196 Photosynthesis - antenna proteins;K14172	K14172	LHCB7	light-harvesting complex II chlorophyll a/b binding protein 7
T4CxV	DOWNREGULATED	1.327	0.977	09100 Metabolism;09102 Energy metabolism;00910 Nitrogen metabolism;K00366	K00366	nirA	ferredoxin-nitrite reductase [EC:1.7.7.1]
T4CxV	DOWNREGULATED	1.702	1	09100 Metabolism;09103 Lipid metabolism;00061 Fatty acid biosynthesis;K18660	K18660	ACSF3	malonyl-CoA/methylmalonyl-CoA synthetase [EC:6.2.1.76 6.2.1.-]
T4CxV	DOWNREGULATED	1.136	0.972	09100 Metabolism;09103 Lipid metabolism;00600 Sphingolipid metabolism;K00654	K00654	SPT	serine palmitoyltransferase [EC:2.3.1.50]
T4CxV	DOWNREGULATED	1.38	1	09100 Metabolism;09103 Lipid metabolism;00600 Sphingolipid metabolism;K04712	K04712	DEGS	sphingolipid 4-desaturase/C4-monooxygenase [EC:1.14.19.17 1.14.18.5]
T4CxV	DOWNREGULATED	1.136	0.972	09100 Metabolism;09103 Lipid metabolism;00600 Sphingolipid metabolism;K04716	K04716	SGPP1	sphingosine-1-phosphate phosphatase 1 [EC:3.1.3.-]
T4CxV	DOWNREGULATED	1.136	0.972	09100 Metabolism;09103 Lipid metabolism;00600 Sphingolipid metabolism;K04717	K04717	SGPP2	sphingosine-1-phosphate phosphotase 2 [EC:3.1.3.-]
T4CxV	DOWNREGULATED	1.625	0.992	09100 Metabolism;09104 Nucleotide metabolism;00230 Purine metabolism;K01939	K01939	purA,	adenylosuccinate synthase [EC:6.3.4.4]
T4CxV	DOWNREGULATED	1.351	0.952	09100 Metabolism;09105 Amino acid metabolism;00220 Arginine biosynthesis;K00620	K00620	argJ	glutamate N-acetyltransferase / amino-acid N-acetyltransferase [EC:2.3.1.35 2.3.1.1]
T4CxV	DOWNREGULATED	1.264	1	09100 Metabolism;09105 Amino acid metabolism;00250 Alanine, aspartate and glutamate metabolism;K00820	K00820	glmS,	glutamine---fructose-6-phosphate transaminase (isomerizing) [EC:2.6.1.16]
T4CxV	DOWNREGULATED	1.625	0.992	09100 Metabolism;09105 Amino acid metabolism;00250 Alanine, aspartate and glutamate metabolism;K01939	K01939	purA,	adenylosuccinate synthase [EC:6.3.4.4]
T4CxV	DOWNREGULATED	1.092	0.96	09100 Metabolism;09105 Amino acid metabolism;00280 Valine, leucine and isoleucine degradation;K00167	K00167	BCKDHB,	2-oxoisovalerate dehydrogenase E1 component subunit beta [EC:1.2.4.4]
T4CxV	DOWNREGULATED	1.702	1	09100 Metabolism;09105 Amino acid metabolism;00280 Valine, leucine and isoleucine degradation;K18660	K18660	ACSF3	malonyl-CoA/methylmalonyl-CoA synthetase [EC:6.2.1.76 6.2.1.-]
T4CxV	DOWNREGULATED	1.208	1	09100 Metabolism;09105 Amino acid metabolism;00330 Arginine and proline metabolism;K00933	K00933	E2.7.3.2	creatine kinase [EC:2.7.3.2]
T4CxV	DOWNREGULATED	1.24	0.97	09100 Metabolism;09105 Amino acid metabolism;00380 Tryptophan metabolism;K00453	K00453	TDO2,	tryptophan 2,3-dioxygenase [EC:1.13.11.11]
T4CxV	DOWNREGULATED	1.24	0.97	09100 Metabolism;09105 Amino acid metabolism;00380 Tryptophan metabolism;K03392	K03392	ACMSD	aminocarboxymuconate-semialdehyde decarboxylase [EC:4.1.1.45]
T4CxV	DOWNREGULATED	1.167	0.951	09100 Metabolism;09106 Metabolism of other amino acids;00440 Phosphonate and phosphinate metabolism;K01841	K01841	pepM	phosphoenolpyruvate phosphomutase [EC:5.4.2.9]
T4CxV	DOWNREGULATED	1.327	0.977	09100 Metabolism;09106 Metabolism of other amino acids;00480 Glutathione metabolism;K01256	K01256	pepN	aminopeptidase N [EC:3.4.11.2]
T4CxV	DOWNREGULATED	1.284	1	09100 Metabolism;09107 Glycan biosynthesis and metabolism;00510 N-Glycan biosynthesis;K07151	K07151	STT3	dolichyl-diphosphooligosaccharide---protein glycosyltransferase [EC:2.4.99.18]
T4CxV	DOWNREGULATED	1.284	1	09100 Metabolism;09107 Glycan biosynthesis and metabolism;00513 Various types of N-glycan biosynthesis;K07151	K07151	STT3	dolichyl-diphosphooligosaccharide---protein glycosyltransferase [EC:2.4.99.18]
T4CxV	DOWNREGULATED	1.248	0.998	09100 Metabolism;09107 Glycan biosynthesis and metabolism;00531 Glycosaminoglycan degradation;K01136	K01136	IDS	iduronate 2-sulfatase [EC:3.1.6.13]
T4CxV	DOWNREGULATED	1.548	0.985	09100 Metabolism;09107 Glycan biosynthesis and metabolism;00531 Glycosaminoglycan degradation;K07964	K07964	HPSE	heparanase [EC:3.2.1.166]
T4CxV	DOWNREGULATED	1.548	0.985	09100 Metabolism;09107 Glycan biosynthesis and metabolism;00531 Glycosaminoglycan degradation;K07965	K07965	HPSE2	heparanase 2 [EC:3.2.1.-]
T4CxV	DOWNREGULATED	1.092	0.96	09100 Metabolism;09108 Metabolism of cofactors and vitamins;00785 Lipoic acid metabolism;K00167	K00167	BCKDHB,	2-oxoisovalerate dehydrogenase E1 component subunit beta [EC:1.2.4.4]
T4CxV	DOWNREGULATED	1.555	1	09100 Metabolism;09108 Metabolism of cofactors and vitamins;00860 Porphyrin metabolism;K03403	K03403	chlH,	magnesium chelatase subunit H [EC:6.6.1.1]
T4CxV	DOWNREGULATED	1.167	0.951	09100 Metabolism;09110 Biosynthesis of other secondary metabolites;00998 Biosynthesis of various antibiotics;K01841	K01841	pepM	phosphoenolpyruvate phosphomutase [EC:5.4.2.9]
T4CxV	DOWNREGULATED	1.677	0.992	09120 Genetic Information Processing;09121 Transcription;03020 RNA polymerase;K03006	K03006	RPB1,	DNA-directed RNA polymerase II subunit RPB1 [EC:2.7.7.6]
T4CxV	DOWNREGULATED	1.721	1	09120 Genetic Information Processing;09121 Transcription;03040 Spliceosome;K03283	K03283	HSPA1_6_8	heat shock 70kDa protein 1/6/8
T4CxV	DOWNREGULATED	1.175	0.994	09120 Genetic Information Processing;09121 Transcription;03040 Spliceosome;K11086	K11086	SNRPB,	small nuclear ribonucleoprotein B and B'
T4CxV	DOWNREGULATED	1.227	0.993	09120 Genetic Information Processing;09121 Transcription;03040 Spliceosome;K12819	K12819	SLU7	pre-mRNA-processing factor SLU7
T4CxV	DOWNREGULATED	1.206	0.981	09120 Genetic Information Processing;09121 Transcription;03040 Spliceosome;K12830	K12830	SF3B3,	splicing factor 3B subunit 3
T4CxV	DOWNREGULATED	1.007	0.999	09120 Genetic Information Processing;09121 Transcription;03040 Spliceosome;K12852	K12852	EFTUD2	116 kDa U5 small nuclear ribonucleoprotein component
T4CxV	DOWNREGULATED	1.796	1	09120 Genetic Information Processing;09121 Transcription;03040 Spliceosome;K12854	K12854	SNRNP200,	pre-mRNA-splicing helicase BRR2 [EC:3.6.4.13]
T4CxV	DOWNREGULATED	1.465	1	09120 Genetic Information Processing;09122 Translation;00970 Aminoacyl-tRNA biosynthesis;K01868	K01868	TARS,	threonyl-tRNA synthetase [EC:6.1.1.3]
T4CxV	DOWNREGULATED	1.876	1	09120 Genetic Information Processing;09122 Translation;03008 Ribosome biogenesis in eukaryotes;K14290	K14290	XPO1,	exportin-1
T4CxV	DOWNREGULATED	1.175	0.994	09120 Genetic Information Processing;09122 Translation;03008 Ribosome biogenesis in eukaryotes;K14566	K14566	UTP24,	U3 small nucleolar RNA-associated protein 24
[truncated: 368 more rows]

## Sheet: PgV 8hpi
Supplementary Table S10: Statistically up- and down-regulated functions according to ASC posterior probability associated with PgV infection, 8 hours post infection. Columns B-D mark the direction of the change, log-e relative expression, and posterior probability, respectively. Columns E, G, H list BRITE hierarchy, symbol and description for every significantly changed KEGG ortholog (column F).
[truncated: 428 more rows]

[truncated: 6 more sheets: PgV 24hp, nitrate amendment, stationary phase, ammonium amendment, colony development, Fe depletion]
