# Supplementary material for: Genome-resolved biogeography of Phaeocystales, cosmopolitan bloom-forming algae
Source: Research Square preprint supplement (doi:10.21203/rs.3.rs-4339559/v1), 2024-06-11
Supplement: Supplementary file 2 [file 2743e04984f8a8b1dd63aaac.xlsx]

## Sheet: top 1000
Supplementary Table S6: Phaeocystales adaptations in temperate and polar biotopes. Protein families (Pfams) found differentially expressed or correlated with iron (Southern Ocean is iron-depleted) are listed. Sheet "top 1000" lists Pfams corresponding to top 1000 orthogroups with highest abundance (TPM) in each of the three biotopes (Arctic, Temperate, Southern Ocean) and their distribution. For …
Pfam	distribution	annotation
PF00003	ATS	7 transmembrane sweet-taste receptor of 3 GCPR
PF00004	ATS	ATPase family associated with various cellular activities (AAA)
PF00005	ATS	ABC transporter
PF00006	ATS	ATP synthase alpha/beta family, nucleotide-binding domain
PF00009	ATS	Elongation factor Tu GTP binding domain
PF00011	ATS	Hsp20/alpha crystallin family
PF00012	ATS	Hsp70 protein
PF00016	ATS	Ribulose bisphosphate carboxylase large chain, catalytic domain
PF00022	ATS	Actin
PF00023	ATS	Ankyrin repeat
PF00024	ATS	PAN domain
PF00025	ATS	ADP-ribosylation factor family
PF00026	ATS	Eukaryotic aspartyl protease
PF00027	ATS	Cyclic nucleotide-binding domain
PF00032	ATS	Cytochrome b(C-terminal)/b6/petD
PF00036	ATS	EF hand
PF00037	ATS	4Fe-4S binding domain
PF00041	ATS	Fibronectin type III domain
PF00043	ATS	Glutathione S-transferase, C-terminal domain
PF00044	ATS	Glyceraldehyde 3-phosphate dehydrogenase, NAD binding domain
PF00046	ATS	Homeodomain
PF00059	ATS	Lectin C-type domain
PF00063	ATS	Myosin head (motor domain)
PF00069	ATS	Protein kinase domain
PF00070	ATS	Pyridine nucleotide-disulphide oxidoreductase
PF00071	ATS	Ras family
PF00076	ATS	RNA recognition motif
PF00082	ATS	Subtilase family
PF00085	ATS	Thioredoxin
PF00089	ATS	Trypsin
PF00091	ATS	Tubulin/FtsZ family, GTPase domain
PF00092	ATS	von Willebrand factor type A domain
PF00098	ATS	Zinc knuckle
PF00101	ATS	Ribulose bisphosphate carboxylase, small chain
PF00106	ATS	short chain dehydrogenase
PF00109	ATS	Beta-ketoacyl synthase, N-terminal domain
PF00112	ATS	Papain family cysteine protease
PF00113	ATS	Enolase, C-terminal TIM barrel domain
PF00115	ATS	Cytochrome C and Quinol oxidase polypeptide I
PF00118	ATS	TCP-1/cpn60 chaperonin family
PF00119	ATS	ATP synthase A chain
PF00120	ATS	Glutamine synthetase, catalytic domain
PF00121	ATS	Triosephosphate isomerase
PF00122	ATS	E1-E2 ATPase
PF00124	ATS	Photosynthetic reaction centre protein
PF00125	ATS	Core histone H2A/H2B/H3/H4
PF00127	ATS	Copper binding proteins, plastocyanin/azurin family
PF00137	ATS	ATP synthase subunit C
PF00140	ATS	Sigma-70 factor, region 1.2
PF00141	ATS	Peroxidase
PF00149	ATS	Calcineurin-like phosphoesterase
PF00153	ATS	Mitochondrial carrier protein
PF00155	ATS	Aminotransferase class I and II
PF00160	ATS	Cyclophilin type peptidyl-prolyl cis-trans isomerase/CLD
PF00162	ATS	Phosphoglycerate kinase
PF00168	ATS	C2 domain
PF00169	ATS	PH domain
PF00173	ATS	Cytochrome b5-like Heme/Steroid binding domain
PF00174	ATS	Oxidoreductase molybdopterin binding domain
PF00175	ATS	Oxidoreductase NAD-binding domain
PF00176	ATS	SNF2-related domain
PF00179	ATS	Ubiquitin-conjugating enzyme
PF00182	ATS	Chitinase class I
PF00183	ATS	Hsp90 protein
PF00217	ATS	ATP:guanido phosphotransferase, C-terminal catalytic domain
PF00223	ATS	Photosystem I psaA/psaB protein
PF00224	ATS	Pyruvate kinase, barrel domain
PF00225	ATS	Kinesin motor domain
PF00226	ATS	DnaJ domain
PF00227	ATS	Proteasome subunit
PF00231	ATS	ATP synthase
PF00235	ATS	Profilin
PF00240	ATS	Ubiquitin family
PF00244	ATS	14-3-3 protein
PF00248	ATS	Aldo/keto reductase family
PF00249	ATS	Myb-like DNA-binding domain
PF00254	ATS	FKBP-type peptidyl-prolyl cis-trans isomerase
PF00255	ATS	Glutathione peroxidase
PF00258	ATS	Flavodoxin
PF00262	ATS	Calreticulin family
PF00266	ATS	Aminotransferase class-V
PF00270	ATS	DEAD/DEAH box helicase
PF00271	ATS	Helicase conserved C-terminal domain
PF00274	ATS	Fructose-bisphosphate aldolase class-I
PF00283	ATS	Cytochrome b559, alpha (gene psbE) and beta (gene psbF)subunits
PF00285	ATS	Citrate synthase, C-terminal domain
PF00289	ATS	Biotin carboxylase, N-terminal domain
PF00300	ATS	Histidine phosphatase superfamily (branch 1)
PF00306	ATS	ATP synthase alpha/beta chain, C terminal domain
PF00310	ATS	Glutamine amidotransferases class-II
PF00313	ATS	'Cold-shock' DNA-binding domain
PF00316	ATS	Fructose-1-6-bisphosphatase, N-terminal domain
PF00317	ATS	Ribonucleotide reductase, all-alpha domain
PF00334	ATS	Nucleoside diphosphate kinase
PF00352	ATS	Transcription factor TFIID (or TATA-binding protein, TBP)
PF00355	ATS	Rieske [2Fe-2S] domain
PF00364	ATS	Biotin-requiring enzyme
PF00397	ATS	WW domain
PF00400	ATS	WD domain, G-beta repeat
PF00401	ATS	ATP synthase, Delta/Epsilon chain, long alpha-helix domain
PF00406	ATS	Adenylate kinase
PF00438	ATS	S-adenosylmethionine synthetase, N-terminal domain
PF00439	ATS	Bromodomain
PF00443	ATS	Ubiquitin carboxyl-terminal hydrolase
PF00456	ATS	Transketolase, thiamine diphosphate binding domain
PF00464	ATS	Serine hydroxymethyltransferase
PF00467	ATS	KOW motif
PF00474	ATS	Sodium:solute symporter family
PF00481	ATS	Protein phosphatase 2C
PF00485	ATS	Phosphoribulokinase / Uridine kinase family
PF00487	ATS	Fatty acid desaturase
PF00493	ATS	MCM P-loop domain
PF00501	ATS	AMP-binding enzyme
PF00504	ATS	Chlorophyll A-B binding protein
PF00505	ATS	HMG (high mobility group) box
PF00514	ATS	Armadillo/beta-catenin-like repeat
PF00520	ATS	Ion transport protein
PF00550	ATS	Phosphopantetheine attachment site
PF00560	ATS	Leucine Rich Repeat
PF00562	ATS	RNA polymerase Rpb2, domain 6
PF00564	ATS	PB1 domain
PF00569	ATS	Zinc finger, ZZ type
PF00571	ATS	CBS domain
PF00574	ATS	Clp protease
PF00575	ATS	S1 RNA binding domain
PF00578	ATS	AhpC/TSA family
PF00583	ATS	Acetyltransferase (GNAT) family
PF00587	ATS	tRNA synthetase class II core domain (G, H, P, S and T)
PF00623	ATS	RNA polymerase Rpb1, domain 2
PF00626	ATS	Gelsolin repeat
PF00627	ATS	UBA/TS-N domain
PF00628	ATS	PHD-finger
PF00629	ATS	MAM domain, meprin/A5/mu
PF00637	ATS	Region in Clathrin and VPS
PF00641	ATS	Zn-finger in Ran binding protein and others
PF00658	ATS	Poly-adenylate binding protein, unique domain
PF00664	ATS	ABC transporter transmembrane region
PF00670	ATS	S-adenosyl-L-homocysteine hydrolase, NAD binding domain
PF00675	ATS	Insulinase (Peptidase family M16)
PF00679	ATS	Elongation factor G C-terminus
PF00682	ATS	HMGL-like
PF00689	ATS	Cation transporting ATPase, C-terminus
PF00690	ATS	Cation transporter/ATPase, N-terminus
PF00698	ATS	Acyl transferase domain
PF00702	ATS	haloacid dehalogenase-like hydrolase
PF00705	ATS	Proliferating cell nuclear antigen, N-terminal domain
PF00719	ATS	Inorganic pyrophosphatase
PF00745	ATS	Glutamyl-tRNAGlu reductase, dimerisation domain
PF00754	ATS	F5/8 type C domain
PF00810	ATS	ER lumen protein retaining receptor
PF00827	ATS	Ribosomal L15
PF00833	ATS	Ribosomal S17
PF00834	ATS	Ribulose-phosphate 3 epimerase family
PF00840	ATS	Glycosyl hydrolase family 7
PF00847	ATS	AP2 domain
PF00861	ATS	Ribosomal L18 of archaea, bacteria, mitoch. and chloroplast
PF00884	ATS	Sulfatase
PF00888	ATS	Cullin family
PF00892	ATS	EamA-like transporter family
PF00900	ATS	Ribosomal family S4e
PF00909	ATS	Ammonium Transporter Family
PF00917	ATS	MATH domain
PF00970	ATS	Oxidoreductase FAD-binding domain
PF00984	ATS	UDP-glucose/GDP-mannose dehydrogenase family, central domain
PF01000	ATS	RNA polymerase Rpb3/RpoA insert domain
PF01036	ATS	Bacteriorhodopsin-like protein
PF01053	ATS	Cys/Met metabolism PLP-dependent enzyme
PF01062	ATS	Bestrophin, RFP-TM, chloride channel
PF01073	ATS	3-beta hydroxysteroid dehydrogenase/isomerase family
PF01116	ATS	Fructose-bisphosphate aldolase class-II
PF01118	ATS	Semialdehyde dehydrogenase, NAD binding domain
PF01145	ATS	SPFH domain / Band 7 family
PF01174	ATS	SNO glutamine amidotransferase family
PF01193	ATS	RNA polymerase Rpb3/Rpb11 dimerisation domain
PF01208	ATS	Uroporphyrinogen decarboxylase (URO-D)
PF01210	ATS	NAD-dependent glycerol-3-phosphate dehydrogenase N-terminus
PF01266	ATS	FAD dependent oxidoreductase
PF01302	ATS	CAP-Gly domain
PF01333	ATS	Apocytochrome F, C-terminal
PF01346	ATS	Domain amino terminal to FKBP-type peptidyl-prolyl isomerase
PF01370	ATS	NAD dependent epimerase/dehydratase family
PF01380	ATS	SIS domain
PF01394	ATS	Clathrin propeller repeat
PF01398	ATS	JAB1/Mov34/MPN/PAD-1 ubiquitin protease
PF01408	ATS	Oxidoreductase family, NAD-binding Rossmann fold
PF01418	ATS	Helix-turn-helix domain, rpiR family
PF01434	ATS	Peptidase family M41
PF01436	ATS	NHL repeat
PF01479	ATS	S4 domain
PF01493	ATS	GXGXG motif
PF01494	ATS	FAD binding domain
PF01501	ATS	Glycosyl transferase family 8
PF01507	ATS	Phosphoadenosine phosphosulfate reductase family
PF01529	ATS	DHHC palmitoyltransferase
PF01549	ATS	ShK domain-like
PF01556	ATS	DnaJ C terminal domain
PF01569	ATS	PAP2 superfamily
PF01578	ATS	Cytochrome C assembly protein
PF01583	ATS	Adenylylsulphate kinase
PF01625	ATS	Peptide methionine sulfoxide reductase
PF01636	ATS	Phosphotransferase enzyme family
PF01641	ATS	SelR domain
PF01645	ATS	Conserved region in glutamate synthase
PF01680	ATS	SOR/SNZ family
PF01699	ATS	Sodium/calcium exchanger protein
PF01716	ATS	Manganese-stabilising protein / photosystem II polypeptide
PF01747	ATS	ATP-sulfurylase
PF01775	ATS	Ribosomal proteins 50S-L18Ae/60S-L20/60S-L18A
PF01777	ATS	Ribosomal L27e protein family
PF01779	ATS	Ribosomal L29e protein family
PF01780	ATS	Ribosomal L37ae protein family
PF01788	ATS	PsbJ
PF01822	ATS	WSC domain
PF01839	ATS	FG-GAP repeat
PF01842	ATS	ACT domain
PF01849	ATS	NAC domain
PF01915	ATS	Glycosyl hydrolase family 3 C-terminal domain
PF01946	ATS	Thi4 family
PF02008	ATS	CXXC zinc finger domain
PF02010	ATS	REJ domain
PF02096	ATS	60Kd inner membrane protein
PF02209	ATS	Villin headpiece domain
PF02301	ATS	HORMA domain
PF02359	ATS	Cell division protein 48 (CDC48), N-terminal domain
PF02419	ATS	PsbL protein
PF02436	ATS	Conserved carboxylase domain
PF02469	ATS	Fasciclin domain
PF02492	ATS	CobW/HypB/UreG, nucleotide-binding domain
PF02507	ATS	Photosystem I reaction centre subunit III
PF02514	ATS	CobN/Magnesium Chelatase
PF02516	ATS	Oligosaccharyl transferase STT3, N-terminal
PF02531	ATS	PsaD
PF02605	ATS	Photosystem I reaction centre subunit XI
PF02747	ATS	Proliferating cell nuclear antigen, C-terminal domain
PF02759	ATS	RUN domain
PF02772	ATS	S-adenosylmethionine synthetase, central domain
PF02773	ATS	S-adenosylmethionine synthetase, C-terminal domain
PF02774	ATS	Semialdehyde dehydrogenase, dimerisation domain
PF02779	ATS	Transketolase, pyrimidine binding domain
PF02780	ATS	Transketolase, C-terminal domain
PF02785	ATS	Biotin carboxylase C-terminal domain
PF02786	ATS	Carbamoyl-phosphate synthase L chain, ATP binding domain
PF02788	ATS	Ribulose bisphosphate carboxylase large chain, N-terminal domain
PF02790	ATS	Cytochrome C oxidase subunit II, transmembrane domain
PF02798	ATS	Glutathione S-transferase, N-terminal domain
PF02800	ATS	Glyceraldehyde 3-phosphate dehydrogenase, C-terminal domain
PF02801	ATS	Beta-ketoacyl synthase, C-terminal domain
PF02807	ATS	ATP:guanido phosphotransferase, N-terminal domain
PF02823	ATS	ATP synthase, Delta/Epsilon chain, beta-sandwich domain
PF02852	ATS	Pyridine nucleotide-disulphide oxidoreductase, dimerisation domain
PF02861	ATS	Clp amino terminal domain, pathogenicity island component
PF02867	ATS	Ribonucleotide reductase, barrel domain
PF02874	ATS	ATP synthase alpha/beta family, beta-barrel domain
PF02887	ATS	Pyruvate kinase, alpha/beta domain
PF02889	ATS	Sec63 Brl domain
PF02933	ATS	Cell division protein 48 (CDC48), domain 2
PF02990	ATS	Endomembrane protein 70
PF02991	ATS	Autophagy protein Atg8 ubiquitin like
PF03028	ATS	Dynein heavy chain region D6 P-loop domain
PF03030	ATS	Inorganic H+ pyrophosphatase
PF03060	ATS	Nitronate monooxygenase
PF03067	ATS	Lytic polysaccharide mono-oxygenase, cellulose-degrading
PF03109	ATS	ABC1 atypical kinase-like domain
PF03118	ATS	Bacterial RNA polymerase, alpha chain C terminal domain
PF03129	ATS	Anticodon binding domain
PF03143	ATS	Elongation factor Tu C-terminal domain
PF03144	ATS	Elongation factor Tu domain 2
PF03151	ATS	Triose-phosphate Transporter family
PF03160	ATS	Calx-beta domain
PF03177	ATS	Non-repetitive/WGA-negative nucleoporin C-terminal
PF03229	ATS	Alphavirus glycoprotein J
PF03348	ATS	Serine incorporator (Serinc)
PF03382	ATS	Mycoplasma protein of unknown function, DUF285
PF03404	ATS	Mo-co oxidoreductase dimerisation domain
PF03405	ATS	Fatty acid desaturase
PF03407	ATS	Nucleotide-diphospho-sugar transferase
PF03463	ATS	eRF1 domain 1
PF03464	ATS	eRF1 domain 2
PF03465	ATS	eRF1 domain 3
PF03567	ATS	Sulfotransferase family
PF03604	ATS	DNA directed RNA polymerase, 7 kDa subunit
PF03720	ATS	UDP-glucose/GDP-mannose dehydrogenase family, UDP binding domain
PF03721	ATS	UDP-glucose/GDP-mannose dehydrogenase family, NAD binding domain
PF03764	ATS	Elongation factor G, domain IV
PF03911	ATS	Sec61beta family
PF03952	ATS	Enolase, N-terminal domain
PF04142	ATS	Nucleotide-sugar transporter
PF04408	ATS	Helicase associated domain (HA2), winged-helix
PF04451	ATS	Large eukaryotic DNA virus major capsid protein
PF04539	ATS	Sigma-70 region 3
PF04542	ATS	Sigma-70 region 2
PF04545	ATS	Sigma-70, region 4
PF04560	ATS	RNA polymerase Rpb2, domain 7
PF04561	ATS	RNA polymerase Rpb2, domain 2
PF04563	ATS	RNA polymerase beta subunit
PF04564	ATS	U-box domain
PF04565	ATS	RNA polymerase Rpb2, domain 3
PF04690	ATS	YABBY protein
PF04749	ATS	PLAC8 family
PF04898	ATS	Glutamate synthase central domain
PF04983	ATS	RNA polymerase Rpb1, domain 3
PF04997	ATS	RNA polymerase Rpb1, domain 1
PF04998	ATS	RNA polymerase Rpb1, domain 5
PF05000	ATS	RNA polymerase Rpb1, domain 4
PF05018	ATS	CFA20 domain
PF05151	ATS	Photosystem II reaction centre M protein (PsbM)
PF05186	ATS	Dpy-30 motif
PF05191	ATS	Adenylate kinase, active site lid
PF05221	ATS	S-adenosyl-L-homocysteine hydrolase
PF05690	ATS	Thiazole biosynthesis protein ThiG
PF05721	ATS	Phytanoyl-CoA dioxygenase (PhyH)
PF05757	ATS	Oxygen evolving enhancer protein 3 (PsbQ)
PF06068	ATS	TIP49 P-loop domain
PF06514	ATS	Photosystem II 12 kDa extrinsic protein (PsbU)
PF06799	ATS	Conserved in the green lineage and diatoms 27
PF06868	ATS	Protein of unknown function (DUF1257)
PF07479	ATS	NAD-dependent glycerol-3-phosphate dehydrogenase C-terminus
PF07683	ATS	Cobalamin synthesis protein cobW C-terminal domain
PF07690	ATS	Major Facilitator Superfamily
PF07692	ATS	Low iron-inducible periplasmic protein
PF07699	ATS	Tyrosine-protein kinase ephrin type A/B receptor-like
PF07717	ATS	Oligonucleotide/oligosaccharide-binding (OB)-fold
PF07724	ATS	AAA domain (Cdc48 subfamily)
PF07977	ATS	FabA-like domain
PF07992	ATS	Pyridine nucleotide-disulphide oxidoreductase
PF07993	ATS	Male sterility protein
PF08071	ATS	RS4NT (NUC023) domain
PF08082	ATS	PRO8NT (NUC069), PrP8 N-terminal domain
PF08083	ATS	PROCN (NUC071) domain
PF08084	ATS	PROCT (NUC072) domain
PF08240	ATS	Alcohol dehydrogenase GroES-like domain
PF08246	ATS	Cathepsin propeptide inhibitor domain (I29)
PF08276	ATS	PAN-like domain
PF08282	ATS	haloacid dehalogenase-like hydrolase
PF08321	ATS	PPP5 TPR repeat region
PF08393	ATS	Dynein heavy chain, N-terminal region 2
PF08449	ATS	UAA transporter family
PF08547	ATS	Complex I intermediate-associated protein 30 (CIA30)
PF08659	ATS	KR domain
PF08802	ATS	CytB6-F_Fe-S
PF09111	ATS	SLIDE
PF09206	ATS	Alpha-L-arabinofuranosidase B, catalytic
PF09268	ATS	Clathrin, heavy-chain linker
PF09336	ATS	Vps4 C terminal oligomerisation domain
PF10184	ATS	Uncharacterized conserved protein (DUF2358)
PF10274	ATS	Parkin co-regulated protein
PF10431	ATS	C-terminal, D2-small domain, of ClpB protein
PF10557	ATS	Cullin protein neddylation domain
PF10563	ATS	Delta carbonic anhydrase
PF10584	ATS	Proteasome subunit A N-terminal signature
PF10596	ATS	U6-snRNA interacting domain of PrP8
PF10597	ATS	U5-snRNA binding site 2 of PrP8
PF10598	ATS	RNA recognition motif of the spliceosomal PrP8
PF11175	ATS	Protein of unknown function (DUF2961)
PF11496	ATS	Class II histone deacetylase complex subunits 2 and 3
PF11913	ATS	Protein of unknown function (DUF3431)
PF11965	ATS	Domain of unknown function (DUF3479)
PF12134	ATS	PRP8 domain IV core
PF12159	ATS	Protein of unknown function (DUF3593)
PF12436	ATS	ICP0-binding domain of Ubiquitin-specific protease 7
PF12437	ATS	Glutamine synthetase type III N terminal
PF12521	ATS	Protein of unknown function (DUF3724)
PF12698	ATS	ABC-2 family transporter protein
PF12724	ATS	Flavodoxin domain
PF12775	ATS	P-loop containing dynein motor region
PF12777	ATS	Microtubule-binding stalk of dynein motor
PF12780	ATS	P-loop containing dynein motor region D4
PF12781	ATS	ATP-binding dynein motor region
PF12796	ATS	Ankyrin repeats (3 copies)
PF12838	ATS	4Fe-4S dicluster domain
PF12906	ATS	RING-variant domain
PF13085	ATS	2Fe-2S iron-sulfur cluster binding domain
PF13191	ATS	AAA ATPase domain
PF13202	ATS	EF hand
PF13237	ATS	4Fe-4S dicluster domain
PF13246	ATS	Cation transport ATPase (P-type)
PF13374	ATS	Tetratricopeptide repeat
PF13385	ATS	Concanavalin A-like lectin/glucanases superfamily
PF13405	ATS	EF-hand domain
PF13414	ATS	TPR repeat
PF13417	ATS	Glutathione S-transferase, N-terminal domain
PF13418	ATS	Galactose oxidase, central domain
PF13424	ATS	Tetratricopeptide repeat
PF13431	ATS	Tetratricopeptide repeat
PF13432	ATS	Tetratricopeptide repeat
PF13442	ATS	Cytochrome C oxidase, cbb3-type, subunit III
PF13450	ATS	NAD(P)-binding Rossmann-like domain
PF13458	ATS	Periplasmic binding protein
PF13460	ATS	NAD(P)H-binding
PF13469	ATS	Sulfotransferase family
PF13499	ATS	EF-hand domain pair
PF13516	ATS	Leucine Rich repeat
PF13517	ATS	FG-GAP-like repeat
PF13519	ATS	von Willebrand factor type A domain
PF13522	ATS	Glutamine amidotransferase domain
PF13534	ATS	4Fe-4S dicluster domain
PF13561	ATS	Enoyl-(Acyl carrier protein) reductase
PF13589	ATS	Histidine kinase-, DNA gyrase B-, and HSP90-like ATPase
PF13598	ATS	Domain of unknown function (DUF4139)
PF13602	ATS	Zinc-binding dehydrogenase
PF13637	ATS	Ankyrin repeats (many copies)
PF13639	ATS	Ring finger domain
PF13676	ATS	TIR domain
PF13806	ATS	Rieske-like [2Fe-2S] domain
PF13812	ATS	Pentatricopeptide repeat domain
PF13833	ATS	EF-hand domain pair
PF13838	ATS	Clathrin-H-link
PF13848	ATS	Thioredoxin-like domain
PF13857	ATS	Ankyrin repeats (many copies)
PF13893	ATS	RNA recognition motif. (a.k.a. RRM, RBD, or RNP domain)
PF13905	ATS	Thioredoxin-like
PF13921	ATS	Myb-like DNA-binding domain
PF14204	ATS	Ribosomal L18 C-terminal region
PF14295	ATS	PAN domain
PF14306	ATS	PUA-like domain
PF14312	ATS	FG-GAP repeat
PF14492	ATS	Elongation Factor G, domain III
PF14495	ATS	Cytochrome c-550 domain
PF14497	ATS	Glutathione S-transferase, C-terminal domain
PF14533	ATS	Ubiquitin-specific protease C-terminal
PF14551	ATS	MCM N-terminal domain
PF14560	ATS	Ubiquitin-like domain
PF14765	ATS	Polyketide synthase dehydratase N-terminal domain
PF14779	ATS	Ciliary BBSome complex subunit 1
PF14870	ATS	Photosynthesis system II assembly factor YCF48
PF14974	ATS	Protein C10
PF00051	AT	Kringle domain
PF00188	AT	Cysteine-rich secretory protein family
PF00202	AT	Aminotransferase class-III
PF00213	AT	ATP synthase delta (OSCP) subunit
PF00246	AT	Zinc carboxypeptidase
PF00326	AT	Prolyl oligopeptidase family
PF00344	AT	SecY
PF00361	AT	Proton-conducting membrane transporter
PF00430	AT	ATP synthase B/B' CF(0)
PF00510	AT	Cytochrome c oxidase subunit III
PF00553	AT	Cellulose binding domain
PF00595	AT	PDZ domain
PF00676	AT	Dehydrogenase E1 component
PF00809	AT	Pterin binding enzyme
PF00850	AT	Histone deacetylase domain
PF01015	AT	Ribosomal S3Ae family
PF01027	AT	Inhibitor of apoptosis-promoting Bax1
PF01129	AT	NAD:arginine ADP-ribosyltransferase
PF01217	AT	Clathrin adaptor complex small chain
PF01218	AT	Coproporphyrinogen III oxidase
PF01226	AT	Formate/nitrite transporter
PF01262	AT	Alanine dehydrogenase/PNT, C-terminal domain
PF01293	AT	Phosphoenolpyruvate carboxykinase
PF01450	AT	Acetohydroxy acid isomeroreductase, catalytic domain
PF01607	AT	Chitin binding Peritrophin-A domain
PF01776	AT	Ribosomal L22e protein family
PF02167	AT	Cytochrome C1 family
PF02201	AT	SWIB/MDM2 domain
PF02233	AT	NAD(P) transhydrogenase beta subunit
PF02298	AT	Plastocyanin-like domain
PF02310	AT	B12 binding domain
PF02574	AT	Homocysteine S-methyltransferase
PF02607	AT	B12 binding domain
PF02668	AT	Taurine catabolism dioxygenase TauD, TfdA family
PF02809	AT	Ubiquitin interaction motif
PF02894	AT	Oxidoreductase family, C-terminal alpha/beta domain
PF02965	AT	Vitamin B12 dependent methionine synthase, activation domain
PF02985	AT	HEAT repeat
PF03092	AT	BT1 family
PF03171	AT	2OG-Fe(II) oxygenase superfamily
PF03372	AT	Endonuclease/Exonuclease/phosphatase family
PF03501	AT	Plectin/S10 domain
PF03953	AT	Tubulin C-terminal domain
PF03971	AT	Monomeric isocitrate dehydrogenase
PF04073	AT	Aminoacyl-tRNA editing domain
PF04566	AT	RNA polymerase Rpb2, domain 4
PF04567	AT	RNA polymerase Rpb2, domain 5
PF04801	AT	RPC5 protein
PF04992	AT	RNA polymerase Rpb1, domain 6
PF05222	AT	Alanine dehydrogenase/PNT, N-terminal domain
PF05405	AT	Mitochondrial ATP synthase B chain precursor (ATP-synt_B)
PF05478	AT	Prominin
PF05787	AT	Alkaline phosphatase PhoX
PF05969	AT	Photosystem II complex subunit Ycf12
PF06455	AT	NADH dehydrogenase subunit 5 C-terminus
PF07137	AT	VDE lipocalin domain
PF07645	AT	Calcium-binding EGF domain
PF07681	AT	DoxX
PF07991	AT	Acetohydroxy acid isomeroreductase, NADPH-binding domain
PF08450	AT	SMP-30/Gluconolactonase/LRE-like region
PF08534	AT	Redoxin
PF08662	AT	Eukaryotic translation initiation factor eIF2A
PF09180	AT	Prolyl-tRNA synthetase, C-terminal
PF10208	AT	ARMET, C-terminal
PF10282	AT	Lactonase, 7-bladed beta-propeller
PF10508	AT	Proteasome non-ATPase 26S subunit
PF10559	AT	Plug domain of Sec61p
PF11969	AT	Scavenger mRNA decapping enzyme C-term binding
PF12769	AT	4TM region of pyridine nucleotide transhydrogenase, mitoch
PF13012	AT	Maintenance of mitochondrial structure and function
PF13041	AT	PPR repeat family
PF13180	AT	PDZ domain
PF13631	AT	Cytochrome b(N-terminal)/b6/petB
PF13640	AT	2OG-Fe(II) oxygenase superfamily
PF13646	AT	HEAT repeats
PF13851	AT	Growth-arrest specific micro-tubule binding
PF15138	AT	Syncollin
PF00034	AS	Cytochrome c
PF00050	AS	Kazal-type serine protease inhibitor domain
PF00066	AS	LNR domain
PF00107	AS	Zinc-binding dehydrogenase
PF00268	AS	Ribonucleotide reductase, small chain
PF00284	AS	Lumenal portion of Cytochrome b559, alpha (gene psbE) subunit
PF00301	AS	Rubredoxin
PF00462	AS	Glutaredoxin
PF00642	AS	Zinc finger C-x8-C-x5-C-x3-H type (and similar)
PF00673	AS	ribosomal L5P family C-terminus
PF00685	AS	Sulfotransferase domain
PF00737	AS	Photosystem II 10 kDa phosphoprotein
PF00743	AS	Flavin-binding monooxygenase-like
PF00805	AS	Pentapeptide repeats (8 copies)
PF00830	AS	Ribosomal L28 family
PF00831	AS	Ribosomal L29 protein
PF00856	AS	SET domain
PF00889	AS	Elongation factor TS
PF01079	AS	Hint module
PF01177	AS	Asp/Glu/Hydantoin racemase
PF01182	AS	Glucosamine-6-phosphate isomerases/6-phosphogluconolactonase
PF01381	AS	Helix-turn-helix
PF01423	AS	LSM domain
PF01459	AS	Eukaryotic porin
PF01701	AS	Photosystem I reaction centre subunit IX / PsaJ
PF01789	AS	PsbP
PF01805	AS	Surp module
PF02012	AS	BNR/Asp-box repeat
PF02533	AS	Photosystem II 4 kDa reaction centre component
PF03403	AS	Platelet-activating factor acetylhydrolase, isoform II
PF03660	AS	PHF5-like protein
PF03713	AS	Domain of unknown function (DUF305)
PF03742	AS	PetN
PF03840	AS	Preprotein translocase SecG subunit
PF04030	AS	D-arabinono-1,4-lactone oxidase
PF05419	AS	GUN4-like
PF05990	AS	Alpha/beta hydrolase of unknown function (DUF900)
PF06468	AS	Spondin_N
PF06522	AS	NADH-ubiquinone reductase complex 1 MLRQ subunit
PF06549	AS	Protein of unknown function (DUF1118)
PF07478	AS	D-ala D-ala ligase C-terminus
PF07648	AS	Kazal-type serine protease inhibitor domain
PF07650	AS	KH domain
PF07749	AS	Endoplasmic reticulum protein ERp29, C-terminal domain
PF07885	AS	Ion channel
PF07912	AS	ERp29, N-terminal domain
PF08041	AS	PetM family of cytochrome b6f complex subunit 7
PF08238	AS	Sel1 repeat
PF08523	AS	Multiprotein bridging factor 1
PF08707	AS	Primase C terminal 2 (PriCT-2)
PF09084	AS	NMT1/THI5 like
PF10262	AS	Rdx family
PF10354	AS	rRNA (uridine-N3-)-methyltransferase BTM5-like
PF11360	AS	Protein of unknown function (DUF3110)
PF11976	AS	Ubiquitin-2 like Rad60 SUMO-like
PF12230	AS	Pre-mRNA splicing factor PRP21 like protein
PF12695	AS	Alpha/beta hydrolase family
PF12740	AS	Cutinase
PF12799	AS	Leucine Rich repeats (2 copies)
PF13574	AS	Metallo-peptidase family M12B Reprolysin-like
PF13917	AS	Zinc knuckle
PF14392	AS	Zinc knuckle
PF00072	TS	Response regulator receiver domain
PF00078	TS	Reverse transcriptase (RNA-dependent DNA polymerase)
PF00083	TS	Sugar (and other) transporter
PF00117	TS	Glutamine amidotransferase class-I
PF00132	TS	Bacterial transferase hexapeptide (six repeats)
PF00133	TS	tRNA synthetases class I (I, L, M and V)
PF00170	TS	bZIP transcription factor
PF00187	TS	Chitin recognition protein
PF00208	TS	Glutamate/Leucine/Phenylalanine/Valine dehydrogenase
PF00291	TS	Pyridoxal-phosphate dependent enzyme
PF00330	TS	Aconitase family (aconitate hydratase)
PF00335	TS	Tetraspanin family
PF00348	TS	Polyprenyl synthetase
PF00387	TS	Phosphatidylinositol-specific phospholipase C, Y domain
PF00403	TS	Heavy-metal-associated domain
PF00413	TS	Matrixin
PF00454	TS	Phosphatidylinositol 3- and 4-kinase
PF00463	TS	Isocitrate lyase family
PF00494	TS	Squalene/phytoene synthase
PF00515	TS	Tetratricopeptide repeat
PF00530	TS	Scavenger receptor cysteine-rich domain
PF00536	TS	SAM domain (Sterile alpha motif)
PF00612	TS	IQ calmodulin-binding motif
PF00651	TS	BTB/POZ domain
PF00668	TS	Condensation domain
PF00684	TS	DnaJ central domain
PF00696	TS	Amino acid kinase family
PF00704	TS	Glycosyl hydrolases family 18
PF00742	TS	Homoserine dehydrogenase
PF00762	TS	Ferrochelatase
PF00899	TS	ThiF family
PF00926	TS	3,4-dihydroxy-2-butanone 4-phosphate synthase
PF00988	TS	Carbamoyl-phosphate synthase small chain, CPSase domain
PF00999	TS	Sodium/hydrogen exchanger family
PF01039	TS	Carboxyl transferase domain
PF01043	TS	SecA preprotein cross-linking domain
PF01077	TS	Nitrite and sulphite reductase 4Fe-4S domain
PF01274	TS	Malate synthase, TIM barrel domain
PF01344	TS	Kelch motif
PF01391	TS	Collagen triple helix repeat (20 copies)
PF01399	TS	PCI domain
PF01457	TS	Leishmanolysin
PF01512	TS	Respiratory-chain NADH dehydrogenase 51 Kd subunit
PF01565	TS	FAD binding domain
PF01593	TS	Flavin containing amine oxidoreductase
PF01764	TS	Lipase (class 3)
PF01786	TS	Alternative oxidase
PF01798	TS	snoRNA binding domain, fibrillarin
PF01825	TS	GPCR proteolysis site, GPS, motif
PF01833	TS	IPT/TIG domain
PF02028	TS	BCCT, betaine/carnitine/choline family transporter
PF02134	TS	UBACT
PF02135	TS	TAZ zinc finger
PF02142	TS	MGS-like domain
PF02190	TS	ATP-dependent protease La (LON) substrate-binding domain
PF02453	TS	Reticulon
PF02518	TS	Histidine kinase-, DNA gyrase B-, and HSP90-like ATPase
PF02548	TS	Ketopantoate hydroxymethyltransferase
PF02569	TS	Pantoate-beta-alanine ligase
PF02787	TS	Carbamoyl-phosphate synthetase large chain, oligomerisation domain
PF02812	TS	Glu/Leu/Phe/Val dehydrogenase, dimerisation domain
PF02866	TS	lactate/malate dehydrogenase, alpha/beta C-terminal domain
PF03016	TS	Exostosin family
PF03074	TS	Glutamate-cysteine ligase
PF03133	TS	Tubulin-tyrosine ligase family
PF03275	TS	UDP-galactopyranose mutase
PF03447	TS	Homoserine dehydrogenase, NAD binding domain
PF03460	TS	Nitrite/Sulfite reductase ferredoxin-like half domain
PF03639	TS	Glycosyl hydrolase family 81 N-terminal domain
PF03737	TS	Aldolase/RraA
PF04072	TS	Leucine carboxyl methyltransferase
PF04117	TS	Mpv17 / PMP22 family
PF04232	TS	Stage V sporulation protein S (SpoVS)
PF04515	TS	Plasma-membrane choline transporter
PF04551	TS	GcpE protein
PF04607	TS	Region found in RelA / SpoT proteins
PF04610	TS	TrbL/VirB6 plasmid conjugal transfer protein
PF04615	TS	Utp14 protein
PF04886	TS	PT repeat
PF05193	TS	Peptidase M16 inactive domain
PF05362	TS	Lon protease (S16) C-terminal proteolytic domain
PF05368	TS	NmrA-like family
PF05496	TS	Holliday junction DNA helicase RuvB P-loop domain
PF05499	TS	DNA methyltransferase 1-associated protein 1 (DMAP1)
PF05890	TS	Eukaryotic rRNA processing protein EBP2
PF06434	TS	Aconitate hydratase 2 N-terminus
PF06565	TS	DM10 domain
PF06624	TS	Ribosome associated membrane protein RAMP4
PF07516	TS	SecA Wing and Scaffold domain
PF07517	TS	SecA DEAD-like domain
PF07647	TS	SAM domain (Sterile alpha motif)
PF07671	TS	Protein of unknown function (DUF1601)
PF07707	TS	BTB And C-terminal Kelch
PF07714	TS	Protein tyrosine and serine/threonine kinase
PF07728	TS	AAA domain (dynein-related subfamily)
PF08060	TS	NOSIC
PF08151	TS	FerI (NUC094) domain
PF08156	TS	NOP5NT (NUC127) domain
PF08214	TS	Histone acetylation protein
PF08264	TS	Anticodon-binding domain of tRNA ligase
PF08298	TS	PrkA AAA domain
PF08326	TS	Acetyl-CoA carboxylase, central region
PF08367	TS	Peptidase M16C associated
PF08385	TS	Dynein heavy chain, N-terminal region 1
PF08646	TS	Replication factor-A C terminal domain
PF09286	TS	Pro-kumamolisin, activation domain
PF09358	TS	Ubiquitin fold domain
PF09409	TS	PUB domain
PF10458	TS	Valyl tRNA synthetase tRNA binding arm
PF10531	TS	SLBB domain
PF10585	TS	Ubiquitin-activating enzyme, SCCH domain
PF10589	TS	NADH-ubiquinone oxidoreductase-F iron-sulfur binding region
PF11443	TS	Domain of unknown function (DUF2828)
PF11791	TS	Aconitate B N-terminal domain
PF12327	TS	FtsZ family, C-terminal domain
PF12697	TS	Alpha/beta hydrolase family
PF12774	TS	Hydrolytic ATP binding site of dynein motor region
PF12848	TS	ABC transporter
PF12937	TS	F-box-like
PF13181	TS	Tetratricopeptide repeat
PF13193	TS	AMP-binding enzyme C-terminal domain
PF13229	TS	Right handed beta helix region
PF13292	TS	1-deoxy-D-xylulose-5-phosphate synthase
PF13304	TS	AAA domain, putative AbiEii toxin, Type IV TA system
PF13371	TS	Tetratricopeptide repeat
PF13410	TS	Glutathione S-transferase, C-terminal domain
PF13415	TS	Galactose oxidase, central domain
PF13426	TS	PAS domain
PF13535	TS	ATP-grasp domain
PF13738	TS	Pyridine nucleotide-disulphide oxidoreductase
PF13745	TS	HxxPF_rpt
PF13768	TS	von Willebrand factor type A domain
PF13840	TS	ACT domain
PF13854	TS	Kelch motif
PF13920	TS	Zinc finger, C3HC4 type (RING finger)
PF00033	A	Cytochrome b/b6/petB
PF00081	A	Iron/manganese superoxide dismutases, alpha-hairpin domain
PF00090	A	Thrombospondin type 1 domain
PF00146	A	NADH dehydrogenase
PF00230	A	Major intrinsic protein
PF00241	A	Cofilin/tropomyosin-type actin-binding protein
PF00370	A	FGGY family of carbohydrate kinases, N-terminal domain
PF00389	A	D-isomer specific 2-hydroxyacid dehydrogenase, catalytic domain
PF00420	A	NADH-ubiquinone/plastoquinone oxidoreductase chain 4L
PF00431	A	CUB domain
PF00496	A	Bacterial extracellular solute-binding proteins, family 5 Middle
PF00499	A	NADH-ubiquinone/plastoquinone oxidoreductase chain 6
PF00507	A	NADH-ubiquinone/plastoquinone oxidoreductase, chain 3
PF00538	A	linker histone H1 and H5 family
PF00639	A	PPIC-type PPIASE domain
PF00662	A	NADH-Ubiquinone oxidoreductase (complex I), chain 5 N-terminus
PF00692	A	dUTPase
PF00857	A	Isochorismatase family
PF00920	A	Dehydratase family
PF00957	A	Synaptobrevin
PF01012	A	Electron transfer flavoprotein domain
PF01061	A	ABC-2 type transporter
PF01111	A	Cyclin-dependent kinase regulatory subunit
PF01130	A	CD36 family
PF01132	A	Elongation factor P (EF-P) OB domain
PF01151	A	GNS1/SUR4 family
PF01169	A	Uncharacterized protein family UPF0016
PF01176	A	Translation initiation factor 1A / IF-1
PF01215	A	Cytochrome c oxidase subunit Vb
PF01269	A	Fibrillarin
PF01364	A	Peptidase family C25
PF01368	A	DHH family
PF01535	A	PPR repeat
PF01536	A	Adenosylmethionine decarboxylase
PF01564	A	Spermine/spermidine synthase domain
PF01597	A	Glycine cleavage H-protein
PF01722	A	BolA-like protein
PF01778	A	Ribosomal L28e protein family
PF01880	A	Desulfoferrodoxin
PF02136	A	Nuclear transport factor 2 (NTF2) domain
PF02230	A	Phospholipase/Carboxylesterase
PF02274	A	Arginine deiminase
PF02320	A	Ubiquinol-cytochrome C reductase hinge protein
PF02326	A	Plant ATP synthase F0
PF02392	A	Ycf4
PF02416	A	mttA/Hcf106 family
PF02427	A	Photosystem I reaction centre subunit IV / PsaE
PF02777	A	Iron/manganese superoxide dismutases, C-terminal domain
PF02782	A	FGGY family of carbohydrate kinases, C-terminal domain
PF02817	A	e3 binding domain
PF02826	A	D-isomer specific 2-hydroxyacid dehydrogenase, NAD binding domain
PF03024	A	Folate receptor family
PF03179	A	Vacuolar (H+)-ATPase G subunit
PF03215	A	Rad17 P-loop domain
PF03248	A	Rer1 family
PF03358	A	NADPH-dependent FMN reductase
PF03650	A	Mitochondrial pyruvate carriers
PF03896	A	Translocon-associated protein (TRAP), alpha subunit
PF04116	A	Fatty acid hydroxylase
PF04158	A	Sof1-like domain
PF04410	A	Gar1/Naf1 RNA binding region
PF04695	A	Pex14 N-terminal domain
PF05486	A	Signal recognition particle 9 kDa protein (SRP9)
PF05631	A	Sugar-tranasporters, 12 TM
PF05729	A	NACHT domain
PF05899	A	EutQ-like cupin domain
PF06298	A	Photosystem II protein Y (PsbY)
PF06916	A	FAM210A/B-like domain
PF06966	A	Protein of unknown function (DUF1295)
PF07465	A	Photosystem I protein M (PsaM)
PF07676	A	WD40-like Beta Propeller Repeat
PF07679	A	Immunoglobulin I-set domain
PF07691	A	PA14 domain
PF07731	A	Multicopper oxidase
PF07732	A	Multicopper oxidase
PF08126	A	Propeptide_C25
PF08207	A	Elongation factor P (EF-P) KOW-like domain
PF08502	A	LeuA allosteric (dimerisation) domain
PF08542	A	Replication factor C C-terminal domain
PF08771	A	FKBP12-rapamycin binding domain
PF08806	A	Sep15/SelM redox domain
PF09285	A	Elongation factor P, C-terminal
PF09996	A	Uncharacterized protein conserved in bacteria (DUF2237)
PF10503	A	Esterase PHB depolymerase
PF10791	A	Mitochondrial F1-F0 ATP synthase subunit F of fungi
PF10927	A	Protein of unknown function (DUF2738)
PF12689	A	Acid Phosphatase
PF12707	A	Protein of unknown function (DUF3804)
PF13177	A	DNA polymerase III, delta subunit
PF13774	A	Regulated-SNARE-like domain
PF14215	A	bHLH-MYC and R2R3-MYB transcription factors N-terminal
PF14252	A	Domain of unknown function (DUF4347)
PF14432	A	DYW family of nucleic acid deaminases
PF14933	A	CEP19-like protein
PF00008	T	EGF-like domain
PF00010	T	Helix-loop-helix DNA-binding domain
PF00013	T	KH domain
PF00030	T	Beta/Gamma crystallin
PF00056	T	lactate/malate dehydrogenase, NAD binding domain
PF00086	T	Thyroglobulin type-1 repeat
PF00097	T	Zinc finger, C3HC4 type (RING finger)
PF00108	T	Thiolase, N-terminal domain
PF00128	T	Alpha amylase, catalytic domain
PF00134	T	Cyclin, N-terminal domain
PF00152	T	tRNA synthetases class II (D, K and N)
PF00156	T	Phosphoribosyl transferase domain
PF00171	T	Aldehyde dehydrogenase family
PF00185	T	Aspartate/ornithine carbamoyltransferase, Asp/Orn binding domain
PF00194	T	Eukaryotic-type carbonic anhydrase
PF00278	T	Pyridoxal-dependent decarboxylase, C-terminal sheet domain
PF00305	T	Lipoxygenase
PF00307	T	Calponin homology (CH) domain
PF00328	T	Histidine phosphatase superfamily (branch 2)
PF00346	T	Respiratory-chain NADH dehydrogenase, 49 Kd subunit
PF00353	T	RTX calcium-binding nonapeptide repeat (4 copies)
PF00378	T	Enoyl-CoA hydratase/isomerase
PF00384	T	Molybdopterin oxidoreductase
PF00390	T	Malic enzyme, N-terminal domain
PF00408	T	Phosphoglucomutase/phosphomannomutase, C-terminal domain
PF00415	T	Regulator of chromosome condensation (RCC1) repeat
PF00433	T	Protein kinase C terminal domain
PF00435	T	Spectrin repeat
PF00441	T	Acyl-CoA dehydrogenase, C-terminal domain
PF00458	T	WHEP-TRS domain
PF00465	T	Iron-containing alcohol dehydrogenase
PF00475	T	Imidazoleglycerol-phosphate dehydratase
PF00476	T	DNA polymerase family A
PF00479	T	Glucose-6-phosphate dehydrogenase, NAD binding domain
PF00490	T	Delta-aminolevulinic acid dehydratase
PF00512	T	His Kinase A (phospho-acceptor) domain
PF00557	T	Metallopeptidase family M24
PF00585	T	C-terminal regulatory domain of Threonine dehydratase
PF00615	T	Regulator of G protein signaling domain
PF00622	T	SPRY domain
PF00632	T	HECT-domain (ubiquitin-transferase)
PF00635	T	MSP (Major sperm protein) domain
PF00648	T	Calpain family cysteine protease
PF00652	T	Ricin-type beta-trefoil lectin domain
PF00694	T	Aconitase C-terminal domain
PF00709	T	Adenylosuccinate synthetase
PF00725	T	3-hydroxyacyl-CoA dehydrogenase, C-terminal domain
PF00733	T	Asparagine synthase
PF00787	T	PX domain
PF00806	T	Pumilio-family RNA binding repeat
PF00890	T	FAD binding domain
PF00925	T	GTP cyclohydrolase II
PF00928	T	Adaptor complexes medium subunit family
PF00933	T	Glycosyl hydrolase family 3 N terminal domain
PF00963	T	Cohesin domain
PF00975	T	Thioesterase domain
PF00982	T	Glycosyltransferase family 20
PF00989	T	PAS fold
PF01040	T	UbiA prenyltransferase family
PF01041	T	DegT/DnrJ/EryC1/StrS aminotransferase family
PF01063	T	Amino-transferase class IV
PF01067	T	Calpain large subunit, domain III
PF01070	T	FMN-dependent dehydrogenase
PF01074	T	Glycosyl hydrolases family 38 N-terminal domain
PF01078	T	Magnesium chelatase, subunit ChlI
PF01094	T	Receptor family ligand binding region
PF01209	T	ubiE/COQ5 methyltransferase family
PF01261	T	Xylose isomerase-like TIM barrel
PF01326	T	Pyruvate phosphate dikinase, AMP/ATP-binding domain
PF01336	T	OB-fold nucleic acid binding domain
PF01343	T	Peptidase family S49
PF01363	T	FYVE zinc finger
PF01369	T	Sec7 domain
PF01379	T	Porphobilinogen deaminase, dipyromethane cofactor binding domain
PF01384	T	Phosphate transporter family
PF01411	T	tRNA synthetases class II (A)
PF01424	T	R3H domain
PF01432	T	Peptidase family M3
PF01433	T	Peptidase family M1 domain
PF01435	T	Peptidase family M48
PF01480	T	PWI domain
PF01488	T	Shikimate / quinate 5-dehydrogenase
PF01496	T	V-type ATPase 116kDa subunit family
PF01532	T	Glycosyl hydrolase family 47
PF01554	T	MatE
PF01591	T	6-phosphofructo-2-kinase
PF01592	T	NifU-like N terminal domain
PF01594	T	AI-2E family transporter
PF01602	T	Adaptin N terminal region
PF01603	T	Protein phosphatase 2A regulatory B subunit (B56 family)
PF01612	T	3'-5' exonuclease
PF01627	T	Hpt domain
PF01704	T	UTP--glucose-1-phosphate uridylyltransferase
PF01749	T	Importin beta binding domain
PF01755	T	Glycosyltransferase family 25 (LPS biosynthesis protein)
PF01758	T	Sodium Bile acid symporter family
PF01794	T	Ferric reductase like transmembrane component
PF01808	T	AICARFT/IMPCHase bienzyme
PF01813	T	ATP synthase subunit D
PF01841	T	Transglutaminase-like superfamily
PF01851	T	Proteasome/cyclosome repeat
PF01852	T	START domain
PF01873	T	Domain found in IF2B/IF5
PF01925	T	Sulfite exporter TauE/SafE
PF01926	T	50S ribosome-binding GTPase
PF02020	T	eIF4-gamma/eIF5/eIF2-epsilon
PF02037	T	SAP domain
PF02077	T	SURF4 family
PF02148	T	Zn-finger in ubiquitin-hydrolases and other protein
PF02181	T	Formin Homology 2 Domain
PF02263	T	Guanylate-binding protein, N-terminal domain
PF02272	T	DHHA1 domain
PF02347	T	Glycine cleavage system P-protein
PF02358	T	Trehalose-phosphatase
PF02364	T	1,3-beta-glucan synthase component
PF02373	T	JmjC domain, hydroxylase
PF02493	T	MORN repeat
PF02515	T	CoA-transferase family III
PF02615	T	Malate/L-lactate dehydrogenase
PF02670	T	1-deoxy-D-xylulose 5-phosphate reductoisomerase
PF02671	T	Paired amphipathic helix repeat
PF02690	T	Na+/Pi-cotransporter
PF02729	T	Aspartate/ornithine carbamoyltransferase, carbamoyl-P binding domain
PF02737	T	3-hydroxyacyl-CoA dehydrogenase, NAD binding domain
PF02754	T	Cysteine-rich domain
PF02770	T	Acyl-CoA dehydrogenase, middle domain
PF02771	T	Acyl-CoA dehydrogenase, N-terminal domain
PF02781	T	Glucose-6-phosphate dehydrogenase, C-terminal domain
PF02784	T	Pyridoxal-dependent decarboxylase, pyridoxal binding domain
PF02847	T	MA3 domain
PF02854	T	MIF4G domain
PF02872	T	5'-nucleotidase, C-terminal domain
PF02878	T	Phosphoglucomutase/phosphomannomutase, alpha/beta/alpha domain I
PF02879	T	Phosphoglucomutase/phosphomannomutase, alpha/beta/alpha domain II
PF02880	T	Phosphoglucomutase/phosphomannomutase, alpha/beta/alpha domain III
PF02893	T	GRAM domain
PF02897	T	Prolyl oligopeptidase, N-terminal beta-propeller domain
PF02910	T	Fumarate reductase flavoprotein C-term
PF02913	T	FAD linked oxidases, C-terminal domain
PF02984	T	Cyclin, C-terminal domain
PF03031	T	NLI interacting factor-like phosphatase
PF03159	T	XRN 5'-3' exonuclease N-terminus
PF03224	T	V-ATPase subunit H
PF03357	T	Snf7
PF03398	T	Regulator of Vps4 activity in the MVB pathway
PF03810	T	Importin-beta N-terminal domain
PF03836	T	RasGAP C-terminus
PF03900	T	Porphobilinogen deaminase, C-terminal domain
PF03917	T	Eukaryotic glutathione synthase, ATP binding domain
PF03920	T	Groucho/TLE N-terminal Q-rich domain
PF03949	T	Malic enzyme, NAD binding domain
PF03959	T	Serine hydrolase (FSH1)
PF04053	T	Coatomer WD associated region
PF04054	T	CCR4-Not complex component, Not1
PF04065	T	Not1 N-terminal domain, CCR4-Not complex component
PF04137	T	Endoplasmic Reticulum Oxidoreductin 1 (ERO1)
PF04153	T	NOT2/NOT3/NOT5 C-terminal
PF04212	T	MIT (microtubule interacting and transport) domain
PF04548	T	AIG1 family
PF04765	T	TOD1/MUCI70, glycosyltransferase-like domain
PF04810	T	Sec23/Sec24 zinc finger
PF04811	T	Sec23/Sec24 trunk domain
PF04815	T	Sec23/Sec24 helical domain
PF04857	T	CAF1 family ribonuclease
PF04969	T	CS domain
PF05088	T	Bacterial NAD-glutamate dehydrogenase, catalytic domain
PF05153	T	Myo-inositol oxygenase
PF05187	T	Electron transfer flavoprotein-ubiquinone oxidoreductase, 4Fe-4S
PF05201	T	Glutamyl-tRNAGlu reductase, N-terminal domain
PF05383	T	La domain
PF05577	T	Serine carboxypeptidase S28
PF05637	T	galactosyl transferase GMA12/MNN10 family
PF05808	T	Podoplanin
PF06101	T	Vacuolar protein sorting-associated protein 62
PF06367	T	Diaphanous FH3 Domain
PF06427	T	UDP-glucose:Glycoprotein Glucosyltransferase
PF06544	T	Small nuclear ribonucleoprotein Prp3, C-terminal domain
PF06814	T	Lung seven transmembrane receptor
PF06827	T	Zinc finger found in FPG and IleRS
PF06943	T	LSD1 zinc finger
PF06957	T	Coatomer (COPI) alpha subunit C-terminus
PF07304	T	Steroid receptor RNA activator (SRA1)
PF07394	T	Protein of unknown function (DUF1501)
PF07716	T	Basic region leucine zipper
PF07718	T	Coatomer beta C-terminal region
PF07719	T	Tetratricopeptide repeat
PF07748	T	Glycosyl hydrolases family 38 C-terminal domain
PF07859	T	alpha/beta hydrolase fold
PF07915	T	Glucosidase II beta subunit-like protein
PF07973	T	Threonyl and Alanyl tRNA synthetase second additional domain
PF07974	T	EGF-like domain
PF07998	T	Peptidase family M54
PF08016	T	Polycystin cation channel
PF08022	T	FAD-binding domain
PF08030	T	Ferric reductase NAD binding domain
PF08033	T	Sec23/Sec24 beta-sandwich domain
PF08075	T	NOPS (NUC059) domain
PF08123	T	Histone methylation protein DOT1
PF08295	T	Sin3 family co-repressor
PF08309	T	LVIVD repeat
PF08324	T	PUL domain
PF08333	T	Protein of unknown function (DUF1725)
PF08373	T	RAP domain
PF08375	T	Proteasome regulatory subunit C-terminal
PF08389	T	Exportin 1-like protein
PF08436	T	1-deoxy-D-xylulose 5-phosphate reductoisomerase C-terminal domain
PF08448	T	PAS fold
PF08454	T	RyR and IP3R Homology associated
PF08487	T	Vault protein inter-alpha-trypsin domain
PF08512	T	Histone chaperone Rttp106-like, middle domain
PF08557	T	Sphingolipid Delta4-desaturase (DES)
PF08572	T	pre-mRNA processing factor 3 domain
PF08623	T	TATA-binding protein interacting (TIP20)
PF08644	T	FACT complex subunit (SPT16/CDC68)
PF08726	T	Ca2+ insensitive EF hand
PF08740	T	BCS1 N terminal
PF08752	T	Coatomer gamma subunit appendage platform subdomain
PF08767	T	CRM1 C terminal
PF08777	T	RNA binding motif
PF08811	T	Protein of unknown function (DUF1800)
PF08825	T	E2 binding domain
PF08920	T	Splicing factor 3B subunit 1
PF09066	T	Beta2-adaptin appendage, C-terminal sub-domain
PF09070	T	PFU (PLAA family ubiquitin binding)
PF09173	T	Initiation factor eIF2 gamma, C terminal
PF09261	T	Alpha mannosidase middle domain
PF09295	T	ChAPs (Chs5p-Arf1p-binding proteins)
PF09317	T	Acyl-CoA dehydrogenase, C-terminal, bacterial type
PF09324	T	Mon2/Sec7/BIG1-like, HDS
PF09334	T	tRNA synthetases class I (M)
PF09377	T	SBDS protein, domain II
PF09416	T	RNA helicase (UPF2 interacting domain)
PF09766	T	Fms-interacting protein/Thoc5
PF09906	T	Uncharacterized protein conserved in bacteria (DUF2135)
PF10162	T	G8 domain
PF10255	T	RNA polymerase I-associated factor PAF67
PF10408	T	Ubiquitin elongating factor core
PF10588	T	NADH-ubiquinone oxidoreductase-G iron-sulfur binding region
PF11931	T	SF3a60/Prp9 C-terminal
PF11940	T	Domain of unknown function (DUF3458) Ig-like fold
PF12108	T	Splicing factor SF3a60 binding domain
PF12248	T	Farnesoic acid 0-methyl transferase
PF12265	T	Histone-binding protein RBBP4 or subunit C of CAF1 complex
PF12340	T	Protein of unknown function (DUF3638)
PF12359	T	Protein of unknown function (DUF3645)
PF12465	T	Proteasome beta subunits C terminal
PF12471	T	GTP cyclohydrolase N terminal
PF12481	T	Aluminium induced protein
PF12661	T	Human growth factor-like EGF
PF12662	T	Complement Clr-like EGF-like
PF12770	T	CHAT domain
PF12783	T	Mon2/Sec7/BIG1-like, HUS domain
PF12804	T	MobA-like NTP transferase domain
PF12836	T	Helix-hairpin-helix motif
PF12842	T	CCR4-Not complex, Not1 subunit, domain of unknown function DUF3819
PF12931	T	Sec23-binding domain of Sec16
PF12947	T	EGF domain
PF12999	T	Glucosidase II beta subunit-like
PF13086	T	AAA domain
PF13087	T	AAA domain
PF13174	T	Tetratricopeptide repeat
PF13183	T	4Fe-4S dicluster domain
PF13245	T	AAA domain
PF13288	T	DXP reductoisomerase C-terminal domain
PF13297	T	Replication stress response SDE2 C-terminal
PF13365	T	Trypsin-like peptidase domain
PF13398	T	Peptidase M50B-like
PF13428	T	Tetratricopeptide repeat
PF13451	T	Probable zinc-ribbon domain
PF13510	T	2Fe-2S iron-sulfur cluster binding domain
PF13513	T	HEAT-like repeat
PF13520	T	Amino acid permease
PF13537	T	Glutamine amidotransferase domain
PF13540	T	Regulator of chromosome condensation (RCC1) repeat
PF13606	T	Ankyrin repeat
PF13764	T	E3 ubiquitin-protein ligase UBR4
PF13855	T	Leucine rich repeat
PF13868	T	Trichohyalin-plectin-homology domain
PF13881	T	Ubiquitin-2 like Rad60 SUMO-like
PF13923	T	Zinc finger, C3HC4 type (RING finger)
PF14237	T	GYF domain 2
PF14288	T	1,3-beta-glucan synthase subunit FKS1, domain-1
PF14310	T	Fibronectin type III-like domain
PF14555	T	UBA-like domain
PF14559	T	Tetratricopeptide repeat
PF14623	T	Hint-domain
PF14624	T	VWA / Hh protein intein-like
PF14644	T	Domain of unknown function (DUF4456)
PF14646	T	MYCBP-associated protein family
PF14691	T	Dihydroprymidine dehydrogenase domain II, 4Fe-4S cluster
PF14713	T	Domain of unknown function (DUF4464)
PF14806	T	Coatomer beta subunit appendage platform
PF14826	T	FACT complex subunit SPT16 N-terminal lobe domain
PF14843	T	Growth factor receptor domain IV
PF14874	T	Flagellar-associated PapD-like
PF14938	T	Soluble NSF attachment protein, SNAP
PF00166	S	Chaperonin 10 Kd subunit
PF00290	S	Tryptophan synthase alpha chain
PF00294	S	pfkB family carbohydrate kinase
PF00385	S	Chromo (CHRromatin Organisation MOdifier) domain
PF00447	S	HSF-type DNA-binding
PF00459	S	Inositol monophosphatase family
PF00478	S	IMP dehydrogenase / GMP reductase domain
PF00584	S	SecE/Sec61-gamma subunits of protein translocation complex
PF00590	S	Tetrapyrrole (Corrin/Porphyrin) Methylases
PF00734	S	Fungal cellulose binding domain
PF00796	S	Photosystem I reaction centre subunit VIII
PF00885	S	6,7-dimethyl-8-ribityllumazine synthase
PF00916	S	Sulfate permease family
PF01124	S	MAPEG family
PF01126	S	Heme oxygenase
PF01214	S	Casein kinase II regulatory subunit
PF01458	S	SUF system FeS cluster assembly, SufBD
PF01476	S	LysM domain
PF01490	S	Transmembrane amino acid transporter protein
PF01545	S	Cation efflux family
PF01596	S	O-methyltransferase
PF01652	S	Eukaryotic initiation factor 4E
PF01656	S	CobQ/CobB/MinD/ParA nucleotide binding domain
PF01717	S	Cobalamin-independent synthase, Catalytic domain
PF01761	S	3-dehydroquinate synthase
PF01769	S	Divalent cation transporter
PF02219	S	Methylenetetrahydrofolate reductase
PF02353	S	Mycolic acid cyclopropane synthetase
PF02535	S	ZIP Zinc transporter
PF02622	S	Uncharacterized ACR, COG1678
PF02678	S	Pirin
PF02815	S	MIR domain
PF02822	S	Antistasin family
PF02825	S	WWE domain
PF02845	S	CUE domain
PF02921	S	Ubiquinol cytochrome reductase transmembrane region
PF02978	S	Signal peptide binding domain
PF03219	S	TLC ATP/ADP transporter
PF03703	S	Bacterial PH domain
PF03741	S	Integral membrane protein TerC family
PF03824	S	High-affinity nickel-transport protein
PF03992	S	Antibiotic biosynthesis monooxygenase
PF04130	S	Gamma tubulin complex component C-terminal
PF04387	S	Protein tyrosine phosphatase-like protein, PTPLA
PF04824	S	Conserved region of Rad21 / Rec8 like protein
PF04825	S	N terminus of Rad21 / Rec8 like protein
PF04828	S	Glutathione-dependent formaldehyde-activating enzyme
PF05328	S	CybS, succinate dehydrogenase cytochrome B small subunit
PF05542	S	Protein of unknown function (DUF760)
PF05548	S	Gametolysin peptidase M11
PF05726	S	Pirin C-terminal cupin domain
PF06825	S	Heat shock factor binding protein 1
PF07386	S	Protein of unknown function (DUF1499)
PF07466	S	Protein of unknown function (DUF1517)
PF07496	S	CW-type Zinc Finger
PF07766	S	LETM1-like, RBD
PF08031	S	Berberine and berberine like
PF08212	S	Lipocalin-like domain
PF08242	S	Methyltransferase domain
PF08541	S	3-Oxoacyl-[acyl-carrier-protein (ACP)] synthase III C terminal
PF08545	S	3-Oxoacyl-[acyl-carrier-protein (ACP)] synthase III
PF08550	S	Fungal protein of unknown function (DUF1752)
PF08606	S	Prp19/Pso4-like
PF08755	S	Hemimethylated DNA-binding protein YccV like
PF08954	S	Trimerisation motif
PF09011	S	HMG-box domain
PF09320	S	Domain of unknown function (DUF1977)
PF09802	S	Preprotein translocase subunit Sec66
PF10250	S	GDP-fucose protein O-fucosyltransferase
PF10269	S	Transmembrane Fragile-X-F protein
PF10385	S	RNA polymerase beta subunit external 1 domain
PF10462	S	Peptidase M66
PF11016	S	Protein of unknown function (DUF2854)
PF11789	S	Zinc-finger of the MIZ type in Nse subunit
PF11833	S	Protein CHAPERONE-LIKE PROTEIN OF POR1-like
PF11958	S	Domain of unknown function (DUF3472)
PF11999	S	Ice-binding-like
PF12452	S	Protein of unknown function (DUF3685)
PF12847	S	Methyltransferase domain
PF12898	S	Stc1 domain
PF13088	S	BNR repeat-like domain
PF13241	S	Putative NAD(P)-binding
PF13306	S	BspA type Leucine rich repeat region (6 copies)
PF13386	S	Cytochrome C biogenesis protein transmembrane region
PF13409	S	Glutathione S-transferase, N-terminal domain
PF13582	S	Metallo-peptidase family M12B Reprolysin-like
PF13792	S	Sulfate_tra_GLY
PF13948	S	Domain of unknown function (DUF4215)
PF13964	S	Kelch motif
PF14259	S	RRM_6
PF14377	S	Ubiquitin binding region

## Sheet: KW test
Supplementary Table S6: Phaeocystales adaptations in temperate and polar biotopes, continued. Sheet "KW test" lists Pfams testing differentially abundant in pairs of biotopes (Kruskal-Wallis, p-adjusted; one column per comparison). A, Arctic; S, Southern Ocean; T, temperate. Pfams are sorted according to significance groups, where All marks Pfams significantly different in all three comparisons, …
mcl_cluster	meanS	meanA	meanT	p-adj_SA	p-adj_ST	p-adj_AT	significance	desc
PF05496	0.28842	0.0754032	0.636177	6.9316e-07	1.26869e-08	3.31039e-34	All	Holliday junction DNA helicase RuvB P-loop domain
PF01127	0.521948	0.403319	0.0747308	0.000219967	6.31835e-12	3.18085e-06	All	Succinate dehydrogenase/Fumarate reductase transmembrane subunit
PF01125	0.723153	0.203473	0.0733732	2.64228e-06	3.50908e-11	4.08783e-05	All	Pre-mRNA-splicing factor BUD31
PF12770	0.258586	0.0620258	0.679389	3.57559e-09	1.79828e-08	2.48088e-32	All	CHAT domain
PF12774	0.213686	0.0922249	0.694089	1.02641e-05	7.19537e-14	1.84333e-33	All	Hydrolytic ATP binding site of dynein motor region
PF12775	0.222426	0.0931948	0.684379	1.83581e-06	5.62568e-14	4.98995e-34	All	P-loop containing dynein motor region
PF12777	0.22233	0.0908008	0.686869	3.44532e-06	9.6027e-14	4.5842e-34	All	Microtubule-binding stalk of dynein motor
PF12780	0.209897	0.0913265	0.698776	7.41825e-06	4.0457e-14	6.58653e-34	All	P-loop containing dynein motor region D4
PF12781	0.208136	0.0940784	0.697786	1.42041e-05	2.87001e-14	9.18013e-34	All	ATP-binding dynein motor region
PF12783	0.0448288	0.0127261	0.942445	3.97733e-08	7.54996e-17	1.42462e-36	All	Mon2/Sec7/BIG1-like, HUS domain
PF12804	0.185811	0.0790144	0.735174	8.36225e-05	1.01166e-13	1.16968e-33	All	MobA-like NTP transferase domain
PF01067	0.33832	0.0692148	0.592465	1.1069e-08	1.42292e-05	9.67138e-33	All	Calpain large subunit, domain III
PF12830	0.676089	0.0967507	0.22716	2.97673e-09	8.88819e-08	2.16714e-08	All	Sister chromatid cohesion C-terminus
PF03795	0.770202	0.209055	0.0207424	9.10913e-05	4.23713e-14	4.99526e-14	All	YCII-related domain
PF03803	0.664075	0.11209	0.223835	1.15877e-05	3.27689e-05	7.51954e-09	All	Scramblase
PF12894	0.279702	0.150046	0.570248	0.000588612	8.84512e-05	5.7545e-20	All	Anaphase-promoting complex subunit 4 WD40 domain
PF01039	0.281498	0.0895897	0.628912	4.58194e-08	2.59824e-09	6.3311e-35	All	Carboxyl transferase domain
PF12898	0.733518	0.0780711	0.188411	1.01667e-06	9.0959e-06	2.03823e-10	All	Stc1 domain
PF12931	0.267857	0.0436202	0.688522	3.36272e-09	4.88226e-10	7.86521e-35	All	Sec23-binding domain of Sec16
PF01018	0.643059	0.270769	0.0861673	0.000353098	2.55396e-11	6.90859e-07	All	GTP1/OBG
PF12937	0.331566	0.101294	0.56714	1.26411e-06	0.000216652	4.32441e-30	All	F-box-like
PF12947	0.0646934	0.0254919	0.909815	5.29534e-06	9.1756e-16	4.3709e-35	All	EGF domain
PF12999	0.313445	0.0720891	0.614466	5.23237e-08	2.04666e-06	1.66564e-33	All	Glucosidase II beta subunit-like
PF03824	0.670308	0.143207	0.186484	2.82867e-08	7.71961e-10	1.46064e-05	All	High-affinity nickel-transport protein
PF00988	0.319234	0.077839	0.602927	7.71658e-10	0.000209183	3.53925e-33	All	Carbamoyl-phosphate synthase small chain, CPSase domain
PF13087	0.231561	0.11787	0.650569	2.49186e-05	8.2135e-13	1.61346e-33	All	AAA domain
PF00963	0.0666903	0.0301115	0.903197	0.000751808	1.35085e-15	1.76808e-34	All	Cohesin domain
PF00962	0.0734885	0.465077	0.46143	0.000323803	4.185e-13	3.16934e-05	All	Adenosine deaminase
PF00940	0.737789	0.255753	0.00644597	0.000809046	1.75917e-22	6.01084e-29	All	DNA-dependent RNA polymerase
PF07517	0.453621	0.0835131	0.462866	3.32205e-09	1.04345e-05	5.63237e-34	All	SecA DEAD-like domain
PF07707	0.783508	0.0419976	0.174494	2.42806e-12	2.91411e-09	7.35331e-18	All	BTB And C-terminal Kelch
PF13191	0.365253	0.172853	0.461894	1.51116e-05	1.95728e-06	3.23549e-25	All	AAA ATPase domain
PF12765	0.660365	0.093855	0.24578	2.52023e-10	3.85018e-09	3.73245e-15	All	HEAT repeat associated with sister chromatid cohesion
PF07717	0.321786	0.168828	0.509386	5.70256e-05	4.88251e-07	1.61071e-28	All	Oligonucleotide/oligosaccharide-binding (OB)-fold
PF11957	0.572316	0.133448	0.294232	2.05013e-06	0.000412384	1.05332e-10	All	THO complex subunit 1 transcription elongation factor
PF01411	0.220384	0.0843725	0.695243	5.34395e-05	1.27146e-13	2.61575e-35	All	tRNA synthetases class II (A)
PF11965	0.0665586	0.0304023	0.903039	0.000188046	1.82776e-14	4.3242e-34	All	Domain of unknown function (DUF3479)
PF07992	0.338376	0.212875	0.448749	0.000411582	0.000134016	1.17706e-23	All	Pyridine nucleotide-disulphide oxidoreductase
PF01394	0.244921	0.0949076	0.660171	2.33656e-06	3.62574e-13	3.17249e-35	All	Clathrin propeller repeat
PF11999	0.994847	0.00515284	0	1.83344e-14	0	0	All	Ice-binding-like
PF01380	0.200793	0.106253	0.692953	0.00030716	7.05006e-15	8.43612e-33	All	SIS domain
PF07973	0.334568	0.112421	0.553011	4.86939e-07	3.68037e-07	6.40219e-34	All	Threonyl and Alanyl tRNA synthetase second additional domain
PF01344	0.760462	0.0637105	0.175828	1.16462e-11	6.2714e-10	5.89508e-10	All	Kelch motif
PF12204	0.565193	0.423283	0.011514	0.000852365	2.48456e-19	6.87433e-30	All	Domain of unknown function (DUF3598), N-terminal
PF12248	0.0116452	0.286887	0.701468	4.40523e-05	6.55934e-17	3.93141e-20	All	Farnesoic acid 0-methyl transferase
PF01274	0.219747	0.0485776	0.731675	0.00031295	1.22391e-10	1.05503e-34	All	Malate synthase, TIM barrel domain
PF12340	0.00489119	0.0849256	0.910183	6.79159e-11	2.794e-17	4.54927e-34	All	Protein of unknown function (DUF3638)
PF01261	0.0181612	0.105496	0.876342	0.000456616	2.0306e-17	7.19835e-30	All	Xylose isomerase-like TIM barrel
PF12359	0.00489119	0.0849256	0.910183	6.79159e-11	2.794e-17	4.54927e-34	All	Protein of unknown function (DUF3645)
PF01232	0.305915	0.0735132	0.620571	4.33219e-06	4.87174e-05	1.75465e-27	All	Mannitol dehydrogenase Rossmann domain
PF07774	0.323424	0.0796184	0.596956	3.05803e-07	0.000167908	1.84047e-29	All	ER membrane protein complex subunit 1, C-terminal
PF01209	0.0683231	0.10748	0.824195	0.000784896	3.52745e-16	7.51768e-33	All	ubiE/COQ5 methyltransferase family
PF07766	0.564544	0.142343	0.293114	3.11082e-08	2.89544e-05	2.72427e-14	All	LETM1-like, RBD
PF03635	0.366553	0.0869136	0.546532	3.54863e-06	0.000203543	9.61707e-31	All	Vacuolar protein sorting-associated protein 35
PF03637	0.0728818	0.267739	0.659374	0.00090769	5.7429e-16	2.17836e-18	All	Mob1/phocein family
PF12580	0.595511	0.106127	0.298361	4.61587e-09	6.49977e-05	2.0256e-11	All	Tripeptidyl peptidase II
PF07728	0.181095	0.105967	0.712938	0.000414661	9.36441e-15	1.27064e-32	All	AAA domain (dynein-related subfamily)
PF12698	0.64889	0.0759022	0.275208	3.91095e-10	2.47565e-05	1.41624e-23	All	ABC-2 family transporter protein
PF01169	0.0173407	0.904747	0.077912	4.42847e-09	3.6139e-11	1.16276e-08	All	Uncharacterized protein family UPF0016
PF07724	0.349447	0.134615	0.515938	8.05559e-10	1.07876e-08	3.14732e-32	All	AAA domain (Cdc48 subfamily)
PF07719	0.283502	0.176013	0.540486	0.000367788	2.14357e-12	5.17672e-32	All	Tetratricopeptide repeat
PF01150	0.647707	0.136404	0.215889	6.73574e-07	1.61249e-06	1.83924e-06	All	GDA1/CD39 (nucleoside phosphatase) family
PF12739	0.317231	0.06357	0.619189	0.000251508	0.000271309	3.9074e-24	All	ER-Golgi trafficking TRAPP I complex 85 kDa subunit
PF07714	0.409149	0.15073	0.440121	2.22033e-05	4.88191e-05	1.40131e-25	All	Protein tyrosine and serine/threonine kinase
PF11940	0.203193	0.0820713	0.714736	2.07197e-05	2.32061e-15	5.72127e-36	All	Domain of unknown function (DUF3458) Ig-like fold
PF00916	0.681596	0.122507	0.195897	5.8049e-10	1.58217e-10	3.69374e-09	All	Sulfate permease family
PF07466	0.548406	0.201954	0.24964	5.04385e-07	2.03834e-08	3.38645e-05	All	Protein of unknown function (DUF1517)
PF00654	0.0367229	0.301128	0.662149	4.08049e-07	1.59932e-16	1.10815e-14	All	Voltage gated chloride channel
PF00651	0.779612	0.0378359	0.182552	7.48306e-13	7.15236e-09	3.35327e-21	All	BTB/POZ domain
PF13513	0.301407	0.1482	0.550393	1.08839e-05	3.59003e-08	7.0779e-31	All	HEAT-like repeat
PF13517	0.296502	0.115636	0.587862	3.02233e-06	1.11455e-06	1.06069e-29	All	FG-GAP-like repeat
PF13519	0.214378	0.109369	0.676252	0.000730443	5.41287e-12	2.27548e-32	All	von Willebrand factor type A domain
PF00642	0.628043	0.241229	0.130728	0.000450245	1.19661e-11	3.85431e-07	All	Zinc finger C-x8-C-x5-C-x3-H type (and similar)
PF00637	0.235642	0.0900697	0.674288	4.5183e-07	3.86301e-14	2.01151e-35	All	Region in Clathrin and VPS
PF13522	0.263529	0.130839	0.605632	0.000203569	1.88652e-09	3.41623e-29	All	Glutamine amidotransferase domain
PF00632	0.199369	0.0746859	0.725945	9.73093e-08	2.09661e-14	1.41662e-35	All	HECT-domain (ubiquitin-transferase)
PF06814	0.148963	0.0770553	0.77398	0.000245612	5.04159e-15	6.93229e-34	All	Lung seven transmembrane receptor
PF00623	0.366335	0.178681	0.454984	0.000314882	1.20408e-06	5.07018e-22	All	RNA polymerase Rpb1, domain 2
PF00615	0.29082	0.135019	0.574161	7.03018e-07	1.14575e-08	1.91876e-27	All	Regulator of G protein signaling domain
PF06799	0.624894	0.318778	0.0563282	4.31165e-07	1.2339e-15	9.15655e-07	All	Conserved in the green lineage and diatoms 27
PF13540	0.297387	0.183891	0.518722	0.000243218	7.72103e-08	2.65189e-25	All	Regulator of chromosome condensation (RCC1) repeat
PF06747	0.811098	0.188901	0	4.81599e-05	0	0	All	CHCH domain
PF00589	0.798316	0.0316165	0.170067	3.72964e-10	1.40677e-07	4.73139e-07	All	Phage integrase family
PF13587	0.593484	0.32324	0.0832761	9.93091e-05	6.0571e-11	3.84902e-05	All	DJ-1_PfpI_N
PF00578	0.726892	0.059262	0.213846	3.91095e-10	1.37622e-06	1.45066e-26	All	AhpC/TSA family
PF00571	0.309263	0.224871	0.465866	0.000371856	1.33448e-06	1.30494e-25	All	CBS domain
PF04209	0.340019	0.0392499	0.620727	5.45453e-05	0.000512699	8.1071e-34	All	Homogentisate 1,2-dioxygenase C-terminal
PF00553	0.111214	0.330972	0.557813	0.000550696	9.56761e-11	5.9758e-13	All	Cellulose binding domain
PF04232	0.247464	0.0889012	0.663635	7.56902e-05	2.14731e-10	2.95069e-33	All	Stage V sporulation protein S (SpoVS)
PF06479	0.293373	0.0323896	0.674235	0.000328487	1.71149e-05	5.72658e-34	All	Ribonuclease 2-5A
PF00534	0.354077	0.142927	0.502995	9.03856e-07	0.000522285	5.07984e-31	All	Glycosyl transferases group 1
PF00530	0.0479633	0.0321992	0.919837	0.00032558	1.49076e-16	2.5135e-35	All	Scavenger receptor cysteine-rich domain
PF04387	0.523998	0.232914	0.243087	0.000170644	4.22817e-06	7.65027e-05	All	Protein tyrosine phosphatase-like protein, PTPLA
PF06424	0.31283	0.120572	0.566598	9.79864e-06	4.01554e-07	7.17578e-31	All	PRP1 splicing factor, N-terminal
PF04408	0.321786	0.168828	0.509386	5.70256e-05	4.88251e-07	1.61071e-28	All	Helicase associated domain (HA2), winged-helix
PF00494	0.645747	0.14428	0.209973	1.38001e-08	1.87684e-08	0.000316696	All	Squalene/phytoene synthase
PF00664	0.307625	0.133517	0.558858	7.90649e-06	2.85141e-08	2.48088e-32	All	ABC transporter transmembrane region
PF07478	0.470592	0.488544	0.0408635	4.58194e-08	1.68171e-12	4.71254e-07	All	D-ala D-ala ligase C-terminus
PF00668	0.246361	0.0757471	0.677892	4.40523e-05	5.51154e-11	6.68484e-34	All	Condensation domain
PF06868	0.250984	0.373048	0.375967	0.000663932	3.4673e-05	1.31359e-15	All	Protein of unknown function (DUF1257)
PF00899	0.292827	0.116661	0.590512	4.37432e-07	8.1196e-10	8.4762e-34	All	ThiF family
PF07394	0.0320865	0.15922	0.808694	4.28337e-07	9.76222e-17	6.43811e-29	All	Protein of unknown function (DUF1501)
PF03950	0.322345	0.166261	0.511393	7.50935e-05	0.000407421	8.9615e-23	All	tRNA synthetases class I (E and Q), anti-codon binding domain
PF07304	0.267857	0.0436202	0.688522	3.36272e-09	4.88226e-10	7.86521e-35	All	Steroid receptor RNA activator (SRA1)
PF00885	0.895196	0.0996472	0.00515644	1.00882e-09	1.64599e-36	2.20661e-36	All	6,7-dimethyl-8-ribityllumazine synthase
PF07228	0.562503	0.32715	0.110345	0.000808418	2.7935e-14	7.71381e-06	All	Stage II sporulation protein E (SpoIIE)
PF13242	0.507492	0.207238	0.28527	1.06909e-05	0.000153312	5.1788e-07	All	HAD-hyrolase-like
PF13245	0.174925	0.0630646	0.76201	1.30642e-06	4.21961e-15	2.80689e-35	All	AAA domain
PF07047	0.692868	0.276691	0.0304315	0.000538595	1.74225e-16	2.97751e-20	All	Optic atrophy 3 protein (OPA3)
PF13292	0.337081	0.0955844	0.567334	2.26904e-05	0.000331208	6.19657e-29	All	1-deoxy-D-xylulose-5-phosphate synthase
PF13344	0.545777	0.20417	0.250052	1.09893e-05	0.000156525	6.99969e-06	All	Haloacid dehalogenase-like hydrolase
PF13386	0.670308	0.143207	0.186484	2.82867e-08	7.71961e-10	1.46064e-05	All	Cytochrome C biogenesis protein transmembrane region
PF04053	0.292169	0.137901	0.56993	9.411e-05	1.92425e-09	6.74908e-32	All	Coatomer WD associated region
PF00749	0.315775	0.142736	0.541489	1.84795e-05	9.43455e-05	2.64781e-25	All	tRNA synthetases class I (E and Q), catalytic domain
PF00743	0.527813	0.318986	0.153201	2.32158e-07	9.53996e-09	1.00119e-06	All	Flavin-binding monooxygenase-like
PF13409	0.835243	0.0748434	0.089913	5.92197e-09	2.11317e-11	0.000857614	All	Glutathione S-transferase, N-terminal domain
PF13415	0.678034	0.0605883	0.261377	1.16462e-11	2.83499e-05	4.67134e-29	All	Galactose oxidase, central domain
PF04059	0.29792	0.148191	0.553887	0.000521675	1.35116e-06	6.1574e-28	All	RNA recognition motif 2
PF13426	0.511866	0.20085	0.287284	1.01622e-06	5.51982e-05	9.48089e-08	All	PAS domain
PF13428	0.290517	0.114314	0.595168	3.80089e-05	2.59824e-09	2.82692e-32	All	Tetratricopeptide repeat
PF00702	0.275693	0.157717	0.56659	0.000414661	5.41287e-12	7.53854e-32	All	haloacid dehalogenase-like hydrolase
PF04072	0.367585	0.0964086	0.536006	3.69725e-10	0.000310523	2.04901e-33	All	Leucine carboxyl methyltransferase
PF13451	0.302634	0.118167	0.5792	3.17154e-06	1.5126e-07	1.90784e-32	All	Probable zinc-ribbon domain
PF04073	0.110217	0.635325	0.254458	1.24896e-05	9.54615e-11	7.07719e-05	All	Aminoacyl-tRNA editing domain
PF06943	0.0466524	0.019744	0.933604	3.72373e-06	1.05729e-16	5.11799e-36	All	LSD1 zinc finger
PF13460	0.48716	0.361148	0.151692	9.94024e-09	6.68505e-13	0.000204791	All	NAD(P)H-binding
PF00684	0.581034	0.0886221	0.330344	2.28311e-11	9.40424e-08	1.33935e-28	All	DnaJ central domain
PF13469	0.308746	0.168197	0.523056	0.000358773	2.31207e-07	4.949e-25	All	Sulfotransferase family
PF04100	0.254146	0.134598	0.611252	0.000543006	1.69966e-09	9.50771e-27	All	Vps53, N-terminal
PF00670	0.689151	0.250192	0.060657	1.96321e-05	8.71409e-16	5.49149e-09	All	S-adenosyl-L-homocysteine hydrolase, NAD binding domain
PF13692	0.295414	0.144738	0.559846	0.000884178	1.18065e-07	1.13211e-30	All	Glycosyl transferases group 1
PF07993	0.436041	0.491571	0.0723881	8.24038e-06	1.43998e-07	3.56956e-06	All	Male sterility protein
PF01432	0.251242	0.104955	0.643803	1.03982e-05	3.48909e-11	2.20456e-33	All	Peptidase family M3
PF09317	0.208547	0.0368209	0.754632	4.45907e-08	5.43019e-11	2.76972e-34	All	Acyl-CoA dehydrogenase, C-terminal, bacterial type
PF09324	0.0448288	0.0127261	0.942445	3.97733e-08	7.54996e-17	1.42462e-36	All	Mon2/Sec7/BIG1-like, HDS
PF02272	0.220384	0.0843725	0.695243	5.34395e-05	1.27146e-13	2.61575e-35	All	DHHA1 domain
PF09358	0.286014	0.0655346	0.648451	3.41605e-07	2.19049e-08	4.3709e-35	All	Ubiquitin fold domain
PF08498	0.727852	0.194312	0.0778346	2.60924e-07	8.33606e-13	7.30526e-05	All	Sterol methyltransferase C-terminal
PF02878	0.270379	0.158089	0.571532	4.16375e-06	2.61404e-10	5.82476e-29	All	Phosphoglucomutase/phosphomannomutase, alpha/beta/alpha domain I
PF02181	0.360846	0.127239	0.511915	2.75853e-05	0.000358265	1.57858e-26	All	Formin Homology 2 Domain
PF02879	0.270379	0.158089	0.571532	4.16375e-06	2.61404e-10	5.82476e-29	All	Phosphoglucomutase/phosphomannomutase, alpha/beta/alpha domain II
PF02880	0.270379	0.158089	0.571532	4.16375e-06	2.61404e-10	5.82476e-29	All	Phosphoglucomutase/phosphomannomutase, alpha/beta/alpha domain III
PF02881	0.029898	0.358512	0.61159	1.07138e-09	9.81576e-17	2.48897e-10	All	SRP54-type protein, helical bundle domain
PF08487	0.0466524	0.019744	0.933604	3.72373e-06	1.05729e-16	5.11799e-36	All	Vault protein inter-alpha-trypsin domain
PF08454	0.21007	0.0786227	0.711307	0.000115069	1.89553e-09	6.93455e-31	All	RyR and IP3R Homology associated
PF02148	0.282767	0.087871	0.629362	9.36739e-06	3.84051e-08	9.18013e-34	All	Zn-finger in ubiquitin-hydrolases and other protein
PF02142	0.266093	0.0788201	0.655086	5.78963e-09	1.09813e-07	2.75201e-34	All	MGS-like domain
PF02893	0.320074	0.119374	0.560552	7.91358e-08	1.07705e-06	7.35357e-28	All	GRAM domain
PF02135	0.350282	0.0746635	0.575054	2.22478e-09	3.94497e-06	3.31039e-34	All	TAZ zinc finger
PF02134	0.257843	0.0640231	0.678134	6.25162e-08	6.77558e-11	1.51175e-35	All	UBACT
PF08448	0.294284	0.088603	0.617113	1.84795e-05	2.46769e-06	1.29792e-30	All	PAS fold
PF02897	0.323166	0.153552	0.523282	6.84131e-06	7.92495e-07	2.19102e-31	All	Prolyl oligopeptidase, N-terminal beta-propeller domain
PF02921	0.57196	0.17229	0.255749	4.7572e-05	0.000209183	4.73858e-05	All	Ubiquinol cytochrome reductase transmembrane region
PF02045	0.886945	0.113055	0	1.49039e-05	0	0	All	CCAAT-binding transcription factor (CBF-B/NF-YA) subunit B
PF02028	0.184269	0.0794815	0.736249	0.000363482	1.24094e-13	6.32163e-33	All	BCCT, betaine/carnitine/choline family transporter
PF08393	0.204472	0.0945407	0.700987	1.96321e-05	3.11315e-14	8.48241e-34	All	Dynein heavy chain, N-terminal region 2
PF02008	0.666348	0.155989	0.177663	1.50381e-07	1.53225e-07	4.52949e-06	All	CXXC zinc finger domain
PF08385	0.210613	0.0999242	0.689463	3.2336e-05	5.35038e-14	1.14423e-32	All	Dynein heavy chain, N-terminal region 1
PF08375	0.284186	0.10155	0.614264	1.76579e-06	1.71225e-05	1.5387e-26	All	Proteasome regulatory subunit C-terminal
PF09906	0.0466524	0.019744	0.933604	3.72373e-06	1.05729e-16	5.11799e-36	All	Uncharacterized protein conserved in bacteria (DUF2135)
PF08367	0.298516	0.0958958	0.605588	8.94528e-08	4.35904e-09	7.7352e-33	All	Peptidase M16C associated
PF08333	0.308395	0	0.691605	0	6.73279e-06	0	All	Protein of unknown function (DUF1725)
PF02822	0.965432	0.0325648	0.00200315	3.36095e-12	5.71934e-18	8.16652e-15	All	Antistasin family protease inhibitor
PF02991	0.530213	0.230128	0.239659	1.65955e-05	4.44379e-05	4.66152e-06	All	Autophagy protein Atg8 ubiquitin like
PF02320	0.163223	0.826133	0.0106434	0.00019425	4.52946e-11	2.84412e-29	All	Ubiquinol-cytochrome C reductase hinge protein
PF02342	0.0347751	0.249748	0.715477	2.60461e-06	2.23561e-14	3.25059e-12	All	TerD domain
PF08659	0.342217	0.102865	0.554918	4.13273e-06	2.55131e-07	1.77655e-30	All	KR domain
PF02678	0.738224	0.125587	0.13619	5.92753e-08	5.20073e-08	6.87102e-08	All	Pirin
PF02622	0.646103	0.13189	0.222007	6.84681e-08	1.14391e-06	6.85797e-05	All	Uncharacterized ACR, COG1678
PF08726	0.347923	0.0721317	0.579945	1.11802e-06	0.000100448	1.50485e-31	All	Ca2+ insensitive EF hand
PF08740	0.21007	0.0786227	0.711307	0.000115069	1.89553e-09	6.93455e-31	All	BCS1 N terminal
PF08623	0.157303	0.0720077	0.770686	0.000921879	4.79756e-15	3.85494e-35	All	TATA-binding protein interacting (TIP20)
PF02576	0.706979	0.257507	0.0355075	0.00037018	8.3789e-15	7.31209e-17	All	RimP N-terminal domain
PF02569	0.383729	0.0309197	0.585351	5.85751e-09	0.000449444	1.2861e-35	All	Pantoate-beta-alanine ligase
PF02759	0.183478	0.140088	0.676434	0.000703057	8.5454e-15	6.8361e-30	All	RUN domain
PF02548	0.383729	0.0309197	0.585351	5.85751e-09	0.000449444	1.2861e-35	All	Ketopantoate hydroxymethyltransferase
PF02771	0.294999	0.132296	0.572705	2.86407e-06	1.02217e-06	1.36138e-28	All	Acyl-CoA dehydrogenase, N-terminal domain
PF08777	0.15589	0.0646528	0.779457	7.96726e-05	1.75223e-14	4.26057e-35	All	RNA binding motif
PF08609	0.710555	0.0829254	0.206519	3.48837e-08	2.64061e-05	2.26549e-12	All	Nucleotide exchange factor Fes1
PF02514	0.0665586	0.0304023	0.903039	0.000188046	1.82776e-14	4.3242e-34	All	CobN/Magnesium Chelatase
PF08825	0.176095	0.058914	0.764991	1.02062e-07	1.00585e-14	1.20112e-35	All	E2 binding domain
PF02785	0.238366	0.132137	0.629497	0.000818357	2.78538e-12	1.39841e-32	All	Biotin carboxylase C-terminal domain
PF02786	0.264328	0.11472	0.620952	6.20965e-06	1.45448e-11	1.90904e-34	All	Carbamoyl-phosphate synthase L chain, ATP binding domain
PF02787	0.319234	0.077839	0.602927	7.71658e-10	0.000209183	3.53925e-33	All	Carbamoyl-phosphate synthetase large chain, oligomerisation domain
PF09011	0.707699	0.209968	0.0823326	1.05866e-06	6.13056e-14	1.07771e-05	All	HMG-box domain
PF02788	0.10138	0.123472	0.775147	7.56902e-05	1.1139e-13	5.26214e-26	All	Ribulose bisphosphate carboxylase large chain, N-terminal domain
PF08572	0.274617	0.0348403	0.690542	2.3866e-09	1.22939e-08	4.37491e-36	All	pre-mRNA processing factor 3 domain
PF09070	0.217915	0.0469242	0.735161	6.44991e-06	1.74812e-10	7.54065e-33	All	PFU (PLAA family ubiquitin binding)
PF09111	0.350224	0.160473	0.489303	1.65955e-05	0.000194298	3.0055e-29	All	SLIDE
PF02801	0.307396	0.14241	0.550194	0.000434639	5.2611e-07	1.91535e-28	All	Beta-ketoacyl synthase, C-terminal domain
PF09180	0.110217	0.635325	0.254458	1.24896e-05	9.54615e-11	7.07719e-05	All	Prolyl-tRNA synthetase, C-terminal
PF09268	0.244921	0.0949076	0.660171	2.33656e-06	3.62574e-13	3.17249e-35	All	Clathrin, heavy-chain linker
PF09269	0.643059	0.270769	0.0861673	0.000353098	2.55396e-11	6.90859e-07	All	Domain of unknown function (DUF1967)
PF09280	0.538329	0.214763	0.246907	4.53925e-06	2.68986e-06	0.000217522	All	XPC-binding domain
PF02812	0.593455	0.12785	0.278695	8.94528e-08	2.94479e-05	7.55878e-10	All	Glu/Leu/Phe/Val dehydrogenase, dimerisation domain
PF02338	0.309563	0.110608	0.579829	3.19247e-07	1.09813e-07	2.17804e-30	All	OTU-like cysteine protease
PF03398	0.157775	0.0572056	0.785019	0.000137851	2.26396e-11	4.47126e-32	All	Regulator of Vps4 activity in the MVB pathway
PF03009	0.56945	0.13129	0.299258	3.56604e-07	0.000167045	9.35927e-09	All	Glycerophosphoryl diester phosphodiesterase family
PF08326	0.280977	0.0945889	0.624434	1.23653e-06	1.51236e-05	7.82922e-30	All	Acetyl-CoA carboxylase, central region
PF03199	0.225538	0.121711	0.65275	4.33754e-05	1.17406e-11	1.05057e-28	All	Eukaryotic glutathione synthase
PF10585	0.257843	0.0640231	0.678134	6.25162e-08	6.77558e-11	1.51175e-35	All	Ubiquitin-activating enzyme, SCCH domain
PF01627	0.34837	0.102074	0.549556	5.06668e-07	2.00328e-05	2.37054e-31	All	Hpt domain
PF10589	0.288503	0.128151	0.583345	9.411e-05	5.89224e-05	3.89702e-29	All	NADH-ubiquinone oxidoreductase-F iron-sulfur binding region
PF01607	0.111214	0.330972	0.557813	0.000550696	9.56761e-11	5.9758e-13	All	Chitin binding Peritrophin-A domain
PF03219	0.504497	0.225276	0.270225	0.000157518	0.00021438	0.000144619	All	TLC ATP/ADP transporter
PF01596	0.558512	0.183899	0.257589	5.68985e-06	0.000110407	6.27785e-05	All	O-methyltransferase
PF10647	0.313236	0.0292934	0.657452	3.45201e-07	0.000853625	1.47677e-25	All	Lipoprotein LpqB beta-propeller domain
PF08033	0.207373	0.11712	0.675505	0.000789773	3.98045e-13	1.01502e-32	All	Sec23/Sec24 beta-sandwich domain
PF01578	0.356414	0.197209	0.446376	0.000604685	1.61415e-05	3.60332e-18	All	Cytochrome C assembly protein
PF10927	0.000787005	0.648222	0.350991	2.26893e-08	3.51908e-17	8.35878e-12	All	Protein of unknown function (DUF2738)
PF11069	0.599096	0.136508	0.264396	1.24644e-06	3.23716e-05	3.77677e-12	All	Cilia- and flagella-associated protein 298
PF01545	0.643097	0.161444	0.195458	5.288e-08	1.03199e-09	0.000203516	All	Cation efflux family
PF03348	0.260182	0.148983	0.590835	0.000143317	5.95199e-13	1.32096e-30	All	Serine incorporator (Serinc)
PF11211	0.70957	0.29043	0	9.68776e-05	0	0	All	Protein of unknown function (DUF2997)
PF01521	0.653874	0.249826	0.0962993	2.24437e-06	4.06126e-14	0.000113886	All	Iron-sulphur cluster biosynthesis
PF01512	0.288503	0.128151	0.583345	9.411e-05	5.89224e-05	3.89702e-29	All	Respiratory-chain NADH dehydrogenase 51 Kd subunit
PF03358	0.488168	0.468919	0.0429135	4.49204e-06	4.54669e-15	4.53774e-05	All	NADPH-dependent FMN reductase
PF01503	0.59369	0.122492	0.283815	7.11089e-08	0.000433255	5.85774e-09	All	Phosphoribosyl-ATP pyrophosphohydrolase
PF01502	0.70501	0.0680537	0.226936	8.26712e-09	9.24472e-06	3.05725e-09	All	Phosphoribosyl-AMP cyclohydrolase
PF01501	0.322596	0.156453	0.52095	0.000219597	9.46531e-07	1.00811e-28	All	Glycosyl transferase family 8
PF11496	0.35405	0.156644	0.489306	7.80319e-06	0.000208677	8.56879e-30	All	Class II histone deacetylase complex subunits 2 and 3
PF11699	0.652402	0	0.347598	0	4.74807e-08	0	All	Mif2/CENP-C like
PF07998	0.141623	0.0422077	0.816169	1.12829e-06	3.83524e-12	4.93638e-33	All	Peptidase family M54
PF01467	0.560022	0.125321	0.314656	2.28701e-09	1.91186e-05	6.16447e-17	All	Cytidylyltransferase-like
PF07994	0.106704	0.399771	0.493524	0.000229958	1.00585e-14	1.1136e-05	All	Myo-inositol-1-phosphate synthase
PF01457	0.758579	0.0250607	0.21636	7.33741e-10	2.03511e-05	6.35977e-31	All	Leishmanolysin
PF01435	0.139584	0.0376442	0.822772	3.35334e-06	1.42107e-14	3.89875e-35	All	Peptidase family M48
PF01433	0.209827	0.112458	0.677715	0.000235781	9.35417e-15	2.23073e-34	All	Peptidase family M1 domain
PF01656	0.546466	0.185811	0.267722	4.63882e-08	3.0422e-06	3.96431e-12	All	CobQ/CobB/MinD/ParA nucleotide binding domain
PF10184	0.545828	0.146588	0.307585	5.8566e-08	1.26762e-06	1.88945e-15	All	Uncharacterized conserved protein (DUF2358)
PF01658	0.106704	0.399771	0.493524	0.000229958	1.00585e-14	1.1136e-05	All	Myo-inositol-1-phosphate synthase
PF03193	0.148126	0.0578993	0.793973	0.000283881	1.00316e-12	1.36493e-32	All	RsgA GTPase
PF08324	0.232712	0.0493393	0.717949	1.5324e-06	4.91906e-10	8.43612e-33	All	PUL domain
PF03028	0.207289	0.120028	0.672683	0.000380429	1.43086e-14	8.51584e-34	All	Dynein heavy chain region D6 P-loop domain
PF01909	0.277653	0.0802443	0.642103	3.23802e-05	2.34216e-06	8.63997e-30	All	Nucleotidyltransferase domain
PF01906	0.812614	0.187385	0	6.03023e-05	0	0	All	Putative heavy-metal-binding
PF08309	0.0165643	0.136073	0.847363	1.33342e-05	3.76063e-16	8.16935e-17	All	LVIVD repeat
PF08298	0.378768	0.0861191	0.535113	6.39409e-07	0.000282802	3.67598e-32	All	PrkA AAA domain
PF03083	0.0591689	0.723231	0.2176	1.57309e-07	1.93293e-05	1.62615e-08	All	Sugar efflux transporter for intercellular exchange
PF08264	0.32799	0.156059	0.51595	0.000346683	4.93172e-05	5.8525e-28	All	Anticodon-binding domain of tRNA ligase
PF10255	0.0943726	0.312763	0.592863	0.000392155	8.51446e-14	6.12381e-11	All	RNA polymerase I-associated factor PAF67
PF01842	0.317208	0.183006	0.499786	0.00073774	1.67136e-06	1.37488e-23	All	ACT domain
PF01839	0.238748	0.118652	0.6426	0.000918577	3.16686e-10	3.19032e-29	All	FG-GAP repeat
PF01833	0.152495	0.0702058	0.777299	4.98318e-07	6.93093e-15	3.32126e-34	All	IPT/TIG domain
PF01825	0.251946	0.0637754	0.684279	4.00735e-09	7.23887e-12	6.66055e-35	All	GPCR proteolysis site, GPS, motif
PF10269	0.695439	0.117061	0.1875	1.02048e-11	3.83163e-14	2.27681e-08	All	Transmembrane Fragile-X-F protein
PF01789	0.608898	0.294974	0.0961275	0.000200085	2.43002e-12	4.71355e-05	All	PsbP
PF01786	0.287451	0.120895	0.591653	6.80745e-06	1.63436e-07	1.47847e-28	All	Alternative oxidase
PF10431	0.392002	0.141874	0.466124	2.83532e-08	8.89023e-05	7.35212e-29	All	C-terminal, D2-small domain, of ClpB protein
PF10433	0.232939	0.113814	0.653247	7.94762e-05	4.01164e-11	9.22275e-31	All	Mono-functional DNA-alkylating methyl methanesulfonate N-term
PF08214	0.321394	0.0816615	0.596944	1.40504e-09	1.65178e-08	6.41054e-34	All	Histone acetylation protein
PF01769	0.634058	0.294262	0.07168	5.67273e-05	2.92705e-12	1.47183e-09	All	Divalent cation transporter
PF01764	0.495103	0.179272	0.325625	1.94798e-06	0.000378526	3.58178e-06	All	Lipase (class 3)
PF01761	0.896114	0.0445709	0.0593154	6.44937e-12	1.6664e-15	8.1339e-09	All	3-dehydroquinate synthase
PF01757	0.0740352	0.156411	0.769554	3.07263e-05	1.81398e-14	9.38466e-23	All	Acyltransferase family
PF08212	0.749036	0.0841536	0.166811	2.56934e-08	8.98933e-08	6.19505e-08	All	Lipocalin-like domain
PF08190	0.551383	0.174233	0.274384	2.32158e-07	2.83564e-06	2.37032e-06	All	PIH1 N-terminal domain
PF01749	0.274127	0.137892	0.587981	0.000235781	3.25603e-11	1.33164e-31	All	Importin beta binding domain
PF05486	0.123645	0.856272	0.0200806	0.000564297	2.32061e-15	1.20691e-33	All	Signal recognition particle 9 kDa protein (SRP9)
PF03178	0.232939	0.113814	0.653247	7.94762e-05	4.01164e-11	9.22275e-31	All	CPSF A subunit region
PF10531	0.288503	0.128151	0.583345	9.411e-05	5.89224e-05	3.89702e-29	All	SLBB domain
PF10559	0.0360154	0.365315	0.59867	9.21023e-06	2.6173e-17	9.37251e-10	All	Plug domain of Sec61p
PF13719	0.812011	0.161908	0.0260814	6.20546e-06	3.71156e-14	2.25038e-11	All	zinc-ribbon domain
PF13086	0.231561	0.11787	0.650569	2.49186e-05	8.2135e-13	1.61346e-33	All	AAA domain
PF04930	0.774664	0.212998	0.0123388	3.30414e-07	4.67345e-18	2.62808e-25	All	FUN14 family
PF00328	0.0509339	0.00739473	0.941671	1.40504e-09	2.93379e-16	1.16491e-36	All	Histidine phosphatase superfamily (branch 2)
PF00225	0.324711	0.137386	0.537903	1.52622e-06	1.03403e-07	1.50456e-30	All	Kinesin motor domain
PF00326	0.2719	0.157119	0.570981	0.000439706	1.1385e-08	1.4872e-27	All	Prolyl oligopeptidase family
PF00441	0.294207	0.147124	0.558669	6.93878e-06	7.6226e-07	2.01169e-27	All	Acyl-CoA dehydrogenase, C-terminal domain
PF04997	0.351651	0.175534	0.472815	0.000134048	5.79303e-08	1.28907e-20	All	RNA polymerase Rpb1, domain 1
PF00443	0.222449	0.119198	0.658353	1.39895e-05	5.3072e-15	2.67028e-34	All	Ubiquitin carboxyl-terminal hydrolase
PF13792	0.766158	0.0791013	0.15474	2.67988e-11	1.28109e-11	1.30789e-12	All	Sulfate_tra_GLY
PF00171	0.239954	0.110307	0.649739	1.70025e-06	9.77464e-14	3.11563e-35	All	Aldehyde dehydrogenase family
PF00122	0.277881	0.160391	0.561728	0.000400924	2.76366e-11	1.21345e-30	All	E1-E2 ATPase
PF13920	0.609851	0.153137	0.237012	6.83441e-09	8.21903e-09	3.09885e-07	All	Zinc finger, C3HC4 type (RING finger)
PF00448	0.0690338	0.333934	0.597032	5.0299e-06	1.60105e-16	2.32138e-12	All	SRP54-type protein, GTPase domain
PF00226	0.480451	0.168404	0.351145	3.45554e-10	3.02833e-05	2.79795e-20	All	DnaJ domain
PF00223	0.238451	0.20005	0.561499	0.00031295	1.53225e-07	9.26075e-22	All	Photosystem I psaA/psaB protein
PF04545	0.552754	0.199313	0.247933	2.76358e-07	1.19732e-07	1.4336e-05	All	Sigma-70, region 4
PF05328	0.877065	0.112871	0.0100637	5.23237e-08	9.34615e-17	1.16691e-14	All	CybS, succinate dehydrogenase cytochrome B small subunit
PF13877	0.351654	0.0840109	0.564334	8.9779e-08	0.000163954	1.65772e-29	All	Potential Monad-binding region of RPAP3
PF05542	0.702628	0.124094	0.173278	7.54349e-09	2.55214e-10	2.44631e-06	All	Protein of unknown function (DUF760)
PF05383	0.317616	0.161754	0.52063	0.000120976	1.36621e-05	7.67325e-28	All	La domain
PF00053	0.503536	0	0.496458	0	0.000156578	0	All	Laminin EGF domain
PF00117	0.302344	0.104129	0.593527	5.19695e-08	1.63295e-05	4.08133e-32	All	Glutamine amidotransferase class-I
PF00116	0.328659	0.101518	0.569821	3.36459e-05	0.000260027	1.45972e-24	All	Cytochrome C oxidase subunit II, periplasmic domain
PF00022	0.69508	0.141435	0.163485	7.45267e-08	1.97964e-08	1.49844e-11	All	Actin
PF00397	0.348044	0.203332	0.448624	7.0508e-05	0.000189039	3.21727e-25	All	WW domain
PF05724	0.83131	0.122818	0.0458718	3.21048e-07	6.84696e-14	1.33214e-11	All	Thiopurine S-methyltransferase (TPMT)
PF00249	0.587599	0.177348	0.235053	4.33715e-10	2.74588e-10	3.30114e-09	All	Myb-like DNA-binding domain
PF14874	0.139855	0.0527537	0.80739	0.000241502	2.14052e-14	3.75007e-34	All	Flagellar-associated PapD-like
PF00169	0.21465	0.145183	0.640167	0.000265912	2.5805e-14	6.49733e-30	All	PH domain
PF00435	0.286399	0.0561968	0.657404	3.91138e-08	7.26102e-09	7.76173e-34	All	Spectrin repeat
PF14622	0	0.443814	0.556186	0	0	1.0136e-16	All	Ribonuclease-III-like
PF13881	0.0959449	0.0255188	0.878536	1.27973e-06	5.3552e-16	6.86122e-36	All	Ubiquitin-2 like Rad60 SUMO-like
PF04607	0.574398	0.1475	0.278102	2.32016e-08	1.32768e-05	1.2773e-15	All	Region found in RelA / SpoT proteins
PF05523	0.657457	0.285562	0.0569546	0.000706411	5.15984e-10	0.000351918	All	WxcM-like, C-terminal
PF13838	0.244921	0.0949076	0.660171	2.33656e-06	3.62574e-13	3.17249e-35	All	Clathrin-H-link
PF14623	0.177975	0.0513811	0.770644	2.61061e-07	7.12263e-12	5.72658e-34	All	Hint-domain
PF04983	0.52863	0.130462	0.340908	2.05947e-05	0.000391769	1.73368e-19	All	RNA polymerase Rpb1, domain 3
PF00335	0.758579	0.0250607	0.21636	7.33741e-10	2.03511e-05	6.35977e-31	All	Tetraspanin family
PF14803	0.662613	0.337382	0	0.000266852	0	0	All	Nudix N-terminal
PF00166	0.701936	0.253616	0.0444474	0.000125843	2.9257e-13	1.01639e-07	All	Chaperonin 10 Kd subunit
PF14624	0.229231	0.0613536	0.709415	3.22109e-09	6.33923e-11	3.19713e-34	All	VWA / Hh protein intein-like
PF04588	0.701356	0.260772	0.0378711	0.000108757	1.2464e-15	7.24246e-16	All	Hypoxia induced protein conserved region
PF00408	0.254578	0.161818	0.583603	5.29462e-05	3.78196e-11	6.35781e-29	All	Phosphoglucomutase/phosphomannomutase, C-terminal domain
PF13894	0.321594	0.170881	0.507524	0.000384375	6.30933e-05	8.94193e-23	All	C2H2-type zinc finger
PF00415	0.298282	0.183323	0.518395	0.000164464	1.247e-07	5.29415e-26	All	Regulator of chromosome condensation (RCC1) repeat
PF04615	0.0466524	0.019744	0.933604	3.72373e-06	1.05729e-16	5.11799e-36	All	Utp14 protein
PF13905	0.735114	0.046467	0.218419	4.33715e-10	4.28321e-06	7.71682e-29	All	Thioredoxin-like
PF13812	0.288196	0.247086	0.464718	1.70025e-06	2.95816e-08	4.4412e-26	All	Pentatricopeptide repeat domain
PF06101	0.00489119	0.0849256	0.910183	6.79159e-11	2.794e-17	4.54927e-34	All	Vacuolar protein sorting-associated protein 62
PF00140	0.52933	0.220677	0.249992	2.37189e-06	3.38805e-07	0.000702609	All	Sigma-70 factor, region 1.2
PF15239	0.68599	0.134541	0.179464	5.05036e-05	0.000326224	5.51386e-05	All	Domain of unknown function (DUF4586)
PF00330	0.315648	0.110689	0.573664	5.10508e-07	9.03611e-05	1.6388e-31	All	Aconitase family (aconitate hydratase)
PF05118	0.703859	0.239574	0.0565673	5.21556e-06	2.88823e-15	7.36083e-11	All	Aspartyl/Asparaginyl beta-hydroxylase
PF05362	0.343552	0.0871703	0.569277	1.47741e-07	7.46954e-07	4.54927e-34	All	Lon protease (S16) C-terminal proteolytic domain
PF00133	0.32799	0.156059	0.51595	0.000346683	4.93172e-05	5.8525e-28	All	tRNA synthetases class I (I, L, M and V)
PF13948	0.822745	0.0538064	0.123449	7.06768e-12	6.14839e-12	1.14883e-06	All	Domain of unknown function (DUF4215)
PF14377	0.57024	0.179074	0.250686	2.80814e-06	4.46007e-05	1.36514e-07	All	Ubiquitin binding region
PF04542	0.493802	0.228188	0.27801	8.55213e-06	6.3767e-05	2.40596e-05	All	Sigma-70 region 2
PF00463	0.240227	0.0320191	0.727754	1.58203e-08	5.3971e-07	4.45125e-34	All	Isocitrate lyase family
PF00476	0.333129	0.111807	0.555063	2.47028e-06	0.000347572	1.04335e-27	All	DNA polymerase family A
PF04811	0.207373	0.11712	0.675505	0.000789773	3.98045e-13	1.01502e-32	All	Sec23/Sec24 trunk domain
PF04539	0.52933	0.220677	0.249992	2.37189e-06	3.38805e-07	0.000702609	All	Sigma-70 region 3
PF05023	0.660571	0.105572	0.233844	1.48473e-06	5.58534e-05	0.000861642	All	Phytochelatin synthase
PF04815	0.207373	0.11712	0.675505	0.000789773	3.98045e-13	1.01502e-32	All	Sec23/Sec24 helical domain
PF00208	0.325186	0.0985141	0.576299	5.49041e-07	1.24457e-05	2.43748e-33	All	Glutamate/Leucine/Phenylalanine/Valine dehydrogenase
PF14765	0.303759	0.115701	0.58054	5.48787e-05	2.62163e-07	5.3892e-29	All	Polyketide synthase dehydratase N-terminal domain
PF14555	0.328862	0.117786	0.553351	4.03281e-07	2.83564e-06	5.74286e-33	All	UBA-like domain
PF13854	0.737767	0.0428108	0.219423	2.06138e-12	1.09813e-07	6.87809e-27	All	Kelch motif
PF05187	0.213112	0.0581816	0.728706	0.000229168	2.02408e-11	3.19713e-34	All	Electron transfer flavoprotein-ubiquinone oxidoreductase, 4Fe-4S
PF13745	0.246361	0.0757471	0.677892	4.40523e-05	5.51154e-11	6.68484e-34	All	HxxPF_rpt
PF14214	0.623076	0.102922	0.274002	8.4674e-11	4.65131e-05	3.43031e-11	All	Helitron helicase-like domain at N-terminus
PF05327	0.462852	0.0439987	0.493148	0.000116155	3.63047e-05	1.48648e-29	All	RNA polymerase I specific transcription initiation factor RRN3
PF00481	0.338718	0.207041	0.454241	0.000818357	5.51982e-05	3.58674e-21	All	Protein phosphatase 2C
PF05637	0.169705	0.0755037	0.754789	0.000358719	4.34961e-14	1.01502e-32	All	galactosyl transferase GMA12/MNN10 family
PF05875	0.753533	0.210324	0.0361377	0.000524295	5.33778e-12	6.69265e-10	All	Ceramidase
PF00075	0.684383	0.200228	0.115387	0.000378189	7.8546e-12	1.9311e-05	All	RNase H
PF00072	0.50971	0.19501	0.29528	2.60071e-08	1.25144e-06	1.49799e-08	All	Response regulator receiver domain
PF00289	0.262509	0.115927	0.621565	1.33372e-05	2.62218e-11	4.5842e-34	All	Biotin carboxylase, N-terminal domain
PF00069	0.313359	0.197788	0.488852	0.000164464	2.63231e-09	2.06109e-26	All	Protein kinase domain
PF04488	0.55887	0.223281	0.217848	5.06973e-07	1.7745e-07	7.01917e-05	All	Glycosyltransferase sugar-binding region containing DXD motif
PF05193	0.283018	0.150826	0.566156	6.74124e-05	4.57846e-12	3.12121e-33	All	Peptidase M16 inactive domain
PF00004	0.323945	0.178361	0.497694	7.98019e-08	4.32551e-10	3.25576e-32	All	ATPase family associated with various cellular activities (AAA)
PF00301	0.569135	0.31541	0.115455	0.0004193	2.09661e-14	1.41775e-10	All	Rubredoxin
PF00089	0.210113	0.474865	0.315022	1.90999e-07	0.000896438	6.49733e-30	All	Trypsin
PF05186	0.463937	0.218318	0.317744	5.06817e-06	0.000501223	7.14907e-06	All	Dpy-30 motif
PF00109	0.347987	0.139004	0.513009	2.49186e-05	3.26163e-05	8.76993e-28	All	Beta-ketoacyl synthase, N-terminal domain
PF00108	0.275085	0.158406	0.566508	0.000888506	8.91145e-10	2.45929e-31	All	Thiolase, N-terminal domain
PF00176	0.323137	0.177493	0.499371	0.00023418	1.06749e-05	7.72052e-27	All	SNF2-related domain
PF14299	0.84593	0.0294821	0.124588	1.41431e-13	1.49475e-11	2.46665e-07	All	Phloem protein 2
PF04998	0.46605	0.138932	0.395018	1.24896e-05	4.29555e-05	2.64166e-21	All	RNA polymerase Rpb1, domain 5
PF04712	0.583323	0.168188	0.248489	7.8378e-07	2.13033e-05	1.5509e-10	All	Radial spokehead-like protein
PF00307	0.278064	0.102944	0.618993	9.73497e-07	2.14932e-08	1.77655e-30	All	Calponin homology (CH) domain
PF00106	0.460745	0.209932	0.329323	6.27179e-08	0.000520096	1.66425e-11	All	short chain dehydrogenase
PF04810	0.215553	0.119758	0.664688	0.000338182	4.185e-13	9.48553e-33	All	Sec23/Sec24 zinc finger
PF13768	0.261321	0.0895671	0.649112	4.5716e-07	2.3365e-09	4.82059e-32	All	von Willebrand factor type A domain
PF14432	0.0102464	0.864736	0.125017	3.9496e-06	6.63152e-14	1.15661e-05	All	DYW family of nucleic acid deaminases
PF00005	0.319874	0.175641	0.504485	5.80308e-06	6.04989e-10	1.13211e-30	All	ABC transporter
PF05787	0	0.420585	0.579415	0	0	1.43738e-05	All	Alkaline phosphatase PhoX
PF00096	0.335006	0.141058	0.523936	6.04787e-06	0.000209183	2.55237e-25	All	Zinc finger, C2H2 type
PF13964	0.876632	0.0927157	0.0306519	7.1497e-08	2.64163e-13	1.59536e-05	All	Kelch motif
PF05405	0.166944	0.552134	0.280921	0.000770444	5.30609e-09	2.16071e-12	All	Mitochondrial ATP synthase B chain precursor (ATP-synt_B)
PF00266	0.284912	0.176751	0.538337	0.000528624	2.85141e-08	3.38335e-25	All	Aminotransferase class-V
PF05000	0.447323	0.136688	0.415989	4.74573e-06	2.24829e-05	2.02651e-22	All	RNA polymerase Rpb1, domain 4
PF00092	0.343799	0.189978	0.466224	0.000517957	0.000378526	1.10598e-18	All	von Willebrand factor type A domain
PF00016	0.10138	0.123472	0.775147	7.56902e-05	1.1139e-13	5.26214e-26	All	Ribulose bisphosphate carboxylase large chain, catalytic domain
PF03422	0.733242	0.134794	0.130666	2.64228e-06	0.181089	9.8485e-17	Arctic	Carbohydrate binding module (family 6)
PF11732	0.396135	0.0960062	0.507361	2.06573e-05	0.113814	2.24317e-28	Arctic	Transcription- and export-related complex subunit
PF01476	0.71365	0.0637132	0.22198	6.20546e-06	0.395823	8.49972e-26	Arctic	LysM domain
PF05346	0.423708	0.126488	0.441175	8.48324e-05	0.414717	3.58313e-14	Arctic	Eukaryotic membrane protein family
PF01391	0.463535	0.190169	0.346289	2.65741e-06	0.00629701	1.23354e-09	Arctic	Collagen triple helix repeat (20 copies)
PF11701	0.49338	0.0673785	0.429408	1.47655e-06	0.959315	6.08907e-30	Arctic	Myosin-binding striated muscle assembly central
PF11791	0.348832	0.0982779	0.552847	1.86837e-07	0.0277548	3.8288e-28	Arctic	Aconitate B N-terminal domain
PF01434	0.333832	0.124688	0.541478	5.06973e-07	0.0101836	3.36783e-25	Arctic	Peptidase family M41
PF01458	0.674615	0.0926555	0.232725	1.11641e-08	0.00273889	4.57999e-16	Arctic	SUF system FeS cluster assembly, SufBD
PF11708	0.452801	0.109606	0.435689	1.87927e-06	0.309841	1.70935e-25	Arctic	Pre-mRNA splicing Prp18-interacting factor
PF14495	0.54459	0.239194	0.216215	5.57917e-05	0.00390401	1.14248e-15	Arctic	Cytochrome c-550 domain
PF14826	0.431941	0.127271	0.440576	0.00031608	0.0673354	3.33625e-22	Arctic	FACT complex subunit SPT16 N-terminal lobe domain
PF01406	0.371832	0.164215	0.463933	0.000157589	0.00423005	2.75012e-21	Arctic	tRNA synthetases class I (C) catalytic domain
PF02359	0.310684	0.328387	0.360867	0.000635106	0.138452	2.8476e-14	Arctic	Cell division protein 48 (CDC48), N-terminal domain
PF00206	0.402273	0.18064	0.413876	7.30701e-05	0.937381	5.14847e-14	Arctic	Lyase
PF11831	0.474174	0.190656	0.334899	7.09204e-05	0.146617	2.19567e-10	Arctic	pre-mRNA splicing factor component
PF01399	0.373564	0.161436	0.464991	2.30137e-07	0.0300718	7.97037e-24	Arctic	PCI domain
PF08646	0.476152	0.182127	0.341709	4.13273e-06	0.00920334	1.92084e-11	Arctic	Replication factor-A C terminal domain
PF01370	0.382397	0.328829	0.288771	0.000190876	0.0265138	9.3314e-09	Arctic	NAD dependent epimerase/dehydratase family
PF07792	0.472341	0.141702	0.376156	7.29696e-05	0.619639	3.87224e-13	Arctic	Docking domain of Afi1 for Arf3 in vesicle trafficking
PF02453	0.42665	0.140531	0.431653	3.65876e-06	0.928756	3.80201e-22	Arctic	Reticulon
PF01208	0.394857	0.128349	0.476428	6.60027e-05	0.397031	1.21965e-14	Arctic	Uroporphyrinogen decarboxylase (URO-D)
PF00258	0.391518	0.234378	0.374036	0.000137851	0.422488	1.915e-08	Arctic	Flavodoxin
PF14926	0.597994	0.108987	0.291976	0.000166381	0.0627714	1.04304e-07	Arctic	Cilia- and flagella-associated protein 300
PF03639	0.467617	0.137999	0.394239	6.63939e-05	0.121659	3.23645e-22	Arctic	Glycosyl hydrolase family 81 N-terminal domain
PF00027	0.37837	0.201733	0.419896	2.35315e-05	0.00644602	1.97779e-19	Arctic	Cyclic nucleotide-binding domain
PF07742	0.584005	0.0903361	0.32445	4.13273e-06	0.149531	6.76881e-15	Arctic	BTG family
PF12680	0.362745	0.189265	0.446326	0.000813159	0.598324	1.4434e-10	Arctic	SnoaL-like domain
PF12457	0.72318	0.0425882	0.234022	4.89156e-06	0.0255423	1.46736e-13	Arctic	Tuftelin interacting protein N terminal
PF14295	0.374516	0.179992	0.445492	0.000424657	0.00224196	7.81992e-24	Arctic	PAN domain
PF04886	0.45675	0.104434	0.4387	1.39943e-06	0.17211	3.24532e-24	Arctic	PT repeat
PF01172	0.452796	0.0544403	0.476986	1.76186e-05	0.602789	2.80732e-24	Arctic	Shwachman-Bodian-Diamond syndrome (SBDS) protein
PF14259	0.432249	0.196595	0.370667	1.58593e-05	0.522715	8.77493e-13	Arctic	RRM_6
PF02190	0.395175	0.12279	0.482005	7.72394e-08	0.0318457	1.17514e-27	Arctic	ATP-dependent protease La (LON) substrate-binding domain
PF12707	0.0312531	0.916575	0.052053	0.0003483	0.0480364	0.000961347	Arctic	Protein of unknown function (DUF3804)
PF07727	0.539646	0.135403	0.324941	4.40523e-05	0.00394888	0.000509596	Arctic	Reverse transcriptase (RNA-dependent DNA polymerase)
PF01154	0.849809	0.0436241	0.106509	6.20546e-06	0.0102986	1.14145e-10	Arctic	Hydroxymethylglutaryl-coenzyme A synthase N terminal
PF12724	0.383887	0.23711	0.378907	0.00032558	0.553748	2.88731e-08	Arctic	Flavodoxin domain
PF01144	0.557816	0.0587369	0.380472	5.30856e-08	0.644415	1.06702e-30	Arctic	Coenzyme A transferase
PF12697	0.496204	0.117281	0.38646	3.81512e-11	0.146865	1.63238e-30	Arctic	Alpha/beta hydrolase family
PF07810	0.330464	0.196019	0.45616	0.000397173	0.818969	3.54284e-09	Arctic	TMC domain
PF07819	0.467109	0.193068	0.339693	2.49186e-05	0.0345998	2.55417e-07	Arctic	PGAP1-like protein
PF14913	0.33301	0.141214	0.525703	0.000689669	0.0127482	5.50374e-20	Arctic	DPCD protein family
PF01369	0.391914	0.0761689	0.531907	7.61677e-10	0.00609989	5.71294e-33	Arctic	Sec7 domain
PF04969	0.40822	0.207372	0.383892	4.44582e-06	0.601916	1.2797e-14	Arctic	CS domain
PF02374	0.443399	0.183429	0.365309	0.00084393	0.931895	1.11306e-13	Arctic	Anion-transporting ATPase
PF01351	0.454064	0.0835	0.459294	1.95241e-07	0.876594	5.20131e-16	Arctic	Ribonuclease HII
PF00487	0.407152	0.215521	0.377264	2.24437e-06	0.253975	5.92497e-15	Arctic	Fatty acid desaturase
PF09206	0.444887	0.238224	0.316868	0.000641697	0.012284	4.25755e-05	Arctic	Alpha-L-arabinofuranosidase B, catalytic
PF12171	0.444052	0.109556	0.446257	5.34395e-05	0.0199324	7.43997e-25	Arctic	Zinc-finger double-stranded RNA-binding
PF14312	0.34279	0.200081	0.457128	8.11153e-05	0.00213369	1.48261e-19	Arctic	FG-GAP repeat
PF05804	0.469899	0.0168479	0.508022	7.44647e-11	0.132475	1.20022e-26	Arctic	Kinesin-associated protein (KAP)
PF03485	0.360701	0.128801	0.510459	2.30378e-05	0.0097836	4.34952e-25	Arctic	Arginyl tRNA synthetase N terminal domain
PF05822	0.472921	0.108349	0.418583	0.000127462	0.039675	2.39055e-28	Arctic	Pyrimidine 5'-nucleotidase (UMPH-1)
PF12327	0.3513	0.198057	0.450623	0.000275076	0.00981776	2.14269e-17	Arctic	FtsZ family, C-terminal domain
PF00204	0.432348	0.228301	0.339009	7.50935e-05	0.138988	3.57005e-10	Arctic	DNA gyrase B
PF01266	0.474301	0.159315	0.366379	5.68126e-09	0.0154794	7.78812e-20	Arctic	FAD dependent oxidoreductase
PF01264	0.373128	0.149743	0.475851	0.000138567	0.346857	1.33119e-14	Arctic	Chorismate synthase
PF02797	0.477241	0.0877252	0.433319	1.00546e-05	0.268051	1.14387e-27	Arctic	Chalcone and stilbene synthases, C-terminal domain
PF04928	0.449745	0.0905158	0.447931	2.7104e-06	0.833196	2.49286e-23	Arctic	Poly(A) polymerase central domain
PF02790	0.222869	0.459689	0.317441	0.000139477	0.00130342	2.30472e-15	Arctic	Cytochrome C oxidase subunit II, transmembrane domain
PF04926	0.449745	0.0905158	0.447931	2.7104e-06	0.833196	2.49286e-23	Arctic	Poly(A) polymerase predicted RNA binding domain
PF12418	0.274817	0.176582	0.548547	0.000784845	0.00780241	3.79264e-17	Arctic	Acyl-CoA dehydrogenase N terminal
PF07842	0.627367	0.0413061	0.329229	2.52947e-06	0.350807	6.07543e-20	Arctic	GC-rich sequence DNA-binding factor-like protein
PF03435	0.450369	0.191442	0.357994	3.46173e-07	0.0743624	4.46174e-14	Arctic	Saccharopine dehydrogenase NADP binding domain
PF05008	0.490031	0.183675	0.325722	0.000412293	0.0601852	1.54265e-05	Arctic	Vesicle transport v-SNARE protein N-terminus
PF00173	0.379133	0.206415	0.414294	6.93878e-06	0.590046	2.50999e-18	Arctic	Cytochrome b5-like Heme/Steroid binding domain
PF00046	0.378053	0.150177	0.471746	9.46716e-07	0.0552898	2.40412e-23	Arctic	Homeodomain
PF02861	0.410608	0.132742	0.456649	9.55501e-09	0.00185936	2.28331e-28	Arctic	Clp amino terminal domain, pathogenicity island component
PF01940	0.505552	0.112544	0.374643	0.000828471	0.75712	6.26189e-13	Arctic	Integral membrane protein DUF92
PF01938	0.607927	0.0763812	0.315418	3.71146e-08	0.0403627	1.20143e-22	Arctic	TRAM domain
PF14746	0.408888	0.127352	0.462022	3.48836e-05	0.234794	1.30814e-20	Arctic	WASH complex subunit 7, C-terminal
PF01926	0.441721	0.237496	0.320782	8.65393e-05	0.00134531	1.29582e-05	Arctic	50S ribosome-binding GTPase
PF14745	0.408888	0.127352	0.462022	3.48836e-05	0.234794	1.30814e-20	Arctic	WASH complex subunit 4, N-terminal
PF14744	0.408888	0.127352	0.462022	3.48836e-05	0.234794	1.30814e-20	Arctic	WASH complex subunit 7
PF14740	0.517363	0.214894	0.267397	0.000265735	0.0496367	8.32732e-09	Arctic	Domain of unknown function (DUF4471)
PF02852	0.352649	0.222625	0.424723	0.000350726	0.00552856	9.07269e-19	Arctic	Pyridine nucleotide-disulphide oxidoreductase, dimerisation domain
PF03031	0.35639	0.196582	0.447024	4.73582e-05	0.00421816	1.76666e-24	Arctic	NLI interacting factor-like phosphatase
PF03074	0.433151	0.095832	0.469225	3.11082e-08	0.676385	9.03754e-31	Arctic	Glutamate-cysteine ligase
PF02995	0.625645	0.0110482	0.360766	1.24526e-12	0.202322	3.77168e-28	Arctic	Protein of unknown function (DUF229)
PF00118	0.406952	0.145947	0.44706	3.72964e-10	0.394663	1.00926e-30	Arctic	TCP-1/cpn60 chaperonin family
PF14739	0.360554	0.150798	0.488487	0.000609661	0.0176503	5.36578e-22	Arctic	Domain of unknown function (DUF4472)
PF14737	0.517363	0.214894	0.267397	0.000265735	0.0496367	8.32732e-09	Arctic	Domain of unknown function (DUF4470)
PF08246	0.410819	0.271766	0.317408	0.000951386	0.0250147	1.70641e-06	Arctic	Cathepsin propeptide inhibitor domain (I29)
PF05691	0.446914	0.173309	0.378022	0.000143317	0.338809	5.42842e-09	Arctic	Raffinose synthase or seed imbibition protein Sip1
PF09359	0.369478	0.106115	0.517541	9.62408e-06	0.285571	6.11489e-16	Arctic	VTC domain
PF14707	0.258982	0.625908	0.102432	0.000298511	0.815593	9.01931e-14	Arctic	C-terminal region of aryl-sulfatase
PF10309	0.67321	0.0863679	0.240222	7.52653e-05	0.0080566	1.2068e-08	Arctic	Nuclear cap-binding protein subunit 3
PF10312	0.406676	0.0924081	0.500536	1.43622e-07	0.0753641	2.16973e-32	Arctic	Conserved mid region of cactin
PF03109	0.372388	0.163418	0.464192	5.95246e-07	0.00393589	2.99379e-28	Arctic	ABC1 atypical kinase-like domain
PF03114	0.463393	0.134377	0.399494	1.13741e-05	0.510845	1.26224e-17	Arctic	BAR domain
PF01788	0.822279	0.0710789	0.10664	0.000484877	0.00697849	5.9147e-14	Arctic	PsbJ
PF10243	0.569889	0.144696	0.285388	4.33754e-05	0.00191055	2.88273e-11	Arctic	Microtubule-binding protein MIP-T3 CH-like domain
PF14671	0.588845	0.163065	0.248064	0.000109262	0.00136589	3.90329e-05	Arctic	Dual specificity protein phosphatase, N-terminal half
PF10127	0.582658	0.0110326	0.397256	6.9507e-08	0.350115	3.48785e-15	Arctic	RNA repair pathway DNA polymerase beta family
PF08373	0.505059	0.200605	0.29425	0.000192835	0.0448717	2.88422e-06	Arctic	RAP domain
PF00067	0.39266	0.154764	0.452483	3.63055e-05	0.0523507	8.16495e-23	Arctic	Cytochrome P450
PF00070	0.347989	0.227491	0.424518	0.000346683	0.00830659	4.50667e-19	Arctic	Pyridine nucleotide-disulphide oxidoreductase
PF05641	0.555017	0.181395	0.263381	0.000528624	0.0308962	1.62442e-05	Arctic	Agenet domain
PF02885	0.52296	0.118398	0.358633	5.7219e-07	0.00110773	6.41955e-09	Arctic	Glycosyl transferase family, helical bundle domain
PF09511	0.478586	0.0555968	0.453935	3.72373e-06	0.803593	1.66432e-12	Arctic	RNA ligase
PF09587	0.434509	0.0433533	0.507698	0.000185959	0.492756	4.52237e-15	Arctic	Bacterial capsule synthesis protein PGA_cap
PF09732	0.357708	0.152341	0.489933	7.40894e-06	0.0087071	5.59294e-30	Arctic	Cactus-binding C-terminus of cactin protein
PF05649	0.471581	0.189142	0.336502	0.000908271	0.724551	4.85679e-10	Arctic	Peptidase family M13
PF00083	0.430681	0.171617	0.397218	3.48996e-05	0.748808	4.32685e-20	Arctic	Sugar (and other) transporter
PF08443	0.50032	0.0930313	0.403995	5.02086e-07	0.319472	1.04052e-21	Arctic	RimK-like ATP-grasp domain
PF02210	0.558774	0.0420994	0.395165	2.50418e-09	0.207012	6.21163e-14	Arctic	Laminin G domain
PF01979	0.341991	0.132	0.525491	2.6572e-06	0.149606	1.6966e-23	Arctic	Amidohydrolase family
PF09773	0.482547	0.085161	0.42786	2.57497e-08	0.619639	3.37871e-25	Arctic	Meckelin (Transmembrane protein 67)
PF02212	0.536673	0.047439	0.413693	1.82988e-09	0.47802	1.78397e-31	Arctic	Dynamin GTPase effector domain
PF02866	0.473773	0.225146	0.301076	0.000151583	0.00587329	9.88565e-05	Arctic	lactate/malate dehydrogenase, alpha/beta C-terminal domain
PF02042	0.567159	0.13462	0.298104	7.08484e-05	0.00780002	2.52826e-05	Arctic	RWP-RK domain
PF09794	0.472341	0.141702	0.376156	7.29696e-05	0.619639	3.87224e-13	Arctic	Transport protein Avl9
PF02036	0.633688	0.0414286	0.324847	2.34451e-09	0.00288085	1.91296e-21	Arctic	SCP-2 sterol transfer family
PF08392	0.477241	0.0877252	0.433319	1.00546e-05	0.268051	1.14387e-27	Arctic	FAE1/Type III polyketide synthase-like protein
PF02005	0.412125	0.110113	0.459153	3.17647e-05	0.775113	2.48015e-16	Arctic	N2,N2-dimethylguanosine tRNA methyltransferase
PF09826	0.46765	0.230869	0.301052	0.000270666	0.0374061	9.89595e-07	Arctic	Beta propeller domain
PF00097	0.42752	0.0970481	0.474793	2.46865e-08	0.43533	5.65954e-29	Arctic	Zinc finger, C3HC4 type (RING finger)
PF09414	0.546222	0.0279812	0.417965	5.30856e-08	0.973999	1.06687e-29	Arctic	RNA ligase
PF09409	0.445151	0.203764	0.351075	2.40825e-06	0.0132862	3.44195e-11	Arctic	PUB domain
PF02074	0.319057	0.125703	0.555109	0.000260332	0.0252638	1.01478e-19	Arctic	Carboxypeptidase Taq (M32) metallopeptidase
PF09286	0.466933	0.167764	0.365232	8.05187e-08	0.0551403	3.09689e-18	Arctic	Pro-kumamolisin, activation domain
PF10415	0.421168	0.168529	0.405798	5.29277e-05	0.968128	5.24951e-15	Arctic	Fumarase C C-terminus
PF10436	0.399802	0.22996	0.368424	0.000908271	0.307493	4.74174e-07	Arctic	Mitochondrial branched-chain alpha-ketoacid dehydrogenase kinase
PF05066	0.332228	0.0219592	0.645279	5.94861e-17	0.0939092	1.0139e-29	Arctic	HB1, ASXL, restriction endonuclease HTH domain
PF01134	0.441359	0.137769	0.417961	3.76066e-05	0.358322	2.12197e-18	Arctic	Glucose inhibited division protein A
PF10602	0.372003	0.209027	0.417878	0.000485272	0.52024	1.4176e-10	Arctic	26S proteasome subunit RPN7
PF10609	0.419644	0.151033	0.427115	6.26791e-05	0.377905	4.06047e-20	Arctic	NUBPL iron-transfer P-loop NTPase
PF02317	0.419354	0.15584	0.419653	3.82586e-05	0.917847	4.72118e-16	Arctic	NAD/NADP octopine/nopaline dehydrogenase, alpha-helical domain
PF01585	0.535803	0.0697744	0.392931	1.36765e-05	0.306326	9.78555e-29	Arctic	G-patch domain
PF03275	0.484643	0.0878807	0.426952	2.32213e-08	0.398996	1.12594e-32	Arctic	UDP-galactopyranose mutase
PF01565	0.51656	0.12061	0.362524	0.00073774	0.73782	9.07074e-23	Arctic	FAD binding domain
PF03283	0.428291	0.209214	0.360583	0.000461178	0.820398	4.85107e-12	Arctic	Pectinacetylesterase
PF01556	0.412361	0.206278	0.381331	1.0726e-05	0.23081	3.09613e-11	Arctic	DnaJ C terminal domain
PF01554	0.418911	0.146899	0.432984	1.12829e-06	0.644415	6.60307e-15	Arctic	MatE
PF08125	0.51593	0.127518	0.356454	5.63281e-07	0.0297028	1.34564e-20	Arctic	Mannitol dehydrogenase C-terminal domain
PF08540	0.849809	0.0436241	0.106509	6.20546e-06	0.0102986	1.14145e-10	Arctic	Hydroxymethylglutaryl-coenzyme A synthase C terminal
PF11152	0.465644	0.111106	0.418224	0.000502267	0.247407	2.96776e-05	Arctic	Cofactor assembly of complex C subunit B, CCB2/CCB4
PF00183	0.389012	0.161267	0.449693	5.0351e-07	0.238029	1.02926e-24	Arctic	Hsp90 protein
PF11218	0.201227	0.561932	0.226395	0.000323222	0.833754	1.06571e-09	Arctic	Protein of unknown function (DUF3011)
PF00187	0.527801	0.175379	0.296718	1.45196e-05	0.0678946	4.99327e-08	Arctic	Chitin recognition protein
PF11262	0.396135	0.0960062	0.507361	2.06573e-05	0.113814	2.24317e-28	Arctic	Transcription factor/nuclear export subunit protein 2
PF00191	0.457829	0.148897	0.391473	9.79019e-06	0.703051	5.87276e-17	Arctic	Annexin
PF05761	0.538332	0.155475	0.306157	1.20327e-06	0.00686434	1.42322e-11	Arctic	5' nucleotidase family
PF08016	0.417562	0.209091	0.37211	4.75862e-05	0.744147	1.4615e-13	Arctic	Polycystin cation channel
PF01494	0.392373	0.179271	0.428116	8.28029e-06	0.452345	2.75268e-17	Arctic	FAD binding domain
PF11443	0.532354	0.00586652	0.461328	8.28368e-11	0.816819	2.62611e-36	Arctic	Domain of unknown function (DUF2828)
PF05011	0.424224	0.148478	0.41481	0.000360059	0.533456	4.56156e-08	Arctic	Lariat debranching enzyme, C-terminal domain
PF05746	0.360701	0.128801	0.510459	2.30378e-05	0.0097836	4.34952e-25	Arctic	DALR anticodon binding domain
PF01778	0.126236	0.782698	0.0907979	0.00056873	0.164915	6.12381e-11	Arctic	Ribosomal L28e protein family
PF01619	0.557392	0.0619448	0.377611	2.14736e-08	0.367258	2.88014e-20	Arctic	Proline dehydrogenase
PF00170	0.421724	0.211223	0.366952	0.000108777	0.133898	3.4122e-08	Arctic	bZIP transcription factor
PF05140	0.752251	0.124882	0.119732	0.00025956	0.557889	1.5874e-14	Arctic	ResB-like family
PF10458	0.408885	0.145193	0.445439	3.36459e-05	0.19411	2.3689e-21	Arctic	Valyl tRNA synthetase tRNA binding arm
PF01758	0.357857	0.198945	0.442205	0.000266852	0.32572	1.73758e-11	Arctic	Sodium Bile acid symporter family
PF09325	0.499379	0.0569992	0.442779	8.2817e-10	0.220775	4.95856e-31	Arctic	Vps5 C terminal like
PF05093	0.468882	0.158982	0.371961	7.3343e-07	0.0253326	4.10275e-10	Arctic	Cytokine-induced anti-apoptosis inhibitor 1, Fe-S biogenesis
PF05707	0.423333	0.0337842	0.521147	2.13757e-08	0.703439	7.35902e-21	Arctic	Zonular occludens toxin (Zot)
PF01751	0.43128	0.2255	0.342891	3.36459e-05	0.142683	1.23718e-10	Arctic	Toprim domain
PF00057	0.442978	0.118431	0.43524	3.87332e-07	0.833196	1.21944e-24	Arctic	Low-density lipoprotein receptor domain class A
PF01746	0.447319	0.0623778	0.489909	5.54157e-08	0.075559	8.62053e-31	Arctic	tRNA (Guanine-1)-methyltransferase
PF10498	0.42647	0.107537	0.465959	3.81561e-05	0.00722489	1.2672e-23	Arctic	Intra-flagellar transport protein 57
PF01734	0.388319	0.225198	0.383796	0.000434045	0.594986	3.79452e-11	Arctic	Patatin-like phospholipase
PF09298	0.53531	0.0733066	0.388086	1.21804e-05	0.409598	2.92338e-21	Arctic	Fumarylacetoacetase N-terminal
PF10502	0.430787	0.226624	0.3424	0.000146092	0.0484704	1.01516e-05	Arctic	Signal peptidase, peptidase S26
PF08144	0.423537	0.0889387	0.478218	0.000534599	0.77661	4.00004e-13	Arctic	CPL (NUC119) domain
PF14604	0.331553	0.0399657	0.628441	7.33741e-10	0.00629701	2.45727e-32	Arctic	Variant SH3 domain
PF01694	0.507135	0.134771	0.351808	0.000598846	0.239442	6.92057e-08	Arctic	Rhomboid family
PF03188	0.434041	0.161349	0.400856	5.10508e-07	0.910014	5.15234e-23	Arctic	Eukaryotic cytochrome b561
PF00155	0.43033	0.189075	0.380586	7.18038e-08	0.0316786	1.77592e-15	Arctic	Aminotransferase class I and II
PF10557	0.406065	0.137035	0.456699	3.22109e-09	0.191162	2.686e-30	Arctic	Cullin protein neddylation domain
PF05721	0.474929	0.197818	0.327252	1.30642e-06	0.00352297	1.9374e-09	Arctic	Phytanoyl-CoA dioxygenase (PhyH)
PF00162	0.421751	0.188242	0.389676	0.000250165	0.921389	2.38875e-13	Arctic	Phosphoglycerate kinase
PF00168	0.379342	0.132058	0.488598	5.19695e-08	0.00961411	1.53412e-29	Arctic	C2 domain
PF01636	0.370612	0.159547	0.469837	3.22774e-07	0.00533381	6.26345e-27	Arctic	Phosphotransferase enzyme family
PF10588	0.341877	0.233522	0.424472	4.2967e-05	0.0548146	1.58073e-21	Arctic	NADH-ubiquinone oxidoreductase-G iron-sulfur binding region
PF08151	0.569479	0.0503393	0.380148	1.68005e-10	0.0313271	8.81115e-32	Arctic	FerI (NUC094) domain
PF00284	0.789646	0.140937	0.0693855	1.96321e-05	0.0562731	4.22674e-11	Arctic	Lumenal portion of Cytochrome b559, alpha (gene psbE) subunit
PF03661	0.498997	0.19562	0.304492	0.000947629	0.103606	2.93495e-06	Arctic	Transmembrane protein 33/Nucleoporin POM33
PF13371	0.390129	0.15725	0.452583	1.62593e-06	0.0810885	8.25905e-29	Arctic	Tetratricopeptide repeat
PF00387	0.492218	0.164378	0.342262	0.000446504	0.747359	2.00451e-14	Arctic	Phosphatidylinositol-specific phospholipase C, Y domain
PF00390	0.402393	0.130823	0.466543	3.1587e-08	0.124514	6.11903e-28	Arctic	Malic enzyme, N-terminal domain
PF00737	0.706715	0.194988	0.0978197	0.000473992	0.623712	8.86105e-13	Arctic	Photosystem II 10 kDa phosphoprotein
PF00735	0.455282	0.177449	0.365356	5.29273e-05	0.317221	4.53463e-11	Arctic	Septin
PF13410	0.466055	0.172793	0.360981	1.92921e-06	0.43204	1.28705e-18	Arctic	Glutathione S-transferase, C-terminal domain
PF04610	0.450057	0.145135	0.403968	1.73688e-06	0.403302	1.75522e-16	Arctic	TrbL/VirB6 plasmid conjugal transfer protein
PF08616	0.472341	0.141702	0.376156	7.29696e-05	0.619639	3.87224e-13	Arctic	Stabilization of polarity axis
PF06966	0.142557	0.764101	0.0932265	0.000584286	0.10509	1.09908e-15	Arctic	Protein of unknown function (DUF1295)
PF13418	0.464525	0.166478	0.368995	6.74705e-09	0.0106867	1.74349e-20	Arctic	Galactose oxidase, central domain
PF00724	0.422397	0.165687	0.409517	2.03495e-07	0.782259	1.67164e-20	Arctic	NADH:flavin oxidoreductase / NADH oxidase family
PF00717	0.430787	0.226624	0.3424	0.000146092	0.0484704	1.01516e-05	Arctic	Peptidase S24-like
PF00750	0.360701	0.128801	0.510459	2.30378e-05	0.0097836	4.34952e-25	Arctic	tRNA synthetases class I (R)
PF13840	0.364168	0.120147	0.515662	2.85492e-06	0.0150879	7.84468e-28	Arctic	ACT domain
PF13429	0.438145	0.146048	0.412248	6.44991e-06	0.989284	5.0551e-20	Arctic	Tetratricopeptide repeat
PF00403	0.432607	0.160135	0.406415	1.59896e-07	0.692137	2.03812e-22	Arctic	Heavy-metal-associated domain
PF00696	0.409073	0.118696	0.471752	8.34253e-08	0.450246	3.59063e-29	Arctic	Amino acid kinase family
PF13450	0.373026	0.143048	0.483926	5.99796e-09	0.00126294	9.42199e-32	Arctic	NAD(P)-binding Rossmann-like domain
PF13458	0.476847	0.148307	0.374249	0.000927263	0.607791	1.48034e-12	Arctic	Periplasmic binding protein
PF00413	0.4313	0.132667	0.435919	1.55564e-05	0.0547288	1.42577e-21	Arctic	Matrixin
PF00686	0.385993	0.187405	0.423415	0.000259713	0.510845	2.48284e-15	Arctic	Starch binding domain
PF04577	0.548133	0.0936903	0.356343	1.33412e-06	0.989944	1.05156e-20	Arctic	Glycosyltransferase 61
PF02731	0.533034	0.0724745	0.394321	6.22513e-08	0.0399022	2.39616e-32	Arctic	SKIP/SNW domain
PF13476	0.415349	0.174014	0.410095	5.53825e-05	0.184518	1.02012e-21	Arctic	AAA domain
PF05499	0.519334	0.12029	0.360314	7.23651e-09	0.0407622	7.88573e-25	Arctic	DNA methyltransferase 1-associated protein 1 (DMAP1)
PF00704	0.490136	0.14839	0.360281	3.39837e-05	0.954098	9.98405e-16	Arctic	Glycosyl hydrolases family 18
PF00432	0.427205	0.117157	0.45493	2.70404e-07	0.114692	2.43086e-27	Arctic	Prenyltransferase and squalene oxidase repeat
PF13393	0.503184	0.137815	0.357182	4.40343e-06	0.478658	5.13598e-20	Arctic	Histidyl-tRNA synthetase
PF00384	0.341877	0.233522	0.424472	4.2967e-05	0.0548146	1.58073e-21	Arctic	Molybdopterin oxidoreductase
PF05995	0.502489	0.220045	0.277383	0.000134048	0.0185023	1.62673e-08	Arctic	Cysteine dioxygenase type I
PF07173	0.482376	0.146187	0.370551	2.38425e-05	0.49872	1.04655e-18	Arctic	Glycine-rich domain-containing protein-like
PF13249	0.428491	0.137011	0.431053	5.26994e-06	0.434023	5.03422e-24	Arctic	Squalene-hopene cyclase N-terminal domain
PF02769	0.358047	0.165501	0.476449	0.000175206	0.00107746	5.01326e-25	Arctic	AIR synthase related protein, C-terminal domain
PF07059	0.37881	0.177127	0.442868	7.04121e-05	0.327466	3.62367e-18	Arctic	Protein ENHANCED DISEASE RESISTANCE 2, C-terminal
PF06011	0.542919	0.105669	0.351302	6.73418e-08	0.0351436	4.90641e-18	Arctic	Transient receptor potential (TRP) ion channel
PF00378	0.368399	0.182033	0.447287	0.000629544	0.855585	1.72334e-10	Arctic	Enoyl-CoA hydratase/isomerase
PF03989	0.424795	0.0814579	0.492464	3.30414e-07	0.146617	2.36598e-24	Arctic	DNA gyrase C-terminal domain, beta-propeller
PF00815	0.539069	0.103157	0.354771	0.000359818	0.395194	1.51379e-15	Arctic	Histidinol dehydrogenase
PF00012	0.46895	0.144814	0.386229	2.22521e-08	0.138988	1.15878e-24	Arctic	Hsp70 protein
PF13304	0.417248	0.0972508	0.485341	6.89353e-10	0.127553	2.83383e-29	Arctic	AAA domain, putative AbiEii toxin, Type IV TA system
PF00385	0.414819	0.22497	0.360115	0.000192886	0.114929	7.64531e-07	Arctic	Chromo (CHRromatin Organisation MOdifier) domain
PF05426	0.611866	0.105757	0.279917	0.00065877	0.437591	7.21035e-09	Arctic	Alginate lyase
PF00804	0.54576	0.0776005	0.375889	5.53095e-07	0.142964	6.21256e-27	Arctic	Syntaxin
PF07039	0.446608	0.159908	0.387913	8.14583e-05	0.281402	2.44923e-05	Arctic	SGF29 tudor-like domain
PF08757	0.411143	0.136102	0.451545	5.30885e-05	0.1137	1.21715e-05	Arctic	CotH kinase protein
PF00795	0.472628	0.13328	0.392696	0.000733997	0.462638	5.83053e-17	Arctic	Carbon-nitrogen hydrolase
PF04045	0.47656	0.191666	0.33148	0.000652475	0.0445852	1.09835e-05	Arctic	Arp2/3 complex, 34 kD subunit p34-Arc
PF13360	0.624946	0.0926133	0.282327	1.19632e-06	0.00586114	1.17815e-09	Arctic	PQQ-like domain
PF00787	0.43511	0.10058	0.4637	3.72964e-10	0.464775	9.74633e-33	Arctic	PX domain
PF00782	0.404036	0.247014	0.348671	0.000867859	0.158416	3.5035e-05	Arctic	Dual specificity phosphatase, catalytic domain
PF00766	0.304889	0.161041	0.534042	0.000523853	0.00644602	4.84461e-20	Arctic	Electron transfer flavoprotein FAD-binding domain
PF00010	0.123358	0.0240629	0.852347	0.000120559	0.0531947	1.62373e-24	Arctic	Helix-loop-helix DNA-binding domain
PF00762	0.470046	0.165457	0.363889	2.09638e-05	0.229391	7.31251e-15	Arctic	Ferrochelatase
PF13328	0.494106	0.184134	0.321476	0.000448994	0.152081	4.52582e-11	Arctic	HD domain
PF04564	0.38532	0.182447	0.432148	1.17654e-06	0.367258	1.33933e-20	Arctic	U-box domain
PF00667	0.501337	0.13373	0.363941	1.62593e-06	0.219925	3.74324e-19	Arctic	FAD binding domain
PF00665	0.595518	0.0801301	0.323912	3.50232e-05	0.0724921	9.5214e-06	Arctic	Integrase core domain
PF00567	0.505617	0.13613	0.357727	4.42652e-05	0.152787	8.93745e-15	Arctic	Tudor domain
PF06565	0.502	0.18831	0.309615	1.7018e-05	0.0343859	6.53653e-11	Arctic	DM10 domain
PF00565	0.426657	0.207914	0.365033	0.000192835	0.219008	8.39588e-09	Arctic	Staphylococcal nuclease homologue
PF00564	0.620068	0.0630893	0.316828	1.67002e-08	0.0528352	4.1701e-28	Arctic	PB1 domain
PF00561	0.384758	0.204287	0.407762	0.000175206	0.850602	2.61687e-16	Arctic	alpha/beta hydrolase fold
PF00560	0.384116	0.207392	0.408462	0.000434639	0.118321	1.49476e-14	Arctic	Leucine Rich Repeat
PF06544	0.383989	0.074712	0.541273	5.78963e-09	0.0119252	1.84272e-32	Arctic	Small nuclear ribonucleoprotein Prp3, C-terminal domain
PF00550	0.404821	0.179593	0.415576	2.81608e-05	0.0682831	2.44471e-19	Arctic	Phosphopantetheine attachment site
PF02696	0.47736	0.153158	0.369138	2.85206e-06	0.0956585	7.01806e-17	Arctic	Protein adenylyltransferase SelO
PF06485	0.555192	0.191215	0.253575	0.000327513	0.00461571	1.94213e-05	Arctic	RNA-binding protein Tab2/Atab2 N terminal
PF00478	0.798283	0.061688	0.139193	0.000561468	0.992323	2.21018e-14	Arctic	IMP dehydrogenase / GMP reductase domain
PF00569	0.590502	0.063687	0.345781	3.38653e-09	0.12018	8.8275e-30	Arctic	Zinc finger, ZZ type
PF04502	0.441003	0.0596502	0.471536	5.26994e-06	0.727303	1.00731e-10	Arctic	Saf4/Yju2 protein
PF00521	0.381639	0.253422	0.362386	0.00025956	0.813941	2.2486e-10	Arctic	DNA gyrase/topoisomerase IV, subunit A
PF13634	0.524787	0.040781	0.430308	2.74099e-07	0.256177	4.45504e-18	Arctic	Nucleoporin FG repeat region
PF00515	0.38955	0.15649	0.453948	1.53352e-08	0.0322738	6.37136e-31	Arctic	Tetratricopeptide repeat
PF06434	0.348832	0.0982779	0.552847	1.86837e-07	0.0277548	3.8288e-28	Arctic	Aconitate hydratase 2 N-terminus
PF02677	0.571222	0.116989	0.30719	0.000662625	0.211675	1.70595e-06	Arctic	Epoxyqueuosine reductase QueH
PF13738	0.426526	0.180441	0.392584	6.06438e-06	0.844571	2.6105e-17	Arctic	Pyridine nucleotide-disulphide oxidoreductase
PF13671	0.546222	0.0279812	0.417965	5.30856e-08	0.973999	1.06687e-29	Arctic	AAA domain
PF00498	0.463017	0.197719	0.338989	3.36131e-05	0.0648773	3.64756e-08	Arctic	FHA domain
PF06418	0.461195	0.180197	0.358472	0.000109575	0.0259693	4.49499e-07	Arctic	CTP synthase N-terminus
PF15275	0.528803	0.138285	0.332317	0.000300703	0.0529768	4.6824e-07	Arctic	PEHE domain
PF13704	0.503893	0.153372	0.340344	8.46569e-05	0.466234	1.5593e-10	Arctic	Glycosyl transferase family 2
PF08644	0.431941	0.127271	0.440576	0.00031608	0.0673354	3.33625e-22	Arctic	FACT complex subunit (SPT16/CDC68)
PF06624	0.419796	0.160846	0.418074	2.51111e-05	0.919621	4.5364e-20	Arctic	Ribosome associated membrane protein RAMP4
PF04515	0.401526	0.121602	0.476834	7.75545e-09	0.043607	6.35332e-27	Arctic	Plasma-membrane choline transporter
PF13594	0.324853	0.137397	0.537168	0.000853516	0.139632	2.89619e-19	Arctic	Amidohydro_5
PF04116	0.365343	0.229784	0.403532	0.000434639	0.948862	2.59209e-10	Arctic	Fatty acid hydroxylase
PF13507	0.418766	0.062688	0.51835	1.76186e-05	0.0308446	4.20464e-29	Arctic	CobB/CobQ-like glutamine amidotransferase domain
PF00656	0.618574	0.120481	0.260898	7.83144e-06	0.0033771	1.50201e-08	Arctic	Caspase domain
PF06206	0.676133	0.0329278	0.290658	3.91095e-10	0.042163	1.61226e-25	Arctic	CpeT/CpcT family (DUF1001)
PF13510	0.341877	0.233522	0.424472	4.2967e-05	0.0548146	1.58073e-21	Arctic	2Fe-2S iron-sulfur cluster binding domain
PF13516	0.496974	0.160657	0.34234	2.32016e-08	0.32482	1.17478e-22	Arctic	Leucine Rich repeat
PF04551	0.360254	0.138133	0.501558	9.1178e-06	0.0329726	2.1104e-22	Arctic	GcpE protein
PF04129	0.384812	0.0873115	0.527828	0.000874136	0.00968219	8.46974e-30	Arctic	Vps52/Sac2 family, coiled-coil
PF04130	0.507423	0.101253	0.391236	9.47041e-08	0.0276993	8.20051e-16	Arctic	Gamma tubulin complex component C-terminal
PF00629	0.419917	0.190704	0.38937	0.000908271	0.0554375	1.12171e-13	Arctic	MAM domain, meprin/A5/mu
PF00628	0.389507	0.204418	0.405694	1.80299e-07	0.778707	1.17715e-21	Arctic	PHD-finger
PF13535	0.479857	0.17138	0.348694	1.7018e-05	0.0468929	8.00093e-12	Arctic	ATP-grasp domain
PF00454	0.449926	0.121228	0.427697	2.0814e-07	0.805766	1.40131e-25	Arctic	Phosphatidylinositol 3- and 4-kinase
PF00456	0.419435	0.162151	0.418124	7.96865e-05	0.88086	5.32196e-15	Arctic	Transketolase, thiamine diphosphate binding domain
PF00621	0.312437	0.184513	0.503023	0.000413677	0.00753666	1.49089e-15	Arctic	RhoGEF domain
PF00612	0.389108	0.242602	0.367863	0.00062049	0.707268	3.3831e-10	Arctic	IQ calmodulin-binding motif
PF00611	0.633688	0.0414286	0.324847	2.34451e-09	0.00288085	1.91296e-21	Arctic	Fes/CIP4, and EFC/F-BAR homology domain
PF00591	0.52296	0.118398	0.358633	5.7219e-07	0.00110773	6.41955e-09	Arctic	Glycosyl transferase family, a/b domain
PF00590	0.507423	0.101253	0.391236	9.47041e-08	0.0276993	8.20051e-16	Arctic	Tetrapyrrole (Corrin/Porphyrin) Methylases
PF00464	0.500464	0.163215	0.336319	9.04579e-08	0.00161559	6.95149e-14	Arctic	Serine hydroxymethyltransferase
PF13561	0.502459	0.216817	0.280721	0.000228693	0.00417117	0.000227115	Arctic	Enoyl-(Acyl carrier protein) reductase
PF02714	0.372412	0.129276	0.498098	2.62591e-05	0.0305734	1.21606e-19	Arctic	Calcium-dependent channel, 7TM region, putative phosphate
PF00585	0.357857	0.198945	0.442205	0.000266852	0.32572	1.73758e-11	Arctic	C-terminal regulatory domain of Threonine dehydratase
PF13579	0.402576	0.0846489	0.511572	5.47881e-06	0.178459	2.83824e-22	Arctic	Glycosyl transferase 4-like domain
PF13589	0.389049	0.164236	0.446674	1.1951e-06	0.315401	2.14662e-22	Arctic	Histidine kinase-, DNA gyrase B-, and HSP90-like ATPase
PF13243	0.428491	0.137011	0.431053	5.26994e-06	0.434023	5.03422e-24	Arctic	Squalene-hopene cyclase C-terminal domain
PF00013	0.404052	0.232951	0.362884	1.65955e-05	0.173338	3.04481e-12	Arctic	KH domain
PF02197	0.470021	0.207304	0.322489	0.000830795	0.0569755	1.3051e-07	Arctic	Regulatory subunit of type II PKA R-subunit
PF12806	0.274817	0.176582	0.548547	0.000784845	0.00780241	3.79264e-17	Arctic	Acetyl-CoA dehydrogenase C-terminal like
PF00291	0.451482	0.19154	0.356976	3.19247e-07	0.00527259	7.77756e-16	Arctic	Pyridoxal-phosphate dependent enzyme
PF00995	0.413742	0.142773	0.441471	3.32565e-06	0.492756	3.06882e-20	Arctic	Sec1 family
PF02518	0.442192	0.20361	0.354181	3.09204e-07	0.0272637	4.30943e-12	Arctic	Histidine kinase-, DNA gyrase B-, and HSP90-like ATPase
PF00986	0.50635	0.105152	0.387534	1.86837e-07	0.195431	1.43468e-21	Arctic	DNA gyrase B subunit, carboxyl terminus
PF07699	0.514398	0.107056	0.378421	1.02943e-08	0.34814	2.27544e-25	Arctic	Tyrosine-protein kinase ephrin type A/B receptor-like
PF13923	0.480159	0.0578323	0.460444	7.61677e-10	0.88086	1.04838e-31	Arctic	Zinc finger, C3HC4 type (RING finger)
PF00348	0.420965	0.204617	0.374082	0.000561813	0.41067	4.90133e-12	Arctic	Polyprenyl synthetase
PF02515	0.482726	0.0265281	0.48872	1.19073e-08	0.602789	1.15988e-32	Arctic	CoA-transferase family III
PF12773	0.552341	0.139808	0.3071	0.000750456	0.205003	6.98523e-05	Arctic	Double zinc ribbon
PF08783	0.474454	0.0893202	0.429757	1.23719e-07	0.905771	2.44905e-26	Arctic	DWNN domain
PF03747	0.292432	0.425973	0.27748	1.58154e-07	0.19377	1.4942e-13	Arctic	ADP-ribosylglycohydrolase
PF02779	0.386504	0.164486	0.448991	8.44097e-05	0.0958367	3.95079e-22	Arctic	Transketolase, pyrimidine binding domain
PF07496	0.611587	0.0394497	0.348883	6.59822e-09	0.0317481	1.14396e-31	Arctic	CW-type Zinc Finger
PF08647	0.401429	0.205133	0.387326	0.00040741	0.751263	1.96873e-11	Arctic	BRE1 E3 ubiquitin ligase
PF00919	0.543741	0.117287	0.338409	2.26473e-06	0.113402	5.65429e-18	Arctic	Uncharacterized protein family UPF0004
PF03840	0.459474	0.456492	0.0840275	0.00074132	0.00319416	0.000122394	Arctic	Preprotein translocase SecG subunit
PF00023	0.466635	0.191095	0.342217	1.04918e-06	0.387458	4.67212e-20	Arctic	Ankyrin repeat
PF13932	0.441359	0.137769	0.417961	3.76066e-05	0.358322	2.12197e-18	Arctic	tRNA modifying enzyme MnmG/GidA C-terminal helical bundle
PF07516	0.578618	0.128693	0.292384	7.52349e-07	0.308709	1.16313e-16	Arctic	SecA Wing and Scaffold domain
PF12796	0.44839	0.202672	0.348932	4.55564e-08	0.0738083	3.85101e-21	Arctic	Ankyrin repeats (3 copies)
PF03909	0.467029	0.193026	0.33976	7.56902e-05	0.0403627	1.30439e-06	Arctic	BSD domain
PF00926	0.496226	0.165704	0.33801	1.0726e-05	0.0309256	6.14367e-11	Arctic	3,4-dihydroxy-2-butanone 4-phosphate synthase
PF01031	0.536673	0.047439	0.413693	1.82988e-09	0.47802	1.78397e-31	Arctic	Dynamin central region
PF12895	0.378061	0.119652	0.50228	1.83581e-06	0.00232047	5.79915e-30	Arctic	Anaphase-promoting complex, cyclosome, subunit 3
PF00999	0.430821	0.163606	0.405554	0.000635106	0.0414322	2.42804e-26	Arctic	Sodium/hydrogen exchanger family
PF07534	0.387388	0.128461	0.477534	3.11519e-06	0.792517	2.08409e-15	Arctic	TLD
PF12846	0.423333	0.0337842	0.521147	2.13757e-08	0.703439	7.35902e-21	Arctic	AAA-like domain
PF02770	0.341785	0.201481	0.456731	0.000380429	0.00523105	1.75687e-19	Arctic	Acyl-CoA dehydrogenase, middle domain
PF07298	0.517551	0.0949645	0.385241	8.15376e-06	0.280006	7.43931e-15	Arctic	NnrU protein
PF07647	0.421076	0.114428	0.463983	5.30856e-08	0.541551	3.98401e-27	Arctic	SAM domain (Sterile alpha motif)
PF01130	0.025342	0.955592	0.0182128	0.000158075	0.803593	3.92274e-11	Arctic	CD36 family
PF00350	0.37104	0.191979	0.43682	0.00025956	0.0738083	7.05964e-21	Arctic	Dynamin family
PF02780	0.385501	0.159662	0.454815	7.99869e-05	0.099161	1.43913e-21	Arctic	Transketolase, C-terminal domain
PF12848	0.428077	0.199538	0.37232	1.7484e-06	0.103434	3.86233e-12	Arctic	ABC transporter
PF13864	0.496264	0.163539	0.340072	8.86227e-06	0.0294138	4.56572e-14	Arctic	Calmodulin-binding
PF01043	0.602608	0.0925162	0.303823	4.16409e-08	0.901161	3.24879e-22	Arctic	SecA preprotein cross-linking domain
PF13921	0.486785	0.117753	0.395294	1.0842e-09	0.833196	1.85866e-25	Arctic	Myb-like DNA-binding domain
PF00932	0.501181	0.100178	0.398499	5.81343e-09	0.032545	5.07312e-18	Arctic	Lamin Tail Domain
PF12957	0.642288	0.0745642	0.283136	4.96146e-07	0.00181176	1.66585e-16	Arctic	Domain of unknown function (DUF3846)
PF00930	0.389318	0.103293	0.507005	4.81978e-05	0.052022	4.50096e-19	Arctic	Dipeptidyl peptidase IV (DPP IV) N-terminal region
PF03949	0.402393	0.130823	0.466543	3.1587e-08	0.124514	6.11903e-28	Arctic	Malic enzyme, NAD binding domain
PF12998	0.446608	0.159908	0.387913	8.14583e-05	0.281402	2.44923e-05	Arctic	Inhibitor of growth proteins N-terminal histone-binding
PF00353	0.392044	0.015589	0.590305	3.36095e-12	0.800714	1.52789e-29	Arctic	RTX calcium-binding nonapeptide repeat (4 copies)
PF00888	0.406065	0.137035	0.456699	3.22109e-09	0.191162	2.686e-30	Arctic	Cullin family
PF13181	0.472894	0.138775	0.388	8.34253e-08	0.334948	2.43955e-25	Arctic	Tetratricopeptide repeat
PF10188	0.587522	0.281597	0.130858	0.000160393	8.36161e-12	0.00170509	Southern	Organic solute transport protein 1
PF05179	0.510096	0.185364	0.287791	0.00029704	0.00024335	0.812698	Southern	RNA pol II accessory factor, Cdc73 family, C-terminal
PF00459	0.636686	0.218528	0.144673	1.65029e-06	6.68505e-13	0.0800031	Southern	Inositol monophosphatase family
PF10211	0.62521	0.184694	0.183146	4.98318e-07	7.59342e-10	0.427962	Southern	Axonemal dynein light chain
PF03807	0.519888	0.320361	0.159626	0.000650005	8.51662e-09	0.0346864	Southern	NADP oxidoreductase coenzyme F420-dependent
PF08606	0.593686	0.240796	0.165197	0.000998486	1.91196e-07	0.0916399	Southern	Prp19/Pso4-like
PF06858	0.539893	0.193361	0.266677	2.63712e-05	0.000272596	0.017176	Southern	Nucleolar GTP-binding protein 1 (NOG1)
PF09055	0.0654183	0.403154	0.528786	2.62775e-06	3.88156e-10	0.31773	Southern	Nickel-containing superoxide dismutase
PF02845	0.883662	0.0516448	0.0613377	2.0405e-09	1.75167e-12	0.800485	Southern	CUE domain
PF01238	0.694427	0.164454	0.140996	6.25134e-05	4.72298e-06	0.0108165	Southern	Phosphomannose isomerase type I C-terminal
PF01846	0.546199	0.233007	0.220487	4.30832e-05	1.35163e-06	0.0286496	Southern	FF domain
PF08242	0.593129	0.185303	0.221501	1.56825e-06	2.7836e-07	0.0457298	Southern	Methyltransferase domain
PF04117	0.560696	0.235127	0.20385	4.5716e-07	7.56966e-12	0.581869	Southern	Mpv17 / PMP22 family
PF00641	0.559796	0.235267	0.204693	0.000450245	1.514e-06	0.946722	Southern	Zn-finger in Ran binding protein and others
PF00447	0.52622	0.312239	0.161277	0.000876107	7.85061e-11	0.138466	Southern	HSF-type DNA-binding
PF05173	0.655685	0.216097	0.127761	0.000113588	1.19626e-08	0.0534603	Southern	Dihydrodipicolinate reductase, C-terminus
PF05158	0.735921	0.157722	0.105118	8.62044e-05	6.63273e-08	0.142572	Southern	RNA polymerase Rpc34 subunit
PF08241	0.430581	0.267785	0.301445	0.000523841	3.62481e-05	0.342216	Southern	Methyltransferase domain
PF08240	0.533218	0.280493	0.186285	0.000376998	4.29245e-10	0.00896601	Southern	Alcohol dehydrogenase GroES-like domain
PF07671	0.61514	0.186599	0.198257	4.10815e-05	0.000125339	0.00314646	Southern	Protein of unknown function (DUF1601)
PF01214	0.538997	0.242957	0.21583	5.61558e-05	2.86814e-09	0.723618	Southern	Casein kinase II regulatory subunit
PF00861	0.634926	0.271934	0.0931394	0.000164464	6.58299e-13	0.00139621	Southern	Ribosomal L18 of archaea, bacteria, mitoch. and chloroplast
PF08707	0.527526	0.312014	0.160454	0.00010707	2.69158e-06	0.00435712	Southern	Primase C terminal 2 (PriCT-2)
PF01124	0.7263	0.158933	0.113836	4.1875e-07	1.11495e-12	0.434784	Southern	MAPEG family
PF00480	0.67972	0.17357	0.146437	5.26994e-06	7.68673e-08	0.0282316	Southern	ROK family
PF14933	0.0847516	0.479509	0.435714	0.0004193	3.01602e-13	0.00635774	Southern	CEP19-like protein
PF08954	0.593686	0.240796	0.165197	0.000998486	1.91196e-07	0.0916399	Southern	Trimerisation motif
PF00082	0.559166	0.214908	0.22591	3.7634e-06	3.82264e-09	0.0375083	Southern	Subtilase family
PF01126	0.633225	0.199168	0.16631	2.73612e-07	1.67257e-11	0.78952	Southern	Heme oxygenase
PF02656	0.863905	0.0938884	0.0421863	2.9635e-09	7.27739e-16	0.00465775	Southern	Domain of unknown function (DUF202)
PF05189	0.667338	0.173288	0.152115	6.72216e-07	1.58674e-09	0.946722	Southern	RNA 3'-terminal phosphate cyclase (RTC), insert domain
PF00078	0.801937	0.0645761	0.133433	0.000126481	0.000126514	0.11543	Southern	Reverse transcriptase (RNA-dependent DNA polymerase)
PF00290	0.741655	0.125472	0.132832	2.37917e-09	1.87395e-12	0.015128	Southern	Tryptophan synthase alpha chain
PF09429	0.879482	0.102596	0.0166116	3.14866e-08	9.36441e-15	0.210907	Southern	WW domain binding protein 11
PF00504	0.553814	0.234855	0.21133	1.70025e-06	1.253e-11	0.17696	Southern	Chlorophyll A-B binding protein
PF04832	0.717268	0.143935	0.138697	4.18012e-10	3.36327e-14	0.0488092	Southern	SOUL heme-binding protein
PF13672	0.539402	0.293011	0.16491	0.000510368	2.22684e-08	0.582102	Southern	Protein phosphatase 2C
PF01138	0.534523	0.224401	0.240774	0.000105932	1.78194e-05	0.0489041	Southern	3' exoribonuclease family, domain 1
PF01137	0.667338	0.173288	0.152115	6.72216e-07	1.58674e-09	0.946722	Southern	RNA 3'-terminal phosphate cyclase
PF03713	0.527526	0.312014	0.160454	0.00010707	2.69158e-06	0.00435712	Southern	Domain of unknown function (DUF305)
PF03741	0.518222	0.203889	0.277681	0.000186521	0.000206514	0.0695721	Southern	Integral membrane protein TerC family
PF01937	0.561118	0.272658	0.165878	0.000378189	6.69616e-10	0.0624202	Southern	Damage-control phosphatase ARMT1-like domain
PF04277	0.653763	0.220794	0.12542	0.000490534	5.23104e-07	0.00155624	Southern	Oxaloacetate decarboxylase, gamma chain
PF01113	0.655685	0.216097	0.127761	0.000113588	1.19626e-08	0.0534603	Southern	Dihydrodipicolinate reductase, N-terminus
PF07767	0.681807	0.198204	0.119839	0.000512112	1.07776e-07	0.0111815	Southern	Nop53 (60S ribosomal biogenesis)
PF04801	0.0167163	0.611584	0.371695	4.33715e-10	3.13218e-17	0.0366079	Southern	RPC5 protein
PF13582	0.779484	0.141571	0.0776922	1.47201e-08	5.07433e-14	0.436672	Southern	Metallo-peptidase family M12B Reprolysin-like
PF14748	0.575467	0.266372	0.157877	2.96022e-05	7.72246e-08	0.0612232	Southern	Pyrroline-5-carboxylate reductase dimerisation
PF05180	0.631302	0.227961	0.140088	3.86585e-06	6.57468e-11	0.105036	Southern	DNL zinc finger
PF01066	0.538504	0.196025	0.26545	5.66071e-06	1.38992e-05	0.00648632	Southern	CDP-alcohol phosphatidyltransferase
PF12352	0.520005	0.217231	0.262251	2.82775e-05	2.93631e-05	0.0964014	Southern	Snare region anchored in the vesicle membrane C-terminus
PF01073	0.436679	0.46983	0.0934883	5.34935e-06	3.53077e-09	0.00922129	Southern	3-beta hydroxysteroid dehydrogenase/isomerase family
PF03638	0.784568	0.0773518	0.138066	4.5954e-09	2.16609e-09	0.00137099	Southern	Tesmin/TSO1-like CXC domain, cysteine-rich domain
PF12799	0.708915	0.148076	0.14289	5.92197e-09	6.01053e-14	0.322821	Southern	Leucine Rich repeats (2 copies)
PF05529	0.568174	0.204794	0.226775	6.20965e-06	1.79462e-07	0.0587409	Southern	Bap31/Bap29 transmembrane region
PF01079	0.302653	0.647073	0.0502726	3.17672e-05	1.00951e-07	0.00160417	Southern	Hint module
PF04511	0.586598	0.206908	0.206207	8.39241e-07	4.65826e-10	0.117527	Southern	Der1-like family
PF02012	0.831741	0.0906844	0.0774002	1.7484e-06	1.54781e-08	0.289426	Southern	BNR/Asp-box repeat
PF09802	0.562934	0.284358	0.152677	0.000919524	4.13926e-09	0.00928235	Southern	Preprotein translocase subunit Sec66
PF00091	0.0394669	0.581107	0.379425	2.76358e-07	3.8832e-17	0.00856786	Southern	Tubulin/FtsZ family, GTPase domain
PF00294	0.566432	0.276222	0.156827	0.000106927	4.95786e-11	0.347623	Southern	pfkB family carbohydrate kinase
PF13616	0.629519	0.234155	0.134319	1.15877e-05	6.03828e-10	0.750517	Southern	PPIC-type PPIASE domain
PF00439	0.522368	0.215525	0.262102	1.08192e-06	1.67596e-08	0.0076932	Southern	Bromodomain
PF04755	0.515888	0.301964	0.182105	0.000346683	1.91678e-11	0.0509566	Southern	PAP_fibrillin
PF12906	0.604648	0.292483	0.102713	4.11125e-07	6.05572e-14	0.623712	Southern	RING-variant domain
PF00218	0.637318	0.163746	0.198932	2.22918e-06	2.6172e-07	0.00115193	Southern	Indole-3-glycerol phosphate synthase
PF13225	0.544159	0.176181	0.279506	9.66771e-06	4.4694e-05	0.0129913	Southern	Beta-carotene isomerase D27-like, C-terminal
PF01564	0.138472	0.634249	0.227265	9.32676e-05	6.40734e-05	0.00984272	Southern	Spermine/spermidine synthase domain
PF11947	0.629	0.176417	0.18829	0.000459669	0.000100448	0.479279	Southern	Photosynthesis affected mutant 68
PF05729	0.076524	0.560301	0.36294	0.000789684	1.83383e-12	0.0957571	Southern	NACHT domain
PF08031	0.824148	0.135576	0.0401295	0.000919524	1.23955e-07	0.100373	Southern	Berberine and berberine like
PF07004	0.683339	0.197944	0.115935	8.79038e-06	3.56975e-11	0.813255	Southern	Sperm-tail PG-rich repeat
PF05255	0.500293	0.223491	0.273463	0.000435626	0.000265693	0.662157	Southern	Uncharacterised protein family (UPF0220)
PF05726	0.727087	0.14786	0.12505	7.521e-07	2.08274e-08	0.00118789	Southern	Pirin C-terminal cupin domain
PF04825	0.773496	0.100483	0.125949	2.48083e-06	9.52626e-07	0.0203013	Southern	N terminus of Rad21 / Rec8 like protein
PF13374	0.650563	0.234126	0.115265	5.288e-08	4.32744e-14	0.251969	Southern	Tetratricopeptide repeat
PF08755	0.693117	0.165613	0.141034	9.03856e-07	3.21786e-09	0.0925922	Southern	Hemimethylated DNA-binding protein YccV like
PF05978	0.535606	0.292107	0.170983	0.000504166	1.31394e-06	0.374162	Southern	Ion channel regulatory protein UNC-93
PF05348	0.664806	0.191065	0.142611	0.000266889	6.21825e-07	0.330298	Southern	Proteasome maturation factor UMP1
PF00752	0.106012	0.544257	0.338065	0.000598846	1.2986e-08	0.843075	Southern	XPG N-terminal domain
PF06985	0.112594	0.359158	0.528175	0.000292837	2.91411e-09	0.00566083	Southern	Heterokaryon incompatibility protein (HET)
PF10629	0.626975	0.217348	0.155619	5.03318e-05	1.47413e-07	0.0135149	Southern	Protein of unknown function (DUF2475)
PF08541	0.763629	0.136902	0.0976791	3.4891e-07	1.44079e-10	0.592882	Southern	3-Oxoacyl-[acyl-carrier-protein (ACP)] synthase III C terminal
PF11833	0.65764	0.242495	0.0998504	0.000139477	4.79224e-11	0.0077462	Southern	Protein CHAPERONE-LIKE PROTEIN OF POR1-like
PF05739	0.581945	0.199581	0.218435	9.46716e-07	2.75987e-10	0.0205816	Southern	SNARE domain
PF00867	0.106012	0.544257	0.338065	0.000598846	1.2986e-08	0.843075	Southern	XPG I-region
PF13241	0.678791	0.244679	0.0764362	3.3676e-05	7.99999e-14	0.0352069	Southern	Putative NAD(P)-binding
PF03371	0.505376	0.24484	0.249732	0.000423009	0.00058458	0.00614201	Southern	PRP38 family
PF01490	0.486825	0.281655	0.230933	0.000414661	2.46769e-06	0.365214	Southern	Transmembrane amino acid transporter protein
PF00847	0.706688	0.169362	0.123814	6.19144e-08	1.44651e-13	0.29705	Southern	AP2 domain
PF07082	0.619882	0.154055	0.22556	3.45608e-07	1.63449e-06	0.0787412	Southern	Protein of unknown function (DUF1350)
PF11789	0.426601	0.177187	0.3961	0.000321817	0.000191438	0.0484823	Southern	Zinc-finger of the MIZ type in Nse subunit
PF11016	0.578626	0.208565	0.212658	2.78015e-05	2.65815e-06	0.0779738	Southern	Protein of unknown function (DUF2854)
PF02353	0.613116	0.191621	0.194702	4.33715e-10	3.11739e-15	0.532135	Southern	Mycolic acid cyclopropane synthetase
PF03953	0.0172654	0.609008	0.373722	3.69725e-10	3.17147e-17	0.0324047	Southern	Tubulin C-terminal domain
PF02815	0.587889	0.366477	0.0456164	6.25162e-08	5.33016e-11	0.00498054	Southern	MIR domain
PF03351	0.533428	0.290811	0.175389	3.99808e-05	2.05207e-05	0.0452568	Southern	DOMON domain
PF03994	0.581083	0.234524	0.172578	1.95976e-05	2.88154e-09	0.904094	Southern	Domain of Unknown Function (DUF350)
PF13306	0.767305	0.159935	0.0721352	6.04787e-06	3.55497e-11	0.465358	Southern	BspA type Leucine rich repeat region (6 copies)
PF05990	0.65422	0.241536	0.104198	0.000476195	4.39222e-09	0.0396469	Southern	Alpha/beta hydrolase of unknown function (DUF900)
PF06079	0.761138	0.143273	0.0941187	0.000718343	2.02801e-06	0.151478	Southern	Apyrase
PF08760	0.0119412	0.566811	0.417542	5.77407e-07	4.03946e-13	0.124156	Southern	Domain of unknown function (DUF1793)
PF12046	0.563527	0.264588	0.171316	0.000826419	4.36627e-07	0.107608	Southern	Cofactor assembly of complex C subunit B
PF00929	0.653094	0.159903	0.186703	2.52947e-06	1.26746e-07	0.0534603	Southern	Exonuclease
PF03194	0.545054	0.186986	0.267888	0.000109262	0.000832386	0.00403443	Southern	LUC7 N_terminus
PF00734	0.796391	0.0932882	0.109103	5.77274e-08	1.03726e-09	0.250212	Southern	Fungal cellulose binding domain
PF13432	0.602659	0.265089	0.132244	1.86837e-07	3.5363e-17	0.0676892	Southern	Tetratricopeptide repeat
PF05221	0.639463	0.234849	0.125674	4.08527e-06	9.61483e-13	0.0532129	Southern	S-adenosyl-L-homocysteine hydrolase
PF05548	0.858659	0.0775879	0.0618099	3.36272e-09	1.00562e-12	0.528892	Southern	Gametolysin peptidase M11
PF02270	0.627403	0.170633	0.200488	0.000174089	2.67323e-05	0.116134	Southern	TFIIF, beta subunit HTH domain
PF08550	0.904343	0.0450228	0.0505051	1.41266e-11	1.91154e-15	0.0310867	Southern	Fungal protein of unknown function (DUF1752)
PF00329	0.00287362	0.624405	0.372711	2.67988e-11	9.33509e-16	0.00100985	Southern	Respiratory-chain NADH dehydrogenase, 30 Kd subunit
PF00235	0.618796	0.186941	0.194241	6.9316e-07	1.59351e-09	0.0179634	Southern	Profilin
PF01776	0.0156007	0.790612	0.193786	4.33715e-10	1.66624e-16	0.00347476	Southern	Ribosomal L22e protein family
PF00860	0.0544138	0.64571	0.28926	8.16713e-05	6.24143e-11	0.858297	Southern	Permease family
PF14670	0.0937805	0.653053	0.253089	4.18419e-05	1.45182e-08	0.00538996	Southern	Coagulation Factor Xa inhibitory site
PF08507	0.567883	0.252621	0.178259	1.17539e-05	6.43071e-11	0.552607	Southern	COPI associated protein
PF13504	0.492033	0.24113	0.266805	5.34395e-05	8.41286e-07	0.0156323	Southern	LRR_7
PF01019	0.0944468	0.557236	0.34558	3.32565e-06	5.53856e-05	0.131283	Southern	Gamma-glutamyltranspeptidase
PF09353	0.56788	0.212356	0.219592	2.24421e-06	9.09922e-09	0.096932	Southern	Domain of unknown function (DUF1995)
PF08238	0.507341	0.309983	0.181767	9.79864e-06	1.31785e-14	0.722757	Southern	Sel1 repeat
PF01015	0.124721	0.555173	0.319934	0.000328487	4.13213e-08	0.245139	Southern	Ribosomal S3Ae family
PF01717	0.678791	0.244679	0.0764362	3.3676e-05	7.99999e-14	0.0352069	Southern	Cobalamin-independent synthase, Catalytic domain
PF13431	0.653844	0.242652	0.103429	3.85847e-07	5.6848e-17	0.251534	Southern	Tetratricopeptide repeat
PF04824	0.773496	0.100483	0.125949	2.48083e-06	9.52626e-07	0.0203013	Southern	Conserved region of Rad21 / Rec8 like protein
PF05970	0.455955	0.323331	0.218281	7.94762e-05	7.91968e-06	0.247327	Southern	PIF1-like helicase
PF04727	0.742411	0.0575182	0.199465	1.56356e-07	2.10259e-07	0.0757201	Southern	ELMO/CED-12 family
PF13414	0.439319	0.261582	0.299093	4.08527e-06	3.72877e-08	0.0656384	Southern	TPR repeat
PF01687	0.498259	0.227529	0.27001	0.000175206	0.0001632	0.388746	Southern	Riboflavin kinase
PF02535	0.631565	0.203278	0.164231	9.32355e-07	6.28519e-13	0.910224	Southern	ZIP Zinc transporter
PF13167	0.72109	0.133065	0.140303	5.19498e-08	2.66435e-10	0.579693	Southern	GTP-binding GTPase N-terminal
PF13424	0.621063	0.241905	0.136899	9.20572e-07	4.79449e-12	0.847951	Southern	Tetratricopeptide repeat
PF01652	0.734115	0.162838	0.103044	2.86195e-06	1.28109e-11	0.00303648	Southern	Eukaryotic initiation factor 4E
PF08149	0.663506	0.14844	0.17748	4.53366e-07	3.43728e-08	0.819699	Southern	BING4CT (NUC141) domain
PF08545	0.763629	0.136902	0.0976791	3.4891e-07	1.44079e-10	0.592882	Southern	3-Oxoacyl-[acyl-carrier-protein (ACP)] synthase III
PF09320	0.758002	0.110978	0.130981	1.57234e-11	5.91735e-15	0.0317443	Southern	Domain of unknown function (DUF1977)
PF05615	0.361791	0.351822	0.278329	0.610453	0.00420945	0.0104386	N/S	Tho complex subunit 7
PF05419	0.480798	0.290716	0.226443	0.0359075	0.0039027	0.897335	N/S	GUN4-like
PF02698	0.285363	0.362274	0.320461	0.759251	0.292879	0.341581	N/S	DUF218 domain
PF08564	0.452197	0.273602	0.27283	0.0367106	0.00597253	0.157429	N/S	Cdc37 C terminal domain
PF08565	0.452197	0.273602	0.27283	0.0367106	0.00597253	0.157429	N/S	Cdc37 Hsp90 binding domain
PF08645	0.369466	0.269453	0.299264	0.771307	0.928053	0.6988	N/S	Polynucleotide kinase 3 phosphatase
PF08547	0.370658	0.328406	0.30041	0.221156	0.118321	0.612807	N/S	Complex I intermediate-associated protein 30 (CIA30)
PF08496	0.509773	0.26643	0.221487	0.00895066	0.00107158	0.462827	N/S	Peptidase family S49 N-terminal
PF02826	0.387998	0.35284	0.256851	0.185294	0.00224985	0.664859	N/S	D-isomer specific 2-hydroxyacid dehydrogenase, NAD binding domain
PF08597	0.463958	0.272722	0.252724	0.295011	0.0658268	0.151478	N/S	Translation initiation factor eIF3 subunit
PF02837	0.337125	0.480332	0.17627	0.804896	0.063739	0.0120452	N/S	Glycosyl hydrolases family 2, sugar binding domain
PF02772	0.479715	0.263467	0.256776	0.00738006	0.00958079	0.0370918	N/S	S-adenosylmethionine synthetase, central domain
PF02777	0.297201	0.474173	0.226341	0.535768	0.24075	0.0587409	N/S	Iron/manganese superoxide dismutases, C-terminal domain
PF08534	0.271731	0.485263	0.242236	0.108006	0.578949	0.00174104	N/S	Redoxin
PF08642	0.476753	0.236892	0.283535	0.0606941	0.121273	0.102841	N/S	Histone deacetylation protein Rxt3
PF02836	0.297094	0.416409	0.280529	0.425647	0.838538	0.154707	N/S	Glycosyl hydrolases family 2, TIM barrel domain
PF02773	0.479715	0.263467	0.256776	0.00738006	0.00958079	0.0370918	N/S	S-adenosylmethionine synthetase, C-terminal domain
PF04427	0.434888	0.299179	0.263992	0.0358071	0.0171282	0.563917	N/S	Brix domain
PF05191	0.392063	0.306462	0.300412	0.191862	0.176532	0.434259	N/S	Adenylate kinase, active site lid
PF03952	0.422287	0.287951	0.289653	0.0288876	0.0134247	0.131283	N/S	Enolase, N-terminal domain
PF07465	0.255557	0.630693	0.108958	0.467131	0.668068	0.00239761	N/S	Photosystem I protein M (PsaM)
PF15305	0.384592	0.369777	0.235499	0.388152	0.031485	0.387438	N/S	Intraflagellar transport protein 43
PF03871	0.301962	0.444187	0.248992	0.236054	0.619639	0.00256234	N/S	RNA polymerase Rpb5, N-terminal domain
PF07648	0.408652	0.422265	0.167831	0.592823	0.363884	0.00272466	N/S	Kazal-type serine protease inhibitor domain
PF07669	0.254232	0.195015	0.529499	0.166136	0.712862	0.0350449	N/S	Eco57I restriction-modification methylase
PF03820	0.406234	0.277512	0.31205	0.119856	0.49872	0.0378976	N/S	Sideroflexins
PF07676	0.192953	0.710676	0.0960339	0.028167	0.0685965	0.012334	N/S	WD40-like Beta Propeller Repeat
PF05914	0.488097	0.277355	0.227133	0.0252208	0.00436348	0.378599	N/S	RIB43A
PF07681	0.118518	0.684096	0.196532	0.846806	0.100773	0.0460567	N/S	DoxX
PF04699	0.491023	0.315612	0.189154	0.160004	0.00121303	0.326796	N/S	ARP2/3 complex 16 kDa subunit (p16-Arc)
PF03781	0.254858	0.406246	0.336289	0.169332	0.00371549	0.600906	N/S	Sulfatase-modifying factor enzyme 1
PF07687	0.416637	0.342095	0.235064	0.0693549	0.00515068	0.537514	N/S	Peptidase dimerisation domain
PF07712	0.227356	0.393655	0.323693	0.971713	0.727157	0.595424	N/S	Stress up-regulated Nod 19
PF05856	0.368759	0.338396	0.281518	0.506767	0.205465	0.934305	N/S	ARP2/3 complex 20 kDa subunit (ARPC4)
PF07721	0.218658	0.136004	0.637834	0.163835	0.914502	0.0450035	N/S	Tetratricopeptide repeat
PF05853	0.244076	0.314174	0.420838	0.728391	0.0528899	0.0440948	N/S	beta-keto acid cleavage enzyme
PF03645	0.316033	0.327588	0.354059	0.368941	0.443366	0.0017234	N/S	Tctex-1 family
PF04889	0.395443	0.329711	0.268113	0.529692	0.043616	0.0249027	N/S	Cwf15/Cwc15 cell cycle control protein
PF04893	0.349825	0.329613	0.31073	0.76547	0.439417	0.944937	N/S	Yip1 domain
PF04909	0.362739	0.305395	0.329969	0.138019	0.349952	0.0841489	N/S	Amidohydrolase
PF03587	0.249889	0.316573	0.42607	0.342902	0.00289435	0.0118298	N/S	EMG1/NEP1 methyltransferase
PF05879	0.463728	0.250685	0.285454	0.0108237	0.0743624	0.013426	N/S	Root hair defective 3 GTP-binding protein (RHD3) GTPase domain
PF03969	0.37289	0.377764	0.226585	1	0.0174126	0.0100869	N/S	AFG1-like ATPase
PF05991	0.177023	0.264752	0.548312	0.112533	0.0444249	0.307861	N/S	YacP-like NYN domain
PF07109	0.351442	0.283866	0.359742	0.826661	0.605955	0.100484	N/S	Magnesium-protoporphyrin IX methyltransferase C-terminus
PF06415	0.462793	0.2637	0.27254	0.0297381	0.0475364	0.0621026	N/S	BPG-independent PGAM N-terminus (iPGM_N)
PF04410	0.266596	0.472384	0.257839	0.5496	0.590469	0.329534	N/S	Gar1/Naf1 RNA binding region
PF06294	0.381886	0.414056	0.2	0.258485	0.00929593	0.390826	N/S	CH-like domain in sperm protein
PF06470	0.393886	0.331924	0.263783	0.750323	0.788964	0.828961	N/S	SMC proteins Flexible Hinge Domain
PF04321	0.295673	0.380215	0.314382	0.844998	0.947501	0.975011	N/S	RmlD substrate binding domain
PF06476	0.324083	0.251552	0.418933	0.307025	0.458642	0.00417359	N/S	Protein of unknown function (DUF1090)
PF06514	0.325792	0.420348	0.253079	0.973486	0.2186	0.276502	N/S	Photosystem II 12 kDa extrinsic protein (PsbU)
PF06703	0.283929	0.464432	0.241366	0.400484	0.513994	0.125067	N/S	Microsomal signal peptidase 25 kDa subunit (SPC25)
PF04536	0.351354	0.454562	0.188051	0.800605	0.00233834	0.0201029	N/S	TPM domain
PF04172	0.432005	0.234673	0.323166	0.0497612	0.108263	0.275318	N/S	LrgB-like family
PF06732	0.614517	0.192176	0.190628	0.0278032	0.105813	0.00222729	N/S	Pescadillo N-terminus
PF06800	0.275123	0.390691	0.308627	0.973486	0.532553	0.469671	N/S	Sugar transport protein
PF06155	0.45325	0.259782	0.284825	0.0242208	0.100977	0.0156938	N/S	Gamma-butyrobetaine hydroxylase-like, N-terminal
PF04101	0.330408	0.340954	0.303873	0.908779	0.933919	0.630812	N/S	Glycosyltransferase family 28 C-terminal domain
PF06925	0.330408	0.340954	0.303873	0.908779	0.933919	0.630812	N/S	Monogalactosyldiacylglycerol (MGDG) synthase
PF04062	0.352901	0.39746	0.239237	0.728817	0.0395348	0.084516	N/S	ARP2/3 complex ARPC3 (21 kDa) subunit
PF06968	0.138613	0.592129	0.26719	0.0756459	0.0183144	0.21485	N/S	Biotin and Thiamin Synthesis associated domain
PF04051	0.251899	0.442857	0.30037	0.0272172	0.533384	0.00242525	N/S	Transport protein particle (TRAPP) component
PF06991	0.448784	0.248083	0.290472	0.285155	0.0234267	0.129637	N/S	Microfibril-associated/Pre-mRNA processing
PF04042	0.237686	0.346144	0.386191	0.485878	0.22283	0.590405	N/S	DNA polymerase alpha/epsilon subunit B
PF04003	0.44584	0.206949	0.345592	0.00597008	0.145075	0.0111528	N/S	Dip2/Utp12 Family
PF04000	0.228157	0.325458	0.432443	0.934038	0.00359938	0.00135291	N/S	Sas10/Utp3/C1D family
PF03992	0.491669	0.263717	0.240602	0.0199898	0.00322613	0.621377	N/S	Antibiotic biosynthesis monooxygenase
PF07856	0.350725	0.331594	0.310628	0.495412	0.239967	0.532866	N/S	Mediator of CRAC channel activity
PF03567	0.355211	0.328464	0.31579	0.491884	0.906479	0.317938	N/S	Sulfotransferase family
PF07857	0.275123	0.390691	0.308627	0.973486	0.532553	0.469671	N/S	Transmembrane family, TMEM144 of transporters
PF03540	0.442953	0.377365	0.164552	0.643646	0.00316886	0.00218923	N/S	Transcription initiation factor TFIID 23-30kDa subunit
PF03226	0.51732	0.314935	0.154466	0.199487	0.0431488	0.283572	N/S	Yippee zinc-binding/DNA-binding /Mis18, centromere assembly
PF03222	0.237307	0.334602	0.419011	0.512489	0.0330096	0.0667135	N/S	Tryptophan/tyrosine permease family
PF08126	0.0763295	0.743879	0.178254	0.00523608	0.00388704	0.267549	N/S	Propeptide_C25
PF03198	0.238277	0.322747	0.428961	0.930039	0.0366782	0.0126053	N/S	Glucanosyltransferase
PF05712	0.21297	0.409048	0.375462	0.0245291	0.0169217	0.236974	N/S	MRG
PF08153	0.449259	0.331897	0.196089	0.319887	0.0335156	0.330351	N/S	NGP1NT (NUC091) domain
PF03151	0.356396	0.299173	0.344382	0.338254	0.0538927	0.0107271	N/S	Triose-phosphate Transporter family
PF08207	0.342648	0.358452	0.294033	0.716999	0.800763	0.93137	N/S	Elongation factor P (EF-P) KOW-like domain
PF05704	0.422659	0.262953	0.267305	0.62149	0.86862	0.522427	N/S	Capsular polysaccharide synthesis protein
PF05698	0.418976	0.270627	0.309325	0.0501443	0.0762002	0.114334	N/S	Bacterial trigger factor protein (TF) C-terminus
PF03129	0.295447	0.377642	0.326161	0.724586	0.467759	0.45465	N/S	Anticodon binding domain
PF05697	0.343007	0.279546	0.372451	0.110618	0.710013	0.00858623	N/S	Bacterial trigger factor protein (TF)
PF08231	0.479085	0.324361	0.186143	0.724018	0.0178306	0.00277817	N/S	SYF2 splicing factor
PF03102	0.377976	0.349795	0.268641	0.260645	0.159968	0.649071	N/S	NeuB family
PF08276	0.33769	0.430794	0.231449	0.029781	0.038057	0.006995	N/S	PAN-like domain
PF08321	0.273095	0.399425	0.327203	0.143442	0.0787056	0.345772	N/S	PPP5 TPR repeat region
PF02996	0.238825	0.37289	0.379184	0.0987152	0.0146829	0.675413	N/S	Prefoldin subunit
PF05670	0.479597	0.287395	0.217754	0.219773	0.0444021	0.295593	N/S	NFACT protein RNA binding domain
PF02978	0.42387	0.291723	0.282971	0.193935	0.0856573	0.838317	N/S	Signal peptide binding domain
PF02932	0.566342	0.207348	0.225633	0.01432	0.0445868	0.170868	N/S	Neurotransmitter-gated ion-channel transmembrane region
PF02931	0.566342	0.207348	0.225633	0.01432	0.0445868	0.170868	N/S	Neurotransmitter-gated ion-channel ligand binding domain
PF02911	0.553613	0.202679	0.242682	0.00510347	0.0075114	0.0456945	N/S	Formyl transferase, C-terminal domain
PF08449	0.39311	0.291899	0.314835	0.236658	0.515327	0.14055	N/S	UAA transporter family
PF03234	0.452197	0.273602	0.27283	0.0367106	0.00597253	0.157429	N/S	Cdc37 N terminal kinase binding
PF02887	0.525418	0.241867	0.231791	0.58431	0.991665	0.411318	N/S	Pyruvate kinase, alpha/beta domain
PF08071	0.317998	0.381905	0.299836	0.932324	0.390986	0.113598	N/S	RS4NT (NUC023) domain
PF03332	0.233074	0.451197	0.31116	0.258485	0.0667041	0.76281	N/S	Eukaryotic phosphomannomutase
PF07876	0.336634	0.361586	0.279496	0.653025	0.258872	0.785007	N/S	Stress responsive A/B Barrel Domain
PF03517	0.429433	0.337056	0.222645	0.331494	0.00175093	0.00159799	N/S	Regulator of volume decrease after cellular swelling
PF03501	0.213514	0.421131	0.363795	0.432453	0.0475364	0.381	N/S	Plectin/S10 domain
PF07884	0.31044	0.397458	0.273451	0.605714	0.820883	0.149373	N/S	Vitamin K epoxide reductase family
PF07885	0.387116	0.326352	0.285729	0.612637	0.838538	0.159741	N/S	Ion channel
PF07912	0.363545	0.43737	0.197809	0.844998	0.00184272	0.0213712	N/S	ERp29, N-terminal domain
PF03471	0.391925	0.25882	0.339904	0.143653	0.472111	0.0928934	N/S	Transporter associated domain
PF07928	0.230998	0.346641	0.413188	0.597301	0.0104387	0.0315557	N/S	Vps54-like protein
PF07934	0.2322	0.543038	0.201587	0.222227	0.769427	0.00640737	N/S	8-oxoguanine DNA glycosylase, N-terminal domain
PF07944	0.610689	0.196223	0.191471	0.255201	0.452345	0.119383	N/S	Beta-L-arabinofuranosidase, GH127 catalytic domain
PF03462	0.318456	0.364388	0.286317	0.949817	0.615832	0.981232	N/S	PCRF domain
PF04982	0.332155	0.411513	0.248918	0.949817	0.154003	0.13493	N/S	HPP family
PF07991	0.336174	0.356428	0.304196	0.454487	0.941868	0.0809906	N/S	Acetohydroxy acid isomeroreductase, NADPH-binding domain
PF03405	0.406503	0.323851	0.267909	0.449621	0.102307	0.768187	N/S	Fatty acid desaturase
PF05773	0.479597	0.287395	0.217754	0.219773	0.0444021	0.295593	N/S	RWD domain
PF03403	0.573636	0.329203	0.0971469	0.002601	0.00108505	0.00775082	N/S	Platelet-activating factor acetylhydrolase, isoform II
PF03388	0.328984	0.313127	0.352845	0.800605	0.462638	0.0727393	N/S	Legume-like lectin family
PF03382	0.32455	0.494895	0.180426	0.548139	0.632714	0.560145	N/S	Mycoplasma protein of unknown function, DUF285
PF03367	0.260392	0.25407	0.471188	0.86342	0.0861534	0.00386867	N/S	ZPR1 zinc-finger domain
PF03366	0.398925	0.359917	0.23265	0.41813	0.0155903	0.111541	N/S	YEATS family
PF05757	0.365411	0.410427	0.223569	0.708338	0.0231944	0.182274	N/S	Oxygen evolving enhancer protein 3 (PsbQ)
PF05022	0.480629	0.259436	0.252332	0.130706	0.0342579	0.565356	N/S	SRP40, C-terminal domain
PF03343	0.342484	0.293128	0.339072	0.438272	0.74148	0.054753	N/S	SART-1 family
PF03256	0.508263	0.210035	0.270662	0.789146	0.114692	0.0367085	N/S	Anaphase-promoting complex, subunit 10 (APC10)
PF03465	0.415881	0.271303	0.312195	0.0448252	0.388035	0.00207948	N/S	eRF1 domain 3
PF00001	0.216997	0.488191	0.265011	0.0275526	0.908502	0.00237415	N/S	7 transmembrane receptor (rhodopsin family)
PF08694	0.423059	0.336158	0.228322	0.69978	0.210175	0.178907	N/S	Ubiquitin-fold modifier-conjugating enzyme 1
PF00889	0.320769	0.504484	0.173637	0.653339	0.00423005	0.00247163	N/S	Elongation factor TS
PF00891	0.408215	0.280567	0.309165	0.114342	0.617655	0.0100591	N/S	O-methyltransferase domain
PF00892	0.302654	0.323395	0.373824	0.76547	0.00191055	0.0102696	N/S	EamA-like transporter family
PF00900	0.317998	0.381905	0.299836	0.932324	0.390986	0.113598	N/S	Ribosomal family S4e
PF00920	0.274859	0.463447	0.256839	0.582729	0.685608	0.530789	N/S	Dehydratase family
PF00939	0.257184	0.251946	0.474625	0.490664	0.304869	0.0108978	N/S	Sodium:sulfate symporter transmembrane region
PF00887	0.413692	0.350236	0.233136	0.58431	0.00421741	0.00828994	N/S	Acyl CoA binding protein
PF00957	0.374588	0.295824	0.329183	0.0808025	0.122939	0.0560266	N/S	Synaptobrevin
PF13015	0.342942	0.284859	0.362102	0.308661	0.788964	0.00443595	N/S	Glucosidase II beta subunit-like protein
PF12847	0.657522	0.182363	0.159795	0.095849	0.0073708	0.44628	N/S	Methyltransferase domain
PF01081	0.307171	0.414169	0.267446	0.930039	0.666051	0.664859	N/S	KDPG and KHG aldolase
PF01096	0.359787	0.391337	0.243522	0.980049	0.010841	0.0567568	N/S	Transcription factor S-II (TFIIS)
PF01115	0.466818	0.246643	0.285525	0.0110431	0.0159037	0.174623	N/S	F-actin capping protein, beta subunit
PF01128	0.46412	0.26662	0.26313	0.165151	0.171372	0.359941	N/S	2-C-methyl-D-erythritol 4-phosphate cytidylyltransferase
PF00970	0.300895	0.43185	0.26695	0.738251	0.298576	0.131053	N/S	Oxidoreductase FAD-binding domain
PF01132	0.342648	0.358452	0.294033	0.716999	0.800763	0.93137	N/S	Elongation factor P (EF-P) OB domain
PF00884	0.27655	0.435053	0.287975	0.185294	0.647109	0.0507007	N/S	Sulfatase
PF00881	0.483656	0.235856	0.280439	0.00101168	0.00446934	0.0102467	N/S	Nitroreductase family
PF13459	0.342543	0.406148	0.247368	0.837099	0.0164446	0.0570456	N/S	4Fe-4S single cluster domain
PF00691	0.395546	0.380963	0.214425	0.584288	0.0306422	0.184931	N/S	OmpA family
PF13442	0.429299	0.369732	0.199571	0.450293	0.640024	0.0935916	N/S	Cytochrome C oxidase, cbb3-type, subunit III
PF00703	0.292722	0.355231	0.348556	0.404637	0.0105995	0.0896866	N/S	Glycosyl hydrolases family 2
PF00719	0.330066	0.34194	0.327288	0.735754	0.389807	0.16605	N/S	Inorganic pyrophosphatase
PF00730	0.252818	0.420265	0.320186	0.206131	0.0640698	0.561437	N/S	HhH-GPD superfamily base excision DNA repair protein
PF00883	0.430278	0.246942	0.321521	0.0187514	0.147033	0.00705365	N/S	Cytosol aminopeptidase family, catalytic domain
PF00754	0.396259	0.382026	0.22158	0.137274	0.931895	0.0469105	N/S	F5/8 type C domain
PF00810	0.276171	0.479453	0.242148	0.590723	0.494106	0.329534	N/S	ER lumen protein retaining receptor
PF13301	0.331198	0.221705	0.436213	0.50808	0.490892	0.0143359	N/S	Protein of unknown function (DUF4079)
PF00827	0.409848	0.335689	0.253709	0.0796444	0.00552856	0.622294	N/S	Ribosomal L15
PF00833	0.306671	0.367974	0.324601	0.796611	0.149938	0.628485	N/S	Ribosomal S17
PF00834	0.259553	0.416289	0.323077	0.890028	0.0115771	0.102814	N/S	Ribulose-phosphate 3 epimerase family
PF13291	0.41447	0.278524	0.305213	0.0324199	0.197608	0.0043114	N/S	ACT domain
PF13385	0.369269	0.301816	0.328891	0.0370887	0.268571	0.00257262	N/S	Concanavalin A-like lectin/glucanases superfamily
PF13465	0.26518	0.347463	0.369591	0.661215	0.338827	0.0852916	N/S	Zinc-finger double domain
PF12763	0.244272	0.385008	0.368257	0.352706	0.00178427	0.0626986	N/S	Cytoskeletal-regulatory complex EF hand
PF01151	0.203508	0.591278	0.204023	0.0597213	0.268992	0.0095099	N/S	GNS1/SUR4 family
PF01430	0.436672	0.26714	0.294493	0.0280308	0.061619	0.0489041	N/S	Hsp33 protein
PF01436	0.538014	0.231384	0.230185	0.0110799	0.00249073	0.438371	N/S	NHL repeat
PF01450	0.336174	0.356428	0.304196	0.454487	0.941868	0.0809906	N/S	Acetohydroxy acid isomeroreductase, catalytic domain
PF11717	0.350871	0.28085	0.367118	0.430834	0.0715194	0.0012819	N/S	RNA binding activity-knot of a chromodomain
PF01479	0.319467	0.385002	0.295195	0.885463	0.623035	0.486461	N/S	S4 domain
PF11539	0.488404	0.208239	0.287195	0.295157	0.870334	0.00595488	N/S	Protein of unknown function (DUF3228)
PF11934	0.457746	0.271438	0.262185	0.0633471	0.0146829	0.746629	N/S	Domain of unknown function (DUF3452)
PF11527	0.402472	0.309137	0.287159	0.0365588	0.0482613	0.0341829	N/S	The ARF-like 2 binding protein BART
PF11317	0.297556	0.475329	0.218611	0.37692	0.624249	0.0419054	N/S	Protein of unknown function (DUF3119)
PF11255	0.45325	0.259782	0.284825	0.0242208	0.100977	0.0156938	N/S	Protein of unknown function (DUF3054)
PF01509	0.396486	0.327189	0.274276	0.15603	0.00149103	0.34787	N/S	TruB family pseudouridylate synthase (N terminal domain)
PF01546	0.368111	0.293128	0.336992	0.0485821	0.251722	0.0117216	N/S	Peptidase family M20/M25/M40
PF10998	0.353765	0.348782	0.272048	0.347759	0.396379	0.44558	N/S	Protein of unknown function (DUF2838)
PF01566	0.249314	0.434259	0.299802	0.712022	0.139632	0.126386	N/S	Natural resistance-associated macrophage protein-like
PF11523	0.484806	0.279795	0.224225	0.188055	0.0324763	0.726745	N/S	Protein of unknown function (DUF3223)
PF01135	0.365018	0.403329	0.220402	0.0541596	0.0532584	0.597359	N/S	Protein-L-isoaspartate(D-aspartate) O-methyltransferase (PCMT)
PF01364	0.0763295	0.743879	0.178254	0.00523608	0.00388704	0.267549	N/S	Peptidase family C25
PF12159	0.35373	0.395573	0.249881	0.685078	0.128538	0.54917	N/S	Protein of unknown function (DUF3593)
PF01156	0.320572	0.434929	0.241645	0.86342	0.176874	0.033422	N/S	Inosine-uridine preferring nucleoside hydrolase
PF01161	0.426687	0.302783	0.266002	0.157826	0.0100976	0.630401	N/S	Phosphatidylethanolamine-binding protein
PF12701	0.425932	0.271404	0.283806	0.231132	0.240423	0.877373	N/S	Scd6-like Sm domain
PF12589	0.398673	0.344774	0.245494	0.491199	0.00140373	0.00391056	N/S	Methyltransferase involved in Williams-Beuren syndrome
PF01191	0.301962	0.444187	0.248992	0.236054	0.619639	0.00256234	N/S	RNA polymerase Rpb5, C-terminal domain
PF12521	0.373543	0.408127	0.217216	0.285961	0.0300718	0.785007	N/S	Protein of unknown function (DUF3724)
PF01346	0.340454	0.412953	0.246341	0.490664	0.00521184	0.0124055	N/S	Domain amino terminal to FKBP-type peptidyl-prolyl isomerase
PF01207	0.385261	0.326325	0.280704	0.502056	0.131516	0.251673	N/S	Dihydrouridine synthase (Dus)
PF01227	0.278115	0.306161	0.393748	0.699321	0.209335	0.0263824	N/S	GTP cyclohydrolase I
PF01230	0.323184	0.375235	0.296211	0.990268	0.261872	0.340876	N/S	HIT domain
PF12341	0.261113	0.333343	0.395639	0.705906	0.0704115	0.0025428	N/S	Minichromosome loss protein, Mcl1, middle region
PF01263	0.282103	0.452941	0.259265	0.198834	0.618283	0.00116485	N/S	Aldose 1-epimerase
PF01269	0.266596	0.472384	0.257839	0.5496	0.590469	0.329534	N/S	Fibrillarin
PF12254	0.27851	0.323862	0.390126	0.428618	0.425239	0.00630687	N/S	DNA polymerase alpha subunit p180 N terminal
PF01220	0.366489	0.394335	0.226064	0.524867	0.0109386	0.010424	N/S	Dehydroquinase class II
PF10693	0.273011	0.309274	0.406391	0.695951	0.025635	0.00289289	N/S	Protein of unknown function (DUF2499)
PF13500	0.489754	0.231728	0.278084	0.00126142	0.00208992	0.0497486	N/S	AAA domain
PF13528	0.422285	0.25444	0.320683	0.0229215	0.261872	0.00606687	N/S	Glycosyl transferase family 1
PF00179	0.313998	0.39407	0.291762	0.500114	0.189466	0.110881	N/S	Ubiquitin-conjugating enzyme
PF00182	0.248367	0.440664	0.309428	0.555691	0.133604	0.959324	N/S	Chitinase class I
PF00198	0.34657	0.344261	0.307034	0.651246	0.203462	0.847073	N/S	2-oxoacid dehydrogenases acyltransferase (catalytic domain)
PF00211	0.206921	0.386462	0.391727	0.553169	0.0651081	0.012575	N/S	Adenylate and Guanylate cyclase catalytic domain
PF00224	0.512093	0.246356	0.241121	0.338254	0.31832	0.401361	N/S	Pyruvate kinase, barrel domain
PF00230	0.227143	0.442268	0.328906	0.748218	0.00117267	0.023383	N/S	Major intrinsic protein
PF00175	0.307657	0.408496	0.28339	0.995956	0.447124	0.469671	N/S	Oxidoreductase NAD-binding domain
PF00232	0.481038	0.263156	0.25251	0.0136584	0.0175436	0.108598	N/S	Glycosyl hydrolase family 1
PF00241	0.135751	0.69796	0.164469	0.324892	0.313826	0.586248	N/S	Cofilin/tropomyosin-type actin-binding protein
PF00246	0.419793	0.319909	0.259283	0.561995	0.304665	0.175336	N/S	Zinc carboxypeptidase
PF14306	0.29337	0.364991	0.341224	0.902852	0.031485	0.0680794	N/S	PUA-like domain
PF00255	0.397271	0.379965	0.222008	0.122952	0.00145234	0.987641	N/S	Glutathione peroxidase
PF00262	0.311238	0.327968	0.360588	0.47244	0.169236	0.00212771	N/S	Calreticulin family
PF00264	0.414658	0.272621	0.304574	0.107426	0.179879	0.243884	N/S	Common central domain of tyrosinase
PF00233	0.294065	0.329904	0.367942	0.522334	0.169187	0.0125978	N/S	3'5'-cyclic nucleotide phosphodiesterase
PF00282	0.406394	0.34925	0.232231	0.941444	0.928756	0.534754	N/S	Pyridoxal-dependent decarboxylase conserved domain
PF14561	0.386699	0.315031	0.278319	0.138854	0.0856573	0.807387	N/S	Tetratricopeptide repeat
PF14602	0.397713	0.308557	0.285325	0.21901	0.0912452	0.540772	N/S	Hexapeptide repeat of succinyl-transferase
PF14974	0.315767	0.41549	0.268226	0.45132	0.272549	0.0412428	N/S	Protein C10
PF00038	0.4868	0.251612	0.236467	0.659698	0.359094	0.541433	N/S	Intermediate filament protein
PF14870	0.423946	0.250781	0.325209	0.00379084	0.040287	0.00905996	N/S	Photosynthesis system II assembly factor YCF48
PF14833	0.509769	0.236019	0.243836	0.0332192	0.0141654	0.72807	N/S	NAD-binding of NADP-dependent 3-hydroxyisobutyrate dehydrogenase
PF00059	0.285563	0.433256	0.281087	0.982945	0.0956585	0.128361	N/S	Lectin C-type domain
PF00071	0.352941	0.352549	0.294277	0.427252	0.0910595	0.826589	N/S	Ras family
PF14580	0.390832	0.298525	0.310148	0.0448252	0.0036861	0.300606	N/S	Leucine-rich repeat
PF14771	0.508563	0.233745	0.250189	0.0714944	0.153922	0.0583488	N/S	Domain of unknown function (DUF4476)
PF00090	0.181675	0.618268	0.197701	0.218902	0.510845	0.0908639	N/S	Thrombospondin type 1 domain
PF00098	0.47997	0.23107	0.288932	0.00923644	0.130589	0.00442263	N/S	Zinc knuckle
PF00113	0.422287	0.287951	0.289653	0.0288876	0.0134247	0.131283	N/S	Enolase, C-terminal TIM barrel domain
PF00125	0.36177	0.36433	0.273703	0.223468	0.0127948	0.835339	N/S	Core histone H2A/H2B/H3/H4
PF14681	0.355574	0.262612	0.364461	0.470252	0.565683	0.00188232	N/S	Uracil phosphoribosyltransferase
PF00144	0.227194	0.515255	0.256927	0.0513353	0.0419434	0.0442323	N/S	Beta-lactamase
PF00081	0.297201	0.474173	0.226341	0.535768	0.24075	0.0587409	N/S	Iron/manganese superoxide dismutases, alpha-hairpin domain
PF00662	0.114062	0.688079	0.196104	0.526498	0.071758	0.0268081	N/S	NADH-Ubiquinone oxidoreductase (complex I), chain 5 N-terminus
PF14215	0.287958	0.366872	0.340484	0.995956	0.371523	0.323431	N/S	bHLH-MYC and R2R3-MYB transcription factors N-terminal
PF00300	0.37971	0.291813	0.328425	0.0486207	0.0496556	0.0742516	N/S	Histidine phosphatase superfamily (branch 1)
PF00486	0.791768	0.163819	0.0416486	0.00523608	0.00298609	0.24803	N/S	Transcriptional regulatory protein, C terminal
PF13714	0.375943	0.274217	0.327142	0.217441	0.625692	0.0806327	N/S	Phosphoenolpyruvate phosphomutase
PF13661	0.404023	0.292936	0.302213	0.0118547	0.0873839	0.00683601	N/S	2OG-Fe(II) oxygenase superfamily
PF00533	0.614517	0.192176	0.190628	0.0278032	0.105813	0.00222729	N/S	BRCA1 C Terminus (BRCT) domain
PF00549	0.304918	0.356737	0.333606	0.30709	0.978129	0.011142	N/S	CoA-ligase
PF00551	0.553613	0.202679	0.242682	0.00510347	0.0075114	0.0456945	N/S	Formyl transferase
PF00485	0.252795	0.476353	0.268754	0.659746	0.818969	0.489229	N/S	Phosphoribulokinase / Uridine kinase family
PF13603	0.445057	0.259924	0.293957	0.0320522	0.0455591	0.150492	N/S	Leucyl-tRNA synthetase, editing domain
PF00570	0.228201	0.450987	0.315322	0.0310115	0.203285	0.049571	N/S	HRDC domain
PF13576	0.435135	0.336516	0.226637	0.189707	0.0117887	0.343874	N/S	Pentapeptide repeats (9 copies)
PF00587	0.27522	0.389894	0.334386	0.475787	0.0614447	0.542795	N/S	tRNA synthetase class II core domain (G, H, P, S and T)
PF13536	0.429286	0.209895	0.360224	0.00305265	0.0746681	0.00171139	N/S	Putative multidrug resistance efflux transporter
PF00625	0.444043	0.32593	0.228117	0.20222	0.00465099	0.092038	N/S	Guanylate kinase
PF00627	0.378737	0.289193	0.332029	0.0690275	0.41726	0.0104061	N/S	UBA/TS-N domain
PF13602	0.355298	0.355355	0.286451	0.902852	0.598324	0.853991	N/S	Zinc-binding dehydrogenase
PF14108	0.399609	0.271584	0.328032	0.0172423	0.00111229	0.0501886	N/S	ABA DEFICIENT 4-like
PF00483	0.37552	0.285567	0.333055	0.992703	0.284215	0.17489	N/S	Nucleotidyl transferase
PF00472	0.318456	0.364388	0.286317	0.949817	0.615832	0.981232	N/S	RF-1 domain
PF14023	0.346726	0.331687	0.28036	0.883224	0.795857	0.952609	N/S	Protein of unknown function (DUF4239)
PF13879	0.476248	0.279758	0.241368	0.0375465	0.0614146	0.0179424	N/S	Hemingway/CFA97
PF00375	0.547512	0.245261	0.198197	0.873489	0.790746	0.958473	N/S	Sodium:dicarboxylate symporter family
PF13848	0.264328	0.424012	0.311383	0.565819	0.0109313	0.377047	N/S	Thioredoxin-like domain
PF00389	0.40412	0.354416	0.238464	0.145921	0.00138154	0.851874	N/S	D-isomer specific 2-hydroxyacid dehydrogenase, catalytic domain
PF13847	0.341919	0.305504	0.351092	0.252604	0.987561	0.0168632	N/S	Methyltransferase domain
PF13740	0.454265	0.276774	0.248261	0.0852378	0.0259109	0.838209	N/S	ACT domain
PF13839	0.381747	0.240794	0.363547	0.021673	0.576246	0.00219964	N/S	GDSL/SGNH-like Acyl-Esterase family found in Pmr5 and Cas1p
PF00420	0.228803	0.729121	0.0344713	0.550539	0.4351	0.344923	N/S	NADH-ubiquinone/plastoquinone oxidoreductase chain 4L
PF13806	0.311652	0.491344	0.196733	0.771963	0.0724774	0.0202449	N/S	Rieske-like [2Fe-2S] domain
PF00438	0.479715	0.263467	0.256776	0.00738006	0.00958079	0.0370918	N/S	S-adenosylmethionine synthetase, N-terminal domain
PF13774	0.355521	0.366197	0.276377	0.810362	0.0186811	0.0885594	N/S	Regulated-SNARE-like domain
PF00450	0.320994	0.428148	0.249963	0.609016	0.177698	0.00284344	N/S	Serine carboxypeptidase
PF00467	0.310867	0.425172	0.263825	0.349686	0.744876	0.0138876	N/S	KOW motif
PF13813	0.461279	0.247515	0.269303	0.0454548	0.039454	0.823605	N/S	Membrane bound O-acyl transferase family
PF10604	0.219939	0.526166	0.24378	0.0751986	0.802042	0.00109403	N/S	Polyketide cyclase / dehydrase and lipid transport
PF12867	0.132347	0.773317	0.0827764	0.0559686	0.996805	0.00119952	N/S	DinB superfamily
PF01795	0.318736	0.336335	0.294105	0.86342	0.928341	0.807355	N/S	MraW methylase family
PF01980	0.40646	0.273308	0.278408	0.873489	0.954729	0.720216	N/S	tRNA-methyltransferase O
PF10419	0.296642	0.261584	0.365771	0.943202	0.954098	0.733133	N/S	TFIIIC subunit triple barrel domain
PF01883	0.352312	0.266934	0.370863	0.284169	0.666827	0.154243	N/S	Iron-sulfur cluster assembly protein
PF02096	0.372431	0.293607	0.33315	0.0672965	0.389807	0.0123793	N/S	60Kd inner membrane protein
PF01774	0.401693	0.269649	0.325547	0.0561056	0.66421	0.00343093	N/S	UreD urease accessory protein
PF02099	0.450947	0.220557	0.324967	0.0100758	0.15464	0.0027364	N/S	Josephin
PF08996	0.27851	0.323862	0.390126	0.428618	0.425239	0.00630687	N/S	DNA Polymerase alpha zinc finger
PF02463	0.397004	0.301538	0.298228	0.333276	0.838538	0.0367798	N/S	RecF/RecN/SMC N terminal domain
PF10475	0.230998	0.346641	0.413188	0.597301	0.0104387	0.0315557	N/S	Vacuolar-sorting protein 54, of GARP complex
PF02567	0.469198	0.238509	0.248392	0.361334	0.93254	0.0534603	N/S	Phenazine biosynthesis-like protein
PF10152	0.386552	0.267425	0.330526	0.55089	0.794017	0.0929747	N/S	Subunit CCDC53 of WASH complex
PF09368	0.228157	0.325458	0.432443	0.934038	0.00359938	0.00135291	N/S	Sas10 C-terminal domain
PF01894	0.362181	0.393182	0.238464	0.657826	0.0311111	0.143366	N/S	Uncharacterised protein family UPF0047
PF09799	0.364126	0.337716	0.297526	0.0234975	0.100499	0.0101727	N/S	Predicted membrane protein
PF02559	0.251477	0.380359	0.353795	0.406758	0.0717903	0.557519	N/S	CarD-like/TRCF RID domain
PF02375	0.402863	0.242266	0.332063	0.0854416	0.072037	0.674745	N/S	jmjN domain
PF01985	0.433787	0.19907	0.363359	0.00931002	0.139708	0.0859571	N/S	CRS1 / YhbY (CRM) domain
PF01988	0.412768	0.321482	0.264003	0.248587	0.00535107	0.295593	N/S	VIT family
PF01849	0.288133	0.364616	0.347101	0.928106	0.0348081	0.0157843	N/S	NAC domain
PF02325	0.797871	0.144808	0.0524389	0.139515	0.0787643	0.467207	N/S	YGGT family
PF09296	0.24152	0.454899	0.264323	0.994711	0.49949	0.310079	N/S	NADH pyrophosphatase-like rudimentary NUDIX domain
PF02348	0.364387	0.410664	0.200372	0.874761	0.0153804	0.00918136	N/S	Cytidylyltransferase
PF02065	0.408061	0.283844	0.305743	0.155048	0.970535	0.0204307	N/S	Melibiase
PF08939	0.553303	0.205198	0.238505	0.0401064	0.0743976	0.0489127	N/S	Basophilic leukemia-expressed protein Bles03
PF08771	0.267334	0.378461	0.353243	0.360327	0.00739608	0.184819	N/S	FKBP12-rapamycin binding domain
PF01857	0.457746	0.271438	0.262185	0.0633471	0.0146829	0.746629	N/S	Retinoblastoma-associated protein B domain
PF09297	0.24152	0.454899	0.264323	0.994711	0.49949	0.310079	N/S	NADH pyrophosphatase zinc ribbon domain
PF10236	0.301696	0.28491	0.37281	0.938678	0.446143	0.4043	N/S	Mitochondrial ribosomal death-associated protein 3
PF10357	0.266225	0.35165	0.357705	0.0475348	0.0056073	0.928344	N/S	Domain of Kin17 curved DNA-binding protein
PF08781	0.354347	0.320254	0.318189	0.274914	0.292383	0.0416918	N/S	Transcription factor DP
PF02536	0.508852	0.279225	0.208267	0.0321139	0.00133648	0.316811	N/S	mTERF
PF02301	0.330676	0.440692	0.228562	0.0114238	0.00958079	0.0841489	N/S	HORMA domain
PF01858	0.457746	0.271438	0.262185	0.0633471	0.0146829	0.746629	N/S	Retinoblastoma-associated protein A domain
PF01755	0.35824	0.267161	0.372568	0.951969	0.276701	0.0172133	N/S	Glycosyltransferase family 25 (LPS biosynthesis protein)
PF08743	0.428525	0.281167	0.271612	0.344356	0.0957136	0.29581	N/S	Nse4 C-terminal
PF01753	0.456244	0.364207	0.167885	0.546394	0.0261586	0.0197226	N/S	MYND finger
PF02213	0.492191	0.20987	0.297517	0.00380942	0.0599779	0.00193428	N/S	GYF domain
PF02630	0.385748	0.276524	0.331632	0.070107	0.034782	0.417142	N/S	SCO1/SenC
PF02401	0.422655	0.253455	0.322557	0.0319016	0.416625	0.00188232	N/S	LytB protein
PF09446	0.279792	0.292124	0.418112	0.541961	0.14227	0.458567	N/S	VMA21-like domain
PF10185	0.202963	0.590265	0.203081	0.0598899	0.163956	0.0337374	N/S	Chaperone for wingless signalling and trafficking of LDL receptor
PF02629	0.304918	0.356737	0.333606	0.30709	0.978129	0.011142	N/S	CoA binding domain
PF10584	0.326764	0.287575	0.385453	0.51356	0.0195157	0.00106727	N/S	Proteasome subunit A N-terminal signature
PF02410	0.484207	0.347867	0.165056	0.265058	0.00107794	0.00517351	N/S	Ribosomal silencing factor during starvation
PF10563	0.354159	0.262025	0.382659	0.0970605	0.976798	0.00173704	N/S	Delta carbonic anhydrase
PF02415	0.66705	0.165857	0.157004	0.110016	0.138988	0.661018	N/S	Chlamydia polymorphic membrane protein (Chlamydia_PMP) repeat
PF01676	0.462793	0.2637	0.27254	0.0297381	0.0475364	0.0621026	N/S	Metalloenzyme superfamily
PF02149	0.443661	0.22742	0.325215	0.0488799	0.229234	0.00464656	N/S	Kinase associated domain 1
PF02170	0.299165	0.348475	0.345027	0.51676	0.025955	0.107595	N/S	PAZ domain
PF02167	0.249982	0.386478	0.361131	0.978388	0.0467631	0.0196833	N/S	Cytochrome C1 family
PF01641	0.376702	0.284393	0.338393	0.0896983	0.602789	0.00111474	N/S	SelR domain
PF02171	0.299165	0.348475	0.345027	0.51676	0.025955	0.107595	N/S	Piwi domain
PF01702	0.28397	0.343589	0.354083	0.0649075	0.00378659	0.797551	N/S	Queuine tRNA-ribosyltransferase
PF01747	0.29337	0.364991	0.341224	0.902852	0.031485	0.0680794	N/S	ATP-sulfurylase
PF02602	0.412592	0.202972	0.352895	0.17748	0.894315	0.00357133	N/S	Uroporphyrinogen-III synthase HemD
PF08718	0.360607	0.329985	0.306498	0.41978	0.153846	0.564212	N/S	Glycolipid transfer protein (GLTP)
PF01743	0.40347	0.285675	0.306378	0.00762365	0.404221	0.00652247	N/S	Poly A polymerase head domain
PF02163	0.392842	0.287706	0.310909	0.186972	0.678009	0.0396469	N/S	Peptidase family M50
PF02319	0.338721	0.35871	0.290495	0.596496	0.146857	0.891545	N/S	E2F/DP family winged-helix DNA-binding domain
PF10507	0.341049	0.296884	0.344505	0.618606	0.922061	0.3389	N/S	Transmembrane protein 65
PF10516	0.377606	0.348258	0.243598	0.971713	0.0630277	0.00579566	N/S	SHNi-TPR
PF09229	0.286193	0.203294	0.509989	0.122952	8.52195e-06	1.47954e-16	temperate	Activator of Hsp90 ATPase, N-terminal
PF13850	0.206354	0.295538	0.49774	0.293502	1.92425e-09	6.9638e-08	temperate	Endoplasmic Reticulum-Golgi Intermediate Compartment (ERGIC)
PF05964	0.126586	0.122747	0.750475	0.0263994	5.58724e-13	1.75465e-27	temperate	F/Y-rich N-terminus
PF05965	0.126586	0.122747	0.750475	0.0263994	5.58724e-13	1.75465e-27	temperate	F/Y rich C-terminus
PF09295	0.251071	0.122903	0.626016	0.00236323	2.95225e-09	3.23768e-28	temperate	ChAPs (Chs5p-Arf1p-binding proteins)
PF13870	0.293484	0.232642	0.47314	0.218902	0.000199918	3.81849e-12	temperate	Domain of unknown function (DUF4201)
PF09127	0.20914	0.345653	0.434209	0.704696	2.83499e-05	4.37589e-15	temperate	Leukotriene A4 hydrolase, C-terminal
PF05969	0.313248	0.384043	0.301856	0.382465	0.000321372	3.12361e-12	temperate	Photosystem II complex subunit Ycf12
PF06026	0.527034	0.418558	0.0528359	0.300419	2.96882e-11	4.80197e-15	temperate	Ribose 5-phosphate isomerase A (phosphoriboisomerase A)
PF13883	0.172842	0.278246	0.547532	0.389617	2.66745e-11	2.81203e-13	temperate	Pyridoxamine 5'-phosphate oxidase
PF06094	0.46264	0.451151	0.0697171	0.890028	2.12448e-07	7.1878e-14	temperate	Gamma-glutamyl cyclotransferase, AIG2-like
PF13851	0.192423	0.185325	0.622105	0.182258	3.52882e-15	1.15465e-25	temperate	Growth-arrest specific micro-tubule binding
PF13868	0.293746	0.194138	0.512098	0.0175612	3.5449e-05	1.44771e-20	temperate	Trichohyalin-plectin-homology domain
PF13884	0.201504	0.20249	0.591375	0.406758	4.56191e-09	1.53681e-20	temperate	Chaperone of endosialidase
PF13855	0.258306	0.163268	0.57841	0.0178574	6.654e-10	6.43306e-28	temperate	Leucine rich repeat
PF06093	0.419919	0.41392	0.153633	0.750206	0.000983445	0.000650747	temperate	Spt4/RpoE2 zinc finger
PF09261	0.192313	0.136296	0.670068	0.349589	8.85894e-12	2.19876e-29	temperate	Alpha mannosidase middle domain
PF06068	0.199895	0.162883	0.637177	0.120895	6.84696e-14	1.41445e-29	temperate	TIP49 P-loop domain
PF10591	0.0691782	0.29858	0.630924	0.169509	1.66977e-13	1.95167e-11	temperate	Secreted protein acidic and rich in cysteine Ca binding region
PF13802	0.189384	0.09825	0.712359	0.0023746	3.3971e-14	5.08345e-34	temperate	Glycosyl hydrolase 31 N-terminal galactose mutarotase-like domain
PF13656	0.539821	0.406397	0.0527201	0.162844	1.38985e-10	1.08898e-18	temperate	RNA polymerase Rpb3/Rpb11 dimerisation domain
PF13646	0.199196	0.15806	0.64274	0.0104462	1.01497e-15	4.86673e-31	temperate	HEAT repeats
PF06427	0.278017	0.126507	0.595439	0.0118001	1.64161e-08	2.30986e-27	temperate	UDP-glucose:Glycoprotein Glucosyltransferase
PF13641	0.33936	0.191486	0.469074	0.0222584	2.89544e-05	1.87804e-18	temperate	Glycosyltransferase like family 2
PF13640	0.284436	0.313094	0.40179	0.981701	3.5449e-05	4.61956e-05	temperate	2OG-Fe(II) oxygenase superfamily
PF06455	0.131243	0.581101	0.287428	0.15731	1.51465e-08	1.80489e-11	temperate	NADH dehydrogenase subunit 5 C-terminus
PF06468	0.453063	0.525535	0.0211237	0.165365	3.11315e-14	5.62392e-13	temperate	Spondin_N
PF13638	0.133293	0.340566	0.525934	0.0232392	5.32863e-10	6.88567e-07	temperate	PIN domain
PF06472	0.279244	0.18574	0.534683	0.0595414	1.39751e-05	1.04574e-19	temperate	ABC transporter transmembrane region 2
PF13637	0.293141	0.221593	0.485265	0.00228503	1.69966e-09	7.98493e-22	temperate	Ankyrin repeats (many copies)
PF08501	0.220194	0.272184	0.488154	0.848056	0.000731003	1.56454e-05	temperate	Shikimate dehydrogenase substrate binding domain
PF13632	0.351542	0.217393	0.430803	0.0495793	0.00059343	4.78e-12	temperate	Glycosyl transferase family group 2
PF13631	0.0237524	0.74824	0.228005	0.0408903	1.35085e-15	0.000244099	temperate	Cytochrome b(N-terminal)/b6/petB
PF13621	0.141802	0.447728	0.409529	0.0581915	1.37475e-06	1.73703e-06	temperate	Cupin-like domain
PF09384	0.212627	0.234062	0.540017	0.772594	0.000634361	1.65811e-07	temperate	UTP15 C terminal
PF09377	0.0646783	0.0777944	0.85695	0.341431	2.85334e-16	6.79614e-33	temperate	SBDS protein, domain II
PF13688	0.429021	0.549268	0	0.958159	0	0	temperate	Zinc Metallo-peptidase family M12
PF06417	0.323203	0.512708	0.159217	0.587592	0.000755271	0.00012867	temperate	Protein of unknown function (DUF1077)
PF08502	0.419517	0.44296	0.134658	0.824454	5.3464e-07	1.46998e-16	temperate	LeuA allosteric (dimerisation) domain
PF13793	0.16647	0.29205	0.541245	0.0274198	3.92339e-12	6.12381e-11	temperate	N-terminal domain of ribose phosphate pyrophosphokinase
PF06201	0.561518	0.339715	0.0987559	0.00304846	1.09695e-10	0.000221713	temperate	PITH domain of the 26S proteasome
PF08531	0.181255	0.260432	0.555142	0.484535	9.49493e-10	8.22434e-13	temperate	Alpha-L-rhamnosidase N-terminal domain
PF06212	0.490475	0.483982	0.0216915	0.589334	9.86898e-13	1.87777e-19	temperate	GRIM-19 protein
PF08523	0.672886	0.264106	0.0630054	0.00134006	3.30888e-10	3.10705e-06	temperate	Multiprotein bridging factor 1
PF06246	0.537903	0.451762	0	0.359931	0	0	temperate	Isy1-like splicing family
PF13772	0.46264	0.451151	0.0697171	0.890028	2.12448e-07	7.1878e-14	temperate	AIG2-like family
PF06098	0.27131	0.23952	0.488236	0.110016	0.000207263	7.95049e-12	temperate	Radial spoke protein 3
PF13771	0.126586	0.122747	0.750475	0.0263994	5.58724e-13	1.75465e-27	temperate	PHD-like zinc-binding domain
PF09334	0.257565	0.223323	0.518928	0.114369	1.87684e-08	4.05974e-20	temperate	tRNA synthetases class I (M)
PF13764	0.146473	0.0691131	0.784181	0.0612523	1.09614e-13	6.58653e-34	temperate	E3 ubiquitin-protein ligase UBR4
PF08512	0.348673	0.157813	0.493493	0.00842497	0.00078324	8.41759e-23	temperate	Histone chaperone Rttp106-like, middle domain
PF09340	0.430042	0.559112	0	0.621291	0	0	temperate	Histone acetyltransferase subunit NuA4
PF08506	0.143558	0.119611	0.732491	0.461616	1.83249e-12	1.77768e-27	temperate	Cse1
PF06367	0.140566	0.132553	0.724986	0.371999	6.11083e-13	1.17596e-26	temperate	Diaphanous FH3 Domain
PF06391	0.245167	0.271371	0.462074	0.886676	0.00025822	1.96158e-08	temperate	CDK-activating kinase assembly factor MAT1
PF13917	0.556501	0.378144	0.0647496	0.244443	5.26624e-05	8.72128e-06	temperate	Zinc knuckle
PF05958	0.162895	0.302442	0.53361	0.0517043	4.94059e-07	1.58669e-05	temperate	tRNA (Uracil-5-)-methyltransferase
PF05843	0.209972	0.200634	0.5828	0.804896	7.10532e-09	1.53868e-18	temperate	Suppressor of forked protein (Suf)
PF13949	0.127966	0.0655778	0.806316	0.0125795	7.39276e-11	2.49135e-27	temperate	ALIX V-shaped domain binding to HIV
PF14770	0.554736	0.391495	0.0421467	0.657826	1.05387e-08	1.48198e-22	temperate	Transmembrane protein 18
PF08636	0.619204	0.352426	0.0254354	0.10349	1.01518e-12	1.08348e-20	temperate	ER protein Pkr1
PF14769	0.665252	0.302321	0.0322224	0.009322	2.80143e-20	2.85342e-25	temperate	Flagellar C1a complex subunit C1a-32
PF08752	0.196169	0.104449	0.699366	0.00567675	8.76168e-14	3.49752e-33	temperate	Coatomer gamma subunit appendage platform subdomain
PF05676	0.523402	0.375749	0.0929731	0.800605	0.000949344	4.90846e-08	temperate	NADH-ubiquinone oxidoreductase B18 subunit (NDUFB7)
PF14752	0.197547	0.0776458	0.724575	0.0203315	4.80659e-10	8.08047e-30	temperate	Retinol binding protein receptor
PF08615	0.597619	0.387143	0	0.426686	0	0	temperate	Ribonuclease H2 non-catalytic subunit (Ylr154p-like)
PF08719	0.315297	0.115704	0.567442	0.14509	0.000449444	2.32659e-19	temperate	NADAR domain
PF14713	0.0680072	0.174549	0.757433	0.00398972	6.17124e-16	1.45562e-26	temperate	Domain of unknown function (DUF4464)
PF14646	0.0907362	0.0644952	0.844725	0.011439	1.39429e-16	3.12325e-35	temperate	MYCBP-associated protein family
PF14644	0.171699	0.0923975	0.735899	0.00148132	7.24316e-14	1.03126e-32	temperate	Domain of unknown function (DUF4456)
PF14635	0.167799	0.105236	0.726781	0.0250733	3.05937e-14	9.64505e-33	temperate	Helix-hairpin-helix motif
PF05700	0.355653	0.514341	0.128741	0.116577	1.59501e-05	8.93721e-15	temperate	Breast carcinoma amplified sequence 2 (BCAS2)
PF14633	0.167799	0.105236	0.726781	0.0250733	3.05937e-14	9.64505e-33	temperate	SH2 domain
PF08767	0.126166	0.357792	0.515809	0.0652786	5.95579e-15	1.03459e-16	temperate	CRM1 C terminal
PF14632	0.167799	0.105236	0.726781	0.0250733	3.05937e-14	9.64505e-33	temperate	Acidic N-terminal SPT6
PF14691	0.113681	0.236466	0.648029	0.470076	5.47373e-09	6.29664e-11	temperate	Dihydroprymidine dehydrogenase domain II, 4Fe-4S cluster
PF14772	0.279395	0.230015	0.49022	0.122952	5.18752e-06	6.04583e-16	temperate	Sperm tail
PF14775	0.279395	0.230015	0.49022	0.122952	5.18752e-06	6.04583e-16	temperate	Sperm tail C-terminal domain
PF05631	0.211088	0.332693	0.456102	0.0713833	4.82039e-09	5.26576e-05	temperate	Sugar-tranasporters, 12 TM
PF15260	0.502409	0.48738	0	0.548036	0	0	temperate	Protein family FAM219A
PF15138	0.129263	0.232445	0.63682	0.899271	4.77622e-14	3.65043e-24	temperate	Syncollin
PF14995	0.32865	0.668052	0	0.126779	0	0	temperate	Transmembrane protein
PF14938	0.190198	0.107333	0.701879	0.164603	1.06211e-11	1.03126e-32	temperate	Soluble NSF attachment protein, SNAP
PF14931	0.447533	0.394836	0.15264	0.674257	3.887e-05	3.27091e-07	temperate	Intraflagellar transport complex B, subunit 20
PF14882	0.439936	0.458653	0.0966287	0.330433	3.57064e-07	8.96262e-09	temperate	Integrase repeat unit
PF14878	0.167799	0.105236	0.726781	0.0250733	3.05937e-14	9.64505e-33	temperate	DLD
PF08695	0.231517	0.237147	0.522186	0.725825	8.77669e-05	1.68752e-08	temperate	Cytochrome oxidase complex assembly protein 1
PF14845	0.358071	0.161186	0.479231	0.281641	0.000191438	9.19308e-19	temperate	beta-acetyl hexosaminidase like
PF14843	0.0172646	0.0406393	0.940584	0.709569	7.6951e-17	1.20314e-34	temperate	Growth factor receptor domain IV
PF08701	0.593113	0.401656	0	0.13023	0	0	temperate	GNL3L/Grn1 putative GTPase
PF14813	0.442436	0.43517	0.118737	0.701154	1.06478e-05	1.84567e-08	temperate	NADH dehydrogenase 1 beta subcomplex subunit 2
PF05577	0.330011	0.190207	0.479627	0.0862817	1.33456e-05	1.55339e-20	temperate	Serine carboxypeptidase S28
PF14806	0.245573	0.103718	0.650702	0.00366363	1.72104e-11	4.54927e-34	temperate	Coatomer beta subunit appendage platform
PF05592	0.177323	0.356232	0.46568	0.064265	9.52626e-07	4.04265e-05	temperate	Bacterial alpha-L-rhamnosidase concanavalin-like domain
PF14777	0.616475	0.382544	0	0.0614853	0	0	temperate	Cilia BBSome complex subunit 10
PF05602	0.149174	0.336755	0.513998	0.00728346	1.37115e-11	4.5841e-06	temperate	Cleft lip and palate transmembrane protein 1 (CLPTM1)
PF14588	0.455248	0.480757	0.0579774	0.850821	1.46052e-09	2.38841e-14	temperate	YjgF/chorismate_mutase-like, putative endoribonuclease
PF05916	0.538997	0.303899	0.155663	0.0522417	2.32625e-07	7.63133e-07	temperate	GINS complex protein
PF08773	0.253494	0.134388	0.610501	0.284169	7.82287e-09	4.36837e-26	temperate	Cathepsin C exclusion domain
PF14560	0.303845	0.209734	0.486412	0.00790401	3.39891e-06	6.96121e-19	temperate	Ubiquitin-like domain
PF05832	0.50946	0.416867	0.0720255	0.307055	1.44079e-10	2.09104e-09	temperate	Eukaryotic protein of unknown function (DUF846)
PF09037	0.24261	0.119482	0.637669	0.0398246	3.25854e-05	2.92088e-18	temperate	Stf0 sulphotransferase
PF05834	0.277672	0.0964501	0.625654	0.0177195	3.99305e-05	1.08803e-23	temperate	Lycopene cyclase protein
PF06522	0.402451	0.553254	0.0426507	0.730177	4.08804e-12	7.10864e-11	temperate	NADH-ubiquinone reductase complex 1 MLRQ subunit
PF09066	0.271338	0.149683	0.578976	0.00144477	1.35373e-09	5.50008e-31	temperate	Beta2-adaptin appendage, C-terminal sub-domain
PF09084	0.652545	0.339248	0.00820643	0.00175351	5.64308e-16	6.06541e-18	temperate	NMT1/THI5 like
PF14288	0.122391	0.0810139	0.796566	0.0199341	4.90271e-16	1.03606e-34	temperate	1,3-beta-glucan synthase subunit FKS1, domain-1
PF14308	0.185058	0.412622	0.395271	0.846806	4.21253e-05	1.53808e-06	temperate	X-domain of DnaJ-containing
PF14252	0.0166084	0.983388	0	0.00237491	0	0	temperate	Domain of unknown function (DUF4347)
PF09088	0.294549	0.0895565	0.615568	0.0126043	0.000191069	3.15669e-20	temperate	MIF4G like
PF14240	0.708709	0.225549	0.0602509	0.260168	0.000128768	1.16048e-05	temperate	YHYH protein
PF14237	0.0792542	0.101699	0.818956	0.17025	1.59932e-16	3.69975e-32	temperate	GYF domain 2
PF08557	0.201423	0.255359	0.540723	0.943202	7.84302e-12	7.03687e-20	temperate	Sphingolipid Delta4-desaturase (DES)
PF14087	0.335999	0.588452	0.0709788	0.167768	2.97856e-06	4.8288e-20	temperate	Domain of unknown function (DUF4267)
PF13959	0.213524	0.255805	0.518621	0.75772	0.000392054	4.38026e-07	temperate	Domain of unknown function (DUF4217)
PF05899	0.0803081	0.86789	0.0515322	0.44758	5.49546e-07	1.39639e-14	temperate	EutQ-like cupin domain
PF14241	0.0520827	0.298875	0.649035	0.0013963	9.89107e-15	1.2697e-16	temperate	DUF4341
PF14310	0.219415	0.20895	0.570287	0.902852	2.61305e-09	5.30582e-20	temperate	Fibronectin type III-like domain
PF05808	0.0682005	0.185112	0.746608	0.0457375	4.12423e-06	1.3958e-19	temperate	Podoplanin
PF08969	0.181309	0.0909346	0.727266	0.0525543	1.47033e-12	2.05066e-30	temperate	USP8 dimerisation domain
PF08603	0.170682	0.154547	0.674423	0.0969711	5.90824e-13	2.51668e-26	temperate	Adenylate cyclase associated (CAP) C terminal
PF14559	0.22613	0.149112	0.624756	0.00360003	2.63288e-13	4.86673e-31	temperate	Tetratricopeptide repeat
PF14543	0.177226	0.207039	0.608527	0.785007	3.89233e-10	3.34965e-18	temperate	Xylanase inhibitor N-terminal
PF14541	0.177226	0.207039	0.608527	0.785007	3.89233e-10	3.34965e-18	temperate	Xylanase inhibitor C-terminal
PF14533	0.267216	0.203525	0.529184	0.0507851	6.32227e-08	2.22743e-20	temperate	Ubiquitin-specific protease C-terminal
PF08811	0.247407	0.157047	0.595509	0.018994	1.84351e-10	6.01084e-29	temperate	Protein of unknown function (DUF1800)
PF14520	0.807137	0.192535	0	0.0407997	0	0	temperate	Helix-hairpin-helix domain
PF05768	0.645096	0.350996	0	0.130052	0	0	temperate	Glutaredoxin-like domain (DUF836)
PF08888	0.609184	0.320092	0.0705251	0.0391149	1.75648e-09	1.03162e-10	temperate	HopJ type III effector protein
PF14392	0.556501	0.378144	0.0647496	0.244443	5.26624e-05	8.72128e-06	temperate	Zinc knuckle
PF08920	0.0602881	0.116673	0.823007	0.014039	3.8832e-17	4.54927e-34	temperate	Splicing factor 3B subunit 1
PF14370	0.147609	0.159928	0.688343	0.51726	1.94539e-12	1.51773e-23	temperate	C-terminal topoisomerase domain
PF05786	0.414004	0.568549	0	0.473381	0	0	temperate	Condensin complex subunit 2
PF08598	0.27272	0.147991	0.579107	0.0368521	1.10401e-05	2.99481e-24	temperate	Sds3-like
PF14347	0.445649	0.498565	0.0538022	0.292144	2.48276e-12	2.85366e-11	temperate	Domain of unknown function (DUF4399)
PF05794	0.214356	0.157195	0.621888	0.342792	1.09748e-05	7.51254e-16	temperate	T-complex protein 11
PF08583	0.426025	0.556996	0.0128116	0.412724	1.89837e-17	2.97981e-34	temperate	Cytochrome c oxidase biogenesis protein Cmc1 like
PF08806	0.30751	0.610546	0.0819081	0.0175612	1.69323e-10	8.48656e-20	temperate	Sep15/SelM redox domain
PF13606	0.127602	0.254305	0.617633	0.211412	1.55809e-12	9.41874e-17	temperate	Ankyrin repeat
PF06865	0.428551	0.568619	0	0.406785	0	0	temperate	Pyrimidine/purine nucleoside phosphorylase
PF06549	0.482612	0.422304	0.0949776	0.086051	9.78362e-12	6.80623e-07	temperate	Protein of unknown function (DUF1118)
PF12471	0.242547	0.117739	0.639536	0.0391675	4.46007e-05	9.69153e-21	temperate	GTP cyclohydrolase N terminal
PF12465	0.222845	0.233451	0.541825	0.76993	9.18167e-11	3.61261e-16	temperate	Proteasome beta subunits C terminal
PF12456	0.121774	0.182359	0.689132	0.446163	3.40002e-11	3.81541e-17	temperate	Inositol phosphatase
PF10282	0.0999542	0.180078	0.719855	0.0934412	2.09674e-15	4.5476e-27	temperate	Lactonase, 7-bladed beta-propeller
PF12437	0.194037	0.187374	0.61789	0.982945	4.54549e-11	2.22406e-21	temperate	Glutamine synthetase type III N terminal
PF12436	0.267216	0.203525	0.529184	0.0507851	6.32227e-08	2.22743e-20	temperate	ICP0-binding domain of Ubiquitin-specific protease 7
PF10294	0.343677	0.442767	0.210226	0.763235	0.000202533	2.37042e-07	temperate	Lysine methyltransferase
PF12481	0.214151	0.115913	0.669927	0.00486319	3.92696e-08	4.47129e-27	temperate	Aluminium induced protein
PF12400	0.17326	0.298445	0.528223	0.00299869	1.38631e-07	5.47207e-05	temperate	STIMATE family
PF12371	0.0731595	0.170148	0.752638	0.258588	6.53162e-13	2.86007e-20	temperate	Transmembrane protein 131-like N-terminal
PF12349	0.293807	0.199896	0.506258	0.0185616	0.000196868	5.92663e-18	temperate	Sterol-sensing domain of SREBP cleavage-activation
PF10381	0.181576	0.0811387	0.73589	0.179194	1.72104e-11	2.63368e-32	temperate	Autophagy_C
PF10408	0.164227	0.0874325	0.748337	0.00191117	4.56583e-15	1.32798e-34	temperate	Ubiquitin elongating factor core
PF12317	0.251199	0.139801	0.608981	0.00361546	1.51375e-06	4.44069e-24	temperate	Intraflagellar transport complex B protein 46 C terminal
PF12265	0.218751	0.280757	0.499458	0.382802	9.12918e-08	6.69109e-10	temperate	Histone-binding protein RBBP4 or subunit C of CAF1 complex
PF07890	0.525341	0.430409	0.028453	0.540251	5.30937e-16	1.89641e-27	temperate	Rrp15p
PF07859	0.335622	0.0691986	0.595173	0.00267756	1.55601e-08	1.07232e-30	temperate	alpha/beta hydrolase fold
PF10262	0.488034	0.341991	0.169956	0.0166229	4.34871e-08	4.09024e-05	temperate	Rdx family
PF10258	0.352036	0.643775	0	0.151921	0	0	temperate	Phosphorylated adapter RNA export protein, RNA-binding domain
PF12569	0.0910872	0.10668	0.798197	0.512489	9.36441e-15	1.06687e-29	temperate	N-terminal acetyltransferase A, auxiliary subunit
PF08315	0.646376	0.353528	0	0.00875591	0	0	temperate	cwf18 pre-mRNA splicing factor
PF12769	0.129476	0.18702	0.682551	0.995956	1.82446e-16	1.1383e-31	temperate	4TM region of pyridine nucleotide transhydrogenase, mitoch
PF10217	0.547336	0.440719	0	0.279337	0	0	temperate	Uncharacterized conserved protein (DUF2039)
PF12766	0.425534	0.396942	0.174777	0.108893	2.85245e-05	0.000597913	temperate	Pyridoxamine 5'-phosphate oxidase
PF07716	0.0436845	0.1935	0.76101	0.597897	3.65487e-15	4.04608e-19	temperate	Basic region leucine zipper
PF10222	0.171572	0.482887	0.345361	0.0302887	0.000569594	6.26385e-13	temperate	Uncharacterized conserved protein (DUF2152)
PF07718	0.245573	0.103718	0.650702	0.00366363	1.72104e-11	4.54927e-34	temperate	Coatomer beta C-terminal region
PF08295	0.227415	0.137143	0.6354	0.0103619	2.45654e-11	4.13212e-30	temperate	Sin3 family co-repressor
PF08282	0.213747	0.207894	0.578301	0.0723161	5.40171e-13	4.93977e-26	temperate	haloacid dehalogenase-like hydrolase
PF12710	0.247049	0.181552	0.568923	0.18679	6.15157e-07	8.24954e-19	temperate	haloacid dehalogenase-like hydrolase
PF12681	0.543378	0.365928	0.0905659	0.00855208	9.65064e-09	4.99916e-07	temperate	Glyoxalase-like domain
PF07731	0.17198	0.807254	0.0187735	0.473014	1.30019e-10	4.97023e-19	temperate	Multicopper oxidase
PF07732	0.17198	0.807254	0.0187735	0.473014	1.30019e-10	4.97023e-19	temperate	Multicopper oxidase
PF12662	0.0172646	0.0406393	0.940584	0.709569	7.6951e-17	1.20314e-34	temperate	Complement Clr-like EGF-like
PF12661	0.139873	0.143245	0.716345	0.374356	8.19614e-16	9.53937e-32	temperate	Human growth factor-like EGF
PF07748	0.192313	0.136296	0.670068	0.349589	8.85894e-12	2.19876e-29	temperate	Glycosyl hydrolases family 38 C-terminal domain
PF10250	0.750667	0.225104	0.024008	0.0686482	7.4498e-11	4.48017e-11	temperate	GDP-fucose protein O-fucosyltransferase
PF07915	0.282253	0.192152	0.525403	0.052373	1.15625e-06	5.92546e-22	temperate	Glucosidase II beta subunit-like protein
PF07690	0.158824	0.185832	0.655191	0.890028	3.31153e-13	4.68744e-21	temperate	Major Facilitator Superfamily
PF12230	0.459783	0.514829	0.0253452	0.148188	2.93869e-14	9.99273e-08	temperate	Pre-mRNA splicing factor PRP21 like protein
PF08213	0.558274	0.414718	0.0138481	0.473014	2.43173e-21	7.13803e-31	temperate	Mitochondrial mRNA-processing protein COX24, C-terminal
PF10539	0.177748	0.202296	0.611297	0.9758	0.0001228	5.15185e-08	temperate	Development and cell death domain
PF08030	0.0203464	0.0503196	0.928	0.382465	3.8832e-17	3.19713e-34	temperate	Ferric reductase NAD binding domain
PF10937	0.376192	0.55162	0.0634887	0.299854	2.68368e-08	2.75963e-17	temperate	Alpha-ketoglutarate dehydrogenase component 4/YMR-31
PF10791	0.229315	0.760686	0.00963456	0.120895	1.77358e-16	8.68773e-25	temperate	Mitochondrial F1-F0 ATP synthase subunit F of fungi
PF10718	0.577078	0.337518	0.0829617	0.100704	1.03277e-06	6.72772e-12	temperate	Hypothetical chloroplast protein Ycf34
PF10615	0.102309	0.346196	0.55134	0.0174277	1.20332e-12	1.79477e-11	temperate	Domain of unknown function (DUF2470)
PF08075	0.168421	0.238557	0.590823	0.587951	1.17609e-12	2.15706e-15	temperate	NOPS (NUC059) domain
PF10518	0.445649	0.498565	0.0538022	0.292144	2.48276e-12	2.85366e-11	temperate	TAT (twin-arginine translocation) pathway signal sequence
PF08082	0.232057	0.194552	0.57292	0.425647	2.85443e-11	1.05047e-27	temperate	PRO8NT (NUC069), PrP8 N-terminal domain
PF08083	0.232057	0.194552	0.57292	0.425647	2.85443e-11	1.05047e-27	temperate	PROCN (NUC071) domain
PF08084	0.232057	0.194552	0.57292	0.425647	2.85443e-11	1.05047e-27	temperate	PROCT (NUC072) domain
PF10598	0.232057	0.194552	0.57292	0.425647	2.85443e-11	1.05047e-27	temperate	RNA recognition motif of the spliceosomal PrP8
PF10597	0.232057	0.194552	0.57292	0.425647	2.85443e-11	1.05047e-27	temperate	U5-snRNA binding site 2 of PrP8
PF08122	0.468244	0.507574	0.0183065	0.695148	1.74832e-14	2.28555e-21	temperate	NADH-ubiquinone oxidoreductase B12 subunit family
PF08123	0.194363	0.156686	0.648675	0.073859	3.80812e-11	1.62027e-24	temperate	Histone methylation protein DOT1
PF10596	0.232057	0.194552	0.57292	0.425647	2.85443e-11	1.05047e-27	temperate	U6-snRNA interacting domain of PrP8
PF10601	0.507965	0.411962	0.0708282	0.948187	2.04196e-07	3.85938e-19	temperate	LITAF-like zinc ribbon domain
PF11209	0.20135	0.15133	0.646344	0.0921051	9.68273e-06	1.07874e-15	temperate	LmeA-like phospholipid-binding
PF08145	0.242114	0.207194	0.549172	0.0870892	1.05383e-05	8.03458e-09	temperate	BOP1NT (NUC169) domain
PF08022	0.0203464	0.0503196	0.928	0.382465	3.8832e-17	3.19713e-34	temperate	FAD-binding domain
PF12118	0.141496	0.19471	0.657858	0.5496	2.16607e-09	2.43933e-16	temperate	SprA-related family
PF07970	0.186618	0.283317	0.529825	0.223468	1.06211e-11	1.17851e-10	temperate	Endoplasmic reticulum vesicle transporter
PF12108	0.184907	0.17562	0.636811	0.638126	6.47109e-14	2.74913e-30	temperate	Splicing factor SF3a60 binding domain
PF07974	0.114932	0.0877488	0.797309	0.024211	3.12134e-16	1.67116e-34	temperate	EGF-like domain
PF07977	0.232213	0.216014	0.551513	0.470533	1.35928e-05	8.39077e-12	temperate	FabA-like domain
PF07978	0.564664	0.298771	0.136462	0.00484512	7.71272e-08	0.000890751	temperate	NIPSNAP
PF12047	0.470141	0.35553	0.170076	0.121113	6.42182e-05	3.64237e-05	temperate	Cytosine specific DNA methyltransferase replication foci domain
PF11998	0.522937	0.381507	0.0945269	0.114253	2.05958e-10	1.56101e-10	temperate	Low psii accumulation1 / Rep27
PF11977	0.444395	0.536616	0	0.833214	0	0	temperate	Zc3h12a-like Ribonuclease NYN domain
PF11976	0.564674	0.359826	0.0754488	0.0316165	1.4222e-10	1.92628e-06	temperate	Ubiquitin-2 like Rad60 SUMO-like
PF11969	0.125019	0.357425	0.517534	0.00782832	5.62568e-14	2.8358e-08	temperate	Scavenger mRNA decapping enzyme C-term binding
PF11931	0.184907	0.17562	0.636811	0.638126	6.47109e-14	2.74913e-30	temperate	SF3a60/Prp9 C-terminal
PF08161	0.227457	0.139353	0.628879	0.249489	0.000101049	7.20137e-14	temperate	Ribosomal RNA-processing protein 12, HEAT repeats
PF08155	0.283301	0.176691	0.539962	0.011603	3.26792e-06	4.24701e-21	temperate	NOGCT (NUC087) domain
PF08007	0.322746	0.156267	0.520981	0.00111675	2.55071e-07	1.37464e-26	temperate	JmjC domain
PF08152	0.283156	0.102699	0.610077	0.184753	9.61261e-05	1.0293e-15	temperate	GUCT (NUC152) domain
PF08148	0.234614	0.236097	0.5251	0.997979	2.17594e-08	3.18458e-15	temperate	DSHCT (NUC185) domain
PF12134	0.232057	0.194552	0.57292	0.425647	2.85443e-11	1.05047e-27	temperate	PRP8 domain IV core
PF10208	0.185797	0.323496	0.490203	0.532555	5.55271e-11	5.33457e-08	temperate	ARMET, C-terminal
PF07683	0.225221	0.315256	0.459387	0.317435	1.87884e-12	5.04361e-10	temperate	Cobalamin synthesis protein cobW C-terminal domain
PF12815	0.278719	0.102686	0.618516	0.00649109	2.31626e-05	3.86729e-25	temperate	Spt5 C-terminal nonapeptide repeat binding Spt4
PF09742	0.0786369	0.160075	0.760816	0.0292701	2.1152e-14	7.36615e-24	temperate	Dyggve-Melchior-Clausen syndrome protein
PF09766	0.336724	0.151753	0.489255	0.817704	0.000123268	1.0221e-11	temperate	Fms-interacting protein/Thoc5
PF06957	0.233231	0.187846	0.578759	0.0643735	1.06211e-11	2.99867e-24	temperate	Coatomer (COPI) alpha subunit C-terminus
PF13417	0.247696	0.266436	0.485493	0.837099	5.43019e-11	6.85701e-18	temperate	Glutathione S-transferase, N-terminal domain
PF08438	0.296333	0.633731	0.0689807	0.0572901	8.2591e-05	8.52849e-15	temperate	Obg-like GTPase YGR210-like, G4 motif-containing domain
PF13398	0.0378153	0.0793158	0.882178	0.382595	7.48257e-17	9.48553e-33	temperate	Peptidase M50B-like
PF08436	0.274934	0.157007	0.56776	0.0699546	5.43178e-06	1.8149e-21	temperate	1-deoxy-D-xylulose 5-phosphate reductoisomerase C-terminal domain
PF09696	0.449918	0.530862	0	0.623694	0	0	temperate	Ctf8
PF09778	0.485669	0.428385	0.0663418	0.524752	1.4659e-11	1.49796e-16	temperate	Guanylylate cyclase
PF13365	0.175507	0.135159	0.689259	0.0451839	2.42915e-14	2.43007e-31	temperate	Trypsin-like peptidase domain
PF13359	0.408165	0.581581	0	0.309835	0	0	temperate	DDE superfamily endonuclease
PF13358	0.489281	0.476259	0.0233148	0.776017	1.10781e-14	9.14542e-29	temperate	DDE superfamily endonuclease
PF07019	0.69486	0.29868	0	0.215995	0	0	temperate	EMC6
PF13350	0.590797	0.374843	0.0339742	0.0223439	2.7425e-14	4.29993e-24	temperate	Tyrosine phosphatase family
PF07045	0.123893	0.337683	0.537643	0.137864	2.06969e-06	3.39933e-05	temperate	Domain of unknown function (DUF1330)
PF13307	0.228093	0.205855	0.565547	0.162099	7.58555e-11	1.76477e-24	temperate	Helicase C-terminal domain
PF13383	0.408545	0.502714	0.0817319	0.907467	1.07171e-10	9.01931e-14	temperate	Methyltransferase domain
PF06941	0.0184347	0.19949	0.781068	0.102009	3.1855e-16	3.19567e-26	temperate	5' nucleotidase, deoxy (Pyrimidine), cytosolic type C protein (NT5C)
PF09597	0.362089	0.579772	0.0477028	0.324732	8.61073e-11	1.75485e-21	temperate	IGR protein motif
PF13472	0.238693	0.324185	0.435499	0.524752	1.02217e-06	9.20786e-13	temperate	GDSL-like Lipase/Acylhydrolase family
PF09424	0.413484	0.45587	0.121768	0.484528	2.47468e-12	1.13633e-12	temperate	Yqey-like protein
PF08490	0.119518	0.203949	0.66975	0.618606	3.82775e-12	6.29655e-18	temperate	Domain of unknown function (DUF1744)
PF06658	0.50144	0.495501	0	0.120168	0	0	temperate	Protein of unknown function (DUF1168)
PF06664	0.213933	0.196157	0.582733	0.853249	3.47607e-07	1.24886e-14	temperate	Wnt-binding factor required for Wnt secretion
PF13598	0.34314	0.545691	0.111112	0.919643	3.75421e-07	3.19494e-12	temperate	Domain of unknown function (DUF4139)
PF09451	0.20677	0.311563	0.479781	0.424377	2.16028e-08	5.8654e-15	temperate	Autophagy-related protein 27
PF06733	0.0831176	0.202327	0.71306	0.112167	7.24715e-15	2.48807e-26	temperate	DEAD_2
PF13558	0.154929	0.159213	0.67762	0.769213	1.46601e-11	3.45093e-23	temperate	SbcC/RAD50-like, Walker B motif
PF06777	0.0831176	0.202327	0.71306	0.112167	7.24715e-15	2.48807e-26	temperate	Helical and beta-bridge domain
PF13537	0.213248	0.116174	0.670575	0.00255435	4.93538e-09	7.50547e-29	temperate	Glutamine amidotransferase domain
PF06825	0.56959	0.38924	0.0411241	0.0129179	1.2584e-10	1.76106e-12	temperate	Heat shock factor binding protein 1
PF06827	0.256961	0.160704	0.582211	0.0282592	1.42292e-05	9.80075e-20	temperate	Zinc finger found in FPG and IleRS
PF13532	0.101426	0.267714	0.626732	0.219773	1.55703e-10	2.69685e-10	temperate	2OG-Fe(II) oxygenase superfamily
PF13520	0.105396	0.127536	0.765229	0.716999	9.00059e-17	1.82725e-34	temperate	Amino acid permease
PF09495	0.615563	0.382582	0	0.1074	0	0	temperate	Protein of unknown function (DUF2462)
PF06883	0.248974	0.107575	0.643394	0.00486653	4.40686e-06	6.96137e-24	temperate	RNA polymerase I, Rpa2 specific domain
PF13477	0.189362	0.161651	0.642026	0.502346	5.67314e-10	2.42004e-21	temperate	Glycosyl transferase 4-like
PF09785	0.366982	0.178446	0.454131	0.0443678	0.000205227	1.68532e-16	temperate	Prp31 C terminal domain
PF08423	0.807137	0.192535	0	0.0407997	0	0	temperate	Rad51
PF13297	0.184907	0.17562	0.636811	0.638126	6.47109e-14	2.74913e-30	temperate	Replication stress response SDE2 C-terminal
PF08412	0.340791	0.150034	0.509166	0.00216509	0.000243571	7.68213e-21	temperate	Ion transport protein N-terminal
PF10178	0.633026	0.301577	0.0554979	0.324746	2.66622e-12	1.0136e-16	temperate	Proteasome assembly chaperone 3
PF07645	0.0766826	0.13839	0.784342	0.799146	3.33497e-16	1.643e-29	temperate	Calcium-binding EGF domain
PF07646	0.0653282	0.155718	0.769589	0.817076	3.79283e-15	9.37476e-26	temperate	Kelch motif
PF13174	0.239381	0.158914	0.601701	0.00399504	7.42757e-13	1.48173e-30	temperate	Tetratricopeptide repeat
PF08327	0.290504	0.167027	0.542196	0.0528582	9.68273e-06	2.03901e-20	temperate	Activator of Hsp90 ATPase homolog 1-like protein
PF10183	0.349282	0.63211	0.0170287	0.133105	3.50556e-27	3.74693e-40	temperate	ESSS subunit of NADH:ubiquinone oxidoreductase (complex I)
PF13088	0.660312	0.268093	0.0715482	0.0122867	1.12367e-10	1.77299e-08	temperate	BNR repeat-like domain
PF07650	0.446431	0.497884	0.0552444	0.61083	2.32044e-12	1.1633e-23	temperate	KH domain
PF13041	0.200182	0.29967	0.500145	0.00440985	9.84574e-14	3.65953e-25	temperate	PPR repeat family
PF13012	0.22257	0.223263	0.5533	0.934038	6.46127e-12	1.5495e-21	temperate	Maintenance of mitochondrial structure and function
PF08661	0.592414	0.353328	0.0541565	0.0203315	6.14397e-12	7.74731e-14	temperate	Replication factor A protein 3
PF12849	0.195632	0.35138	0.45234	0.187432	1.01616e-06	0.000237489	temperate	PBP superfamily domain
PF10192	0.18187	0.284352	0.533506	0.0245004	6.39729e-09	5.39449e-09	temperate	Rhodopsin-like GPCR transmembrane domain
PF12842	0.0744627	0.0854474	0.838361	0.967678	4.03183e-17	2.18732e-35	temperate	CCR4-Not complex, Not1 subunit, domain of unknown function DUF3819
PF07679	0.0334334	0.966284	0	0.0963321	0	0	temperate	Immunoglobulin I-set domain
PF12838	0.320406	0.388926	0.290449	0.175773	0.000194831	1.18771e-12	temperate	4Fe-4S dicluster domain
PF12836	0.0372104	0.0352129	0.927552	0.00923644	2.27824e-15	1.05896e-32	temperate	Helix-hairpin-helix motif
PF13176	0.154651	0.248126	0.595669	0.0907433	4.16434e-09	1.68171e-11	temperate	Tetratricopeptide repeat
PF09416	0.139545	0.185494	0.674733	0.0785923	5.14275e-14	1.25811e-27	temperate	RNA helicase (UPF2 interacting domain)
PF07529	0.280483	0.106556	0.612928	0.00316858	3.04172e-07	1.99581e-27	temperate	HSA domain
PF13183	0.133839	0.113763	0.751967	0.100704	5.95199e-13	1.22231e-27	temperate	4Fe-4S dicluster domain
PF09818	0.372817	0.120927	0.503769	0.130535	5.48892e-07	1.55099e-21	temperate	P-loop domain
PF13288	0.274934	0.157007	0.56776	0.0699546	5.43178e-06	1.8149e-21	temperate	DXP reductoisomerase C-terminal domain
PF13246	0.244055	0.220953	0.534827	0.401133	1.38984e-11	5.10287e-22	temperate	Cation transport ATPase (P-type)
PF07209	0.423334	0.434871	0.137675	0.56188	1.43309e-08	1.7681e-08	temperate	Protein of unknown function (DUF1415)
PF08389	0.140626	0.322182	0.537123	0.0279598	6.51949e-15	1.56554e-18	temperate	Exportin 1-like protein
PF09820	0.555497	0.443731	0	0.108122	0	0	temperate	Predicted AAA-ATPase
PF07289	0.19758	0.197232	0.600163	0.384927	3.09717e-10	4.9645e-21	temperate	Bardet-Biedl syndrome 5 protein
PF13237	0.320406	0.388926	0.290449	0.175773	0.000194831	1.18771e-12	temperate	4Fe-4S dicluster domain
PF10162	0.0216922	0.030208	0.947972	0.159021	5.83281e-17	2.9962e-35	temperate	G8 domain
PF07386	0.602892	0.301746	0.0953584	0.00163008	5.76557e-13	1.95387e-09	temperate	Protein of unknown function (DUF1499)
PF13234	0.175063	0.265575	0.556586	0.341431	9.26375e-10	2.87058e-13	temperate	Mtr4-like, beta-barrel domain
PF10163	0.434834	0.542372	0.0169872	0.421524	1.59563e-20	4.32895e-36	temperate	Transcription factor e(y)2
PF13232	0.582051	0.409214	0	0.507734	0	0	temperate	Complex1_LYR-like
PF13229	0.252679	0.136161	0.61116	0.00102475	2.85443e-11	3.50029e-31	temperate	Right handed beta helix region
PF07479	0.145563	0.351546	0.502885	0.00931002	2.52571e-11	4.71994e-05	temperate	NAD-dependent glycerol-3-phosphate dehydrogenase C-terminus
PF13193	0.293208	0.164144	0.542646	0.00486319	2.70756e-07	4.78419e-29	temperate	AMP-binding enzyme C-terminal domain
PF10172	0.448927	0.512743	0	0.924974	0	0	temperate	Det1 complexing ubiquitin ligase
PF13180	0.137093	0.371268	0.491504	0.222227	3.76794e-14	5.40828e-22	temperate	PDZ domain
PF10501	0.628813	0.366232	0	0.191232	0	0	temperate	Ribosomal subunit 39S
PF03878	0.226275	0.151542	0.610207	0.769213	1.0855e-07	3.43774e-20	temperate	YIF1
PF05478	0.265411	0.234399	0.499869	0.179953	4.5476e-08	5.65639e-16	temperate	Prominin
PF01583	0.270073	0.311628	0.417762	0.981701	1.80668e-05	1.20055e-05	temperate	Adenylylsulphate kinase
PF01532	0.282253	0.192152	0.525403	0.052373	1.15625e-06	5.92546e-22	temperate	Glycosyl hydrolase family 47
PF01504	0.13866	0.274476	0.583147	0.696887	1.97931e-13	2.68973e-20	temperate	Phosphatidylinositol-4-phosphate 5-Kinase
PF01496	0.247069	0.153218	0.599688	0.0108237	7.47992e-13	3.40536e-31	temperate	V-type ATPase 116kDa subunit family
PF01493	0.200255	0.121784	0.677948	0.0188352	2.66745e-11	2.28369e-29	temperate	GXGXG motif
PF01491	0.357218	0.639192	0	0.125943	0	0	temperate	Frataxin-like domain
PF01488	0.169488	0.131159	0.699006	0.178852	7.43962e-11	6.48984e-25	temperate	Shikimate / quinate 5-dehydrogenase
PF01485	0.257118	0.172433	0.570299	0.0294788	1.14593e-07	4.07755e-21	temperate	IBR domain, a half RING-finger domain
PF01483	0.219024	0.773452	0	0.693952	0	0	temperate	Proprotein convertase P-domain
PF01480	0.170834	0.200978	0.626631	0.407624	2.74345e-13	3.87394e-21	temperate	PWI domain
PF01454	0.488148	0.455605	0.0354864	0.684713	5.03675e-14	2.45337e-17	temperate	MAGE homology domain
PF01437	0.0575273	0.323908	0.604896	0.93456	6.7862e-13	5.98109e-20	temperate	Plexin repeat
PF01429	0.149756	0.28877	0.560492	0.071899	1.05657e-08	1.29589e-07	temperate	Methyl-CpG binding domain
PF01426	0.108696	0.185708	0.703993	0.0924434	4.00591e-13	5.00929e-21	temperate	BAH domain
PF01423	0.383506	0.558737	0.0576839	0.257665	3.12252e-13	1.40315e-26	temperate	LSM domain
PF01417	0.269306	0.24006	0.490356	0.045492	2.06777e-05	8.71888e-17	temperate	ENTH domain
PF01409	0.280772	0.225399	0.493483	0.207321	2.00887e-06	7.44616e-18	temperate	tRNA synthetases class II core domain (F)
PF01591	0.183679	0.145451	0.670431	0.152858	7.58281e-14	1.13976e-29	temperate	6-phosphofructo-2-kinase
PF01593	0.288225	0.183057	0.528717	0.00319913	2.17594e-08	4.5033e-25	temperate	Flavin containing amine oxidoreductase
PF01594	0.208447	0.212646	0.577966	0.334853	2.02155e-12	6.04655e-21	temperate	AI-2E family transporter
PF01597	0.253098	0.674116	0.0727575	0.0122803	2.33903e-07	2.28595e-17	temperate	Glycine cleavage H-protein
PF01813	0.24487	0.165519	0.589374	0.0732447	2.03376e-09	3.99827e-25	temperate	ATP synthase subunit D
PF01812	0.490469	0.503015	0	0.152341	0	0	temperate	5-formyltetrahydrofolate cyclo-ligase family
PF01808	0.112168	0.0668331	0.820869	0.0462655	2.41145e-14	2.54757e-33	temperate	AICARFT/IMPCHase bienzyme
PF01794	0.0203464	0.0503196	0.928	0.382465	3.8832e-17	3.19713e-34	temperate	Ferric reductase like transmembrane component
PF01783	0.389823	0.503589	0.0917496	0.668678	1.00163e-08	2.28595e-17	temperate	Ribosomal L32p protein family
PF01779	0.300527	0.176462	0.522599	0.743224	2.69076e-07	7.13165e-17	temperate	Ribosomal L29e protein family
PF01740	0.277717	0.247136	0.468216	0.632943	0.000141834	8.88362e-09	temperate	STAS domain
PF01722	0.429273	0.488367	0.0779176	0.781194	2.41337e-12	4.86445e-12	temperate	BolA-like protein
PF01408	0.32395	0.235286	0.440598	0.279337	1.94451e-05	3.11568e-14	temperate	Oxidoreductase family, NAD-binding Rossmann fold
PF01716	0.287574	0.233424	0.478943	0.191862	6.30933e-05	1.53822e-11	temperate	Manganese-stabilising protein / photosystem II polypeptide
PF01668	0.462898	0.5306	0	0.243951	0	0	temperate	SmpB protein
PF01663	0.0533221	0.255946	0.686669	0.175241	1.82458e-13	1.31452e-15	temperate	Type I phosphodiesterase / nucleotide pyrophosphatase
PF01645	0.200255	0.121784	0.677948	0.0188352	2.66745e-11	2.28369e-29	temperate	Conserved region in glutamate synthase
PF01642	0.195617	0.151059	0.650136	0.156434	3.69347e-12	4.19061e-28	temperate	Methylmalonyl-CoA mutase
PF01637	0.311857	0.671825	0.0101407	0.756706	2.88823e-15	6.12154e-26	temperate	ATPase domain predominantly from Archaea
PF01612	0.251145	0.222805	0.526023	0.0150192	4.00421e-09	1.46576e-24	temperate	3'-5' exonuclease
PF01603	0.113692	0.272378	0.613878	0.017255	3.554e-16	6.96121e-19	temperate	Protein phosphatase 2A regulatory B subunit (B56 family)
PF01602	0.236515	0.169642	0.593828	0.0358185	3.10204e-13	3.14732e-32	temperate	Adaptin N terminal region
PF01704	0.2244	0.154821	0.620767	0.0103486	1.35124e-14	8.00486e-32	temperate	UTP--glucose-1-phosphate uridylyltransferase
PF05493	0.399603	0.582056	0.0154719	0.392418	7.60471e-19	1.28511e-33	temperate	ATP synthase subunit H
PF01398	0.215829	0.224615	0.55915	0.901854	4.22147e-14	1.42123e-27	temperate	JAB1/Mov34/MPN/PAD-1 ubiquitin protease
PF01384	0.137466	0.156268	0.702897	0.981701	5.62568e-14	2.30423e-26	temperate	Phosphate transporter family
PF01182	0.580549	0.321732	0.0977086	0.00635845	8.09302e-13	2.80078e-06	temperate	Glucosamine-6-phosphate isomerases/6-phosphogluconolactonase
PF01180	0.204394	0.122911	0.669338	0.162915	0.000252906	1.3406e-13	temperate	Dihydroorotate dehydrogenase
PF01176	0.229359	0.770583	0	0.0718145	0	0	temperate	Translation initiation factor 1A / IF-1
PF01167	0.228242	0.243038	0.526627	0.819401	5.42967e-10	2.91543e-17	temperate	Tub family
PF01163	0.27272	0.147991	0.579107	0.0368521	1.10401e-05	2.99481e-24	temperate	RIO1 family
PF01148	0.0675012	0.25538	0.677094	0.00241988	1.00585e-14	1.61121e-15	temperate	Cytidylyltransferase family
PF01145	0.303756	0.156837	0.539407	0.00284793	5.6637e-06	6.78074e-26	temperate	SPFH domain / Band 7 family
PF01133	0.714387	0.242201	0.0419436	0.0921051	6.38849e-12	3.46582e-15	temperate	Enhancer of rudimentary
PF01129	0.135866	0.328509	0.535479	0.0757312	2.19962e-14	2.77932e-11	temperate	NAD:arginine ADP-ribosyltransferase
PF01111	0.315623	0.606725	0.0768696	0.197476	5.64915e-05	3.42232e-09	temperate	Cyclin-dependent kinase regulatory subunit
PF01094	0.477108	0.446201	0.0723107	0.454487	1.94539e-12	1.41735e-14	temperate	Receptor family ligand binding region
PF01088	0.220288	0.26664	0.510842	0.609016	1.30055e-07	9.11887e-10	temperate	Ubiquitin carboxyl-terminal hydrolase, family 1
PF01086	0.527342	0.36447	0.107797	0.0601433	1.57724e-09	0.000675305	temperate	Clathrin light chain
PF01078	0.236653	0.161141	0.602204	0.00207677	2.63367e-06	7.91501e-20	temperate	Magnesium chelatase, subunit ChlI
PF01077	0.300889	0.152348	0.546762	0.00109532	0.000472202	1.6646e-21	temperate	Nitrite and sulphite reductase 4Fe-4S domain
PF01074	0.192313	0.136296	0.670068	0.349589	8.85894e-12	2.19876e-29	temperate	Glycosyl hydrolases family 38 N-terminal domain
PF01070	0.183121	0.120145	0.69663	0.0216464	6.66493e-12	3.4847e-28	temperate	FMN-dependent dehydrogenase
PF01186	0.147075	0.401372	0.450384	0.318657	7.60765e-06	0.000553389	temperate	Lysyl oxidase
PF01210	0.173692	0.331668	0.494608	0.0536111	3.0869e-11	2.85495e-06	temperate	NAD-dependent glycerol-3-phosphate dehydrogenase N-terminus
PF01213	0.143181	0.216102	0.635699	0.855217	3.33637e-11	8.13515e-18	temperate	Adenylate cyclase associated (CAP) N terminal
PF01215	0.524688	0.451242	0.0233779	0.192273	5.02301e-16	3.61987e-21	temperate	Cytochrome c oxidase subunit Vb
PF01381	0.672886	0.264106	0.0630054	0.00134006	3.30888e-10	3.10705e-06	temperate	Helix-turn-helix
PF01363	0.0902442	0.0857723	0.823643	0.239285	2.32683e-16	6.38429e-34	temperate	FYVE zinc finger
PF01343	0.199052	0.0958443	0.705102	0.00130901	1.65178e-08	4.09612e-30	temperate	Peptidase family S49
PF01336	0.308258	0.235842	0.455873	0.0329764	4.00994e-05	2.6921e-16	temperate	OB-fold nucleic acid binding domain
PF01333	0.145061	0.18938	0.665559	0.00119128	5.12054e-12	5.18535e-21	temperate	Apocytochrome F, C-terminal
PF01326	0.310712	0.112982	0.5763	0.0016957	3.02487e-06	2.32849e-28	temperate	Pyruvate phosphate dikinase, AMP/ATP-binding domain
PF01323	0.701969	0.212983	0.0850331	0.00288393	1.5308e-08	7.99125e-06	temperate	DSBA-like thioredoxin domain
PF01321	0.120731	0.268887	0.609971	0.0183631	1.44163e-10	5.54504e-10	temperate	Creatinase/Prolidase N-terminal domain
PF01386	0.315902	0.640897	0.0370565	0.612637	7.23887e-12	5.45499e-24	temperate	Ribosomal L25p family
PF01293	0.0717982	0.0600104	0.868177	0.0302299	1.05729e-16	3.81642e-34	temperate	Phosphoenolpyruvate carboxykinase
PF01262	0.140876	0.172317	0.686427	0.445758	2.08923e-16	1.36493e-32	temperate	Alanine dehydrogenase/PNT, C-terminal domain
PF01257	0.582397	0.298774	0.118821	0.00151874	5.66548e-10	4.40616e-05	temperate	Thioredoxin-like [2Fe-2S] ferredoxin
PF01253	0.213648	0.302181	0.47207	0.524752	2.72443e-05	9.71195e-05	temperate	Translation initiation factor SUI1
PF01242	0.32825	0.666027	0	0.256283	0	0	temperate	6-pyruvoyl tetrahydropterin synthase
PF01229	0.403818	0.591043	0	0.223945	0	0	temperate	Glycosyl hydrolases family 39
PF01226	0.137073	0.274418	0.588178	0.242674	1.18212e-10	5.309e-10	temperate	Formate/nitrite transporter
PF01221	0.428509	0.415349	0.155524	0.0384732	2.88583e-08	3.07171e-06	temperate	Dynein light chain type 1
PF01218	0.0944513	0.0858421	0.819253	0.629699	1.88969e-13	7.88034e-27	temperate	Coproporphyrinogen III oxidase
PF01268	0.175085	0.0921769	0.732512	0.0351823	3.57433e-13	1.58495e-33	temperate	Formate--tetrahydrofolate ligase
PF01068	0.159807	0.25285	0.583001	0.529844	2.30736e-11	3.39676e-13	temperate	ATP dependent DNA ligase domain
PF01841	0.221906	0.2367	0.539657	0.632016	2.5883e-08	1.19299e-13	temperate	Transglutaminase-like superfamily
PF01851	0.140716	0.115151	0.743967	0.100704	6.51949e-15	7.17258e-32	temperate	Proteasome/cyclosome repeat
PF02507	0.621673	0.14195	0.236376	0.00172399	8.23908e-06	8.01514e-16	temperate	Photosystem I reaction centre subunit III / PsaF
PF02493	0.287542	0.212292	0.50015	0.0177024	1.03133e-10	3.70571e-23	temperate	MORN repeat
PF02492	0.266309	0.302166	0.431144	0.948187	5.83177e-08	3.00845e-09	temperate	CobW/HypB/UreG, nucleotide-binding domain
PF02485	0.210435	0.267974	0.511048	0.609546	9.82665e-07	2.79858e-09	temperate	Core-2/I-Branching enzyme
PF02475	0.147291	0.2423	0.609709	0.0351823	5.41645e-07	1.94213e-05	temperate	Met-10+ like-protein
PF02466	0.381749	0.408259	0.2078	0.964342	0.000133284	0.000521768	temperate	Tim17/Tim22/Tim23/Pmp24 family
PF02460	0.292166	0.207119	0.50066	0.0300598	0.000125973	1.77309e-18	temperate	Patched family
PF02436	0.246883	0.219208	0.533748	0.427252	8.5085e-13	4.00558e-22	temperate	Conserved carboxylase domain
PF02434	0.11249	0.238207	0.645972	0.443201	5.41287e-12	1.42029e-14	temperate	Fringe-like
PF02427	0.154736	0.82752	0.0177112	0.0246966	6.01053e-14	1.30637e-16	temperate	Photosystem I reaction centre subunit IV / PsaE
PF02419	0.236662	0.573633	0.189703	0.0401064	1.26704e-09	6.60307e-15	temperate	PsbL protein
PF02416	0.450417	0.547271	0	0.796611	0	0	temperate	mttA/Hcf106 family
PF02403	0.282646	0.178689	0.538629	0.0107133	1.47964e-07	8.99866e-25	temperate	Seryl-tRNA synthetase N-terminal domain
PF02391	0.486849	0.479022	0	0.726718	0	0	temperate	MoaE protein
PF02390	0.74908	0.183035	0.0678152	0.00554983	9.26877e-07	4.94472e-05	temperate	Putative methyltransferase
PF02373	0.19222	0.178165	0.629069	0.17025	1.89165e-12	1.17514e-27	temperate	JmjC domain, hydroxylase
PF02364	0.105327	0.0725078	0.82213	0.0346609	1.46744e-16	2.0485e-35	temperate	1,3-beta-glucan synthase component
PF02516	0.296796	0.160346	0.542856	0.00195746	7.71367e-07	1.46355e-27	temperate	Oligosaccharyl transferase STT3, N-terminal
PF02531	0.328275	0.191861	0.479838	0.0294771	3.83126e-07	4.57083e-20	temperate	PsaD
PF02533	0.814339	0.185526	0	0.111538	0	0	temperate	Photosystem II 4 kDa reaction centre component
PF02540	0.157705	0.267071	0.573021	0.207129	7.32546e-09	6.02495e-10	temperate	NAD synthase
PF02747	0.205683	0.712925	0.0811277	0.444343	8.37055e-06	1.13239e-10	temperate	Proliferating cell nuclear antigen, C-terminal domain
PF02729	0.221612	0.203445	0.573274	0.625041	6.50307e-07	4.97694e-15	temperate	Aspartate/ornithine carbamoyltransferase, carbamoyl-P binding domain
PF02690	0.095003	0.163972	0.740999	0.00875591	1.50225e-14	3.02701e-23	temperate	Na+/Pi-cotransporter
PF02671	0.227415	0.137143	0.6354	0.0103619	2.45654e-11	4.13212e-30	temperate	Paired amphipathic helix repeat
PF02670	0.274934	0.157007	0.56776	0.0699546	5.43178e-06	1.8149e-21	temperate	1-deoxy-D-xylulose 5-phosphate reductoisomerase
PF02668	0.184923	0.146994	0.66798	0.116618	1.73523e-11	2.80044e-25	temperate	Taurine catabolism dioxygenase TauD, TfdA family
PF02659	0.263956	0.7179	0.0177549	0.0174277	1.36894e-18	1.29047e-18	temperate	Putative manganese efflux pump
PF02628	0.242903	0.163231	0.589046	0.330746	1.77664e-06	6.68605e-19	temperate	Cytochrome oxidase assembly protein
PF02358	0.255288	0.181162	0.563539	0.00752523	1.51666e-12	8.9884e-29	temperate	Trehalose-phosphatase
PF02627	0.254327	0.0689814	0.676663	0.00518617	1.371e-09	8.4762e-34	temperate	Carboxymuconolactone decarboxylase family
PF02615	0.301814	0.126767	0.571417	0.00103236	1.71945e-07	1.72051e-29	temperate	Malate/L-lactate dehydrogenase
PF02607	0.111375	0.219362	0.668921	0.257665	6.84696e-14	6.49655e-18	temperate	B12 binding domain
PF02605	0.387797	0.345243	0.266949	0.0208299	8.33131e-05	5.46202e-18	temperate	Photosystem I reaction centre subunit XI
PF02575	0.315986	0.528854	0.153903	0.200597	0.000314372	1.96551e-11	temperate	YbaB/EbfC DNA-binding family
PF02574	0.111375	0.219362	0.668921	0.257665	6.84696e-14	6.49655e-18	temperate	Homocysteine S-methyltransferase
PF02566	0.408271	0.459816	0.128177	0.565755	3.53176e-08	9.93048e-05	temperate	OsmC-like protein
PF02545	0.54743	0.431168	0.0137584	0.81215	3.25374e-13	9.44992e-27	temperate	Maf-like protein
PF02542	0.493215	0.351593	0.150521	0.416978	0.000268376	0.000151782	temperate	YgbB family
PF02617	0.436169	0.495228	0.0674958	0.400264	5.31084e-10	1.47741e-09	temperate	ATP-dependent Clp protease adaptor protein ClpS
PF01844	0.64742	0.352185	0	0.0190752	0	0	temperate	HNH endonuclease
PF02357	0.476701	0.435703	0.0842668	0.184613	4.35904e-09	3.75447e-08	temperate	Transcription termination factor nusG
PF02310	0.116553	0.215206	0.667861	0.304311	9.29834e-15	3.06063e-20	temperate	B12 binding domain
PF02055	0.192815	0.307944	0.497412	0.174183	8.15777e-07	1.42825e-06	temperate	Glycosyl hydrolase family 30 TIM-barrel domain
PF02020	0.219697	0.227694	0.551941	0.592823	1.91678e-11	2.72335e-18	temperate	eIF4-gamma/eIF5/eIF2-epsilon
PF02018	0.146427	0.0614812	0.791986	0.007765	1.52738e-11	2.1443e-30	temperate	Carbohydrate binding domain
PF01991	0.320561	0.526466	0.150646	0.466427	5.50058e-06	2.80019e-06	temperate	ATP synthase (E/31 kDa) subunit
PF01990	0.445694	0.425405	0.121902	0.917446	0.000141272	7.41263e-11	temperate	ATP synthase (F/14-kDa) subunit
PF01984	0.631419	0.271196	0.09737	0.00257501	7.34974e-10	5.3419e-07	temperate	Double-stranded DNA-binding domain
PF01965	0.38979	0.450224	0.159253	0.510108	4.0719e-08	5.537e-15	temperate	DJ-1/PfpI family
PF01963	0.542731	0.256981	0.181524	0.707793	0.000987444	1.74242e-06	temperate	TraB/PrgY/gumN family
PF01960	0.254335	0.205036	0.540196	0.0589048	1.40796e-05	1.17741e-21	temperate	ArgJ family
PF01956	0.370345	0.514646	0.110505	0.829407	3.14131e-08	1.06085e-11	temperate	Integral membrane protein EMC3/TMCO1-like
PF01925	0.110101	0.101888	0.787962	0.0489154	2.04149e-15	2.45929e-31	temperate	Sulfite exporter TauE/SafE
PF01920	0.366561	0.497491	0.134563	0.515439	1.80427e-08	7.86627e-10	temperate	Prefoldin subunit
PF01915	0.246266	0.184607	0.569125	0.007765	1.66693e-10	1.10541e-24	temperate	Glycosyl hydrolase family 3 C-terminal domain
PF01912	0.224857	0.255337	0.516097	0.709852	2.85962e-07	1.58402e-11	temperate	eIF-6 family
PF01880	0.229315	0.760686	0.00963456	0.120895	1.77358e-16	8.68773e-25	temperate	Desulfoferrodoxin
PF01853	0.344386	0.215016	0.438093	0.563773	4.58029e-07	5.58153e-14	temperate	MOZ/SAS family
PF01852	0.17457	0.0982176	0.727193	0.00620204	0.000481324	5.7052e-19	temperate	START domain
PF02077	0.217846	0.32308	0.458141	0.582729	2.7046e-08	9.19219e-10	temperate	SURF4 family
PF02104	0.268285	0.625881	0.0902305	0.589334	2.29175e-06	4.03179e-13	temperate	SURF1 family
PF02136	0.49574	0.452941	0.0502869	0.358177	5.52433e-12	3.5222e-13	temperate	Nuclear transport factor 2 (NTF2) domain
PF02140	0.175252	0.237728	0.583251	0.817076	2.69416e-13	7.24887e-18	temperate	Galactose binding lectin domain
PF02308	0.215388	0.247696	0.525449	0.596248	5.43473e-06	4.55491e-10	temperate	MgtC family
PF02298	0.0475097	0.0409856	0.911498	0.033554	2.36536e-16	2.39551e-34	temperate	Plastocyanin-like domain
PF02296	0.138731	0.189449	0.667124	0.695148	3.91761e-15	1.33789e-24	temperate	Alpha adaptin AP2, C-terminal domain
PF02290	0.578316	0.384446	0.0346653	0.322754	6.2744e-16	1.11171e-19	temperate	Signal recognition particle 14kD protein
PF02263	0.148666	0.0638823	0.787449	0.00123982	9.24165e-15	4.5842e-34	temperate	Guanylate-binding protein, N-terminal domain
PF02260	0.0763211	0.223201	0.700344	0.0202413	3.52745e-16	1.59872e-27	temperate	FATC domain
PF02259	0.0763211	0.223201	0.700344	0.0202413	3.52745e-16	1.59872e-27	temperate	FAT domain
PF02254	0.253924	0.117887	0.628183	0.0016009	2.20402e-09	1.59528e-30	temperate	TrkA-N domain
PF02347	0.115495	0.10848	0.7756	0.388152	4.43201e-16	3.73468e-33	temperate	Glycine cleavage system P-protein
PF02233	0.129476	0.18702	0.682551	0.995956	1.82446e-16	1.1383e-31	temperate	NAD(P) transhydrogenase beta subunit
PF02222	0.337547	0.108902	0.553537	0.00164065	0.00034234	1.0637e-26	temperate	ATP-grasp domain
PF02221	0.293927	0.418592	0.277506	0.814793	0.000718637	0.000131591	temperate	ML domain
PF02205	0.0681439	0.113606	0.817596	0.0896983	6.85324e-16	4.95856e-31	temperate	WH2 motif
PF02201	0.0295307	0.618465	0.351378	0.584236	2.31981e-15	4.86385e-14	temperate	SWIB/MDM2 domain
PF02184	0.209972	0.200634	0.5828	0.804896	7.10532e-09	1.53868e-18	temperate	HAT (Half-A-TPR) repeat
PF02157	0.214669	0.383475	0.396141	0.897157	2.34504e-05	1.00746e-09	temperate	Mannose-6-phosphate receptor
PF02146	0.168031	0.166115	0.665511	0.0310115	8.18197e-13	2.376e-25	temperate	Sir2 family
PF02141	0.279584	0.0861345	0.633424	0.0404963	1.12435e-09	2.24824e-30	temperate	DENN (AEX-3) domain
PF02225	0.288507	0.25605	0.455046	0.150987	0.000376931	3.11903e-10	temperate	PA domain
PF01063	0.246596	0.186028	0.567281	0.0517043	2.67597e-07	8.22325e-20	temperate	Amino-transferase class IV
PF01062	0.271587	0.224458	0.503928	0.111623	1.69966e-09	4.01057e-20	temperate	Bestrophin, RFP-TM, chloride channel
PF01061	0.189304	0.372775	0.437833	0.0462645	2.05958e-10	0.000247701	temperate	ABC-2 type transporter
PF00352	0.274372	0.609303	0.116286	0.0631067	5.31719e-06	4.78563e-09	temperate	Transcription factor TFIID (or TATA-binding protein, TBP)
PF00346	0.188451	0.100258	0.711289	0.00128409	8.14281e-11	3.95039e-31	temperate	Respiratory-chain NADH dehydrogenase, 49 Kd subunit
PF00344	0.121817	0.336575	0.541606	0.00174108	7.75438e-15	3.11907e-09	temperate	SecY
PF00331	0.129453	0.290063	0.578505	0.237884	5.41287e-12	1.76312e-13	temperate	Glycosyl hydrolase family 10
PF00324	0.118808	0.236899	0.644284	0.00243136	2.26835e-14	6.3227e-23	temperate	Amino acid permease
PF00319	0.362783	0.494991	0.138564	0.771963	5.04526e-07	1.46164e-06	temperate	SRF-type transcription factor (DNA-binding and dimerisation domain)
PF00317	0.220659	0.270555	0.50797	0.695148	1.55601e-08	2.22059e-11	temperate	Ribonucleotide reductase, all-alpha domain
PF00316	0.249525	0.177483	0.57298	0.0203315	2.22293e-08	1.88514e-23	temperate	Fructose-1-6-bisphosphatase, N-terminal domain
PF00313	0.513002	0.3869	0.10004	0.249836	1.10331e-12	8.302e-09	temperate	'Cold-shock' DNA-binding domain
PF00310	0.200945	0.121436	0.677611	0.0118235	1.30579e-11	5.79073e-30	temperate	Glutamine amidotransferases class-II
PF00306	0.264589	0.225921	0.50949	0.00371308	2.42395e-11	9.40077e-22	temperate	ATP synthase alpha/beta chain, C terminal domain
PF00305	0.323932	0.176782	0.499142	0.0851503	2.27354e-05	3.57338e-20	temperate	Lipoxygenase
PF00303	0.172987	0.204002	0.621435	0.281641	2.55396e-11	2.15504e-21	temperate	Thymidylate synthase
PF00283	0.285472	0.535444	0.179085	0.00380942	2.29797e-07	5.6391e-15	temperate	Cytochrome b559, alpha (gene psbE) and beta (gene psbF)subunits
PF00278	0.161946	0.162448	0.673743	0.892136	2.66745e-11	7.84714e-24	temperate	Pyridoxal-dependent decarboxylase, C-terminal sheet domain
PF00274	0.324049	0.19074	0.48521	0.00233166	0.000126514	9.17986e-21	temperate	Fructose-bisphosphate aldolase class-I
PF00254	0.467645	0.340306	0.192046	0.0233019	8.35739e-11	0.000337109	temperate	FKBP-type peptidyl-prolyl cis-trans isomerase
PF00361	0.166434	0.599944	0.233594	0.0458879	7.68968e-06	6.73096e-12	temperate	Proton-conducting membrane transporter
PF00364	0.245983	0.177626	0.57638	0.0380924	3.06411e-11	1.2791e-27	temperate	Biotin-requiring enzyme
PF00370	0.235473	0.273303	0.468522	0.980049	0.000130968	3.01854e-08	temperate	FGGY family of carbohydrate kinases, N-terminal domain
PF00383	0.684626	0.315099	0	0.0118125	0	0	temperate	Cytidine and deoxycytidylate deaminase zinc-binding region
PF00499	0.0649625	0.833345	0.100368	0.861302	1.818e-06	3.41919e-11	temperate	NADH-ubiquinone/plastoquinone oxidoreductase chain 6
PF00490	0.077794	0.117205	0.80407	0.645529	5.95199e-13	1.03933e-20	temperate	Delta-aminolevulinic acid dehydratase
PF00484	0.529091	0.451938	0	0.41474	0	0	temperate	Carbonic anhydrase
PF00479	0.165499	0.225752	0.607674	0.966419	2.20162e-13	1.6215e-22	temperate	Glucose-6-phosphate dehydrogenase, NAD binding domain
PF00475	0.0744627	0.0854474	0.838361	0.967678	4.03183e-17	2.18732e-35	temperate	Imidazoleglycerol-phosphate dehydratase
PF00474	0.112441	0.313997	0.573535	0.0625961	3.63732e-14	7.89169e-10	temperate	Sodium:solute symporter family
PF00465	0.0871486	0.0534729	0.859272	0.0347766	1.91771e-08	2.62875e-24	temperate	Iron-containing alcohol dehydrogenase
PF00462	0.463955	0.398641	0.137264	0.249836	8.65387e-13	7.38241e-10	temperate	Glutaredoxin
PF00248	0.10963	0.0885056	0.801862	0.0284195	3.82264e-09	1.40895e-22	temperate	Aldo/keto reductase family
PF00458	0.169449	0.177536	0.651559	0.800605	2.56519e-15	7.53747e-30	temperate	WHEP-TRS domain
PF00445	0.711537	0.288388	0	0.00747065	0	0	temperate	Ribonuclease T2 family
PF00433	0.143435	0.297759	0.558764	0.0150969	3.31153e-13	6.79804e-12	temperate	Protein kinase C terminal domain
PF00431	0.0929886	0.431648	0.475171	0.0571083	1.86595e-12	1.85096e-11	temperate	CUB domain
PF00430	0.0616301	0.538349	0.399889	0.566615	1.13374e-13	3.38175e-16	temperate	ATP synthase B/B' CF(0)
PF00425	0.190591	0.130553	0.677675	0.228424	1.48237e-11	1.62931e-27	temperate	chorismate binding enzyme
PF00401	0.136086	0.258617	0.605249	0.104102	2.21526e-11	1.06164e-16	temperate	ATP synthase, Delta/Epsilon chain, long alpha-helix domain
PF00398	0.622371	0.237351	0.139978	0.0154776	1.2366e-07	1.36324e-06	temperate	Ribosomal RNA adenine dimethylase
PF00393	0.224646	0.175735	0.599557	0.0187648	3.13061e-12	4.38505e-24	temperate	6-phosphogluconate dehydrogenase, C-terminal domain
PF00449	0.177825	0.111036	0.709633	0.275181	7.48799e-10	6.05861e-28	temperate	Urease alpha-subunit, N-terminal domain
PF00501	0.253264	0.175195	0.57154	0.005259	2.29077e-12	8.04493e-30	temperate	AMP-binding enzyme
PF00244	0.243984	0.329761	0.426028	0.405052	3.36999e-05	0.000290539	temperate	14-3-3 protein
PF00213	0.0900722	0.347748	0.562001	0.582729	2.51779e-14	6.89246e-18	temperate	ATP synthase delta (OSCP) subunit
PF00080	0.173949	0.243279	0.581869	0.313683	3.56441e-10	4.2254e-24	temperate	Copper/zinc superoxide dismutase (SODC)
PF00063	0.238186	0.16592	0.595894	0.00170494	1.55141e-13	4.99077e-29	temperate	Myosin head (motor domain)
PF00054	0.172276	0.164082	0.655707	0.535768	7.92094e-10	1.29423e-20	temperate	Laminin G domain
PF00051	0.0620713	0.718248	0.219493	0.787926	4.26109e-13	1.24489e-19	temperate	Kringle domain
PF00050	0.417091	0.538495	0.044222	0.454587	3.28465e-13	5.74528e-10	temperate	Kazal-type serine protease inhibitor domain
PF00044	0.130044	0.378448	0.491505	0.0136584	2.01067e-14	0.000148185	temperate	Glyceraldehyde 3-phosphate dehydrogenase, NAD binding domain
PF00041	0.262455	0.259427	0.477811	0.341431	7.24391e-08	8.21139e-12	temperate	Fibronectin type III domain
PF00037	0.278454	0.327033	0.394478	0.0363463	1.62393e-07	1.5283e-15	temperate	4Fe-4S binding domain
PF00034	0.495062	0.492135	0.0116774	0.479535	1.65952e-20	2.02644e-26	temperate	Cytochrome c
PF00032	0.030176	0.788766	0.181056	0.0150969	2.25683e-14	0.000298471	temperate	Cytochrome b(C-terminal)/b6/petD
PF00030	0.0233853	0.0613614	0.915237	0.0155135	7.48257e-17	2.44689e-33	temperate	Beta/Gamma crystallin
PF00026	0.30609	0.290016	0.403871	0.157045	0.000687561	4.83288e-08	temperate	Eukaryotic aspartyl protease
PF00025	0.237989	0.219731	0.542185	0.442722	1.09557e-10	1.23472e-21	temperate	ADP-ribosylation factor family
PF00024	0.292502	0.285249	0.422138	0.502056	4.56306e-05	4.58568e-08	temperate	PAN domain
PF00011	0.3228	0.567352	0.109816	0.490664	3.14463e-06	2.80395e-13	temperate	Hsp20/alpha crystallin family
PF00008	0.0499681	0.0834438	0.865624	0.890028	3.40658e-17	1.55611e-34	temperate	EGF-like domain
PF00006	0.262661	0.226898	0.51044	0.00416525	2.24907e-11	1.22719e-21	temperate	ATP synthase alpha/beta family, nucleotide-binding domain
PF00085	0.316991	0.492292	0.190715	0.0474523	1.39781e-05	1.96877e-12	temperate	Thioredoxin
PF00086	0.110793	0.105385	0.783811	0.00816027	3.19249e-15	3.16929e-30	temperate	Thyroglobulin type-1 repeat
PF00101	0.0578201	0.277464	0.664715	0.0279598	9.24165e-15	7.22295e-18	temperate	Ribulose bisphosphate carboxylase, small chain
PF00107	0.528698	0.370377	0.100918	0.0134314	2.5805e-14	5.92728e-14	temperate	Zinc-binding dehydrogenase
PF00202	0.284504	0.216869	0.498564	0.0951305	1.95728e-06	2.49363e-19	temperate	Aminotransferase class-III
PF00194	0.0792995	0.0926546	0.827771	0.317435	5.3015e-16	4.7928e-32	temperate	Eukaryotic-type carbonic anhydrase
PF00193	0.00120992	0.597944	0.40074	0.005845	1.28916e-14	8.00787e-14	temperate	Extracellular link domain
PF00186	0.172987	0.204002	0.621435	0.281641	2.55396e-11	2.15504e-21	temperate	Dihydrofolate reductase
PF00185	0.221612	0.203445	0.573274	0.625041	6.50307e-07	4.97694e-15	temperate	Aspartate/ornithine carbamoyltransferase, Asp/Orn binding domain
PF00160	0.312292	0.519179	0.168515	0.18117	4.98649e-05	8.78677e-10	temperate	Cyclophilin type peptidyl-prolyl cis-trans isomerase/CLD
PF00156	0.26385	0.211263	0.524766	0.0796817	1.19626e-08	1.09228e-21	temperate	Phosphoribosyl transferase domain
PF00152	0.23085	0.211581	0.557077	0.425647	3.44708e-12	6.96137e-24	temperate	tRNA synthetases class II (D, K and N)
PF00216	0.684533	0.304836	0.0106039	0.0064725	7.18182e-25	4.30417e-26	temperate	Bacterial DNA-binding protein
PF00150	0.274269	0.293659	0.43096	0.491884	9.38617e-05	8.92304e-08	temperate	Cellulase (glycosyl hydrolase family 5)
PF00137	0.129092	0.514919	0.35591	0.45132	1.46536e-11	3.45272e-09	temperate	ATP synthase subunit C
PF00136	0.243502	0.284205	0.470671	0.481409	0.000188061	4.76341e-09	temperate	DNA polymerase family B
PF00128	0.110793	0.105385	0.783811	0.00816027	3.19249e-15	3.16929e-30	temperate	Alpha amylase, catalytic domain
PF00124	0.0815637	0.391041	0.527395	0.00445542	2.08275e-13	6.17616e-17	temperate	Photosynthetic reaction centre protein
PF00121	0.196962	0.296434	0.506487	0.235499	7.98907e-13	1.18912e-10	temperate	Triosephosphate isomerase
PF00120	0.194037	0.187374	0.61789	0.982945	4.54549e-11	2.22406e-21	temperate	Glutamine synthetase, catalytic domain
PF00119	0.0748605	0.339285	0.585806	0.271914	2.38773e-15	1.11014e-18	temperate	ATP synthase A chain
PF00111	0.5677	0.366804	0.0654932	0.00166619	3.77646e-17	5.82972e-12	temperate	2Fe-2S iron-sulfur cluster binding domain
PF00146	0.139605	0.702025	0.157511	0.709821	0.000416935	8.72128e-06	temperate	NADH dehydrogenase
PF00505	0.413877	0.496029	0.089855	0.792625	2.44533e-14	5.12952e-12	temperate	HMG (high mobility group) box
PF00507	0.253741	0.610748	0.135405	0.0610833	0.00066597	2.48158e-12	temperate	NADH-ubiquinone/plastoquinone oxidoreductase, chain 3
PF00510	0.0443715	0.770678	0.184726	0.473381	6.55476e-12	1.76233e-08	temperate	Cytochrome c oxidase subunit III
PF00928	0.218471	0.278114	0.502746	0.483622	7.8917e-12	1.2694e-10	temperate	Adaptor complexes medium subunit family
PF00925	0.245345	0.243973	0.510566	0.067486	1.91186e-05	2.96808e-13	temperate	GTP cyclohydrolase II
PF00923	0.259974	0.185679	0.546069	0.925318	0.000249549	6.52174e-13	temperate	Transaldolase/Fructose-6-phosphate aldolase
PF00917	0.267216	0.203525	0.529184	0.0507851	6.32227e-08	2.22743e-20	temperate	MATH domain
PF00909	0.103143	0.261509	0.635344	0.0150969	1.62447e-15	7.68783e-16	temperate	Ammonium Transporter Family
PF00893	0.408524	0.50493	0.0763205	0.723371	1.49199e-05	2.48158e-12	temperate	Small Multidrug Resistance protein
PF00890	0.0919632	0.136353	0.771315	0.222227	7.6951e-17	3.5567e-32	temperate	FAD binding domain
PF00875	0.315275	0.176666	0.508057	0.00101168	7.16791e-05	5.09511e-21	temperate	DNA photolyase
PF00852	0.396564	0.482253	0.104956	0.542777	3.20128e-05	3.26518e-05	temperate	Glycosyltransferase family 10 (fucosyltransferase) C-term
PF00849	0.574548	0.355392	0.0696115	0.055228	1.63e-11	1.71354e-13	temperate	RNA pseudouridylate synthase
PF00831	0.343591	0.631318	0.0250795	0.0562648	1.67257e-11	3.55293e-22	temperate	Ribosomal L29 protein
PF00830	0.438641	0.49984	0.0598104	0.785082	7.80593e-13	5.29186e-11	temperate	Ribosomal L28 family
PF00809	0.13185	0.224496	0.643201	0.365731	1.21902e-12	4.77916e-17	temperate	Pterin binding enzyme
PF00806	0.103351	0.0807112	0.815835	0.0520023	8.15496e-16	1.15865e-33	temperate	Pumilio-family RNA binding repeat
PF00805	0.48307	0.399818	0.117101	0.0126207	1.14634e-14	1.20763e-05	temperate	Pentapeptide repeats (8 copies)
PF00797	0.303369	0.631007	0.064939	0.0254667	0.00013302	8.28421e-19	temperate	N-acetyltransferase
PF00793	0.282423	0.148467	0.568431	0.104796	2.99101e-05	6.12972e-16	temperate	DAHP synthetase I family
PF00931	0.148991	0.262225	0.585276	0.192273	7.50908e-08	1.62737e-09	temperate	NB-ARC domain
PF00933	0.219415	0.20895	0.570287	0.902852	2.61305e-09	5.30582e-20	temperate	Glycosyl hydrolase family 3 N terminal domain
PF00958	0.157705	0.267071	0.573021	0.207129	7.32546e-09	6.02495e-10	temperate	GMP synthase C terminal domain
PF00975	0.139926	0.0742086	0.785598	0.113787	3.01602e-13	1.16968e-33	temperate	Thioesterase domain
PF01055	0.329283	0.182389	0.48826	0.0412236	1.25144e-06	1.33484e-22	temperate	Glycosyl hydrolases family 31 TIM-barrel domain
PF01053	0.25171	0.234629	0.513605	0.0993037	4.82381e-10	1.34359e-27	temperate	Cys/Met metabolism PLP-dependent enzyme
PF01050	0.603503	0.351249	0.0348727	0.943202	4.35327e-08	8.66293e-17	temperate	Mannose-6-phosphate isomerase
PF01048	0.454474	0.398014	0.124471	0.990268	9.54975e-10	3.04041e-15	temperate	Phosphorylase superfamily
PF01042	0.332628	0.541963	0.123002	0.881524	2.24023e-06	1.02849e-08	temperate	Endoribonuclease L-PSP
PF01041	0.298591	0.20067	0.500736	0.00166529	0.000192321	2.22428e-20	temperate	DegT/DnrJ/EryC1/StrS aminotransferase family
PF01040	0.193454	0.240769	0.564435	0.659746	5.43019e-11	1.71562e-16	temperate	UbiA prenyltransferase family
PF01028	0.147609	0.159928	0.688343	0.51726	1.94539e-12	1.51773e-23	temperate	Eukaryotic DNA topoisomerase I, catalytic core
PF00789	0.279837	0.195993	0.52415	0.00752912	8.14145e-07	5.52782e-21	temperate	UBX domain
PF01027	0.201085	0.28865	0.50916	0.733209	7.29405e-14	2.36086e-13	temperate	Inhibitor of apoptosis-promoting Bax1
PF01012	0.219034	0.33544	0.445187	0.153983	1.29667e-05	0.000975357	temperate	Electron transfer flavoprotein domain
PF01008	0.229176	0.157233	0.613157	0.119259	5.43019e-11	2.17804e-30	temperate	Initiation factor 2 subunit family
PF00996	0.259261	0.181749	0.55887	0.05711	1.46779e-10	2.16562e-27	temperate	GDP dissociation inhibitor
PF00994	0.201667	0.107281	0.690887	0.0187144	3.13803e-08	4.3735e-25	temperate	Probable molybdopterin binding domain
PF00989	0.175686	0.126579	0.697706	0.0134156	6.14398e-14	8.02412e-31	temperate	PAS fold
PF00984	0.265545	0.216189	0.518207	0.0440861	6.11708e-10	4.17863e-18	temperate	UDP-glucose/GDP-mannose dehydrogenase family, central domain
PF00982	0.277822	0.180328	0.541847	0.00168373	1.67832e-10	2.74342e-27	temperate	Glycosyltransferase family 20
PF00977	0.181327	0.109854	0.708808	0.00285963	1.36187e-13	1.90989e-32	temperate	Histidine biosynthesis protein
PF01016	0.601269	0.367496	0.0306297	0.138511	2.83435e-10	5.64213e-11	temperate	Ribosomal L27 protein
PF00788	0.108002	0.0784403	0.813212	0.0394127	2.33256e-13	3.32712e-30	temperate	Ras association (RalGDS/AF-6) domain
PF00781	0.219543	0.277723	0.495788	0.888958	2.0387e-07	5.27765e-11	temperate	Diacylglycerol kinase catalytic domain
PF00773	0.136026	0.31611	0.547341	0.0842301	4.54709e-13	4.38366e-12	temperate	RNB domain
PF00639	0.416805	0.47513	0.107526	0.614934	6.55476e-12	4.4931e-15	temperate	PPIC-type PPIASE domain
PF00635	0.122726	0.0926141	0.78454	0.0346545	3.73801e-16	1.82725e-34	temperate	MSP (Major sperm protein) domain
PF00630	0.0653282	0.155718	0.769589	0.817076	3.79283e-15	9.37476e-26	temperate	Filamin/ABP280 repeat
PF00626	0.234921	0.217519	0.547532	0.0349637	3.62424e-11	2.42469e-22	temperate	Gelsolin repeat
PF00622	0.302997	0.238357	0.45836	0.140672	9.01658e-06	3.19123e-13	temperate	SPRY domain
PF00609	0.15076	0.243096	0.603523	0.260244	1.01344e-11	2.07305e-17	temperate	Diacylglycerol kinase accessory domain
PF00595	0.255668	0.206943	0.537367	0.053211	9.4134e-11	6.76197e-24	temperate	PDZ domain
PF00588	0.563855	0.279633	0.156505	0.00148378	3.09461e-09	0.000258739	temperate	SpoU rRNA Methylase family
PF00644	0.221192	0.184717	0.593007	0.271914	3.85361e-07	2.28595e-17	temperate	Poly(ADP-ribose) polymerase catalytic domain
PF00586	0.262422	0.166197	0.571337	0.0141749	1.58637e-09	2.6754e-27	temperate	AIR synthase related protein, N-terminal domain
PF00566	0.2002	0.407878	0.389086	0.347849	0.000387108	0.000646273	temperate	Rab-GTPase-TBC domain
PF00562	0.391435	0.217128	0.391422	0.0250733	1.40796e-05	3.02103e-15	temperate	RNA polymerase Rpb2, domain 6
PF00557	0.298573	0.195952	0.50545	0.0319016	1.15152e-06	7.91755e-25	temperate	Metallopeptidase family M24
PF00547	0.177825	0.111036	0.709633	0.275181	7.48799e-10	6.05861e-28	temperate	Urease, gamma subunit
PF00538	0.36673	0.631667	0	0.397466	0	0	temperate	linker histone H1 and H5 family
PF00520	0.295138	0.231748	0.47311	0.024759	4.19266e-08	3.97892e-17	temperate	Ion transport protein
PF00514	0.194737	0.179567	0.625666	0.0611163	3.21196e-15	5.20795e-28	temperate	Armadillo/beta-catenin-like repeat
PF00512	0.192783	0.139745	0.667426	0.0230861	3.26906e-13	7.71899e-30	temperate	His Kinase A (phospho-acceptor) domain
PF00574	0.264604	0.26426	0.470954	0.425647	2.28619e-05	3.79422e-10	temperate	Clp protease
PF02754	0.133839	0.113763	0.751967	0.100704	5.95199e-13	1.22231e-27	temperate	Cysteine-rich domain
PF00650	0.214199	0.206714	0.576464	0.490632	2.62957e-10	6.24532e-21	temperate	CRAL/TRIO domain
PF00658	0.304933	0.185695	0.50937	0.0051141	8.2511e-05	1.29658e-19	temperate	Poly-adenylate binding protein, unique domain
PF00764	0.527957	0.312108	0.159865	0.014309	1.8825e-07	0.000906066	temperate	Arginosuccinate synthase N-terminal HUP domain
PF00745	0.240524	0.192313	0.56704	0.122952	3.65135e-11	1.08987e-23	temperate	Glutamyl-tRNAGlu reductase, dimerisation domain
PF00733	0.193085	0.245815	0.56037	0.5496	8.88819e-08	3.43552e-15	temperate	Asparagine synthase
PF00731	0.337547	0.108902	0.553537	0.00164065	0.00034234	1.0637e-26	temperate	AIR carboxylase
PF00728	0.358071	0.161186	0.479231	0.281641	0.000191438	9.19308e-19	temperate	Glycosyl hydrolase family 20, catalytic domain
PF00709	0.078807	0.167047	0.754139	0.00197247	9.76222e-17	9.31994e-29	temperate	Adenylosuccinate synthetase
PF00705	0.205683	0.712925	0.0811277	0.444343	8.37055e-06	1.13239e-10	temperate	Proliferating cell nuclear antigen, N-terminal domain
PF00701	0.2576	0.234949	0.507009	0.133907	5.41193e-06	5.45434e-14	temperate	Dihydrodipicolinate synthetase family
PF00652	0.210238	0.150945	0.638747	0.022625	2.11731e-08	9.89229e-23	temperate	Ricin-type beta-trefoil lectin domain
PF00699	0.177825	0.111036	0.709633	0.275181	7.48799e-10	6.05861e-28	temperate	Urease beta subunit
PF00697	0.234753	0.103391	0.661524	0.0177024	3.4673e-05	2.85942e-21	temperate	N-(5'phosphoribosyl)anthranilate (PRA) isomerase
PF00694	0.227602	0.143586	0.62879	0.00518617	6.98319e-08	4.65615e-25	temperate	Aconitase C-terminal domain
PF00692	0.332741	0.648122	0.0174234	0.331494	9.63896e-23	1.35161e-33	temperate	dUTPase
PF00690	0.246481	0.1827	0.570796	0.0536111	6.25765e-12	1.83345e-27	temperate	Cation transporter/ATPase, N-terminus
PF00689	0.226736	0.162311	0.61093	0.0273398	5.66458e-13	1.95995e-29	temperate	Cation transporting ATPase, C-terminus
PF00682	0.247452	0.20461	0.547774	0.276365	1.45198e-09	4.98907e-24	temperate	HMGL-like
PF00675	0.282153	0.19608	0.521767	0.0013284	8.87684e-11	1.56281e-27	temperate	Insulinase (Peptidase family M16)
PF00673	0.578306	0.369822	0.0518519	0.0150192	1.30264e-14	7.83983e-10	temperate	ribosomal L5P family C-terminus
PF00698	0.263386	0.151506	0.585107	0.00278013	2.29019e-06	1.93246e-25	temperate	Acyl transferase domain
PF02774	0.242709	0.328298	0.428445	0.617081	2.44749e-05	0.000152781	temperate	Semialdehyde dehydrogenase, dimerisation domain
PF15633	0.430853	0.532349	0.0304214	0.565819	2.36227e-06	2.00665e-16	temperate	HYD1 signature containing ADP-ribosyltransferase
PF04065	0.205629	0.291442	0.502415	0.148188	1.03765e-09	1.65215e-09	temperate	Not1 N-terminal domain, CCR4-Not complex component
PF03176	0.24956	0.151597	0.598806	0.0122803	3.61377e-09	9.7725e-27	temperate	MMPL family
PF04935	0.584248	0.332238	0.0815188	0.0704663	4.12186e-07	5.92765e-09	temperate	Surfeit locus protein 6
PF03177	0.296796	0.160346	0.542856	0.00195746	7.71367e-07	1.46355e-27	temperate	Non-repetitive/WGA-negative nucleoporin C-terminal
PF03179	0.484279	0.409858	0.105284	0.183354	1.83347e-08	5.05222e-06	temperate	Vacuolar (H+)-ATPase G subunit
PF03184	0.578316	0.384446	0.0346653	0.322754	6.2744e-16	1.11171e-19	temperate	DDE superfamily endonuclease
PF04193	0.759161	0.240421	0	0.022625	0	0	temperate	PQ loop repeat
PF03200	0.400941	0.198815	0.399192	0.486771	0.000411436	1.24856e-16	temperate	Glycosyl hydrolase family 63 C-terminal domain
PF03203	0.503802	0.495756	0	0.0245122	0	0	temperate	MerC mercury resistance protein
PF04212	0.0578138	0.048037	0.893798	0.102309	4.87476e-16	4.2846e-34	temperate	MIT (microtubule interacting and transport) domain
PF04921	0.615406	0.296671	0.0877968	0.00634042	3.48871e-12	3.31394e-11	temperate	XAP5, circadian clock regulator C-terminal domain
PF04939	0.428266	0.437197	0.126151	0.55089	1.96211e-07	9.17573e-10	temperate	Ribosome biogenesis regulatory protein (RRS1)
PF04900	0.521832	0.470976	0	0.451623	0	0	temperate	Fcf1
PF04874	0.583502	0.403731	0	0.423725	0	0	temperate	Mak16 protein C-terminal region
PF04227	0.169074	0.267144	0.559583	0.730177	6.73845e-09	1.37014e-11	temperate	Indigoidine synthase A like protein
PF04258	0.200178	0.313284	0.485768	0.21405	1.19626e-08	1.14505e-06	temperate	Signal peptide peptidase
PF04857	0.196195	0.139421	0.664149	0.112665	1.1035e-08	1.00701e-23	temperate	CAF1 family ribonuclease
PF03224	0.109575	0.107741	0.782182	0.434306	1.54905e-16	6.58653e-34	temperate	V-ATPase subunit H
PF03227	0.444682	0.554853	0	0.0294788	0	0	temperate	Gamma interferon inducible lysosomal thiol reductase (GILT)
PF04266	0.245167	0.271371	0.462074	0.886676	0.00025822	1.96158e-08	temperate	ASCH domain
PF03721	0.265545	0.216189	0.518207	0.0440861	6.11708e-10	4.17863e-18	temperate	UDP-glucose/GDP-mannose dehydrogenase family, NAD binding domain
PF04794	0.313077	0.578922	0.0872965	0.637047	2.39542e-05	1.33283e-11	temperate	YdjC-like protein
PF03720	0.265545	0.216189	0.518207	0.0440861	6.11708e-10	4.17863e-18	temperate	UDP-glucose/GDP-mannose dehydrogenase family, UDP binding domain
PF04898	0.200255	0.121784	0.677948	0.0188352	2.66745e-11	2.28369e-29	temperate	Glutamate synthase central domain
PF03248	0.356174	0.51472	0.127465	0.528842	1.49013e-06	1.23394e-06	temperate	Rer1 family
PF04950	0.240639	0.215438	0.542735	0.251042	5.32464e-07	3.46582e-15	temperate	40S ribosome biogenesis protein Tsr1 and BMS1 C-terminal
PF03770	0.332101	0.0659282	0.601875	0.0116827	4.02854e-10	7.25569e-32	temperate	Inositol polyphosphate kinase
PF04158	0.0545853	0.928879	0.0162306	0.458721	2.69076e-07	3.98289e-18	temperate	Sof1-like domain
PF03104	0.243502	0.284205	0.470671	0.481409	0.000188061	4.76341e-09	temperate	DNA polymerase family B, exonuclease domain
PF03105	0.248563	0.295641	0.4538	0.848606	6.7377e-08	1.2823e-08	temperate	SPX domain
PF05021	0.131107	0.0968116	0.770366	0.291747	3.59963e-14	1.84009e-31	temperate	NPL4 family
PF05018	0.286014	0.290586	0.423008	0.48919	1.47718e-06	4.57273e-11	temperate	CFA20 domain
PF03126	0.222704	0.235568	0.533108	0.888958	2.24202e-07	1.66391e-11	temperate	Plus-3 domain
PF03836	0.125497	0.174932	0.695988	0.781194	8.3789e-15	5.91643e-28	temperate	RasGAP C-terminus
PF03133	0.354148	0.242659	0.402184	0.528842	9.61261e-05	5.42495e-11	temperate	Tubulin-tyrosine ligase family
PF03134	0.568	0.330597	0.101395	0.00199962	5.74093e-13	0.000288964	temperate	TB2/DP1, HVA22 family
PF03828	0.0910872	0.10668	0.798197	0.512489	9.36441e-15	1.06687e-29	temperate	Cid1 family poly A polymerase
PF03171	0.205095	0.289314	0.50526	0.283443	8.28762e-15	5.87947e-12	temperate	2OG-Fe(II) oxygenase superfamily
PF03810	0.24112	0.189448	0.569416	0.0177024	1.43627e-12	8.70839e-28	temperate	Importin-beta N-terminal domain
PF03800	0.672833	0.312327	0.0139685	0.0279598	3.75158e-21	5.93201e-24	temperate	Nuf2 family
PF03531	0.287057	0.210728	0.501955	0.0633471	1.09326e-05	1.41212e-18	temperate	Structure-specific recognition protein (SSRP1)
PF03786	0.149922	0.0749612	0.774867	0.017063	1.76302e-12	1.52472e-30	temperate	D-mannonate dehydratase (UxuA)
PF04178	0.325401	0.508534	0.165722	0.119259	8.87848e-08	1.76676e-06	temperate	Got1/Sft2-like family
PF04191	0.570961	0.394663	0.0342481	0.0342486	3.84654e-15	1.18641e-15	temperate	Phospholipid methyltransferase
PF03776	0.50619	0.482506	0	0.32456	0	0	temperate	Septum formation topological specificity factor MinE
PF04981	0.204666	0.271519	0.512401	0.48083	0.000503368	0.000122833	temperate	NMD3 family
PF03152	0.204769	0.197458	0.59277	0.848606	1.85401e-09	2.63861e-19	temperate	Ubiquitin fusion degradation protein UFD1
PF04979	0.526857	0.462368	0	0.544721	0	0	temperate	Protein phosphatase inhibitor 2 (IPP-2)
PF03153	0.566387	0.386505	0.0393705	0.204465	1.25863e-15	4.63634e-19	temperate	Transcription factor IIA, alpha/beta subunit
PF04992	0.162944	0.210132	0.626913	0.00826266	1.89943e-14	1.57699e-22	temperate	RNA polymerase Rpb1, domain 6
PF03097	0.127966	0.0655778	0.806316	0.0125795	7.39276e-11	2.49135e-27	temperate	BRO1-like domain
PF03703	0.590158	0.340516	0.0693182	0.00252047	4.12128e-12	6.44533e-07	temperate	Bacterial PH domain
PF04791	0.23898	0.268271	0.484677	0.982945	7.17138e-08	4.9641e-10	temperate	LMBR1-like membrane protein
PF04567	0.130345	0.322616	0.54666	0.379989	2.62561e-15	5.38244e-15	temperate	RNA polymerase Rpb2, domain 5
PF04566	0.130345	0.322616	0.54666	0.379989	2.62561e-15	5.38244e-15	temperate	RNA polymerase Rpb2, domain 4
PF04565	0.391435	0.217128	0.391422	0.0250733	1.40796e-05	3.02103e-15	temperate	RNA polymerase Rpb2, domain 3
PF03439	0.278719	0.102686	0.618516	0.00649109	2.31626e-05	3.86729e-25	temperate	Early transcription elongation factor of RNA pol II, NGN section
PF03604	0.32074	0.573896	0.105336	0.434306	2.51734e-06	4.54688e-14	temperate	DNA directed RNA polymerase, 7 kDa subunit
PF03441	0.315275	0.176666	0.508057	0.00101168	7.16791e-05	5.09511e-21	temperate	FAD binding domain of DNA photolyase
PF04406	0.0934254	0.108107	0.788939	0.951965	5.62568e-14	1.99581e-27	temperate	Type IIB DNA topoisomerase
PF03602	0.467367	0.335846	0.171398	0.925179	0.000149684	2.24035e-13	temperate	Conserved hypothetical protein 95
PF03601	0.181699	0.107812	0.705768	0.286746	6.7437e-10	3.98859e-26	temperate	Conserved hypothetical protein 698
PF03460	0.300889	0.152348	0.546762	0.00109532	0.000472202	1.6646e-21	temperate	Nitrite/Sulfite reductase ferredoxin-like half domain
PF04616	0.259375	0.725953	0.0143973	0.0123009	4.84304e-10	1.30635e-34	temperate	Glycosyl hydrolases family 43
PF04418	0.458087	0.53626	0	0.997979	0	0	temperate	Domain of unknown function (DUF543)
PF03577	0.192576	0.18475	0.621237	0.374304	5.49185e-13	6.13269e-25	temperate	Peptidase family C69
PF04561	0.391435	0.217128	0.391422	0.0250733	1.40796e-05	3.02103e-15	temperate	RNA polymerase Rpb2, domain 2
PF04451	0.104499	0.247293	0.648187	0.201243	5.57136e-16	5.30582e-20	temperate	Large eukaryotic DNA virus major capsid protein
PF03483	0.241763	0.225685	0.530881	0.18679	0.000167045	2.70798e-13	temperate	B3/4 domain
PF04560	0.391435	0.217128	0.391422	0.0250733	1.40796e-05	3.02103e-15	temperate	RNA polymerase Rpb2, domain 7
PF04495	0.227305	0.150008	0.613126	0.472164	0.000339997	5.6203e-11	temperate	GRASP55/65 PDZ-like domain
PF03484	0.241763	0.225685	0.530881	0.18679	0.000167045	2.70798e-13	temperate	tRNA synthetase B5 domain
PF04455	0.233003	0.136559	0.630374	0.0201504	2.75987e-10	3.34405e-28	temperate	LOR/SDH bifunctional enzyme conserved region
PF04452	0.504987	0.420149	0.0328031	0.971713	1.66216e-10	2.21788e-20	temperate	RNA methyltransferase domain
PF03496	0.189499	0.349123	0.453423	0.621291	2.3041e-06	2.32752e-09	temperate	ADP-ribosyltransferase exoenzyme
PF04563	0.391435	0.217128	0.391422	0.0250733	1.40796e-05	3.02103e-15	temperate	RNA polymerase beta subunit
PF03690	0.192645	0.122118	0.68261	0.399569	5.31232e-11	2.50567e-29	temperate	Uncharacterised protein family (UPF0160)
PF04670	0.26714	0.250662	0.477543	0.792625	0.000213213	2.01365e-09	temperate	Gtr1/RagA G protein conserved region
PF04679	0.159807	0.25285	0.583001	0.529844	2.30736e-11	3.39676e-13	temperate	ATP dependent DNA ligase C terminal region
PF04359	0.550771	0.356921	0.084991	0.361365	1.21113e-06	1.79181e-10	temperate	Protein of unknown function (DUF493)
PF03671	0.391876	0.537761	0.0669094	0.218304	1.01095e-08	9.00942e-20	temperate	Ubiquitin fold modifier 1 protein
PF04366	0.264597	0.184784	0.544833	0.266777	1.8681e-05	7.83727e-18	temperate	Las17-binding protein actin regulator
PF03665	0.600973	0.306824	0.0920972	0.00921052	2.37857e-08	1.72258e-05	temperate	Uncharacterised protein family (UPF0172)
PF03259	0.204841	0.150008	0.644062	0.185294	1.371e-09	3.16628e-24	temperate	Roadblock/LC7 domain
PF03271	0.647863	0.352115	0	0.00191174	0	0	temperate	EB1-like C-terminal motif
PF04765	0.246906	0.172915	0.578762	0.409876	7.15236e-09	5.66965e-22	temperate	TOD1/MUCI70, glycosyltransferase-like domain
PF03657	0.520225	0.358402	0.11884	0.227389	1.81036e-07	8.53432e-08	temperate	UPF0113 PUA domain
PF04078	0.157311	0.239406	0.602701	0.0794438	2.94543e-12	1.49409e-16	temperate	Cell differentiation family, Rcd1-like
PF04379	0.130812	0.310829	0.558076	0.0205693	1.371e-09	3.94508e-08	temperate	ApaG domain
PF04675	0.159807	0.25285	0.583001	0.529844	2.30736e-11	3.39676e-13	temperate	DNA ligase N terminus
PF03357	0.0919053	0.109108	0.798709	0.297941	8.27965e-17	9.39739e-33	temperate	Snf7
PF03372	0.271629	0.313625	0.414347	0.456672	4.07859e-05	0.000135823	temperate	Endonuclease/Exonuclease/phosphatase family
PF03378	0.143558	0.119611	0.732491	0.461616	1.83249e-12	1.77768e-27	temperate	CAS/CSE protein, C-terminus
PF04399	0.231419	0.321435	0.444926	0.324746	2.0341e-05	4.9423e-05	temperate	Glutaredoxin 2, C terminal domain
PF04403	0.158234	0.114406	0.726475	0.143421	3.9183e-14	8.97863e-32	temperate	Paraquat-inducible protein A
PF04716	0.612616	0.34504	0.042229	0.0121025	6.83645e-10	3.4747e-13	temperate	ETC complex I subunit conserved region
PF03643	0.108987	0.334285	0.556617	0.00840158	3.13061e-12	7.97976e-09	temperate	Vacuolar protein sorting-associated protein 26
PF04715	0.102575	0.0653405	0.829511	0.357097	5.74978e-15	4.79632e-35	temperate	Anthranilate synthase component I, N terminal region
PF03630	0.181948	0.136996	0.67536	0.337063	5.46667e-06	2.33652e-15	temperate	Fumble
PF04695	0.320791	0.57678	0.1017	0.354835	0.00037669	1.67774e-07	temperate	Pex14 N-terminal domain
PF04690	0.261523	0.615606	0.122825	0.0708442	0.000259698	6.69533e-07	temperate	YABBY protein
PF03656	0.513789	0.476059	0	0.557886	0	0	temperate	Pam16
PF03874	0.407241	0.535717	0.0525486	0.387248	4.42018e-09	9.39386e-22	temperate	RNA polymerase Rpb4
PF03798	0.442311	0.391988	0.165454	0.183354	1.55703e-10	1.25455e-05	temperate	TLC domain
PF04153	0.253982	0.224167	0.520715	0.612637	7.02068e-09	1.17098e-20	temperate	NOT2/NOT3/NOT5 C-terminal
PF03980	0.515526	0.4449	0.0183431	0.923849	9.62974e-17	9.42199e-32	temperate	Nnf1
PF03971	0.0942941	0.314729	0.590562	0.248587	1.34196e-14	1.59706e-21	temperate	Monomeric isocitrate dehydrogenase
PF03966	0.379605	0.465275	0.137056	0.988046	0.000159836	1.99666e-05	temperate	Trm112p-like protein
PF05183	0.186683	0.142647	0.667699	0.242406	7.5667e-11	6.75828e-27	temperate	RNA dependent RNA polymerase
PF02854	0.228297	0.207136	0.56423	0.289004	9.34094e-11	7.46352e-22	temperate	MIF4G domain
PF02867	0.264925	0.263958	0.470535	0.53809	3.78977e-05	1.39826e-10	temperate	Ribonucleotide reductase, barrel domain
PF02874	0.262661	0.226898	0.51044	0.00416525	2.24907e-11	1.22719e-21	temperate	ATP synthase alpha/beta family, beta-barrel domain
PF04134	0.464536	0.345312	0.189969	0.0513353	6.85223e-08	0.000716443	temperate	DCC1-like thiol-disulfide oxidoreductase
PF02877	0.130872	0.176053	0.691294	0.142457	2.14731e-10	3.53822e-18	temperate	Poly(ADP-ribose) polymerase, regulatory domain
PF03962	0.626323	0.356185	0	0.505501	0	0	temperate	Mnd1 HTH domain
PF02883	0.167805	0.228426	0.602654	0.421716	1.00585e-14	3.82156e-21	temperate	Adaptin C-terminal domain
PF03092	0.100761	0.66175	0.236732	0.883281	1.3121e-05	0.000254531	temperate	BT1 family
PF02889	0.29516	0.17885	0.525988	0.00222969	1.07935e-07	2.39055e-28	temperate	Sec63 Brl domain
PF02894	0.216865	0.217419	0.565004	0.557886	1.53234e-11	4.83077e-20	temperate	Oxidoreductase family, C-terminal alpha/beta domain
PF02910	0.132032	0.188682	0.678246	0.397466	9.07565e-13	1.60967e-20	temperate	Fumarate reductase flavoprotein C-term
PF02913	0.133839	0.113763	0.751967	0.100704	5.95199e-13	1.22231e-27	temperate	FAD linked oxidases, C-terminal domain
PF02919	0.147609	0.159928	0.688343	0.51726	1.94539e-12	1.51773e-23	temperate	Eukaryotic DNA topoisomerase I, DNA binding fragment
PF05153	0.235952	0.0913236	0.672708	0.00567675	3.22916e-07	4.47571e-27	temperate	Myo-inositol oxygenase
PF03941	0.540939	0.424854	0	0.866323	0	0	temperate	Inner centromere protein, ARK binding region
PF04137	0.240698	0.20631	0.552627	0.252489	1.22553e-09	5.22342e-21	temperate	Endoplasmic Reticulum Oxidoreductin 1 (ERO1)
PF05151	0.403334	0.460407	0.136044	0.685078	1.02562e-09	9.25542e-06	temperate	Photosystem II reaction centre M protein (PsbM)
PF02847	0.259573	0.216872	0.523424	0.0827136	3.16189e-08	1.96464e-19	temperate	MA3 domain
PF03981	0.488225	0.413447	0.0804431	0.907279	1.90167e-05	2.26957e-14	temperate	Ubiquinol-cytochrome C chaperone
PF02841	0.181847	0.216287	0.594074	0.538443	1.22573e-08	4.16815e-17	temperate	Guanylate-binding protein, C-terminal domain
PF04133	0.64177	0.258614	0.0996029	0.0024413	2.02355e-09	0.000566453	temperate	Vacuolar protein sorting 55
PF05470	0.283028	0.207164	0.509208	0.17774	2.95919e-05	1.11127e-15	temperate	Eukaryotic translation initiation factor 3 subunit 8 N-terminus
PF02781	0.165499	0.225752	0.607674	0.966419	2.20162e-13	1.6215e-22	temperate	Glucose-6-phosphate dehydrogenase, C-terminal domain
PF05406	0.130872	0.176053	0.691294	0.142457	2.14731e-10	3.53822e-18	temperate	WGR domain
PF04054	0.0744627	0.0854474	0.838361	0.967678	4.03183e-17	2.18732e-35	temperate	CCR4-Not complex component, Not1
PF04086	0.17677	0.265155	0.555108	0.217101	4.1501e-07	3.5659e-08	temperate	Signal recognition particle, alpha subunit, N-terminal
PF02784	0.161946	0.162448	0.673743	0.892136	2.66745e-11	7.84714e-24	temperate	Pyridoxal-dependent decarboxylase, pyridoxal binding domain
PF04049	0.154651	0.248126	0.595669	0.0907433	4.16434e-09	1.68171e-11	temperate	Anaphase promoting complex subunit 8 / Cdc23
PF02798	0.302748	0.512373	0.184767	0.406758	3.89978e-06	3.04644e-10	temperate	Glutathione S-transferase, N-terminal domain
PF05222	0.140876	0.172317	0.686427	0.445758	2.08923e-16	1.36493e-32	temperate	Alanine dehydrogenase/PNT, N-terminal domain
PF05201	0.16453	0.117913	0.717378	0.0847119	1.87374e-10	3.49195e-25	temperate	Glutamyl-tRNAGlu reductase, N-terminal domain
PF03935	0.201118	0.178829	0.618694	0.245533	6.11708e-10	8.86496e-20	temperate	Beta-glucan synthesis-associated protein SKN1/KRE6/Sbg1
PF02800	0.130044	0.378448	0.491505	0.0136584	2.01067e-14	0.000148185	temperate	Glyceraldehyde 3-phosphate dehydrogenase, C-terminal domain
PF04095	0.233046	0.35247	0.412921	0.46882	6.28518e-07	1.02134e-06	temperate	Nicotinate phosphoribosyltransferase (NAPRTase) family
PF04037	0.292708	0.186608	0.52038	0.0594258	1.85812e-05	9.65581e-22	temperate	Domain of unknown function (DUF382)
PF04030	0.674313	0.310532	0.0150556	0.0594258	1.31723e-12	2.26045e-11	temperate	D-arabinono-1,4-lactone oxidase
PF04109	0.266801	0.0833124	0.64979	0.0051141	1.8825e-07	7.66893e-27	temperate	Autophagy protein ATG9
PF03987	0.181576	0.0811387	0.73589	0.179194	1.72104e-11	2.63368e-32	temperate	Autophagocytosis associated protein, active-site domain
PF03986	0.181576	0.0811387	0.73589	0.179194	1.72104e-11	2.63368e-32	temperate	Autophagy_N
PF03982	0.714229	0.240054	0.037298	0.491884	3.78101e-05	6.3159e-11	temperate	Diacylglycerol acyltransferase
PF02820	0.170873	0.2244	0.594727	0.868166	1.28562e-06	4.8286e-10	temperate	mbt repeat
PF02823	0.183717	0.275057	0.541118	0.264364	4.71066e-09	8.76154e-14	temperate	ATP synthase, Delta/Epsilon chain, beta-sandwich domain
PF02824	0.249713	0.220494	0.528327	0.486771	3.30762e-08	1.94401e-18	temperate	TGS domain
PF04046	0.292708	0.186608	0.52038	0.0594258	1.85812e-05	9.65581e-22	temperate	PSP
PF05116	0.0956943	0.67714	0.219721	0.845347	1.18616e-06	1.85995e-13	temperate	Sucrose-6F-phosphate phosphohydrolase
PF03552	0.145256	0.171964	0.678267	0.385227	5.41287e-12	2.08292e-20	temperate	Cellulose synthase
PF02984	0.321889	0.241835	0.436206	0.03521	0.000260678	6.53579e-13	temperate	Cyclin, C-terminal domain
PF02985	0.304413	0.242989	0.452579	0.0329764	0.000277042	1.51197e-13	temperate	HEAT repeat
PF02990	0.278341	0.25116	0.470417	0.297941	3.00202e-09	7.53915e-13	temperate	Endomembrane protein 70
PF04143	0.0520827	0.298875	0.649035	0.0013963	9.89107e-15	1.2697e-16	temperate	Sulphur transport
PF05063	0.125998	0.163148	0.706466	0.562918	8.28762e-15	1.38284e-27	temperate	MT-A70
PF03912	0.318618	0.561492	0.118544	0.226858	0.000850696	4.47401e-08	temperate	Psb28 protein
PF03061	0.547765	0.269612	0.1703	0.884949	1.16372e-08	1.87558e-16	temperate	Thioesterase superfamily
PF03060	0.231722	0.136343	0.631934	0.00182568	1.90745e-07	7.68685e-25	temperate	Nitronate monooxygenase
PF03006	0.247559	0.239885	0.506869	0.558185	7.10662e-06	3.16124e-12	temperate	Haemolysin-III related
PF05064	0.219059	0.301187	0.467821	0.506288	0.000322159	2.09315e-05	temperate	Nsp1-like C-terminal region
PF03033	0.168195	0.284577	0.544957	0.117469	1.55601e-08	5.4209e-08	temperate	Glycosyltransferase family 28 N-terminal domain
PF03911	0.405377	0.485507	0.108713	0.555691	3.51311e-08	9.05807e-06	temperate	Sec61beta family
PF05071	0.469967	0.332274	0.19771	0.0150969	4.1501e-07	3.09272e-05	temperate	NADH ubiquinone oxidoreductase subunit NDUFA12
PF02943	0.248469	0.253326	0.492237	0.917446	3.71995e-06	1.39462e-12	temperate	Ferredoxin thioredoxin reductase catalytic beta chain
PF05088	0.0583767	0.0692725	0.871313	0.781194	1.19121e-16	6.58653e-34	temperate	Bacterial NAD-glutamate dehydrogenase, catalytic domain
PF03029	0.186683	0.142647	0.667699	0.242406	7.5667e-11	6.75828e-27	temperate	Conserved hypothetical ATP binding protein
PF02970	0.49358	0.494559	0	0.888292	0	0	temperate	Tubulin binding cofactor A
PF05050	0.367179	0.466524	0.165401	0.540098	1.18574e-09	1.99736e-14	temperate	Methyltransferase FkbM domain
PF03030	0.209702	0.172783	0.617463	0.169332	2.14052e-14	7.0779e-31	temperate	Inorganic H+ pyrophosphatase
PF03917	0.121932	0.0770095	0.801056	0.00153793	1.2671e-16	1.20112e-35	temperate	Eukaryotic glutathione synthase, ATP binding domain
[truncated: 468 more rows]

## Sheet: Fe correlation
Supplementary Table S6: Phaeocystales adaptations in temperate and polar biotopes, continued. Sheet "Fe correlation" lists Pfams occurrence from the Marine Atlas of Tara Oceans Unigenes (MATOU). MATOU unigenes were filtered to Phaeocystales sequences and correlated with predicted iron levels ("Iron_5m", see Methods). Significance was calculated as p-adjusted Spearman correlation.
Feature	Annotation	Correlation	P-Value	Corrected P-Value	Reject
PF10914	-	-0.232698	0.00549031	0.0191099	TRUE
PF14288	1,3-beta-glucan synthase subunit FKS1, domain-1	-0.328258	7.07229e-05	0.000672071	TRUE
PF08436	1-deoxy-D-xylulose 5-phosphate reductoisomerase C-terminal domain	-0.254057	0.00236622	0.0101473	TRUE
PF00244	14-3-3 protein	0.378715	3.64534e-06	6.56162e-05	TRUE
PF01128	2-C-methyl-D-erythritol 4-phosphate cytidylyltransferase	-0.278577	0.000823014	0.00444682	TRUE
PF11968	25S rRNA (adenine(2142)-N(1))-methyltransferase, Bmt2	-0.321806	9.97291e-05	0.000879963	TRUE
PF13085	2Fe-2S iron-sulfur cluster binding domain	0.236279	0.00479129	0.0172486	TRUE
PF13661	2OG-Fe(II) oxygenase superfamily	-0.285774	0.000592355	0.00344265	TRUE
PF03725	3' exoribonuclease family, domain 2	-0.2914	0.000455267	0.00281194	TRUE
PF01612	3'-5' exonuclease	-0.311047	0.00017392	0.0013233	TRUE
PF00233	3'5'-cyclic nucleotide phosphodiesterase	0.26742	0.00134708	0.00651813	TRUE
PF00926	3,4-dihydroxy-2-butanone 4-phosphate synthase	-0.462667	7.64263e-09	5.83046e-07	TRUE
PF08545	3-Oxoacyl-[acyl-carrier-protein (ACP)] synthase III	-0.230235	0.00602251	0.0205535	TRUE
PF01761	3-dehydroquinate synthase	-0.468454	4.68294e-09	4.47007e-07	TRUE
PF00725	3-hydroxyacyl-CoA dehydrogenase, C-terminal domain	0.339413	3.83286e-05	0.000414897	TRUE
PF02737	3-hydroxyacyl-CoA dehydrogenase, NAD binding domain	0.323187	9.27181e-05	0.00082845	TRUE
PF16121	40S ribosomal protein S4 C-terminus	0.30301	0.00025994	0.00181623	TRUE
PF04950	40S ribosome biogenesis protein Tsr1 and BMS1 C-terminal	0.256889	0.00210499	0.00923499	TRUE
PF13183	4Fe-4S dicluster domain	0.263538	0.0015913	0.00737146	TRUE
PF13534	4Fe-4S dicluster domain	0.271298	0.00113768	0.0056794	TRUE
PF12769	4TM region of pyridine nucleotide transhydrogenase, mitoch	-0.26616	0.0014223	0.00679854	TRUE
PF06941	5' nucleotidase, deoxy (Pyrimidine), cytosolic type C protein (NT5C)	-0.302259	0.00026973	0.00185919	TRUE
PF04739	5'-AMP-activated protein kinase beta subunit, interaction domain	-0.290724	0.000470028	0.00288052	TRUE
PF02872	5'-nucleotidase, C-terminal domain	-0.398284	1.00229e-06	2.54075e-05	TRUE
PF00393	6-phosphogluconate dehydrogenase, C-terminal domain	-0.313903	0.000150356	0.0012029	TRUE
PF02096	60Kd inner membrane protein	-0.238758	0.00435525	0.0162355	TRUE
PF13175	AAA ATPase domain	-0.336658	4.46858e-05	0.000463028	TRUE
PF13191	AAA ATPase domain	-0.339544	3.8049e-05	0.000413291	TRUE
PF13238	AAA domain	-0.285428	0.000601908	0.00346006	TRUE
PF13476	AAA domain	-0.396063	1.16538e-06	2.82381e-05	TRUE
PF13481	AAA domain	-0.279505	0.000789214	0.00433105	TRUE
PF13500	AAA domain	-0.291505	0.000453019	0.00280356	TRUE
PF02608	ABC transporter substrate-binding protein PnrA-like	0.312668	0.000160156	0.00125808	TRUE
PF06472	ABC transporter transmembrane region 2	-0.3347	4.97932e-05	0.000509249	TRUE
PF03109	ABC1 atypical kinase-like domain	-0.274152	0.00100308	0.00517137	TRUE
PF00025	ADP-ribosylation factor family	0.366308	7.92403e-06	0.000117186	TRUE
PF01594	AI-2E family transporter	-0.24958	0.00283947	0.0116614	TRUE
PF15924	ALG11 mannosyltransferase N-terminus	-0.304593	0.000240381	0.00170925	TRUE
PF05208	ALG3 protein	-0.249316	0.00286992	0.0117254	TRUE
PF13949	ALIX V-shaped domain binding to HIV	0.311988	0.000165798	0.00129024	TRUE
PF00501	AMP-binding enzyme	0.311804	0.000167364	0.00129533	TRUE
PF01992	ATP synthase (C/AC39) subunit	0.255352	0.00224328	0.00974669	TRUE
PF00137	ATP synthase subunit C	0.221336	0.00834882	0.0262463	TRUE
PF02617	ATP-dependent Clp protease adaptor protein ClpS	-0.337655	4.22784e-05	0.000445408	TRUE
PF02190	ATP-dependent protease La (LON) substrate-binding domain	-0.295593	0.000372861	0.00238722	TRUE
PF13535	ATP-grasp domain	0.348281	2.31546e-05	0.000277327	TRUE
PF08442	ATP-grasp domain	0.226935	0.00680763	0.0226442	TRUE
PF02655	ATP-grasp domain	0.312519	0.000161381	0.00126455	TRUE
PF05176	ATP10 protein	-0.324895	8.46783e-05	0.000772251	TRUE
PF06644	ATP11 protein	-0.30683	0.000215052	0.00156446	TRUE
PF07542	ATP12 chaperone protein	-0.244896	0.0034247	0.0134344	TRUE
PF16886	ATPsynthase alpha/beta subunit N-term extension	0.226958	0.00680165	0.0226442	TRUE
PF15780	Abnormal spindle-like microcephaly-assoc'd, ASPM-SPD-2-Hydin	-0.2427	0.0037348	0.0144706	TRUE
PF03069	Acetamidase/Formamidase family	0.239091	0.00429955	0.0161425	TRUE
PF01450	Acetohydroxy acid isomeroreductase, catalytic domain	-0.22455	0.00743014	0.0242287	TRUE
PF08326	Acetyl-CoA carboxylase, central region	-0.220535	0.00859315	0.026907	TRUE
PF13000	Acetyl-coenzyme A transporter 1	-0.299534	0.000308187	0.00205994	TRUE
PF13302	Acetyltransferase (GNAT) domain	-0.471144	3.71784e-09	3.7778e-07	TRUE
PF05427	Acidic fibroblast growth factor binding (FIBP)	-0.237442	0.00458216	0.0167182	TRUE
PF00022	Actin	0.31896	0.000115773	0.000980339	TRUE
PF00887	Acyl CoA binding protein	-0.226839	0.00683174	0.0227004	TRUE
PF08028	Acyl-CoA dehydrogenase, C-terminal domain	0.297876	0.000334011	0.00219912	TRUE
PF00441	Acyl-CoA dehydrogenase, C-terminal domain	0.287595	0.000544286	0.00322882	TRUE
PF02771	Acyl-CoA dehydrogenase, N-terminal domain	0.243201	0.00366194	0.0142761	TRUE
PF01553	Acyltransferase	-0.279111	0.000803398	0.00440123	TRUE
PF01757	Acyltransferase family	-0.224692	0.00739167	0.0242185	TRUE
PF00928	Adaptor complexes medium subunit family	0.289158	0.000505944	0.00304882	TRUE
PF00211	Adenylate and Guanylate cyclase catalytic domain	0.274197	0.00100108	0.00516953	TRUE
PF00406	Adenylate kinase	-0.259564	0.00188253	0.0084714	TRUE
PF05191	Adenylate kinase, active site lid	-0.27165	0.00112023	0.00561004	TRUE
PF01262	Alanine dehydrogenase/PNT, C-terminal domain	-0.327893	7.21252e-05	0.000679744	TRUE
PF05222	Alanine dehydrogenase/PNT, N-terminal domain	-0.238454	0.00440671	0.0163308	TRUE
PF01168	Alanine racemase, N-terminal domain	-0.396337	1.14398e-06	2.79343e-05	TRUE
PF08240	Alcohol dehydrogenase GroES-like domain	-0.448943	2.35622e-08	1.34947e-06	TRUE
PF00171	Aldehyde dehydrogenase family	0.302792	0.000262751	0.00182208	TRUE
PF00248	Aldo/keto reductase family	-0.249352	0.00286574	0.0117254	TRUE
PF03737	Aldolase/RraA	-0.285532	0.000599026	0.00345592	TRUE
PF03901	Alg9-like mannosyltransferase family	-0.429299	1.08549e-07	4.44064e-06	TRUE
PF04864	Allinase	-0.398852	9.64241e-07	2.50578e-05	TRUE
PF09261	Alpha mannosidase middle domain	-0.255166	0.00226064	0.00980856	TRUE
PF06964	Alpha-L-arabinofuranosidase C-terminal domain	-0.287481	0.000547198	0.00323999	TRUE
PF12697	Alpha/beta hydrolase family	-0.432819	8.31404e-08	3.62159e-06	TRUE
PF01425	Amidase	-0.37778	3.86947e-06	6.88635e-05	TRUE
PF07969	Amidohydrolase family	-0.217423	0.00960242	0.029426	TRUE
PF00696	Amino acid kinase family	-0.261014	0.0017711	0.0080621	TRUE
PF01063	Amino-transferase class IV	-0.381577	3.03378e-06	5.82708e-05	TRUE
PF04073	Aminoacyl-tRNA editing domain	-0.232407	0.00555087	0.0192781	TRUE
PF00155	Aminotransferase class I and II	-0.313865	0.00015065	0.0012029	TRUE
PF00202	Aminotransferase class-III	-0.221336	0.00834882	0.0262463	TRUE
PF00909	Ammonium Transporter Family	0.382406	2.87563e-06	5.63863e-05	TRUE
PF12861	Anaphase-promoting complex subunit 11 RING-H2 finger	0.305248	0.000232685	0.00167033	TRUE
PF12895	Anaphase-promoting complex, cyclosome, subunit 3	0.229356	0.00622335	0.0210564	TRUE
PF04715	Anthranilate synthase component I, N terminal region	-0.257776	0.00202865	0.00896249	TRUE
PF08592	Anthrone oxygenase	-0.39832	9.99892e-07	2.54075e-05	TRUE
PF03992	Antibiotic biosynthesis monooxygenase	-0.391846	1.54697e-06	3.48386e-05	TRUE
PF06079	Apyrase	-0.284823	0.000618966	0.00352576	TRUE
PF03485	Arginyl tRNA synthetase N terminal domain	-0.328101	7.13247e-05	0.000674693	TRUE
PF00339	Arrestin (or S-antigen), N-terminal domain	-0.258726	0.0019498	0.00869954	TRUE
PF16186	Atypical Arm repeat	0.278517	0.000825232	0.00445116	TRUE
PF02991	Autophagy protein Atg8 ubiquitin like	0.222635	0.00796616	0.0254432	TRUE
PF10381	Autophagy_C	0.232819	0.00546525	0.0190906	TRUE
PF02310	B12 binding domain	-0.265985	0.00143307	0.00683965	TRUE
PF03909	BSD domain	-0.253939	0.00237767	0.0101762	TRUE
PF17389	Bacterial alpha-L-rhamnosidase 6 hairpin glycosidase domain	-0.257836	0.00202365	0.00896249	TRUE
PF00497	Bacterial extracellular solute-binding proteins, family 3	-0.401135	8.24671e-07	2.20145e-05	TRUE
PF00496	Bacterial extracellular solute-binding proteins, family 5 Middle	-0.268799	0.00126886	0.0062064	TRUE
PF05697	Bacterial trigger factor protein (TF)	-0.245405	0.00335622	0.0132483	TRUE
PF08031	Berberine and berberine like	0.260903	0.00177941	0.00808823	TRUE
PF13225	Beta-carotene isomerase D27-like, C-terminal	-0.236235	0.00479948	0.0172584	TRUE
PF01212	Beta-eliminating lyase	-0.316599	0.000130875	0.00109935	TRUE
PF00144	Beta-lactamase	-0.341966	3.32036e-05	0.00037488	TRUE
PF13483	Beta-lactamase superfamily domain	-0.273078	0.00105191	0.00531867	TRUE
PF02785	Biotin carboxylase C-terminal domain	-0.256906	0.00210343	0.00923499	TRUE
PF00289	Biotin carboxylase, N-terminal domain	-0.273451	0.00103471	0.00526547	TRUE
PF13533	Biotin-lipoyl like	0.26183	0.00171104	0.00786829	TRUE
PF03099	Biotin/lipoate A/B protein ligase family	-0.231766	0.00568659	0.0196197	TRUE
PF01722	BolA-like protein	-0.23891	0.00432976	0.016198	TRUE
PF07524	Bromodomain associated	-0.36252	9.98094e-06	0.000139733	TRUE
PF00145	C-5 cytosine-specific DNA methylase	-0.269702	0.00121995	0.00601386	TRUE
PF16206	C-terminal region of Mon2 protein	-0.220459	0.00861662	0.0269537	TRUE
PF14707	C-terminal region of aryl-sulfatase	-0.235705	0.00489776	0.0175425	TRUE
PF00168	C2 domain	0.264021	0.00155889	0.00726407	TRUE
PF10409	C2 domain of PTEN tumour-suppressor protein	0.268262	0.00129882	0.00631369	TRUE
PF13894	C2H2-type zinc finger	-0.362416	1.00437e-05	0.00013999	TRUE
PF01302	CAP-Gly domain	0.251668	0.00260904	0.0109503	TRUE
PF16415	CCR4-NOT transcription complex subunit 1 CAF1-binding domain	-0.220085	0.00873277	0.0272122	TRUE
PF05600	CDK5 regulatory subunit-associated protein 3	-0.360634	1.11838e-05	0.000153169	TRUE
PF05018	CFA20 domain	0.247224	0.00312147	0.0125097	TRUE
PF01807	CHC2 zinc finger	-0.297046	0.000347682	0.00226281	TRUE
PF02487	CLN3 protein	-0.505165	1.67773e-10	4.8044e-08	TRUE
PF07258	COMM domain	-0.293315	0.00041574	0.00260873	TRUE
PF08511	COQ9	-0.379236	3.52599e-06	6.45748e-05	TRUE
PF00650	CRAL/TRIO domain	-0.236535	0.00474459	0.0171197	TRUE
PF01985	CRS1 / YhbY (CRM) domain	-0.374424	4.78581e-06	7.93438e-05	TRUE
PF07496	CW-type Zinc Finger	-0.32094	0.000104377	0.000898329	TRUE
PF08726	Ca2+ insensitive EF hand	0.391176	1.61757e-06	3.58828e-05	TRUE
PF03269	Caenorhabditis protein of unknown function, DUF268	-0.309953	0.000183823	0.00137867	TRUE
PF03530	Calcium-activated SK potassium channel	-0.219144	0.00903192	0.0278927	TRUE
PF07645	Calcium-binding EGF domain	-0.358468	1.27339e-05	0.000167832	TRUE
PF01216	Calsequestrin	-0.293891	0.000404477	0.0025482	TRUE
PF05704	Capsular polysaccharide synthesis protein	-0.274114	0.00100478	0.00517166	TRUE
PF00988	Carbamoyl-phosphate synthase small chain, CPSase domain	0.219288	0.00898556	0.0278041	TRUE
PF16861	Carbamoyltransferase C-terminus	-0.237592	0.00455579	0.0166869	TRUE
PF02018	Carbohydrate binding domain	-0.237103	0.0046422	0.0168467	TRUE
PF03629	Carbohydrate esterase, sialic acid-specific acetylesterase	-0.384348	2.53518e-06	5.19014e-05	TRUE
PF06452	Carbohydrate family 9 binding domain-like	-0.391735	1.55842e-06	3.48386e-05	TRUE
PF02627	Carboxymuconolactone decarboxylase family	0.246635	0.00319584	0.0127752	TRUE
PF08773	Cathepsin C exclusion domain	-0.285427	0.00060194	0.00346006	TRUE
PF08246	Cathepsin propeptide inhibitor domain (I29)	0.237849	0.00451094	0.0165805	TRUE
PF00690	Cation transporter/ATPase, N-terminus	-0.300984	0.000287131	0.00195771	TRUE
PF15511	Centromere kinetochore component CENP-T histone fold	-0.301327	0.00028235	0.00193348	TRUE
PF04752	ChaC-like protein	-0.30025	0.000297611	0.00200315	TRUE
PF13290	Chitobiase/beta-hexosaminidase C-terminal domain	-0.370263	6.20807e-06	9.63322e-05	TRUE
PF16940	Chloroplast envelope transporter	-0.268428	0.0012895	0.00627808	TRUE
PF00755	Choline/Carnitine o-acyltransferase	0.229708	0.00614221	0.0208641	TRUE
PF02417	Chromate transporter	0.238119	0.00446408	0.0164492	TRUE
PF14777	Cilia BBSome complex subunit 10	-0.224557	0.00742829	0.0242287	TRUE
PF11069	Cilia- and flagella-associated protein 298	0.275309	0.000952797	0.00498556	TRUE
PF14781	Ciliary BBSome complex subunit 2, N-terminal	-0.229651	0.0061552	0.0208707	TRUE
PF11496	Class II histone deacetylase complex subunits 2 and 3	-0.315852	0.000136024	0.00112537	TRUE
PF14796	Clathrin-adaptor complex-3 beta-1 subunit C-terminal	-0.368734	6.8252e-06	0.000104366	TRUE
PF02861	Clp amino terminal domain, pathogenicity island component	-0.380683	3.21343e-06	6.05702e-05	TRUE
PF00549	CoA-ligase	0.290988	0.000464209	0.00285041	TRUE
PF02492	CobW/HypB/UreG, nucleotide-binding domain	0.371921	5.59912e-06	8.95291e-05	TRUE
PF07683	Cobalamin synthesis protein cobW C-terminal domain	0.362629	9.91534e-06	0.000139434	TRUE
PF02654	Cobalamin-5-phosphate synthase	-0.314264	0.000147604	0.0011861	TRUE
PF01717	Cobalamin-independent synthase, Catalytic domain	-0.262781	0.00164341	0.00756833	TRUE
PF11152	Cofactor assembly of complex C subunit B, CCB2/CCB4	-0.445744	3.04199e-08	1.61011e-06	TRUE
PF00241	Cofilin/tropomyosin-type actin-binding protein	0.223113	0.0078292	0.0252455	TRUE
PF00264	Common central domain of tyrosinase	-0.326678	7.69888e-05	0.000717259	TRUE
PF02464	Competence-damaged protein	-0.326731	7.67715e-05	0.000717259	TRUE
PF12662	Complement Clr-like EGF-like	-0.300585	0.000292786	0.00198339	TRUE
PF08547	Complex I intermediate-associated protein 30 (CIA30)	-0.446441	2.87789e-08	1.56299e-06	TRUE
PF09585	Conserved hypothetical protein (Lin0512_fam)	-0.31116	0.000172929	0.00131948	TRUE
PF03601	Conserved hypothetical protein 698	-0.438041	5.56664e-08	2.6568e-06	TRUE
PF03602	Conserved hypothetical protein 95	-0.228569	0.00640812	0.0215536	TRUE
PF06799	Conserved in the green lineage and diatoms 27	-0.29806	0.00033105	0.00218618	TRUE
PF01218	Coproporphyrinogen III oxidase	-0.314484	0.000145945	0.00118182	TRUE
PF06206	CpeT/CpcT family (DUF1001)	-0.230822	0.00589163	0.0202164	TRUE
PF16189	Creatinase/Prolidase N-terminal domain	-0.404188	6.67821e-07	1.94781e-05	TRUE
PF04145	Ctr copper transporter family	-0.30524	0.000232786	0.00167033	TRUE
PF00888	Cullin family	0.216747	0.00983486	0.0299611	TRUE
PF10557	Cullin protein neddylation domain	0.223815	0.00763189	0.0247453	TRUE
PF00027	Cyclic nucleotide-binding domain	0.277526	0.000862867	0.0045751	TRUE
PF05995	Cysteine dioxygenase type I	0.260557	0.00180554	0.00818336	TRUE
PF00188	Cysteine-rich secretory protein family	-0.363503	9.40329e-06	0.000133425	TRUE
PF00067	Cytochrome P450	-0.397	1.09374e-06	2.71283e-05	TRUE
PF13631	Cytochrome b(N-terminal)/b6/petB	-0.295909	0.000367231	0.00235596	TRUE
PF00033	Cytochrome b/b6/petB	-0.295909	0.000367231	0.00235596	TRUE
PF08583	Cytochrome c oxidase biogenesis protein Cmc1 like	-0.356786	1.40753e-05	0.000182458	TRUE
PF00510	Cytochrome c oxidase subunit III	-0.241664	0.00388967	0.0149238	TRUE
PF02936	Cytochrome c oxidase subunit IV	-0.362918	9.74278e-06	0.000137622	TRUE
PF01215	Cytochrome c oxidase subunit Vb	0.232813	0.00546657	0.0190906	TRUE
PF05093	Cytokine-induced anti-apoptosis inhibitor 1, Fe-S biogenesis	-0.258656	0.00195555	0.00871283	TRUE
PF12763	Cytoskeletal-regulatory complex EF hand	0.431527	9.17263e-08	3.8525e-06	TRUE
PF02789	Cytosol aminopeptidase family, N-terminal domain	-0.263052	0.00162456	0.00750346	TRUE
PF00883	Cytosol aminopeptidase family, catalytic domain	-0.368497	6.92587e-06	0.000105394	TRUE
PF00389	D-isomer specific 2-hydroxyacid dehydrogenase, catalytic domain	-0.32077	0.000105313	0.000903909	TRUE
PF03786	D-mannonate dehydratase (UxuA)	-0.22309	0.00783587	0.0252455	TRUE
PF00793	DAHP synthetase I family	-0.272503	0.00107897	0.005438	TRUE
PF05746	DALR anticodon binding domain	-0.282755	0.000680682	0.00379495	TRUE
PF04134	DCC1-like thiol-disulfide oxidoreductase	-0.28718	0.000554924	0.00327957	TRUE
PF02862	DDHD domain	-0.270035	0.00120233	0.00594571	TRUE
PF08766	DEK C terminal domain	-0.46518	6.18517e-09	5.26576e-07	TRUE
PF02141	DENN (AEX-3) domain	-0.353455	1.71337e-05	0.000215024	TRUE
PF14878	DLD	0.252368	0.00253563	0.0107068	TRUE
PF08418	DNA polymerase alpha subunit B N-terminal	-0.343222	3.09254e-05	0.000351973	TRUE
PF08275	DNA primase catalytic core, N-terminal domain	-0.323162	9.2839e-05	0.00082845	TRUE
PF14966	DNA repair REX1-B	-0.219958	0.00877262	0.0273061	TRUE
PF01131	DNA topoisomerase	-0.309881	0.000184497	0.00138044	TRUE
PF00940	DNA-dependent RNA polymerase	-0.374505	4.76137e-06	7.93438e-05	TRUE
PF03351	DOMON domain	-0.388073	1.98658e-06	4.21993e-05	TRUE
PF05219	DREV methyltransferase	-0.233524	0.00532149	0.0186875	TRUE
PF03942	DTW domain	-0.280135	0.00076701	0.00423132	TRUE
PF02698	DUF218 domain	-0.355484	1.52034e-05	0.000193108	TRUE
PF13288	DXP reductoisomerase C-terminal domain	-0.263767	0.00157584	0.00732138	TRUE
PF02733	Dak1 domain	-0.42471	1.52989e-07	5.8062e-06	TRUE
PF01937	Damage-control phosphatase ARMT1-like domain	-0.242244	0.00380226	0.0146599	TRUE
PF01220	Dehydroquinase class II	-0.290506	0.000474889	0.00290466	TRUE
PF10563	Delta carbonic anhydrase	-0.403527	6.99147e-07	2.02047e-05	TRUE
PF00781	Diacylglycerol kinase catalytic domain	-0.379034	3.57191e-06	6.50377e-05	TRUE
PF01738	Dienelactone hydrolase family	-0.369765	6.40321e-06	9.88731e-05	TRUE
PF05173	Dihydrodipicolinate reductase, C-terminus	-0.23968	0.00420242	0.0158534	TRUE
PF14691	Dihydroprymidine dehydrogenase domain II, 4Fe-4S cluster	0.251573	0.00261917	0.0109567	TRUE
PF01207	Dihydrouridine synthase (Dus)	-0.217513	0.00957172	0.0293868	TRUE
PF01873	Domain found in IF2B/IF5	0.265833	0.00144246	0.00686369	TRUE
PF03994	Domain of Unknown Function (DUF350)	-0.477163	2.20209e-09	2.47735e-07	TRUE
PF08854	Domain of unknown function (DUF1824)	-0.488446	8.02424e-10	1.39844e-07	TRUE
PF08855	Domain of unknown function (DUF1825)	-0.377454	3.95051e-06	6.95201e-05	TRUE
PF09269	Domain of unknown function (DUF1967)	0.340797	3.54651e-05	0.000391982	TRUE
PF03713	Domain of unknown function (DUF305)	-0.490948	6.38262e-10	1.35861e-07	TRUE
PF11934	Domain of unknown function (DUF3452)	-0.294068	0.000401084	0.00253189	TRUE
PF11958	Domain of unknown function (DUF3472)	-0.466216	5.66578e-09	4.95756e-07	TRUE
PF11965	Domain of unknown function (DUF3479)	-0.340729	3.55997e-05	0.000392095	TRUE
PF12204	Domain of unknown function (DUF3598), N-terminal	-0.27964	0.000784395	0.00431212	TRUE
PF04087	Domain of unknown function (DUF389)	-0.36453	8.83375e-06	0.000126483	TRUE
PF13475	Domain of unknown function (DUF4116)	-0.462464	7.77395e-09	5.83046e-07	TRUE
PF13870	Domain of unknown function (DUF4201)	0.235354	0.00496381	0.0176678	TRUE
PF13886	Domain of unknown function (DUF4203)	-0.482581	1.36238e-09	1.78812e-07	TRUE
PF14234	Domain of unknown function (DUF4336)	-0.277898	0.00084856	0.00453045	TRUE
PF14388	Domain of unknown function (DUF4419)	0.31623	0.000133395	0.00111162	TRUE
PF14534	Domain of unknown function (DUF4440)	-0.275922	0.000927097	0.00487539	TRUE
PF14644	Domain of unknown function (DUF4456)	-0.358013	1.30838e-05	0.000171725	TRUE
PF14737	Domain of unknown function (DUF4470)	-0.31449	0.000145898	0.00118182	TRUE
PF14988	Domain of unknown function (DUF4515)	-0.37954	3.45812e-06	6.37023e-05	TRUE
PF15916	Domain of unknown function (DUF4743)	-0.324398	8.69488e-05	0.000784781	TRUE
PF16156	Domain of unknown function (DUF4864)	-0.271878	0.00110908	0.00557193	TRUE
PF16315	Domain of unknown function (DUF4955)	-0.234866	0.00505703	0.017959	TRUE
PF04418	Domain of unknown function (DUF543)	-0.329508	6.61074e-05	0.000636814	TRUE
PF07987	Domain of unkown function (DUF1775)	-0.382372	2.88197e-06	5.63863e-05	TRUE
PF04124	Dor1-like family	-0.333063	5.44767e-05	0.000548248	TRUE
PF07681	DoxX	-0.530038	1.38982e-11	8.75585e-09	TRUE
PF12388	Dual-action HEIGH metallo-peptidase	-0.401491	8.047e-07	2.20145e-05	TRUE
PF03028	Dynein heavy chain region D6 P-loop domain	0.227666	0.00662611	0.0221339	TRUE
PF16421	E2F transcription factor CC-MB domain	0.228865	0.00633799	0.0213526	TRUE
PF02319	E2F/DP family winged-helix DNA-binding domain	0.226625	0.00688584	0.022856	TRUE
PF13202	EF hand	0.345516	2.71386e-05	0.000316617	TRUE
PF00036	EF hand	0.417369	2.62124e-07	8.69149e-06	TRUE
PF14658	EF-hand domain	0.228015	0.00654104	0.0219194	TRUE
PF13405	EF-hand domain	0.449701	2.21714e-08	1.34212e-06	TRUE
PF13833	EF-hand domain pair	0.466468	5.54585e-09	4.95756e-07	TRUE
PF13499	EF-hand domain pair	0.460815	8.92305e-09	6.53665e-07	TRUE
PF12947	EGF domain	-0.319448	0.000112861	0.00095825	TRUE
PF00275	EPSP synthase (3-phosphoshikimate 1-carboxyvinyltransferase)	-0.238115	0.00446478	0.0164492	TRUE
PF00810	ER lumen protein retaining receptor	0.282949	0.000674656	0.00378143	TRUE
PF11838	ERAP1-like C-terminal domain	-0.304977	0.00023584	0.00168457	TRUE
PF16203	ERCC3/RAD25/XPB C-terminal helicase	-0.320082	0.00010918	0.000934559	TRUE
PF04716	ETC complex I subunit conserved region	-0.232007	0.00563516	0.0194635	TRUE
PF03124	EXS family	-0.312192	0.000164091	0.00128259	TRUE
PF00892	EamA-like transporter family	-0.23274	0.00548171	0.0191011	TRUE
PF02958	Ecdysteroid kinase-like family	-0.235897	0.00486185	0.0174628	TRUE
PF01132	Elongation factor P (EF-P) OB domain	-0.222539	0.007994	0.0254612	TRUE
PF09285	Elongation factor P, C-terminal	-0.285662	0.00059542	0.00344774	TRUE
PF02990	Endomembrane protein 70	0.242093	0.00382479	0.0147107	TRUE
PF01042	Endoribonuclease L-PSP	-0.245581	0.00333284	0.013189	TRUE
PF02130	Endoribonuclease YbeY	-0.247521	0.00308463	0.0123936	TRUE
PF01133	Enhancer of rudimentary	-0.217271	0.00965412	0.0295447	TRUE
PF13561	Enoyl-(Acyl carrier protein) reductase	-0.255621	0.00221854	0.00968435	TRUE
PF01222	Ergosterol biosynthesis ERG4/ERG24 family	0.269486	0.0012315	0.00605644	TRUE
PF04777	Erv1 / Alr family	-0.467953	4.88775e-09	4.52835e-07	TRUE
PF10503	Esterase PHB depolymerase	-0.41942	2.25797e-07	8.02067e-06	TRUE
PF03199	Eukaryotic glutathione synthase	-0.239307	0.00426359	0.0160527	TRUE
PF05346	Eukaryotic membrane protein family	0.289389	0.000500493	0.00303183	TRUE
PF05705	Eukaryotic protein of unknown function (DUF829)	-0.417962	2.51077e-07	8.59666e-06	TRUE
PF00194	Eukaryotic-type carbonic anhydrase	-0.55152	1.36482e-12	2.14959e-09	TRUE
PF00929	Exonuclease	-0.278279	0.000834139	0.00448838	TRUE
PF01494	FAD binding domain	-0.273617	0.00102715	0.00524396	TRUE
PF00667	FAD binding domain	-0.246079	0.0032675	0.0130122	TRUE
PF01565	FAD binding domain	0.283439	0.000659661	0.00371723	TRUE
PF03441	FAD binding domain of DNA photolyase	-0.247562	0.00307957	0.0123891	TRUE
PF06916	FAM210A/B-like domain	-0.309032	0.000192567	0.00142391	TRUE
PF04750	FAR-17a/AIG1-like protein	0.342762	3.17424e-05	0.000359672	TRUE
PF01846	FF domain	-0.367812	7.22447e-06	0.000109409	TRUE
PF01839	FG-GAP repeat	-0.32113	0.000103338	0.000894274	TRUE
PF13517	FG-GAP-like repeat	-0.267051	0.00136873	0.00661272	TRUE
PF00370	FGGY family of carbohydrate kinases, N-terminal domain	-0.245989	0.00327919	0.0130422	TRUE
PF08495	FIST N domain	0.239858	0.00417339	0.0157817	TRUE
PF00254	FKBP-type peptidyl-prolyl cis-trans isomerase	-0.303924	0.000248471	0.0017549	TRUE
PF08445	FR47-like protein	-0.254716	0.00230289	0.00993186	TRUE
PF07977	FabA-like domain	-0.228477	0.0064301	0.0215936	TRUE
PF17257	Family of unknown function (DUF5323)	-0.242434	0.00377404	0.0146047	TRUE
PF06905	Fas apoptotic inhibitory molecule (FAIM1)	0.223067	0.00784235	0.0252455	TRUE
PF04116	Fatty acid hydroxylase	-0.288959	0.000510686	0.00305873	TRUE
PF02657	Fe-S metabolism associated domain	-0.27574	0.000934677	0.00489889	TRUE
PF02943	Ferredoxin thioredoxin reductase catalytic beta chain	0.257808	0.00202599	0.00896249	TRUE
PF05996	Ferredoxin-dependent bilin reductase	-0.349838	2.11606e-05	0.000257358	TRUE
PF01269	Fibrillarin	0.257811	0.00202576	0.00896249	TRUE
PF00041	Fibronectin type III domain	-0.292055	0.000441381	0.00274231	TRUE
PF02661	Fic/DOC family	-0.371369	5.79522e-06	9.17334e-05	TRUE
PF11618	First C2 domain of RPGR-interacting protein 1	-0.350411	2.04685e-05	0.000250879	TRUE
PF14874	Flagellar-associated PapD-like	-0.222227	0.00808483	0.0256467	TRUE
PF01593	Flavin containing amine oxidoreductase	-0.300351	0.00029615	0.00199759	TRUE
PF00743	Flavin-binding monooxygenase-like	0.286415	0.000575013	0.00337927	TRUE
PF00258	Flavodoxin	-0.567305	2.22537e-13	7.00993e-10	TRUE
PF12641	Flavodoxin domain	-0.356271	1.45113e-05	0.000185815	TRUE
PF12724	Flavodoxin domain	-0.545728	2.59358e-12	2.31199e-09	TRUE
PF13287	Fn3 associated	-0.370263	6.20807e-06	9.63322e-05	TRUE
PF01226	Formate/nitrite transporter	0.419169	2.29964e-07	8.04875e-06	TRUE
PF07837	Formiminotransferase domain, N-terminal subdomain	-0.235603	0.00491679	0.0175425	TRUE
PF04961	Formiminotransferase-cyclodeaminase	-0.433101	8.13722e-08	3.62159e-06	TRUE
PF07078	Forty-two-three protein	0.390298	1.7148e-06	3.77737e-05	TRUE
PF01491	Frataxin-like domain	-0.245832	0.00329978	0.0131076	TRUE
PF03881	Fructosamine kinase	-0.406585	5.65051e-07	1.69515e-05	TRUE
PF00274	Fructose-bisphosphate aldolase class-I	-0.381173	3.11378e-06	5.90867e-05	TRUE
PF06480	FtsH Extracellular	0.223621	0.00768595	0.0248659	TRUE
PF03630	Fumble	-0.340257	3.65559e-05	0.00039983	TRUE
PF00172	Fungal Zn(2)-Cys(6) binuclear cluster domain	-0.249654	0.00283109	0.0116422	TRUE
PF08643	Fungal family of unknown function (DUF1776)	-0.337836	4.18554e-05	0.000442431	TRUE
PF06609	Fungal trichothecene efflux pump (TRI12)	-0.303239	0.000257021	0.00180718	TRUE
PF00503	G-protein alpha subunit	0.285856	0.000590103	0.0034359	TRUE
PF13185	GAF domain	-0.225733	0.00711526	0.0235679	TRUE
PF00320	GATA zinc finger	-0.40733	5.36308e-07	1.62439e-05	TRUE
PF07842	GC-rich sequence DNA-binding factor-like protein	-0.255397	0.00223912	0.00974204	TRUE
PF10250	GDP-fucose protein O-fucosyltransferase	-0.374465	4.77333e-06	7.93438e-05	TRUE
PF05351	GMP-PDE, delta subunit	0.303024	0.000259759	0.00181623	TRUE
PF08701	GNL3L/Grn1 putative GTPase	-0.229039	0.00629707	0.0212602	TRUE
PF01825	GPCR proteolysis site, GPS, motif	-0.252712	0.00250028	0.0106144	TRUE
PF02893	GRAM domain	0.253252	0.00244561	0.0104462	TRUE
PF01465	GRIP domain	-0.365301	8.42771e-06	0.000121777	TRUE
PF08885	GSCFA family	-0.383527	2.67415e-06	5.36534e-05	TRUE
PF00925	GTP cyclohydrolase II	-0.350126	2.08096e-05	0.000254071	TRUE
PF16360	GTP-binding GTPase Middle Region	-0.261786	0.00171425	0.00787156	TRUE
PF06421	GTP-binding protein LepA C-terminus	-0.23862	0.00437856	0.0162848	TRUE
PF08152	GUCT (NUC152) domain	-0.238238	0.0044437	0.0164099	TRUE
PF05419	GUN4-like	-0.264259	0.00154308	0.00720327	TRUE
PF02213	GYF domain	-0.311734	0.000167956	0.00129621	TRUE
PF10509	Galactokinase galactose-binding signature	-0.388	1.99609e-06	4.21993e-05	TRUE
PF02140	Galactose binding lectin domain	-0.341672	3.37581e-05	0.000376512	TRUE
PF13418	Galactose oxidase, central domain	-0.3485	2.28635e-05	0.000274885	TRUE
PF13415	Galactose oxidase, central domain	-0.374719	4.69763e-06	7.93438e-05	TRUE
PF03227	Gamma interferon inducible lysosomal thiol reductase (GILT)	-0.384335	2.5374e-06	5.19014e-05	TRUE
PF04130	Gamma tubulin complex component C-terminal	-0.241065	0.00398175	0.0151663	TRUE
PF00626	Gelsolin repeat	0.237422	0.00458558	0.0167182	TRUE
PF00042	Globin	0.30277	0.000263025	0.00182208	TRUE
PF00479	Glucose-6-phosphate dehydrogenase, NAD binding domain	-0.222585	0.00798061	0.0254443	TRUE
PF12999	Glucosidase II beta subunit-like	-0.293256	0.000416917	0.00261091	TRUE
PF07915	Glucosidase II beta subunit-like protein	-0.31384	0.00015084	0.0012029	TRUE
PF13015	Glucosidase II beta subunit-like protein	-0.23745	0.00458067	0.0167182	TRUE
PF00310	Glutamine amidotransferases class-II	-0.251306	0.00264772	0.0110322	TRUE
PF00462	Glutaredoxin	-0.321558	0.000101038	0.000889019	TRUE
PF04399	Glutaredoxin 2, C terminal domain	-0.219351	0.00896543	0.027769	TRUE
PF05768	Glutaredoxin-like domain (DUF836)	-0.353264	1.73274e-05	0.000216593	TRUE
PF13410	Glutathione S-transferase, C-terminal domain	-0.238876	0.0043355	0.0162003	TRUE
PF16865	Glutathione S-transferase, C-terminal domain	-0.337098	4.36084e-05	0.00045366	TRUE
PF13417	Glutathione S-transferase, N-terminal domain	-0.338069	4.13153e-05	0.000442431	TRUE
PF00255	Glutathione peroxidase	-0.287955	0.000535232	0.0031811	TRUE
PF04828	Glutathione-dependent formaldehyde-activating enzyme	0.313102	0.000156644	0.00123977	TRUE
PF03009	Glycerophosphoryl diester phosphodiesterase family	-0.389619	1.79369e-06	3.90869e-05	TRUE
PF12891	Glycoside hydrolase family 44	-0.321852	9.94883e-05	0.000879963	TRUE
PF00331	Glycosyl hydrolase family 10	0.23717	0.00463033	0.0168424	TRUE
PF03200	Glycosyl hydrolase family 63 C-terminal domain	-0.268815	0.00126797	0.0062064	TRUE
PF03662	Glycosyl hydrolase family 79, N-terminal domain	-0.403237	7.13324e-07	2.0427e-05	TRUE
PF03639	Glycosyl hydrolase family 81 N-terminal domain	-0.280986	0.000737923	0.00408516	TRUE
PF00295	Glycosyl hydrolases family 28	-0.285384	0.000603126	0.00346056	TRUE
PF07748	Glycosyl hydrolases family 38 C-terminal domain	-0.245293	0.00337124	0.0132742	TRUE
PF01074	Glycosyl hydrolases family 38 N-terminal domain	-0.331432	5.95511e-05	0.000589893	TRUE
PF04616	Glycosyl hydrolases family 43	-0.315447	0.000138894	0.00113937	TRUE
PF13704	Glycosyl transferase family 2	-0.332469	5.62775e-05	0.000559224	TRUE
PF09258	Glycosyl transferase family 64 domain	-0.266715	0.00138872	0.00669901	TRUE
PF00591	Glycosyl transferase family, a/b domain	-0.227729	0.00661067	0.0221057	TRUE
PF02885	Glycosyl transferase family, helical bundle domain	-0.288716	0.00051653	0.00308157	TRUE
PF00534	Glycosyl transferases group 1	0.265784	0.00144551	0.00686779	TRUE
PF04577	Glycosyltransferase 61	-0.243976	0.00355173	0.0138636	TRUE
PF04724	Glycosyltransferase family 17	-0.286577	0.000570702	0.00336021	TRUE
PF01697	Glycosyltransferase family 92	-0.435075	6.99713e-08	3.24132e-06	TRUE
PF13641	Glycosyltransferase like family 2	-0.244916	0.00342203	0.0134344	TRUE
PF04488	Glycosyltransferase sugar-binding region containing DXD motif	-0.328229	7.08342e-05	0.000672071	TRUE
PF10191	Golgi complex component 7 (COG7)	-0.458279	1.10138e-08	7.88489e-07	TRUE
PF04670	Gtr1/RagA G protein conserved region	0.272048	0.0011008	0.00553917	TRUE
PF02841	Guanylate-binding protein, C-terminal domain	-0.223026	0.00785414	0.0252455	TRUE
PF09778	Guanylylate cyclase	-0.309587	0.000187254	0.00139444	TRUE
PF13242	HAD-hyrolase-like	-0.319766	0.000111	0.000944998	TRUE
PF01966	HD domain	-0.222691	0.00795011	0.0254242	TRUE
PF13328	HD domain	-0.273265	0.00104326	0.00529191	TRUE
PF12765	HEAT repeat associated with sister chromatid cohesion	-0.417812	2.53826e-07	8.59734e-06	TRUE
PF00632	HECT-domain (ubiquitin-transferase)	0.227735	0.00660928	0.0221057	TRUE
PF01230	HIT domain	-0.255465	0.00223289	0.00972837	TRUE
PF00682	HMGL-like	-0.252516	0.00252038	0.0106566	TRUE
PF02301	HORMA domain	-0.391924	1.53891e-06	3.48386e-05	TRUE
PF00570	HRDC domain	-0.43888	5.21549e-08	2.5275e-06	TRUE
PF07529	HSA domain	-0.282026	0.000703749	0.00390972	TRUE
PF00447	HSF-type DNA-binding	0.222913	0.0078863	0.025323	TRUE
PF13344	Haloacid dehalogenase-like hydrolase	-0.277936	0.000847109	0.00453045	TRUE
PF13419	Haloacid dehalogenase-like hydrolase	-0.31767	0.000123808	0.00104556	TRUE
PF06825	Heat shock factor binding protein 1	-0.249206	0.00288266	0.0117621	TRUE
PF03457	Helicase associated domain	-0.266306	0.00141338	0.00678682	TRUE
PF14520	Helix-hairpin-helix domain	-0.296759	0.000352527	0.00227691	TRUE
PF00633	Helix-hairpin-helix motif	-0.240827	0.00401888	0.0152892	TRUE
PF12836	Helix-hairpin-helix motif	-0.325165	8.34717e-05	0.000764348	TRUE
PF08755	Hemimethylated DNA-binding protein YccV like	-0.248714	0.0029404	0.0119822	TRUE
PF14602	Hexapeptide repeat of succinyl-transferase	-0.335046	4.88519e-05	0.00050125	TRUE
PF03824	High-affinity nickel-transport protein	-0.313229	0.000155634	0.00123594	TRUE
PF01079	Hint module	-0.219516	0.00891267	0.0276873	TRUE
PF10017	Histidine-specific methyltransferase, SAM-dependent	-0.337086	4.36378e-05	0.00045366	TRUE
PF00815	Histidinol dehydrogenase	-0.364088	9.0747e-06	0.000129345	TRUE
PF08214	Histone acetylation protein	0.288873	0.000512738	0.00306475	TRUE
PF03652	Holliday junction resolvase	-0.289147	0.000506201	0.00304882	TRUE
PF05920	Homeobox KN domain	-0.238934	0.00432574	0.016198	TRUE
PF00046	Homeodomain	-0.346319	2.592e-05	0.000303702	TRUE
PF00742	Homoserine dehydrogenase	-0.259172	0.00191371	0.00857034	TRUE
PF03447	Homoserine dehydrogenase, NAD binding domain	-0.34427	2.91381e-05	0.000335469	TRUE
PF01430	Hsp33 protein	-0.242381	0.00378181	0.0146168	TRUE
PF12661	Human growth factor-like EGF	-0.348667	2.26441e-05	0.000274341	TRUE
PF16123	Hydroxyacylglutathione hydrolase C-terminus	-0.295123	0.000381347	0.00242676	TRUE
PF08540	Hydroxymethylglutaryl-coenzyme A synthase C terminal	-0.224787	0.00736624	0.0241996	TRUE
PF01154	Hydroxymethylglutaryl-coenzyme A synthase N terminal	-0.248418	0.00297554	0.0120785	TRUE
PF10718	Hypothetical chloroplast protein Ycf34	-0.365544	8.30363e-06	0.000120537	TRUE
PF05148	Hypothetical methyltransferase	-0.383654	2.65218e-06	5.35537e-05	TRUE
PF04588	Hypoxia induced protein conserved region	-0.237796	0.00452017	0.016595	TRUE
PF12436	ICP0-binding domain of Ubiquitin-specific protease 7	0.330259	6.34718e-05	0.000615189	TRUE
PF09597	IGR protein motif	-0.341666	3.37698e-05	0.000376512	TRUE
PF00612	IQ calmodulin-binding motif	0.272925	0.00105907	0.00534625	TRUE
PF00218	Indole-3-glycerol phosphate synthase	-0.222614	0.00797219	0.0254432	TRUE
PF01027	Inhibitor of apoptosis-promoting Bax1	0.278684	0.000819042	0.00444682	TRUE
PF16697	Inner membrane component of T3SS, cytoplasmic domain	-0.223802	0.00763568	0.0247453	TRUE
PF00459	Inositol monophosphatase family	-0.394295	1.31298e-06	3.08649e-05	TRUE
PF03741	Integral membrane protein TerC family	-0.278793	0.000815034	0.00443412	TRUE
PF16399	Intron-binding protein aquarius N-terminal	-0.217033	0.00973588	0.0297459	TRUE
PF00520	Ion transport protein	0.224569	0.00742506	0.0242287	TRUE
PF13685	Iron-containing alcohol dehydrogenase	-0.518055	4.73184e-11	2.26294e-08	TRUE
PF00465	Iron-containing alcohol dehydrogenase	-0.484139	1.18481e-09	1.69644e-07	TRUE
PF08007	JmjC domain	-0.224683	0.0073941	0.0242185	TRUE
PF01081	KDPG and KHG aldolase	-0.221229	0.00838133	0.026313	TRUE
PF13964	Kelch motif	-0.365882	8.13352e-06	0.000119166	TRUE
PF13854	Kelch motif	-0.313212	0.000155768	0.00123594	TRUE
PF01344	Kelch motif	-0.337425	4.28239e-05	0.00044965	TRUE
PF07646	Kelch motif	-0.330825	6.15538e-05	0.00059844	TRUE
PF02149	Kinase associated domain 1	0.293707	0.000408058	0.00256563	TRUE
PF14531	Kinase-like	0.338883	3.94821e-05	0.00042592	TRUE
PF07766	LETM1-like, RBD	-0.307664	0.000206264	0.00151101	TRUE
PF10601	LITAF-like zinc ribbon domain	-0.388025	1.99287e-06	4.21993e-05	TRUE
PF04455	LOR/SDH bifunctional enzyme conserved region	-0.255095	0.00226724	0.00982368	TRUE
PF03194	LUC7 N_terminus	-0.244181	0.00352303	0.0138007	TRUE
PF10282	Lactonase, 7-bladed beta-propeller	0.286216	0.000580324	0.0033915	TRUE
PF05011	Lariat debranching enzyme, C-terminal domain	-0.236967	0.00466659	0.0169157	TRUE
PF04366	Las17-binding protein actin regulator	-0.400691	8.50216e-07	2.25057e-05	TRUE
PF02450	Lecithin:cholesterol acyltransferase	-0.366143	8.00464e-06	0.000117825	TRUE
PF00059	Lectin C-type domain	-0.275194	0.000957718	0.005003	TRUE
PF01457	Leishmanolysin	-0.216675	0.00985976	0.030008	TRUE
PF04004	Leo1-like protein	-0.517344	5.08112e-11	2.26294e-08	TRUE
PF04072	Leucine carboxyl methyltransferase	-0.485614	1.03745e-09	1.5896e-07	TRUE
PF13603	Leucyl-tRNA synthetase, editing domain	-0.366438	7.86112e-06	0.000116804	TRUE
PF01764	Lipase (class 3)	0.229262	0.00624513	0.0211075	TRUE
PF06293	Lipopolysaccharide kinase (Kdo/WaaP) family	0.245717	0.00331488	0.0131344	TRUE
PF07692	Low iron-inducible periplasmic protein	-0.375596	4.44458e-06	7.65051e-05	TRUE
PF05834	Lycopene cyclase protein	-0.237376	0.00459371	0.0167285	TRUE
PF01476	LysM domain	-0.26318	0.00161578	0.00747389	TRUE
PF03067	Lytic polysaccharide mono-oxygenase, cellulose-degrading	-0.25134	0.00264407	0.0110316	TRUE
PF00629	MAM domain, meprin/A5/mu	-0.35105	1.97215e-05	0.000243619	TRUE
PF01124	MAPEG family	0.294331	0.000396076	0.00251034	TRUE
PF02142	MGS-like domain	0.297143	0.000346057	0.00226158	TRUE
PF03176	MMPL family	0.245182	0.00338612	0.0133162	TRUE
PF03476	MOSC N-terminal beta barrel domain	-0.381715	3.00685e-06	5.81078e-05	TRUE
PF03473	MOSC domain	-0.341683	3.37379e-05	0.000376512	TRUE
PF05063	MT-A70	0.222016	0.00814673	0.0258171	TRUE
PF01753	MYND finger	-0.251607	0.00261552	0.010956	TRUE
PF05711	Macrocin-O-methyltransferase (TylF)	-0.259945	0.00185263	0.00834877	TRUE
PF07109	Magnesium-protoporphyrin IX methyltransferase C-terminus	-0.244071	0.00353833	0.0138284	TRUE
PF13012	Maintenance of mitochondrial structure and function	0.31089	0.000175314	0.00132829	TRUE
PF02615	Malate/L-lactate dehydrogenase	-0.252538	0.00251813	0.0106566	TRUE
PF01232	Mannitol dehydrogenase Rossmann domain	-0.245335	0.00336557	0.0132685	TRUE
PF01575	MaoC like domain	-0.273096	0.0010511	0.00531867	TRUE
PF03819	MazG nucleotide pyrophosphohydrolase domain	-0.308149	0.000201309	0.0014816	TRUE
PF12643	MazG-like family	-0.291248	0.000458559	0.00282673	TRUE
PF00924	Mechanosensitive ion channel, beta-domain	-0.241386	0.00393222	0.0150322	TRUE
PF09773	Meckelin (Transmembrane protein 67)	0.228556	0.00641134	0.0215536	TRUE
PF02065	Melibiase	-0.346309	2.59352e-05	0.000303702	TRUE
PF10270	Membrane magnesium transporter	-0.377359	3.97455e-06	6.95545e-05	TRUE
PF02475	Met-10+ like-protein	-0.344935	2.80548e-05	0.000326098	TRUE
PF00753	Metallo-beta-lactamase superfamily	0.374558	4.74549e-06	7.93438e-05	TRUE
PF07021	Methionine biosynthesis protein MetW	-0.428959	1.11367e-07	4.49753e-06	TRUE
PF06838	Methionine gamma-lyase	-0.479944	1.72276e-09	2.17068e-07	TRUE
PF02219	Methylenetetrahydrofolate reductase	-0.238619	0.0043788	0.0162848	TRUE
PF16690	Methylmalonic aciduria and homocystinuria type C family	-0.332913	5.49271e-05	0.000551021	TRUE
PF05050	Methyltransferase FkbM domain	-0.268664	0.00127636	0.00622376	TRUE
PF08241	Methyltransferase domain	-0.235629	0.0049119	0.0175425	TRUE
PF13679	Methyltransferase domain	-0.277492	0.000864186	0.0045751	TRUE
PF05175	Methyltransferase small domain	-0.311936	0.000166245	0.00129024	TRUE
PF16187	Middle or third domain of peptidase_M16	-0.258077	0.00200336	0.00891324	TRUE
PF09739	Mini-chromosome maintenance replisome factor	-0.365555	8.29816e-06	0.000120537	TRUE
PF10558	Mitochondrial 18 KDa protein (MTP18)	-0.341574	3.39458e-05	0.000376512	TRUE
PF16053	Mitochondrial 28S ribosomal protein S34	-0.401715	7.92392e-07	2.20145e-05	TRUE
PF06984	Mitochondrial 39-S ribosomal protein L47 (MRP-L47)	-0.255702	0.00221108	0.00967347	TRUE
PF08213	Mitochondrial mRNA-processing protein COX24, C-terminal	-0.425378	1.45582e-07	5.66151e-06	TRUE
PF08561	Mitochondrial ribosomal protein L37	-0.328366	7.03139e-05	0.000672071	TRUE
PF02966	Mitosis protein DIM1	0.282808	0.000679024	0.00379242	TRUE
PF12631	MnmE helical domain	-0.264775	0.00150942	0.00708594	TRUE
PF03637	Mob1/phocein family	0.26619	0.00142045	0.00679854	TRUE
PF12804	MobA-like NTP transferase domain	-0.234547	0.0051188	0.0180968	TRUE
PF01568	Molydopterin dinucleotide binding domain	-0.238392	0.00441728	0.0163473	TRUE
PF01795	MraW methylase family	-0.321167	0.00010314	0.000894274	TRUE
PF06723	MreB/Mbl protein	-0.224997	0.00730977	0.0240604	TRUE
PF13234	Mtr4-like, beta-barrel domain	-0.351334	1.93972e-05	0.000240556	TRUE
PF07731	Multicopper oxidase	-0.321158	0.000103189	0.000894274	TRUE
PF03382	Mycoplasma protein of unknown function, DUF285	-0.358883	1.24222e-05	0.000165805	TRUE
PF01576	Myosin tail	0.233628	0.00530058	0.0186765	TRUE
PF00697	N-(5'phosphoribosyl)anthranilate (PRA) isomerase	-0.250614	0.0027232	0.0113018	TRUE
PF10358	N-terminal C2 in EEIG1 and EHBP1 proteins	-0.388793	1.89443e-06	4.08729e-05	TRUE
PF16880	N-terminal EH-domain containing protein	-0.251693	0.00260641	0.0109503	TRUE
PF14050	N-terminal conserved domain of Nudc.	-0.247583	0.003077	0.0123891	TRUE
PF10197	N-terminal domain of CBF1 interacting co-repressor CIR	-0.281654	0.000715806	0.0039697	TRUE
PF01849	NAC domain	0.274331	0.000995146	0.00514731	TRUE
PF05729	NACHT domain	-0.304347	0.000243321	0.00172626	TRUE
PF13450	NAD(P)-binding Rossmann-like domain	-0.242289	0.00379557	0.014652	TRUE
PF09296	NADH pyrophosphatase-like rudimentary NUDIX domain	-0.408169	5.05601e-07	1.54626e-05	TRUE
PF06522	NADH-ubiquinone reductase complex 1 MLRQ subunit	0.278604	0.000821989	0.00444682	TRUE
PF00499	NADH-ubiquinone/plastoquinone oxidoreductase chain 6	-0.32536	8.26073e-05	0.000758638	TRUE
PF03807	NADP oxidoreductase coenzyme F420-dependent	-0.311694	0.000168302	0.00129621	TRUE
PF03358	NADPH-dependent FMN reductase	-0.298748	0.000320184	0.00212333	TRUE
PF05833	NFACT N-terminal and middle domains	-0.485378	1.05973e-09	1.5896e-07	TRUE
PF05670	NFACT protein RNA binding domain	-0.490652	6.55882e-10	1.35861e-07	TRUE
PF01436	NHL repeat	-0.321316	0.000102336	0.000894274	TRUE
PF07978	NIPSNAP	-0.350659	2.01754e-05	0.000248251	TRUE
PF08154	NLE (NUC135) domain	-0.221939	0.00816932	0.0258627	TRUE
PF03031	NLI interacting factor-like phosphatase	0.404728	6.43229e-07	1.91148e-05	TRUE
PF09084	NMT1/THI5 like	-0.278256	0.000834982	0.00448838	TRUE
PF00293	NUDIX domain	-0.235474	0.00494105	0.0176067	TRUE
PF01936	NYN domain	-0.337927	4.16446e-05	0.000442431	TRUE
PF02690	Na+/Pi-cotransporter	0.471482	3.61113e-09	3.7778e-07	TRUE
PF01566	Natural resistance-associated macrophage protein-like	-0.298488	0.00032425	0.00214577	TRUE
PF02931	Neurotransmitter-gated ion-channel ligand binding domain	-0.359397	1.20453e-05	0.000162844	TRUE
PF01592	NifU-like N terminal domain	0.306429	0.000219398	0.0015924	TRUE
PF08376	Nitrate and nitrite sensing	-0.283066	0.000671043	0.00376789	TRUE
PF03460	Nitrite/Sulfite reductase ferredoxin-like half domain	-0.22272	0.00794158	0.0254227	TRUE
PF03060	Nitronate monooxygenase	-0.331137	6.05166e-05	0.000594007	TRUE
PF00881	Nitroreductase family	-0.284716	0.000622038	0.00353328	TRUE
PF03715	Noc2p family	0.249697	0.00282608	0.0116422	TRUE
PF08743	Nse4 C-terminal	-0.317551	0.000124576	0.00104923	TRUE
PF09751	Nuclear protein Es2	-0.247626	0.00307165	0.0123889	TRUE
PF09745	Nuclear speckle splicing regulatory protein 1, N-terminal	-0.347209	2.46294e-05	0.000292764	TRUE
PF04135	Nucleolar RNA-binding protein, Nop10p family	-0.316255	0.000133222	0.00111162	TRUE
PF07540	Nucleolar complex-associated protein	-0.32139	0.000101937	0.000894274	TRUE
PF00334	Nucleoside diphosphate kinase	-0.233544	0.00531735	0.0186875	TRUE
PF00956	Nucleosome assembly protein (NAP)	0.278217	0.000836449	0.00448861	TRUE
PF05889	O-phosphoseryl-tRNA(Sec) selenium transferase, SepSecS	-0.224171	0.00753363	0.0245154	TRUE
PF04756	OST3 / OST6 family, transporter family	0.249709	0.00282475	0.0116422	TRUE
PF01103	Omp85 superfamily domain	-0.265913	0.00143751	0.00685044	TRUE
PF04084	Origin recognition complex subunit 2	-0.395496	1.21093e-06	2.86798e-05	TRUE
PF00215	Orotidine 5'-phosphate decarboxylase / HUMPS family	-0.36101	1.09333e-05	0.000150393	TRUE
PF00175	Oxidoreductase NAD-binding domain	-0.24985	0.00280876	0.011611	TRUE
PF13872	P-loop containing NTP hydrolase pore-1	-0.307096	0.00021221	0.00154737	TRUE
PF00786	P21-Rho-binding domain	-0.285594	0.000597302	0.00345229	TRUE
PF08063	PADR1 domain, zinc ribbon fold	-0.304138	0.000245858	0.00174034	TRUE
PF01569	PAP2 superfamily	-0.398198	1.00823e-06	2.54075e-05	TRUE
PF13426	PAS domain	0.216586	0.00989082	0.0300734	TRUE
PF03130	PBS lyase HEAT-like repeat	-0.331071	6.07347e-05	0.000594007	TRUE
PF01399	PCI domain	0.287088	0.000557299	0.00328744	TRUE
PF07847	PCO_ADO	-0.391725	1.55944e-06	3.48386e-05	TRUE
PF03462	PCRF domain	-0.232304	0.00557262	0.0193023	TRUE
PF12705	PD-(D/E)XK nuclease superfamily	-0.381856	2.97963e-06	5.79373e-05	TRUE
PF07819	PGAP1-like protein	-0.225958	0.0070567	0.0233985	TRUE
PF00169	PH domain	0.233285	0.00536976	0.018836	TRUE
PF00628	PHD-finger	0.329564	6.59097e-05	0.000636814	TRUE
PF03660	PHF5-like protein	0.278979	0.000808204	0.00440457	TRUE
PF17146	PIN domain of ribonuclease	-0.234831	0.00506386	0.017963	TRUE
PF06201	PITH domain	0.375641	4.43197e-06	7.65051e-05	TRUE
PF13091	PLD-like domain	-0.311152	0.000172999	0.00131948	TRUE
PF08429	PLU-1-like protein	-0.277645	0.000858257	0.00457446	TRUE
PF00854	POT family	-0.361183	1.08201e-05	0.000149489	TRUE
PF00639	PPIC-type PPIASE domain	-0.246711	0.00318612	0.0127526	TRUE
PF13616	PPIC-type PPIASE domain	-0.230296	0.00600875	0.0205535	TRUE
PF13145	PPIC-type PPIASE domain	-0.315839	0.000136117	0.00112537	TRUE
PF05903	PPPDE putative peptidase domain	-0.445433	3.11798e-08	1.61011e-06	TRUE
PF04193	PQ loop repeat	-0.289985	0.000486668	0.00296519	TRUE
PF13360	PQQ-like domain	-0.432209	8.70963e-08	3.70748e-06	TRUE
PF03208	PRA1 family protein	-0.41226	3.7843e-07	1.2041e-05	TRUE
PF08082	PRO8NT (NUC069), PrP8 N-terminal domain	-0.216786	0.00982114	0.0299483	TRUE
PF06424	PRP1 splicing factor, N-terminal	-0.262862	0.00163775	0.00755331	TRUE
PF03371	PRP38 family	-0.419726	2.20807e-07	7.99472e-06	TRUE
PF04046	PSP	-0.253194	0.00245145	0.0104462	TRUE
PF04886	PT repeat	-0.44685	2.78572e-08	1.53948e-06	TRUE
PF01480	PWI domain	-0.220082	0.00873381	0.0272122	TRUE
PF00855	PWWP domain	-0.512181	8.47968e-11	2.96789e-08	TRUE
PF02671	Paired amphipathic helix repeat	-0.291665	0.000449599	0.00278787	TRUE
PF02089	Palmitoyl protein thioesterase	0.247811	0.00304904	0.0123292	TRUE
PF00112	Papain family cysteine protease	0.296704	0.000353463	0.00227691	TRUE
PF01734	Patatin-like phospholipase	-0.37312	5.19443e-06	8.47795e-05	TRUE
PF00805	Pentapeptide repeats (8 copies)	-0.378873	3.60879e-06	6.53315e-05	TRUE
PF00717	Peptidase S24-like	-0.371764	5.6544e-06	8.99563e-05	TRUE
PF10459	Peptidase S46	-0.510837	9.6754e-11	3.04775e-08	TRUE
PF01433	Peptidase family M1 domain	-0.25299	0.00247197	0.0105084	TRUE
PF01432	Peptidase family M3	-0.251086	0.00267154	0.0111167	TRUE
PF03572	Peptidase family S41	-0.386532	2.19816e-06	4.61613e-05	TRUE
PF01343	Peptidase family S49	-0.232463	0.00553915	0.0192586	TRUE
PF08496	Peptidase family S49 N-terminal	-0.336111	4.60619e-05	0.000475722	TRUE
PF01136	Peptidase family U32	-0.242811	0.00371856	0.0144254	TRUE
PF12222	Peptide N-acetyl-beta-D-glucosaminyl asparaginase amidase A	-0.274475	0.000988804	0.00513135	TRUE
PF01625	Peptide methionine sulfoxide reductase	-0.270525	0.00117686	0.00585643	TRUE
PF05048	Periplasmic copper-binding protein (NosD)	0.310454	0.000179223	0.0013506	TRUE
PF08041	PetM family of cytochrome b6f complex subunit 7	0.305466	0.000230178	0.00165918	TRUE
PF03742	PetN	0.305466	0.000230178	0.00165918	TRUE
PF04614	Pex19 protein family	-0.221619	0.0082642	0.0260969	TRUE
PF01384	Phosphate transporter family	0.315536	0.000138255	0.00113709	TRUE
PF00388	Phosphatidylinositol-specific phospholipase C, X domain	-0.270617	0.00117214	0.00584217	TRUE
PF01507	Phosphoadenosine phosphosulfate reductase family	-0.242168	0.00381362	0.0146857	TRUE
PF00311	Phosphoenolpyruvate carboxylase	0.250761	0.00270697	0.0112493	TRUE
PF13714	Phosphoenolpyruvate phosphomutase	-0.34418	2.9287e-05	0.000335469	TRUE
PF02878	Phosphoglucomutase/phosphomannomutase, alpha/beta/alpha domain I	-0.241676	0.00388784	0.0149238	TRUE
PF02880	Phosphoglucomutase/phosphomannomutase, alpha/beta/alpha domain III	-0.232347	0.00556357	0.0193009	TRUE
PF00162	Phosphoglycerate kinase	-0.299139	0.000314167	0.00209223	TRUE
PF02230	Phospholipase/Carboxylesterase	-0.265196	0.00148243	0.0069905	TRUE
PF04191	Phospholipid methyltransferase	-0.451717	1.8842e-08	1.18705e-06	TRUE
PF08543	Phosphomethylpyrimidine kinase	-0.2578	0.00202667	0.00896249	TRUE
PF00550	Phosphopantetheine attachment site	-0.27387	0.00101573	0.00521097	TRUE
PF01502	Phosphoribosyl-AMP cyclohydrolase	-0.289501	0.000497877	0.00302179	TRUE
PF01503	Phosphoribosyl-ATP pyrophosphohydrolase	-0.232286	0.00557621	0.0193023	TRUE
PF02843	Phosphoribosylglycinamide synthetase, C domain	-0.353793	1.67974e-05	0.000211647	TRUE
PF02844	Phosphoribosylglycinamide synthetase, N domain	-0.259151	0.0019154	0.00857034	TRUE
PF11947	Photosynthesis affected mutant 68	-0.396668	1.11864e-06	2.75289e-05	TRUE
PF14870	Photosynthesis system II assembly factor YCF48	-0.224782	0.00736744	0.0241996	TRUE
PF05023	Phytochelatin synthase	-0.234706	0.00508786	0.0180076	TRUE
PF02298	Plastocyanin-like domain	-0.26438	0.00153515	0.00718534	TRUE
PF03403	Platelet-activating factor acetylhydrolase, isoform II	-0.289019	0.00050924	0.00305873	TRUE
PF01437	Plexin repeat	0.217538	0.00956327	0.0293868	TRUE
PF05808	Podoplanin	-0.516111	5.74716e-11	2.26294e-08	TRUE
PF05028	Poly (ADP-ribose) glycohydrolase (PARG), Macro domain fold	-0.366623	7.77248e-06	0.000116035	TRUE
PF04928	Poly(A) polymerase central domain	0.300457	0.000294625	0.00199156	TRUE
PF00645	Poly(ADP-ribose) polymerase and DNA-Ligase Zn-finger region	-0.377475	3.94537e-06	6.95201e-05	TRUE
PF00644	Poly(ADP-ribose) polymerase catalytic domain	0.275834	0.000930775	0.00488657	TRUE
PF03364	Polyketide cyclase / dehydrase and lipid transport	-0.32369	9.02796e-05	0.000810201	TRUE
PF10604	Polyketide cyclase / dehydrase and lipid transport	-0.370692	6.04502e-06	9.47354e-05	TRUE
PF14765	Polyketide synthase dehydratase N-terminal domain	-0.219357	0.00896354	0.027769	TRUE
PF14667	Polysaccharide biosynthesis C-terminal domain	-0.315692	0.00013715	0.00113095	TRUE
PF03900	Porphobilinogen deaminase, C-terminal domain	-0.340335	3.63971e-05	0.00039948	TRUE
PF01379	Porphobilinogen deaminase, dipyromethane cofactor binding domain	-0.285033	0.000613003	0.00350446	TRUE
PF02541	Ppx/GppA phosphatase family	-0.300012	0.000301098	0.002018	TRUE
PF09820	Predicted AAA-ATPase	-0.401198	8.2106e-07	2.20145e-05	TRUE
PF02590	Predicted SPOUT methyltransferase	-0.306185	0.00022209	0.00160824	TRUE
PF09980	Predicted membrane protein (DUF2214)	-0.265026	0.00149331	0.00702077	TRUE
PF02996	Prefoldin subunit	0.365226	8.46664e-06	0.00012178	TRUE
PF00432	Prenyltransferase and squalene oxidase repeat	-0.277558	0.000861635	0.0045751	TRUE
PF00800	Prephenate dehydratase	-0.34007	3.69431e-05	0.000402667	TRUE
PF14447	Prokaryotic RING finger family 4	0.238367	0.00442156	0.0163473	TRUE
PF14464	Prokaryotic homologs of the JAB domain	-0.454748	1.47246e-08	9.663e-07	TRUE
PF00326	Prolyl oligopeptidase family	-0.424511	1.5526e-07	5.82224e-06	TRUE
PF02897	Prolyl oligopeptidase, N-terminal beta-propeller domain	-0.463747	6.97993e-09	5.63764e-07	TRUE
PF02252	Proteasome activator pa28 beta subunit	0.310096	0.000182504	0.00137205	TRUE
PF00227	Proteasome subunit	0.243109	0.00367523	0.0142979	TRUE
PF10584	Proteasome subunit A N-terminal signature	0.238772	0.00435295	0.0162355	TRUE
PF11833	Protein CHAPERONE-LIKE PROTEIN OF POR1-like	-0.373827	4.96876e-06	8.15187e-05	TRUE
PF15260	Protein family FAM219A	-0.252167	0.00255654	0.0107806	TRUE
PF00433	Protein kinase C terminal domain	0.302773	0.000262987	0.00182208	TRUE
PF00069	Protein kinase domain	0.430347	1.00296e-07	4.15701e-06	TRUE
PF06549	Protein of unknown function (DUF1118)	-0.230388	0.0059881	0.020525	TRUE
PF06658	Protein of unknown function (DUF1168)	-0.35932	1.21009e-05	0.000162896	TRUE
PF06842	Protein of unknown function (DUF1242)	-0.294218	0.000398214	0.00251883	TRUE
PF07082	Protein of unknown function (DUF1350)	-0.440956	4.43645e-08	2.21823e-06	TRUE
PF07103	Protein of unknown function (DUF1365)	-0.355864	1.48654e-05	0.000189579	TRUE
PF07209	Protein of unknown function (DUF1415)	-0.263808	0.0015731	0.00731945	TRUE
PF07386	Protein of unknown function (DUF1499)	-0.29099	0.000464179	0.00285041	TRUE
PF07671	Protein of unknown function (DUF1601)	-0.46341	7.1808e-09	5.65488e-07	TRUE
PF08578	Protein of unknown function (DUF1765)	-0.284271	0.00063491	0.00359706	TRUE
PF08856	Protein of unknown function (DUF1826)	-0.359826	1.17394e-05	0.000159393	TRUE
PF09366	Protein of unknown function (DUF1997)	-0.389572	1.79924e-06	3.90869e-05	TRUE
PF09418	Protein of unknown function (DUF2009)	-0.316416	0.000132116	0.00110682	TRUE
PF10698	Protein of unknown function (DUF2505)	-0.472071	3.43183e-09	3.72768e-07	TRUE
PF11027	Protein of unknown function (DUF2615)	-0.221354	0.00834355	0.0262463	TRUE
PF10841	Protein of unknown function (DUF2644)	0.283913	0.000645467	0.00365031	TRUE
PF10998	Protein of unknown function (DUF2838)	-0.35657	1.42563e-05	0.000183422	TRUE
PF11016	Protein of unknown function (DUF2854)	-0.228943	0.00631977	0.021314	TRUE
PF11460	Protein of unknown function (DUF3007)	-0.219795	0.00882399	0.0274389	TRUE
PF11255	Protein of unknown function (DUF3054)	-0.42373	1.64514e-07	6.02582e-06	TRUE
PF11805	Protein of unknown function (DUF3326)	-0.302148	0.000271201	0.00186119	TRUE
PF11902	Protein of unknown function (DUF3422)	-0.24574	0.00331183	0.0131344	TRUE
PF12159	Protein of unknown function (DUF3593)	-0.352269	1.8367e-05	0.00022868	TRUE
PF12239	Protein of unknown function (DUF3605)	-0.341636	3.38266e-05	0.000376512	TRUE
PF12263	Protein of unknown function (DUF3611)	-0.418356	2.43988e-07	8.44575e-06	TRUE
PF12359	Protein of unknown function (DUF3645)	-0.265721	0.00144938	0.00687581	TRUE
PF12527	Protein of unknown function (DUF3727)	-0.464223	6.70595e-09	5.55888e-07	TRUE
PF14015	Protein of unknown function (DUF4231)	-0.44924	2.30077e-08	1.34212e-06	TRUE
PF04483	Protein of unknown function (DUF565)	-0.297819	0.000334927	0.00219912	TRUE
PF05277	Protein of unknown function (DUF726)	-0.39567	1.19679e-06	2.85598e-05	TRUE
PF05421	Protein of unknown function (DUF751)	-0.217252	0.00966066	0.0295447	TRUE
PF05542	Protein of unknown function (DUF760)	-0.228219	0.0064919	0.0217779	TRUE
PF05608	Protein of unknown function (DUF778)	-0.337869	4.17794e-05	0.000442431	TRUE
PF06080	Protein of unknown function (DUF938)	-0.297775	0.000335646	0.00219912	TRUE
PF14811	Protein of unknown function TPD sequence-motif	-0.489166	7.5145e-10	1.39239e-07	TRUE
PF00481	Protein phosphatase 2C	0.270035	0.00120235	0.00594571	TRUE
PF01239	Protein prenyltransferase alpha subunit repeat	-0.254042	0.00236769	0.0101473	TRUE
PF04677	Protein similar to CwfJ C-terminus 1	-0.279871	0.000776229	0.00427469	TRUE
PF07714	Protein tyrosine and serine/threonine kinase	0.412646	3.68145e-07	1.18332e-05	TRUE
PF04387	Protein tyrosine phosphatase-like protein, PTPLA	-0.356891	1.39874e-05	0.000182067	TRUE
PF01135	Protein-L-isoaspartate(D-aspartate) O-methyltransferase (PCMT)	-0.332795	5.52816e-05	0.00055245	TRUE
PF02840	Prp18 domain	-0.324682	8.56433e-05	0.000777454	TRUE
PF08606	Prp19/Pso4-like	0.261678	0.00172206	0.00789589	TRUE
PF01789	PsbP	-0.222808	0.00791625	0.0253674	TRUE
PF04012	PspA/IM30 family	-0.254514	0.0023222	0.00999307	TRUE
PF01329	Pterin 4 alpha carbinolamine dehydratase	-0.326855	7.62606e-05	0.000714943	TRUE
PF00806	Pumilio-family RNA binding repeat	0.236637	0.00472608	0.0170724	TRUE
PF13759	Putative 2OG-Fe(II) oxygenase	-0.276434	0.000906159	0.00477324	TRUE
PF13241	Putative NAD(P)-binding	-0.254797	0.00229526	0.0099178	TRUE
PF01170	Putative RNA methylase family UPF0020	-0.219153	0.00902915	0.0278927	TRUE
PF02636	Putative S-adenosyl-L-methionine-dependent methyltransferase	-0.241268	0.00395035	0.0150832	TRUE
PF17004	Putative TPR-like repeat	-0.251394	0.00263834	0.0110222	TRUE
PF01866	Putative diphthamide synthesis protein	-0.222376	0.00804127	0.0255343	TRUE
PF00756	Putative esterase	-0.252566	0.0025152	0.0106566	TRUE
PF04657	Putative inner membrane exporter, YdcZ	-0.277906	0.000848255	0.00453045	TRUE
PF13883	Pyridoxamine 5'-phosphate oxidase	-0.270148	0.00119641	0.00593495	TRUE
PF12766	Pyridoxamine 5'-phosphate oxidase	-0.398953	9.57597e-07	2.50578e-05	TRUE
PF06865	Pyrimidine/purine nucleoside phosphorylase	-0.3578	1.32514e-05	0.000173203	TRUE
PF01470	Pyroglutamyl peptidase	0.238503	0.00439845	0.0163193	TRUE
PF14748	Pyrroline-5-carboxylate reductase dimerisation	-0.302149	0.000271184	0.00186119	TRUE
PF06508	Queuosine biosynthesis protein QueC	-0.32202	9.86135e-05	0.000875021	TRUE
PF08373	RAP domain	-0.371045	5.91358e-06	9.31389e-05	TRUE
PF16207	RAWUL domain RING finger- and WD40-associated ubiquitin-like	-0.452523	1.76506e-08	1.13468e-06	TRUE
PF02010	REJ domain	-0.321252	0.000102681	0.000894274	TRUE
PF00472	RF-1 domain	-0.216513	0.00991643	0.0301222	TRUE
PF12678	RING-H2 zinc finger domain	0.315329	0.000139743	0.00114335	TRUE
PF12906	RING-variant domain	-0.249465	0.00285269	0.0117005	TRUE
PF01137	RNA 3'-terminal phosphate cyclase	-0.225174	0.00726263	0.0239768	TRUE
PF09445	RNA cap guanine-N2 methyltransferase	-0.266414	0.00140682	0.00676565	TRUE
PF05971	RNA methyltransferase	-0.544597	2.93586e-12	2.31199e-09	TRUE
PF04452	RNA methyltransferase domain	-0.240474	0.00407471	0.0154829	TRUE
PF05179	RNA pol II accessory factor, Cdc73 family, C-terminal	-0.248624	0.00295107	0.0119993	TRUE
PF04998	RNA polymerase Rpb1, domain 5	0.374023	4.90799e-06	8.09433e-05	TRUE
PF01191	RNA polymerase Rpb5, C-terminal domain	0.325828	8.05692e-05	0.00074645	TRUE
PF00849	RNA pseudouridylate synthase	-0.251958	0.00257838	0.0108581	TRUE
PF16367	RNA recognition motif	-0.230241	0.00602118	0.0205535	TRUE
PF00773	RNB domain	-0.230195	0.00603153	0.020562	TRUE
PF04801	RPC5 protein	-0.384143	2.56923e-06	5.22133e-05	TRUE
PF08071	RS4NT (NUC023) domain	0.328293	7.05907e-05	0.000672071	TRUE
PF05773	RWD domain	-0.222873	0.00789784	0.0253342	TRUE
PF05691	Raffinose synthase or seed imbibition protein Sip1	-0.334598	5.0073e-05	0.000510452	TRUE
PF00071	Ras family	0.372831	5.2894e-06	8.54441e-05	TRUE
PF08477	Ras of Complex, Roc, domain of DAPkinase	0.361233	1.07876e-05	0.000149489	TRUE
PF03517	Regulator of volume decrease after cellular swelling	-0.244154	0.00352686	0.0138007	TRUE
PF00072	Response regulator receiver domain	0.380601	3.23041e-06	6.05702e-05	TRUE
PF03055	Retinal pigment epithelial membrane protein	-0.292228	0.000437772	0.00272995	TRUE
PF01858	Retinoblastoma-associated protein A domain	-0.273791	0.00101926	0.0052206	TRUE
PF00078	Reverse transcriptase (RNA-dependent DNA polymerase)	-0.26365	0.00158374	0.00734727	TRUE
PF04506	Rft protein	-0.470641	3.8824e-09	3.82174e-07	TRUE
PF01872	RibD C-terminal domain	-0.450214	2.12733e-08	1.31394e-06	TRUE
PF06026	Ribose 5-phosphate isomerase A (phosphoriboisomerase A)	-0.229768	0.00612858	0.0208478	TRUE
PF00861	Ribosomal L18 of archaea, bacteria, mitoch. and chloroplast	-0.221211	0.00838676	0.026313	TRUE
PF01776	Ribosomal L22e protein family	0.236402	0.00476879	0.0171873	TRUE
PF01777	Ribosomal L27e protein family	0.261079	0.0017662	0.0080621	TRUE
PF00831	Ribosomal L29 protein	0.295513	0.000374279	0.00239144	TRUE
PF01783	Ribosomal L32p protein family	-0.382644	2.83173e-06	5.61003e-05	TRUE
PF00832	Ribosomal L39 protein	-0.381427	3.06323e-06	5.84799e-05	TRUE
PF00900	Ribosomal family S4e	0.302721	0.000263667	0.00182208	TRUE
PF06325	Ribosomal protein L11 methyltransferase (PrmA)	-0.236733	0.00470865	0.017029	TRUE
PF01196	Ribosomal protein L17	-0.325516	8.1924e-05	0.000754563	TRUE
PF03939	Ribosomal protein L23, N-terminal domain	0.234094	0.0052077	0.0183904	TRUE
PF01198	Ribosomal protein L31e	0.274837	0.000973028	0.00506618	TRUE
PF01655	Ribosomal protein L32	0.289663	0.000494091	0.00300461	TRUE
PF00468	Ribosomal protein L34	-0.383231	2.72593e-06	5.43461e-05	TRUE
PF01632	Ribosomal protein L35	-0.286345	0.000576868	0.00338387	TRUE
PF05162	Ribosomal protein L41	0.314848	0.000143243	0.00116593	TRUE
PF00935	Ribosomal protein L44	0.23406	0.00521434	0.0183932	TRUE
PF00542	Ribosomal protein L7/L12 C-terminal domain	-0.264517	0.00152616	0.00715388	TRUE
PF16320	Ribosomal protein L7/L12 dimerisation domain	-0.237473	0.00457675	0.0167182	TRUE
PF03948	Ribosomal protein L9, C-terminal domain	-0.296776	0.000352226	0.00227691	TRUE
PF01281	Ribosomal protein L9, N-terminal domain	-0.293036	0.000421286	0.00263304	TRUE
PF00886	Ribosomal protein S16	-0.356559	1.42662e-05	0.000183422	TRUE
PF00203	Ribosomal protein S19	0.222488	0.00800864	0.025482	TRUE
PF01165	Ribosomal protein S21	-0.321067	0.00010368	0.000894776	TRUE
PF01200	Ribosomal protein S28e	-0.448713	2.40017e-08	1.3501e-06	TRUE
PF17067	Ribosomal protein S31e	-0.216943	0.00976702	0.0298121	TRUE
PF01250	Ribosomal protein S6	-0.255999	0.00218409	0.00956869	TRUE
PF01251	Ribosomal protein S7e	0.265475	0.00146477	0.00692797	TRUE
PF01775	Ribosomal proteins 50S-L18Ae/60S-L20/60S-L18A	0.257205	0.00207751	0.00913988	TRUE
PF02410	Ribosomal silencing factor during starvation	-0.236757	0.00470443	0.017029	TRUE
PF06624	Ribosome associated membrane protein RAMP4	-0.326629	7.71907e-05	0.000717259	TRUE
PF01765	Ribosome recycling factor	-0.276803	0.000891281	0.00470274	TRUE
PF02033	Ribosome-binding factor A	-0.315957	0.000135291	0.00112445	TRUE
PF13806	Rieske-like [2Fe-2S] domain	-0.229854	0.00610884	0.0208031	TRUE
PF13229	Right handed beta helix region	0.288956	0.000510759	0.00305873	TRUE
PF13639	Ring finger domain	0.259328	0.00190122	0.00853216	TRUE
PF00301	Rubredoxin	-0.283245	0.000665584	0.00374391	TRUE
PF05221	S-adenosyl-L-homocysteine hydrolase	-0.247311	0.00311069	0.0124824	TRUE
PF00670	S-adenosyl-L-homocysteine hydrolase, NAD binding domain	-0.26103	0.00176987	0.0080621	TRUE
PF02675	S-adenosylmethionine decarboxylase	-0.33825	4.09013e-05	0.000439724	TRUE
PF02773	S-adenosylmethionine synthetase, C-terminal domain	-0.261019	0.00177067	0.0080621	TRUE
PF00438	S-adenosylmethionine synthetase, N-terminal domain	-0.264252	0.00154356	0.00720327	TRUE
PF02772	S-adenosylmethionine synthetase, central domain	-0.255608	0.00221971	0.00968435	TRUE
PF10672	S-adenosylmethionine-dependent methyltransferase	-0.332749	5.54204e-05	0.00055245	TRUE
PF00575	S1 RNA binding domain	-0.233255	0.00537585	0.0188364	TRUE
PF01479	S4 domain	0.221497	0.00830065	0.0261732	TRUE
PF02182	SAD/SRA domain	-0.432742	8.36296e-08	3.62159e-06	TRUE
PF03492	SAM dependent carboxyl methyltransferase	-0.273498	0.00103255	0.00526301	TRUE
PF00536	SAM domain (Sterile alpha motif)	-0.301175	0.000284466	0.00194375	TRUE
PF02037	SAP domain	-0.358648	1.25972e-05	0.000166727	TRUE
PF02036	SCP-2 sterol transfer family	0.216281	0.00999802	0.0303408	TRUE
PF05285	SDA1, conserved domain	0.21742	0.00960316	0.029426	TRUE
PF06705	SF-assemblin/beta giardin	-0.267982	0.0013147	0.00638107	TRUE
PF04908	SH3-binding, glutamic acid-rich protein	-0.424877	1.51106e-07	5.80468e-06	TRUE
PF08450	SMP-30/Gluconolactonase/LRE-like region	-0.312836	0.000158786	0.00125044	TRUE
PF05739	SNARE domain	0.288643	0.000518287	0.00308621	TRUE
PF00176	SNF2-related domain	-0.238928	0.0043267	0.016198	TRUE
PF04855	SNF5 / SMARCB1 / INI1	-0.402026	7.75557e-07	2.18125e-05	TRUE
PF01174	SNO glutamine amidotransferase family	-0.230864	0.00588231	0.0202064	TRUE
PF01680	SOR/SNZ family	-0.377189	4.01778e-06	6.99227e-05	TRUE
PF04832	SOUL heme-binding protein	-0.39784	1.0331e-06	2.58276e-05	TRUE
PF01145	SPFH domain / Band 7 family	0.235651	0.00490788	0.0175425	TRUE
PF00448	SRP54-type protein, GTPase domain	0.234771	0.00507528	0.0179833	TRUE
PF01740	STAS domain	0.24305	0.00368372	0.0143079	TRUE
PF01458	SUF system FeS cluster assembly, SufBD	-0.248614	0.0029522	0.0119993	TRUE
PF02201	SWIB/MDM2 domain	-0.347017	2.49021e-05	0.000294894	TRUE
PF03435	Saccharopine dehydrogenase NADP binding domain	-0.427111	1.27926e-07	5.0371e-06	TRUE
PF05184	Saposin-like type B, region 1	-0.253169	0.00245402	0.0104462	TRUE
PF03489	Saposin-like type B, region 2	-0.233588	0.00530868	0.0186842	TRUE
PF05992	SbmA/BacA-like family	-0.331112	6.06007e-05	0.000594007	TRUE
PF00530	Scavenger receptor cysteine-rich domain	-0.311929	0.000166298	0.00129024	TRUE
PF07517	SecA DEAD-like domain	-0.224059	0.00756458	0.0245665	TRUE
PF07516	SecA Wing and Scaffold domain	-0.235286	0.0049768	0.0176941	TRUE
PF00584	SecE/Sec61-gamma subunits of protein translocation complex	-0.479483	1.79458e-09	2.17421e-07	TRUE
PF00344	SecY	0.282826	0.00067848	0.00379242	TRUE
PF10591	Secreted protein acidic and rich in cysteine Ca binding region	0.232062	0.00562363	0.0194451	TRUE
PF08238	Sel1 repeat	-0.259325	0.00190145	0.00853216	TRUE
PF08806	Sep15/SelM redox domain	-0.26625	0.00141679	0.00679285	TRUE
PF00735	Septin	0.379592	3.44658e-06	6.37023e-05	TRUE
PF12146	Serine aminopeptidase, S33	-0.296724	0.000353112	0.00227691	TRUE
PF05577	Serine carboxypeptidase S28	-0.354923	1.57154e-05	0.00019881	TRUE
PF01972	Serine dehydrogenase proteinase	-0.297064	0.000347372	0.00226281	TRUE
PF00079	Serpin (serine protease inhibitor)	-0.492786	5.38846e-10	1.30567e-07	TRUE
PF08501	Shikimate dehydrogenase substrate binding domain	-0.265042	0.00149224	0.00702077	TRUE
PF01202	Shikimate kinase	-0.273726	0.00102221	0.00522722	TRUE
PF09032	Siah interacting protein, N terminal	-0.271836	0.0011111	0.00557317	TRUE
PF02482	Sigma 54 modulation protein / S30EA ribosomal protein	-0.238569	0.00438731	0.0162972	TRUE
PF04542	Sigma-70 region 2	-0.284834	0.000618653	0.00352576	TRUE
PF04539	Sigma-70 region 3	-0.2356	0.00491747	0.0175425	TRUE
PF04545	Sigma-70, region 4	-0.30359	0.000252606	0.00178011	TRUE
PF04573	Signal peptidase subunit	-0.217841	0.00946091	0.0291034	TRUE
PF10502	Signal peptidase, peptidase S26	-0.386021	2.27303e-06	4.72643e-05	TRUE
PF09439	Signal recognition particle receptor beta subunit	0.231119	0.00582642	0.0200582	TRUE
PF08295	Sin3 family co-repressor	-0.22242	0.00802828	0.0255188	TRUE
PF12830	Sister chromatid cohesion C-terminus	-0.34633	2.59039e-05	0.000303702	TRUE
PF01466	Skp1 family, dimerisation domain	0.297765	0.000335803	0.00219912	TRUE
PF03931	Skp1 family, tetramerisation domain	0.29908	0.000315072	0.00209383	TRUE
PF01713	Smr domain	-0.260473	0.00181195	0.00820065	TRUE
PF14619	Snf2-ATP coupling, chromatin remodelling complex	-0.379576	3.44997e-06	6.37023e-05	TRUE
PF13474	SnoaL-like domain	-0.290011	0.000486075	0.00296519	TRUE
PF12680	SnoaL-like domain	-0.375261	4.53965e-06	7.77169e-05	TRUE
PF01699	Sodium/calcium exchanger protein	0.254383	0.00233466	0.010033	TRUE
PF00939	Sodium:sulfate symporter transmembrane region	-0.337332	4.30462e-05	0.000450484	TRUE
PF14772	Sperm tail	0.445479	3.10647e-08	1.61011e-06	TRUE
PF14775	Sperm tail C-terminal domain	0.433541	7.86874e-08	3.59225e-06	TRUE
PF08557	Sphingolipid Delta4-desaturase (DES)	-0.392049	1.52613e-06	3.48386e-05	TRUE
PF07189	Splicing factor 3B subunit 10 (SF3b10)	-0.245419	0.00335438	0.0132483	TRUE
PF06468	Spondin_N	-0.274597	0.000983486	0.00511218	TRUE
PF06093	Spt4/RpoE2 zinc finger	-0.372647	5.35067e-06	8.5993e-05	TRUE
PF13243	Squalene-hopene cyclase C-terminal domain	-0.292192	0.000438525	0.00272995	TRUE
PF13249	Squalene-hopene cyclase N-terminal domain	-0.285159	0.000609422	0.00349032	TRUE
PF00494	Squalene/phytoene synthase	-0.225028	0.00730141	0.024058	TRUE
PF07228	Stage II sporulation protein E (SpoIIE)	-0.233167	0.0053939	0.0188786	TRUE
PF04232	Stage V sporulation protein S (SpoVS)	0.367514	7.35847e-06	0.000110377	TRUE
PF17101	Stealth protein CR1, conserved region 1	-0.300055	0.000300467	0.002018	TRUE
PF11380	Stealth protein CR2, conserved region 2	-0.487898	8.43505e-10	1.39844e-07	TRUE
PF07712	Stress up-regulated Nod 19	0.274383	0.000992875	0.00514401	TRUE
PF13541	Subunit ChlI of Mg-chelatase	0.247891	0.00303917	0.0123051	TRUE
PF04952	Succinylglutamate desuccinylase / Aspartoacylase family	-0.359841	1.17293e-05	0.000159393	TRUE
PF05116	Sucrose-6F-phosphate phosphohydrolase	-0.227019	0.00678652	0.0226414	TRUE
PF00884	Sulfatase	-0.268912	0.00126266	0.00619531	TRUE
PF01925	Sulfite exporter TauE/SafE	0.309662	0.000186547	0.00139247	TRUE
PF13469	Sulfotransferase family	-0.314265	0.00014759	0.0011861	TRUE
PF04143	Sulphur transport	0.42844	1.15793e-07	4.61705e-06	TRUE
PF05477	Surfeit locus protein 2 (SURF2)	-0.305041	0.000235095	0.00168307	TRUE
PF10474	Syndetin, C-terminal	-0.247649	0.00306891	0.0123889	TRUE
PF00804	Syntaxin	0.268764	0.00127083	0.0062064	TRUE
PF09177	Syntaxin 6, N-terminal	0.286292	0.000578296	0.00338593	TRUE
PF14523	Syntaxin-like protein	-0.456572	1.26785e-08	8.49726e-07	TRUE
PF03134	TB2/DP1, HVA22 family	-0.410735	4.21774e-07	1.30254e-05	TRUE
PF00118	TCP-1/cpn60 chaperonin family	0.273947	0.00101226	0.00520168	TRUE
PF03070	TENA/THI-4/PQQC family	-0.24967	0.00282926	0.0116422	TRUE
PF08711	TFIIS helical bundle-like domain	-0.402869	7.31737e-07	2.07655e-05	TRUE
PF16134	THO complex subunit 2 N-terminus	-0.249338	0.00286733	0.0117254	TRUE
PF06068	TIP49 P-loop domain	0.239948	0.00415889	0.0157648	TRUE
PF03798	TLC domain	-0.395863	1.18124e-06	2.84039e-05	TRUE
PF07534	TLD	-0.327851	7.22902e-05	0.000679744	TRUE
PF04765	TOD1/MUCI70, glycosyltransferase-like domain	-0.331029	6.08722e-05	0.000594007	TRUE
PF04536	TPM domain	-0.41937	2.26616e-07	8.02067e-06	TRUE
PF01938	TRAM domain	-0.224057	0.00756492	0.0245665	TRUE
PF02668	Taurine catabolism dioxygenase TauD, TfdA family	-0.249973	0.00279479	0.0115684	TRUE
PF03645	Tctex-1 family	0.275041	0.000964232	0.00502869	TRUE
PF03848	Tellurite resistance protein TehB	-0.482587	1.36163e-09	1.78812e-07	TRUE
PF01300	Telomere recombination	-0.254827	0.00229238	0.0099178	TRUE
PF03638	Tesmin/TSO1-like CXC domain, cysteine-rich domain	-0.241562	0.00390521	0.0149652	TRUE
PF00335	Tetraspanin family	-0.218855	0.00912548	0.028154	TRUE
PF12688	Tetratrico peptide repeat	-0.23796	0.00449167	0.0165289	TRUE
PF13431	Tetratricopeptide repeat	-0.32902	6.78745e-05	0.000651844	TRUE
PF07721	Tetratricopeptide repeat	-0.250568	0.00272828	0.011308	TRUE
PF07720	Tetratricopeptide repeat	-0.278602	0.000822086	0.00444682	TRUE
PF13174	Tetratricopeptide repeat	0.309117	0.000191739	0.00142391	TRUE
PF16921	Tex protein YqgF-like domain	-0.286122	0.000582867	0.00340005	TRUE
PF01946	Thi4 family	-0.312936	0.000157978	0.0012472	TRUE
PF00899	ThiF family	0.269468	0.00123244	0.00605644	TRUE
PF02597	ThiS family	-0.411335	4.04195e-07	1.26061e-05	TRUE
PF02581	Thiamine monophosphate synthase	-0.456736	1.25086e-08	8.49726e-07	TRUE
PF05690	Thiazole biosynthesis protein ThiG	-0.324863	8.48251e-05	0.000772251	TRUE
PF03061	Thioesterase superfamily	-0.392544	1.47646e-06	3.44508e-05	TRUE
PF13279	Thioesterase-like superfamily	-0.260094	0.00184107	0.00832049	TRUE
PF02803	Thiolase, C-terminal domain	0.251653	0.00261069	0.0109503	TRUE
PF00108	Thiolase, N-terminal domain	0.315179	0.000140819	0.00114917	TRUE
PF05724	Thiopurine S-methyltransferase (TPMT)	-0.307769	0.000205184	0.0015066	TRUE
PF04278	Tic22-like family	-0.31083	0.000175848	0.00132835	TRUE
PF14249	Tocopherol cyclase	-0.241523	0.00391112	0.0149697	TRUE
PF01751	Toprim domain	-0.260058	0.00184385	0.00832108	TRUE
PF05129	Transcription elongation factor Elf1 like	-0.320011	0.000109585	0.00093548	TRUE
PF07500	Transcription factor S-II (TFIIS), central domain	-0.331018	6.09092e-05	0.000594007	TRUE
PF00382	Transcription factor TFIIB repeat	-0.307168	0.000211451	0.00154541	TRUE
PF00352	Transcription factor TFIID (or TATA-binding protein, TBP)	0.229689	0.00614663	0.0208641	TRUE
PF10163	Transcription factor e(y)2	0.311519	0.000169799	0.00130455	TRUE
PF02291	Transcription initiation factor IID, 31kD subunit	-0.304772	0.000238254	0.00169797	TRUE
PF03540	Transcription initiation factor TFIID 23-30kDa subunit	-0.267715	0.00132995	0.00644512	TRUE
PF14304	Transcription termination and cleavage factor C-terminal	-0.401453	8.06793e-07	2.20145e-05	TRUE
PF02357	Transcription termination factor nusG	-0.443387	3.66542e-08	1.86227e-06	TRUE
PF11732	Transcription- and export-related complex subunit	-0.221606	0.00826818	0.0260969	TRUE
PF04910	Transcriptional repressor TCF25	-0.223612	0.00768868	0.0248659	TRUE
PF01841	Transglutaminase-like superfamily	-0.257624	0.00204161	0.00900712	TRUE
PF13369	Transglutaminase-like superfamily	-0.284698	0.00062253	0.00353328	TRUE
PF01176	Translation initiation factor 1A / IF-1	0.265257	0.00147857	0.00698276	TRUE
PF01253	Translation initiation factor SUI1	0.240051	0.00414229	0.0157207	TRUE
PF03839	Translocation protein Sec62	-0.270431	0.0011817	0.00587122	TRUE
PF10269	Transmembrane Fragile-X-F protein	-0.271568	0.00112429	0.00562143	TRUE
PF04148	Transmembrane adaptor Erv26	-0.225411	0.00719985	0.023798	TRUE
PF05977	Transmembrane secretion effector	0.232749	0.00547978	0.0191011	TRUE
PF13868	Trichohyalin-plectin-homology domain	0.279067	0.000805006	0.00440238	TRUE
PF12580	Tripeptidyl peptidase II	-0.490097	6.90089e-10	1.35861e-07	TRUE
PF02254	TrkA-N domain	-0.333343	5.3647e-05	0.000541628	TRUE
PF03966	Trm112p-like protein	0.219361	0.00896227	0.027769	TRUE
PF00290	Tryptophan synthase alpha chain	-0.38597	2.28069e-06	4.72643e-05	TRUE
PF03222	Tryptophan/tyrosine permease family	-0.224675	0.00739625	0.0242185	TRUE
PF01167	Tub family	0.314384	0.000146691	0.00118482	TRUE
PF03953	Tubulin C-terminal domain	0.237757	0.00452685	0.0166002	TRUE
PF07986	Tubulin binding cofactor C	-0.253173	0.0024536	0.0104462	TRUE
PF01663	Type I phosphodiesterase / nucleotide pyrophosphatase	-0.283867	0.000646819	0.0036514	TRUE
PF13350	Tyrosine phosphatase family	-0.404348	6.60417e-07	1.94422e-05	TRUE
PF03162	Tyrosine phosphatase family	-0.299502	0.000308664	0.00205994	TRUE
PF06220	U1 zinc finger	-0.358775	1.25025e-05	0.000166173	TRUE
PF00789	UBX domain	0.344703	2.84282e-05	0.000329224	TRUE
PF01040	UbiA prenyltransferase family	-0.300749	0.000290457	0.00197185	TRUE
PF13423	Ubiquitin carboxyl-terminal hydrolase	0.237118	0.00463955	0.0168467	TRUE
PF11976	Ubiquitin-2 like Rad60 SUMO-like	0.258849	0.0019398	0.00866717	TRUE
PF00179	Ubiquitin-conjugating enzyme	0.348511	2.28494e-05	0.000274885	TRUE
PF04110	Ubiquitin-like autophagy protein Apg12	0.225149	0.00726915	0.0239768	TRUE
PF14560	Ubiquitin-like domain	0.333449	5.33372e-05	0.000540232	TRUE
PF14533	Ubiquitin-specific protease C-terminal	0.325713	8.10676e-05	0.000748865	TRUE
PF12344	Ultra-violet resistance protein B	-0.478201	2.00989e-09	2.34487e-07	TRUE
PF05664	Unc-13 homolog	-0.369624	6.45934e-06	9.92533e-05	TRUE
PF02694	Uncharacterised BCR, YnfA/UPF0060 family	-0.282382	0.000692418	0.00385356	TRUE
PF06779	Uncharacterised MFS-type transporter YbfB	-0.503033	2.05817e-10	5.4027e-08	TRUE
PF03665	Uncharacterised protein family (UPF0172)	-0.280661	0.000748897	0.00413864	TRUE
PF02622	Uncharacterized ACR, COG1678	-0.374933	4.63473e-06	7.89156e-05	TRUE
PF10260	Uncharacterized conserved domain (SAYSvFN)	-0.218653	0.00919162	0.0283303	TRUE
PF10184	Uncharacterized conserved protein (DUF2358)	-0.31136	0.000171182	0.00131198	TRUE
PF00919	Uncharacterized protein family UPF0004	-0.33798	4.15206e-05	0.000442431	TRUE
PF01205	Uncharacterized protein family UPF0029	-0.303002	0.000260039	0.00181623	TRUE
PF03253	Urea transporter	-0.260597	0.00180251	0.00818141	TRUE
PF07168	Ureide permease	-0.226995	0.00679241	0.0226414	TRUE
PF02602	Uroporphyrinogen-III synthase HemD	-0.269727	0.00121861	0.00601386	TRUE
PF02151	UvrB/uvrC motif	-0.347756	2.38656e-05	0.00028476	TRUE
PF13361	UvrD-like helicase C-terminal domain	-0.224234	0.00751638	0.0244846	TRUE
PF13538	UvrD-like helicase C-terminal domain	-0.235852	0.00487031	0.0174732	TRUE
PF07137	VDE lipocalin domain	-0.246249	0.00324539	0.0129405	TRUE
PF01847	VHL beta domain	-0.367718	7.26663e-06	0.000109521	TRUE
PF09359	VTC domain	0.220201	0.00869662	0.0271769	TRUE
PF12755	Vacuolar 14 Fab1-binding region	0.308309	0.000199691	0.00147313	TRUE
PF03635	Vacuolar protein sorting-associated protein 35	-0.224601	0.00741642	0.0242287	TRUE
PF02204	Vacuolar sorting protein 9 (VPS9) domain	-0.239296	0.00426542	0.0160527	TRUE
PF10475	Vacuolar-sorting protein 54, of GARP complex	-0.230259	0.00601719	0.0205535	TRUE
PF10458	Valyl tRNA synthetase tRNA binding arm	-0.401284	8.16219e-07	2.20145e-05	TRUE
PF14604	Variant SH3 domain	-0.243099	0.0036766	0.0142979	TRUE
PF05008	Vesicle transport v-SNARE protein N-terminus	-0.239896	0.00416727	0.0157775	TRUE
PF05090	Vitamin K-dependent gamma-carboxylase	-0.377895	3.84111e-06	6.87471e-05	TRUE
PF04840	Vps16, C-terminal region	0.223032	0.00785236	0.0252455	TRUE
PF04494	WD40 associated region in TFIID subunit, NTD2 domain	-0.310878	0.000175419	0.00132829	TRUE
PF07676	WD40-like Beta Propeller Repeat	-0.300814	0.000289531	0.00196981	TRUE
PF00458	WHEP-TRS domain	-0.289269	0.000503315	0.00304308	TRUE
PF00397	WW domain	-0.279003	0.000807335	0.00440457	TRUE
PF15613	Williams-Beuren syndrome DDT (WSD), D-TOX E motif	-0.343207	3.09513e-05	0.000351973	TRUE
PF02129	X-Pro dipeptidyl-peptidase (S15 family)	-0.372942	5.25282e-06	8.52906e-05	TRUE
PF09302	XLF-Cernunnos, XRcc4-like factor, NHEJ component	0.302713	0.000263767	0.00182208	TRUE
PF05181	XPA protein C-terminus	-0.457043	1.21968e-08	8.49726e-07	TRUE
PF03795	YCII-related domain	-0.229445	0.00620267	0.021009	TRUE
PF03878	YIF1	-0.266587	0.00139635	0.00672555	TRUE
PF08265	YL1 nuclear protein C-terminal domain	-0.246438	0.00322114	0.0128601	TRUE
PF05658	YadA head domain repeat (2 copies)	-0.432695	8.39289e-08	3.62159e-06	TRUE
PF04794	YdjC-like protein	-0.285721	0.000593798	0.00344469	TRUE
PF04893	Yip1 domain	0.218047	0.00939183	0.0289191	TRUE
PF03853	YjeF-related protein N-terminus	-0.344194	2.92633e-05	0.000335469	TRUE
PF14588	YjgF/chorismate_mutase-like, putative endoribonuclease	-0.276917	0.000886762	0.00468675	TRUE
PF08571	Yos1-like	-0.41521	3.06358e-07	1.00524e-05	TRUE
PF09424	Yqey-like protein	-0.411468	4.00372e-07	1.26061e-05	TRUE
PF14145	YrhK-like protein	-0.439865	4.8307e-08	2.37761e-06	TRUE
PF02535	ZIP Zinc transporter	-0.324087	8.83991e-05	0.000795592	TRUE
PF11977	Zc3h12a-like Ribonuclease NYN domain	-0.324402	8.69297e-05	0.000784781	TRUE
PF06414	Zeta toxin	0.265611	0.00145629	0.0068982	TRUE
PF13923	Zinc finger, C3HC4 type (RING finger)	0.24792	0.00303568	0.0123051	TRUE
PF00097	Zinc finger, C3HC4 type (RING finger)	0.254696	0.00230482	0.00993186	TRUE
PF13696	Zinc knuckle	-0.359114	1.22513e-05	0.000164219	TRUE
PF00107	Zinc-binding dehydrogenase	-0.398757	9.70493e-07	2.50578e-05	TRUE
PF13602	Zinc-binding dehydrogenase	-0.295256	0.000378932	0.00241627	TRUE
PF10276	Zinc-finger domain	-0.392424	1.48844e-06	3.44748e-05	TRUE
PF11789	Zinc-finger of the MIZ type in Nse subunit	-0.25729	0.00207014	0.00912019	TRUE
PF00641	Zn-finger in Ran binding protein and others	-0.221158	0.00840268	0.0263368	TRUE
PF00561	alpha/beta hydrolase fold	-0.413052	3.5762e-07	1.16134e-05	TRUE
PF14845	beta-acetyl hexosaminidase like	-0.230902	0.00587399	0.0201999	TRUE
PF00056	lactate/malate dehydrogenase, NAD binding domain	0.261256	0.00175311	0.00802658	TRUE
PF02866	lactate/malate dehydrogenase, alpha/beta C-terminal domain	0.29466	0.000389904	0.00247621	TRUE
PF00538	linker histone H1 and H5 family	-0.2201	0.0087283	0.0272122	TRUE
PF02536	mTERF	-0.277593	0.000860265	0.0045751	TRUE
PF02416	mttA/Hcf106 family	-0.322688	9.51957e-05	0.000847081	TRUE
PF00294	pfkB family carbohydrate kinase	-0.239261	0.00427123	0.0160553	TRUE
PF04696	pinin/SDK/memA/ protein conserved region	-0.296993	0.000348563	0.00226386	TRUE
PF02527	rRNA small subunit methyltransferase G	-0.33603	4.62684e-05	0.000476293	TRUE
PF10153	rRNA-processing protein Efg1	-0.231672	0.00570667	0.0196674	TRUE
PF03054	tRNA methyl transferase HUP domain	-0.417469	2.60223e-07	8.69149e-06	TRUE
PF13932	tRNA modifying enzyme MnmG/GidA C-terminal helical bundle	-0.225473	0.00718332	0.0237683	TRUE
PF01142	tRNA pseudouridine synthase D (TruD)	-0.309043	0.000192453	0.00142391	TRUE
PF09334	tRNA synthetases class I (M)	-0.22183	0.00820158	0.0259387	TRUE
PF01980	tRNA-methyltransferase O	-0.273372	0.00103833	0.00527541	TRUE
PF12738	twin BRCT domain	-0.334146	5.13337e-05	0.000521617	TRUE
PF03456	uDENN domain	-0.449378	2.27532e-08	1.34212e-06	TRUE
PF00094	von Willebrand factor type D domain	-0.423783	1.63869e-07	6.02582e-06	TRUE
PF15227	zinc finger of C3HC4-type, RING	-0.22311	0.00783018	0.0252455	TRUE
PF14634	zinc-RING finger domain	0.2412	0.0039608	0.0151048	TRUE
PF13913	zinc-finger of a C2HC-type	-0.23979	0.00418445	0.0158046	TRUE
PF04570	zinc-finger of the FCS-type, C2-C2	-0.43518	6.94066e-08	3.24132e-06	TRUE
