# Supplementary material for: Genome-resolved biogeography of Phaeocystales, cosmopolitan bloom-forming algae
Source: Research Square preprint supplement (doi:10.21203/rs.3.rs-4339559/v1), 2024-06-11
Supplement: Supplementary file 3 [file 2bfafe0c44eab9d38f291aab.xlsx]

## Sheet: Supplementary Table S9
Supplementary Table S9: Putative homologies of ORFs predicted in endogenous NCLDV loci in P. antarctica (PaeNCLDV) and P. globosa (PgeNCLDV). Reference sequences only. Annotations determined using HH-suite and BLASTP, the total number of predicted ORFs are: PaeNCLDV type 1, 62; PaeNCLDV type 2, 56; PgeNCLDV, 46.
		Structural homology annotation with HH-suite				Sequence homology with BLASTP (best hit excluding hypothetical proteins)
	ORF #	Hit description	Probability	E-value		Hit description*	Species	Identity	E-value
PaeNCLDV type 1	4	No hit	NA	NA		HNH endonuclease	Cyanobium sp. ARS6	54.217	1e-20
	13	No hit	NA	NA		A-agglutinin anchorage subunit-like	Procambarus clarkii	21.302	0.0003
	18	Holliday Junction Resolvase, Ydc2	99.61	3.8e-20		Holliday Junction Resolvase RuvC	Pleurochrysis sp. endemic virus 2	67.456	5e-80
	20	Major capsid protein	100	2.9e-81		NCLDV Major Capsid Protein	Pleurochrysis sp. endemic virus 1a	55.851	0
	24	Uncharacterized protein R354	99.92	1.4e-30		YqaJ-like viral recombinase domain protein	Pleurochrysis sp. endemic virus 2	62.5	2e-70
	28	Genome packaging NTPase B204	98.53	2.3e-11		NCLDV virion packaging ATPase	Pleurochrysis sp. endemic virus 1a	76.923	2e-173
	29	No hit	NA	NA		NCLDV VLTF3	Pleurochrysis sp. endemic virus 2	59.247	5e-119
	50	Primase-helicase	99.79	1.5e-24		DUF927 domain-containing protein	Dulcicalothrix desertica	27.143	5e-10
PaeNCLDV type 2	13	Integrin alpha-IIb, Integrin beta-3	98.68	2.6e-12		T9SS type A sorting domain-containing protein	Bacteroidales bacterium	28.194	6e-14
	19	Holliday Junction Resolvase, Ydc2	99.61	3.8e-20		Holliday Junction Resolvase RuvC	Pleurochrysis sp. endemic virus 2	67.456	5e-80
	21	Major capsid protein	100	3.6e-81		NCLDV Major Capsid Protein	Pleurochrysis sp. endemic virus 1a	56.028	0
	24	Uncharacterized protein R354	99.92	2e-30		YqaJ-like viral recombinase domain protein	Pleurochrysis sp. endemic virus 2	61.905	3e-70
	28	Genome packaging NTPase B204	98.52	2.6e-11		NCLDV virion packaging ATPase	Pleurochrysis sp. endemic virus 1a	76.923	2e-173
	29	No hit	NA	NA		NCLDV VLTF3	Pleurochrysis sp. endemic virus 2	59.247	6e-119
	55	Primase-helicase	99.79	1.4e-24		DUF927 domain-containing protein	Dulcicalothrix desertica	27.758	1e-09
PgeNCLDV	9	Active helicase	99.6	2.9e-20		Holliday Junction Resolvase RuvC	Pleurochrysis sp. endemic virus 2	41.358	1e-35
	13	Holliday Junction Resolvase, Ydc2	99.67	3.4e-21		No hit	NA	NA	NA
	15	B646L	100	6.2e-79		NCLDV Major Capsid Protein	Pleurochrysis sp. endemic virus 2	40.753	9e-58
	23	Genome packaging NTPase B204	98.52	2.7e-11		Packaging ATPase	Pleurochrysis sp. endemic virus 2	65.744	9e-134
	25	Uncharacterized protein R354	99.95	7e-34		YqaJ-like viral recombinase domain protein	Pleurochrysis sp. endemic virus 2	44.175	5e-44
	26	No hit	NA	NA		aggrecan core protein - repetitive motifs	Oryctolagus cuniculus	35.082	3e-23
	33	Primase-helicase	99.89	6.2e-29		S3H helicase	Chrysochromulina parva virophage Moe	38.417	7e-101
	38	No hit	NA	NA		Membrane-associated lipoprotein precurser	Moritella viscosa	57.609	8e-23
	39	No hit	NA	NA		NAD-dependent glycerol-3-phosphate dehydrogenase	Emiliania huxleyi CCMP1516	31.667	1e-12
	44	No hit	NA	NA		Pub1p N-terminus	Gigaspora margarita	50.617	2e-06
