# Supplementary material for: Genome-resolved biogeography of Phaeocystales, cosmopolitan bloom-forming algae
Source: Research Square preprint supplement (doi:10.21203/rs.3.rs-4339559/v1), 2024-06-11
Supplement: Supplementary file 4 [file 44f4f7f84ebfb6b375a0ad03.xlsx]

## Sheet: Supplementary Table S4
Supplementary Table S4: Functions associated with Self-Organizing Map super-clusters in NCOG data. Annotations with green background indicate clusters with relatively increased transcript proportion, whereas orange background indicates clusters with relatively decreased transcript proportion (see Supplementary Figure S10).
SOM_id	Annotation	Count	Proportion
3	'de novo' IMP biosynthetic process	1	0.000716332
7	'de novo' pyrimidine nucleobase biosynthetic process	1	0.000539374
3	1-acyl-sn-glycerol-3-phosphate acyltransferase [EC:2.3.1.51]	1	0.000716332
6	1-alkyl-2-acetylglycerophosphocholine esterase activity	1	0.00204499
3	1-deoxy-D-xylulose-5-phosphate synthase [EC:2.2.1.7]	1	0.000716332
3	1,3-beta-glucan synthase/callose synthase catalytic subunit	3	0.002149
5	1,3-beta-glucan synthase/callose synthase catalytic subunit	1	0.00285714
7	1,3-beta-glucan synthase/callose synthase catalytic subunit	2	0.00107875
8	1,3-beta-glucan synthase/callose synthase catalytic subunit	1	0.0011976
3	17 beta-hydroxysteroid dehydrogenase type 3, HSD17B3	1	0.000716332
1	2-oxoglutarate dehydrogenase, E1 subunit	2	0.00188501
3	20S proteasome, regulatory subunit alpha type PSMA1/PRE5	1	0.000716332
3	20S proteasome, regulatory subunit alpha type PSMA3/PRE10	1	0.000716332
2	20S proteasome, regulatory subunit alpha type PSMA5/PUP2	1	0.00179211
3	20S proteasome, regulatory subunit beta type PSMB1/PRE7	1	0.000716332
5	20S proteasome, regulatory subunit beta type PSMB2/PRE1	1	0.00285714
6	20S proteasome, regulatory subunit beta type PSMB2/PRE1	1	0.00204499
1	20S proteasome, regulatory subunit beta type PSMB3/PUP3	1	0.000942507
3	20S proteasome, regulatory subunit beta type PSMB4/PRE4	1	0.000716332
3	20S proteasome, regulatory subunit beta type PSMB5/PSMB8/PRE2	1	0.000716332
2	20S proteasome, regulatory subunit beta type PSMB6/PSMB9/PRE3	1	0.00179211
4	20S proteasome, regulatory subunit beta type PSMB6/PSMB9/PRE3	1	0.00124688
1	20S proteasome, regulatory subunit beta type PSMB7/PSMB10/PUP1	1	0.000942507
6	26S proteasome regulatory complex, ATPase RPT5	1	0.00204499
4	26S proteasome regulatory complex, ATPase RPT6	1	0.00124688
5	26S proteasome regulatory complex, subunit PSMD9	1	0.00285714
8	26S proteasome regulatory complex, subunit RPN10/PSMD4	1	0.0011976
3	26S proteasome regulatory complex, subunit RPN11	2	0.00143266
1	26S proteasome regulatory complex, subunit RPN12/PSMD8	1	0.000942507
3	26S proteasome regulatory complex, subunit RPN2/PSMD1	2	0.00143266
1	26S proteasome regulatory complex, subunit RPN3/PSMD3	1	0.000942507
3	26S proteasome regulatory complex, subunit RPN3/PSMD3	1	0.000716332
4	26S proteasome regulatory complex, subunit RPN5/PSMD12	1	0.00124688
3	26S proteasome regulatory complex, subunit RPN6/PSMD11	1	0.000716332
2	26S proteasome regulatory complex, subunit RPN7/PSMD6	2	0.00358423
3	26S proteasome regulatory complex, subunit RPN8/PSMD7	1	0.000716332
3	26S proteasome regulatory complex, subunit RPN9/PSMD13	1	0.000716332
5	3-demethylubiquinone-9 3-O-methyltransferase activity	1	0.00285714
4	3-deoxy-7-phosphoheptulonate synthase activity	1	0.00124688
2	3-isopropylmalate dehydrogenase	1	0.00179211
3	3-Methylcrotonyl-CoA carboxylase, non-biotin containing subunit/Acetyl-CoA carboxylase carboxyl transferase, subunit beta	1	0.000716332
6	3-Methylcrotonyl-CoA carboxylase, non-biotin containing subunit/Acetyl-CoA carboxylase carboxyl transferase, subunit beta	1	0.00204499
3	3-oxoacyl-[acyl-carrier protein] reductase [EC:1.1.1.100]	1	0.000716332
3	3-oxoacyl-[acyl-carrier-protein] synthase II [EC:2.3.1.179]	1	0.000716332
7	3-phosphoglycerate kinase	1	0.000539374
3	3-phosphoinositide-dependent protein kinase (PDK1)	1	0.000716332
5	3'-phosphoadenosine 5'-phosphosulfate sulfotransferase (PAPS reductase)/FAD synthetase and related enzymes	1	0.00285714
7	3'-phosphoadenosine 5'-phosphosulfate synthase [EC:2.7.7.4 2.7.1.25]	1	0.000539374
1	4 iron, 4 sulfur cluster binding	1	0.000942507
2	4-alpha-hydroxytetrahydrobiopterin dehydratase activity	1	0.00179211
2	4-aminobutyrate aminotransferase	1	0.00179211
1	40s ribosomal protein s10	1	0.000942507
1	40S ribosomal protein S12	1	0.000942507
1	40S ribosomal protein S17	1	0.000942507
8	40S ribosomal protein S2/30S ribosomal protein S5	1	0.0011976
1	40S ribosomal protein S3A	1	0.000942507
1	40S ribosomal protein S4	1	0.000942507
1	5-methyltetrahydrofolate--homocysteine methyltransferase [EC:2.1.1.13]	1	0.000942507
3	5'-3' exonuclease	1	0.000716332
3	5'-3' exonuclease HKE1/RAT1	1	0.000716332
7	5'-3' exonuclease HKE1/RAT1	1	0.000539374
7	6-phosphofructokinase activity	1	0.000539374
8	6-phosphogluconate dehydrogenase	1	0.0011976
7	6-phosphogluconate dehydrogenase [EC:1.1.1.44]	1	0.000539374
6	6-phosphogluconolactonase - like protein	1	0.00204499
1	60S acidic ribosomal protein P0	1	0.000942507
7	60S ribosomal protein L13a	1	0.000539374
7	60s ribosomal protein L15	1	0.000539374
4	60S ribosomal protein L18A	1	0.00124688
1	60S ribosomal protein L27	1	0.000942507
1	60S ribosomal protein L28	1	0.000942507
5	60S ribosomal protein L29	1	0.00285714
1	60s ribosomal protein L30 isolog	1	0.000942507
7	60S ribosomal protein L35	1	0.000539374
4	60S ribosomal protein L37	1	0.00124688
7	60S ribosomal protein L37	1	0.000539374
2	60S ribosomal protein L5	1	0.00179211
1	60S ribosomal protein L7	1	0.000942507
2	60S ribosomal protein L7A	1	0.00179211
1	7-methylguanosine RNA capping	1	0.000942507
3	8-amino-7-oxononanoate synthase [EC:2.3.1.47]	1	0.000716332
1	AAA+-type ATPase	2	0.00188501
2	AAA+-type ATPase	1	0.00179211
3	AAA+-type ATPase	2	0.00143266
4	AAA+-type ATPase	1	0.00124688
7	AAA+-type ATPase	2	0.00107875
1	ABC (ATP binding cassette) 1 protein	1	0.000942507
1	acetoacetyl-CoA synthetase [EC:6.2.1.16]	1	0.000942507
2	Acetyl-CoA acetyltransferase	1	0.00179211
3	Acetyl-CoA acetyltransferase	2	0.00143266
6	acetyl-CoA carboxylase / biotin carboxylase [EC:6.4.1.2 6.3.4.14]	1	0.00204499
7	Acetyl-CoA transporter	1	0.000539374
8	Acetylcholine receptor	1	0.0011976
3	Acetylglucosaminyltransferase EXT1/exostosin 1	2	0.00143266
8	Acetylglucosaminyltransferase EXT1/exostosin 1	2	0.00239521
9	Acetylglucosaminyltransferase EXT1/exostosin 1	5	0.00340832
3	acetylglutamate kinase activity	1	0.000716332
1	Acetylornithine aminotransferase	1	0.000942507
8	acetyltransferase activity	1	0.0011976
3	Acetyltransferase, (GNAT) family	1	0.000716332
6	Actin and related proteins	1	0.00204499
9	Actin and related proteins	1	0.000681663
7	Actin regulatory protein (Wiskott-Aldrich syndrome protein)	1	0.000539374
3	Actin regulatory proteins (gelsolin/villin family)	2	0.00143266
6	Actin-related protein	1	0.00204499
9	Actin-related protein - Arp6p	2	0.00136333
3	Actin-related protein Arp2/3 complex, subunit Arp2	1	0.000716332
3	Actin-related protein Arp2/3 complex, subunit Arp3	1	0.000716332
3	Actin-related protein Arp2/3 complex, subunit ARPC1/p41-ARC	1	0.000716332
5	Actin-related protein Arp2/3 complex, subunit ARPC3	1	0.00285714
6	Activating signal cointegrator 1	1	0.00204499
4	Acyl carrier protein/NADH-ubiquinone oxidoreductase, NDUFAB1/SDAP subunit	1	0.00124688
7	acyl-[acyl-carrier-protein] desaturase [EC:1.14.19.2]	1	0.000539374
1	Acyl-CoA oxidase	1	0.000942507
2	Acyl-CoA synthetase	1	0.00179211
3	Acyl-CoA synthetase	1	0.000716332
4	Acyl-CoA synthetase	1	0.00124688
7	Acyl-CoA synthetase	1	0.000539374
9	Acyl-CoA synthetase	1	0.000681663
3	Acyl-CoA-binding protein	1	0.000716332
7	Acyl-CoA-binding protein	1	0.000539374
3	Adaptor complexes medium subunit family	1	0.000716332
5	Adenine phosphoribosyl transferases	1	0.00285714
6	Adenosine monophosphate deaminase	1	0.00204499
1	adenyl-nucleotide exchange factor activity	1	0.000942507
3	Adenylate cyclase-associated protein (CAP/Srv2p)	1	0.000716332
4	Adenylate cyclase-associated protein (CAP/Srv2p)	1	0.00124688
9	adenylate kinase [EC:2.7.4.3]	1	0.000681663
7	Adiponutrin and related vesicular transport proteins; predicted alpha/beta hydrolase	2	0.00107875
1	ADP binding	1	0.000942507
3	ADP binding	1	0.000716332
6	ADP binding	1	0.00204499
7	ADP binding	1	0.000539374
9	ADP binding	1	0.000681663
3	AICAR transformylase/IMP cyclohydrolase/methylglyoxal synthase	1	0.000716332
7	Alanine aminotransferase	1	0.000539374
6	Alanyl-tRNA synthetase	1	0.00204499
3	Alcohol dehydrogenase, class III	1	0.000716332
2	Aldehyde dehydrogenase	1	0.00179211
3	Aldehyde dehydrogenase	1	0.000716332
7	Aldehyde dehydrogenase	1	0.000539374
9	Aldehyde reductase	1	0.000681663
1	Aldo/keto reductase family proteins	1	0.000942507
2	Aldo/keto reductase family proteins	1	0.00179211
7	Aldo/keto reductase family proteins	1	0.000539374
8	Aldo/keto reductase family proteins	1	0.0011976
7	Alkyl hydroperoxide reductase, thiol specific antioxidant and related enzymes	1	0.000539374
7	Alkyl hydroperoxide reductase/peroxiredoxin	1	0.000539374
9	Alpha tubulin	1	0.000681663
4	Alpha-D-galactosidase (melibiase)	1	0.00124688
2	Alpha-isopropylmalate synthase/homocitrate synthase	1	0.00179211
3	alpha-mannosidase [EC:3.2.1.24]	1	0.000716332
1	Amine oxidase	1	0.000942507
4	Amine oxidase	1	0.00124688
5	Amine oxidase	1	0.00285714
7	Amine oxidase	1	0.000539374
1	amino acid transmembrane transport	1	0.000942507
1	Amino acid transporters	1	0.000942507
6	Amino acid transporters	1	0.00204499
9	Amino acid transporters	1	0.000681663
2	aminoacyl-tRNA ligase activity	1	0.00179211
3	aminoacyl-tRNA ligase activity	2	0.00143266
5	aminoacyl-tRNA ligase activity	2	0.00571429
7	aminoacyl-tRNA ligase activity	2	0.00107875
8	aminoacyl-tRNA ligase activity	2	0.00239521
9	aminoacyl-tRNA ligase activity	1	0.000681663
7	Aminomethyl transferase	1	0.000539374
3	Aminopeptidase I zinc metalloprotease (M18)	1	0.000716332
3	Ammonia permease	1	0.000716332
4	Ammonium transporter RHBG	1	0.00124688
8	Anaphase promoting complex, Cdc20, Cdh1, and Ama1 subunits	1	0.0011976
4	Anaphase-promoting complex (APC), Cdc23 subunit	1	0.00124688
2	Anaphase-promoting complex (APC), subunit 1 (meiotic check point regulator/Tsg24)	1	0.00179211
2	Anaphase-promoting complex (APC), subunit 2	1	0.00179211
2	anion transport	1	0.00179211
4	Ankyrin	1	0.00124688
7	Ankyrin	1	0.000539374
3	Ankyrin repeat and DHHC-type Zn-finger domain containing proteins	1	0.000716332
2	Annexin	1	0.00179211
4	Annexin	1	0.00124688
8	Annexin	1	0.0011976
3	AP-1 complex subunit beta-1	1	0.000716332
3	AP-2 complex subunit alpha	1	0.000716332
7	AP-2 complex subunit sigma-1	1	0.000539374
5	Apoptosis-related protein/predicted DNA-binding protein	1	0.00285714
2	Apurinic/apyrimidinic endonuclease and related enzymes	1	0.00179211
3	Aquaporin (major intrinsic protein family)	1	0.000716332
7	Aquaporin (major intrinsic protein family)	1	0.000539374
1	arabinan metabolic process	1	0.000942507
1	arginine biosynthetic process	1	0.000942507
3	arginine biosynthetic process via ornithine	1	0.000716332
2	Arginyl-tRNA synthetase	1	0.00179211
3	Arginyl-tRNA synthetase	1	0.000716332
6	Armadillo/beta-catenin-like repeat-containing protein	1	0.00204499
7	Aromatic amino acid aminotransferase and related proteins	1	0.000539374
1	aromatic amino acid family biosynthetic process	1	0.000942507
3	Arp2/3 protein complex	1	0.000716332
8	Arp2/3 protein complex	1	0.0011976
4	Asparaginase	1	0.00124688
7	Asparagine synthase (glutamine-hydrolyzing)	2	0.00107875
5	asparagine synthase (glutamine-hydrolyzing) activity	1	0.00285714
3	Asparaginyl-tRNA synthetase (mitochondrial)	1	0.000716332
4	Asparaginyl-tRNA synthetase (mitochondrial)	1	0.00124688
3	Aspartate aminotransferase/Glutamic oxaloacetic transaminase AAT1/GOT2	1	0.000716332
2	Aspartate kinase	1	0.00179211
5	Aspartate kinase	1	0.00285714
7	Aspartate kinase	1	0.000539374
5	aspartate-semialdehyde dehydrogenase [EC:1.2.1.11]	1	0.00285714
1	aspartic-type endopeptidase activity	1	0.000942507
2	Aspartyl protease	1	0.00179211
3	Aspartyl protease	2	0.00143266
6	Aspartyl protease	2	0.00408998
9	Aspartyl protease	1	0.000681663
3	Aspartyl-tRNA synthetase	1	0.000716332
1	Ataxin 3/Josephin	1	0.000942507
1	ATP binding	6	0.00565504
2	ATP binding	2	0.00358423
3	ATP binding	5	0.00358166
4	ATP binding	6	0.0074813
5	ATP binding	2	0.00571429
6	ATP binding	2	0.00408998
7	ATP binding	6	0.00323625
8	ATP binding	1	0.0011976
9	ATP binding	4	0.00272665
3	ATP synthase F0 subunit 6 and related proteins	1	0.000716332
7	ATP synthase F0 subunit 6 and related proteins	1	0.000539374
1	ATP synthesis coupled proton transport	1	0.000942507
3	ATP synthesis coupled proton transport	2	0.00143266
9	ATP synthesis coupled proton transport	1	0.000681663
4	ATP-dependent Clp protease, proteolytic subunit	1	0.00124688
2	ATP-dependent DNA ligase I	1	0.00179211
1	ATP-dependent RNA helicase	2	0.00188501
2	ATP-dependent RNA helicase	1	0.00179211
3	ATP-dependent RNA helicase	2	0.00143266
6	ATP-dependent RNA helicase	1	0.00204499
7	ATP-dependent RNA helicase	2	0.00107875
9	ATP-dependent RNA helicase	1	0.000681663
1	ATP-dependent RNA helicase A	1	0.000942507
3	ATP-dependent RNA helicase A	1	0.000716332
3	ATP-dependent RNA helicase pitchoune	1	0.000716332
4	ATPase activator activity	1	0.00124688
1	ATPase activity	2	0.00188501
2	ATPase activity	1	0.00179211
3	ATPase activity	2	0.00143266
4	ATPase activity	1	0.00124688
5	ATPase activity	1	0.00285714
6	ATPase activity	1	0.00204499
7	ATPase activity	2	0.00107875
8	ATPase activity	1	0.0011976
9	ATPase activity	1	0.000681663
7	ATPase activity, uncoupled	1	0.000539374
4	ATPase component of ABC transporters with duplicated ATPase domains/Translation elongation factor EF-3b	1	0.00124688
6	ATPase component of ABC transporters with duplicated ATPase domains/Translation elongation factor EF-3b	1	0.00204499
7	autophagy	1	0.000539374
8	autophagy	1	0.0011976
2	Auxilin-like protein and related proteins containing DnaJ domain	1	0.00179211
1	base-excision repair	2	0.00188501
8	Bax-mediated apoptosis inhibitor TEGT/BI-1	1	0.0011976
4	BBSome	1	0.00124688
6	Beclin-like protein	1	0.00204499
7	Beta subunit of farnesyltransferase	1	0.000539374
7	Beta-1,4-mannosyltransferase	1	0.000539374
5	Beta-galactosidase	1	0.00285714
3	Beta-N-acetylhexosaminidase	1	0.000716332
9	Beta-N-acetylhexosaminidase	1	0.000681663
6	Beta-spectrin	1	0.00204499
7	Beta-tubulin folding cofactor C	1	0.000539374
3	Bifunctional GTP cyclohydrolase II/3,4-dihydroxy-2butanone-4-phosphate synthase	1	0.000716332
7	Bifunctional GTP cyclohydrolase II/3,4-dihydroxy-2butanone-4-phosphate synthase	1	0.000539374
4	Bifunctional leukotriene A4 hydrolase/aminopeptidase LTA4H	1	0.00124688
7	biological_process	1	0.000539374
1	biosynthetic process	1	0.000942507
2	biosynthetic process	1	0.00179211
3	biosynthetic process	3	0.002149
4	biosynthetic process	1	0.00124688
6	biosynthetic process	1	0.00204499
9	biosynthetic process	1	0.000681663
4	biotin synthase [EC:2.8.1.6]	1	0.00124688
1	Branched chain alpha-keto acid dehydrogenase complex, alpha subunit	1	0.000942507
3	Branched chain alpha-keto acid dehydrogenase E1, beta subunit	1	0.000716332
1	branched-chain amino acid aminotransferase [EC:2.6.1.42]	1	0.000942507
7	Branching enzyme	1	0.000539374
5	C-3 sterol dehydrogenase/3-beta-hydroxysteroid dehydrogenase and related dehydrogenases	1	0.00285714
6	C-4 sterol methyl oxidase	1	0.00204499
2	C-type lectin	1	0.00179211
5	C-type lectin	1	0.00285714
8	C2C2-type Zn-finger protein	1	0.0011976
3	C2H2-type Zn-finger protein	1	0.000716332
1	Ca2+ sensor (EF-Hand superfamily)	1	0.000942507
3	Ca2+ transporting ATPase	1	0.000716332
2	Ca2+-binding actin-bundling protein (fimbrin/plastin), EF-Hand protein superfamily	1	0.00179211
3	Ca2+-binding actin-bundling protein (fimbrin/plastin), EF-Hand protein superfamily	1	0.000716332
6	Ca2+-binding actin-bundling protein (fimbrin/plastin), EF-Hand protein superfamily	1	0.00204499
3	Ca2+-binding actin-bundling protein (spectrin), alpha chain (EF-Hand protein superfamily)	1	0.000716332
1	Ca2+-binding protein (centrin/caltractin), EF-Hand superfamily protein	1	0.000942507
3	Ca2+-binding protein (centrin/caltractin), EF-Hand superfamily protein	1	0.000716332
9	Ca2+-binding protein (centrin/caltractin), EF-Hand superfamily protein	1	0.000681663
7	Ca2+-binding transmembrane protein LETM1/MRS7	1	0.000539374
4	Ca2+-dependent lipid-binding protein CLB1/vesicle protein vp115/Granuphilin A, contains C2 domain	1	0.00124688
3	Ca2+-transporting ATPase [EC:3.6.3.8]	1	0.000716332
1	Ca2+/calmodulin-dependent protein kinase, EF-Hand protein superfamily	2	0.00188501
3	Ca2+/calmodulin-dependent protein kinase, EF-Hand protein superfamily	3	0.002149
4	Ca2+/calmodulin-dependent protein kinase, EF-Hand protein superfamily	2	0.00249377
5	Ca2+/calmodulin-dependent protein kinase, EF-Hand protein superfamily	1	0.00285714
6	Ca2+/calmodulin-dependent protein kinase, EF-Hand protein superfamily	3	0.00613497
7	Ca2+/calmodulin-dependent protein kinase, EF-Hand protein superfamily	3	0.00161812
8	Ca2+/calmodulin-dependent protein kinase, EF-Hand protein superfamily	1	0.0011976
9	Ca2+/calmodulin-dependent protein kinase, EF-Hand protein superfamily	1	0.000681663
3	Ca2+/Na+ exchanger NCX1 and related proteins	1	0.000716332
5	Ca2+/Na+ exchanger NCX1 and related proteins	1	0.00285714
2	Cactin	1	0.00179211
7	Cactin	1	0.000539374
1	calcium ion binding	6	0.00565504
2	calcium ion binding	4	0.00716846
3	calcium ion binding	13	0.00931232
4	calcium ion binding	7	0.00872818
5	calcium ion binding	2	0.00571429
6	calcium ion binding	3	0.00613497
7	calcium ion binding	14	0.00755124
8	calcium ion binding	5	0.00598802
9	calcium ion binding	18	0.0122699
4	calcium-dependent phospholipid binding	1	0.00124688
7	calcium-dependent phospholipid binding	1	0.000539374
1	Calcyclin-binding protein CacyBP	1	0.000942507
3	Calmodulin and related proteins (EF-Hand superfamily)	1	0.000716332
4	Calmodulin and related proteins (EF-Hand superfamily)	3	0.00374065
5	Calmodulin and related proteins (EF-Hand superfamily)	1	0.00285714
6	Calmodulin and related proteins (EF-Hand superfamily)	1	0.00204499
7	Calmodulin and related proteins (EF-Hand superfamily)	3	0.00161812
9	Calmodulin and related proteins (EF-Hand superfamily)	3	0.00204499
6	Calnexin	1	0.00204499
8	Calnexin	1	0.0011976
2	Calponin	1	0.00179211
3	Calreticulin	1	0.000716332
3	carbamoyl-phosphate synthase complex	1	0.000716332
1	carbohydrate binding	1	0.000942507
3	carbohydrate binding	1	0.000716332
5	carbohydrate binding	1	0.00285714
8	carbohydrate binding	1	0.0011976
9	carbohydrate binding	1	0.000681663
1	carbohydrate biosynthetic process	1	0.000942507
3	carbohydrate catabolic process	1	0.000716332
7	carbohydrate catabolic process	1	0.000539374
1	carbohydrate metabolic process	2	0.00188501
2	carbohydrate metabolic process	3	0.00537634
3	carbohydrate metabolic process	5	0.00358166
4	carbohydrate metabolic process	1	0.00124688
5	carbohydrate metabolic process	2	0.00571429
6	carbohydrate metabolic process	1	0.00204499
7	carbohydrate metabolic process	14	0.00755124
8	carbohydrate metabolic process	2	0.00239521
9	carbohydrate metabolic process	2	0.00136333
7	carbon-sulfur lyase activity	1	0.000539374
9	carboxylic acid metabolic process	1	0.000681663
1	Carnitine O-acyltransferase CPT2/YAT1	1	0.000942507
7	Casein kinase (serine/threonine/tyrosine protein kinase)	1	0.000539374
6	casein kinase 1 [EC:2.7.11.1]	1	0.00204499
2	Casein kinase II, beta subunit	1	0.00179211
1	catalytic activity	3	0.00282752
2	catalytic activity	4	0.00716846
3	catalytic activity	6	0.00429799
4	catalytic activity	2	0.00249377
6	catalytic activity	1	0.00204499
7	catalytic activity	5	0.00269687
8	catalytic activity	1	0.0011976
9	catalytic activity	1	0.000681663
3	cation transmembrane transporter activity	1	0.000716332
7	cation transmembrane transporter activity	2	0.00107875
2	Cation transport ATPase	1	0.00179211
5	Cation transport ATPase	1	0.00285714
9	CCAAT-binding factor, subunit A (HAP3)	1	0.000681663
9	CCCH-type Zn-finger protein	1	0.000681663
3	CCR4-NOT transcription complex subunit 1	1	0.000716332
2	CCR4-NOT transcriptional regulation complex, NOT5 subunit	1	0.00179211
4	CCR4-NOT transcriptional regulation complex, NOT5 subunit	1	0.00124688
7	Cdc2-related protein kinase	1	0.000539374
9	Cdc2-related protein kinase	1	0.000681663
2	Cdc4 and related F-box and WD-40 proteins	1	0.00179211
6	Cdc4 and related F-box and WD-40 proteins	1	0.00204499
7	CDC45 (cell division cycle 45)-like protein	1	0.000539374
8	Cdk activating kinase (CAK)/RNA polymerase II transcription initiation/nucleotide excision repair factor TFIIH/TFIIK, kinase subunit CDK7	1	0.0011976
3	CDP-diacylglycerol synthase	1	0.000716332
7	cell adhesion	1	0.000539374
1	Cell adhesion complex protein bystin	1	0.000942507
6	Cell cycle control protein	1	0.00204499
3	Cell cycle control protein (crooked neck)	1	0.000716332
3	Cell cycle-associated protein Mob1-1	1	0.000716332
1	Cell division cycle 37 protein, CDC37	1	0.000942507
1	cell redox homeostasis	2	0.00188501
2	cell redox homeostasis	1	0.00179211
3	cell redox homeostasis	2	0.00143266
4	cell redox homeostasis	1	0.00124688
6	cell redox homeostasis	1	0.00204499
7	cell redox homeostasis	1	0.000539374
8	cell redox homeostasis	1	0.0011976
9	cell redox homeostasis	4	0.00272665
8	Cell surface ATP diphosphohydrolase Apyrase	1	0.0011976
9	cell wall macromolecule catabolic process	1	0.000681663
2	cellular component organization	1	0.00179211
2	cellular metabolic process	1	0.00179211
4	cellular metabolic process	2	0.00249377
6	Cellular repressor of transcription	1	0.00204499
6	cellulose binding	1	0.00204499
7	cellulose binding	1	0.000539374
8	cellulose catabolic process	1	0.0011976
3	cGMP-dependent protein kinase	2	0.00143266
5	cGMP-dependent protein kinase	1	0.00285714
8	cGMP-dependent protein kinase	1	0.0011976
4	cGMP-phosphodiesterase, delta subunit	1	0.00124688
3	Chaperone HSP104 and related ATP-dependent Clp proteases	1	0.000716332
3	Chaperonin complex component, TCP-1 alpha subunit (CCT1)	1	0.000716332
3	Chaperonin complex component, TCP-1 beta subunit (CCT2)	1	0.000716332
3	Chaperonin complex component, TCP-1 epsilon subunit (CCT5)	1	0.000716332
2	Chaperonin complex component, TCP-1 gamma subunit (CCT3)	1	0.00179211
7	Chaperonin complex component, TCP-1 gamma subunit (CCT3)	1	0.000539374
3	Chaperonin complex component, TCP-1 zeta subunit (CCT6)	1	0.000716332
3	charged multivesicular body protein 2A	1	0.000716332
6	chitin binding	1	0.00204499
9	chitin binding	1	0.000681663
1	chlorophyll biosynthetic process	1	0.000942507
1	Choline transporter-like protein	1	0.000942507
4	Choline transporter-like protein	1	0.00124688
2	chorismate biosynthetic process	1	0.00179211
1	Chorismate mutase	1	0.000942507
6	chromate transmembrane transporter activity	1	0.00204499
9	chromatin binding	1	0.000681663
7	Chromatin remodeling complex SWI/SNF, component SWI2 and related ATPases (DNA/RNA helicase superfamily)	1	0.000539374
6	Chromatin remodeling complex WSTF-ISWI, large subunit (contains heterochromatin localization, PHD and BROMO domains)	1	0.00204499
3	Chromatin remodeling complex WSTF-ISWI, small subunit	2	0.00143266
7	Chromatin remodeling complex WSTF-ISWI, small subunit	1	0.000539374
3	chromosome	1	0.000716332
7	Citrate synthase	1	0.000539374
3	Cl- channel CLC-7 and related proteins (CLC superfamily)	2	0.00143266
7	Clathrin coat dissociation kinase GAK/PTEN/Auxilin and related tyrosine phosphatases	1	0.000539374
4	clathrin coat of trans-Golgi network vesicle	1	0.00124688
3	clathrin heavy chain	1	0.000716332
4	CoA-transferase activity	1	0.00124688
3	coatomer protein complex, subunit alpha (xenin)	1	0.000716332
3	cobalamin binding	1	0.000716332
3	Cobalamin synthesis protein	1	0.000716332
7	coenzyme A biosynthetic process	1	0.000539374
9	coenzyme A biosynthetic process	1	0.000681663
1	coenzyme binding	1	0.000942507
3	coenzyme binding	1	0.000716332
4	coenzyme binding	1	0.00124688
5	coenzyme binding	1	0.00285714
7	coenzyme binding	1	0.000539374
9	coenzyme binding	1	0.000681663
7	coenzyme biosynthetic process	1	0.000539374
6	cold shock protein (beta-ribbon, CspA family)	1	0.00204499
7	cold shock protein (beta-ribbon, CspA family)	1	0.000539374
7	Component of histone deacetylase complex (breast carcinoma metastasis suppressor 1 protein in human)	1	0.000539374
8	Conserved alpha-helical protein	1	0.0011976
3	Conserved membrane protein	1	0.000716332
5	Conserved membrane protein	1	0.00285714
1	Conserved WD40 repeat-containing protein	1	0.000942507
7	Conserved WD40 repeat-containing protein AN11	1	0.000539374
4	Conserved Zn-finger protein	1	0.00124688
3	COP9 signalosome, subunit CSN1	1	0.000716332
7	COP9 signalosome, subunit CSN2	1	0.000539374
1	COP9 signalosome, subunit CSN3	1	0.000942507
9	COP9 signalosome, subunit CSN3	1	0.000681663
3	COP9 signalosome, subunit CSN4	1	0.000716332
3	COP9 signalosome, subunit CSN6	1	0.000716332
3	COP9 signalosome, subunit CSN7	1	0.000716332
8	COP9 signalosome, subunit CSN7	1	0.0011976
6	COP9 signalosome, subunit CSN8	1	0.00204499
3	COPII vesicle protein	4	0.00286533
4	COPII vesicle protein	1	0.00124688
7	COPII vesicle protein	2	0.00107875
3	copper ion binding	1	0.000716332
4	copper ion binding	1	0.00124688
3	copper ion transmembrane transporter activity	1	0.000716332
3	coproporphyrinogen III oxidase [EC:1.3.3.3]	1	0.000716332
4	Creatine kinases	1	0.00124688
5	Creatine kinases	1	0.00285714
3	CREB binding protein/P300 and related TAZ Zn-finger proteins	2	0.00143266
1	CTP synthase [EC:6.3.4.2]	1	0.000942507
1	Cullins	1	0.000942507
1	Cyclic GMP phosphodiesterase	1	0.000942507
3	Cyclic GMP phosphodiesterase	1	0.000716332
1	cyclic pyranopterin phosphate synthase [EC:4.1.99.18]	1	0.000942507
1	Cyclin	1	0.000942507
7	Cyclin	1	0.000539374
7	Cyclin B and related kinase-activating proteins	1	0.000539374
7	Cyclin L	1	0.000539374
3	Cyclophilin type peptidyl-prolyl cis-trans isomerase	1	0.000716332
3	Cyclophilin-type peptidyl-prolyl cis-trans isomerase	1	0.000716332
3	Cystathionine beta-lyases/cystathionine gamma-synthases	1	0.000716332
4	Cystathionine beta-synthase and related enzymes	1	0.00124688
7	Cystathionine beta-synthase and related enzymes	1	0.000539374
7	Cysteine desulfurase NFS1	1	0.000539374
8	Cysteine dioxygenase CDO1	1	0.0011976
4	Cysteine protease required for autophagy - Apg4p/Aut2p	1	0.00124688
1	Cysteine proteinase Cathepsin F	1	0.000942507
1	Cysteine proteinase Cathepsin L	2	0.00188501
2	Cysteine proteinase Cathepsin L	2	0.00358423
3	Cysteine proteinase Cathepsin L	1	0.000716332
6	Cysteine proteinase Cathepsin L	1	0.00204499
7	Cysteine proteinase Cathepsin L	1	0.000539374
4	Cysteine synthase	1	0.00124688
3	cysteine-type endopeptidase activity	1	0.000716332
2	cysteine-type peptidase activity	1	0.00179211
5	cysteine-type peptidase activity	1	0.00285714
9	cysteine-type peptidase activity	1	0.000681663
1	Cysteinyl-tRNA synthetase	1	0.000942507
3	Cysteinyl-tRNA synthetase	1	0.000716332
5	Cysteinyl-tRNA synthetase	1	0.00285714
1	Cytochrome b	1	0.000942507
7	Cytochrome b	1	0.000539374
2	Cytochrome b5	1	0.00179211
3	Cytochrome b5	1	0.000716332
1	cytochrome b6-f complex iron-sulfur subunit [EC:1.10.9.1]	1	0.000942507
7	cytochrome b6f complex	1	0.000539374
3	cytochrome c oxidase subunit III [EC:1.9.3.1]	1	0.000716332
1	Cytochrome c oxidase, subunit I	1	0.000942507
2	Cytochrome c oxidase, subunit I	1	0.00179211
3	Cytochrome c oxidase, subunit II, and related proteins	1	0.000716332
7	Cytochrome c oxidase, subunit II, and related proteins	1	0.000539374
1	Cytochrome c1	1	0.000942507
5	Cytochrome c1	1	0.00285714
1	Cytochrome oxidase assembly factor COX11	1	0.000942507
3	Cytochrome oxidase assembly factor COX15	1	0.000716332
5	Cytochrome oxidase subunit III and related proteins	1	0.00285714
3	Cytochrome P450 CYP4/CYP19/CYP26 subfamilies	1	0.000716332
4	Cytochrome P450 CYP4/CYP19/CYP26 subfamilies	1	0.00124688
7	cytochrome-c oxidase activity	1	0.000539374
8	cytoplasm	1	0.0011976
4	Cytoplasmic tryptophanyl-tRNA synthetase	1	0.00124688
3	Cytosolic Ca2+-dependent cysteine protease (calpain), large subunit (EF-Hand protein superfamily)	1	0.000716332
4	Cytosolic sorting protein GGA2/TOM1	1	0.00124688
2	D-3-phosphoglycerate dehydrogenase [EC:1.1.1.95]	1	0.00179211
7	D-3-phosphoglycerate dehydrogenase, D-isomer-specific 2-hydroxy acid dehydrogenase superfamily	1	0.000539374
1	D-arabinono-1, 4-lactone oxidase	1	0.000942507
3	Damage-specific DNA binding complex, subunit DDB1	2	0.00143266
3	DEAD-box protein abstrakt	1	0.000716332
3	DEAH-box RNA helicase	1	0.000716332
4	DEAH-box RNA helicase	1	0.00124688
7	Decapping enzyme complex component DCP1	1	0.000539374
1	Defense-related protein containing SCP domain	1	0.000942507
3	Defense-related protein containing SCP domain	1	0.000716332
8	Defense-related protein containing SCP domain	1	0.0011976
3	Dehydrogenases with different specificities (related to short-chain alcohol dehydrogenases)	1	0.000716332
4	Dehydrogenases with different specificities (related to short-chain alcohol dehydrogenases)	1	0.00124688
6	Dehydrogenases with different specificities (related to short-chain alcohol dehydrogenases)	3	0.00613497
7	Dehydrogenases with different specificities (related to short-chain alcohol dehydrogenases)	1	0.000539374
1	Delta 6-fatty acid desaturase/delta-8 sphingolipid desaturase	1	0.000942507
3	Delta 6-fatty acid desaturase/delta-8 sphingolipid desaturase	2	0.00143266
9	Delta 6-fatty acid desaturase/delta-8 sphingolipid desaturase	1	0.000681663
1	delta12-fatty acid dehydrogenase [EC:1.14.99.33]	1	0.000942507
1	Deoxyhypusine synthase	1	0.000942507
3	Deoxyribodipyrimidine photolyase/cryptochrome	1	0.000716332
8	Deoxyribodipyrimidine photolyase/cryptochrome	3	0.00359281
2	DHHC-type Zn-finger proteins	1	0.00179211
4	DHHC-type Zn-finger proteins	1	0.00124688
7	DHHC-type Zn-finger proteins	1	0.000539374
5	Diacylglycerol kinase	1	0.00285714
1	Dihydrolipoamide acetyltransferase	1	0.000942507
4	Dihydrolipoamide acetyltransferase	1	0.00124688
3	Dihydrolipoamide dehydrogenase	1	0.000716332
4	Dihydrolipoamide succinyltransferase (2-oxoglutarate dehydrogenase, E2 subunit)	1	0.00124688
2	Dihydrolipoamide transacylase (alpha-keto acid dehydrogenase E2 subunit)	1	0.00179211
4	Dihydrolipoamide transacylase (alpha-keto acid dehydrogenase E2 subunit)	1	0.00124688
9	Dipeptidyl aminopeptidases/acylaminoacyl-peptidases	2	0.00136333
4	Diphthamide biosynthesis protein	1	0.00124688
1	Diphthine synthase	1	0.000942507
1	Disrupter of silencing SAS10	1	0.000942507
3	DNA binding	2	0.00143266
4	DNA binding	1	0.00124688
6	DNA binding	3	0.00613497
7	DNA binding	2	0.00107875
8	DNA binding	4	0.00479042
8	DNA excision repair protein XPA/XPAC/RAD14	1	0.0011976
4	DNA integration	1	0.00124688
7	DNA integration	1	0.000539374
7	DNA ligase (NAD+) [EC:6.5.1.2]	1	0.000539374
7	DNA methylation	2	0.00107875
6	DNA methyltransferase 1-associated protein-1	1	0.00204499
7	DNA mismatch repair protein MutS	1	0.000539374
4	DNA polymerase delta subunit 1 [EC:2.7.7.7]	1	0.00124688
1	DNA polymerase delta, catalytic subunit	1	0.000942507
4	DNA polymerase delta, catalytic subunit	2	0.00249377
8	DNA polymerase delta, regulatory subunit 55	1	0.0011976
4	DNA polymerase epsilon, subunit B	1	0.00124688
7	DNA polymerase IV (family X)	1	0.000539374
3	DNA polymerase theta/eta, DEAD-box superfamily	1	0.000716332
7	DNA recombination	2	0.00107875
8	DNA recombination	1	0.0011976
3	DNA repair exonuclease MRE11	1	0.000716332
6	DNA repair protein RAD18 (SMC family protein)	1	0.00204499
7	DNA repair protein RAD18 (SMC family protein)	1	0.000539374
9	DNA replication helicase	1	0.000681663
4	DNA replication licensing factor, MCM3 component	1	0.00124688
1	DNA replication licensing factor, MCM7 component	1	0.000942507
4	DNA replication, synthesis of RNA primer	1	0.00124688
3	DNA topoisomerase I	1	0.000716332
4	DNA topoisomerase I [EC:5.99.1.2]	1	0.00124688
4	DNA topoisomerase II [EC:5.99.1.3]	1	0.00124688
5	DNA topoisomerase III beta	1	0.00285714
1	DNA topological change	1	0.000942507
2	DNA topological change	2	0.00358423
3	DNA topological change	1	0.000716332
2	DNA-binding protein jumonji/RBP2/SMCY, contains JmjC domain	1	0.00179211
4	DNA-dependent protein kinase	1	0.00124688
4	DNA-directed RNA polymerase II subunit RPB1 [EC:2.7.7.6]	1	0.00124688
7	DNA-directed RNA polymerase II subunit RPB2 [EC:2.7.7.6]	1	0.000539374
7	DNA-directed RNA polymerase III complex	1	0.000539374
7	DNA-directed RNA polymerase subunit alpha [EC:2.7.7.6]	1	0.000539374
1	DNA-directed RNA polymerase subunit E'	1	0.000942507
4	DNA-directed RNA polymerase, subunit RPB10	1	0.00124688
3	dolichyl-diphosphooligosaccharide--protein glycosyltransferase [EC:2.4.99.18]	1	0.000716332
3	Dosage compensation regulatory complex/histone acetyltransferase complex, subunit MSL-3/MRG15/EAF3, and related CHROMO domain-containing proteins	1	0.000716332
3	double-strand break repair via nonhomologous end joining	1	0.000716332
7	double-stranded RNA binding	1	0.000539374
3	Drebrins and related actin binding proteins	1	0.000716332
3	dsRNA-activated protein kinase inhibitor P58, contains TPR and DnaJ domains	2	0.00143266
5	dsRNA-activated protein kinase inhibitor P58, contains TPR and DnaJ domains	1	0.00285714
3	dTDP-4-dehydrorhamnose 3,5-epimerase activity	1	0.000716332
1	dTDP-glucose 4-6-dehydratase/UDP-glucuronic acid decarboxylase	1	0.000942507
3	dTDP-glucose 4,6-dehydratase [EC:4.2.1.46]	1	0.000716332
4	dTDP-glucose 4,6-dehydratase [EC:4.2.1.46]	1	0.00124688
1	Dual specificity phosphatase	1	0.000942507
9	Dual specificity phosphatase	2	0.00136333
3	Dual-specificity tyrosine-phosphorylation regulated kinase	2	0.00143266
1	dynein complex	3	0.00282752
3	dynein complex	3	0.002149
4	dynein complex	1	0.00124688
2	Dynein light chain	1	0.00179211
7	dynein light chain 1, axonemal	1	0.000539374
3	Dyneins, heavy chain	1	0.000716332
3	Dystonin, GAS (Growth-arrest-specific protein), and related proteins	1	0.000716332
5	E3 ubiquitin ligase	1	0.00285714
3	E3 ubiquitin protein ligase	1	0.000716332
6	E3 ubiquitin protein ligase	1	0.00204499
7	E3 ubiquitin protein ligase	1	0.000539374
9	E3 ubiquitin-protein ligase HECTD1 [EC:6.3.2.19]	1	0.000681663
8	E3 ubiquitin-protein ligase/Putative upstream regulatory element binding protein	1	0.0011976
1	eIF-2alpha kinase GCN2	1	0.000942507
3	electron carrier activity	1	0.000716332
1	electron transfer flavoprotein alpha subunit	1	0.000942507
3	Electron transfer flavoprotein ubiquinone oxidoreductase	1	0.000716332
5	Electron transfer flavoprotein ubiquinone oxidoreductase	1	0.00285714
3	Electron transfer flavoprotein, beta subunit	1	0.000716332
3	elongation factor 2	1	0.000716332
3	elongation factor 3	1	0.000716332
7	elongation factor G	1	0.000539374
3	Elongation factor-type GTP-binding protein	1	0.000716332
5	emp24/gp25L/p24 family of membrane trafficking proteins	1	0.00285714
9	endoplasmic reticulum	1	0.000681663
2	endoplasmic reticulum membrane	1	0.00179211
3	Endoplasmic reticulum membrane-associated oxidoreductin involved in disulfide bond formation	1	0.000716332
4	Endoplasmic reticulum membrane-associated oxidoreductin involved in disulfide bond formation	1	0.00124688
2	endoplasmic reticulum protein 29	1	0.00179211
3	Endoplasmic reticulum protein EP58, contains filamin rod domain and KDEL motif	1	0.000716332
3	Endosomal membrane proteins, EMP70	3	0.002149
1	Enolase	1	0.000942507
5	enoyl-[acyl-carrier protein] reductase I [EC:1.3.1.9 1.3.1.10]	1	0.00285714
3	ER lumen protein retaining receptor	1	0.000716332
3	ER to Golgi vesicle-mediated transport	1	0.000716332
7	erythronolide synthase [EC:2.3.1.94]	1	0.000539374
3	Esterase D	1	0.000716332
6	exocytosis	1	0.00204499
1	Exosomal 3'-5' exoribonuclease complex, subunit Rrp41 and related exoribonucleases	1	0.000942507
1	Exosomal 3'-5' exoribonuclease complex, subunit Rrp44/Dis3	1	0.000942507
2	Exosomal 3'-5' exoribonuclease complex, subunit Rrp44/Dis3	1	0.00179211
1	Exosomal 3'-5' exoribonuclease complex, subunit Rrp45	1	0.000942507
3	Extracellular protein SEL-1 and related proteins	1	0.000716332
5	F-actin capping protein, alpha subunit	1	0.00285714
6	F-actin capping protein, beta subunit	1	0.00204499
3	F-type H+-transporting ATPase subunit a	1	0.000716332
2	F-type H+-transporting ATPase subunit alpha [EC:3.6.3.14]	1	0.00179211
6	F-type H+-transporting ATPase subunit beta [EC:3.6.3.14]	1	0.00204499
3	F-type H+-transporting ATPase subunit c	1	0.000716332
4	F-type H+-transporting ATPase subunit epsilon	1	0.00124688
9	F-type H+-transporting ATPase subunit epsilon	1	0.000681663
4	F-type H+-transporting ATPase subunit gamma	1	0.00124688
3	F0F1-type ATP synthase, alpha subunit	1	0.000716332
6	F0F1-type ATP synthase, beta subunit	1	0.00204499
2	FAD binding	2	0.00358423
7	FAD binding	1	0.000539374
7	FAD-binding protein DIMINUTO	1	0.000539374
9	FAD-dependent sulfhydryl oxidase/quiescin and related proteins	1	0.000681663
7	Failed axon connections (fax) protein/glutathione S-transferase-like protein	1	0.000539374
2	Farnesyl cysteine-carboxyl methyltransferase	1	0.00179211
3	fatty acid biosynthetic process	1	0.000716332
4	fatty acid biosynthetic process	1	0.00124688
1	Fatty acid desaturase	1	0.000942507
3	Fatty acid desaturase	2	0.00143266
7	Fatty acid desaturase	1	0.000539374
9	Fatty acid-binding protein FABP	1	0.000681663
3	Fatty acyl-CoA elongase/Polyunsaturated fatty acid specific elongation enzyme	1	0.000716332
6	fatty-acyl-CoA binding	1	0.00204499
1	ferredoxin	1	0.000942507
5	ferredoxin--NADP+ reductase [EC:1.18.1.2]	1	0.00285714
9	Ferric reductase, NADH/NADPH oxidase and related proteins	1	0.000681663
1	Fibrillarin and related nucleolar RNA-binding proteins	1	0.000942507
3	Fibrillins and related proteins containing Ca2+-binding EGF-like domains	1	0.000716332
6	Fibrillins and related proteins containing Ca2+-binding EGF-like domains	1	0.00204499
9	fibroblast growth factor binding	1	0.000681663
1	FKBP-type peptidyl-prolyl cis-trans isomerase	4	0.00377003
2	FKBP-type peptidyl-prolyl cis-trans isomerase	1	0.00179211
3	FKBP-type peptidyl-prolyl cis-trans isomerase	1	0.000716332
6	FKBP-type peptidyl-prolyl cis-trans isomerase	1	0.00204499
7	FKBP-type peptidyl-prolyl cis-trans isomerase	3	0.00161812
4	flavin adenine dinucleotide binding	1	0.00124688
3	Flavin-containing monooxygenase	1	0.000716332
4	Flavonol reductase/cinnamoyl-CoA reductase	1	0.00124688
7	Flavonol reductase/cinnamoyl-CoA reductase	1	0.000539374
1	FMN binding	1	0.000942507
4	FMN binding	1	0.00124688
3	FOG: Ankyrin repeat	1	0.000716332
4	FOG: Ankyrin repeat	1	0.00124688
7	FOG: Ankyrin repeat	1	0.000539374
8	FOG: Ankyrin repeat	1	0.0011976
3	FOG: Leucine rich repeat	1	0.000716332
7	FOG: LIM domain	1	0.000539374
3	FOG: PPR repeat	1	0.000716332
4	FOG: PPR repeat	3	0.00374065
6	FOG: PPR repeat	1	0.00204499
7	FOG: PPR repeat	2	0.00107875
9	FOG: PPR repeat	2	0.00136333
1	FOG: Predicted E3 ubiquitin ligase	2	0.00188501
2	FOG: Predicted E3 ubiquitin ligase	2	0.00358423
3	FOG: Predicted E3 ubiquitin ligase	1	0.000716332
4	FOG: Predicted E3 ubiquitin ligase	1	0.00124688
5	FOG: Predicted E3 ubiquitin ligase	1	0.00285714
6	FOG: Predicted E3 ubiquitin ligase	1	0.00204499
7	FOG: Predicted E3 ubiquitin ligase	2	0.00107875
9	FOG: Predicted E3 ubiquitin ligase	3	0.00204499
3	FOG: RCC1 domain	1	0.000716332
7	FOG: RCC1 domain	1	0.000539374
1	FOG: RRM domain	1	0.000942507
3	FOG: RRM domain	2	0.00143266
7	FOG: RRM domain	1	0.000539374
8	FOG: Toll/interleukin receptor and related proteins containing LRR and TIR repeats	1	0.0011976
3	FOG: TPR repeat	1	0.000716332
8	FOG: TPR repeat	1	0.0011976
2	FOG: WD40 repeat	1	0.00179211
7	FOG: WD40 repeat	1	0.000539374
2	FOG: Zn-finger	1	0.00179211
3	FOG: Zn-finger	1	0.000716332
1	fructose metabolic process	1	0.000942507
2	fructose metabolic process	1	0.00179211
6	Fructose-1,6-bisphosphatase	2	0.00408998
9	Fructose-1,6-bisphosphatase	1	0.000681663
3	Fructose-6-phosphate 2-kinase/fructose-2,6-biphosphatase	1	0.000716332
3	Fructose-biphosphate aldolase	1	0.000716332
2	fructose-bisphosphate aldolase, class II [EC:4.1.2.13]	1	0.00179211
5	fructose-bisphosphate aldolase, class II [EC:4.1.2.13]	1	0.00285714
3	Fumarase	1	0.000716332
1	G-protein alpha subunit (small G protein superfamily)	1	0.000942507
2	G-protein alpha subunit (small G protein superfamily)	1	0.00179211
1	G-protein beta subunit-like protein (contains WD40 repeats)	1	0.000942507
3	G-protein coupled receptor signaling pathway	1	0.000716332
4	G-protein coupled receptor signaling pathway	1	0.00124688
6	G-protein coupled receptor signaling pathway	1	0.00204499
9	G-protein coupled receptor signaling pathway	1	0.000681663
8	G10 protein/predicted nuclear transcription regulator	1	0.0011976
3	G2/Mitotic-specific cyclin A	1	0.000716332
7	G2/Mitotic-specific cyclin A	1	0.000539374
7	GABA receptor	1	0.000539374
3	GABA-B ion channel receptor subunit GABABR1 and related subunits, G-protein coupled receptor superfamily	1	0.000716332
3	GABA(A) receptor-associated protein	1	0.000716332
3	Galactokinase	1	0.000716332
5	Galactokinase	1	0.00285714
2	Gamma tubulin	1	0.00179211
3	Gamma-glutamylcysteine synthetase	2	0.00143266
4	Gamma-glutamylcysteine synthetase	1	0.00124688
4	gamma-tubulin binding	1	0.00124688
2	Gamma-tubulin complex, DGRIP84/SPC97 component	1	0.00179211
7	GDP dissociation inhibitor	1	0.000539374
6	GDP-D-mannose 3', 5'-epimerase [EC:5.1.3.18 5.1.3.-]	1	0.00204499
1	Geranylgeranyl pyrophosphate synthase/Polyprenyl synthetase	1	0.000942507
2	Global transcriptional regulator, cell division control protein	1	0.00179211
4	Global transcriptional regulator, cell division control protein	1	0.00124688
7	Global transcriptional regulator, cell division control protein	1	0.000539374
1	Globins and related hemoproteins	1	0.000942507
9	gluconeogenesis	1	0.000681663
9	Glucosamine-phosphate N-acetyltransferase	1	0.000681663
7	Glucose-6-phosphate 1-dehydrogenase	1	0.000539374
1	Glucose-6-phosphate isomerase	1	0.000942507
1	Glucose-6-phosphate/phosphate and phosphoenolpyruvate/phosphate antiporter	1	0.000942507
3	Glucose-6-phosphate/phosphate and phosphoenolpyruvate/phosphate antiporter	5	0.00358166
6	Glucose-6-phosphate/phosphate and phosphoenolpyruvate/phosphate antiporter	1	0.00204499
7	Glucose-repressible alcohol dehydrogenase transcriptional effector CCR4 and related proteins	1	0.000539374
2	Glucosidase II catalytic (alpha) subunit and related enzymes, glycosyl hydrolase family 31	1	0.00179211
3	Glucosidase II catalytic (alpha) subunit and related enzymes, glycosyl hydrolase family 31	1	0.000716332
1	glucuronate catabolic process	1	0.000942507
7	glucuronate catabolic process	1	0.000539374
9	glutamate catabolic process to 2-oxoglutarate	1	0.000681663
2	Glutamate synthase	1	0.00179211
3	Glutamate synthase	1	0.000716332
7	Glutamate-gated kainate-type ion channel receptor subunit GluR5 and related subunits	1	0.000539374
3	Glutamine amidotransferase/cyclase	1	0.000716332
1	Glutamine synthetase	1	0.000942507
3	Glutamine synthetase	1	0.000716332
3	glutamine synthetase [EC:6.3.1.2]	1	0.000716332
7	glutamine synthetase [EC:6.3.1.2]	1	0.000539374
3	glutamyl-tRNA reductase [EC:1.2.1.70]	1	0.000716332
1	Glutamyl-tRNA synthetase	2	0.00188501
2	Glutamyl-tRNA synthetase	1	0.00179211
2	Glutamyl-tRNA synthetase (mitochondrial)	2	0.00358423
7	Glutaredoxin and related proteins	1	0.000539374
9	Glutaredoxin and related proteins	2	0.00136333
3	Glutaryl-CoA dehydrogenase	1	0.000716332
5	Glutathione peroxidase	1	0.00285714
7	Glutathione peroxidase	2	0.00107875
6	Glutathione S-transferase	1	0.00204499
6	Glutathione S-transferase-related protein	1	0.00204499
6	Glutathione synthetase	1	0.00204499
3	Glyceraldehyde 3-phosphate dehydrogenase	1	0.000716332
4	glyceraldehyde 3-phosphate dehydrogenase [EC:1.2.1.12]	1	0.00124688
6	Glycerol-3-phosphate dehydrogenase	1	0.00204499
3	glycerol-3-phosphate dehydrogenase (NAD+) [EC:1.1.1.8]	1	0.000716332
1	glycine cleavage system H protein	1	0.000942507
2	glycine dehydrogenase [EC:1.4.4.2]	1	0.00179211
1	Glycine/serine hydroxymethyltransferase	1	0.000942507
4	Glycine/serine hydroxymethyltransferase	1	0.00124688
9	glycolysis	1	0.000681663
3	Glycosyl hydrolase, family 38 - alpha-mannosidase	1	0.000716332
8	Glycosyl hydrolase, family 38 - alpha-mannosidase	1	0.0011976
4	Glycyl-tRNA synthetase and related class II tRNA synthetase	1	0.00124688
7	Glycyl-tRNA synthetase and related class II tRNA synthetase	1	0.000539374
2	glycylpeptide N-tetradecanoyltransferase activity	1	0.00179211
2	Glyoxalase	1	0.00179211
9	glyoxylate cycle	1	0.000681663
3	GMP synthase	1	0.000716332
1	Golgi reassembly stacking protein GRASP65, contains PDZ domain	1	0.000942507
7	Golgi SNAP receptor complex member	1	0.000539374
3	GPI anchor biosynthetic process	1	0.000716332
1	GTP binding	3	0.00282752
3	GTP binding	6	0.00429799
4	GTP binding	1	0.00124688
5	GTP binding	3	0.00857143
6	GTP binding	1	0.00204499
7	GTP binding	4	0.0021575
8	GTP binding	2	0.00239521
9	GTP binding	3	0.00204499
3	GTP-binding ADP-ribosylation factor Arf1	1	0.000716332
3	GTP-binding protein	1	0.000716332
4	GTP-binding protein	1	0.00124688
7	GTP-binding protein	1	0.000539374
4	GTP-binding protein AARP2 involved in 40S ribosome biogenesis	1	0.00124688
7	GTP-binding protein AARP2 involved in 40S ribosome biogenesis	1	0.000539374
2	GTP-binding protein CRFG/NOG1 (ODN superfamily)	1	0.00179211
3	GTP-binding protein DRG2 (ODN superfamily)	1	0.000716332
3	GTP-binding protein GP-1	1	0.000716332
9	GTPase activator activity	1	0.000681663
3	GTPase activity	1	0.000716332
9	GTPase Rab3, small G protein superfamily	1	0.000681663
2	GTPase Rab5/YPT51 and related small G protein superfamily GTPases	1	0.00179211
3	GTPase Rab5/YPT51 and related small G protein superfamily GTPases	1	0.000716332
2	GTPase Ran/TC4/GSP1 (nuclear protein transport pathway), small G protein superfamily	1	0.00179211
3	GTPase XAB1, interacts with DNA repair protein XPA	1	0.000716332
7	GTPase-activator protein	1	0.000539374
9	GTPase-activator protein	1	0.000681663
3	Guanidinoacetate methyltransferase and related proteins	1	0.000716332
3	Guanine nucleotide exchange factor	1	0.000716332
6	Guanine nucleotide exchange factor	1	0.00204499
7	Guanine nucleotide exchange factor	1	0.000539374
2	guanine nucleotide-binding protein subunit beta-2-like 1 protein	1	0.00179211
4	guanosine tetraphosphate metabolic process	1	0.00124688
7	guanosine tetraphosphate metabolic process	1	0.000539374
9	guanosine tetraphosphate metabolic process	1	0.000681663
2	Guanylate kinase	1	0.00179211
1	H/ACA snoRNP complex, subunit NOP10	1	0.000942507
3	H+-transporting ATPase [EC:3.6.3.6]	1	0.000716332
4	Haloacid dehalogenase-like hydrolase	1	0.00124688
3	HAT repeat protein	1	0.000716332
4	heat shock 70kDa protein 1/8	1	0.00124688
3	heat shock protein binding	1	0.000716332
3	Heat shock transcription factor	1	0.000716332
7	Heat shock transcription factor	1	0.000539374
3	Helicase-like transcription factor HLTF/DNA helicase RAD5, DEAD-box superfamily	1	0.000716332
6	Helicase-like transcription factor HLTF/DNA helicase RAD5, DEAD-box superfamily	1	0.00204499
2	Heme A farnesyltransferase	1	0.00179211
3	heme binding	1	0.000716332
2	Heme oxygenase	1	0.00179211
7	Heterochromatin-associated protein HP1 and related CHROMO domain proteins	3	0.00161812
1	Hexokinase	1	0.000942507
1	histidine biosynthetic process	1	0.000942507
2	histidine biosynthetic process	1	0.00179211
6	Histidyl-tRNA synthetase	1	0.00204499
3	Histone acetyltransferase (MYST family)	1	0.000716332
7	Histone acetyltransferase complex SAGA/ADA, subunit ADA2	1	0.000539374
6	Histone acetyltransferase SAGA/ADA, catalytic subunit PCAF/GCN5 and related proteins	1	0.00204499
9	Histone acetyltransferase SAGA/ADA, catalytic subunit PCAF/GCN5 and related proteins	1	0.000681663
3	histone deacetylase 1/2 [EC:3.5.1.98]	1	0.000716332
3	Histone deacetylase complex, catalytic component HDA1	1	0.000716332
6	Histone deacetylase complex, catalytic component HDA1	1	0.00204499
4	Histone deacetylase complex, catalytic component RPD3	1	0.00124688
8	Histone H3 (Lys4) methyltransferase complex and RNA cleavage factor II complex, subunit SWD2	1	0.0011976
7	Histone transcription regulator HIRA, WD repeat superfamily	1	0.000539374
3	histone-lysine N-methyltransferase activity	1	0.000716332
7	histone-lysine N-methyltransferase activity	1	0.000539374
9	histone-lysine N-methyltransferase activity	1	0.000681663
8	holo-[acyl-carrier-protein] synthase activity	1	0.0011976
3	Holocytochrome c synthase/heme-lyase	1	0.000716332
6	Homogentisate 1,2-dioxygenase	1	0.00204499
9	homogentisate solanesyltransferase [EC:2.5.1.117]	1	0.000681663
2	homoserine kinase [EC:2.7.1.39]	1	0.00179211
3	Huntingtin interacting protein 1 (Hip1) interactor Hippi	1	0.000716332
4	Huntingtin interacting protein HYPK	1	0.00124688
7	HVA22/DP1 gene product-related proteins	1	0.000539374
3	hydrogen ion transporting ATPase activity, rotational mechanism	1	0.000716332
1	hydrolase activity	1	0.000942507
2	hydrolase activity	2	0.00358423
3	hydrolase activity	4	0.00286533
4	hydrolase activity	1	0.00124688
5	hydrolase activity	1	0.00285714
6	hydrolase activity	3	0.00613497
7	hydrolase activity	9	0.00485437
8	hydrolase activity	2	0.00239521
9	hydrolase activity	4	0.00272665
4	hydrolase activity, acting on acid anhydrides	1	0.00124688
6	hydrolase activity, acting on acid anhydrides	1	0.00204499
7	hydrolase activity, acting on acid anhydrides	1	0.000539374
1	hydrolase activity, acting on carbon-nitrogen (but not peptide) bonds, in linear amides	1	0.000942507
7	hydrolase activity, acting on carbon-nitrogen (but not peptide) bonds, in linear amides	1	0.000539374
1	hydrolase activity, acting on ester bonds	1	0.000942507
4	hydrolase activity, acting on ester bonds	1	0.00124688
7	hydrolase activity, acting on ester bonds	1	0.000539374
8	hydrolase activity, acting on ester bonds	1	0.0011976
9	hydrolase activity, acting on ester bonds	2	0.00136333
9	hydrolase activity, acting on glycosyl bonds	1	0.000681663
1	Hydrolytic enzymes of the alpha/beta hydrolase fold	1	0.000942507
4	Hydrolytic enzymes of the alpha/beta hydrolase fold	1	0.00124688
9	Hydrolytic enzymes of the alpha/beta hydrolase fold	1	0.000681663
1	Hydroxyacyl-CoA dehydrogenase/enoyl-CoA hydratase	1	0.000942507
4	Hydroxyacyl-CoA dehydrogenase/enoyl-CoA hydratase	1	0.00124688
6	Hydroxyacyl-CoA dehydrogenase/enoyl-CoA hydratase	1	0.00204499
2	Hydroxyindole-O-methyltransferase and related SAM-dependent methyltransferases	1	0.00179211
7	Hydroxyindole-O-methyltransferase and related SAM-dependent methyltransferases	1	0.000539374
7	Hydroxymethylglutaryl-CoA synthase	1	0.000539374
1	IMP biosynthetic process	1	0.000942507
7	IMP biosynthetic process	1	0.000539374
3	IMP dehydrogenase/GMP reductase	2	0.00143266
1	indole-3-glycerol-phosphate synthase activity	1	0.000942507
3	indole-3-glycerol-phosphate synthase activity	1	0.000716332
3	Inner membrane protein translocase involved in respiratory chain assembly	1	0.000716332
7	Inner membrane protein translocase involved in respiratory chain assembly	1	0.000539374
3	Inorganic phosphate transporter	1	0.000716332
3	Inorganic pyrophosphatase/Nucleosome remodeling factor, subunit NURF38	1	0.000716332
7	Inositol 1,4,5-trisphosphate receptor	1	0.000539374
6	Inositol polyphosphate 5-phosphatase and related proteins	1	0.00204499
9	Inositol polyphosphate 5-phosphatase and related proteins	1	0.000681663
5	Inositol-1,4,5-triphosphate 5-phosphatase (synaptojanin), INP51/INP52/INP53 family	1	0.00285714
9	integral component of peroxisomal membrane	1	0.000681663
3	integral component of thylakoid membrane	1	0.000716332
3	Integral membrane protein involved in transport between the late Golgi and endosome	1	0.000716332
1	integral to membrane	6	0.00565504
2	integral to membrane	5	0.00896057
3	integral to membrane	20	0.0143266
4	integral to membrane	8	0.00997506
5	integral to membrane	1	0.00285714
6	integral to membrane	6	0.0122699
7	integral to membrane	32	0.01726
8	integral to membrane	13	0.0155689
9	integral to membrane	13	0.00886162
3	intracellular	1	0.000716332
4	intracellular	1	0.00124688
2	intracellular transport	1	0.00179211
3	intraciliary transport	1	0.000716332
7	intraciliary transport particle A	1	0.000539374
7	intramolecular lyase activity	1	0.000539374
3	ion channel activity	1	0.000716332
3	iron ion binding	2	0.00143266
7	iron ion binding	1	0.000539374
3	iron-sulfur cluster assembly	2	0.00143266
4	iron-sulfur cluster assembly	1	0.00124688
8	iron-sulfur cluster assembly	1	0.0011976
1	iron-sulfur cluster binding	2	0.00188501
3	iron-sulfur cluster binding	1	0.000716332
1	Iron/ascorbate family oxidoreductases	1	0.000942507
3	Isoamyl acetate-hydrolyzing esterase and related enzymes	1	0.000716332
6	isoleucyl-tRNA synthetase [EC:6.1.1.5]	1	0.00204499
7	Isopentenyl pyrophosphate:dimethylallyl pyrophosphate isomerase	1	0.000539374
9	isoprenoid biosynthetic process	1	0.000681663
2	Junctional membrane complex protein Junctophilin and related MORN repeat proteins	1	0.00179211
2	K+-channel ERG and related proteins, contain PAS/PAC sensor domain	1	0.00179211
3	K+-channel ERG and related proteins, contain PAS/PAC sensor domain	1	0.000716332
9	K+-channel ERG and related proteins, contain PAS/PAC sensor domain	1	0.000681663
9	K+-channel KCNQ	1	0.000681663
3	K+-dependent Ca2+/Na+ exchanger NCKX1 and related proteins	2	0.00143266
5	K+-dependent Ca2+/Na+ exchanger NCKX1 and related proteins	1	0.00285714
2	K+-dependent Na+:Ca2+ antiporter	1	0.00179211
4	K+-dependent Na+:Ca2+ antiporter	1	0.00124688
1	Karyopherin (importin) alpha	1	0.000942507
3	Karyopherin (importin) alpha	2	0.00143266
6	Karyopherin (importin) alpha	2	0.00408998
3	Karyopherin (importin) beta 1	1	0.000716332
1	Karyopherin (importin) beta 3	1	0.000942507
3	Karyopherin (importin) beta 3	2	0.00143266
3	Kelch repeat-containing proteins	2	0.00143266
6	Kelch repeat-containing proteins	1	0.00204499
3	Ketopantoate hydroxymethyltransferase	1	0.000716332
3	Kinase A-anchor protein Neurobeachin and related BEACH and WD40 repeat proteins	1	0.000716332
6	Kinase A-anchor protein Neurobeachin and related BEACH and WD40 repeat proteins	1	0.00204499
7	kinase activity	1	0.000539374
9	Kinesin (KAR3 subfamily)	1	0.000681663
1	Kinesin (SMY1 subfamily)	1	0.000942507
1	Kinesin-like protein	2	0.00188501
2	Kinesin-like protein	1	0.00179211
3	Kinesin-like protein	5	0.00358166
4	Kinesin-like protein	1	0.00124688
7	Kinesin-like protein	1	0.000539374
3	kynureninase activity	1	0.000716332
2	Kynurenine 3-monooxygenase and related flavoprotein monooxygenases	1	0.00179211
3	Kynurenine 3-monooxygenase and related flavoprotein monooxygenases	1	0.000716332
4	Kynurenine aminotransferase, glutamine transaminase K	1	0.00124688
7	Kynurenine aminotransferase, glutamine transaminase K	1	0.000539374
9	Kynurenine aminotransferase, glutamine transaminase K	1	0.000681663
7	L-lysine catabolic process to acetate	1	0.000539374
1	Lectin VIP36, involved in the transport of glycoproteins carrying high mannose-type glycans	1	0.000942507
1	Leucine permease transcriptional regulator	1	0.000942507
4	Leucine rich repeat proteins, some proteins contain F-box	1	0.00124688
5	Leucine rich repeat proteins, some proteins contain F-box	1	0.00285714
7	Leucine-rich acidic nuclear protein	1	0.000539374
7	Leucyl-tRNA synthetase	1	0.000539374
3	leucyltransferase activity	1	0.000716332
8	Ligand-gated ion channel	1	0.0011976
9	light-harvesting complex I chlorophyll a/b binding protein 1	1	0.000681663
7	lipid binding	1	0.000539374
9	lipid binding	2	0.00136333
3	Lipid exporter ABCA1 and related proteins, ABC superfamily	1	0.000716332
6	Lipid exporter ABCA1 and related proteins, ABC superfamily	2	0.00408998
9	Lipid exporter ABCA1 and related proteins, ABC superfamily	1	0.000681663
1	lipid metabolic process	3	0.00282752
2	lipid metabolic process	2	0.00358423
3	lipid metabolic process	3	0.002149
4	lipid metabolic process	2	0.00249377
5	lipid metabolic process	1	0.00285714
6	lipid metabolic process	1	0.00204499
7	lipid metabolic process	3	0.00161812
9	lipid metabolic process	5	0.00340832
3	Lipoate synthase	1	0.000716332
7	LL-diaminopimelate aminotransferase [EC:2.6.1.83]	1	0.000539374
4	Locus-specific chromosome binding proteins	1	0.00124688
9	Long-chain acyl-CoA synthetases (AMP-forming)	1	0.000681663
2	lyase activity	1	0.00179211
3	lyase activity	2	0.00143266
1	lysine biosynthetic process via diaminopimelate	1	0.000942507
1	Lysyl-tRNA synthetase (class II)	1	0.000942507
3	Lysyl-tRNA synthetase (class II)	1	0.000716332
2	M13 family peptidase	1	0.00179211
6	m3G-cap-specific nuclear import receptor (Snurportin1)	1	0.00204499
7	MADS box transcription factor	1	0.000539374
1	magnesium chelatase subunit H [EC:6.6.1.1]	1	0.000942507
3	magnesium chelatase subunit H [EC:6.6.1.1]	1	0.000716332
7	magnesium chelatase subunit H [EC:6.6.1.1]	2	0.00107875
7	magnesium ion binding	1	0.000539374
2	magnesium ion transport	1	0.00179211
3	magnesium ion transport	1	0.000716332
7	Magnesium transporters: CorA family	1	0.000539374
7	Major histocompatibility complex protein BAT4, contains G-patch and ankyrin domains	1	0.000539374
1	Malate dehydrogenase	1	0.000942507
6	Mannose lectin ERGIC-53, involved in glycoprotein traffic	1	0.00204499
9	Mannose-6-phosphate isomerase	1	0.000681663
3	Mannosyl-oligosaccharide alpha-1,2-mannosidase and related glycosyl hydrolases	1	0.000716332
2	Medium subunit of clathrin adaptor complex	1	0.00179211
2	MEKK and related serine/threonine protein kinases	1	0.00179211
1	membrane	10	0.00942507
2	membrane	7	0.0125448
3	membrane	27	0.019341
4	membrane	7	0.00872818
5	membrane	4	0.0114286
6	membrane	11	0.0224949
7	membrane	21	0.0113269
8	membrane	8	0.00958084
9	membrane	22	0.0149966
2	membrane coat	1	0.00179211
6	membrane coat	1	0.00204499
7	membrane coat	1	0.000539374
3	Membrane coat complex Retromer, subunit VPS26	1	0.000716332
7	Membrane coat complex Retromer, subunit VPS26	1	0.000539374
3	Membrane coat complex Retromer, subunit VPS5/SNX1, Sorting nexins, and related PX domain-containing proteins	1	0.000716332
6	Membrane coat complex Retromer, subunit VPS5/SNX1, Sorting nexins, and related PX domain-containing proteins	1	0.00204499
7	Membrane protein involved in ER to Golgi transport	2	0.00107875
3	Membrane-associated protein FER-1 and related ferlins, contain multiple C2 domains	1	0.000716332
4	metabolic process	1	0.00124688
5	metabolic process	1	0.00285714
7	metabolic process	1	0.000539374
1	metal ion binding	4	0.00377003
3	metal ion binding	3	0.002149
4	metal ion binding	4	0.00498753
5	metal ion binding	2	0.00571429
6	metal ion binding	1	0.00204499
7	metal ion binding	5	0.00269687
8	metal ion binding	1	0.0011976
9	metal ion binding	5	0.00340832
3	metal ion transmembrane transporter activity	1	0.000716332
7	metal ion transmembrane transporter activity	2	0.00107875
8	metal ion transmembrane transporter activity	1	0.0011976
9	metal ion transmembrane transporter activity	1	0.000681663
2	Metallopeptidase	1	0.00179211
3	Metallopeptidase	1	0.000716332
8	Metallothionein-like protein	1	0.0011976
2	Methionyl-tRNA formyltransferase	1	0.00179211
2	methylation	1	0.00179211
3	methylation	1	0.000716332
8	methylation	1	0.0011976
3	methylenetetrahydrofolate dehydrogenase (NADP+) / methenyltetrahydrofolate cyclohydrolase / formyltetrahydrofolate synthetase [EC:1.5.1.5 3.5.4.9 6.3.4.3]	1	0.000716332
4	methylenetetrahydrofolate dehydrogenase (NADP+) activity	1	0.00124688
4	Methylenetetrahydrofolate dehydrogenase/methylenetetrahydrofolate cyclohydrolase	1	0.00124688
2	methylenetetrahydrofolate reductase (NADPH) [EC:1.5.1.20]	1	0.00179211
3	Methylmalonate semialdehyde dehydrogenase	1	0.000716332
1	methyltransferase activity	2	0.00188501
2	methyltransferase activity	1	0.00179211
3	methyltransferase activity	2	0.00143266
4	methyltransferase activity	2	0.00249377
5	methyltransferase activity	1	0.00285714
7	methyltransferase activity	2	0.00107875
8	methyltransferase activity	4	0.00479042
9	methyltransferase activity	1	0.000681663
1	Methyltransferase-like protein	1	0.000942507
4	Methyltransferases	1	0.00124688
1	Microfibrillar-associated protein MFAP1	1	0.000942507
1	microtubule binding	3	0.00282752
2	microtubule binding	2	0.00358423
3	microtubule binding	4	0.00286533
5	microtubule binding	1	0.00285714
7	microtubule binding	1	0.000539374
8	Microtubule-associated protein CRIPT	1	0.0011976
7	Microtubule-associated serine/threonine kinase and related proteins	1	0.000539374
9	Microtubule-associated serine/threonine kinase and related proteins	1	0.000681663
5	Microtubule-binding protein MIP-T3	1	0.00285714
2	minor histocompatibility antigen H13 [EC:3.4.23.-]	1	0.00179211
2	Mismatch repair ATPase MSH6 (MutS family)	1	0.00179211
1	mismatched DNA binding	1	0.000942507
6	mismatched DNA binding	1	0.00204499
7	mismatched DNA binding	1	0.000539374
9	mismatched DNA binding	1	0.000681663
4	Mitochondrial associated endoribonuclease MAR1 (isochorismatase superfamily)	1	0.00124688
3	Mitochondrial ATP-dependent protease PIM1/LON	1	0.000716332
7	Mitochondrial ATP-dependent protease PIM1/LON	1	0.000539374
9	Mitochondrial ATP-dependent protease PIM1/LON	3	0.00204499
9	Mitochondrial carrier protein CGI-69	1	0.000681663
3	Mitochondrial carrier protein MRS3/4	1	0.000716332
7	Mitochondrial carrier protein PET8	1	0.000539374
3	Mitochondrial chaperonin, Cpn60/Hsp60p	1	0.000716332
4	Mitochondrial chaperonin, Cpn60/Hsp60p	1	0.00124688
2	Mitochondrial elongation factor	1	0.00179211
7	Mitochondrial F1F0-ATP synthase, subunit delta/ATP16	1	0.000539374
5	Mitochondrial F1F0-ATP synthase, subunit OSCP/ATP5	1	0.00285714
3	Mitochondrial fatty acid anion carrier protein/Uncoupling protein	2	0.00143266
8	Mitochondrial Fe/S cluster exporter, ABC superfamily	1	0.0011976
1	Mitochondrial import inner membrane translocase, subunit TIM17	1	0.000942507
2	Mitochondrial import inner membrane translocase, subunit TIM23	1	0.00179211
7	mitochondrial inner membrane	1	0.000539374
1	Mitochondrial oxoglutarate/malate carrier proteins	1	0.000942507
2	Mitochondrial oxoglutarate/malate carrier proteins	2	0.00358423
3	Mitochondrial phosphate carrier protein	1	0.000716332
4	Mitochondrial processing peptidase, alpha subunit	1	0.00124688
8	Mitochondrial processing peptidase, alpha subunit	1	0.0011976
3	Mitochondrial processing peptidase, beta subunit, and related enzymes (insulinase superfamily)	1	0.000716332
7	Mitochondrial ribosomal protein MRP7 (L2)	1	0.000539374
2	Mitochondrial solute carrier protein	1	0.00179211
7	Mitochondrial solute carrier protein	1	0.000539374
9	Mitochondrial solute carrier protein	2	0.00136333
7	Mitochondrial sulfhydryl oxidase involved in the biogenesis of cytosolic Fe/S proteins	1	0.000539374
7	Mitochondrial translation elongation factor EF-Tsmt, catalyzes nucleotide exchange on EF-Tumt	2	0.00107875
2	Mitochondrial tricarboxylate/dicarboxylate carrier proteins	1	0.00179211
2	Mitogen-activated protein kinase	1	0.00179211
3	Mitogen-activated protein kinase	1	0.000716332
7	Mitogen-activated protein kinase	1	0.000539374
7	Mitogen-activated protein kinase (MAPK) kinase MKK4	1	0.000539374
2	Mitogen-activated protein kinase kinase (MAP2K)	1	0.00179211
7	Mitogen-activated protein kinase kinase (MAP2K)	1	0.000539374
3	Mitogen-activated protein kinase kinase kinase kinase (MAP4K), germinal center kinase family	1	0.000716332
9	mitotic spindle assembly checkpoint	1	0.000681663
2	Mn2+ and Fe2+ transporters of the NRAMP family	1	0.00179211
1	Molecular chaperone (DnaJ superfamily)	1	0.000942507
2	Molecular chaperone (DnaJ superfamily)	1	0.00179211
3	Molecular chaperone (DnaJ superfamily)	3	0.002149
4	Molecular chaperone (DnaJ superfamily)	2	0.00249377
5	Molecular chaperone (DnaJ superfamily)	1	0.00285714
6	Molecular chaperone (DnaJ superfamily)	1	0.00204499
7	Molecular chaperone (DnaJ superfamily)	1	0.000539374
8	Molecular chaperone (DnaJ superfamily)	1	0.0011976
9	Molecular chaperone (DnaJ superfamily)	1	0.000681663
2	molecular chaperone HtpG	1	0.00179211
2	Molecular chaperone of the GrpE family	1	0.00179211
3	Molecular chaperone of the GrpE family	1	0.000716332
3	Molecular chaperone Prefoldin, subunit 2	1	0.000716332
2	Molecular chaperones GRP78/BiP/KAR2, HSP70 superfamily	1	0.00179211
3	Molecular chaperones GRP78/BiP/KAR2, HSP70 superfamily	1	0.000716332
3	Molecular chaperones HSP105/HSP110/SSE1, HSP70 superfamily	1	0.000716332
4	Molecular chaperones HSP105/HSP110/SSE1, HSP70 superfamily	1	0.00124688
5	Molecular chaperones HSP105/HSP110/SSE1, HSP70 superfamily	1	0.00285714
6	Molecular chaperones HSP105/HSP110/SSE1, HSP70 superfamily	1	0.00204499
1	Molecular chaperones HSP70/HSC70, HSP70 superfamily	1	0.000942507
5	Molecular chaperones mortalin/PBP74/GRP75, HSP70 superfamily	1	0.00285714
2	Molecular co-chaperone STI1	1	0.00179211
3	Molecular co-chaperone STI1	1	0.000716332
5	Molecular co-chaperone STI1	2	0.00571429
6	Molecular co-chaperone STI1	1	0.00204499
7	Molecular co-chaperone STI1	1	0.000539374
9	Molecular co-chaperone STI1	1	0.000681663
2	Molybdopterin biosynthesis-related protein	1	0.00179211
1	motile cilium	1	0.000942507
3	motile cilium	1	0.000716332
5	motor activity	1	0.00285714
6	motor activity	1	0.00204499
7	motor activity	1	0.000539374
9	motor activity	2	0.00136333
6	mRNA binding	1	0.00204499
4	mRNA cap methyltransferase	1	0.00124688
1	mRNA cleavage and polyadenylation factor I complex, subunit RNA14	1	0.000942507
7	mRNA cleavage and polyadenylation factor IA/II complex, subunit CLP1	1	0.000539374
3	mRNA cleavage and polyadenylation factor II complex, BRR5 (CPSF subunit)	1	0.000716332
4	mRNA cleavage and polyadenylation factor II complex, subunit CFT2 (CPSF subunit)	1	0.00124688
2	mRNA deadenylase subunit	1	0.00179211
1	mRNA export protein (contains WD40 repeats)	1	0.000942507
9	mRNA export protein (contains WD40 repeats)	1	0.000681663
1	mRNA guanylyltransferase activity	1	0.000942507
5	mRNA guanylyltransferase activity	1	0.00285714
9	mRNA processing	1	0.000681663
3	mRNA splicing factor	1	0.000716332
4	mRNA splicing factor	1	0.00124688
5	mRNA splicing factor	1	0.00285714
9	mRNA splicing factor	1	0.000681663
9	mRNA splicing factor ATP-dependent RNA helicase	1	0.000681663
6	mRNA splicing factor PRP31	1	0.00204499
4	mRNA splicing factor/probable chromatin binding snw family nuclear protein	1	0.00124688
3	mRNA splicing protein CDC5 (Myb superfamily)	2	0.00143266
2	mRNA splicing, via spliceosome	1	0.00179211
9	Multidrug resistance-associated protein/mitoxantrone resistance protein, ABC superfamily	1	0.000681663
3	Multidrug/pheromone exporter, ABC superfamily	1	0.000716332
9	Multidrug/pheromone exporter, ABC superfamily	1	0.000681663
3	Multifunctional chaperone (14-3-3 family)	1	0.000716332
3	Multifunctional pyrimidine synthesis protein CAD (includes carbamoyl-phophate synthetase, aspartate transcarbamylase, and glutamine amidotransferase)	1	0.000716332
7	Multitransmembrane protein	1	0.000539374
2	myo-inositol-1-phosphate synthase [EC:5.5.1.4]	1	0.00179211
1	Myosin assembly protein/sexual cycle protein and related proteins	2	0.00188501
4	Myosin assembly protein/sexual cycle protein and related proteins	1	0.00124688
3	Myosin class V heavy chain	2	0.00143266
3	Myosin class VI heavy chain	1	0.000716332
5	Myosin VII, myosin IXB and related myosins	1	0.00285714
7	Myosin VII, myosin IXB and related myosins	1	0.000539374
8	Myosin VII, myosin IXB and related myosins	1	0.0011976
7	N-acetylglucosaminyltransferase complex, subunit PIG-C/GPI2, required for phosphatidylinositol biosynthesis	1	0.000539374
4	N-acetylglucosaminyltransferase I	1	0.00124688
3	N-arginine dibasic convertase NRD1 and related Zn2+-dependent endopeptidases, insulinase superfamily	2	0.00143266
6	N-arginine dibasic convertase NRD1 and related Zn2+-dependent endopeptidases, insulinase superfamily	2	0.00408998
7	N-arginine dibasic convertase NRD1 and related Zn2+-dependent endopeptidases, insulinase superfamily	2	0.00107875
3	N-methyl-D-aspartate receptor glutamate-binding subunit	1	0.000716332
3	N-methyltransferase	1	0.000716332
6	N-methyltransferase	1	0.00204499
9	N-methyltransferase	1	0.000681663
7	N-terminal acetyltransferase	1	0.000539374
4	Na+-independent Cl/HCO3 exchanger AE1 and related transporters (SLC4 family)	1	0.00124688
8	NAD dependent epimerase	1	0.0011976
7	NAD-dependent malate dehydrogenase	1	0.000539374
3	NAD(P) transhydrogenase [EC:1.6.1.2]	1	0.000716332
3	NAD(P)+-protein-arginine ADP-ribosyltransferase activity	2	0.00143266
6	NAD(P)+-protein-arginine ADP-ribosyltransferase activity	1	0.00204499
2	NAD+ ADP-ribosyltransferase activity	1	0.00179211
8	NAD+ ADP-ribosyltransferase activity	1	0.0011976
9	NAD+ ADP-ribosyltransferase activity	1	0.000681663
7	NAD+ binding	2	0.00107875
9	NAD+ binding	1	0.000681663
1	NADH dehydrogenase (ubiquinone) Fe-S protein 1 [EC:1.6.5.3 1.6.99.3]	1	0.000942507
4	NADH dehydrogenase subunit 1	1	0.00124688
1	NADH dehydrogenase subunits 2, 5, and related proteins	1	0.000942507
3	NADH dehydrogenase subunits 2, 5, and related proteins	1	0.000716332
5	NADH dehydrogenase subunits 2, 5, and related proteins	1	0.00285714
7	NADH dehydrogenase subunits 2, 5, and related proteins	1	0.000539374
4	NADH dehydrogenase, subunit 4	1	0.00124688
4	NADH pyrophosphatase I of the Nudix family of hydrolases	1	0.00124688
1	NADH-cytochrome b-5 reductase	1	0.000942507
6	NADH-cytochrome b-5 reductase	1	0.00204499
3	NADH-dehydrogenase (ubiquinone)	1	0.000716332
7	NADH-dehydrogenase (ubiquinone)	1	0.000539374
3	NADH-quinone oxidoreductase subunit C [EC:1.6.5.3]	1	0.000716332
4	NADH-quinone oxidoreductase subunit H [EC:1.6.5.3]	1	0.00124688
4	NADH-quinone oxidoreductase subunit J [EC:1.6.5.3]	1	0.00124688
8	NADH-quinone oxidoreductase subunit K [EC:1.6.5.3]	1	0.0011976
1	NADH-quinone oxidoreductase subunit N [EC:1.6.5.3]	1	0.000942507
3	NADH-ubiquinone oxidoreductase, NDUFS1/75 kDa subunit	3	0.002149
9	NADH:flavin oxidoreductase/12-oxophytodienoate reductase	1	0.000681663
7	NADH:ubiquinone oxidoreductase, B17.2 subunit	1	0.000539374
4	NADH:ubiquinone oxidoreductase, NDUFA5/B13 subunit	1	0.00124688
3	NADH:ubiquinone oxidoreductase, NDUFA9/39kDa subunit	1	0.000716332
4	NADH:ubiquinone oxidoreductase, NDUFB7/B18 subunit	1	0.00124688
2	NADH:ubiquinone oxidoreductase, NDUFS2/49 kDa subunit	1	0.00179211
4	NADH:ubiquinone oxidoreductase, NDUFS8/23 kDa subunit	1	0.00124688
3	NADH:ubiquinone oxidoreductase, NDUFV1/51kDa subunit	1	0.000716332
8	NADH:ubiquinone oxidoreductase, NDUFV2/24 kD subunit	1	0.0011976
1	NADP/FAD dependent oxidoreductase	3	0.00282752
2	NADP+-dependent malic enzyme	1	0.00179211
3	NADP+-dependent malic enzyme	1	0.000716332
1	NADPH2:quinone reductase [EC:1.6.5.5]	1	0.000942507
3	NDR and related serine/threonine kinases	1	0.000716332
2	NEDD8-activating complex, APP-BP1/UBA5 component	1	0.00179211
5	NEDD8-activating complex, APP-BP1/UBA5 component	1	0.00285714
3	NEDD8-activating complex, catalytic component UBA3	1	0.000716332
2	Neoplastic transformation suppressor Pdcd4/MA-3, contains MA3 domain	1	0.00179211
1	Neurexin IV	1	0.000942507
7	nickel ion binding	1	0.000539374
6	NifU-like domain-containing proteins	1	0.00204499
3	NIMA (never in mitosis)-related G2-specific serine/threonine protein kinase	1	0.000716332
4	nitrogen compound metabolic process	1	0.00124688
9	NMD protein affecting ribosome stability and mRNA decay	1	0.000681663
9	Nonsense-mediated mRNA decay 2 protein	1	0.000681663
3	Notchless-like WD40 repeat-containing protein	1	0.000716332
7	Nuclear cap-binding complex, subunit NCBP1/CBP80	1	0.000539374
7	Nuclear cap-binding protein complex, subunit CBP20 (RRM superfamily)	1	0.000539374
3	Nuclear distribution protein NUDC	2	0.00143266
5	Nuclear distribution protein NUDC	1	0.00285714
1	Nuclear exosomal RNA helicase MTR4, DEAD-box superfamily	1	0.000942507
2	Nuclear exosomal RNA helicase MTR4, DEAD-box superfamily	1	0.00179211
4	Nuclear exosomal RNA helicase MTR4, DEAD-box superfamily	1	0.00124688
3	Nuclear export receptor CSE1/CAS (importin beta superfamily)	1	0.000716332
3	Nuclear helicase MOP-3/SNO (DEAD-box superfamily)	2	0.00143266
4	Nuclear helicase MOP-3/SNO (DEAD-box superfamily)	1	0.00124688
6	Nuclear helicase MOP-3/SNO (DEAD-box superfamily)	1	0.00204499
6	Nuclear inhibitor of phosphatase-1	1	0.00204499
7	Nuclear inhibitor of phosphatase-1	2	0.00107875
9	Nuclear inhibitor of phosphatase-1	1	0.000681663
3	Nuclear matrix protein	1	0.000716332
1	nuclear pore	1	0.000942507
3	nuclear pore	1	0.000716332
5	nuclear pore	1	0.00285714
8	nuclear pore	1	0.0011976
5	Nuclear pore complex, Nup155 component (D Nup154, sc Nup157/Nup170)	1	0.00285714
5	Nuclear pore complex, Nup98 component (sc Nup145/Nup100/Nup116)	1	0.00285714
5	Nuclear pore complex, p54 component (sc Nup57)	1	0.00285714
1	Nuclear pore complex, rNpl4 component (sc Npl4)	1	0.000942507
3	Nuclear pore complex, rNpl4 component (sc Npl4)	1	0.000716332
3	Nuclear transport receptor CRM1/MSN5 (importin beta superfamily)	1	0.000716332
3	Nuclear transport receptor Karyopherin-beta2/Transportin (importin beta superfamily)	1	0.000716332
4	Nuclear transport receptor Karyopherin-beta2/Transportin (importin beta superfamily)	1	0.00124688
3	Nuclear transport receptor RanBP16 (importin beta superfamily)	1	0.000716332
1	Nuclear transport receptor RANBP7/RANBP8 (importin beta superfamily)	1	0.000942507
1	nucleic acid binding	5	0.00471254
2	nucleic acid binding	1	0.00179211
3	nucleic acid binding	10	0.00716332
4	nucleic acid binding	3	0.00374065
5	nucleic acid binding	1	0.00285714
6	nucleic acid binding	4	0.00817996
7	nucleic acid binding	7	0.00377562
8	nucleic acid binding	4	0.00479042
9	nucleic acid binding	3	0.00204499
3	nucleobase, nucleoside, nucleotide and nucleic acid metabolic process	1	0.000716332
9	nucleobase, nucleoside, nucleotide and nucleic acid metabolic process	1	0.000681663
1	Nucleolar GTPase	1	0.000942507
1	Nucleolar GTPase/ATPase p130	1	0.000942507
2	Nucleoside diphosphate kinase	1	0.00179211
8	Nucleoside diphosphate kinase	1	0.0011976
1	nucleoside metabolic process	1	0.000942507
3	nucleoside metabolic process	1	0.000716332
4	nucleoside metabolic process	1	0.00124688
9	nucleoside metabolic process	1	0.000681663
1	Nucleoside phosphatase	1	0.000942507
9	Nucleoside phosphatase	1	0.000681663
1	Nucleoside transporter	1	0.000942507
7	nucleoside-diphosphate kinase [EC:2.7.4.6]	1	0.000539374
8	nucleoside-triphosphate diphosphatase activity	1	0.0011976
1	Nucleosome assembly protein NAP-1	1	0.000942507
6	Nucleosome remodeling factor, subunit CAF1/NURF55/MSI1	1	0.00204499
3	Nucleosome-binding factor SPN, POB3 subunit	1	0.000716332
4	Nucleosome-binding factor SPN, POB3 subunit	2	0.00249377
1	nucleotide binding	1	0.000942507
9	nucleotide binding	1	0.000681663
3	Nucleotide excision repair factor NEF2, RAD23 component	1	0.000716332
1	Nucleotide excision repair protein RAD16	1	0.000942507
2	Nucleotide excision repair protein RAD16	1	0.00179211
4	Nucleotide excision repair protein RAD16	1	0.00124688
8	nucleotide metabolic process	1	0.0011976
1	Nucleotide-sugar transporter VRG4/SQV-7	1	0.000942507
3	Nucleotide-sugar transporter VRG4/SQV-7	1	0.000716332
5	Nucleotide-sugar transporter VRG4/SQV-7	1	0.00285714
3	nucleotidyltransferase activity	3	0.002149
5	nucleotidyltransferase activity	1	0.00285714
7	nucleotidyltransferase activity	1	0.000539374
1	nucleus	4	0.00377003
3	nucleus	2	0.00143266
4	nucleus	1	0.00124688
5	nucleus	1	0.00285714
6	nucleus	3	0.00613497
8	nucleus	3	0.00359281
2	O-acetylhomoserine (thiol)-lyase [EC:2.5.1.49]	1	0.00179211
1	O-linked N-acetylglucosamine transferase OGT	1	0.000942507
6	O-linked N-acetylglucosamine transferase OGT	1	0.00204499
2	O-methyltransferase	1	0.00179211
1	O-methyltransferase activity	1	0.000942507
4	O-methyltransferase activity	1	0.00124688
7	O-methyltransferase activity	1	0.000539374
9	Origin recognition complex, subunit 1, and related proteins	1	0.000681663
7	Origin recognition complex, subunit 2	1	0.000539374
3	Origin recognition complex, subunit 4	1	0.000716332
1	Ornithine aminotransferase	1	0.000942507
4	Ornithine aminotransferase	1	0.00124688
1	Ornithine carbamoyltransferase OTC/ARG3	1	0.000942507
7	Ornithine carbamoyltransferase OTC/ARG3	1	0.000539374
3	Ornithine decarboxylase	1	0.000716332
7	OTU (ovarian tumor)-like cysteine protease	1	0.000539374
1	oxidation reduction	17	0.0160226
2	oxidation reduction	13	0.0232975
3	oxidation reduction	23	0.0164756
4	oxidation reduction	14	0.0174564
5	oxidation reduction	4	0.0114286
6	oxidation reduction	4	0.00817996
7	oxidation reduction	35	0.0188781
8	oxidation reduction	14	0.0167665
9	oxidation reduction	13	0.00886162
3	oxidoreductase activity	3	0.002149
4	oxidoreductase activity	2	0.00249377
6	oxidoreductase activity	1	0.00204499
7	oxidoreductase activity	1	0.000539374
4	oxidoreductase activity, acting on the CH-CH group of donors	1	0.00124688
3	Oxidosqualene-lanosterol cyclase and related proteins	2	0.00143266
7	P-P-bond-hydrolysis-driven protein transmembrane transporter activity	1	0.000539374
2	P-type ATPase	1	0.00179211
3	P-type ATPase	4	0.00286533
5	P-type ATPase	1	0.00285714
6	P-type ATPase	1	0.00204499
4	p53 inducible protein PIR121	1	0.00124688
2	PAB-dependent poly(A) ribonuclease, subunit PAN2	1	0.00179211
7	Paf1/RNA polymerase II complex, RTF1 component (involved in regulation of TATA box-binding protein)	1	0.000539374
3	pantothenate biosynthetic process	1	0.000716332
9	pathogenesis	1	0.000681663
1	Pattern-formation protein/guanine nucleotide exchange factor	2	0.00188501
2	Pattern-formation protein/guanine nucleotide exchange factor	1	0.00179211
6	Pattern-formation protein/guanine nucleotide exchange factor	1	0.00204499
7	Pectin acetylesterase and similar proteins	2	0.00107875
6	peptide biosynthetic process	1	0.00204499
2	Peptide chain release factor 1 (eRF1)	1	0.00179211
1	Peptide deformylase	1	0.000942507
6	Peptide methionine sulfoxide reductase	1	0.00204499
1	peptidyl-amino acid modification	1	0.000942507
5	peptidyl-amino acid modification	1	0.00285714
7	peptidyl-amino acid modification	1	0.000539374
4	Peptidyl-prolyl cis-trans isomerase	1	0.00124688
6	Peptidyl-prolyl cis-trans isomerase	1	0.00204499
1	peptidyl-prolyl cis-trans isomerase activity	1	0.000942507
4	peptidyl-prolyl cis-trans isomerase activity	2	0.00249377
5	peptidyl-prolyl cis-trans isomerase activity	1	0.00285714
6	peptidyl-prolyl cis-trans isomerase activity	2	0.00408998
7	peptidyl-prolyl cis-trans isomerase activity	2	0.00107875
8	peptidyl-prolyl cis-trans isomerase activity	1	0.0011976
6	peptidyl-prolyl cis-trans isomerase C [EC:5.2.1.8]	1	0.00204499
9	periplasmic space	1	0.000681663
1	Permease of the major facilitator superfamily	1	0.000942507
5	Permease of the major facilitator superfamily	1	0.00285714
6	Permease of the major facilitator superfamily	1	0.00204499
7	Permease of the major facilitator superfamily	1	0.000539374
3	Peroxisomal long-chain acyl-CoA transporter, ABC superfamily	1	0.000716332
5	Peroxisomal membrane protein MPV17 and related proteins	1	0.00285714
7	Peroxisomal membrane protein MPV17 and related proteins	2	0.00107875
9	Peroxisomal membrane protein MPV17 and related proteins	1	0.000681663
7	Peroxisomal targeting signal type 2 receptor	1	0.000539374
7	peroxisome fission	1	0.000539374
3	PHD finger protein BR140/LIN-49	1	0.000716332
2	PHD Zn-finger protein	1	0.00179211
1	phenylalanyl-tRNA synthetase alpha chain [EC:6.1.1.20]	1	0.000942507
3	phenylalanyl-tRNA synthetase alpha chain [EC:6.1.1.20]	1	0.000716332
2	phenylalanyl-tRNA synthetase beta chain [EC:6.1.1.20]	1	0.00179211
4	phosphatase activity	1	0.00124688
5	phosphatase activity	1	0.00285714
6	phosphatase activity	1	0.00204499
8	Phosphate acyltransferase	1	0.0011976
5	Phosphatidylethanolamine binding protein	1	0.00285714
7	Phosphatidylinositol 3-kinase VPS34, involved in signal transduction	1	0.000539374
6	Phosphatidylinositol 4-kinase	1	0.00204499
3	Phosphatidylinositol 4-kinase, involved in intracellular trafficking and secretion	1	0.000716332
5	Phosphatidylinositol 4-kinase, involved in intracellular trafficking and secretion	2	0.00571429
3	phosphatidylinositol binding	1	0.000716332
6	phosphatidylinositol binding	1	0.00204499
7	phosphatidylinositol binding	1	0.000539374
8	phosphatidylinositol binding	1	0.0011976
9	phosphatidylinositol binding	1	0.000681663
3	phosphatidylinositol metabolic process	1	0.000716332
7	phosphatidylinositol metabolic process	1	0.000539374
7	phosphatidylinositol phosphorylation	3	0.00161812
1	Phosphatidylinositol synthase	1	0.000942507
7	Phosphatidylinositol transfer protein SEC14 and related proteins	2	0.00107875
3	Phosphatidylinositol-4-phosphate 5-kinase	2	0.00143266
3	Phosphatidylinositol-4-phosphate 5-kinase and related FYVE finger-containing proteins	1	0.000716332
4	Phosphatidylserine-specific receptor PtdSerR, contains JmjC domain	1	0.00124688
3	Phosphoadenosine phosphosulfate reductase	1	0.000716332
3	Phosphoesterases	1	0.000716332
7	Phosphoesterases	1	0.000539374
1	Phosphoglucomutase	1	0.000942507
6	Phosphoglucomutase	1	0.00204499
3	Phosphoglucomutase/phosphomannomutase	1	0.000716332
8	Phosphoglucomutase/phosphomannomutase	1	0.0011976
7	Phosphoglycerate mutase	1	0.000539374
3	Phospholipase A2-activating protein (contains WD40 repeats)	1	0.000716332
3	Phospholipase C	2	0.00143266
4	Phospholipase C	1	0.00124688
9	Phospholipase C	1	0.000681663
4	Phosphomannomutase	1	0.00124688
2	Phosphoribosylamidoimidazole-succinocarboxamide synthase	1	0.00179211
7	phosphoribosylamine-glycine ligase activity	1	0.000539374
2	Phosphoribosylformimino-5-aminoimidazole carboxamide ribonucleotide (ProFAR) isomerase	1	0.00179211
1	Phosphoribosylformylglycinamidine synthase	1	0.000942507
4	phosphoribulokinase [EC:2.7.1.19]	1	0.00124688
2	phosphorus-oxygen lyase activity	1	0.00179211
3	phosphorus-oxygen lyase activity	2	0.00143266
2	phosphorylation	1	0.00179211
3	phosphorylation	1	0.000716332
3	phosphoserine aminotransferase [EC:2.6.1.52]	1	0.000716332
6	phosphoserine phosphatase activity	1	0.00204499
7	Phosphotyrosyl phosphatase activator	1	0.000539374
2	Photoreceptor synaptic vesicle protein HRG4/UNC-119	1	0.00179211
1	photosynthesis	1	0.000942507
3	photosynthesis	1	0.000716332
5	photosynthesis	1	0.00285714
7	photosynthesis	1	0.000539374
8	photosynthesis	1	0.0011976
9	photosynthesis	1	0.000681663
3	photosystem II	1	0.000716332
4	photosystem II	1	0.00124688
6	photosystem II	1	0.00204499
7	photosystem II	1	0.000539374
6	photosystem II cytochrome c550	1	0.00204499
7	photosystem II P680 reaction center D1 protein	1	0.000539374
1	photosystem II PsbU protein	1	0.000942507
7	photosystem II reaction center	1	0.000539374
3	photosystem II stabilization	1	0.000716332
7	Phytochelatin synthase	1	0.000539374
9	plasma membrane	1	0.000681663
1	Plasma membrane H+-transporting ATPase	1	0.000942507
7	plastid small ribosomal subunit	1	0.000539374
2	Pleiotropic regulator 1	1	0.00179211
1	Polyadenylate-binding protein (RRM superfamily)	1	0.000942507
3	Polyadenylate-binding protein (RRM superfamily)	2	0.00143266
6	Polyadenylate-binding protein (RRM superfamily)	1	0.00204499
4	polyhydroxybutyrate depolymerase	1	0.00124688
3	Polypeptide release factor 3	1	0.000716332
3	Porin/voltage-dependent anion-selective channel protein	1	0.000716332
1	porphyrin biosynthetic process	1	0.000942507
2	porphyrin biosynthetic process	1	0.00179211
4	Possible oxidoreductase	1	0.00124688
7	Possible pfkB family carbohydrate kinase	1	0.000539374
1	potassium ion binding	1	0.000942507
4	potassium ion binding	1	0.00124688
3	pre-mRNA-processing factor 8	1	0.000716332
3	pre-mRNA-splicing helicase BRR2 [EC:3.6.4.13]	1	0.000716332
7	Predicted 3-ketosphinganine reductase	1	0.000539374
8	Predicted ABC-type transport, ATPase component/CCR4 associated factor	1	0.0011976
7	Predicted alkaloid synthase/Surface mucin Hemomucin	1	0.000539374
9	Predicted alpha/beta hydrolase	1	0.000681663
7	Predicted aminopeptidase of the M17 family	1	0.000539374
9	Predicted aminopeptidase of the M17 family	1	0.000681663
2	Predicted ATPase	1	0.00179211
1	Predicted ATPase, nucleotide-binding	1	0.000942507
9	Predicted cell surface protein homologous to bacterial outer membrane proteins	1	0.000681663
3	Predicted cyclin	1	0.000716332
1	Predicted dehydrogenase	1	0.000942507
3	Predicted dehydrogenase	1	0.000716332
5	Predicted dehydrogenase	2	0.00571429
7	Predicted dehydrogenase	2	0.00107875
3	Predicted DHHC-type Zn-finger protein	1	0.000716332
6	Predicted DHHC-type Zn-finger protein	1	0.00204499
7	Predicted DHHC-type Zn-finger protein	1	0.000539374
9	Predicted dioxygenase	1	0.000681663
3	Predicted E3 ubiquitin ligase	2	0.00143266
6	Predicted E3 ubiquitin ligase	1	0.00204499
7	Predicted E3 ubiquitin ligase	1	0.000539374
8	Predicted E3 ubiquitin ligase	1	0.0011976
9	Predicted E3 ubiquitin ligase	1	0.000681663
3	Predicted E3 ubiquitin ligase containing RING finger, subunit of transcription/repair factor TFIIH and CDK-activating kinase assembly factor	1	0.000716332
4	Predicted endo-1,3-beta-glucanase	1	0.00124688
7	Predicted endo-1,3-beta-glucanase	1	0.000539374
6	Predicted esterase of the alpha-beta hydrolase superfamily	1	0.00204499
6	Predicted exonuclease	1	0.00204499
3	Predicted exosome subunit	1	0.000716332
7	Predicted G-protein coupled receptor	1	0.000539374
5	Predicted glutathione S-transferase	1	0.00285714
7	Predicted glutathione S-transferase	1	0.000539374
6	Predicted GTP binding protein	1	0.00204499
6	Predicted GTP-binding protein (ODN superfamily)	1	0.00204499
5	Predicted guanosine polyphosphate pyrophosphohydrolase/synthase	1	0.00285714
7	Predicted guanosine polyphosphate pyrophosphohydrolase/synthase	1	0.000539374
7	Predicted haloacid-halidohydrolase and related hydrolases	1	0.000539374
3	Predicted hormone receptor interactor	1	0.000716332
7	Predicted hydrolase	1	0.000539374
1	Predicted hydrolase/acyltransferase (alpha/beta hydrolase superfamily)	1	0.000942507
3	Predicted hydrolase/acyltransferase (alpha/beta hydrolase superfamily)	1	0.000716332
4	Predicted hydrolase/acyltransferase (alpha/beta hydrolase superfamily)	1	0.00124688
7	Predicted hydrolase/acyltransferase (alpha/beta hydrolase superfamily)	3	0.00161812
8	Predicted integral membrane protein	1	0.0011976
9	Predicted integral membrane protein	1	0.000681663
1	Predicted membrane protein	2	0.00188501
2	Predicted membrane protein	2	0.00358423
3	Predicted membrane protein	1	0.000716332
5	Predicted membrane protein	3	0.00857143
7	Predicted membrane protein	1	0.000539374
8	Predicted membrane protein	1	0.0011976
9	Predicted membrane protein	1	0.000681663
9	Predicted membrane protein, contains two CBS domains	1	0.000681663
4	Predicted membrane proteins, contain hemolysin III domain	1	0.00124688
5	Predicted membrane proteins, contain hemolysin III domain	1	0.00285714
4	Predicted methyltransferase	1	0.00124688
2	Predicted mutarotase	1	0.00179211
3	Predicted N-acetyltransferase	1	0.000716332
3	Predicted N6-adenine methylase involved in transcription regulation	1	0.000716332
8	Predicted N6-adenine methylase involved in transcription regulation	1	0.0011976
1	Predicted N6-adenine RNA methylase	1	0.000942507
4	Predicted NAD synthase, contains CN hydrolase domain	1	0.00124688
7	Predicted NUDIX hydrolase FGF-2 and related proteins	1	0.000539374
2	Predicted oxidoreductase	1	0.00179211
7	Predicted oxidoreductase	1	0.000539374
1	Predicted P-loop ATPase fused to an acetyltransferase	1	0.000942507
3	Predicted patched transmembrane receptor	1	0.000716332
7	Predicted phosphoglycerate mutase	2	0.00107875
3	Predicted phospholipase	1	0.000716332
1	Predicted protein involved in nuclear export of pre-ribosomes	1	0.000942507
3	Predicted protein tyrosine phosphatase	1	0.000716332
6	Predicted regulator of the ubiquitin pathway (contains UAS and UBX domains)	1	0.00204499
6	Predicted RNA-binding protein (RRM superfamily)	1	0.00204499
9	Predicted RNA-binding protein (RRM superfamily)	1	0.000681663
4	Predicted RNA-binding protein containing PIN domain and invovled in translation or RNA processing	1	0.00124688
6	Predicted RNA-binding protein containing PIN domain and invovled in translation or RNA processing	1	0.00204499
2	Predicted RNA-binding protein Pno1p interacting with Nob1p and involved in 26S proteasome assembly	1	0.00179211
8	Predicted serine protease	1	0.0011976
7	Predicted seven transmembrane receptor - rhodopsin family	1	0.000539374
8	Predicted seven transmembrane receptor - rhodopsin family	1	0.0011976
2	Predicted signal transduction protein	1	0.00179211
6	Predicted signal transduction protein	1	0.00204499
9	Predicted signal transduction protein	1	0.000681663
4	Predicted small GTPase involved in nuclear protein import	1	0.00124688
3	Predicted small molecule transporter	1	0.000716332
7	Predicted splicing factor, SR protein superfamily	1	0.000539374
3	Predicted splicing regulator, contains RRM, SWAP and RPR domains	1	0.000716332
4	Predicted steroid reductase	1	0.00124688
1	Predicted sugar transporter	1	0.000942507
3	Predicted sugar transporter	1	0.000716332
2	Predicted transcriptional regulator	1	0.00179211
3	Predicted translation initiation factor related to eIF-3a	1	0.000716332
1	Predicted transporter (ABC superfamily)	1	0.000942507
7	Predicted transporter (ABC superfamily)	1	0.000539374
1	Predicted transporter (major facilitator superfamily)	1	0.000942507
3	Predicted transporter (major facilitator superfamily)	1	0.000716332
6	Predicted transporter (major facilitator superfamily)	2	0.00408998
7	Predicted transporter (major facilitator superfamily)	2	0.00107875
8	Predicted transporter (major facilitator superfamily)	1	0.0011976
9	Predicted transporter (major facilitator superfamily)	1	0.000681663
8	Predicted transporter ADD1 (major facilitator superfamily)	1	0.0011976
3	Predicted tubulin-tyrosine ligase	1	0.000716332
4	Predicted tubulin-tyrosine ligase	1	0.00124688
2	Predicted ubiquitin regulatory protein, contains UAS and UBX domains	1	0.00179211
6	Predicted ubiquitin-conjugating enzyme	1	0.00204499
1	Predicted UDP-galactose transporter	3	0.00282752
3	Predicted UDP-galactose transporter	3	0.002149
3	Predicted unusual protein kinase	2	0.00143266
8	Predicted Zn-finger protein	1	0.0011976
7	Prenyl protein protease	1	0.000539374
3	Prephenate dehydratase	1	0.000716332
3	preprotein translocase subunit SecA	1	0.000716332
1	Profilin	1	0.000942507
3	Prohibitin	1	0.000716332
7	Prohibitin-like protein	1	0.000539374
3	Prohibitins and stomatins of the PID superfamily	1	0.000716332
9	Prohibitins and stomatins of the PID superfamily	2	0.00136333
4	proliferating cell nuclear antigen	2	0.00249377
9	Proline oxidase	1	0.000681663
4	Proline synthetase co-transcribed protein	1	0.00124688
3	Prolyl 4-hydroxylase alpha subunit	3	0.002149
7	Prolyl 4-hydroxylase alpha subunit	2	0.00107875
3	Prolyl-tRNA synthetase	1	0.000716332
2	Prolylcarboxypeptidase (angiotensinase C)	1	0.00179211
3	Protease, Ulp1 family	1	0.000716332
9	Protease, Ulp1 family	1	0.000681663
3	Proteasome activator subunit	1	0.000716332
7	proteasome assembly	1	0.000539374
9	proteasome assembly	1	0.000681663
4	Proteasome maturation factor	1	0.00124688
7	proteasome-mediated ubiquitin-dependent protein catabolic process	1	0.000539374
1	protein ADP-ribosylation	1	0.000942507
3	protein ADP-ribosylation	1	0.000716332
4	protein ADP-ribosylation	1	0.00124688
1	Protein arginine N-methyltransferase CARM1	1	0.000942507
5	Protein arginine N-methyltransferase PRMT1 and related enzymes	1	0.00285714
7	Protein arginine N-methyltransferase PRMT1 and related enzymes	1	0.000539374
1	protein binding	35	0.0329877
2	protein binding	22	0.0394265
3	protein binding	49	0.0351003
4	protein binding	43	0.053616
5	protein binding	10	0.0285714
6	protein binding	16	0.0327198
7	protein binding	61	0.0329018
8	protein binding	33	0.039521
9	protein binding	52	0.0354465
1	protein catabolic process	1	0.000942507
7	protein catabolic process	2	0.00107875
2	Protein containing a U1-type Zn-finger and implicated in RNA splicing or processing	1	0.00179211
8	Protein containing a U1-type Zn-finger and implicated in RNA splicing or processing	1	0.0011976
1	Protein containing repeated kelch motifs	1	0.000942507
7	protein dephosphorylation	1	0.000539374
6	protein dimerization activity	1	0.00204499
1	Protein disulfide isomerase (prolyl 4-hydroxylase beta subunit)	1	0.000942507
3	Protein disulfide isomerase (prolyl 4-hydroxylase beta subunit)	1	0.000716332
7	protein disulfide oxidoreductase activity	1	0.000539374
6	Protein DRE2, required for cell viability	1	0.00204499
4	protein folding	3	0.00374065
6	protein folding	1	0.00204499
7	protein folding	2	0.00107875
9	protein folding	1	0.000681663
4	Protein geranylgeranyltransferase type II, alpha subunit	1	0.00124688
9	protein import into mitochondrial matrix	1	0.000681663
6	Protein involved in autophagocytosis during starvation	1	0.00204499
4	Protein involved in dolichol pathway for N-glycosylation (mannosyltransferase family)	1	0.00124688
2	Protein involved in glucose derepression and pre-vacuolar endosome protein sorting	1	0.00179211
7	Protein involved in membrane traffic (YOP1/TB2/DP1/HVA22 family)	1	0.000539374
8	Protein involved in mRNA turnover and stability	1	0.0011976
3	Protein involved in plasmid maintenance/nuclear protein involved in lipid metabolism	1	0.000716332
1	Protein involved in vacuolar polyphosphate accumulation, contains SPX domain	1	0.000942507
3	Protein involved in vacuolar polyphosphate accumulation, contains SPX domain	1	0.000716332
1	Protein kinase	1	0.000942507
2	protein kinase binding	1	0.00179211
7	protein kinase binding	1	0.000539374
8	protein kinase binding	1	0.0011976
2	Protein kinase C substrate, 80 KD protein, heavy chain	1	0.00179211
3	Protein kinase C substrate, 80 KD protein, heavy chain	1	0.000716332
5	Protein kinase containing WD40 repeats	1	0.00285714
7	Protein kinase PCTAIRE and related kinases	1	0.000539374
7	Protein kinase PITSLRE and related kinases	1	0.000539374
6	Protein Mei2, essential for commitment to meiosis, and related proteins	1	0.00204499
4	protein modification process	1	0.00124688
7	protein modification process	1	0.000539374
8	protein modification process	1	0.0011976
9	protein modification process	1	0.000681663
6	protein Mpv17	1	0.00204499
3	protein N-linked glycosylation	1	0.000716332
2	Protein phosphatase 1, regulatory subunit, and related proteins	1	0.00179211
3	Protein phosphatase 2 regulatory subunit	1	0.000716332
3	Protein phosphatase 2A regulatory subunit A and related proteins	1	0.000716332
6	Protein phosphatase 2A regulatory subunit A and related proteins	1	0.00204499
1	protein phosphorylation	7	0.00659755
2	protein phosphorylation	4	0.00716846
3	protein phosphorylation	7	0.00501433
4	protein phosphorylation	4	0.00498753
5	protein phosphorylation	3	0.00857143
7	protein phosphorylation	8	0.00431499
8	protein phosphorylation	5	0.00598802
9	protein phosphorylation	8	0.00545331
1	Protein required for 18S rRNA maturation and 40S ribosome biogenesis	1	0.000942507
7	Protein required for 18S rRNA maturation and 40S ribosome biogenesis	1	0.000539374
7	Protein required for fusion of vesicles in vesicular transport, alpha-SNAP	1	0.000539374
9	Protein required for meiotic chromosome segregation	1	0.000681663
7	protein serine/threonine kinase activity	1	0.000539374
1	protein transport	1	0.000942507
2	protein transport	2	0.00358423
7	protein transport	5	0.00269687
8	protein transport	1	0.0011976
9	Protein transporter of the TRAM (translocating chain-associating membrane) superfamily	1	0.000681663
1	Protein tyrosine phosphatase, contains fn3 domain	1	0.000942507
1	protein tyrosine/serine/threonine phosphatase activity	1	0.000942507
4	protein tyrosine/serine/threonine phosphatase activity	1	0.00124688
5	protein tyrosine/serine/threonine phosphatase activity	1	0.00285714
9	protein tyrosine/serine/threonine phosphatase activity	1	0.000681663
3	protein ubiquitination	1	0.000716332
7	protein ubiquitination	1	0.000539374
9	protein ubiquitination	1	0.000681663
1	protein-phycocyanobilin linkage	1	0.000942507
8	Proteins containing BTB/POZ and Kelch domains, involved in regulatory/signal transduction processes	1	0.0011976
9	Proteins containing BTB/POZ and Kelch domains, involved in regulatory/signal transduction processes	4	0.00272665
3	Proteins containing regions of low-complexity	1	0.000716332
6	Proteins containing regions of low-complexity	1	0.00204499
7	Proteins containing the FAD binding domain	1	0.000539374
1	proteolysis	6	0.00565504
2	proteolysis	5	0.00896057
3	proteolysis	9	0.00644699
4	proteolysis	3	0.00374065
5	proteolysis	3	0.00857143
6	proteolysis	9	0.0184049
7	proteolysis	6	0.00323625
8	proteolysis	3	0.00359281
9	proteolysis	4	0.00272665
4	Protoheme ferro-lyase (ferrochelatase)	1	0.00124688
4	Protoporphyrinogen oxidase	1	0.00124688
4	Pseudouridine synthase	1	0.00124688
1	pseudouridine synthesis	1	0.000942507
7	pseudouridine synthesis	1	0.000539374
1	pteridine and derivative biosynthetic process	1	0.000942507
3	Puromycin-sensitive aminopeptidase and related aminopeptidases	1	0.000716332
4	Purple acid phosphatase	1	0.00124688
9	Purple acid phosphatase	1	0.000681663
4	Putative ATP-dependent Clp-type protease (AAA+ ATPase superfamily)	1	0.00124688
1	Putative cargo transport protein ERV29	1	0.000942507
7	Putative cytochrome C oxidase assembly protein	1	0.000539374
1	Putative GTPase activating proteins (GAPs)	1	0.000942507
3	Putative methionine aminopeptidase	1	0.000716332
7	Putative N2,N2-dimethylguanosine tRNA methyltransferase	1	0.000539374
6	Putative RNA binding protein	1	0.00204499
1	Putative SAM-dependent rRNA methyltransferase SPB1	1	0.000942507
3	Putative serine/threonine protein kinase	1	0.000716332
6	Putative signal transduction protein involved in RNA splicing	1	0.00204499
8	putative transcription factor	1	0.0011976
1	Putative transcription factor 5qNCA, contains JmjC domain	1	0.000942507
7	Putative transcriptional regulator DJ-1	1	0.000539374
6	Putative u4/u6 small nuclear ribonucleoprotein	1	0.00204499
7	Putative u4/u6 small nuclear ribonucleoprotein	1	0.000539374
1	Putative Xaa-Pro aminopeptidase	1	0.000942507
7	Putative zinc transporter	1	0.000539374
5	Putative Zn-finger protein	1	0.00285714
7	Putative Zn-finger protein	1	0.000539374
1	pyridoxal phosphate binding	1	0.000942507
3	pyridoxal phosphate binding	2	0.00143266
4	pyridoxal phosphate binding	2	0.00249377
7	pyridoxal phosphate binding	1	0.000539374
8	pyridoxal phosphate binding	1	0.0011976
9	pyridoxal phosphate binding	1	0.000681663
5	pyrophosphatase activity	1	0.00285714
1	Pyrophosphate-dependent phosphofructo-1-kinase	1	0.000942507
2	Pyrophosphate-dependent phosphofructo-1-kinase	1	0.00179211
3	Pyrroline-5-carboxylate reductase	1	0.000716332
5	pyruvate carboxylase [EC:6.4.1.1]	1	0.00285714
3	Pyruvate dehydrogenase E1, alpha subunit	1	0.000716332
4	Pyruvate dehydrogenase E1, alpha subunit	1	0.00124688
5	Pyruvate dehydrogenase E1, alpha subunit	1	0.00285714
2	Pyruvate dehydrogenase E1, beta subunit	1	0.00179211
3	Pyruvate dehydrogenase E1, beta subunit	1	0.000716332
1	pyruvate dehydrogenase E2 component (dihydrolipoamide acetyltransferase) [EC:2.3.1.12]	1	0.000942507
3	pyruvate dehydrogenase kinase 2/3/4 [EC:2.7.11.2]	1	0.000716332
6	Pyruvate kinase	1	0.00204499
3	pyruvate kinase [EC:2.7.1.40]	1	0.000716332
4	pyruvate kinase activity	1	0.00124688
2	R-kappa-B and related transcription factors	1	0.00179211
9	Rab GTPase interacting factor, Golgi membrane protein	1	0.000681663
3	RAB proteins geranylgeranyltransferase component A (RAB escort protein)	2	0.00143266
3	Rab6 GTPase activator GAPCenA and related TBC domain proteins	1	0.000716332
5	Rab6 GTPase activator GAPCenA and related TBC domain proteins	1	0.00285714
7	Rab6 GTPase activator GAPCenA and related TBC domain proteins	1	0.000539374
7	racemase activity, acting on amino acids and derivatives	1	0.000539374
1	Ras-related small GTPase, Rho type	1	0.000942507
1	Rb (Retinoblastoma tumor suppressor)-related protein	1	0.000942507
3	Regucalcin gene promoter region-related protein (RGPR)	1	0.000716332
2	regulation of angiogenesis	1	0.00179211
1	regulation of ARF protein signal transduction	1	0.000942507
2	regulation of Rho protein signal transduction	2	0.00358423
3	regulation of Rho protein signal transduction	1	0.000716332
4	regulation of Rho protein signal transduction	1	0.00124688
6	regulation of Rho protein signal transduction	1	0.00204499
8	regulation of signal transduction	1	0.0011976
1	regulation of transcription, DNA-dependent	3	0.00282752
2	regulation of transcription, DNA-dependent	1	0.00179211
3	regulation of transcription, DNA-dependent	4	0.00286533
4	regulation of transcription, DNA-dependent	1	0.00124688
5	regulation of transcription, DNA-dependent	1	0.00285714
6	regulation of transcription, DNA-dependent	2	0.00408998
7	regulation of transcription, DNA-dependent	1	0.000539374
9	regulation of transcription, DNA-dependent	5	0.00340832
7	regulation of viral transcription	1	0.000539374
7	Regulator of nuclear mRNA	1	0.000539374
9	Replication factor C, subunit RFC1 (large subunit)	1	0.000681663
1	Replication factor C, subunit RFC3	1	0.000942507
4	Replication factor C, subunit RFC5	1	0.00124688
4	replicative DNA helicase [EC:3.6.4.12]	1	0.00124688
3	retrograde transport, endosome to Golgi	1	0.000716332
4	retrograde transport, endosome to Golgi	1	0.00124688
5	Rho GTPase effector BNI1 and related formins	1	0.00285714
1	Rho guanyl-nucleotide exchange factor activity	1	0.000942507
2	RhoA GTPase effector DIA/Diaphanous	1	0.00179211
6	Riboflavin kinase	1	0.00204499
4	riboflavin synthase activity	1	0.00124688
4	Ribokinase	1	0.00124688
6	ribonuclease activity	2	0.00408998
7	Ribonuclease H	1	0.000539374
7	ribonuclease H activity	1	0.000539374
7	ribonuclease III activity	2	0.00107875
4	ribonuclease T2 activity	1	0.00124688
2	Ribonucleotide reductase, alpha subunit	1	0.00179211
4	Ribonucleotide reductase, alpha subunit	1	0.00124688
3	Ribonucleotide reductase, beta subunit	1	0.000716332
3	ribose phosphate diphosphokinase activity	1	0.000716332
7	Ribose-phosphate pyrophosphokinase	1	0.000539374
2	Ribosomal protein RPL1/RPL2/RL4L4	1	0.00179211
2	Ribosomal protein S4	1	0.00179211
3	Ribosomal protein S6 kinase and related proteins	1	0.000716332
1	ribosome	3	0.00282752
8	ribosome	1	0.0011976
2	Ribosome Assembly protein	1	0.00179211
3	Ribosome biogenesis protein - Nop56p/Sik1p	1	0.000716332
7	Ribosome biogenesis protein RPF1, contains IMP4 domain	1	0.000539374
3	Ribulose kinase and related carbohydrate kinases	1	0.000716332
4	ribulose-phosphate 3-epimerase [EC:5.1.3.1]	1	0.00124688
1	RNA binding	4	0.00377003
3	RNA binding	6	0.00429799
4	RNA binding	3	0.00374065
6	RNA binding	1	0.00204499
7	RNA binding	7	0.00377562
8	RNA binding	2	0.00239521
9	RNA binding	2	0.00136333
1	RNA helicase	1	0.000942507
3	RNA helicase	1	0.000716332
4	RNA helicase	1	0.00124688
9	RNA helicase	1	0.000681663
3	RNA helicase nonsense mRNA reducing factor (pNORF1)	1	0.000716332
2	RNA lariat debranching enzyme	1	0.00179211
3	RNA metabolic process	1	0.000716332
6	RNA metabolic process	1	0.00204499
2	RNA methyltransferase activity	1	0.00179211
7	RNA polyadenylation	1	0.000539374
2	RNA polymerase I transcription factor	1	0.00179211
1	RNA polymerase I-associated factor - PAF67	1	0.000942507
1	RNA polymerase I, large subunit	1	0.000942507
3	RNA polymerase I, large subunit	1	0.000716332
7	RNA polymerase II assessory factor Cdc73p	1	0.000539374
7	RNA polymerase II subunit 9	1	0.000539374
3	RNA polymerase II transcription elongation factor DSIF/SUPT5H/SPT5	1	0.000716332
4	RNA polymerase II transcription elongation factor Elongin/SIII, subunit elongin C	1	0.00124688
3	RNA polymerase II transcription initiation/nucleotide excision repair factor TFIIH, 3'-5' helicase subunit SSL2	1	0.000716332
8	RNA polymerase II transcription initiation/nucleotide excision repair factor TFIIH, 3'-5' helicase subunit SSL2	1	0.0011976
6	RNA polymerase II transcription initiation/nucleotide excision repair factor TFIIH, 5'-3' helicase subunit RAD3	1	0.00204499
7	RNA polymerase II transcription initiation/nucleotide excision repair factor TFIIH, subunit TFB2	1	0.000539374
1	RNA polymerase II transcription termination factor TTF2/lodestar, DEAD-box superfamily	1	0.000942507
1	RNA polymerase II, large subunit	1	0.000942507
3	RNA polymerase II, large subunit	1	0.000716332
1	RNA polymerase II, second largest subunit	1	0.000942507
4	RNA polymerase II, second largest subunit	1	0.00124688
7	RNA polymerase II, second largest subunit	2	0.00107875
7	RNA polymerase II, subunit POLR2C/RPB3	1	0.000539374
6	RNA polymerase III, subunit C34	1	0.00204499
2	RNA polymerase, 25-kDa subunit (common to polymerases I, II and III)	1	0.00179211
9	RNA polymerase, subunit L	1	0.000681663
7	RNA processing	1	0.000539374
7	RNA pseudouridylate synthases	1	0.000539374
5	RNA splicing	1	0.00285714
3	RNA splicing factor - Slu7p	1	0.000716332
6	RNA splicing factor - Slu7p	1	0.00204499
4	RNA-binding protein Bicaudal-C	1	0.00124688
1	RNA-binding protein La	1	0.000942507
7	RNA-binding protein NOVA1/PASILLA and related KH domain proteins	1	0.000539374
3	RNA-binding protein RBM8/Tsunagi (RRM superfamily)	1	0.000716332
1	RNA-binding protein required for 60S ribosomal subunit biogenesis	1	0.000942507
1	RNA-binding protein required for biogenesis of the ribosomal 60S subunit	1	0.000942507
3	RNA-binding proteins	1	0.000716332
7	RNA-binding Ran Zn-finger protein and related proteins	1	0.000539374
3	RNAse L inhibitor, ABC superfamily	1	0.000716332
7	RRM motif-containing protein	1	0.000539374
7	rRNA (adenine-N6,N6-)-dimethyltransferase activity	1	0.000539374
1	rRNA processing protein	1	0.000942507
9	S-adenosylhomocysteine hydrolase	1	0.000681663
3	S-adenosylmethionine decarboxylase [EC:4.1.1.50]	1	0.000716332
7	S-adenosylmethionine-dependent methyltransferase activity	1	0.000539374
4	Salt-sensitive 3'-phosphoadenosine-5'-phosphatase HAL2/SAL1	1	0.00124688
3	SAM-dependent methyltransferases	1	0.000716332
6	SAM-dependent methyltransferases	1	0.00204499
3	selection of site for barrier septum formation	1	0.000716332
2	Selenocysteine-specific elongation factor	1	0.00179211
3	Selenoprotein T	1	0.000716332
3	Sensory cilia assembly protein	1	0.000716332
5	Septin family protein (P-loop GTPase)	1	0.00285714
1	Septins (P-loop GTPases)	1	0.000942507
3	sequence-specific DNA binding	2	0.00143266
2	Serine carboxypeptidases (lysosomal cathepsin A)	1	0.00179211
3	Serine carboxypeptidases (lysosomal cathepsin A)	1	0.000716332
7	Serine carboxypeptidases (lysosomal cathepsin A)	1	0.000539374
3	Serine O-acetyltransferase	1	0.000716332
3	Serine palmitoyltransferase	1	0.000716332
2	Serine protease	2	0.00358423
4	Serine protease	1	0.00124688
5	Serine protease	1	0.00285714
9	Serine protease	1	0.000681663
6	Serine-threonine phosphatase 2A, catalytic subunit	1	0.00204499
3	serine-type endopeptidase inhibitor activity	1	0.000716332
7	serine-type endopeptidase inhibitor activity	1	0.000539374
7	serine-type exopeptidase activity	1	0.000539374
1	serine-type peptidase activity	2	0.00188501
4	serine-type peptidase activity	1	0.00124688
7	serine-type peptidase activity	3	0.00161812
8	serine-type peptidase activity	1	0.0011976
9	serine-type peptidase activity	1	0.000681663
4	Serine/threonine kinase (haspin family)	1	0.00124688
7	Serine/threonine kinase receptor-associated protein	1	0.000539374
1	Serine/threonine protein kinase	3	0.00282752
2	Serine/threonine protein kinase	3	0.00537634
3	Serine/threonine protein kinase	5	0.00358166
6	Serine/threonine protein kinase	1	0.00204499
9	Serine/threonine protein kinase	1	0.000681663
3	Serine/threonine protein kinase involved in cell cycle control	1	0.000716332
6	Serine/threonine protein kinase, contains leucine zipper domain	2	0.00408998
2	Serine/threonine protein kinase/TGF-beta stimulated factor	1	0.00179211
1	Serine/threonine protein phosphatase	1	0.000942507
3	Serine/threonine protein phosphatase	4	0.00286533
5	Serine/threonine protein phosphatase	2	0.00571429
7	Serine/threonine protein phosphatase	1	0.000539374
8	Serine/threonine protein phosphatase	1	0.0011976
3	Serine/threonine protein phosphatase 2A, regulatory subunit	2	0.00143266
3	Serine/threonine specific protein phosphatase involved in glycogen accumulation, PP2A-related	1	0.000716332
3	seryl-tRNA synthetase [EC:6.1.1.11]	1	0.000716332
3	Short-chain acyl-CoA dehydrogenase	1	0.000716332
2	Sialyltransferase	1	0.00179211
8	Sialyltransferase	1	0.0011976
2	sialyltransferase activity	1	0.00179211
3	sialyltransferase activity	1	0.000716332
4	sialyltransferase activity	2	0.00249377
7	sialyltransferase activity	1	0.000539374
4	Sideroflexin	1	0.00124688
1	signal peptide processing	1	0.000942507
3	Signal recognition particle receptor, alpha subunit	1	0.000716332
7	Signal recognition particle receptor, beta subunit (small G protein superfamily)	1	0.000539374
3	Signal recognition particle, subunit Srp68	1	0.000716332
1	Signal recognition particle, subunit Srp72	1	0.000942507
[truncated: 497 more rows]
