# Supplementary material for: Genome-resolved biogeography of Phaeocystales, cosmopolitan bloom-forming algae
Source: Research Square preprint supplement (doi:10.21203/rs.3.rs-4339559/v1), 2024-06-11
Supplement: Supplementary file 5 [file 54f8a356af8bd30dccee200b.xlsx]

## Sheet: Supplementary Table S3
Supplementary Table S3: Datasets used in this study. Sampling cruises, their basic parameters, and references are listed. Only data for samples selected for this study are shown; we selected samples with good representation of relevant size fractions (e.g. Baltic Sea, Tara Oceans and Tara Arctic) and from the euphotic zone.
Cruise	Baltic Sea	Baltic Sea	Ciclops	NCOG	Pole2pole	Tara Oceans+Arctic	Tara Oceans+Arctic
Type	metaG	metaT	metaT-totalRNA	metaT-polyA	metaT-totalRNA	metaG	metaT-totalRNA
Stations	11	8	6	56	76	92	74
Samples	38	36	78	307	76	593	445
Filter Sizes	0.8-3 um,3-200 um	0.8-3 um,3-200 um	0.2-3 um, 3-51 um, 51-200 um	>0.2 um	1.2-100 um	multiple; range 0.8-2000 um	multiple; range 0.8-2000 um
Read total	15.6M	259.5M	2.7G	9.2G	4G	105.7G	73.7G
Reference	[1]	[1]	[2]	[3]	[4]	[5]	[5]
[1] Dataset from a brackish transect of the Bay of Oslo and the Baltic Sea; Zeigler-Allen et al., 2017
[2] Dataset from Amundsen and Ross Seas from December 2017 to March 2018; Saito and DiTullio, 2022
[3] Dataset from California Current Ecosystem - CalCOFI; James et al., 2022
[4] Dataset from a meridional transect of the Atlantic Ocean; Martin et al., 2021
[5] Dataset sampling the diversity in world oceans; Salazar et al. 2019

## Sheet: genome assemblies
Genome assemblies used for Pfam enrichment, transporter comparison, and phylogeny*
code	file	reference	availability
Auran1	Auran1_FilteredModels3.faa	10.1073/pnas.1016106108	public
ChlNC64A_1	Chlorella_NC64A.best_proteins.faa	10.1105/tpc.110.076406	public
Chlre4	Chlre4.faa	10.1126/science.1143609	public
Chrpa1	Chrpa1_GeneCatalog.faa	10.1016/j.algal.2018.11.023	public
Chrsp1	Chrsp_1_GeneCatalog_proteins_20180813.faa	10.1371/journal.pgen.1005469	public
Coc_C169	Coccomyxa_C169_v2_filtered_proteins.faa	10.1186/gb-2012-13-5-r39	public
Cvel	cvel.faa	10.7554/eLife.06974	public; cryptoDB
Emihu1	Emihu1_reduced_proteins.faa	10.1038/nature12221	public
Galsul	Galsul_ASM34128v1_protein.faa	10.1126/science.1231707	GenBank
Gchor	Gracilariopsis_chorda_GraCho1.0_proteins.faa	10.1093/molbev/msy081	GenBank
Guith1	Guillardia_theta.Guith1.faa	10.1038/nature11681	GenBank
MicpuC3v2	MicpuC3v2_GeneCatalog_proteins_20160125.faa	10.1126/science.1167222	public
Nanoce1779_2	Nanoce1779_2_GeneCatalog_proteins_20180119.faa		with permission from Krishna Niyogi and Yasuo Yoshikuni
Ost9901_3	O.lucimarinus.FM.faa		with permission from Brian Palenik
Pavlov2436_1	Pavlov2436_GeneCatalog.faa	10.26508/lsa.202201833	with permission from Connie Lovejoy
Pelago2097_1	PelagoCCMP2097.all.faa	10.26508/lsa.202201833	with permission from Connie Lovejoy
Phaant1	Phaant1_20181014.faa	this study
Phacord1	Phacord1_20201125.faa	this study
Phaglo1	Phaglo1_20181013.faa	this study
Phaeosis	Phaeocystis-sister2.95.faa	10.1016/j.xgen.2022.100123	public
Phatr3	Phaeodactylum_tricornutum.ASM15095v2.faa	10.1038/nature07410	public
Porpu2	Porphyridium_purpureum_v2_proteins.faa	10.1038/ncomms2931	public
Thaoc	Thaoc.faa	10.1186/1471-2164-11-718	public
Thaps1	Thalassiosira_pseudonana.ASM14940v2.faa	10.1038/nature07410	GenBank
Vbra	vbra.faa	10.7554/eLife.06974	public; cryptoDB
	*other taxa from EukProt v3	https://doi.org/10.6084/m9.figshare.12417881.v3

## Sheet: processed reads
Total processed reads by biosample
Baltic metaG			Baltic metaT			Tara metaG			Tara metaT			Ciclops			Atlantic Pole2pole				NCOG
GS659_0p8	760979		SAMN04943350	2987249		SAMEA2189650	64298223		SAMEA2591060	129259733		SAMN31286436	13603103		ANT-10_RNA	SAMN10643578	48017264		NR0001	SAMN40464821	24140182
GS659_3p0	695920		SAMN04943351	12391616		SAMEA2189652	56587548		SAMEA2591077	172368575		SAMN31286437	46608431		ANT-11_RNA	SAMN11533421	43322638		NR0002	SAMN40464822	27372610
GS660_0p8	535155		SAMN04943353	1293959		SAMEA2189654	68515289		SAMEA2591078	134313519		SAMN31286438	39293119		ANT-12_RNA	SAMN11528538	59190619		NR0003	SAMN40464823	29826253
GS660_3p0	357289		SAMN04943354	2502683		SAMEA2189665	79924639		SAMEA2591093	209116088		SAMN31286445	27257203		ANT-13_RNA	SAMN11532195	54082451		NR0004	SAMN40464824	31061346
GS665_0p8	281337		SAMN04943355	14506166		SAMEA2189666	199344327		SAMEA2591096	7830569		SAMN31286446	62028605		ANT-14_RNA	SAMN11532532	37479934		NR0005	SAMN40464825	26764465
GS665_3p0	304794		SAMN04943357	1075925		SAMEA2189667	86987246		SAMEA2591103	207076761		SAMN31286447	118415746		ANT-15_RNA	SAMN07687300,SAMN07687605	91449495		NR0006	SAMN40464826	27588372
GS666_0p8	446246		SAMN04943358	1298463		SAMEA2189668	86099866		SAMEA2591106	13248825		SAMN31286448	24124205		ANT-16_RNA	SAMN11533420	57620579		NR0007	SAMN40464827	30282480
GS666_3p0	493919		SAMN04943359	10565319		SAMEA2189669	185373213		SAMEA2591116	172587027		SAMN31286449	15609627		ANT-1_RNA	SAMN10643580	35267961		NR0008	SAMN40464828	29451224
GS667_0p8	178960		SAMN04943360	3335376		SAMEA2189670	300943757		SAMEA2591117	3652410		SAMN31286450	23401219		ANT-2_RNA	SAMN11532183	41872850		NR0009	SAMN40464829	18445847
GS667_3p0	243557		SAMN04943362	1898080		SAMEA2189671	107601477		SAMEA2591130	6300076		SAMN31286439	34419235		ANT-3_RNA	SAMN10643579	44715118		NR0010	SAMN40464830	13979739
GS673_0p8	699628		SAMN04943363	2383287		SAMEA2189672	68121499		SAMEA2591131	1946493		SAMN31286440	48485875		ANT-4_RNA	SAMN11532186	35530847		NR0011	SAMN40464831	31427967
GS673_3p0	173258		SAMN04943364	12449027		SAMEA2591063	201318051		SAMEA2611379	218960849		SAMN31286441	36750888		ANT-5_RNA	SAMN10712492	53280608		NR0012	SAMN40464832	20480943
GS674_0p8	239007		SAMN04943366	3217930		SAMEA2591077	197279706		SAMEA2611380	160073945		SAMN31286442	38581927		ANT-7_RNA	SAMN11096701	56465845		NR0013	SAMN40464833	27322372
GS674_3p0	275407		SAMN04943367	4128824		SAMEA2591082	212140358		SAMEA2611381	193748566		SAMN31286443	34181731		ANT-8_RNA	SAMN11532202	39570091		NR0014	SAMN40464834	20021204
GS677_0p8	418347		SAMN04943368	5907605		SAMEA2591093	198522116		SAMEA2611383	214321492		SAMN31286444	13895921		ANT-9_RNA	SAMN11096700	46548591		NR0015	SAMN40464835	26889936
GS677_3p0	510491		SAMN04943371	2183606		SAMEA2591094	204887834		SAMEA2611384	212468475		SAMN31286451	31831169		ARK-118M_RNA	SAMN09091569	66141997		NR0016	SAMN40464836	24356329
GS679_0p8	1180834		SAMN04943372	7851697		SAMEA2591103	254305326		SAMEA2611385	206658957		SAMN31286452	20509376		ARK-120M_RNA	SAMN08777218	52897789		NR0017	SAMN40464837	26904713
GS679_3p0	242722		SAMN04943376	10262237		SAMEA2591104	206600171		SAMEA2619396	210175124		SAMN31286453	37095048		ARK-122M_RNA	SAMN09092560	62541715		NR0023	SAMN40464838	34711764
GS681_0p8	397495		SAMN04943378	24385837		SAMEA2591115	215014987		SAMEA2619398	172118257		SAMN31286460	21764117		ARK-130M_RNA	SAMN09091568	47795734		NR0024	SAMN40464839	24335378
GS681_3p0	445876		SAMN04943379	1757686		SAMEA2591116	155356395		SAMEA2619419	207627369		SAMN31286461	3803880		ARK-132M_RNA	SAMN09091567	39637487		NR0025	SAMN40464840	29025873
GS682_0p8	390262		SAMN04943380	11266776		SAMEA2591128	213448308		SAMEA2619421	199895092		SAMN31286462	44137038		ARK-132S_RNA	SAMN09092561	45096024		NR0027	SAMN40464841	28876448
GS682_3p0	225255		SAMN04943382	2469797		SAMEA2591129	212889000		SAMEA2619623	146755843		SAMN31286463	18325058		ARK-135M_RNA	SAMN09092594	35608898		NR0028	SAMN40464842	30316933
GS683_0p8	222192		SAMN04943383	2185717		SAMEA2611378	233696593		SAMEA2619675	171859934		SAMN31286464	4976077		ARK-149M_RNA	SAMN09091576	46270655		NR0029	SAMN40464843	26050317
GS683_3p0	628070		SAMN04943384	6356979		SAMEA2611379	213841498		SAMEA2619676	186240486		SAMN31286465	47839926		ARK-15M_RNA	SAMN09092596	56221923		NR0031	SAMN40464844	27730278
GS684_0p8	559200		SAMN04943386	3414521		SAMEA2611380	223830672		SAMEA2619684	161489681		SAMN31286454	12173505		ARK-1M_RNA	SAMN09092376	46560673		NR0032	SAMN40464845	30680633
GS684_3p0	288368		SAMN04943387	993621		SAMEA2611381	242627551		SAMEA2619685	135024071		SAMN31286455	19406542		ARK-1S_RNA	SAMN09091575	40040687		NR0033	SAMN40464846	23751413
GS685_0p8	796299		SAMN04943388	5457412		SAMEA2611382	219480852		SAMEA2619745	211235834		SAMN31286456	21251060		ARK-20M_RNA	SAMN09092744	59699484		NR0035	SAMN40464847	28076406
GS685_3p0	166408		SAMN04943390	4061699		SAMEA2611383	179472085		SAMEA2619746	174542537		SAMN31286457	8997333		ARK-27M_RNA	SAMN09092557	47496989		NR0036	SAMN40464848	27876178
GS686_0p8	312936		SAMN04943391	8246444		SAMEA2611384	149724616		SAMEA2619754	215459179		SAMN31286458	59656453		ARK-2M_RNA	SAMN09091623	42863179		NR0037	SAMN40464849	23072093
GS686_3p0	637940		SAMN04943392	12488178		SAMEA2611385	215234081		SAMEA2619755	190578793		SAMN31286459	20202761		ARK-2S_RNA	SAMN09092742	47278964		NR0038	SAMN40464850	19700752
GS687_0p8	301641		SAMN04943394	3546255		SAMEA2619396	181437081		SAMEA2619777	148300981		SAMN31286475	10285204		ARK-37M_RNA	SAMN09091572	61542276		NR0039	SAMN40464851	26945510
GS687_3p0	273835		SAMN04943395	2097227		SAMEA2619398	186521704		SAMEA2619778	175780243		SAMN31286476	46877488		ARK-3M_RNA	SAMN09092743	50493131		NR0040	SAMN40464852	25025613
GS688_0p8	288929		SAMN04943396	13243497		SAMEA2619419	184829942		SAMEA2619788	162197563		SAMN31286477	18551855		ARK-3S_RNA	SAMN09091574	56366213		NR0041	SAMN40464853	24546515
GS688_3p0	532217		SAMN04943398	5889028		SAMEA2619421	205747337		SAMEA2619789	173170079		SAMN31286478	16843669		ARK-51M_RNA	SAMN09091571	47614585		NR0042	SAMN40464854	22845664
GS694_0p8	213977		SAMN04943399	3594460		SAMEA2619505	166057516		SAMEA2619943	182462985		SAMN31286479	37956521		ARK-55S_RNA	SAMN09092558	47455020		NR0043	SAMN40464855	22371277
GS694_3p0	226654		SAMN04943400	47806488		SAMEA2619507	215426495		SAMEA2619958	181653103		SAMN31286480	5279712		ARK-5M_RNA	SAMN07687107,SAMN07687301	85096807		NR0044	SAMN40464856	25712396
GS695_0p8	361659					SAMEA2619522	192979647		SAMEA2619959	165818249		SAMN31286469	17976057		ARK-61M_RNA	SAMN09092559	44895360		NR0046	SAMN40464857	23310539
GS695_3p0	334579					SAMEA2619623	183487302		SAMEA2620071	186678569		SAMN31286470	12283667		ARK-63M_RNA	SAMN09091570	39733681		NR0047	SAMN40464858	24778074
						SAMEA2619675	168978860		SAMEA2620072	141497293		SAMN31286471	301079		ARK-7M_RNA	SAMN06268696,SAMN07687106,SAMN07687565	152748531		NR0048	SAMN40464859	26998864
						SAMEA2619676	182836931		SAMEA2620089	131444933		SAMN31286472	13831537		ARK-87M_RNA	SAMN09092595	49524266		NR0049	SAMN40464860	22690974
						SAMEA2619684	172313724		SAMEA2620204	127069915		SAMN31286473	3994778		ARK-8M_RNA	SAMN09091573	49451945		NR0052	SAMN40464861	32381941
						SAMEA2619685	176382416		SAMEA2620205	150297544		SAMN31286474	9702797		PS103-11_RNA	SAMN10865508	67815080		NR0053	SAMN40464862	28002154
						SAMEA2619745	205419622		SAMEA2620378	200722904		SAMN31286493	31048983		PS103-14_RNA	SAMN10864933	58420758		NR0054	SAMN40464863	15907257
						SAMEA2619746	152747480		SAMEA2620379	156246157		SAMN31286494	28707039		PS103-17_RNA	SAMN10864895	87686731		NR0056	SAMN40464864	24229349
						SAMEA2619754	161253354		SAMEA2620418	202099438		SAMN31286495	26475545		PS103-1R1_RNA	SAMN10864910	48588903		NR0057	SAMN40464865	19197331
						SAMEA2619755	161449029		SAMEA2620500	191317468		SAMN31286487	27791733		PS103-23_RNA	SAMN10864932	59562250		NR0058	SAMN40464866	11199504
						SAMEA2619777	185404639		SAMEA2620523	124065613		SAMN31286488	17241791		PS103-27_RNA	SAMN10864857	66370208		NR0060	SAMN40464867	29394668
						SAMEA2619778	175924502		SAMEA2620526	135529382		SAMN31286489	21866716		PS103-29_RNA	SAMN10864858	60157028		NR0061	SAMN40464868	25101166
						SAMEA2619788	175133260		SAMEA2620556	152614979		SAMN31286490	22976390		PS103-2R1_RNA	SAMN10864909	65307438		NR0062	SAMN40464869	20073738
						SAMEA2619789	184820422		SAMEA2620581	150812588		SAMN31286491	38179392		PS103-3R1_RNA	SAMN10864908	117243451		NR0064	SAMN40464870	26284258
						SAMEA2619811	156807213		SAMEA2620802	120351025		SAMN31286492	6909010		PS103-4R2_RNA	SAMN10864867	89595454		NR0065	SAMN40464871	24290575
						SAMEA2619832	150373231		SAMEA2620846	130022090		SAMN31286511	41654341		PS103-59_RNA	SAMN10864931	50488063		NR0066	SAMN40464872	17728597
						SAMEA2619850	195018314		SAMEA2620865	181297880		SAMN31286512	44344681		PS103-5R1_RNA	SAMN10865507	56043143		NR0068	SAMN40464873	25432494
						SAMEA2619916	156799389		SAMEA2620871	168337601		SAMN31286513	61526422		PS103-6_RNA	SAMN10864868	66358025		NR0069	SAMN40464874	26185871
						SAMEA2619917	183083265		SAMEA2620907	165102164		SAMN31286514	20431943		PS103-7_RNA	SAMN10864904	57027912		NR0072	SAMN40464875	26871942
						SAMEA2619918	176013855		SAMEA2620939	157195625		SAMN31286515	71839886		S0_RNA	SAMN09092781	43770100		NR0073	SAMN40464876	27120155
						SAMEA2619943	150050385		SAMEA2620941	143811442		SAMN31286516	1486109		S11_RNA	SAMN09091581	44307528		NR0076	SAMN40464877	27023687
						SAMEA2619958	155743465		SAMEA2620959	146515464		SAMN31286505	17854361		S13_RNA	SAMN09091580	43057994		NR0077	SAMN40464878	25077240
						SAMEA2619959	361723462		SAMEA2620961	165087031		SAMN31286506	37171010		S15_RNA	SAMN09092377	34060160		NR0080	SAMN40464879	38234798
						SAMEA2620071	152608168		SAMEA2620988	147095476		SAMN31286507	30108514		S17_RNA	SAMN09092246	49503578		NR0081	SAMN40464880	27540812
						SAMEA2620072	360520254		SAMEA2621029	158295115		SAMN31286508	21527025		S18_RNA	SAMN09092749	57816294		NR0084	SAMN40464881	25856845
						SAMEA2620084	193956529		SAMEA2621048	187043604		SAMN31286509	67308128		S1_RNA	SAMN09091566	33345014		NR0085	SAMN40464882	25785093
						SAMEA2620089	181139957		SAMEA2621055	157188416		SAMN31286510	49657514		S2-C18_RNA	SAMN09092733	41968273		NR0086	SAMN40464883	40649335
						SAMEA2620204	197960850		SAMEA2621082	170366429		SAMN31286427	9685865		S2-C1_RNA	SAMN09091565	39200494		NR0087	SAMN40464884	29412771
						SAMEA2620205	334705228		SAMEA2621136	54119233		SAMN31286428	99347344		S20_RNA	SAMN09091579	46353236		NR0088	SAMN40464885	23230359
						SAMEA2620249	145573797		SAMEA2621169	146006783		SAMN31286429	113117270		S21_RNA	SAMN09092750	33216383		NR0091	SAMN40464886	27168703
						SAMEA2620267	175710412		SAMEA2621198	127392110		SAMN31286430	8434215		S23_RNA	SAMN09091578	43129149		NR0092	SAMN40464887	34327627
						SAMEA2620354	189897479		SAMEA2621218	109508189		SAMN31286431	4472681		S25_RNA	SAMN09092751	41900361		NR0093	SAMN40464888	27513512
						SAMEA2620355	181562872		SAMEA2621254	103668595		SAMN31286432	30428640		S27_RNA	SAMN09091648	51167568		NR0095	SAMN40464889	27255954
						SAMEA2620418	181813582		SAMEA2621274	138253743		SAMN31286433	9933261		S29_RNA	SAMN09092752	42852703		NR0096	SAMN40464890	24942466
						SAMEA2620503	176152345		SAMEA2621315	156635717		SAMN31286434	178867222		S30_RNA	SAMN09091577	22449147		NR0097	SAMN40464891	30119594
						SAMEA2620505	193237823		SAMEA2621337	148716014		SAMN31286435	59311451		S32_RNA	SAMN09092753	20695129		NR0100	SAMN40464892	23216832
						SAMEA2620506	145506236		SAMEA2621339	146459284		SAMN31286421	18182519		S3_RNA	SAMN09092734	35608746		NR0101	SAMN40464893	29786796
						SAMEA2620527	182949934		SAMEA2621362	189081049		SAMN31286422	55815007		S5-C27_RNA	SAMN09092747	39178664		NR0102	SAMN40464894	46630034
						SAMEA2620528	167019667		SAMEA2621378	88290520		SAMN31286423	97428471		S7_RNA	SAMN09091582	52180504		NR0104	SAMN40464895	27237127
						SAMEA2620530	149433864		SAMEA2621412	159869247		SAMN31286424	12153786		S9_RNA	SAMN09092748	52426924		NR0105	SAMN40464896	35585380
						SAMEA2620556	189207003		SAMEA2621423	121689099		SAMN31286425	127406578						NR0107	SAMN40464897	30924059
						SAMEA2620581	154552990		SAMEA2621440	131856457		SAMN31286426	86783951						NR0108	SAMN40464898	26190978
						SAMEA2620583	199884125		SAMEA2621470	188039709									NR0109	SAMN40464899	32551998
						SAMEA2620711	165195300		SAMEA2621475	149401151									NR0110	SAMN40464900	22424454
						SAMEA2620734	168855931		SAMEA2621498	146705638									NR0111	SAMN40464901	55851839
						SAMEA2620745	177411411		SAMEA2621523	176058051									NR0112	SAMN40464902	32385882
						SAMEA2620756	145714747		SAMEA2621544	170410204									NR0113	SAMN40464903	31607001
						SAMEA2620775	162020176		SAMEA2621772	194564347									NR0114	SAMN40464904	29950317
						SAMEA2620802	152583001		SAMEA2621791	176100321									NR0115	SAMN40464905	27512008
						SAMEA2620845	149206429		SAMEA2621793	165250151									NR0116	SAMN40464906	24643038
						SAMEA2620847	184710276		SAMEA2621795	144140278									NR0119	SAMN40464907	38440363
						SAMEA2620855	145100047		SAMEA2621823	209833837									NR0120	SAMN40464908	29441512
						SAMEA2620870	171203310		SAMEA2621832	148274488									NR0121	SAMN40464909	27906877
						SAMEA2620871	166163493		SAMEA2622012	167208247									NR0123	SAMN40464910	35583269
						SAMEA2620890	135439143		SAMEA2622035	155691160									NR0124	SAMN40464911	25898304
						SAMEA2620910	139602723		SAMEA2622039	136471687									NR0125	SAMN40464912	20711952
						SAMEA2620920	169684886		SAMEA2622106	201761396									NR0127	SAMN40464913	39239139
						SAMEA2620939	124921222		SAMEA2622130	191910410									NR0128	SAMN40464914	30859527
						SAMEA2620941	172785818		SAMEA2622132	163498659									NR0129	SAMN40464915	36389854
						SAMEA2620959	385619784		SAMEA2622184	188356058									NR0131	SAMN40464916	23383635
						SAMEA2620961	161184452		SAMEA2622230	190746405									NR0132	SAMN40464917	24665306
						SAMEA2620988	148415429		SAMEA2622232	154012088									NR0135	SAMN40464918	32291676
						SAMEA2621029	160606645		SAMEA2622325	184036045									NR0136	SAMN40464919	34772452
						SAMEA2621048	224703442		SAMEA2622345	186390352									NR0138	SAMN40464920	48980778
						SAMEA2621049	201849540		SAMEA2622463	141171633									NR0139	SAMN40464921	28739003
						SAMEA2621055	171268222		SAMEA2622489	136201466									NR0140	SAMN40464922	33130683
						SAMEA2621066	131377324		SAMEA2622490	133487802									NR0141	SAMN40464923	24762853
						SAMEA2621082	150778420		SAMEA2622661	148887100									NR0143	SAMN40464924	38017178
						SAMEA2621132	210038834		SAMEA2622914	127165041									NR0144	SAMN40464925	28503026
						SAMEA2621147	158173561		SAMEA2622936	150335157									NR0145	SAMN40464926	26735233
						SAMEA2621155	163810639		SAMEA2623018	139673260									NR0146	SAMN40464927	41614349
						SAMEA2621169	165839753		SAMEA2623037	183006644									NR0147	SAMN40464928	31427151
						SAMEA2621209	201641399		SAMEA2623072	180236545									NR0148	SAMN40464929	29168910
						SAMEA2621226	182923198		SAMEA2623092	141578055									NR0150	SAMN40464930	38489734
						SAMEA2621265	160198173		SAMEA2623206	192721074									NR0151	SAMN40464931	29397946
						SAMEA2621282	173378692		SAMEA2623228	157592415									NR0152	SAMN40464932	33291347
						SAMEA2621315	198703040		SAMEA2623284	186902930									NR0154	SAMN40464933	30507304
						SAMEA2621337	211885748		SAMEA2623295	129138736									NR0155	SAMN40464934	24223855
						SAMEA2621339	209627621		SAMEA2623350	130089183									NR0156	SAMN40464935	35782714
						SAMEA2621362	181491276		SAMEA2623379	213324726									NR0158	SAMN40464936	12186689
						SAMEA2621364	177303646		SAMEA2623419	188899697									NR0159	SAMN40464937	28232691
						SAMEA2621388	164642885		SAMEA2623479	189716601									NR0160	SAMN40464938	33828163
						SAMEA2621412	206915789		SAMEA2623504	142406822									NR0161	SAMN40464939	27553235
						SAMEA2621439	167685465		SAMEA2623506	152167132									NR0162	SAMN40464940	28971265
						SAMEA2621440	143014060		SAMEA2623532	135303449									NR0163	SAMN40464941	27375878
						SAMEA2621442	159376214		SAMEA2623552	121643656									NR0164	SAMN40464942	24954698
						SAMEA2621465	196784226		SAMEA2623641	162135995									NR0165	SAMN40464943	30199036
						SAMEA2621470	167855347		SAMEA2623685	170102771									NR0166	SAMN40464944	35631573
						SAMEA2621474	193798384		SAMEA2623723	167079075									NR0167	SAMN40464945	32008789
						SAMEA2621487	187525521		SAMEA2623734	136981609									NR0168	SAMN40464946	21992156
						SAMEA2621498	150679269		SAMEA2623774	130212744									NR0170	SAMN40464947	24326897
						SAMEA2621522	142887585		SAMEA2623817	127323653									NR0171	SAMN40464948	20868173
						SAMEA2621524	119669878		SAMEA2623839	174525325									NR0172	SAMN40464949	26097863
						SAMEA2621544	177622604		SAMEA2623861	172099506									NR0174	SAMN40464950	24879349
						SAMEA2621583	207782614		SAMEA2623872	136427031									NR0175	SAMN40464951	15779826
						SAMEA2621609	221403351		SAMEA2623901	174844236									NR0176	SAMN40464952	27838805
						SAMEA2621639	150226038		SAMEA2623958	202273190									NR0178	SAMN40464953	15677991
						SAMEA2621641	192479247		SAMEA2623961	153043782									NR0179	SAMN40464954	24445980
						SAMEA2621643	154829894		SAMEA2624980	178515464									NR0181	SAMN40464955	33212827
						SAMEA2621696	197019517		SAMEA2625587	170684026									NR0182	SAMN40464956	33976313
						SAMEA2621724	124537597		SAMEA2625588	185738743									NR0183	SAMN40464957	33961360
						SAMEA2621726	129463545		SAMEA2656955	135095608									NR0256	SAMN40464958	26316603
						SAMEA2621791	216350476		SAMEA2656956	176875973									NR0257	SAMN40464959	31644629
						SAMEA2621793	218418005		SAMEA2656958	168511994									NR0258	SAMN40464960	54575351
						SAMEA2621794	191598199		SAMEA2656959	182695370									NR0260	SAMN40464961	45109462
						SAMEA2621795	187647466		SAMEA2656960	136062602									NR0261	SAMN40464962	32536180
						SAMEA2621823	235156405		SAMEA2656961	178202812									NR0264	SAMN40464963	36937624
						SAMEA2621825	214752011		SAMEA2656962	191773851									NR0265	SAMN40464964	26340936
						SAMEA2621827	252149434		SAMEA2656964	160270371									NR0266	SAMN40464965	31616490
						SAMEA2621844	145270017		SAMEA2656965	148901286									NR0268	SAMN40464966	40692269
						SAMEA2621854	220451551		SAMEA2656966	140823961									NR0269	SAMN40464967	39518135
						SAMEA2621855	184443073		SAMEA2656967	188268432									NR0272	SAMN40464968	25498731
						SAMEA2621872	200809801		SAMEA2656968	140483059									NR0273	SAMN40464969	37559200
						SAMEA2621894	205722670		SAMEA2656969	194838456									NR0274	SAMN40464970	26740664
						SAMEA2621897	154829469		SAMEA2656971	184597198									NR0277	SAMN40464971	30780652
						SAMEA2622010	145152008		SAMEA2656972	171029265									NR0278	SAMN40464972	32297947
						SAMEA2622012	125257952		SAMEA2656973	203742688									NR0280	SAMN40464973	37036935
						SAMEA2622038	174694214		SAMEA2656977	163331837									NR0281	SAMN40464974	38520581
						SAMEA2622039	159203585		SAMEA2656979	192134040									NR0282	SAMN40464975	28949725
						SAMEA2622106	204745036		SAMEA2656980	183211410									NR0284	SAMN40464976	39282158
						SAMEA2622130	142349291		SAMEA2656983	181813711									NR0285	SAMN40464977	36765650
						SAMEA2622132	163075729		SAMEA2656984	188888716									NR0288	SAMN40464978	31925572
						SAMEA2622184	166013210		SAMEA2656988	190783773									NR0289	SAMN40464979	37626022
						SAMEA2622230	185810699		SAMEA2656991	158732901									NR0292	SAMN40464980	24544968
						SAMEA2622232	174887473		SAMEA2656992	190764466									NR0293	SAMN40464981	30378881
						SAMEA2622325	147461492		SAMEA2656994	176872302									NR0297	SAMN40464982	25437823
						SAMEA2622345	131407477		SAMEA2656995	150933666									NR0298	SAMN40464983	26473581
						SAMEA2622347	127781830		SAMEA2656997	160080300									NR0300	SAMN40464984	9372332
						SAMEA2622463	170402100		SAMEA2656998	173092291									NR0301	SAMN40464985	16740685
						SAMEA2622465	174614037		SAMEA2656999	199954989									NR0304	SAMN40464986	31911022
						SAMEA2622489	205631961		SAMEA2657000	190376210									NR0305	SAMN40464987	24849166
						SAMEA2622490	159336560		SAMEA2657003	150944493									NR0308	SAMN40464988	32174770
						SAMEA2622536	193025139		SAMEA2657007	187045164									NR0309	SAMN40464989	37353244
						SAMEA2622538	189657711		SAMEA2657008	182120117									NR0310	SAMN40464990	29891236
						SAMEA2622561	195015074		SAMEA2657009	173435430									NR0311	SAMN40464991	29709174
						SAMEA2622605	201784181		SAMEA2657010	127156207									NR0314	SAMN40464992	34684779
						SAMEA2622661	164765911		SAMEA2657013	128213121									NR0315	SAMN40464993	30140906
						SAMEA2622699	176263044		SAMEA2657014	168523749									NR0318	SAMN40464994	22128229
						SAMEA2622875	167298557		SAMEA2657015	145766308									NR0319	SAMN40464995	22661800
						SAMEA2622894	167107609		SAMEA2657016	188749996									NR0324	SAMN40464996	35357844
						SAMEA2622914	187133136		SAMEA2657019	189703639									NR0325	SAMN40464997	63665987
						SAMEA2622936	179741503		SAMEA2657020	157867426									NR0326	SAMN40464998	33644663
						SAMEA2622957	193358567		SAMEA2657023	193491409									NR0327	SAMN40464999	29833902
						SAMEA2622959	222526044		SAMEA2657029	151708300									NR0329	SAMN40465000	33864880
						SAMEA2622983	213332360		SAMEA2657030	144895397									NR0330	SAMN40465001	30478378
						SAMEA2623018	177438558		SAMEA2657031	183240911									NR0331	SAMN40465002	30957959
						SAMEA2623037	182602580		SAMEA2657033	160623656									NR0332	SAMN40465003	34731210
						SAMEA2623072	203861878		SAMEA2657034	186852094									NR0333	SAMN40465004	22184668
						SAMEA2623092	177177746		SAMEA2657035	138271384									NR0334	SAMN40465005	28009236
						SAMEA2623128	239828483		SAMEA2657036	158873904									NR0344	SAMN40465006	41140486
						SAMEA2623148	171636109		SAMEA2657037	196393644									NR0345	SAMN40465007	37575616
						SAMEA2623206	167044110		SAMEA2657038	163280561									NR0346	SAMN40465008	29711929
						SAMEA2623228	177384065		SAMEA2657042	137963566									NR0352	SAMN40465009	31864478
						SAMEA2623284	167889669		SAMEA2657044	196798403									NR0353	SAMN40465010	26400530
						SAMEA2623304	210660473		SAMEA2657045	145156147									NR0355	SAMN40465011	23102503
						SAMEA2623359	179065844		SAMEA2657046	172050443									NR0356	SAMN40465012	25278101
						SAMEA2623379	226625745		SAMEA2657047	194256391									NR0357	SAMN40465013	23597313
						SAMEA2623419	211829291		SAMEA2657048	194567206									NR0359	SAMN40465014	18882437
						SAMEA2623439	199597133		SAMEA2657049	202066392									NR0360	SAMN40465015	8216679
						SAMEA2623479	163847821		SAMEA2657050	151903160									NR0365	SAMN40465016	35615568
						SAMEA2623504	164724099		SAMEA2657053	159228390									NR0366	SAMN40465017	32138371
						SAMEA2623506	150389878		SAMEA2657060	181172603									NR0367	SAMN40465018	20705717
						SAMEA2623543	207655656		SAMEA2657061	191524695									NR0376	SAMN40465019	36809276
						SAMEA2623564	195165961		SAMEA2657062	193307329									NR0377	SAMN40465020	33439475
						SAMEA2623641	199146900		SAMEA2657063	173049643									NR0380	SAMN40465021	36248551
						SAMEA2623685	184299211		SAMEA2657065	185548957									NR0381	SAMN40465022	24578548
						SAMEA2623743	174076692		SAMEA2657067	133230537									NR0387	SAMN40465023	31199067
						SAMEA2623783	260240579		SAMEA2657068	143187756									NR0388	SAMN40465024	20030683
						SAMEA2623817	206513982		SAMEA2657070	160481709									NR0389	SAMN40465025	18506366
						SAMEA2623839	213416557		SAMEA2657072	168391813									NR0390	SAMN40465026	47784984
						SAMEA2623861	170724674		SAMEA2657073	187782158									NR0395	SAMN40465027	36673591
						SAMEA2623879	215518694		SAMEA2657076	167575350									NR0396	SAMN40465028	42723791
						SAMEA2623901	168201472		SAMEA2657077	124103118									NR0397	SAMN40465029	34552343
						SAMEA2623958	198180956		SAMEA2657078	131416426									NR0401	SAMN40465030	45964216
						SAMEA2623961	202893356		SAMEA2657079	151863511									NR0402	SAMN40465031	43978531
						SAMEA2656955	155977419		SAMEA2657080	205052359									NR0403	SAMN40465032	37485802
						SAMEA2656956	136952513		SAMEA2657082	179889371									NR0404	SAMN40465033	40531539
						SAMEA2656957	141865559		SAMEA2657083	173083630									NR0405	SAMN40465034	48382333
						SAMEA2656958	177739058		SAMEA2657086	150263051									NR0406	SAMN40465035	27058153
						SAMEA2656959	202825730		SAMEA2657087	138190693									NR0407	SAMN40465036	50824430
						SAMEA2656960	165363385		SAMEA2657088	187500082									NR0411	SAMN40465037	44397712
						SAMEA2656961	158778293		SAMEA2657090	180526666									NR0412	SAMN40465038	46618750
						SAMEA2656962	170847697		SAMEA2657091	173055410									NR0413	SAMN40465039	28067469
						SAMEA2656963	172292076		SAMEA2657092	175236640									NR0415	SAMN40465040	46115489
						SAMEA2656964	139940874		SAMEA2657094	152899474									NR0416	SAMN40465041	40762134
						SAMEA2656965	353797572		SAMEA2657096	138301672									NR0419	SAMN40465042	35931972
						SAMEA2656966	181318906		SAMEA2657097	169213137									NR0420	SAMN40465043	37836370
						SAMEA2656967	158658999		SAMEA2657098	152581037									NR0421	SAMN40465044	29231787
						SAMEA2656968	161559760		SAMEA2657100	175524344									NR0423	SAMN40465045	48373100
						SAMEA2656969	165124592		SAMEA2657101	135376384									NR0424	SAMN40465046	32315756
						SAMEA2656970	189504833		SAMEA2657102	148807047									NR0428	SAMN40465047	44990613
						SAMEA2656971	177591158		SAMEA2657103	200291337									NR0429	SAMN40465048	38905413
						SAMEA2656972	162051394		SAMEA2657104	143642620									NR0432	SAMN40465049	33556812
						SAMEA2656973	168956280		SAMEA2657106	184446486									NR0433	SAMN40465050	38861620
						SAMEA2656974	168355961		SAMEA2657107	163033616									NR0434	SAMN40465051	29195249
						SAMEA2656977	143602482		SAMEA2657108	139748014									NR0441	SAMN40465052	21373226
						SAMEA2656979	144511079		SAMEA2657110	167562486									NR0442	SAMN40465053	20053539
						SAMEA2656980	203569971		SAMEA2661639	188513919									NR0443	SAMN40465054	25125589
						SAMEA2656983	170491399		SAMEA2730594	187899348									NR0445	SAMN40465055	36601788
						SAMEA2656984	185749512		SAMEA2730652	162693040									NR0446	SAMN40465056	41643354
						SAMEA2656985	161077049		SAMEA2730657	192538494									NR0451	SAMN40465057	39913532
						SAMEA2656987	194187057		SAMEA2730769	154941932									NR0452	SAMN40465058	25692318
						SAMEA2656988	171639640		SAMEA2730799	142307948									NR0455	SAMN40465059	30794275
						SAMEA2656989	188359817		SAMEA2730804	185056047									NR0456	SAMN40465060	33615304
						SAMEA2656991	165706572		SAMEA2730834	214742764									NR0459	SAMN40465061	27036068
						SAMEA2656992	181337924		SAMEA2730839	134582849									NR0460	SAMN40465062	20993041
						SAMEA2656993	101354661		SAMEA2730869	195983620									NR0461	SAMN40465063	22727596
						SAMEA2656994	160658646		SAMEA2730873	187820260									NR0468	SAMN40465064	17906812
						SAMEA2656995	170532742		SAMEA2730877	149204030									NR0469	SAMN40465065	24731177
						SAMEA2656997	145430562		SAMEA2730898	149813512									NR0470	SAMN40465066	23765215
						SAMEA2656998	196185855		SAMEA2730900	145011776									NR0473	SAMN40465067	28690869
						SAMEA2656999	158887852		SAMEA2730918	194728146									NR0474	SAMN40465068	36297553
						SAMEA2657000	151045346		SAMEA2730939	194728455									NR0475	SAMN40465069	25863213
						SAMEA2657001	113273579		SAMEA2730950	164714419									NR0477	SAMN40465070	34788535
						SAMEA2657003	150487589		SAMEA2730956	187693756									NR0478	SAMN40465071	36063930
						SAMEA2657004	175261611		SAMEA2730960	220943917									NR0481	SAMN40465072	31884214
						SAMEA2657007	148423719		SAMEA2730995	161952705									NR0482	SAMN40465073	30183288
						SAMEA2657008	128172285		SAMEA2731026	176564803									NR0485	SAMN40465074	34448881
						SAMEA2657009	176005636		SAMEA2731031	218409137									NR0486	SAMN40465075	26896291
						SAMEA2657010	141314528		SAMEA2731035	163531542									NR0500	SAMN40465076	39808925
						SAMEA2657013	154870650		SAMEA2731167	185371126									NR0501	SAMN40465077	27453028
						SAMEA2657014	149854345		SAMEA2731338	160717694									NR0502	SAMN40465078	23846566
						SAMEA2657015	193608936		SAMEA2731634	191275468									NR0503	SAMN40465079	21786964
						SAMEA2657016	173436691		SAMEA2731641	161621615									NR0504	SAMN40465080	43240070
						SAMEA2657017	141258551		SAMEA2731672	200721180									NR0505	SAMN40465081	47036395
						SAMEA2657019	151897408		SAMEA2731674	186036416									NR0506	SAMN40465082	23561232
						SAMEA2657020	161898206		SAMEA2731714	158231895									NR0507	SAMN40465083	21535181
						SAMEA2657023	166132832		SAMEA2731784	129677958									NR0508	SAMN40465084	38406219
						SAMEA2657026	146783743		SAMEA2731788	174086808									NR0509	SAMN40465085	32652299
						SAMEA2657029	149564209		SAMEA2731821	130634719									NR0510	SAMN40465086	22151795
						SAMEA2657030	224935742		SAMEA2731846	171969979									NR0513	SAMN40465087	41684276
						SAMEA2657031	157962460		SAMEA2731851	143166018									NR0514	SAMN40465088	35696226
						SAMEA2657033	143308025		SAMEA2731859	198647286									NR0515	SAMN40465089	30736983
						SAMEA2657034	152552501		SAMEA2731893	198530657									NR0516	SAMN40465090	39470237
						SAMEA2657035	155037795		SAMEA2731900	142976317									NR0517	SAMN40465091	23553288
						SAMEA2657036	169057963		SAMEA2731945	167625454									NR0518	SAMN40465092	18636965
						SAMEA2657037	161886213		SAMEA2731987	116730838									NR0524	SAMN40465093	31459459
						SAMEA2657038	166714429		SAMEA2731992	134200514									NR0525	SAMN40465094	29118237
						SAMEA2657039	159611273		SAMEA2731996	181754301									NR0526	SAMN40465095	23807995
						SAMEA2657040	163296018		SAMEA2731999	140830859									NR0527	SAMN40465096	17592365
						SAMEA2657042	173034306		SAMEA2732005	141333078									NR0528	SAMN40465097	34542155
						SAMEA2657044	130879075		SAMEA2732035	137018058									NR0529	SAMN40465098	33609732
						SAMEA2657045	146817159		SAMEA2732042	158342612									NR0530	SAMN40465099	37670589
						SAMEA2657046	112977235		SAMEA2732044	192242667									NR0531	SAMN40465100	20409562
						SAMEA2657047	190993327		SAMEA2732052	146410095									NR0532	SAMN40465101	22432139
						SAMEA2657048	156303633		SAMEA2732056	203777028									NR0533	SAMN40465102	15671077
						SAMEA2657049	171108091		SAMEA2732058	161088495									NR0534	SAMN40465103	23041015
						SAMEA2657050	161030459		SAMEA2732073	206928620									NR0535	SAMN40465104	27911255
						SAMEA2657052	182315399		SAMEA2732077	163642584									NR0536	SAMN40465105	23582815
						SAMEA2657053	186645843		SAMEA2732085	161134689									NR0537	SAMN40465106	31606300
						SAMEA2657054	148816420		SAMEA2732088	179924821									NR0538	SAMN40465107	23568054
						SAMEA2657056	183583342		SAMEA2732095	173697543									NR0539	SAMN40465108	33898857
						SAMEA2657060	129677590		SAMEA2732099	190285819									NR0540	SAMN40465109	26273168
						SAMEA2657061	183453522		SAMEA2732135	153189814									NR0541	SAMN40465110	27999026
						SAMEA2657062	158264224		SAMEA2732139	199915364									NR0542	SAMN40465111	22923244
						SAMEA2657063	144519425		SAMEA2732192	180884905									NR0543	SAMN40465112	29906725
						SAMEA2657064	140527309		SAMEA2732214	194408428									NR0544	SAMN40465113	21972792
						SAMEA2657065	154802918		SAMEA2732231	208273522									NR0545	SAMN40465114	35791050
						SAMEA2657067	137618710		SAMEA2732245	177552779									NR0546	SAMN40465115	26896079
						SAMEA2657068	174157540		SAMEA2732299	198084281									NR0547	SAMN40465116	25104727
						SAMEA2657070	152687763		SAMEA2732321	177618576									NR0548	SAMN40465117	39233900
						SAMEA2657072	163346996		SAMEA2732344	197270679									NR0549	SAMN40465118	37211349
						SAMEA2657073	180158284		SAMEA2732378	220632335									NR0550	SAMN40465119	20882334
						SAMEA2657075	171897932		SAMEA2732399	172894476									NR0551	SAMN40465120	24579148
						SAMEA2657076	148437839		SAMEA2732401	183218440									NR0552	SAMN40465121	24651489
						SAMEA2657077	178828070		SAMEA2732412	162788895									NR0553	SAMN40465122	26635251
						SAMEA2657078	149960260		SAMEA2732415	198421836									NR0554	SAMN40465123	22027651
						SAMEA2657079	145646323		SAMEA2732453	134816048									NR0555	SAMN40465124	32768103
						SAMEA2657080	169987930		SAMEA2732468	214120419									NR0556	SAMN40465125	34204522
						SAMEA2657082	170135604		SAMEA2732508	138841783									NR0557	SAMN40465126	27806746
						SAMEA2657083	154048935		SAMEA2732530	212280303									NR0558	SAMN40465127	30297053
						SAMEA2657084	187323816		SAMEA2732536	164048529
						SAMEA2657086	150462311		SAMEA2732583	177037573
						SAMEA2657087	186455331		SAMEA2732604	169837356
						SAMEA2657088	115114969		SAMEA2732607	181814859
						SAMEA2657089	154545597		SAMEA2732613	201877938
						SAMEA2657090	181899094		SAMEA2732628	183533491
						SAMEA2657091	193792503		SAMEA2732654	207227842
						SAMEA2657092	160505815		SAMEA2732658	213413768
						SAMEA2657093	162823683		SAMEA2732696	209859380
						SAMEA2657094	136145249		SAMEA2732716	181850172
						SAMEA2657095	175440986		SAMEA2732729	136020887
						SAMEA2657096	161229606		SAMEA2732732	145116481
						SAMEA2657097	177875773		SAMEA2732736	156681717
						SAMEA2657098	123333334		SAMEA2732785	166968147
						SAMEA2657099	162553265		SAMEA2732790	199862077
						SAMEA2657100	190257649		SAMEA2732797	178865357
						SAMEA2657101	185478026		SAMEA2732843	145257821
						SAMEA2657102	147171426		SAMEA2732863	145113872
						SAMEA2657103	154881058		SAMEA2732866	191772902
						SAMEA2657104	154546639		SAMEA2732891	169303154
						SAMEA2657106	197894844		SAMEA2732906	208845118
						SAMEA2657107	168205982		SAMEA2732914	148358217
						SAMEA2657108	138683779		SAMEA2732932	157908697
						SAMEA2657110	134314821		SAMEA2732954	149710422
						SAMEA2661639	203339468		SAMEA2732980	148296977
						SAMEA2730447	199428698		SAMEA2732983	184587549
						SAMEA2730450	177284567		SAMEA2732986	199591023
						SAMEA2730594	176056374		SAMEA2732990	193906066
						SAMEA2730625	167699618		SAMEA2732994	178496219
						SAMEA2730647	108721247		SAMEA4396435	141557929
						SAMEA2730652	176263128		SAMEA4396508	121607670
						SAMEA2730657	185692569		SAMEA4396935	83747903
						SAMEA2730769	141167395		SAMEA4396982	103661661
						SAMEA2730773	158795907		SAMEA4397045	100564632
						SAMEA2730804	138440102		SAMEA4397112	123890631
						SAMEA2730834	174307506		SAMEA4397168	118187719
						SAMEA2730839	205104910		SAMEA4397249	115777740
						SAMEA2730858	197245044		SAMEA4397289	127395539
						SAMEA2730869	165868649		SAMEA4397324	142953900
						SAMEA2730873	182182449		SAMEA4397483	89772046
						SAMEA2730877	165894837		SAMEA4397530	104465239
						SAMEA2730888	166037265		SAMEA4397580	143350816
						SAMEA2730908	177406275		SAMEA4397621	160815422
						SAMEA2730909	138265479		SAMEA4397660	149568704
						SAMEA2730918	180046742		SAMEA4397716	143693854
						SAMEA2730939	155981594		SAMEA4397768	88362886
						SAMEA2730950	210012421		SAMEA4397809	49190617
						SAMEA2730956	159278207		SAMEA4397853	93595039
						SAMEA2730960	250982727		SAMEA4397915	69958043
						SAMEA2730995	147728766		SAMEA4397942	122056129
						SAMEA2731026	145982778		SAMEA4398022	67421322
						SAMEA2731031	184881717		SAMEA4398077	67700288
						SAMEA2731035	165850984		SAMEA4398105	97786996
						SAMEA2731167	181366957		SAMEA4398187	135365864
						SAMEA2731348	199483866		SAMEA4398261	143356395
						SAMEA2731356	231445050		SAMEA4398309	116252383
						SAMEA2731359	183329514		SAMEA4398381	81901417
						SAMEA2731380	222723500		SAMEA6864574	179585384
						SAMEA2731419	153501020		SAMEA6864575	168629428
						SAMEA2731420	156845240		SAMEA6864577	189447541
						SAMEA2731434	149465819		SAMEA6864578	184221525
						SAMEA2731477	195814338		SAMEA6864579	178106374
						SAMEA2731517	162379525		SAMEA6864580	179419896
						SAMEA2731573	173680976		SAMEA9437671	126202279
						SAMEA2731613	205805450		SAMEA9437676	175517497
						SAMEA2731634	200549962		SAMEA9437678	166109699
						SAMEA2731641	212022899		SAMEA9437680	155660153
						SAMEA2731672	195404249		SAMEA9437681	39569204
						SAMEA2731676	199568169		SAMEA9449158	181445236
						SAMEA2731784	196750126		SAMEA9449159	211054264
						SAMEA2731788	215592218		SAMEA9449160	181099799
						SAMEA2731821	179882811		SAMEA9449161	182841529
						SAMEA2731846	229747479		SAMEA9449163	186291026
						SAMEA2731851	163347882		SAMEA9449169	190333407
						SAMEA2731859	180715497		SAMEA9449170	161511189
						SAMEA2731883	171077838		SAMEA9449171	163445420
						SAMEA2731893	216861123		SAMEA9449172	190015473
						SAMEA2731900	195954088		SAMEA9449174	219004167
						SAMEA2731923	213289601		SAMEA9449175	174096275
						SAMEA2731938	148490426		SAMEA9449179	186454470
						SAMEA2731945	162418857		SAMEA9449181	185581366
						SAMEA2731973	178680229		SAMEA9449182	192365557
						SAMEA2731974	168507451		SAMEA9449184	182577735
						SAMEA2731979	161441229		SAMEA9449185	168800968
						SAMEA2731982	152414413		SAMEA9449187	190725069
						SAMEA2731987	230046882		SAMEA9449190	175735989
						SAMEA2731992	196952212		SAMEA9449191	178786071
						SAMEA2731999	197423885		SAMEA9449192	189203425
						SAMEA2732005	234859885		SAMEA9449195	172148641
						SAMEA2732026	190185931		SAMEA9449196	175095864
						SAMEA2732035	183907041		SAMEA9449200	207942039
						SAMEA2732042	205122289		SAMEA9449202	193110790
						SAMEA2732052	193720886		SAMEA9449205	182040512
						SAMEA2732056	156027732		SAMEA9449212	214539929
						SAMEA2732058	155157070		SAMEA9449213	175811738
						SAMEA2732073	206166540		SAMEA9449214	210545800
						SAMEA2732085	173362994		SAMEA9449215	209678995
						SAMEA2732088	147102687		SAMEA9449216	212703300
						SAMEA2732095	187209156		SAMEA9449219	194051799
						SAMEA2732099	205292121		SAMEA9449220	200753308
						SAMEA2732120	198512816		SAMEA9449221	205385021
						SAMEA2732135	221813911		SAMEA9449222	169080869
						SAMEA2732139	162602270		SAMEA9449223	215224089
						SAMEA2732192	215691398		SAMEA9449224	192466898
						SAMEA2732208	159062893		SAMEA9449226	180340625
						SAMEA2732214	186501660		SAMEA9449227	183112232
						SAMEA2732231	235143878		SAMEA9449228	170774021
						SAMEA2732245	157581042		SAMEA9449229	171822243
						SAMEA2732267	197112100		SAMEA9449230	168281072
						SAMEA2732277	197016229		SAMEA9449231	206934224
						SAMEA2732299	193144857		SAMEA9449233	160392209
						SAMEA2732304	211001654		SAMEA9449234	172000317
						SAMEA2732322	189370403		SAMEA9449235	203852240
						SAMEA2732344	210636174		SAMEA9449237	179772809
						SAMEA2732360	181661425		SAMEA9449239	172498161
						SAMEA2732362	183009699		SAMEA9449240	200799624
						SAMEA2732363	182801991		SAMEA9449241	209905556
						SAMEA2732378	159364695		SAMEA9449242	193544482
						SAMEA2732399	225136430		SAMEA9449243	195679464
						SAMEA2732401	210016077		SAMEA9449246	178656764
						SAMEA2732412	187544302		SAMEA9449248	191461499
						SAMEA2732415	146701264		SAMEA9449250	240323080
						SAMEA2732419	179677717		SAMEA9449251	232231299
						SAMEA2732425	215328685		SAMEA9449252	241002681
						SAMEA2732441	186292679		SAMEA9449253	157535964
						SAMEA2732453	164921595		SAMEA9449254	228157334
						SAMEA2732468	200116168		SAMEA9449255	181130614
						SAMEA2732484	185473254		SAMEA9449259	160657425
						SAMEA2732508	181131686		SAMEA9449260	194754443
						SAMEA2732530	221482479		SAMEA9449261	159920402
						SAMEA2732536	144647179		SAMEA9449265	224013925
						SAMEA2732543	192295853		SAMEA9449266	161809175
						SAMEA2732581	213590390		SAMEA9449267	238271790
						SAMEA2732604	184408703		SAMEA9449268	177976446
						SAMEA2732607	166125029		SAMEA9449272	158748375
						SAMEA2732613	211562032		SAMEA9449273	165597017
						SAMEA2732644	149912098		SAMEA9449277	147291495
						SAMEA2732648	194266420		SAMEA9449278	138441193
						SAMEA2732654	158322959
						SAMEA2732658	173521199
						SAMEA2732691	138372544
						SAMEA2732716	206947153
						SAMEA2732721	246705552
						SAMEA2732729	247301066
						SAMEA2732732	205446523
						SAMEA2732736	168430839
						SAMEA2732768	144383923
						SAMEA2732772	185740057
						SAMEA2732773	132502341
						SAMEA2732785	232935824
						SAMEA2732790	187331895
						SAMEA2732797	191808126
						SAMEA2732834	162777902
						SAMEA2732838	190985332
						SAMEA2732843	181026146
						SAMEA2732853	194673471
						SAMEA2732857	167658517
						SAMEA2732861	158856549
						SAMEA2732863	227089741
						SAMEA2732866	206515912
						SAMEA2732891	147004410
						SAMEA2732895	175071651
						SAMEA2732902	183586910
						SAMEA2732906	193685310
						SAMEA2732910	172406172
						SAMEA2732914	178827568
						SAMEA2732917	192103440
						SAMEA2732923	117810535
						SAMEA2732932	171066352
						SAMEA2732968	144436265
						SAMEA2732974	178376645
						SAMEA2732980	190221035
						SAMEA2732983	174798184
						SAMEA2732986	168751805
						SAMEA2732990	160865872
						SAMEA2732994	179765093
						SAMEA4396424	198840961
						SAMEA4396431	199936822
						SAMEA4396452	173800833
						SAMEA4396496	178696751
						SAMEA4396505	196366537
						SAMEA4396525	182498235
						SAMEA4396532	156049319
						SAMEA4396538	201466306
						SAMEA4396934	178597987
						SAMEA4396949	187275985
						SAMEA4396966	152617167
						SAMEA4396971	152217640
						SAMEA4396981	207480280
						SAMEA4396996	237397192
						SAMEA4397034	162494527
						SAMEA4397044	172430758
						SAMEA4397059	191098990
						SAMEA4397101	140658259
						SAMEA4397110	181924761
						SAMEA4397129	165446868
						SAMEA4397145	216812013
						SAMEA4397151	128749104
						SAMEA4397157	169732580
						SAMEA4397163	155161399
						SAMEA4397184	192812113
						SAMEA4397239	171060937
						SAMEA4397244	160733287
						SAMEA4397265	235890114
						SAMEA4397274	168807967
						SAMEA4397278	159022415
						SAMEA4397284	227561206
						SAMEA4397305	193454013
						SAMEA4397311	175787252
						SAMEA4397320	141604048
						SAMEA4397340	207202709
						SAMEA4397348	223538305
						SAMEA4397472	152128336
						SAMEA4397479	161179344
						SAMEA4397500	186294539
						SAMEA4397507	214718796
						SAMEA4397516	193060122
						SAMEA4397524	175725538
						SAMEA4397544	153231514
						SAMEA4397553	147998764
						SAMEA4397569	202195861
						SAMEA4397575	213748946
						SAMEA4397596	172077046
						SAMEA4397604	226915582
						SAMEA4397611	169085968
						SAMEA4397617	188447335
						SAMEA4397637	233719725
						SAMEA4397645	163181118
						SAMEA4397649	162173258
						SAMEA4397656	164321900
						SAMEA4397676	180707033
						SAMEA4397682	171494540
						SAMEA4397691	190541023
						SAMEA4397699	177666344
						SAMEA4397705	141402525
						SAMEA4397712	239437334
						SAMEA4397756	171007248
						SAMEA4397763	166841251
						SAMEA4397780	184362852
						SAMEA4397788	198570229
						SAMEA4397798	162365415
						SAMEA4397804	176939678
						SAMEA4397825	249017914
						SAMEA4397835	174177119
						SAMEA4397842	209509694
						SAMEA4397849	195055985
						SAMEA4397869	207764107
						SAMEA4397878	192799308
						SAMEA4397887	168615321
						SAMEA4397897	157185725
						SAMEA4397903	201785066
						SAMEA4397910	185689974
						SAMEA4397930	179990981
						SAMEA4397938	167375680
						SAMEA4397958	153914880
						SAMEA4397965	157567010
						SAMEA4398009	241042347
						SAMEA4398016	166999275
						SAMEA4398039	162076095
						SAMEA4398043	172666697
						SAMEA4398055	155344871
						SAMEA4398057	196945126
						SAMEA4398067	205041521
						SAMEA4398074	140958740
						SAMEA4398094	194170500
						SAMEA4398100	175575803
						SAMEA4398122	179443043
						SAMEA4398144	190831996
						SAMEA4398176	175961866
						SAMEA4398183	138799498
						SAMEA4398204	150825097
						SAMEA4398247	173849906
						SAMEA4398255	149117071
						SAMEA4398278	216608056
						SAMEA4398296	147769520
						SAMEA4398304	199843525
						SAMEA4398326	187803403
						SAMEA4398370	160480056
						SAMEA4398376	179898376
						SAMEA4398397	172486725
						SAMEA6864582	223300333
						SAMEA6864583	223058371
						SAMEA6864584	181915803
						SAMEA6864585	182303005
						SAMEA6864586	138512807
						SAMEA6864587	182925026

## Sheet: sample list biotope
Biosample IDs of raw read files used for metatranscriptomic assembly of the oceanic biotopes
N_S4_40_3_R1	CICL1
N_S4_40_51_R1	CICL2
N_S11_10_3_R1	CICL3
N_S11_10_51_R1	CICL4
N_S11_50_3_R1	CICL5
N_S15_10_3_R1	CICL6
N_S15_10_51_R1	CICL7
N_S15_50_3_R1	CICL8
N_S15_100_3_R1	CICL9
N_S15_100_51_R1	CICL10
N_S22_20_3_R1	CICL11
N_S22_20_51_R1	CICL12
N_S22_100_3_R1	CICL13
N_S22_100_51_R1	CICL14
N_S22_150_3_R1	CICL15
N_S22_150_51_R1	CICL16
N_S22_60_3_R1	CICL17
N_S27_210_3_R1	CICL18
N_S27_210_51_R1	CICL19
N_S27_100_3_R1	CICL20
N_S27_100_51_R1	CICL21
N_S27_60_3_R1	CICL22
N_S27_20_3_R1	CICL23
N_S27_20_51_R1	CICL24
N_S32_24_3_R1	CICL25
N_S32_24_51_R1	CICL26
N_S32_100_3_R1	CICL27
N_S32_100_51_R1	CICL28
N_S32_60_3_R1	CICL29
N_S32_60_51_R1	CICL30
ARK-118M_RNA	ARCT1	ATL_001	DCM
ARK-120M_RNA	ARCT2	ATL_002	DCM
ARK-122M_RNA	ARCT3	ATL_003	DCM
ARK-130M_RNA	ARCT4	ATL_006	DCM
ARK-132M_RNA	ARCT5	ATL_004	DCM
ARK-132S_RNA	ARCT6	ATL_005	SRF
ARK-135M_RNA	ARCT7	ATL_007	DCM
ARK-149M_RNA	ARCT8	ATL_014	DCM
ARK-15M_RNA	ARCT9	ATL_019	DCM
ARK-20M_RNA	ARCT10	ATL_018	SRF
ARK-27M_RNA	ARCT11	ATL_017	DCM
ARK-37M_RNA	ARCT12	ATL_016	SRF
ARK-3M_RNA	ARCT13	ATL_023	SRF
ARK-51M_RNA	ARCT14	ATL_015	DCM
ARK-55S_RNA	ARCT15	ATL_013	SRF
ARK-5M_RNA	ARCT16	ATL_022	SRF
ARK-61M_RNA	ARCT17	ATL_011	SRF
ARK-63M_RNA	ARCT18	ATL_010	DCM
ARK-7M_RNA	ARCT19	ATL_021	DCM
ARK-87M_RNA	ARCT20	ATL_008	DCM
ARK-8M_RNA	ARCT21	ATL_020	DCM
SAMEA4396935	ARCT22	TARA_158	SRF
SAMEA4396982	ARCT23	TARA_158	DCM
SAMEA4397045	ARCT24	TARA_163	SRF
SAMEA4397112	ARCT25	TARA_168	SRF
SAMEA4397168	ARCT26	TARA_168	DCM
SAMEA4397249	ARCT27	TARA_173	SRF
SAMEA4397289	ARCT28	TARA_173	DCM
SAMEA4397324	ARCT29	TARA_175	SRF
SAMEA4397483	ARCT30	TARA_180	SRF
SAMEA4397530	ARCT31	TARA_180	DCM
SAMEA4397580	ARCT32	TARA_188	SRF
SAMEA4397621	ARCT33	TARA_188	DCM
SAMEA4397660	ARCT34	TARA_189	SRF
SAMEA4397716	ARCT35	TARA_189	DCM
SAMEA6864575	ARCT36	TARA_158	SRF
SAMEA9437671	ARCT37	TARA_158	SRF
SAMEA9437676	ARCT38	TARA_180	DCM
SAMEA9437678	ARCT39	TARA_189	DCM
SAMEA9437680	ARCT40	TARA_189	SRF
SAMEA9449169	ARCT41	TARA_158	DCM
SAMEA9449170	ARCT42	TARA_158	SRF
SAMEA9449171	ARCT43	TARA_158	DCM
SAMEA9449172	ARCT44	TARA_158	DCM
SAMEA9449174	ARCT45	TARA_163	SRF
SAMEA9449175	ARCT46	TARA_163	SRF
SAMEA9449179	ARCT47	TARA_168	DCM
SAMEA9449181	ARCT48	TARA_168	SRF
SAMEA9449182	ARCT49	TARA_168	DCM
SAMEA9449184	ARCT50	TARA_168	SRF
SAMEA9449185	ARCT51	TARA_168	DCM
SAMEA9449187	ARCT52	TARA_168	SRF
SAMEA9449190	ARCT53	TARA_173	DCM
SAMEA9449191	ARCT54	TARA_173	SRF
SAMEA9449192	ARCT55	TARA_173	SRF
SAMEA9449195	ARCT56	TARA_173	DCM
SAMEA9449196	ARCT57	TARA_173	SRF
SAMEA9449200	ARCT58	TARA_175	SRF
SAMEA9449202	ARCT59	TARA_175	SRF
SAMEA9449205	ARCT60	TARA_175	SRF
SAMEA9449212	ARCT61	TARA_180	SRF
SAMEA9449213	ARCT62	TARA_180	DCM
SAMEA9449214	ARCT63	TARA_180	SRF
SAMEA9449215	ARCT64	TARA_180	DCM
SAMEA9449216	ARCT65	TARA_180	SRF
SAMEA9449219	ARCT66	TARA_188	DCM
SAMEA9449220	ARCT67	TARA_188	SRF
SAMEA9449221	ARCT68	TARA_188	DCM
SAMEA9449222	ARCT69	TARA_188	SRF
SAMEA9449223	ARCT70	TARA_188	DCM
SAMEA9449224	ARCT71	TARA_188	SRF
SAMEA9449226	ARCT72	TARA_189	DCM
SAMEA9449227	ARCT73	TARA_189	SRF
SAMEA9449228	ARCT74	TARA_189	DCM
SAMEA9449229	ARCT75	TARA_189	SRF
NR0001_R1	NCOG1
NR0002_R1	NCOG2
NR0003_R1	NCOG3
NR0006_R1	NCOG4
NR0008_R1	NCOG5
NR0010_R1	NCOG6
NR0012_R1	NCOG7
NR0014_R1	NCOG8
NR0016_R1	NCOG9
NR0024_R1	NCOG10
NR0028_R1	NCOG11
NR0032_R1	NCOG12
NR0036_R1	NCOG13
NR0040_R1	NCOG14
NR0043_R1	NCOG15
NR0047_R1	NCOG16
NR0049_R1	NCOG17
NR0053_R1	NCOG18
NR0056_R1	NCOG19
NR0057_R1	NCOG20
NR0061_R1	NCOG21
NR0065_R1	NCOG22
NR0069_R1	NCOG23
NR0073_R1	NCOG24
NR0077_R1	NCOG25
NR0081_R1	NCOG26
NR0085_R1	NCOG27
NR0088_R1	NCOG28
NR0092_R1	NCOG29
NR0096_R1	NCOG30
NR0100_R1	NCOG31
NR0105_R1	NCOG32
NR0109_R1	NCOG33
NR0116_R1	NCOG34
NR0120_R1	NCOG35
NR0124_R1	NCOG36
NR0128_R1	NCOG37
NR0132_R1	NCOG38
NR0136_R1	NCOG39
NR0140_R1	NCOG40
NR0144_R1	NCOG41
NR0146_R1	NCOG42
NR0147_R1	NCOG43
NR0151_R1	NCOG44
NR0155_R1	NCOG45
NR0159_R1	NCOG46
NR0163_R1	NCOG47
NR0167_R1	NCOG48
NR0171_R1	NCOG49
NR0175_R1	NCOG50
NR0182_R1	NCOG51
NR0257_R1	NCOG52
NR0261_R1	NCOG53
NR0265_R1	NCOG54
NR0269_R1	NCOG55
NR0274_R1	NCOG56
NR0278_R1	NCOG57
NR0281_R1	NCOG58
NR0285_R1	NCOG59
NR0289_R1	NCOG60
NR0293_R1	NCOG61
NR0297_R1	NCOG62
NR0301_R1	NCOG63
NR0305_R1	NCOG64
NR0309_R1	NCOG65
NR0311_R1	NCOG66
NR0315_R1	NCOG67
NR0319_R1	NCOG68
NR0325_R1	NCOG69
NR0327_R1	NCOG70
NR0331_R1	NCOG71
NR0333_R1	NCOG72
NR0345_R1	NCOG73
NR0352_R1	NCOG74
NR0356_R1	NCOG75
NR0360_R1	NCOG76
NR0366_R1	NCOG77
NR0377_R1	NCOG78
NR0381_R1	NCOG79
NR0388_R1	NCOG80
NR0396_R1	NCOG81
NR0402_R1	NCOG82
NR0406_R1	NCOG83
NR0412_R1	NCOG84
NR0416_R1	NCOG85
NR0420_R1	NCOG86
NR0429_R1	NCOG87
NR0433_R1	NCOG88
NR0442_R1	NCOG89
NR0446_R1	NCOG90
NR0451_R1	NCOG91
NR0452_R1	NCOG92
NR0456_R1	NCOG93
NR0460_R1	NCOG94
NR0469_R1	NCOG95
NR0474_R1	NCOG96
NR0478_R1	NCOG97
NR0482_R1	NCOG98
NR0486_R1	NCOG99
NR0501_R1	NCOG100
NR0505_R1	NCOG101
NR0509_R1	NCOG102
NR0514_R1	NCOG103
NR0516_R1	NCOG104
NR0525_R1	NCOG105
NR0529_R1	NCOG106
NR0533_R1	NCOG107
NR0540_R1	NCOG108
NR0545_R1	NCOG109
NR0549_R1	NCOG110
NR0552_R1	NCOG111
NR0556_R1	NCOG112
NR0546_R1	NCOG113
NR0553_R1	NCOG114
NR0557_R1	NCOG115
NR0004_R1	NCOG116
NR0005_R1	NCOG117
NR0007_R1	NCOG118
NR0009_R1	NCOG119
NR0011_R1	NCOG120
NR0013_R1	NCOG121
NR0015_R1	NCOG122
NR0023_R1	NCOG123
NR0027_R1	NCOG124
NR0031_R1	NCOG125
NR0035_R1	NCOG126
NR0039_R1	NCOG127
NR0042_R1	NCOG128
NR0046_R1	NCOG129
NR0048_R1	NCOG130
NR0052_R1	NCOG131
NR0060_R1	NCOG132
NR0064_R1	NCOG133
NR0068_R1	NCOG134
NR0072_R1	NCOG135
NR0076_R1	NCOG136
NR0080_R1	NCOG137
NR0084_R1	NCOG138
NR0087_R1	NCOG139
NR0091_R1	NCOG140
NR0095_R1	NCOG141
NR0102_R1	NCOG142
NR0104_R1	NCOG143
NR0108_R1	NCOG144
NR0112_R1	NCOG145
NR0115_R1	NCOG146
NR0119_R1	NCOG147
NR0123_R1	NCOG148
NR0127_R1	NCOG149
NR0131_R1	NCOG150
NR0135_R1	NCOG151
NR0139_R1	NCOG152
NR0143_R1	NCOG153
NR0150_R1	NCOG154
NR0154_R1	NCOG155
NR0158_R1	NCOG156
NR0162_R1	NCOG157
NR0166_R1	NCOG158
NR0170_R1	NCOG159
NR0174_R1	NCOG160
NR0178_R1	NCOG161
NR0181_R1	NCOG162
NR0256_R1	NCOG163
NR0260_R1	NCOG164
NR0264_R1	NCOG165
NR0268_R1	NCOG166
NR0272_R1	NCOG167
NR0273_R1	NCOG168
NR0277_R1	NCOG169
NR0280_R1	NCOG170
NR0284_R1	NCOG171
NR0288_R1	NCOG172
NR0292_R1	NCOG173
NR0300_R1	NCOG174
NR0304_R1	NCOG175
NR0308_R1	NCOG176
NR0310_R1	NCOG177
NR0314_R1	NCOG178
NR0318_R1	NCOG179
NR0324_R1	NCOG180
NR0326_R1	NCOG181
NR0330_R1	NCOG182
NR0332_R1	NCOG183
NR0344_R1	NCOG184
NR0355_R1	NCOG185
NR0359_R1	NCOG186
NR0365_R1	NCOG187
NR0376_R1	NCOG188
NR0380_R1	NCOG189
NR0387_R1	NCOG190
NR0395_R1	NCOG191
NR0401_R1	NCOG192
NR0405_R1	NCOG193
NR0411_R1	NCOG194
NR0415_R1	NCOG195
NR0419_R1	NCOG196
NR0423_R1	NCOG197
NR0428_R1	NCOG198
NR0432_R1	NCOG199
NR0441_R1	NCOG200
NR0445_R1	NCOG201
NR0455_R1	NCOG202
NR0459_R1	NCOG203
NR0468_R1	NCOG204
NR0473_R1	NCOG205
NR0477_R1	NCOG206
NR0481_R1	NCOG207
NR0485_R1	NCOG208
NR0500_R1	NCOG209
NR0504_R1	NCOG210
NR0508_R1	NCOG211
NR0513_R1	NCOG212
NR0515_R1	NCOG213
NR0524_R1	NCOG214
NR0528_R1	NCOG215
NR0532_R1	NCOG216
NR0536_R1	NCOG217
NR0539_R1	NCOG218
NR0543_R1	NCOG219
NR0544_R1	NCOG220
NR0548_R1	NCOG221
NR0551_R1	NCOG222
NR0555_R1	NCOG223

## Sheet: metaassembly statistics biotope
Statistics for biotope metaassemblies
statistic \ dataset		BALTIC	CICLOPS	NCOG_polyA	ARCTIC
Assembly	Seqs	523549	768842	3322218	67337751
	Min	200	200	200	200
	Q1	335	476	396	359
	Median	498	847	619	469
	Q3	845	1403	1000	711
	Max	45890	56419	154041	84008
	Mean	813.9	1084	845.1	634.8
	Sd	1163.5	960.9	935.9	507
ORFs	Seqs	831658	1272553	5104607	36976750
	Min	63	66	66	66
	Q1	204	165	171	162
	Median	333	327	306	318
	Q3	555	720	558	492
	Max	19092	18953	28893	54641
	Mean	449.4	547.3	435.2	417.5
	Sd	408.2	597.1	416.9	417.6
Filtered ORFs*	Seqs	432494	1241380	4970179	3186905
	Min	63	66	66	66
	Q1	324	168	174	384
	Median	480	333	312	759
	Q3	750	735	564	1281
	Max	19092	18953	28893	54641
	Mean	610.5	554.2	441.1	949.1
	Sd	459.9	601.5	419.7	800.2
*>10 reads over >10% samples
