# Supplementary material for: Genome-resolved biogeography of Phaeocystales, cosmopolitan bloom-forming algae
Source: Research Square preprint supplement (doi:10.21203/rs.3.rs-4339559/v1), 2024-06-11
Supplement: Supplementary file 6 [file 9ffc81ad3c2f5bfb07caf262.xlsx]

## Sheet: Supplementary Table S5
Supplementary Table S5: Up- and down-regulated functions according to ASC posterior probability associated with higher mitochondrial-to-plastid transcription. Data inferred for Phaglo1-mapping reads from stations with ln(MT/PT transcription) >-2 (high, n=29) and stations with ln(MT/PT transcription) between -4 and -2 (low, n=96). Columns B-D mark the direction of the change, log-e relative expres…
Condition	UP/DOWN	ExpressionDelta	Post-p	BRITE	KEGG Ortholog	Symbol	Description
mito_lo-vs-hi	UPREGULATED	-1.459	0.999	09100 Metabolism;09101 Carbohydrate metabolism;00010 Glycolysis / Gluconeogenesis;K00128	K00128	ALDH	aldehyde dehydrogenase (NAD+) [EC:1.2.1.3]
mito_lo-vs-hi	UPREGULATED	-1.015	0.999	09100 Metabolism;09101 Carbohydrate metabolism;00010 Glycolysis / Gluconeogenesis;K00927	K00927	PGK,	phosphoglycerate kinase [EC:2.7.2.3]
mito_lo-vs-hi	UPREGULATED	-1.472	0.999	09100 Metabolism;09101 Carbohydrate metabolism;00010 Glycolysis / Gluconeogenesis;K01610	K01610	E4.1.1.49,	phosphoenolpyruvate carboxykinase (ATP) [EC:4.1.1.49]
mito_lo-vs-hi	UPREGULATED	-1.195	0.994	09100 Metabolism;09101 Carbohydrate metabolism;00010 Glycolysis / Gluconeogenesis;K01623	K01623	ALDO	fructose-bisphosphate aldolase, class I [EC:4.1.2.13]
mito_lo-vs-hi	UPREGULATED	-1.7	1	09100 Metabolism;09101 Carbohydrate metabolism;00020 Citrate cycle (TCA cycle);K00026	K00026	MDH2	malate dehydrogenase [EC:1.1.1.37]
mito_lo-vs-hi	UPREGULATED	-1.472	0.999	09100 Metabolism;09101 Carbohydrate metabolism;00020 Citrate cycle (TCA cycle);K01610	K01610	E4.1.1.49,	phosphoenolpyruvate carboxykinase (ATP) [EC:4.1.1.49]
mito_lo-vs-hi	UPREGULATED	-1.195	0.994	09100 Metabolism;09101 Carbohydrate metabolism;00030 Pentose phosphate pathway;K01623	K01623	ALDO	fructose-bisphosphate aldolase, class I [EC:4.1.2.13]
mito_lo-vs-hi	UPREGULATED	-1.397	1	09100 Metabolism;09101 Carbohydrate metabolism;00030 Pentose phosphate pathway;K01783	K01783	rpe,	ribulose-phosphate 3-epimerase [EC:5.1.3.1]
mito_lo-vs-hi	UPREGULATED	-1.397	1	09100 Metabolism;09101 Carbohydrate metabolism;00040 Pentose and glucuronate interconversions;K01783	K01783	rpe,	ribulose-phosphate 3-epimerase [EC:5.1.3.1]
mito_lo-vs-hi	UPREGULATED	-1.195	0.994	09100 Metabolism;09101 Carbohydrate metabolism;00051 Fructose and mannose metabolism;K01623	K01623	ALDO	fructose-bisphosphate aldolase, class I [EC:4.1.2.13]
mito_lo-vs-hi	UPREGULATED	-1.459	0.999	09100 Metabolism;09101 Carbohydrate metabolism;00053 Ascorbate and aldarate metabolism;K00128	K00128	ALDH	aldehyde dehydrogenase (NAD+) [EC:1.2.1.3]
mito_lo-vs-hi	UPREGULATED	-1.362	0.996	09100 Metabolism;09101 Carbohydrate metabolism;00520 Amino sugar and nucleotide sugar metabolism;K00326	K00326	CYB5R	cytochrome-b5 reductase [EC:1.6.2.2]
mito_lo-vs-hi	UPREGULATED	-1.265	0.995	09100 Metabolism;09101 Carbohydrate metabolism;00520 Amino sugar and nucleotide sugar metabolism;K00820	K00820	glmS,	glutamine---fructose-6-phosphate transaminase (isomerizing) [EC:2.6.1.16]
mito_lo-vs-hi	UPREGULATED	-1.224	0.995	09100 Metabolism;09101 Carbohydrate metabolism;00520 Amino sugar and nucleotide sugar metabolism;K01183	K01183	E3.2.1.14	chitinase [EC:3.2.1.14]
mito_lo-vs-hi	UPREGULATED	-1.7	1	09100 Metabolism;09101 Carbohydrate metabolism;00620 Pyruvate metabolism;K00026	K00026	MDH2	malate dehydrogenase [EC:1.1.1.37]
mito_lo-vs-hi	UPREGULATED	-1.459	0.999	09100 Metabolism;09101 Carbohydrate metabolism;00620 Pyruvate metabolism;K00128	K00128	ALDH	aldehyde dehydrogenase (NAD+) [EC:1.2.1.3]
mito_lo-vs-hi	UPREGULATED	-1.472	0.999	09100 Metabolism;09101 Carbohydrate metabolism;00620 Pyruvate metabolism;K01610	K01610	E4.1.1.49,	phosphoenolpyruvate carboxykinase (ATP) [EC:4.1.1.49]
mito_lo-vs-hi	UPREGULATED	-1.7	1	09100 Metabolism;09101 Carbohydrate metabolism;00630 Glyoxylate and dicarboxylate metabolism;K00026	K00026	MDH2	malate dehydrogenase [EC:1.1.1.37]
mito_lo-vs-hi	UPREGULATED	-1.206	0.968	09100 Metabolism;09101 Carbohydrate metabolism;00630 Glyoxylate and dicarboxylate metabolism;K00600	K00600	glyA,	glycine hydroxymethyltransferase [EC:2.1.2.1]
mito_lo-vs-hi	UPREGULATED	-1.396	1	09100 Metabolism;09101 Carbohydrate metabolism;00630 Glyoxylate and dicarboxylate metabolism;K01915	K01915	glnA,	glutamine synthetase [EC:6.3.1.2]
mito_lo-vs-hi	UPREGULATED	-1.358	0.971	09100 Metabolism;09102 Energy metabolism;00190 Oxidative phosphorylation;K00339	K00339	nuoJ	NADH-quinone oxidoreductase subunit J [EC:7.1.1.2]
mito_lo-vs-hi	UPREGULATED	-1.594	0.998	09100 Metabolism;09102 Energy metabolism;00190 Oxidative phosphorylation;K00412	K00412	CYTB,	ubiquinol-cytochrome c reductase cytochrome b subunit
mito_lo-vs-hi	UPREGULATED	-1.358	0.971	09100 Metabolism;09102 Energy metabolism;00190 Oxidative phosphorylation;K02108	K02108	ATPF0A,	F-type H+-transporting ATPase subunit a
mito_lo-vs-hi	UPREGULATED	-0.948	1	09100 Metabolism;09102 Energy metabolism;00190 Oxidative phosphorylation;K02114	K02114	ATPF1E,	F-type H+-transporting ATPase subunit epsilon
mito_lo-vs-hi	UPREGULATED	-1.883	1	09100 Metabolism;09102 Energy metabolism;00190 Oxidative phosphorylation;K02115	K02115	ATPF1G,	F-type H+-transporting ATPase subunit gamma
mito_lo-vs-hi	UPREGULATED	-0.948	1	09100 Metabolism;09102 Energy metabolism;00190 Oxidative phosphorylation;K02134	K02134	ATPeF1D,	F-type H+-transporting ATPase subunit delta
mito_lo-vs-hi	UPREGULATED	-1.361	0.999	09100 Metabolism;09102 Energy metabolism;00190 Oxidative phosphorylation;K02155	K02155	ATPeV0C,	V-type H+-transporting ATPase 16kDa proteolipid subunit
mito_lo-vs-hi	UPREGULATED	-1.816	1	09100 Metabolism;09102 Energy metabolism;00190 Oxidative phosphorylation;K02256	K02256	COX1	cytochrome c oxidase subunit 1 [EC:7.1.1.9]
mito_lo-vs-hi	UPREGULATED	-2.06	1	09100 Metabolism;09102 Energy metabolism;00190 Oxidative phosphorylation;K02261	K02261	COX2	cytochrome c oxidase subunit 2
mito_lo-vs-hi	UPREGULATED	-1.786	1	09100 Metabolism;09102 Energy metabolism;00190 Oxidative phosphorylation;K02262	K02262	COX3	cytochrome c oxidase subunit 3
mito_lo-vs-hi	UPREGULATED	-1.786	1	09100 Metabolism;09102 Energy metabolism;00190 Oxidative phosphorylation;K03882	K03882	ND4L	NADH-ubiquinone oxidoreductase chain 4L [EC:7.1.1.2]
mito_lo-vs-hi	UPREGULATED	-1.433	0.987	09100 Metabolism;09102 Energy metabolism;00190 Oxidative phosphorylation;K03955	K03955	NDUFAB1	NADH dehydrogenase (ubiquinone) 1 alpha/beta subcomplex 1, acyl-carrier protein
mito_lo-vs-hi	UPREGULATED	-1.786	1	09100 Metabolism;09102 Energy metabolism;00190 Oxidative phosphorylation;K05576	K05576	ndhE	NAD(P)H-quinone oxidoreductase subunit 4L [EC:7.1.1.2]
mito_lo-vs-hi	UPREGULATED	-1.786	1	09100 Metabolism;09102 Energy metabolism;00190 Oxidative phosphorylation;K05578	K05578	ndhG	NAD(P)H-quinone oxidoreductase subunit 6 [EC:7.1.1.2]
mito_lo-vs-hi	UPREGULATED	-2.083	1	09100 Metabolism;09102 Energy metabolism;00190 Oxidative phosphorylation;K08738	K08738	CYC	cytochrome c
mito_lo-vs-hi	UPREGULATED	-1.358	0.971	09100 Metabolism;09102 Energy metabolism;00195 Photosynthesis;K02108	K02108	ATPF0A,	F-type H+-transporting ATPase subunit a
mito_lo-vs-hi	UPREGULATED	-0.948	1	09100 Metabolism;09102 Energy metabolism;00195 Photosynthesis;K02114	K02114	ATPF1E,	F-type H+-transporting ATPase subunit epsilon
mito_lo-vs-hi	UPREGULATED	-1.883	1	09100 Metabolism;09102 Energy metabolism;00195 Photosynthesis;K02115	K02115	ATPF1G,	F-type H+-transporting ATPase subunit gamma
mito_lo-vs-hi	UPREGULATED	-1.362	1	09100 Metabolism;09102 Energy metabolism;00195 Photosynthesis;K02636	K02636	petC	cytochrome b6-f complex iron-sulfur subunit [EC:7.1.1.6]
mito_lo-vs-hi	UPREGULATED	-1.74	1	09100 Metabolism;09102 Energy metabolism;00195 Photosynthesis;K02638	K02638	petE	plastocyanin
mito_lo-vs-hi	UPREGULATED	-1.195	0.994	09100 Metabolism;09102 Energy metabolism;00195 Photosynthesis;K02639	K02639	petF	ferredoxin
mito_lo-vs-hi	UPREGULATED	-0.933	0.992	09100 Metabolism;09102 Energy metabolism;00195 Photosynthesis;K02689	K02689	psaA	photosystem I P700 chlorophyll a apoprotein A1
mito_lo-vs-hi	UPREGULATED	-0.933	0.992	09100 Metabolism;09102 Energy metabolism;00195 Photosynthesis;K02690	K02690	psaB	photosystem I P700 chlorophyll a apoprotein A2
mito_lo-vs-hi	UPREGULATED	-1.229	0.999	09100 Metabolism;09102 Energy metabolism;00195 Photosynthesis;K02692	K02692	psaD	photosystem I subunit II
mito_lo-vs-hi	UPREGULATED	-1.285	0.998	09100 Metabolism;09102 Energy metabolism;00195 Photosynthesis;K02694	K02694	psaF	photosystem I subunit III
mito_lo-vs-hi	UPREGULATED	-2.349	1	09100 Metabolism;09102 Energy metabolism;00195 Photosynthesis;K02708	K02708	psbF	photosystem II cytochrome b559 subunit beta
mito_lo-vs-hi	UPREGULATED	-1.27	0.981	09100 Metabolism;09102 Energy metabolism;00195 Photosynthesis;K02709	K02709	psbH	photosystem II PsbH protein
mito_lo-vs-hi	UPREGULATED	-2.92	1	09100 Metabolism;09102 Energy metabolism;00195 Photosynthesis;K02713	K02713	psbL	photosystem II PsbL protein
mito_lo-vs-hi	UPREGULATED	-1.396	1	09100 Metabolism;09102 Energy metabolism;00195 Photosynthesis;K02716	K02716	psbO	photosystem II oxygen-evolving enhancer protein 1
mito_lo-vs-hi	UPREGULATED	-1.409	0.989	09100 Metabolism;09102 Energy metabolism;00195 Photosynthesis;K02717	K02717	psbP	photosystem II oxygen-evolving enhancer protein 2
mito_lo-vs-hi	UPREGULATED	-1.332	0.983	09100 Metabolism;09102 Energy metabolism;00196 Photosynthesis - antenna proteins;K08907	K08907	LHCA1	light-harvesting complex I chlorophyll a/b binding protein 1
mito_lo-vs-hi	UPREGULATED	-1.211	1	09100 Metabolism;09102 Energy metabolism;00196 Photosynthesis - antenna proteins;K08908	K08908	LHCA2	light-harvesting complex I chlorophyll a/b binding protein 2
mito_lo-vs-hi	UPREGULATED	-1.58	0.998	09100 Metabolism;09102 Energy metabolism;00196 Photosynthesis - antenna proteins;K08910	K08910	LHCA4	light-harvesting complex I chlorophyll a/b binding protein 4
mito_lo-vs-hi	UPREGULATED	-1.332	0.983	09100 Metabolism;09102 Energy metabolism;00196 Photosynthesis - antenna proteins;K08916	K08916	LHCB5	light-harvesting complex II chlorophyll a/b binding protein 5
mito_lo-vs-hi	UPREGULATED	-1.332	0.983	09100 Metabolism;09102 Energy metabolism;00196 Photosynthesis - antenna proteins;K08917	K08917	LHCB6	light-harvesting complex II chlorophyll a/b binding protein 6
mito_lo-vs-hi	UPREGULATED	-1.206	0.968	09100 Metabolism;09102 Energy metabolism;00680 Methane metabolism;K00600	K00600	glyA,	glycine hydroxymethyltransferase [EC:2.1.2.1]
mito_lo-vs-hi	UPREGULATED	-1.195	0.994	09100 Metabolism;09102 Energy metabolism;00680 Methane metabolism;K01623	K01623	ALDO	fructose-bisphosphate aldolase, class I [EC:4.1.2.13]
mito_lo-vs-hi	UPREGULATED	-1.7	1	09100 Metabolism;09102 Energy metabolism;00710 Carbon fixation in photosynthetic organisms;K00026	K00026	MDH2	malate dehydrogenase [EC:1.1.1.37]
mito_lo-vs-hi	UPREGULATED	-1.015	0.999	09100 Metabolism;09102 Energy metabolism;00710 Carbon fixation in photosynthetic organisms;K00927	K00927	PGK,	phosphoglycerate kinase [EC:2.7.2.3]
mito_lo-vs-hi	UPREGULATED	-1.472	0.999	09100 Metabolism;09102 Energy metabolism;00710 Carbon fixation in photosynthetic organisms;K01610	K01610	E4.1.1.49,	phosphoenolpyruvate carboxykinase (ATP) [EC:4.1.1.49]
mito_lo-vs-hi	UPREGULATED	-1.195	0.994	09100 Metabolism;09102 Energy metabolism;00710 Carbon fixation in photosynthetic organisms;K01623	K01623	ALDO	fructose-bisphosphate aldolase, class I [EC:4.1.2.13]
mito_lo-vs-hi	UPREGULATED	-1.397	1	09100 Metabolism;09102 Energy metabolism;00710 Carbon fixation in photosynthetic organisms;K01783	K01783	rpe,	ribulose-phosphate 3-epimerase [EC:5.1.3.1]
mito_lo-vs-hi	UPREGULATED	-1.396	1	09100 Metabolism;09102 Energy metabolism;00910 Nitrogen metabolism;K01915	K01915	glnA,	glutamine synthetase [EC:6.3.1.2]
mito_lo-vs-hi	UPREGULATED	-1.433	0.987	09100 Metabolism;09103 Lipid metabolism;00061 Fatty acid biosynthesis;K03955	K03955	NDUFAB1	NADH dehydrogenase (ubiquinone) 1 alpha/beta subcomplex 1, acyl-carrier protein
mito_lo-vs-hi	UPREGULATED	-1.459	0.999	09100 Metabolism;09103 Lipid metabolism;00071 Fatty acid degradation;K00128	K00128	ALDH	aldehyde dehydrogenase (NAD+) [EC:1.2.1.3]
mito_lo-vs-hi	UPREGULATED	-1.459	0.999	09100 Metabolism;09103 Lipid metabolism;00561 Glycerolipid metabolism;K00128	K00128	ALDH	aldehyde dehydrogenase (NAD+) [EC:1.2.1.3]
mito_lo-vs-hi	UPREGULATED	-1.158	0.964	09100 Metabolism;09103 Lipid metabolism;00561 Glycerolipid metabolism;K01054	K01054	MGLL	acylglycerol lipase [EC:3.1.1.23]
mito_lo-vs-hi	UPREGULATED	-1.04	0.954	09100 Metabolism;09103 Lipid metabolism;00590 Arachidonic acid metabolism;K04097	K04097	HPGDS	prostaglandin-H2 D-isomerase / glutathione transferase [EC:5.3.99.2 2.5.1.18]
mito_lo-vs-hi	UPREGULATED	-1.538	0.996	09100 Metabolism;09104 Nucleotide metabolism;00230 Purine metabolism;K00940	K00940	ndk,	nucleoside-diphosphate kinase [EC:2.7.4.6]
mito_lo-vs-hi	UPREGULATED	-1.538	0.996	09100 Metabolism;09104 Nucleotide metabolism;00240 Pyrimidine metabolism;K00940	K00940	ndk,	nucleoside-diphosphate kinase [EC:2.7.4.6]
mito_lo-vs-hi	UPREGULATED	-1.396	1	09100 Metabolism;09105 Amino acid metabolism;00220 Arginine biosynthesis;K01915	K01915	glnA,	glutamine synthetase [EC:6.3.1.2]
mito_lo-vs-hi	UPREGULATED	-1.265	0.995	09100 Metabolism;09105 Amino acid metabolism;00250 Alanine, aspartate and glutamate metabolism;K00820	K00820	glmS,	glutamine---fructose-6-phosphate transaminase (isomerizing) [EC:2.6.1.16]
mito_lo-vs-hi	UPREGULATED	-1.396	1	09100 Metabolism;09105 Amino acid metabolism;00250 Alanine, aspartate and glutamate metabolism;K01915	K01915	glnA,	glutamine synthetase [EC:6.3.1.2]
mito_lo-vs-hi	UPREGULATED	-1.164	0.959	09100 Metabolism;09105 Amino acid metabolism;00260 Glycine, serine and threonine metabolism;K00276	K00276	AOC3,	primary-amine oxidase [EC:1.4.3.21]
mito_lo-vs-hi	UPREGULATED	-1.206	0.968	09100 Metabolism;09105 Amino acid metabolism;00260 Glycine, serine and threonine metabolism;K00600	K00600	glyA,	glycine hydroxymethyltransferase [EC:2.1.2.1]
mito_lo-vs-hi	UPREGULATED	-1.7	1	09100 Metabolism;09105 Amino acid metabolism;00270 Cysteine and methionine metabolism;K00026	K00026	MDH2	malate dehydrogenase [EC:1.1.1.37]
mito_lo-vs-hi	UPREGULATED	-1.24	0.968	09100 Metabolism;09105 Amino acid metabolism;00270 Cysteine and methionine metabolism;K21456	K21456	GSS	glutathione synthase [EC:6.3.2.3]
mito_lo-vs-hi	UPREGULATED	-1.459	0.999	09100 Metabolism;09105 Amino acid metabolism;00280 Valine, leucine and isoleucine degradation;K00128	K00128	ALDH	aldehyde dehydrogenase (NAD+) [EC:1.2.1.3]
mito_lo-vs-hi	UPREGULATED	-1.459	0.999	09100 Metabolism;09105 Amino acid metabolism;00310 Lysine degradation;K00128	K00128	ALDH	aldehyde dehydrogenase (NAD+) [EC:1.2.1.3]
mito_lo-vs-hi	UPREGULATED	-1.459	0.999	09100 Metabolism;09105 Amino acid metabolism;00330 Arginine and proline metabolism;K00128	K00128	ALDH	aldehyde dehydrogenase (NAD+) [EC:1.2.1.3]
mito_lo-vs-hi	UPREGULATED	-1.459	0.999	09100 Metabolism;09105 Amino acid metabolism;00340 Histidine metabolism;K00128	K00128	ALDH	aldehyde dehydrogenase (NAD+) [EC:1.2.1.3]
mito_lo-vs-hi	UPREGULATED	-1.164	0.959	09100 Metabolism;09105 Amino acid metabolism;00350 Tyrosine metabolism;K00276	K00276	AOC3,	primary-amine oxidase [EC:1.4.3.21]
mito_lo-vs-hi	UPREGULATED	-1.164	0.959	09100 Metabolism;09105 Amino acid metabolism;00360 Phenylalanine metabolism;K00276	K00276	AOC3,	primary-amine oxidase [EC:1.4.3.21]
mito_lo-vs-hi	UPREGULATED	-1.459	0.999	09100 Metabolism;09105 Amino acid metabolism;00380 Tryptophan metabolism;K00128	K00128	ALDH	aldehyde dehydrogenase (NAD+) [EC:1.2.1.3]
mito_lo-vs-hi	UPREGULATED	-1.459	0.999	09100 Metabolism;09106 Metabolism of other amino acids;00410 beta-Alanine metabolism;K00128	K00128	ALDH	aldehyde dehydrogenase (NAD+) [EC:1.2.1.3]
mito_lo-vs-hi	UPREGULATED	-1.164	0.959	09100 Metabolism;09106 Metabolism of other amino acids;00410 beta-Alanine metabolism;K00276	K00276	AOC3,	primary-amine oxidase [EC:1.4.3.21]
mito_lo-vs-hi	UPREGULATED	-1.631	1	09100 Metabolism;09106 Metabolism of other amino acids;00450 Selenocompound metabolism;K01008	K01008	selD,	selenide, water dikinase [EC:2.7.9.3]
mito_lo-vs-hi	UPREGULATED	-1.206	0.968	09100 Metabolism;09106 Metabolism of other amino acids;00460 Cyanoamino acid metabolism;K00600	K00600	glyA,	glycine hydroxymethyltransferase [EC:2.1.2.1]
mito_lo-vs-hi	UPREGULATED	-1.583	1	09100 Metabolism;09106 Metabolism of other amino acids;00480 Glutathione metabolism;K00432	K00432	gpx,	glutathione peroxidase [EC:1.11.1.9]
mito_lo-vs-hi	UPREGULATED	-1.04	0.954	09100 Metabolism;09106 Metabolism of other amino acids;00480 Glutathione metabolism;K00799	K00799	GST,	glutathione S-transferase [EC:2.5.1.18]
mito_lo-vs-hi	UPREGULATED	-1.04	0.954	09100 Metabolism;09106 Metabolism of other amino acids;00480 Glutathione metabolism;K04097	K04097	HPGDS	prostaglandin-H2 D-isomerase / glutathione transferase [EC:5.3.99.2 2.5.1.18]
mito_lo-vs-hi	UPREGULATED	-1.24	0.968	09100 Metabolism;09106 Metabolism of other amino acids;00480 Glutathione metabolism;K21456	K21456	GSS	glutathione synthase [EC:6.3.2.3]
mito_lo-vs-hi	UPREGULATED	-1.219	0.964	09100 Metabolism;09107 Glycan biosynthesis and metabolism;00563 Glycosylphosphatidylinositol (GPI)-anchor biosynthesis;K07541	K07541	PIGX	GPI mannosyltransferase 1 subunit X
mito_lo-vs-hi	UPREGULATED	-1.206	0.968	09100 Metabolism;09108 Metabolism of cofactors and vitamins;00670 One carbon pool by folate;K00600	K00600	glyA,	glycine hydroxymethyltransferase [EC:2.1.2.1]
mito_lo-vs-hi	UPREGULATED	-2.418	1	09100 Metabolism;09108 Metabolism of cofactors and vitamins;00730 Thiamine metabolism;K03146	K03146	THI4,	cysteine-dependent adenosine diphosphate thiazole synthase [EC:2.4.2.60]
mito_lo-vs-hi	UPREGULATED	-1.7	1	09100 Metabolism;09108 Metabolism of cofactors and vitamins;00760 Nicotinate and nicotinamide metabolism;K06210	K06210	NMNAT	nicotinamide mononucleotide adenylyltransferase [EC:2.7.7.1 2.7.7.18]
mito_lo-vs-hi	UPREGULATED	-1.271	0.959	09100 Metabolism;09108 Metabolism of cofactors and vitamins;00760 Nicotinate and nicotinamide metabolism;K19785	K19785	POF1	nicotinamide-nucleotide adenylyltransferase [EC:2.7.7.1]
mito_lo-vs-hi	UPREGULATED	-1.459	0.999	09100 Metabolism;09108 Metabolism of cofactors and vitamins;00770 Pantothenate and CoA biosynthesis;K00128	K00128	ALDH	aldehyde dehydrogenase (NAD+) [EC:1.2.1.3]
mito_lo-vs-hi	UPREGULATED	-1.219	0.964	09100 Metabolism;09108 Metabolism of cofactors and vitamins;00770 Pantothenate and CoA biosynthesis;K09680	K09680	PANK1_2_3,	type II pantothenate kinase [EC:2.7.1.33]
mito_lo-vs-hi	UPREGULATED	-1.44	0.996	09100 Metabolism;09108 Metabolism of cofactors and vitamins;00785 Lipoic acid metabolism;K03644	K03644	lipA,	lipoyl synthase [EC:2.8.1.8]
mito_lo-vs-hi	UPREGULATED	-1.24	0.968	09100 Metabolism;09109 Metabolism of terpenoids and polyketides;00900 Terpenoid backbone biosynthesis;K05355	K05355	hexPS,	hexaprenyl-diphosphate synthase [EC:2.5.1.82 2.5.1.83]
mito_lo-vs-hi	UPREGULATED	-1.24	0.968	09100 Metabolism;09109 Metabolism of terpenoids and polyketides;00900 Terpenoid backbone biosynthesis;K12505	K12505	PDSS2	decaprenyl-diphosphate synthase subunit 2 [EC:2.5.1.91]
mito_lo-vs-hi	UPREGULATED	-1.459	0.999	09100 Metabolism;09109 Metabolism of terpenoids and polyketides;00903 Limonene degradation;K00128	K00128	ALDH	aldehyde dehydrogenase (NAD+) [EC:1.2.1.3]
mito_lo-vs-hi	UPREGULATED	-1.864	1	09100 Metabolism;09109 Metabolism of terpenoids and polyketides;00908 Zeatin biosynthesis;K00791	K00791	miaA,	tRNA dimethylallyltransferase [EC:2.5.1.75]
mito_lo-vs-hi	UPREGULATED	-1.459	0.999	09100 Metabolism;09109 Metabolism of terpenoids and polyketides;00981 Insect hormone biosynthesis;K00128	K00128	ALDH	aldehyde dehydrogenase (NAD+) [EC:1.2.1.3]
mito_lo-vs-hi	UPREGULATED	-1.164	0.959	09100 Metabolism;09110 Biosynthesis of other secondary metabolites;00950 Isoquinoline alkaloid biosynthesis;K00276	K00276	AOC3,	primary-amine oxidase [EC:1.4.3.21]
mito_lo-vs-hi	UPREGULATED	-1.164	0.959	09100 Metabolism;09110 Biosynthesis of other secondary metabolites;00960 Tropane, piperidine and pyridine alkaloid biosynthesis;K00276	K00276	AOC3,	primary-amine oxidase [EC:1.4.3.21]
mito_lo-vs-hi	UPREGULATED	-1.459	0.999	09100 Metabolism;09111 Xenobiotics biodegradation and metabolism;00625 Chloroalkane and chloroalkene degradation;K00128	K00128	ALDH	aldehyde dehydrogenase (NAD+) [EC:1.2.1.3]
mito_lo-vs-hi	UPREGULATED	-1.04	0.954	09100 Metabolism;09111 Xenobiotics biodegradation and metabolism;00980 Metabolism of xenobiotics by cytochrome P450;K00799	K00799	GST,	glutathione S-transferase [EC:2.5.1.18]
mito_lo-vs-hi	UPREGULATED	-1.04	0.954	09100 Metabolism;09111 Xenobiotics biodegradation and metabolism;00980 Metabolism of xenobiotics by cytochrome P450;K04097	K04097	HPGDS	prostaglandin-H2 D-isomerase / glutathione transferase [EC:5.3.99.2 2.5.1.18]
mito_lo-vs-hi	UPREGULATED	-1.04	0.954	09100 Metabolism;09111 Xenobiotics biodegradation and metabolism;00982 Drug metabolism - cytochrome P450;K00799	K00799	GST,	glutathione S-transferase [EC:2.5.1.18]
mito_lo-vs-hi	UPREGULATED	-1.04	0.954	09100 Metabolism;09111 Xenobiotics biodegradation and metabolism;00982 Drug metabolism - cytochrome P450;K04097	K04097	HPGDS	prostaglandin-H2 D-isomerase / glutathione transferase [EC:5.3.99.2 2.5.1.18]
mito_lo-vs-hi	UPREGULATED	-1.04	0.954	09100 Metabolism;09111 Xenobiotics biodegradation and metabolism;00983 Drug metabolism - other enzymes;K00799	K00799	GST,	glutathione S-transferase [EC:2.5.1.18]
mito_lo-vs-hi	UPREGULATED	-1.538	0.996	09100 Metabolism;09111 Xenobiotics biodegradation and metabolism;00983 Drug metabolism - other enzymes;K00940	K00940	ndk,	nucleoside-diphosphate kinase [EC:2.7.4.6]
mito_lo-vs-hi	UPREGULATED	-1.431	1	09120 Genetic Information Processing;09121 Transcription;03022 Basal transcription factors;K03129	K03129	TAF4	transcription initiation factor TFIID subunit 4
mito_lo-vs-hi	UPREGULATED	-1.837	1	09120 Genetic Information Processing;09121 Transcription;03040 Spliceosome;K11097	K11097	SNRPE,	small nuclear ribonucleoprotein E
mito_lo-vs-hi	UPREGULATED	-1.893	1	09120 Genetic Information Processing;09121 Transcription;03040 Spliceosome;K12867	K12867	SYF1,	pre-mRNA-splicing factor SYF1
mito_lo-vs-hi	UPREGULATED	-1.627	1	09120 Genetic Information Processing;09122 Translation;00970 Aminoacyl-tRNA biosynthesis;K01886	K01886	QARS,	glutaminyl-tRNA synthetase [EC:6.1.1.18]
mito_lo-vs-hi	UPREGULATED	-1.338	0.972	09120 Genetic Information Processing;09122 Translation;03008 Ribosome biogenesis in eukaryotes;K11131	K11131	DKC1,	H/ACA ribonucleoprotein complex subunit 4 [EC:5.4.99.-]
mito_lo-vs-hi	UPREGULATED	-1.083	0.971	09120 Genetic Information Processing;09122 Translation;03008 Ribosome biogenesis in eukaryotes;K14554	K14554	UTP21,	U3 small nucleolar RNA-associated protein 21
mito_lo-vs-hi	UPREGULATED	-1.219	0.964	09120 Genetic Information Processing;09122 Translation;03010 Ribosome;K02863	K02863	RP-L1,	large subunit ribosomal protein L1
mito_lo-vs-hi	UPREGULATED	-1.628	1	09120 Genetic Information Processing;09122 Translation;03010 Ribosome;K02866	K02866	RP-L10e,	large subunit ribosomal protein L10e
mito_lo-vs-hi	UPREGULATED	-1.219	0.964	09120 Genetic Information Processing;09122 Translation;03010 Ribosome;K02867	K02867	RP-L11,	large subunit ribosomal protein L11
mito_lo-vs-hi	UPREGULATED	-1.347	0.994	09120 Genetic Information Processing;09122 Translation;03010 Ribosome;K02871	K02871	RP-L13,	large subunit ribosomal protein L13
mito_lo-vs-hi	UPREGULATED	-1.44	0.996	09120 Genetic Information Processing;09122 Translation;03010 Ribosome;K02872	K02872	RP-L13Ae,	large subunit ribosomal protein L13Ae
mito_lo-vs-hi	UPREGULATED	-1.41	0.985	09120 Genetic Information Processing;09122 Translation;03010 Ribosome;K02873	K02873	RP-L13e,	large subunit ribosomal protein L13e
mito_lo-vs-hi	UPREGULATED	-1.893	1	09120 Genetic Information Processing;09122 Translation;03010 Ribosome;K02875	K02875	RP-L14e,	large subunit ribosomal protein L14e
mito_lo-vs-hi	UPREGULATED	-1.244	0.983	09120 Genetic Information Processing;09122 Translation;03010 Ribosome;K02877	K02877	RP-L15e,	large subunit ribosomal protein L15e
mito_lo-vs-hi	UPREGULATED	-1.46	0.987	09120 Genetic Information Processing;09122 Translation;03010 Ribosome;K02878	K02878	RP-L16,	large subunit ribosomal protein L16
mito_lo-vs-hi	UPREGULATED	-1.164	0.992	09120 Genetic Information Processing;09122 Translation;03010 Ribosome;K02879	K02879	RP-L17,	large subunit ribosomal protein L17
mito_lo-vs-hi	UPREGULATED	-1.165	0.987	09120 Genetic Information Processing;09122 Translation;03010 Ribosome;K02880	K02880	RP-L17e,	large subunit ribosomal protein L17e
mito_lo-vs-hi	UPREGULATED	-1.285	0.959	09120 Genetic Information Processing;09122 Translation;03010 Ribosome;K02883	K02883	RP-L18e,	large subunit ribosomal protein L18e
mito_lo-vs-hi	UPREGULATED	-1.311	0.994	09120 Genetic Information Processing;09122 Translation;03010 Ribosome;K02885	K02885	RP-L19e,	large subunit ribosomal protein L19e
mito_lo-vs-hi	UPREGULATED	-1.494	0.998	09120 Genetic Information Processing;09122 Translation;03010 Ribosome;K02887	K02887	RP-L20,	large subunit ribosomal protein L20
mito_lo-vs-hi	UPREGULATED	-1.447	0.994	09120 Genetic Information Processing;09122 Translation;03010 Ribosome;K02893	K02893	RP-L23Ae,	large subunit ribosomal protein L23Ae
mito_lo-vs-hi	UPREGULATED	-1.167	0.999	09120 Genetic Information Processing;09122 Translation;03010 Ribosome;K02896	K02896	RP-L24e,	large subunit ribosomal protein L24e
mito_lo-vs-hi	UPREGULATED	-1.334	1	09120 Genetic Information Processing;09122 Translation;03010 Ribosome;K02898	K02898	RP-L26e,	large subunit ribosomal protein L26e
mito_lo-vs-hi	UPREGULATED	-1.7	1	09120 Genetic Information Processing;09122 Translation;03010 Ribosome;K02903	K02903	RP-L28e,	large subunit ribosomal protein L28e
mito_lo-vs-hi	UPREGULATED	-1.628	1	09120 Genetic Information Processing;09122 Translation;03010 Ribosome;K02908	K02908	RP-L30e,	large subunit ribosomal protein L30e
mito_lo-vs-hi	UPREGULATED	-1.46	1	09120 Genetic Information Processing;09122 Translation;03010 Ribosome;K02918	K02918	RP-L35e,	large subunit ribosomal protein L35e
mito_lo-vs-hi	UPREGULATED	-1.459	0.999	09120 Genetic Information Processing;09122 Translation;03010 Ribosome;K02922	K02922	RP-L37e,	large subunit ribosomal protein L37e
mito_lo-vs-hi	UPREGULATED	-1.627	1	09120 Genetic Information Processing;09122 Translation;03010 Ribosome;K02924	K02924	RP-L39e,	large subunit ribosomal protein L39e
mito_lo-vs-hi	UPREGULATED	-1.202	0.98	09120 Genetic Information Processing;09122 Translation;03010 Ribosome;K02934	K02934	RP-L6e,	large subunit ribosomal protein L6e
mito_lo-vs-hi	UPREGULATED	-1.792	1	09120 Genetic Information Processing;09122 Translation;03010 Ribosome;K02935	K02935	RP-L7,	large subunit ribosomal protein L7/L12
mito_lo-vs-hi	UPREGULATED	-1.158	0.964	09120 Genetic Information Processing;09122 Translation;03010 Ribosome;K02936	K02936	RP-L7Ae,	large subunit ribosomal protein L7Ae
mito_lo-vs-hi	UPREGULATED	-1.391	1	09120 Genetic Information Processing;09122 Translation;03010 Ribosome;K02938	K02938	RP-L8e,	large subunit ribosomal protein L8e
mito_lo-vs-hi	UPREGULATED	-1.195	0.972	09120 Genetic Information Processing;09122 Translation;03010 Ribosome;K02939	K02939	RP-L9,	large subunit ribosomal protein L9
mito_lo-vs-hi	UPREGULATED	-1.447	0.994	09120 Genetic Information Processing;09122 Translation;03010 Ribosome;K02940	K02940	RP-L9e,	large subunit ribosomal protein L9e
mito_lo-vs-hi	UPREGULATED	-1.338	0.972	09120 Genetic Information Processing;09122 Translation;03010 Ribosome;K02947	K02947	RP-S10e,	small subunit ribosomal protein S10e
mito_lo-vs-hi	UPREGULATED	-1.644	1	09120 Genetic Information Processing;09122 Translation;03010 Ribosome;K02950	K02950	RP-S12,	small subunit ribosomal protein S12
mito_lo-vs-hi	UPREGULATED	-1.472	0.999	09120 Genetic Information Processing;09122 Translation;03010 Ribosome;K02953	K02953	RP-S13e,	small subunit ribosomal protein S13e
mito_lo-vs-hi	UPREGULATED	-1.28	0.994	09120 Genetic Information Processing;09122 Translation;03010 Ribosome;K02956	K02956	RP-S15,	small subunit ribosomal protein S15
mito_lo-vs-hi	UPREGULATED	-1.26	0.981	09120 Genetic Information Processing;09122 Translation;03010 Ribosome;K02961	K02961	RP-S17,	small subunit ribosomal protein S17
mito_lo-vs-hi	UPREGULATED	-1.17	0.983	09120 Genetic Information Processing;09122 Translation;03010 Ribosome;K02962	K02962	RP-S17e,	small subunit ribosomal protein S17e
mito_lo-vs-hi	UPREGULATED	-1.291	0.99	09120 Genetic Information Processing;09122 Translation;03010 Ribosome;K02966	K02966	RP-S19e,	small subunit ribosomal protein S19e
mito_lo-vs-hi	UPREGULATED	-1.631	1	09120 Genetic Information Processing;09122 Translation;03010 Ribosome;K02974	K02974	RP-S24e,	small subunit ribosomal protein S24e
mito_lo-vs-hi	UPREGULATED	-1.673	1	09120 Genetic Information Processing;09122 Translation;03010 Ribosome;K02979	K02979	RP-S28e,	small subunit ribosomal protein S28e
mito_lo-vs-hi	UPREGULATED	-1.116	0.98	09120 Genetic Information Processing;09122 Translation;03010 Ribosome;K02980	K02980	RP-S29e,	small subunit ribosomal protein S29e
mito_lo-vs-hi	UPREGULATED	-1.179	0.98	09120 Genetic Information Processing;09122 Translation;03010 Ribosome;K02981	K02981	RP-S2e,	small subunit ribosomal protein S2e
mito_lo-vs-hi	UPREGULATED	-1.433	1	09120 Genetic Information Processing;09122 Translation;03010 Ribosome;K02983	K02983	RP-S30e,	small subunit ribosomal protein S30e
mito_lo-vs-hi	UPREGULATED	-1.642	1	09120 Genetic Information Processing;09122 Translation;03010 Ribosome;K02987	K02987	RP-S4e,	small subunit ribosomal protein S4e
mito_lo-vs-hi	UPREGULATED	-1.158	1	09120 Genetic Information Processing;09122 Translation;03010 Ribosome;K02989	K02989	RP-S5e,	small subunit ribosomal protein S5e
mito_lo-vs-hi	UPREGULATED	-1.04	0.954	09120 Genetic Information Processing;09122 Translation;03010 Ribosome;K02991	K02991	RP-S6e,	small subunit ribosomal protein S6e
mito_lo-vs-hi	UPREGULATED	-1.323	0.989	09120 Genetic Information Processing;09122 Translation;03013 Nucleocytoplasmic transport;K12160	K12160	SUMO,	small ubiquitin-related modifier
mito_lo-vs-hi	UPREGULATED	-1.459	0.999	09120 Genetic Information Processing;09122 Translation;03015 mRNA surveillance pathway;K06269	K06269	PPP1C	serine/threonine-protein phosphatase PP1 catalytic subunit [EC:3.1.3.16]
mito_lo-vs-hi	UPREGULATED	-1.158	0.964	09120 Genetic Information Processing;09123 Folding, sorting and degradation;03050 Proteasome;K02730	K02730	PSMA6	20S proteasome subunit alpha 1 [EC:3.4.25.1]
mito_lo-vs-hi	UPREGULATED	-1.164	0.959	09120 Genetic Information Processing;09123 Folding, sorting and degradation;03050 Proteasome;K06698	K06698	PSME3	proteasome activator subunit 3 (PA28 gamma)
mito_lo-vs-hi	UPREGULATED	-1.554	1	09120 Genetic Information Processing;09123 Folding, sorting and degradation;04120 Ubiquitin mediated proteolysis;K06643	K06643	MDM2	E3 ubiquitin-protein ligase Mdm2 [EC:2.3.2.27]
mito_lo-vs-hi	UPREGULATED	-1.39	0.995	09120 Genetic Information Processing;09123 Folding, sorting and degradation;04141 Protein processing in endoplasmic reticulum;K09584	K09584	PDIA6,	protein disulfide-isomerase A6 [EC:5.3.4.1]
mito_lo-vs-hi	UPREGULATED	-1.458	1	09120 Genetic Information Processing;09123 Folding, sorting and degradation;04141 Protein processing in endoplasmic reticulum;K09586	K09586	ERP29	endoplasmic reticulum protein 29
mito_lo-vs-hi	UPREGULATED	-1.39	0.995	09120 Genetic Information Processing;09123 Folding, sorting and degradation;04141 Protein processing in endoplasmic reticulum;K13984	K13984	TXNDC5,	thioredoxin domain-containing protein 5 [EC:5.3.4.1]
mito_lo-vs-hi	UPREGULATED	-1.41	0.985	09120 Genetic Information Processing;09124 Replication and repair;03030 DNA replication;K10755	K10755	RFC2_4	replication factor C subunit 2/4
mito_lo-vs-hi	UPREGULATED	-1.41	0.985	09120 Genetic Information Processing;09124 Replication and repair;03410 Base excision repair;K10755	K10755	RFC2_4	replication factor C subunit 2/4
mito_lo-vs-hi	UPREGULATED	-1.41	0.985	09120 Genetic Information Processing;09124 Replication and repair;03420 Nucleotide excision repair;K10755	K10755	RFC2_4	replication factor C subunit 2/4
mito_lo-vs-hi	UPREGULATED	-0.861	0.993	09120 Genetic Information Processing;09124 Replication and repair;03420 Nucleotide excision repair;K10840	K10840	CETN2	centrin-2
mito_lo-vs-hi	UPREGULATED	-1.41	0.985	09120 Genetic Information Processing;09124 Replication and repair;03430 Mismatch repair;K10755	K10755	RFC2_4	replication factor C subunit 2/4
mito_lo-vs-hi	UPREGULATED	-1.158	0.964	09120 Genetic Information Processing;09126 Chromosome;03082 ATP-dependent chromatin remodeling;K11649	K11649	SMARCC	SWI/SNF-related matrix-associated actin-dependent regulator of chromatin subfamily C
mito_lo-vs-hi	UPREGULATED	-1.594	0.998	09130 Environmental Information Processing;09132 Signal transduction;02020 Two-component system;K00412	K00412	CYTB,	ubiquinol-cytochrome c reductase cytochrome b subunit
mito_lo-vs-hi	UPREGULATED	-1.396	1	09130 Environmental Information Processing;09132 Signal transduction;02020 Two-component system;K01915	K01915	glnA,	glutamine synthetase [EC:6.3.1.2]
mito_lo-vs-hi	UPREGULATED	-2.083	1	09130 Environmental Information Processing;09132 Signal transduction;02020 Two-component system;K08738	K08738	CYC	cytochrome c
mito_lo-vs-hi	UPREGULATED	-1.292	0.978	09130 Environmental Information Processing;09132 Signal transduction;04011 MAPK signaling pathway - yeast;K04536	K04536	GNB1	guanine nucleotide-binding protein G(I)/G(S)/G(T) subunit beta-1
mito_lo-vs-hi	UPREGULATED	-1.389	0.989	09130 Environmental Information Processing;09132 Signal transduction;04013 MAPK signaling pathway - fly;K05759	K05759	PFN	profilin
mito_lo-vs-hi	UPREGULATED	-1.292	0.978	09130 Environmental Information Processing;09132 Signal transduction;04014 Ras signaling pathway;K04536	K04536	GNB1	guanine nucleotide-binding protein G(I)/G(S)/G(T) subunit beta-1
mito_lo-vs-hi	UPREGULATED	-1.389	0.989	09130 Environmental Information Processing;09132 Signal transduction;04015 Rap1 signaling pathway;K05759	K05759	PFN	profilin
mito_lo-vs-hi	UPREGULATED	-1.158	0.964	09130 Environmental Information Processing;09132 Signal transduction;04015 Rap1 signaling pathway;K17697	K17697	DOCK4	dedicator of cytokinesis protein 4
mito_lo-vs-hi	UPREGULATED	-1.538	0.996	09130 Environmental Information Processing;09132 Signal transduction;04016 MAPK signaling pathway - plant;K00940	K00940	ndk,	nucleoside-diphosphate kinase [EC:2.7.4.6]
mito_lo-vs-hi	UPREGULATED	-1.04	0.954	09130 Environmental Information Processing;09132 Signal transduction;04016 MAPK signaling pathway - plant;K14498	K14498	SNRK2	serine/threonine-protein kinase SRK2 [EC:2.7.11.1]
mito_lo-vs-hi	UPREGULATED	-1.459	0.999	09130 Environmental Information Processing;09132 Signal transduction;04022 cGMP-PKG signaling pathway;K06269	K06269	PPP1C	serine/threonine-protein phosphatase PP1 catalytic subunit [EC:3.1.3.16]
mito_lo-vs-hi	UPREGULATED	-1.459	0.999	09130 Environmental Information Processing;09132 Signal transduction;04024 cAMP signaling pathway;K06269	K06269	PPP1C	serine/threonine-protein phosphatase PP1 catalytic subunit [EC:3.1.3.16]
mito_lo-vs-hi	UPREGULATED	-1.015	0.999	09130 Environmental Information Processing;09132 Signal transduction;04066 HIF-1 signaling pathway;K00927	K00927	PGK,	phosphoglycerate kinase [EC:2.7.2.3]
mito_lo-vs-hi	UPREGULATED	-1.195	0.994	09130 Environmental Information Processing;09132 Signal transduction;04066 HIF-1 signaling pathway;K01623	K01623	ALDO	fructose-bisphosphate aldolase, class I [EC:4.1.2.13]
mito_lo-vs-hi	UPREGULATED	-1.04	0.954	09130 Environmental Information Processing;09132 Signal transduction;04066 HIF-1 signaling pathway;K02991	K02991	RP-S6e,	small subunit ribosomal protein S6e
mito_lo-vs-hi	UPREGULATED	-1.554	1	09130 Environmental Information Processing;09132 Signal transduction;04068 FoxO signaling pathway;K06643	K06643	MDM2	E3 ubiquitin-protein ligase Mdm2 [EC:2.3.2.27]
mito_lo-vs-hi	UPREGULATED	-1.312	1	09130 Environmental Information Processing;09132 Signal transduction;04068 FoxO signaling pathway;K08341	K08341	GABARAP,	GABA(A) receptor-associated protein
mito_lo-vs-hi	UPREGULATED	-1.047	0.995	09130 Environmental Information Processing;09132 Signal transduction;04071 Sphingolipid signaling pathway;K01379	K01379	CTSD	cathepsin D [EC:3.4.23.5]
mito_lo-vs-hi	UPREGULATED	-1.04	0.954	09130 Environmental Information Processing;09132 Signal transduction;04075 Plant hormone signal transduction;K14498	K14498	SNRK2	serine/threonine-protein kinase SRK2 [EC:2.7.11.1]
mito_lo-vs-hi	UPREGULATED	-1.04	0.954	09130 Environmental Information Processing;09132 Signal transduction;04150 mTOR signaling pathway;K02991	K02991	RP-S6e,	small subunit ribosomal protein S6e
mito_lo-vs-hi	UPREGULATED	-1.158	0.964	09130 Environmental Information Processing;09132 Signal transduction;04150 mTOR signaling pathway;K08272	K08272	CAB39,	calcium binding protein 39
mito_lo-vs-hi	UPREGULATED	-1.04	0.954	09130 Environmental Information Processing;09132 Signal transduction;04151 PI3K-Akt signaling pathway;K02991	K02991	RP-S6e,	small subunit ribosomal protein S6e
mito_lo-vs-hi	UPREGULATED	-1.292	0.978	09130 Environmental Information Processing;09132 Signal transduction;04151 PI3K-Akt signaling pathway;K04536	K04536	GNB1	guanine nucleotide-binding protein G(I)/G(S)/G(T) subunit beta-1
mito_lo-vs-hi	UPREGULATED	-1.28	0.994	09130 Environmental Information Processing;09132 Signal transduction;04151 PI3K-Akt signaling pathway;K05061	K05061	CSF3R,	granulocyte colony-stimulating factor receptor
mito_lo-vs-hi	UPREGULATED	-1.554	1	09130 Environmental Information Processing;09132 Signal transduction;04151 PI3K-Akt signaling pathway;K06643	K06643	MDM2	E3 ubiquitin-protein ligase Mdm2 [EC:2.3.2.27]
mito_lo-vs-hi	UPREGULATED	-1.158	0.964	09130 Environmental Information Processing;09132 Signal transduction;04152 AMPK signaling pathway;K08272	K08272	CAB39,	calcium binding protein 39
mito_lo-vs-hi	UPREGULATED	-1.04	0.954	09130 Environmental Information Processing;09132 Signal transduction;04371 Apelin signaling pathway;K02991	K02991	RP-S6e,	small subunit ribosomal protein S6e
mito_lo-vs-hi	UPREGULATED	-1.292	0.978	09130 Environmental Information Processing;09132 Signal transduction;04371 Apelin signaling pathway;K04536	K04536	GNB1	guanine nucleotide-binding protein G(I)/G(S)/G(T) subunit beta-1
mito_lo-vs-hi	UPREGULATED	-1.459	0.999	09130 Environmental Information Processing;09132 Signal transduction;04390 Hippo signaling pathway;K06269	K06269	PPP1C	serine/threonine-protein phosphatase PP1 catalytic subunit [EC:3.1.3.16]
mito_lo-vs-hi	UPREGULATED	-1.28	0.994	09130 Environmental Information Processing;09132 Signal transduction;04630 JAK-STAT signaling pathway;K05061	K05061	CSF3R,	granulocyte colony-stimulating factor receptor
mito_lo-vs-hi	UPREGULATED	-1.28	0.994	09130 Environmental Information Processing;09133 Signaling molecules and interaction;04060 Cytokine-cytokine receptor interaction;K05061	K05061	CSF3R,	granulocyte colony-stimulating factor receptor
mito_lo-vs-hi	UPREGULATED	-1.312	1	09140 Cellular Processes;09141 Transport and catabolism;04136 Autophagy - other;K08341	K08341	GABARAP,	GABA(A) receptor-associated protein
mito_lo-vs-hi	UPREGULATED	-1.312	1	09140 Cellular Processes;09141 Transport and catabolism;04137 Mitophagy - animal;K08341	K08341	GABARAP,	GABA(A) receptor-associated protein
mito_lo-vs-hi	UPREGULATED	-1.391	0.998	09140 Cellular Processes;09141 Transport and catabolism;04138 Autophagy - yeast;K01381	K01381	PEP4	saccharopepsin [EC:3.4.23.25]
mito_lo-vs-hi	UPREGULATED	-1.219	0.964	09140 Cellular Processes;09141 Transport and catabolism;04138 Autophagy - yeast;K05756	K05756	ARPC3	actin related protein 2/3 complex, subunit 3
mito_lo-vs-hi	UPREGULATED	-1.312	1	09140 Cellular Processes;09141 Transport and catabolism;04138 Autophagy - yeast;K08341	K08341	GABARAP,	GABA(A) receptor-associated protein
mito_lo-vs-hi	UPREGULATED	-1.312	1	09140 Cellular Processes;09141 Transport and catabolism;04139 Mitophagy - yeast;K08341	K08341	GABARAP,	GABA(A) receptor-associated protein
mito_lo-vs-hi	UPREGULATED	-1.047	0.995	09140 Cellular Processes;09141 Transport and catabolism;04140 Autophagy - animal;K01379	K01379	CTSD	cathepsin D [EC:3.4.23.5]
mito_lo-vs-hi	UPREGULATED	-1.312	1	09140 Cellular Processes;09141 Transport and catabolism;04140 Autophagy - animal;K08341	K08341	GABARAP,	GABA(A) receptor-associated protein
mito_lo-vs-hi	UPREGULATED	-1.047	0.995	09140 Cellular Processes;09141 Transport and catabolism;04142 Lysosome;K01379	K01379	CTSD	cathepsin D [EC:3.4.23.5]
mito_lo-vs-hi	UPREGULATED	-1.391	0.998	09140 Cellular Processes;09141 Transport and catabolism;04142 Lysosome;K01382	K01382	CTSE	cathepsin E [EC:3.4.23.34]
mito_lo-vs-hi	UPREGULATED	-1.361	0.999	09140 Cellular Processes;09141 Transport and catabolism;04142 Lysosome;K02155	K02155	ATPeV0C,	V-type H+-transporting ATPase 16kDa proteolipid subunit
mito_lo-vs-hi	UPREGULATED	-1.371	0.989	09140 Cellular Processes;09141 Transport and catabolism;04142 Lysosome;K12385	K12385	NPC1	Niemann-Pick C1 protein
mito_lo-vs-hi	UPREGULATED	-1.219	0.964	09140 Cellular Processes;09141 Transport and catabolism;04144 Endocytosis;K05756	K05756	ARPC3	actin related protein 2/3 complex, subunit 3
mito_lo-vs-hi	UPREGULATED	-1.554	1	09140 Cellular Processes;09141 Transport and catabolism;04144 Endocytosis;K06643	K06643	MDM2	E3 ubiquitin-protein ligase Mdm2 [EC:2.3.2.27]
mito_lo-vs-hi	UPREGULATED	-1.459	0.999	09140 Cellular Processes;09141 Transport and catabolism;04144 Endocytosis;K07891	K07891	RAB22	Ras-related protein Rab-22
mito_lo-vs-hi	UPREGULATED	-1.227	0.959	09140 Cellular Processes;09141 Transport and catabolism;04144 Endocytosis;K10365	K10365	CAPZB	F-actin-capping protein subunit beta
mito_lo-vs-hi	UPREGULATED	-1.389	0.989	09140 Cellular Processes;09141 Transport and catabolism;04144 Endocytosis;K12495	K12495	IQSEC	IQ motif and SEC7 domain-containing protein
mito_lo-vs-hi	UPREGULATED	-1.361	0.999	09140 Cellular Processes;09141 Transport and catabolism;04145 Phagosome;K02155	K02155	ATPeV0C,	V-type H+-transporting ATPase 16kDa proteolipid subunit
mito_lo-vs-hi	UPREGULATED	-1.668	0.999	09140 Cellular Processes;09141 Transport and catabolism;04145 Phagosome;K06560	K06560	MRC,	mannose receptor, C type
mito_lo-vs-hi	UPREGULATED	-1.312	1	09140 Cellular Processes;09141 Transport and catabolism;04146 Peroxisome;K13335	K13335	PEX16	peroxin-16
mito_lo-vs-hi	UPREGULATED	-1.219	0.964	09140 Cellular Processes;09142 Cell motility;04810 Regulation of actin cytoskeleton;K05756	K05756	ARPC3	actin related protein 2/3 complex, subunit 3
mito_lo-vs-hi	UPREGULATED	-1.389	0.989	09140 Cellular Processes;09142 Cell motility;04810 Regulation of actin cytoskeleton;K05759	K05759	PFN	profilin
mito_lo-vs-hi	UPREGULATED	-1.735	1	09140 Cellular Processes;09142 Cell motility;04810 Regulation of actin cytoskeleton;K05765	K05765	CFL	cofilin
mito_lo-vs-hi	UPREGULATED	-1.459	0.999	09140 Cellular Processes;09142 Cell motility;04810 Regulation of actin cytoskeleton;K06269	K06269	PPP1C	serine/threonine-protein phosphatase PP1 catalytic subunit [EC:3.1.3.16]
mito_lo-vs-hi	UPREGULATED	-1.227	0.959	09140 Cellular Processes;09142 Cell motility;04814 Motor proteins;K10365	K10365	CAPZB	F-actin-capping protein subunit beta
mito_lo-vs-hi	UPREGULATED	-1.11	0.996	09140 Cellular Processes;09142 Cell motility;04814 Motor proteins;K10418	K10418	DYNLL	dynein light chain LC8-type
mito_lo-vs-hi	UPREGULATED	-1.142	0.98	09140 Cellular Processes;09142 Cell motility;04814 Motor proteins;K10420	K10420	DYNLT1_3	dynein light chain Tctex-type 1/3
mito_lo-vs-hi	UPREGULATED	-1.327	0.981	09140 Cellular Processes;09143 Cell growth and death;04110 Cell cycle;K02537	K02537	MAD2	mitotic spindle assembly checkpoint protein MAD2
mito_lo-vs-hi	UPREGULATED	-1.554	1	09140 Cellular Processes;09143 Cell growth and death;04110 Cell cycle;K06643	K06643	MDM2	E3 ubiquitin-protein ligase Mdm2 [EC:2.3.2.27]
mito_lo-vs-hi	UPREGULATED	-1.327	0.981	09140 Cellular Processes;09143 Cell growth and death;04111 Cell cycle - yeast;K02537	K02537	MAD2	mitotic spindle assembly checkpoint protein MAD2
mito_lo-vs-hi	UPREGULATED	-1.17	0.983	09140 Cellular Processes;09143 Cell growth and death;04111 Cell cycle - yeast;K06674	K06674	SMC2	structural maintenance of chromosome 2
mito_lo-vs-hi	UPREGULATED	-1.615	1	09140 Cellular Processes;09143 Cell growth and death;04112 Cell cycle - Caulobacter;K01358	K01358	clpP,	ATP-dependent Clp protease, protease subunit [EC:3.4.21.92]
mito_lo-vs-hi	UPREGULATED	-1.327	0.981	09140 Cellular Processes;09143 Cell growth and death;04113 Meiosis - yeast;K02537	K02537	MAD2	mitotic spindle assembly checkpoint protein MAD2
mito_lo-vs-hi	UPREGULATED	-1.459	0.999	09140 Cellular Processes;09143 Cell growth and death;04113 Meiosis - yeast;K06269	K06269	PPP1C	serine/threonine-protein phosphatase PP1 catalytic subunit [EC:3.1.3.16]
mito_lo-vs-hi	UPREGULATED	-1.327	0.981	09140 Cellular Processes;09143 Cell growth and death;04114 Oocyte meiosis;K02537	K02537	MAD2	mitotic spindle assembly checkpoint protein MAD2
mito_lo-vs-hi	UPREGULATED	-1.459	0.999	09140 Cellular Processes;09143 Cell growth and death;04114 Oocyte meiosis;K06269	K06269	PPP1C	serine/threonine-protein phosphatase PP1 catalytic subunit [EC:3.1.3.16]
mito_lo-vs-hi	UPREGULATED	-1.554	1	09140 Cellular Processes;09143 Cell growth and death;04115 p53 signaling pathway;K06643	K06643	MDM2	E3 ubiquitin-protein ligase Mdm2 [EC:2.3.2.27]
mito_lo-vs-hi	UPREGULATED	-2.083	1	09140 Cellular Processes;09143 Cell growth and death;04115 p53 signaling pathway;K08738	K08738	CYC	cytochrome c
mito_lo-vs-hi	UPREGULATED	-1.047	0.995	09140 Cellular Processes;09143 Cell growth and death;04210 Apoptosis;K01379	K01379	CTSD	cathepsin D [EC:3.4.23.5]
mito_lo-vs-hi	UPREGULATED	-1.04	0.954	09140 Cellular Processes;09143 Cell growth and death;04210 Apoptosis;K07611	K07611	LMNB	lamin B
mito_lo-vs-hi	UPREGULATED	-2.083	1	09140 Cellular Processes;09143 Cell growth and death;04210 Apoptosis;K08738	K08738	CYC	cytochrome c
mito_lo-vs-hi	UPREGULATED	-1.04	0.954	09140 Cellular Processes;09143 Cell growth and death;04214 Apoptosis - fly;K07611	K07611	LMNB	lamin B
mito_lo-vs-hi	UPREGULATED	-2.083	1	09140 Cellular Processes;09143 Cell growth and death;04214 Apoptosis - fly;K08738	K08738	CYC	cytochrome c
mito_lo-vs-hi	UPREGULATED	-2.083	1	09140 Cellular Processes;09143 Cell growth and death;04215 Apoptosis - multiple species;K08738	K08738	CYC	cytochrome c
mito_lo-vs-hi	UPREGULATED	-1.24	0.968	09140 Cellular Processes;09143 Cell growth and death;04216 Ferroptosis;K21456	K21456	GSS	glutathione synthase [EC:6.3.2.3]
mito_lo-vs-hi	UPREGULATED	-1.396	1	09140 Cellular Processes;09143 Cell growth and death;04217 Necroptosis;K01915	K01915	glnA,	glutamine synthetase [EC:6.3.1.2]
mito_lo-vs-hi	UPREGULATED	-1.459	0.999	09140 Cellular Processes;09143 Cell growth and death;04218 Cellular senescence;K06269	K06269	PPP1C	serine/threonine-protein phosphatase PP1 catalytic subunit [EC:3.1.3.16]
mito_lo-vs-hi	UPREGULATED	-1.554	1	09140 Cellular Processes;09143 Cell growth and death;04218 Cellular senescence;K06643	K06643	MDM2	E3 ubiquitin-protein ligase Mdm2 [EC:2.3.2.27]
mito_lo-vs-hi	UPREGULATED	-1.459	0.999	09140 Cellular Processes;09144 Cellular community - eukaryotes;04510 Focal adhesion;K06269	K06269	PPP1C	serine/threonine-protein phosphatase PP1 catalytic subunit [EC:3.1.3.16]
mito_lo-vs-hi	UPREGULATED	-1.219	0.964	09140 Cellular Processes;09144 Cellular community - eukaryotes;04530 Tight junction;K05756	K05756	ARPC3	actin related protein 2/3 complex, subunit 3
mito_lo-vs-hi	UPREGULATED	-1.358	0.971	09181 Protein families: metabolism;00194 Photosynthesis proteins;K02108	K02108	ATPF0A,	F-type H+-transporting ATPase subunit a
mito_lo-vs-hi	UPREGULATED	-0.948	1	09181 Protein families: metabolism;00194 Photosynthesis proteins;K02114	K02114	ATPF1E,	F-type H+-transporting ATPase subunit epsilon
mito_lo-vs-hi	UPREGULATED	-1.883	1	09181 Protein families: metabolism;00194 Photosynthesis proteins;K02115	K02115	ATPF1G,	F-type H+-transporting ATPase subunit gamma
mito_lo-vs-hi	UPREGULATED	-1.362	1	09181 Protein families: metabolism;00194 Photosynthesis proteins;K02636	K02636	petC	cytochrome b6-f complex iron-sulfur subunit [EC:7.1.1.6]
mito_lo-vs-hi	UPREGULATED	-1.74	1	09181 Protein families: metabolism;00194 Photosynthesis proteins;K02638	K02638	petE	plastocyanin
mito_lo-vs-hi	UPREGULATED	-1.195	0.994	09181 Protein families: metabolism;00194 Photosynthesis proteins;K02639	K02639	petF	ferredoxin
mito_lo-vs-hi	UPREGULATED	-0.933	0.992	09181 Protein families: metabolism;00194 Photosynthesis proteins;K02689	K02689	psaA	photosystem I P700 chlorophyll a apoprotein A1
mito_lo-vs-hi	UPREGULATED	-0.933	0.992	09181 Protein families: metabolism;00194 Photosynthesis proteins;K02690	K02690	psaB	photosystem I P700 chlorophyll a apoprotein A2
mito_lo-vs-hi	UPREGULATED	-1.229	0.999	09181 Protein families: metabolism;00194 Photosynthesis proteins;K02692	K02692	psaD	photosystem I subunit II
mito_lo-vs-hi	UPREGULATED	-1.285	0.998	09181 Protein families: metabolism;00194 Photosynthesis proteins;K02694	K02694	psaF	photosystem I subunit III
mito_lo-vs-hi	UPREGULATED	-2.349	1	09181 Protein families: metabolism;00194 Photosynthesis proteins;K02708	K02708	psbF	photosystem II cytochrome b559 subunit beta
mito_lo-vs-hi	UPREGULATED	-1.27	0.981	09181 Protein families: metabolism;00194 Photosynthesis proteins;K02709	K02709	psbH	photosystem II PsbH protein
mito_lo-vs-hi	UPREGULATED	-2.92	1	09181 Protein families: metabolism;00194 Photosynthesis proteins;K02713	K02713	psbL	photosystem II PsbL protein
mito_lo-vs-hi	UPREGULATED	-1.396	1	09181 Protein families: metabolism;00194 Photosynthesis proteins;K02716	K02716	psbO	photosystem II oxygen-evolving enhancer protein 1
mito_lo-vs-hi	UPREGULATED	-1.409	0.989	09181 Protein families: metabolism;00194 Photosynthesis proteins;K02717	K02717	psbP	photosystem II oxygen-evolving enhancer protein 2
mito_lo-vs-hi	UPREGULATED	-1.332	0.983	09181 Protein families: metabolism;00194 Photosynthesis proteins;K08907	K08907	LHCA1	light-harvesting complex I chlorophyll a/b binding protein 1
mito_lo-vs-hi	UPREGULATED	-1.211	1	09181 Protein families: metabolism;00194 Photosynthesis proteins;K08908	K08908	LHCA2	light-harvesting complex I chlorophyll a/b binding protein 2
mito_lo-vs-hi	UPREGULATED	-1.58	0.998	09181 Protein families: metabolism;00194 Photosynthesis proteins;K08910	K08910	LHCA4	light-harvesting complex I chlorophyll a/b binding protein 4
mito_lo-vs-hi	UPREGULATED	-1.332	0.983	09181 Protein families: metabolism;00194 Photosynthesis proteins;K08916	K08916	LHCB5	light-harvesting complex II chlorophyll a/b binding protein 5
mito_lo-vs-hi	UPREGULATED	-1.332	0.983	09181 Protein families: metabolism;00194 Photosynthesis proteins;K08917	K08917	LHCB6	light-harvesting complex II chlorophyll a/b binding protein 6
mito_lo-vs-hi	UPREGULATED	-1.132	0.975	09181 Protein families: metabolism;01001 Protein kinases;K08798	K08798	MARK	MAP/microtubule affinity-regulating kinase [EC:2.7.11.1]
mito_lo-vs-hi	UPREGULATED	-1.04	0.954	09181 Protein families: metabolism;01001 Protein kinases;K14498	K14498	SNRK2	serine/threonine-protein kinase SRK2 [EC:2.7.11.1]
mito_lo-vs-hi	UPREGULATED	-1.371	0.989	09181 Protein families: metabolism;01002 Peptidases and inhibitors;K00683	K00683	QPCT	glutaminyl-peptide cyclotransferase [EC:2.3.2.5]
mito_lo-vs-hi	UPREGULATED	-1.265	0.995	09181 Protein families: metabolism;01002 Peptidases and inhibitors;K00820	K00820	glmS,	glutamine---fructose-6-phosphate transaminase (isomerizing) [EC:2.6.1.16]
mito_lo-vs-hi	UPREGULATED	-1.158	0.964	09181 Protein families: metabolism;01002 Peptidases and inhibitors;K01054	K01054	MGLL	acylglycerol lipase [EC:3.1.1.23]
mito_lo-vs-hi	UPREGULATED	-1.615	1	09181 Protein families: metabolism;01002 Peptidases and inhibitors;K01358	K01358	clpP,	ATP-dependent Clp protease, protease subunit [EC:3.4.21.92]
mito_lo-vs-hi	UPREGULATED	-1.047	0.995	09181 Protein families: metabolism;01002 Peptidases and inhibitors;K01379	K01379	CTSD	cathepsin D [EC:3.4.23.5]
mito_lo-vs-hi	UPREGULATED	-1.391	0.998	09181 Protein families: metabolism;01002 Peptidases and inhibitors;K01381	K01381	PEP4	saccharopepsin [EC:3.4.23.25]
mito_lo-vs-hi	UPREGULATED	-1.391	0.998	09181 Protein families: metabolism;01002 Peptidases and inhibitors;K01382	K01382	CTSE	cathepsin E [EC:3.4.23.34]
mito_lo-vs-hi	UPREGULATED	-1.158	0.964	09181 Protein families: metabolism;01002 Peptidases and inhibitors;K02730	K02730	PSMA6	20S proteasome subunit alpha 1 [EC:3.4.25.1]
mito_lo-vs-hi	UPREGULATED	-1.04	0.954	09181 Protein families: metabolism;01002 Peptidases and inhibitors;K13022	K13022	CPZ	carboxypeptidase Z [EC:3.4.17.-]
mito_lo-vs-hi	UPREGULATED	-1.864	1	09181 Protein families: metabolism;01006 Prenyltransferases;K00791	K00791	miaA,	tRNA dimethylallyltransferase [EC:2.5.1.75]
mito_lo-vs-hi	UPREGULATED	-1.24	0.968	09181 Protein families: metabolism;01006 Prenyltransferases;K05355	K05355	hexPS,	hexaprenyl-diphosphate synthase [EC:2.5.1.82 2.5.1.83]
mito_lo-vs-hi	UPREGULATED	-1.24	0.968	09181 Protein families: metabolism;01006 Prenyltransferases;K12505	K12505	PDSS2	decaprenyl-diphosphate synthase subunit 2 [EC:2.5.1.91]
mito_lo-vs-hi	UPREGULATED	-1.627	1	09181 Protein families: metabolism;01007 Amino acid related enzymes;K01886	K01886	QARS,	glutaminyl-tRNA synthetase [EC:6.1.1.18]
mito_lo-vs-hi	UPREGULATED	-1.459	0.999	09181 Protein families: metabolism;01009 Protein phosphatases and associated proteins;K06269	K06269	PPP1C	serine/threonine-protein phosphatase PP1 catalytic subunit [EC:3.1.3.16]
mito_lo-vs-hi	UPREGULATED	-1.389	0.989	09181 Protein families: metabolism;01009 Protein phosphatases and associated proteins;K11446	K11446	KDM5,	[histone H3]-trimethyl-L-lysine4 demethylase [EC:1.14.11.67]
mito_lo-vs-hi	UPREGULATED	-1.195	0.994	09181 Protein families: metabolism;01009 Protein phosphatases and associated proteins;K15423	K15423	PPP4C	serine/threonine-protein phosphatase 4 catalytic subunit [EC:3.1.3.16]
mito_lo-vs-hi	UPREGULATED	-1.356	0.998	09181 Protein families: metabolism;01009 Protein phosphatases and associated proteins;K17609	K17609	NXN	nucleoredoxin [EC:1.8.1.8]
mito_lo-vs-hi	UPREGULATED	-1.338	0.972	09182 Protein families: genetic information processing;03000 Transcription factors;K09422	K09422	MYBP	transcription factor MYB, plant
mito_lo-vs-hi	UPREGULATED	-1.158	0.964	09182 Protein families: genetic information processing;03009 Ribosome biogenesis;K02936	K02936	RP-L7Ae,	large subunit ribosomal protein L7Ae
mito_lo-vs-hi	UPREGULATED	-1.338	0.972	09182 Protein families: genetic information processing;03009 Ribosome biogenesis;K11131	K11131	DKC1,	H/ACA ribonucleoprotein complex subunit 4 [EC:5.4.99.-]
mito_lo-vs-hi	UPREGULATED	-1.083	0.971	09182 Protein families: genetic information processing;03009 Ribosome biogenesis;K14554	K14554	UTP21,	U3 small nucleolar RNA-associated protein 21
mito_lo-vs-hi	UPREGULATED	-1.17	0.983	09182 Protein families: genetic information processing;03009 Ribosome biogenesis;K14807	K14807	DDX51,	ATP-dependent RNA helicase DDX51/DBP6 [EC:3.6.4.13]
mito_lo-vs-hi	UPREGULATED	-1.219	0.964	09182 Protein families: genetic information processing;03011 Ribosome;K02863	K02863	RP-L1,	large subunit ribosomal protein L1
mito_lo-vs-hi	UPREGULATED	-1.628	1	09182 Protein families: genetic information processing;03011 Ribosome;K02866	K02866	RP-L10e,	large subunit ribosomal protein L10e
mito_lo-vs-hi	UPREGULATED	-1.219	0.964	09182 Protein families: genetic information processing;03011 Ribosome;K02867	K02867	RP-L11,	large subunit ribosomal protein L11
mito_lo-vs-hi	UPREGULATED	-1.347	0.994	09182 Protein families: genetic information processing;03011 Ribosome;K02871	K02871	RP-L13,	large subunit ribosomal protein L13
mito_lo-vs-hi	UPREGULATED	-1.44	0.996	09182 Protein families: genetic information processing;03011 Ribosome;K02872	K02872	RP-L13Ae,	large subunit ribosomal protein L13Ae
mito_lo-vs-hi	UPREGULATED	-1.41	0.985	09182 Protein families: genetic information processing;03011 Ribosome;K02873	K02873	RP-L13e,	large subunit ribosomal protein L13e
mito_lo-vs-hi	UPREGULATED	-1.893	1	09182 Protein families: genetic information processing;03011 Ribosome;K02875	K02875	RP-L14e,	large subunit ribosomal protein L14e
mito_lo-vs-hi	UPREGULATED	-1.244	0.983	09182 Protein families: genetic information processing;03011 Ribosome;K02877	K02877	RP-L15e,	large subunit ribosomal protein L15e
mito_lo-vs-hi	UPREGULATED	-1.46	0.987	09182 Protein families: genetic information processing;03011 Ribosome;K02878	K02878	RP-L16,	large subunit ribosomal protein L16
mito_lo-vs-hi	UPREGULATED	-1.164	0.992	09182 Protein families: genetic information processing;03011 Ribosome;K02879	K02879	RP-L17,	large subunit ribosomal protein L17
mito_lo-vs-hi	UPREGULATED	-1.165	0.987	09182 Protein families: genetic information processing;03011 Ribosome;K02880	K02880	RP-L17e,	large subunit ribosomal protein L17e
mito_lo-vs-hi	UPREGULATED	-1.285	0.959	09182 Protein families: genetic information processing;03011 Ribosome;K02883	K02883	RP-L18e,	large subunit ribosomal protein L18e
mito_lo-vs-hi	UPREGULATED	-1.311	0.994	09182 Protein families: genetic information processing;03011 Ribosome;K02885	K02885	RP-L19e,	large subunit ribosomal protein L19e
mito_lo-vs-hi	UPREGULATED	-1.494	0.998	09182 Protein families: genetic information processing;03011 Ribosome;K02887	K02887	RP-L20,	large subunit ribosomal protein L20
mito_lo-vs-hi	UPREGULATED	-1.447	0.994	09182 Protein families: genetic information processing;03011 Ribosome;K02893	K02893	RP-L23Ae,	large subunit ribosomal protein L23Ae
mito_lo-vs-hi	UPREGULATED	-1.167	0.999	09182 Protein families: genetic information processing;03011 Ribosome;K02896	K02896	RP-L24e,	large subunit ribosomal protein L24e
mito_lo-vs-hi	UPREGULATED	-1.334	1	09182 Protein families: genetic information processing;03011 Ribosome;K02898	K02898	RP-L26e,	large subunit ribosomal protein L26e
mito_lo-vs-hi	UPREGULATED	-1.7	1	09182 Protein families: genetic information processing;03011 Ribosome;K02903	K02903	RP-L28e,	large subunit ribosomal protein L28e
mito_lo-vs-hi	UPREGULATED	-1.628	1	09182 Protein families: genetic information processing;03011 Ribosome;K02908	K02908	RP-L30e,	large subunit ribosomal protein L30e
mito_lo-vs-hi	UPREGULATED	-1.46	1	09182 Protein families: genetic information processing;03011 Ribosome;K02918	K02918	RP-L35e,	large subunit ribosomal protein L35e
mito_lo-vs-hi	UPREGULATED	-1.459	0.999	09182 Protein families: genetic information processing;03011 Ribosome;K02922	K02922	RP-L37e,	large subunit ribosomal protein L37e
mito_lo-vs-hi	UPREGULATED	-1.627	1	09182 Protein families: genetic information processing;03011 Ribosome;K02924	K02924	RP-L39e,	large subunit ribosomal protein L39e
mito_lo-vs-hi	UPREGULATED	-1.202	0.98	09182 Protein families: genetic information processing;03011 Ribosome;K02934	K02934	RP-L6e,	large subunit ribosomal protein L6e
mito_lo-vs-hi	UPREGULATED	-1.792	1	09182 Protein families: genetic information processing;03011 Ribosome;K02935	K02935	RP-L7,	large subunit ribosomal protein L7/L12
mito_lo-vs-hi	UPREGULATED	-1.158	0.964	09182 Protein families: genetic information processing;03011 Ribosome;K02936	K02936	RP-L7Ae,	large subunit ribosomal protein L7Ae
mito_lo-vs-hi	UPREGULATED	-1.391	1	09182 Protein families: genetic information processing;03011 Ribosome;K02938	K02938	RP-L8e,	large subunit ribosomal protein L8e
mito_lo-vs-hi	UPREGULATED	-1.195	0.972	09182 Protein families: genetic information processing;03011 Ribosome;K02939	K02939	RP-L9,	large subunit ribosomal protein L9
mito_lo-vs-hi	UPREGULATED	-1.447	0.994	09182 Protein families: genetic information processing;03011 Ribosome;K02940	K02940	RP-L9e,	large subunit ribosomal protein L9e
mito_lo-vs-hi	UPREGULATED	-1.338	0.972	09182 Protein families: genetic information processing;03011 Ribosome;K02947	K02947	RP-S10e,	small subunit ribosomal protein S10e
mito_lo-vs-hi	UPREGULATED	-1.644	1	09182 Protein families: genetic information processing;03011 Ribosome;K02950	K02950	RP-S12,	small subunit ribosomal protein S12
mito_lo-vs-hi	UPREGULATED	-1.472	0.999	09182 Protein families: genetic information processing;03011 Ribosome;K02953	K02953	RP-S13e,	small subunit ribosomal protein S13e
mito_lo-vs-hi	UPREGULATED	-1.28	0.994	09182 Protein families: genetic information processing;03011 Ribosome;K02956	K02956	RP-S15,	small subunit ribosomal protein S15
mito_lo-vs-hi	UPREGULATED	-1.26	0.981	09182 Protein families: genetic information processing;03011 Ribosome;K02961	K02961	RP-S17,	small subunit ribosomal protein S17
mito_lo-vs-hi	UPREGULATED	-1.17	0.983	09182 Protein families: genetic information processing;03011 Ribosome;K02962	K02962	RP-S17e,	small subunit ribosomal protein S17e
mito_lo-vs-hi	UPREGULATED	-1.291	0.99	09182 Protein families: genetic information processing;03011 Ribosome;K02966	K02966	RP-S19e,	small subunit ribosomal protein S19e
mito_lo-vs-hi	UPREGULATED	-1.631	1	09182 Protein families: genetic information processing;03011 Ribosome;K02974	K02974	RP-S24e,	small subunit ribosomal protein S24e
mito_lo-vs-hi	UPREGULATED	-1.673	1	09182 Protein families: genetic information processing;03011 Ribosome;K02979	K02979	RP-S28e,	small subunit ribosomal protein S28e
mito_lo-vs-hi	UPREGULATED	-1.116	0.98	09182 Protein families: genetic information processing;03011 Ribosome;K02980	K02980	RP-S29e,	small subunit ribosomal protein S29e
mito_lo-vs-hi	UPREGULATED	-1.179	0.98	09182 Protein families: genetic information processing;03011 Ribosome;K02981	K02981	RP-S2e,	small subunit ribosomal protein S2e
mito_lo-vs-hi	UPREGULATED	-1.433	1	09182 Protein families: genetic information processing;03011 Ribosome;K02983	K02983	RP-S30e,	small subunit ribosomal protein S30e
mito_lo-vs-hi	UPREGULATED	-1.642	1	09182 Protein families: genetic information processing;03011 Ribosome;K02987	K02987	RP-S4e,	small subunit ribosomal protein S4e
mito_lo-vs-hi	UPREGULATED	-1.158	1	09182 Protein families: genetic information processing;03011 Ribosome;K02989	K02989	RP-S5e,	small subunit ribosomal protein S5e
mito_lo-vs-hi	UPREGULATED	-1.04	0.954	09182 Protein families: genetic information processing;03011 Ribosome;K02991	K02991	RP-S6e,	small subunit ribosomal protein S6e
mito_lo-vs-hi	UPREGULATED	-1.968	1	09182 Protein families: genetic information processing;03011 Ribosome;K19032	K19032	PSRP3	30S ribosomal protein 3
mito_lo-vs-hi	UPREGULATED	-1.358	0.971	09182 Protein families: genetic information processing;03012 Translation factors;K02357	K02357	tsf,	elongation factor Ts
mito_lo-vs-hi	UPREGULATED	-1.673	1	09182 Protein families: genetic information processing;03012 Translation factors;K02493	K02493	hemK,	release factor glutamine methyltransferase [EC:2.1.1.297]
mito_lo-vs-hi	UPREGULATED	-1.864	1	09182 Protein families: genetic information processing;03016 Transfer RNA biogenesis;K00791	K00791	miaA,	tRNA dimethylallyltransferase [EC:2.5.1.75]
mito_lo-vs-hi	UPREGULATED	-1.631	1	09182 Protein families: genetic information processing;03016 Transfer RNA biogenesis;K01008	K01008	selD,	selenide, water dikinase [EC:2.7.9.3]
mito_lo-vs-hi	UPREGULATED	-1.627	1	09182 Protein families: genetic information processing;03016 Transfer RNA biogenesis;K01886	K01886	QARS,	glutaminyl-tRNA synthetase [EC:6.1.1.18]
mito_lo-vs-hi	UPREGULATED	-1.459	0.999	09182 Protein families: genetic information processing;03019 Messenger RNA biogenesis;K06269	K06269	PPP1C	serine/threonine-protein phosphatase PP1 catalytic subunit [EC:3.1.3.16]
mito_lo-vs-hi	UPREGULATED	-1.285	0.959	09182 Protein families: genetic information processing;03019 Messenger RNA biogenesis;K07575	K07575	MCTS,	malignant T-cell-amplified sequence
mito_lo-vs-hi	UPREGULATED	-0.861	0.993	09182 Protein families: genetic information processing;03019 Messenger RNA biogenesis;K10840	K10840	CETN2	centrin-2
mito_lo-vs-hi	UPREGULATED	-1.837	1	09182 Protein families: genetic information processing;03019 Messenger RNA biogenesis;K11097	K11097	SNRPE,	small nuclear ribonucleoprotein E
mito_lo-vs-hi	UPREGULATED	-1.893	1	09182 Protein families: genetic information processing;03019 Messenger RNA biogenesis;K12867	K12867	SYF1,	pre-mRNA-splicing factor SYF1
mito_lo-vs-hi	UPREGULATED	-1.058	0.954	09182 Protein families: genetic information processing;03019 Messenger RNA biogenesis;K13190	K13190	RBM15	RNA-binding protein 15
mito_lo-vs-hi	UPREGULATED	-1.597	0.999	09182 Protein families: genetic information processing;03019 Messenger RNA biogenesis;K18749	K18749	LSM14,	protein LSM14
mito_lo-vs-hi	UPREGULATED	-1.468	0.999	09182 Protein families: genetic information processing;03019 Messenger RNA biogenesis;K18754	K18754	LIN28	protein lin-28
mito_lo-vs-hi	UPREGULATED	-1.431	1	09182 Protein families: genetic information processing;03021 Transcription machinery;K03129	K03129	TAF4	transcription initiation factor TFIID subunit 4
mito_lo-vs-hi	UPREGULATED	-1.459	0.999	09182 Protein families: genetic information processing;03021 Transcription machinery;K06269	K06269	PPP1C	serine/threonine-protein phosphatase PP1 catalytic subunit [EC:3.1.3.16]
mito_lo-vs-hi	UPREGULATED	-1.158	0.964	09182 Protein families: genetic information processing;03021 Transcription machinery;K11649	K11649	SMARCC	SWI/SNF-related matrix-associated actin-dependent regulator of chromatin subfamily C
mito_lo-vs-hi	UPREGULATED	-1.594	0.998	09182 Protein families: genetic information processing;03029 Mitochondrial biogenesis;K00412	K00412	CYTB,	ubiquinol-cytochrome c reductase cytochrome b subunit
mito_lo-vs-hi	UPREGULATED	-1.816	1	09182 Protein families: genetic information processing;03029 Mitochondrial biogenesis;K02256	K02256	COX1	cytochrome c oxidase subunit 1 [EC:7.1.1.9]
mito_lo-vs-hi	UPREGULATED	-2.06	1	09182 Protein families: genetic information processing;03029 Mitochondrial biogenesis;K02261	K02261	COX2	cytochrome c oxidase subunit 2
mito_lo-vs-hi	UPREGULATED	-1.786	1	09182 Protein families: genetic information processing;03029 Mitochondrial biogenesis;K02262	K02262	COX3	cytochrome c oxidase subunit 3
mito_lo-vs-hi	UPREGULATED	-1.358	0.971	09182 Protein families: genetic information processing;03029 Mitochondrial biogenesis;K02357	K02357	tsf,	elongation factor Ts
mito_lo-vs-hi	UPREGULATED	-1.786	1	09182 Protein families: genetic information processing;03029 Mitochondrial biogenesis;K03882	K03882	ND4L	NADH-ubiquinone oxidoreductase chain 4L [EC:7.1.1.2]
mito_lo-vs-hi	UPREGULATED	-1.312	1	09182 Protein families: genetic information processing;03029 Mitochondrial biogenesis;K08341	K08341	GABARAP,	GABA(A) receptor-associated protein
mito_lo-vs-hi	UPREGULATED	-1.323	0.989	09182 Protein families: genetic information processing;03029 Mitochondrial biogenesis;K12160	K12160	SUMO,	small ubiquitin-related modifier
mito_lo-vs-hi	UPREGULATED	-1.158	1	09182 Protein families: genetic information processing;03029 Mitochondrial biogenesis;K18914	K18914	FDXR	adrenodoxin-NADP+ reductase [EC:1.18.1.6]
mito_lo-vs-hi	UPREGULATED	-1.63	0.999	09182 Protein families: genetic information processing;03032 DNA replication proteins;K03163	K03163	TOP1	DNA topoisomerase I [EC:5.6.2.1]
mito_lo-vs-hi	UPREGULATED	-1.41	0.985	09182 Protein families: genetic information processing;03032 DNA replication proteins;K10755	K10755	RFC2_4	replication factor C subunit 2/4
mito_lo-vs-hi	UPREGULATED	-1.837	1	09182 Protein families: genetic information processing;03032 DNA replication proteins;K11097	K11097	SNRPE,	small nuclear ribonucleoprotein E
mito_lo-vs-hi	UPREGULATED	-1.338	0.972	09182 Protein families: genetic information processing;03032 DNA replication proteins;K11131	K11131	DKC1,	H/ACA ribonucleoprotein complex subunit 4 [EC:5.4.99.-]
mito_lo-vs-hi	UPREGULATED	-1.195	0.994	09182 Protein families: genetic information processing;03036 Chromosome and associated proteins;K01623	K01623	ALDO	fructose-bisphosphate aldolase, class I [EC:4.1.2.13]
mito_lo-vs-hi	UPREGULATED	-1.327	0.981	09182 Protein families: genetic information processing;03036 Chromosome and associated proteins;K02537	K02537	MAD2	mitotic spindle assembly checkpoint protein MAD2
mito_lo-vs-hi	UPREGULATED	-1.431	1	09182 Protein families: genetic information processing;03036 Chromosome and associated proteins;K03129	K03129	TAF4	transcription initiation factor TFIID subunit 4
mito_lo-vs-hi	UPREGULATED	-1.17	0.983	09182 Protein families: genetic information processing;03036 Chromosome and associated proteins;K06674	K06674	SMC2	structural maintenance of chromosome 2
mito_lo-vs-hi	UPREGULATED	-1.41	0.985	09182 Protein families: genetic information processing;03036 Chromosome and associated proteins;K10755	K10755	RFC2_4	replication factor C subunit 2/4
mito_lo-vs-hi	UPREGULATED	-0.861	0.993	09182 Protein families: genetic information processing;03036 Chromosome and associated proteins;K10840	K10840	CETN2	centrin-2
mito_lo-vs-hi	UPREGULATED	-1.389	0.989	09182 Protein families: genetic information processing;03036 Chromosome and associated proteins;K11446	K11446	KDM5,	[histone H3]-trimethyl-L-lysine4 demethylase [EC:1.14.11.67]
mito_lo-vs-hi	UPREGULATED	-1.158	0.964	09182 Protein families: genetic information processing;03036 Chromosome and associated proteins;K11649	K11649	SMARCC	SWI/SNF-related matrix-associated actin-dependent regulator of chromatin subfamily C
mito_lo-vs-hi	UPREGULATED	-0.861	0.993	09182 Protein families: genetic information processing;03036 Chromosome and associated proteins;K16465	K16465	CETN1	centrin-1
mito_lo-vs-hi	UPREGULATED	-1.312	1	09182 Protein families: genetic information processing;03036 Chromosome and associated proteins;K16578	K16578	CLASP1_2	CLIP-associating protein 1/2
mito_lo-vs-hi	UPREGULATED	-1.459	0.999	09182 Protein families: genetic information processing;03041 Spliceosome;K06269	K06269	PPP1C	serine/threonine-protein phosphatase PP1 catalytic subunit [EC:3.1.3.16]
mito_lo-vs-hi	UPREGULATED	-1.837	1	09182 Protein families: genetic information processing;03041 Spliceosome;K11097	K11097	SNRPE,	small nuclear ribonucleoprotein E
mito_lo-vs-hi	UPREGULATED	-1.433	0.998	09182 Protein families: genetic information processing;03041 Spliceosome;K12737	K12737	SDCCAG10	peptidyl-prolyl cis-trans isomerase SDCCAG10 [EC:5.2.1.8]
mito_lo-vs-hi	UPREGULATED	-1.893	1	09182 Protein families: genetic information processing;03041 Spliceosome;K12867	K12867	SYF1,	pre-mRNA-splicing factor SYF1
mito_lo-vs-hi	UPREGULATED	-1.058	0.954	09182 Protein families: genetic information processing;03041 Spliceosome;K13190	K13190	RBM15	RNA-binding protein 15
mito_lo-vs-hi	UPREGULATED	-1.17	0.983	09182 Protein families: genetic information processing;03041 Spliceosome;K20099	K20099	YTHDC2	ATP-dependent RNA helicase YTHDC2 [EC:3.6.4.13]
mito_lo-vs-hi	UPREGULATED	-1.158	0.964	09182 Protein families: genetic information processing;03051 Proteasome;K02730	K02730	PSMA6	20S proteasome subunit alpha 1 [EC:3.4.25.1]
mito_lo-vs-hi	UPREGULATED	-1.164	0.959	09182 Protein families: genetic information processing;03051 Proteasome;K06698	K06698	PSME3	proteasome activator subunit 3 (PA28 gamma)
mito_lo-vs-hi	UPREGULATED	-1.358	0.971	09182 Protein families: genetic information processing;03110 Chaperones and folding catalysts;K02108	K02108	ATPF0A,	F-type H+-transporting ATPase subunit a
mito_lo-vs-hi	UPREGULATED	-1.709	1	09182 Protein families: genetic information processing;03110 Chaperones and folding catalysts;K03671	K03671	trxA	thioredoxin 1
mito_lo-vs-hi	UPREGULATED	-1.406	0.996	09182 Protein families: genetic information processing;03110 Chaperones and folding catalysts;K03676	K03676	grxC,	glutaredoxin 3
mito_lo-vs-hi	UPREGULATED	-1.189	0.983	09182 Protein families: genetic information processing;03110 Chaperones and folding catalysts;K09493	K09493	CCT1,	T-complex protein 1 subunit alpha
mito_lo-vs-hi	UPREGULATED	-1.459	0.999	09182 Protein families: genetic information processing;03110 Chaperones and folding catalysts;K09557	K09557	BAG3	BCL2-associated athanogene 3
mito_lo-vs-hi	UPREGULATED	-1.39	0.995	09182 Protein families: genetic information processing;03110 Chaperones and folding catalysts;K09584	K09584	PDIA6,	protein disulfide-isomerase A6 [EC:5.3.4.1]
mito_lo-vs-hi	UPREGULATED	-1.433	0.998	09182 Protein families: genetic information processing;03110 Chaperones and folding catalysts;K12737	K12737	SDCCAG10	peptidyl-prolyl cis-trans isomerase SDCCAG10 [EC:5.2.1.8]
mito_lo-vs-hi	UPREGULATED	-1.39	0.995	09182 Protein families: genetic information processing;03110 Chaperones and folding catalysts;K13984	K13984	TXNDC5,	thioredoxin domain-containing protein 5 [EC:5.3.4.1]
mito_lo-vs-hi	UPREGULATED	-1.41	0.985	09182 Protein families: genetic information processing;03400 DNA repair and recombination proteins;K10755	K10755	RFC2_4	replication factor C subunit 2/4
mito_lo-vs-hi	UPREGULATED	-0.861	0.993	09182 Protein families: genetic information processing;03400 DNA repair and recombination proteins;K10840	K10840	CETN2	centrin-2
mito_lo-vs-hi	UPREGULATED	-1.195	0.994	09182 Protein families: genetic information processing;03400 DNA repair and recombination proteins;K15423	K15423	PPP4C	serine/threonine-protein phosphatase 4 catalytic subunit [EC:3.1.3.16]
mito_lo-vs-hi	UPREGULATED	-1.433	1	09182 Protein families: genetic information processing;04121 Ubiquitin system;K02983	K02983	RP-S30e,	small subunit ribosomal protein S30e
mito_lo-vs-hi	UPREGULATED	-1.554	1	09182 Protein families: genetic information processing;04121 Ubiquitin system;K06643	K06643	MDM2	E3 ubiquitin-protein ligase Mdm2 [EC:2.3.2.27]
mito_lo-vs-hi	UPREGULATED	-1.312	1	09182 Protein families: genetic information processing;04121 Ubiquitin system;K08341	K08341	GABARAP,	GABA(A) receptor-associated protein
mito_lo-vs-hi	UPREGULATED	-1.292	0.978	09182 Protein families: genetic information processing;04121 Ubiquitin system;K12158	K12158	NEDD8	ubiquitin-like protein Nedd8
mito_lo-vs-hi	UPREGULATED	-1.323	0.989	09182 Protein families: genetic information processing;04121 Ubiquitin system;K12160	K12160	SUMO,	small ubiquitin-related modifier
mito_lo-vs-hi	UPREGULATED	-1.538	0.996	09182 Protein families: genetic information processing;04131 Membrane trafficking;K00940	K00940	ndk,	nucleoside-diphosphate kinase [EC:2.7.4.6]
mito_lo-vs-hi	UPREGULATED	-1.195	0.994	09182 Protein families: genetic information processing;04131 Membrane trafficking;K01623	K01623	ALDO	fructose-bisphosphate aldolase, class I [EC:4.1.2.13]
mito_lo-vs-hi	UPREGULATED	-1.219	0.964	09182 Protein families: genetic information processing;04131 Membrane trafficking;K05756	K05756	ARPC3	actin related protein 2/3 complex, subunit 3
mito_lo-vs-hi	UPREGULATED	-1.389	0.989	09182 Protein families: genetic information processing;04131 Membrane trafficking;K05759	K05759	PFN	profilin
mito_lo-vs-hi	UPREGULATED	-1.735	1	09182 Protein families: genetic information processing;04131 Membrane trafficking;K05765	K05765	CFL	cofilin
mito_lo-vs-hi	UPREGULATED	-1.668	0.999	09182 Protein families: genetic information processing;04131 Membrane trafficking;K06560	K06560	MRC,	mannose receptor, C type
mito_lo-vs-hi	UPREGULATED	-1.554	1	09182 Protein families: genetic information processing;04131 Membrane trafficking;K06643	K06643	MDM2	E3 ubiquitin-protein ligase Mdm2 [EC:2.3.2.27]
mito_lo-vs-hi	UPREGULATED	-1.459	0.999	09182 Protein families: genetic information processing;04131 Membrane trafficking;K07891	K07891	RAB22	Ras-related protein Rab-22
mito_lo-vs-hi	UPREGULATED	-1.583	1	09182 Protein families: genetic information processing;04131 Membrane trafficking;K07908	K07908	RAB15	Ras-related protein Rab-15
mito_lo-vs-hi	UPREGULATED	-1.312	1	09182 Protein families: genetic information processing;04131 Membrane trafficking;K08341	K08341	GABARAP,	GABA(A) receptor-associated protein
mito_lo-vs-hi	UPREGULATED	-1.459	0.999	09182 Protein families: genetic information processing;04131 Membrane trafficking;K09557	K09557	BAG3	BCL2-associated athanogene 3
mito_lo-vs-hi	UPREGULATED	-1.39	0.995	09182 Protein families: genetic information processing;04131 Membrane trafficking;K09584	K09584	PDIA6,	protein disulfide-isomerase A6 [EC:5.3.4.1]
mito_lo-vs-hi	UPREGULATED	-1.458	1	09182 Protein families: genetic information processing;04131 Membrane trafficking;K09586	K09586	ERP29	endoplasmic reticulum protein 29
mito_lo-vs-hi	UPREGULATED	-1.227	0.959	09182 Protein families: genetic information processing;04131 Membrane trafficking;K10365	K10365	CAPZB	F-actin-capping protein subunit beta
mito_lo-vs-hi	UPREGULATED	-1.389	0.989	09182 Protein families: genetic information processing;04131 Membrane trafficking;K12495	K12495	IQSEC	IQ motif and SEC7 domain-containing protein
mito_lo-vs-hi	UPREGULATED	-1.39	0.995	09182 Protein families: genetic information processing;04131 Membrane trafficking;K13984	K13984	TXNDC5,	thioredoxin domain-containing protein 5 [EC:5.3.4.1]
mito_lo-vs-hi	UPREGULATED	-1.433	0.987	09182 Protein families: genetic information processing;04131 Membrane trafficking;K15620	K15620	GOLPH3,	golgi phosphoprotein 3
mito_lo-vs-hi	UPREGULATED	-1.158	0.964	09182 Protein families: genetic information processing;04131 Membrane trafficking;K17697	K17697	DOCK4	dedicator of cytokinesis protein 4
mito_lo-vs-hi	UPREGULATED	-1.334	1	09182 Protein families: genetic information processing;04131 Membrane trafficking;K20068	K20068	REPS	RalBP1-associated Eps domain-containing protein
mito_lo-vs-hi	UPREGULATED	-1.597	0.999	09182 Protein families: genetic information processing;04131 Membrane trafficking;K21442	K21442	ANKRD54	ankyrin repeat domain-containing protein 54
mito_lo-vs-hi	UPREGULATED	-1.04	0.954	09183 Protein families: signaling and cellular processes;02000 Transporters;K00799	K00799	GST,	glutathione S-transferase [EC:2.5.1.18]
mito_lo-vs-hi	UPREGULATED	-1.27	0.981	09183 Protein families: signaling and cellular processes;02000 Transporters;K08994	K08994	yneE,	ion channel-forming bestrophin family protein
mito_lo-vs-hi	UPREGULATED	-1.371	0.989	09183 Protein families: signaling and cellular processes;02000 Transporters;K12385	K12385	NPC1	Niemann-Pick C1 protein
mito_lo-vs-hi	UPREGULATED	-1.567	0.999	09183 Protein families: signaling and cellular processes;02000 Transporters;K13783	K13783	SLC37A1_2	MFS transporter, OPA family, solute carrier family 37 (glycerol-3-phosphate transporter), member 1/2
mito_lo-vs-hi	UPREGULATED	-1.313	0.997	09183 Protein families: signaling and cellular processes;02000 Transporters;K15272	K15272	SLC35A1_2_3	solute carrier family 35 (UDP-sugar transporter), member A1/2/3
mito_lo-vs-hi	UPREGULATED	-1.554	1	09183 Protein families: signaling and cellular processes;02000 Transporters;K15283	K15283	SLC35E1	solute carrier family 35, member E1
mito_lo-vs-hi	UPREGULATED	-1.554	1	09183 Protein families: signaling and cellular processes;02000 Transporters;K15285	K15285	SLC35E3	solute carrier family 35, member E3
mito_lo-vs-hi	UPREGULATED	-1.187	0.959	09183 Protein families: signaling and cellular processes;02000 Transporters;K20989	K20989	DUR3	urea-proton symporter
mito_lo-vs-hi	UPREGULATED	-1.189	0.983	09183 Protein families: signaling and cellular processes;03037 Cilium and associated proteins;K09493	K09493	CCT1,	T-complex protein 1 subunit alpha
mito_lo-vs-hi	UPREGULATED	-1.11	0.996	09183 Protein families: signaling and cellular processes;03037 Cilium and associated proteins;K10418	K10418	DYNLL	dynein light chain LC8-type
mito_lo-vs-hi	UPREGULATED	-1.142	0.98	09183 Protein families: signaling and cellular processes;03037 Cilium and associated proteins;K10420	K10420	DYNLT1_3	dynein light chain Tctex-type 1/3
mito_lo-vs-hi	UPREGULATED	-0.861	0.993	09183 Protein families: signaling and cellular processes;03037 Cilium and associated proteins;K16465	K16465	CETN1	centrin-1
mito_lo-vs-hi	UPREGULATED	-1.158	0.964	09183 Protein families: signaling and cellular processes;03037 Cilium and associated proteins;K17697	K17697	DOCK4	dedicator of cytokinesis protein 4
mito_lo-vs-hi	UPREGULATED	-1.17	0.983	09183 Protein families: signaling and cellular processes;04030 G protein-coupled receptors;K04324	K04324	MAS1L	Mas-related G-protein coupled receptor MRG
mito_lo-vs-hi	UPREGULATED	-1.292	0.978	09183 Protein families: signaling and cellular processes;04031 GTP-binding proteins;K04536	K04536	GNB1	guanine nucleotide-binding protein G(I)/G(S)/G(T) subunit beta-1
mito_lo-vs-hi	UPREGULATED	-1.459	0.999	09183 Protein families: signaling and cellular processes;04031 GTP-binding proteins;K07891	K07891	RAB22	Ras-related protein Rab-22
mito_lo-vs-hi	UPREGULATED	-1.583	1	09183 Protein families: signaling and cellular processes;04031 GTP-binding proteins;K07908	K07908	RAB15	Ras-related protein Rab-15
mito_lo-vs-hi	UPREGULATED	-1.504	0.999	09183 Protein families: signaling and cellular processes;04040 Ion channels;K05389	K05389	KCNKF	potassium channel subfamily K, other eukaryote
mito_lo-vs-hi	UPREGULATED	-1.28	0.994	09183 Protein families: signaling and cellular processes;04050 Cytokine receptors;K05061	K05061	CSF3R,	granulocyte colony-stimulating factor receptor
mito_lo-vs-hi	UPREGULATED	-1.668	0.999	09183 Protein families: signaling and cellular processes;04054 Pattern recognition receptors;K06560	K06560	MRC,	mannose receptor, C type
mito_lo-vs-hi	UPREGULATED	-1.28	0.994	09183 Protein families: signaling and cellular processes;04090 CD molecules;K05061	K05061	CSF3R,	granulocyte colony-stimulating factor receptor
mito_lo-vs-hi	UPREGULATED	-1.668	0.999	09183 Protein families: signaling and cellular processes;04090 CD molecules;K06560	K06560	MRC,	mannose receptor, C type
mito_lo-vs-hi	UPREGULATED	-1.668	0.999	09183 Protein families: signaling and cellular processes;04091 Lectins;K06560	K06560	MRC,	mannose receptor, C type
mito_lo-vs-hi	UPREGULATED	-1.015	0.999	09183 Protein families: signaling and cellular processes;04147 Exosome;K00927	K00927	PGK,	phosphoglycerate kinase [EC:2.7.2.3]
mito_lo-vs-hi	UPREGULATED	-1.047	0.995	09183 Protein families: signaling and cellular processes;04147 Exosome;K01379	K01379	CTSD	cathepsin D [EC:3.4.23.5]
mito_lo-vs-hi	UPREGULATED	-1.195	0.994	09183 Protein families: signaling and cellular processes;04147 Exosome;K01623	K01623	ALDO	fructose-bisphosphate aldolase, class I [EC:4.1.2.13]
mito_lo-vs-hi	UPREGULATED	-1.396	1	09183 Protein families: signaling and cellular processes;04147 Exosome;K01915	K01915	glnA,	glutamine synthetase [EC:6.3.1.2]
mito_lo-vs-hi	UPREGULATED	-1.292	0.978	09183 Protein families: signaling and cellular processes;04147 Exosome;K04536	K04536	GNB1	guanine nucleotide-binding protein G(I)/G(S)/G(T) subunit beta-1
mito_lo-vs-hi	UPREGULATED	-1.389	0.989	09183 Protein families: signaling and cellular processes;04147 Exosome;K05759	K05759	PFN	profilin
mito_lo-vs-hi	UPREGULATED	-1.735	1	09183 Protein families: signaling and cellular processes;04147 Exosome;K05765	K05765	CFL	cofilin
mito_lo-vs-hi	UPREGULATED	-1.164	0.959	09183 Protein families: signaling and cellular processes;04147 Exosome;K06698	K06698	PSME3	proteasome activator subunit 3 (PA28 gamma)
mito_lo-vs-hi	UPREGULATED	-1.583	1	09183 Protein families: signaling and cellular processes;04147 Exosome;K07908	K07908	RAB15	Ras-related protein Rab-15
mito_lo-vs-hi	UPREGULATED	-1.673	1	09183 Protein families: signaling and cellular processes;04147 Exosome;K08767	K08767	ANGPTL4,	angiopoietin-like 4
mito_lo-vs-hi	UPREGULATED	-1.189	0.983	09183 Protein families: signaling and cellular processes;04147 Exosome;K09493	K09493	CCT1,	T-complex protein 1 subunit alpha
mito_lo-vs-hi	UPREGULATED	-1.227	0.959	09183 Protein families: signaling and cellular processes;04147 Exosome;K10365	K10365	CAPZB	F-actin-capping protein subunit beta
mito_lo-vs-hi	UPREGULATED	-1.04	0.954	09183 Protein families: signaling and cellular processes;04147 Exosome;K17284	K17284	PLIN2,	perilipin-2
mito_lo-vs-hi	UPREGULATED	-1.24	0.968	09183 Protein families: signaling and cellular processes;04147 Exosome;K21456	K21456	GSS	glutathione synthase [EC:6.3.2.3]
mito_lo-vs-hi	UPREGULATED	-1.219	0.964	09183 Protein families: signaling and cellular processes;04812 Cytoskeleton proteins;K05756	K05756	ARPC3	actin related protein 2/3 complex, subunit 3
mito_lo-vs-hi	UPREGULATED	-1.389	0.989	09183 Protein families: signaling and cellular processes;04812 Cytoskeleton proteins;K05759	K05759	PFN	profilin
mito_lo-vs-hi	UPREGULATED	-1.735	1	09183 Protein families: signaling and cellular processes;04812 Cytoskeleton proteins;K05765	K05765	CFL	cofilin
mito_lo-vs-hi	UPREGULATED	-1.04	0.954	09183 Protein families: signaling and cellular processes;04812 Cytoskeleton proteins;K07611	K07611	LMNB	lamin B
mito_lo-vs-hi	UPREGULATED	-1.673	1	09183 Protein families: signaling and cellular processes;04812 Cytoskeleton proteins;K07767	K07767	KATNA1	katanin p60 ATPase-containing subunit A1 [EC:5.6.1.1]
mito_lo-vs-hi	UPREGULATED	-1.132	0.975	09183 Protein families: signaling and cellular processes;04812 Cytoskeleton proteins;K08798	K08798	MARK	MAP/microtubule affinity-regulating kinase [EC:2.7.11.1]
mito_lo-vs-hi	UPREGULATED	-1.227	0.959	09183 Protein families: signaling and cellular processes;04812 Cytoskeleton proteins;K10365	K10365	CAPZB	F-actin-capping protein subunit beta
mito_lo-vs-hi	UPREGULATED	-1.312	1	09183 Protein families: signaling and cellular processes;04812 Cytoskeleton proteins;K10367	K10367	FMN1	formin 1
mito_lo-vs-hi	UPREGULATED	-1.338	0.972	09183 Protein families: signaling and cellular processes;04812 Cytoskeleton proteins;K10388	K10388	PLEC	plectin
mito_lo-vs-hi	UPREGULATED	-1.11	0.996	09183 Protein families: signaling and cellular processes;04812 Cytoskeleton proteins;K10418	K10418	DYNLL	dynein light chain LC8-type
mito_lo-vs-hi	UPREGULATED	-1.142	0.98	09183 Protein families: signaling and cellular processes;04812 Cytoskeleton proteins;K10420	K10420	DYNLT1_3	dynein light chain Tctex-type 1/3
mito_lo-vs-hi	UPREGULATED	-1.323	0.989	09183 Protein families: signaling and cellular processes;04812 Cytoskeleton proteins;K12160	K12160	SUMO,	small ubiquitin-related modifier
mito_lo-vs-hi	UPREGULATED	-1.312	1	09183 Protein families: signaling and cellular processes;04812 Cytoskeleton proteins;K16578	K16578	CLASP1_2	CLIP-associating protein 1/2
mito_lo-vs-hi	UPREGULATED	-1.577	1	09191 Unclassified: metabolism;99980 Enzymes with EC numbers;K01181	K01181	E3.2.1.8,	endo-1,4-beta-xylanase [EC:3.2.1.8]
mito_lo-vs-hi	UPREGULATED	-1.083	0.971	09191 Unclassified: metabolism;99980 Enzymes with EC numbers;K01802	K01802	E5.2.1.8	peptidylprolyl isomerase [EC:5.2.1.8]
mito_lo-vs-hi	UPREGULATED	-1.192	0.959	09191 Unclassified: metabolism;99980 Enzymes with EC numbers;K07304	K07304	msrA	peptide-methionine (S)-S-oxide reductase [EC:1.8.4.11]
mito_lo-vs-hi	UPREGULATED	-1.666	1	09191 Unclassified: metabolism;99980 Enzymes with EC numbers;K17893	K17893	AOX1,	ubiquinol oxidase [EC:1.10.3.11]
mito_lo-vs-hi	UPREGULATED	-1.406	0.997	09191 Unclassified: metabolism;99980 Enzymes with EC numbers;K21737	K21737	ACET6,	acyl-lipid Delta6-acetylenase / acyl-lipid (9-3)-desaturase [EC:1.14.19.38 1.14.19.47]
mito_lo-vs-hi	UPREGULATED	-1.207	1	09191 Unclassified: metabolism;99982 Energy metabolism;K03839	K03839	fldA,	flavodoxin I
mito_lo-vs-hi	UPREGULATED	-1.631	1	09193 Unclassified: signaling and cellular processes;99992 Structural proteins;K17338	K17338	REEP1_2_3_4	receptor expression-enhancing protein 1/2/3/4
mito_lo-vs-hi	UPREGULATED	-1.334	1	09193 Unclassified: signaling and cellular processes;99995 Signaling proteins;K18449	K18449	PRUNE2,	prune homolog 2
mito_lo-vs-hi	UPREGULATED	-1.178	0.968	09194 Poorly characterized;99996 General function prediction only;K02715	K02715	psbN	PsbN protein
mito_lo-vs-hi	UPREGULATED	-1.391	0.998	09194 Poorly characterized;99997 Function unknown;K06883	K06883	K06883	uncharacterized protein
mito_lo-vs-hi	DOWNREGULATED	0.949	0.986	09100 Metabolism;09102 Energy metabolism;00195 Photosynthesis;K02691	K02691	psaC	photosystem I subunit VII
mito_lo-vs-hi	DOWNREGULATED	0.992	0.954	09120 Genetic Information Processing;09121 Transcription;03022 Basal transcription factors;K03124	K03124	TFIIB,	transcription initiation factor TFIIB
mito_lo-vs-hi	DOWNREGULATED	0.992	0.954	09120 Genetic Information Processing;09122 Translation;03010 Ribosome;K02973	K02973	RP-S23e,	small subunit ribosomal protein S23e
mito_lo-vs-hi	DOWNREGULATED	0.753	0.999	09120 Genetic Information Processing;09122 Translation;03010 Ribosome;K02977	K02977	RP-S27Ae,	ubiquitin-small subunit ribosomal protein S27Ae
mito_lo-vs-hi	DOWNREGULATED	0.753	0.999	09120 Genetic Information Processing;09123 Folding, sorting and degradation;04120 Ubiquitin mediated proteolysis;K02977	K02977	RP-S27Ae,	ubiquitin-small subunit ribosomal protein S27Ae
mito_lo-vs-hi	DOWNREGULATED	0.753	0.999	09120 Genetic Information Processing;09123 Folding, sorting and degradation;04120 Ubiquitin mediated proteolysis;K08770	K08770	UBC	ubiquitin C
mito_lo-vs-hi	DOWNREGULATED	0.753	0.999	09140 Cellular Processes;09141 Transport and catabolism;04137 Mitophagy - animal;K02977	K02977	RP-S27Ae,	ubiquitin-small subunit ribosomal protein S27Ae
mito_lo-vs-hi	DOWNREGULATED	0.753	0.999	09140 Cellular Processes;09141 Transport and catabolism;04137 Mitophagy - animal;K08770	K08770	UBC	ubiquitin C
mito_lo-vs-hi	DOWNREGULATED	0.753	0.999	09140 Cellular Processes;09141 Transport and catabolism;04140 Autophagy - animal;K02977	K02977	RP-S27Ae,	ubiquitin-small subunit ribosomal protein S27Ae
mito_lo-vs-hi	DOWNREGULATED	0.753	0.999	09140 Cellular Processes;09141 Transport and catabolism;04140 Autophagy - animal;K08770	K08770	UBC	ubiquitin C
mito_lo-vs-hi	DOWNREGULATED	0.949	0.986	09181 Protein families: metabolism;00194 Photosynthesis proteins;K02691	K02691	psaC	photosystem I subunit VII
mito_lo-vs-hi	DOWNREGULATED	0.992	0.954	09182 Protein families: genetic information processing;03011 Ribosome;K02973	K02973	RP-S23e,	small subunit ribosomal protein S23e
mito_lo-vs-hi	DOWNREGULATED	0.753	0.999	09182 Protein families: genetic information processing;03011 Ribosome;K02977	K02977	RP-S27Ae,	ubiquitin-small subunit ribosomal protein S27Ae
mito_lo-vs-hi	DOWNREGULATED	0.992	0.954	09182 Protein families: genetic information processing;03021 Transcription machinery;K03124	K03124	TFIIB,	transcription initiation factor TFIIB
mito_lo-vs-hi	DOWNREGULATED	0.753	0.999	09182 Protein families: genetic information processing;04121 Ubiquitin system;K02977	K02977	RP-S27Ae,	ubiquitin-small subunit ribosomal protein S27Ae
mito_lo-vs-hi	DOWNREGULATED	0.753	0.999	09182 Protein families: genetic information processing;04121 Ubiquitin system;K08770	K08770	UBC	ubiquitin C
mito_lo-vs-hi	DOWNREGULATED	0.753	0.999	09183 Protein families: signaling and cellular processes;04147 Exosome;K02977	K02977	RP-S27Ae,	ubiquitin-small subunit ribosomal protein S27Ae
