# Supplementary material for: Genome-resolved biogeography of Phaeocystales, cosmopolitan bloom-forming algae
Source: Research Square preprint supplement (doi:10.21203/rs.3.rs-4339559/v1), 2024-06-11
Supplement: Supplementary file 7 [file b605045046f8e1c561187838.xlsx]

## Sheet: Family counts
Supplementary Table S7: Transporters in Phaeocystis and other haptophytes. Table shows the A) counts and B) total gene model normalized counts of transporter genes assigned to families (i.e., per 100k genes). Phacord1 shows a higher normalized count of transporter genes than other Phaeocystis. Gene families and substrate classes explained on the third sheet.
substrate class:		I		IA		IC																																							ID
genome \ family:	total genes	CCC	LIC	MscL	MscS	ABC	ACR3	AEC	Amt	BASS	CDF	CPA1	CPA2	CaCA	Ctr	ENaC	F-ATPase	FeoB	GIC	H+-PPase	ILT	IRK-C	KUP	MFS	MIT	MerTP	MgtE	NSCC2	NhaA	NhaC	NhaD	NiCoT	Nramp	P-ATPase	PCC	PPI2	Presenilin	RIR-CaC	TRP-CC	Trk	UBS1	VIC	VIT	ZIP	ABC	AE	ArsAB	ArsB	Bestrophin
A)
Phaant1	37567	4	28	0	2	16	0	3	8	3	13	12	7	23	0	1	36	7	10	3	0	1	0	1	4	9	9	1	1	2	0	2	7	17	2	0	1	1	31	0	0	120	7	15	8	7	1	0	45
Phaglo1	29900	3	30	0	2	12	0	1	19	3	10	6	4	16	2	2	30	6	6	3	2	0	0	1	1	7	6	2	0	0	0	1	4	8	1	0	0	1	18	0	0	95	1	10	6	4	1	0	42
Phacord1	35483	5	29	0	2	13	0	0	14	4	13	19	7	29	1	1	26	7	14	4	0	2	0	4	3	8	7	1	1	2	0	1	4	22	2	0	2	2	49	0	4	164	3	16	7	6	1	1	55
Chrpa1	28185	4	17	0	2	5	1	1	8	1	11	10	7	24	1	0	34	7	1	2	0	2	0	3	4	8	4	1	1	2	0	0	4	20	0	1	1	0	27	2	1	170	3	18	5	2	2	2	28
Chrsp1	16770	3	17	0	2	3	0	0	5	1	6	7	5	23	0	0	23	4	0	1	0	1	0	0	5	9	3	0	0	0	0	0	4	17	1	1	1	0	18	2	1	140	1	7	6	2	0	0	18
Emihu1	33340	5	31	1	5	15	0	0	25	8	16	11	8	22	1	1	34	4	5	6	0	2	3	10	2	9	10	0	3	3	0	4	4	33	0	0	0	0	6	1	3	43	0	24	5	13	3	3	29
Dialut1	13777	0	8	0	3	11	0	0	11	6	11	10	3	20	0	1	24	5	0	1	3	0	1	0	5	6	2	1	1	1	1	2	1	9	1	0	0	1	11	0	1	46	3	7	6	6	1	1	16
Pavlov2436_1	26034	0	2	0	2	8	0	0	9	8	9	11	3	28	2	0	29	4	0	3	5	1	3	0	3	6	1	0	1	1	1	1	1	17	1	0	0	0	5	0	3	32	3	10	3	7	0	2	21
B)
Phaant1		10.6476	74.5335	0	5.32382	42.5906	0	7.98573	21.2953	7.98573	34.6048	31.9429	18.6334	61.2239	0	2.66191	95.8288	18.6334	26.6191	7.98573	0	2.66191	0	2.66191	10.6476	23.9572	23.9572	2.66191	2.66191	5.32382	0	5.32382	18.6334	45.2525	5.32382	0	2.66191	2.66191	82.5192	0	0	319.429	18.6334	39.9287	21.2953	18.6334	2.66191	0	119.786
Phaglo1		10.0334	100.334	0	6.68896	40.1338	0	3.34448	63.5452	10.0334	33.4448	20.0669	13.3779	53.5117	6.68896	6.68896	100.334	20.0669	20.0669	10.0334	6.68896	0	0	3.34448	3.34448	23.4114	20.0669	6.68896	0	0	0	3.34448	13.3779	26.7559	3.34448	0	0	3.34448	60.2007	0	0	317.726	3.34448	33.4448	20.0669	13.3779	3.34448	0	140.468
Phacord1		14.0913	81.7293	0	5.6365	36.6373	0	0	39.4555	11.273	36.6373	53.5468	19.7278	81.7293	2.81825	2.81825	73.2745	19.7278	39.4555	11.273	0	5.6365	0	11.273	8.45475	22.546	19.7278	2.81825	2.81825	5.6365	0	2.81825	11.273	62.0015	5.6365	0	5.6365	5.6365	138.094	0	11.273	462.193	8.45475	45.092	19.7278	16.9095	2.81825	2.81825	155.004
Chrpa1		14.1919	60.3158	0	7.09597	17.7399	3.54799	3.54799	28.3839	3.54799	39.0279	35.4799	24.8359	85.1517	3.54799	0	120.632	24.8359	3.54799	7.09597	0	7.09597	0	10.644	14.1919	28.3839	14.1919	3.54799	3.54799	7.09597	0	0	14.1919	70.9597	0	3.54799	3.54799	0	95.7956	7.09597	3.54799	603.158	10.644	63.8638	17.7399	7.09597	7.09597	7.09597	99.3436
Chrsp1		17.8891	101.371	0	11.9261	17.8891	0	0	29.8151	5.96303	35.7782	41.7412	29.8151	137.15	0	0	137.15	23.8521	0	5.96303	0	5.96303	0	0	29.8151	53.6673	17.8891	0	0	0	0	0	23.8521	101.371	5.96303	5.96303	5.96303	0	107.335	11.9261	5.96303	834.824	5.96303	41.7412	35.7782	11.9261	0	0	107.335
Emihu1		14.997	92.9814	2.9994	14.997	44.991	0	0	74.985	23.9952	47.9904	32.9934	23.9952	65.9868	2.9994	2.9994	101.98	11.9976	14.997	17.9964	0	5.9988	8.9982	29.994	5.9988	26.9946	29.994	0	8.9982	8.9982	0	11.9976	11.9976	98.9802	0	0	0	0	17.9964	2.9994	8.9982	128.974	0	71.9856	14.997	38.9922	8.9982	8.9982	86.9826
Dialut1		0	58.0678	0	21.7754	79.8432	0	0	79.8432	43.5508	79.8432	72.5847	21.7754	145.169	0	7.25847	174.203	36.2924	0	7.25847	21.7754	0	7.25847	0	36.2924	43.5508	14.5169	7.25847	7.25847	7.25847	7.25847	14.5169	7.25847	65.3263	7.25847	0	0	7.25847	79.8432	0	7.25847	333.89	21.7754	50.8093	43.5508	43.5508	7.25847	7.25847	116.136
Pavlov2436_1		0	7.68226	0	7.68226	30.729	0	0	34.5702	30.729	34.5702	42.2524	11.5234	107.552	7.68226	0	111.393	15.3645	0	11.5234	19.2057	3.84113	11.5234	0	11.5234	23.0468	3.84113	0	3.84113	3.84113	3.84113	3.84113	3.84113	65.2992	3.84113	0	0	0	19.2057	0	11.5234	122.916	11.5234	38.4113	11.5234	26.8879	0	7.68226	80.6637
t-test(phaeocystis,other)		0.309412	0.144127	0.18695	0.0319265	0.450314	0.18695	0.157498	0.324774	0.0970952	0.105847	0.230901	0.101592	0.0247257	0.449631	0.172094	0.020886	0.260056	0.0142168	0.468027	0.162656	0.212249	0.0393932	0.363952	0.0532391	0.0554823	0.148501	0.186296	0.0811693	0.248093	0.10187	0.255088	0.303857	0.0230304	0.224004	0.0978355	0.346141	0.102708	0.18669	0.0632023	0.216871	0.402375	0.489304	0.0534528	0.264146	0.132731	0.211794	0.014875	0.0167424
		TRUE	TRUE	FALSE	FALSE	TRUE	FALSE	TRUE	FALSE	FALSE	FALSE	FALSE	FALSE	FALSE	TRUE	TRUE	FALSE	FALSE	TRUE	FALSE	FALSE	FALSE	FALSE	FALSE	FALSE	FALSE	TRUE	TRUE	FALSE	FALSE	FALSE	FALSE	TRUE	FALSE	TRUE	FALSE	TRUE	TRUE	TRUE	FALSE	FALSE	FALSE	TRUE	FALSE	FALSE	FALSE	FALSE	FALSE	TRUE
[truncated: 109 more columns]

## Sheet: Substrate Class counts
Supplementary Table S7, continued. Table shows the A) counts and B) total gene model normalized counts of transporter genes assigned to substrate classes (i.e., transporter genes per 100k genes). The I2O ratio shows the ratio between inorganic (anion+cation) and organic (sugar+amino acid) transporters. The lower I2O ratio in Phacord1 compared to other Phaeocystis, particularly Phaant1, is apparen…
genome \ substrate class:	total genes	I	IA	IC	ID	II	III	IV	V	VI	VIII	other		Total	I2O ratio*	H-ind
A)
Phaant1	37567	32	2	373	116	152	88	55	18	361	15	173		1385	2.0375	-26.3975
Phaglo1	29900	33	2	278	90	127	81	41	16	286	9	128		1091	1.76923	-21.4931
Phacord1	35483	34	2	449	130	161	111	55	21	382	13	196		1554	2.12868	-15.9138
Chrpa1	28185	21	2	385	88	103	94	37	15	278	16	156		1195	2.40102	-9.84402
Chrsp1	16770	20	2	289	56	72	60	29	12	185	8	110		843	2.61364	-9.87119
Emihu1	33340	36	6	316	117	153	160	69	23	505	13	179		1577	1.38339	-19.1357
Dialut1	13777	8	3	206	74	53	42	23	15	208	5	132		769	2.94737	-38.3192
Pavlov2436_1	26034	2	2	209	75	59	41	24	16	220	16	110		774	2.84	-41.7419
B)
Phaant1		85.1811	5.32382	992.893	308.782	404.61	234.248	146.405	47.9144	960.95	39.9287	460.511		3686.75		-26.3975
Phaglo1		110.368	6.68896	929.766	301.003	424.749	270.903	137.124	53.5117	956.522	30.1003	428.094		3648.83		-21.4931
Phacord1		95.8205	5.6365	1265.39	366.373	453.738	312.826	155.004	59.1833	1076.57	36.6373	552.377		4379.56		-15.9138
Chrpa1		74.5077	7.09597	1365.97	312.223	365.443	333.511	131.276	53.2198	986.34	56.7678	553.486		4239.84		-9.84402
Chrsp1		119.261	11.9261	1723.32	333.93	429.338	357.782	172.928	71.5564	1103.16	47.7042	655.933		5026.83		-9.87119
Emihu1		107.978	17.9964	947.81	350.93	458.908	479.904	206.959	68.9862	1514.7	38.9922	536.893		4730.05		-19.1357
Dialut1		58.0678	21.7754	1495.25	537.127	384.699	304.856	166.945	108.877	1509.76	36.2924	958.119		5581.77		-38.3192
Pavlov2436_1		7.68226	7.68226	802.796	288.085	226.627	157.486	92.1871	61.4581	845.049	61.4581	422.524		2973.04		-41.7419
t-test(phaeocystis,other)		0.157184	0.0305264	0.173498	0.229332	0.128001	0.190283	0.357365	0.0581885	0.118317	0.0338108	0.0992562
*I2O - inorganic to organic compound transporter ratio (classes IC+D / II+III)

## Sheet: substrate classes
Designation	Substrate category
I	Choline uptake
IA	Annexin - mechanosensitive ion transporter
IB	Water
IC	Cations
ID	Anions
II	Carbohydrates/sugars
III	Amino acids/proteins
IV	Nucleotides
V	Vitamins/cofactors
VI	Antimicrobials/lipids – hydrophobic compounds
VIII	Other/Unknown
Family	Substrate(s)
2B Viroporin
AAA	ADP:ATP antiporter
AAAP	amino acid
AAAP	tryptophan/tyrosine
AAE	aspartate:alanine antiporter
ABC	?
ABC	? (Fe-S assembly/SufBCD system)
ABC	? (Fe-S cluster assembly/ATM1 precusor)
ABC	? (Uup homolog/duplicated ATPase)
ABC	amino acid (glutamine/glutamate/aspartate?)
ABC	ammonium
ABC	branched-chain amino acid
ABC	cobalamin
ABC	cobalamin/Fe3+-siderophores
ABC	cobalt
ABC	cobalt ion
ABC	CydC/CydD homolog
ABC	D-methionine
ABC	daunorubicin
ABC	dipeptide/oligopeptide
ABC	glutamate gated ion channel
ABC	glycine betaine
ABC	glycine betaine/L-proline
ABC	heme
ABC	heme export
ABC	iron-hydroxamate
ABC	leucine/valine
ABC	lipid A
ABC	lipoprotein
ABC	manganese/zinc ion
ABC	mitochondrial peptide export (ABCB/TAP)
ABC	molybdate
ABC	multidrug
ABC	multidrug (ABCG/PDR-type)
ABC	multidrug?
ABC	nickel
ABC	nitrate
ABC	nitrate/sulfonate/taurine
ABC	oligopeptide
ABC	phosphate
ABC	phosphonate
ABC	phosphonates
ABC	polyamine
ABC	polysaccharide export
ABC	protease secretion
ABC	ribose
ABC	spermidine/putrescine
ABC	sugar
ABC	sugar (maltose?)
ABC	sugar (ribose?)
ABC	sulfate
ABC	taurine
ABC	thiamine
ABC	toluene tolerance
ABC	toxin secretion
ABC	tungsten
ABC	urea
ABC	White pigment protein homolog (ABCG)
ABC	zinc
ABC	zinc ion
AbgT	aminobenzoyl-glutamate
ACC
ACR3	sodium ion/?
AE	chloride/bicarbonate anion exchange
AEC
AEC	multidrug/solvent efflux (MmpL homolog/HAE2 subfamily)
AEC	sodium ion/?
AI-2E	Autoinducer-2 export
Amt	ammonium
Annexin
APC	amino acid
APC	arginine:ornithine antiporter
APC	cationic amino acid
APC	ethanolamine
APC	large neutral amino acid
APC	tryptophan/tyrosine
ArAE	fusaric acid efflux?
ArsAB	arsenite (ArsA)
ArsB	arsenite (ArsB)
BASS
BASS	sodium ion:bile acid symporter
BASS	sodium ion/?
BCCT	glycine betaine/carnitine/choline
BenE	benzoate
Bestrophin	Bestrophin anion channel
Bestrophin	glycine betaine
Bestrophin	glycine betaine/L-proline
Bestrophin	mannose/fructose
BUT	biotin uptake
CaCA	proton:calcium ion antiporter
CaCA	sodium ion:calcium ion antiporter
CaCA	sodium ion:calcium ion+potassium ion antiporter
CCC	potassium ion:chloride ion symporter
CDF	cation efflux
CEPT
CHR	chromate ion
ClC	chloride ion channel
CNT	sodium ion:nucleoside symporter
CPA1	sodium ion:proton antiporter
CPA2	potassium/sodium ion:proton antiporter
CRAC-C
CTL
Ctr	copper ion uptake
DAACS	proton/sodium ion:glutamate/aspartate symporter
DASS	sodium ion:anion symporter
DASS	sodium ion:dicarboxylate/sulfate
DMT
DMT	drug/metabolite?
DMT	glucose uptake (GRP subfamily)
DMT	multidrug efflux (SMR subfamily)
DMT	multidrug efflux (SMR)
DMT	multidrug/quaternary ammonium compound efflux (SMR subfamily)
DMT	nucleotide-sugar
DMT	phosphate:phosphoenolpyruvate translocator
DMT	phosphate/phosphoenolpyruvate
DMT	UDP-galactose:UMP antiporter
DNA-T
ENaC	sodium ion channel
ENT	nucleoside
ESS	sodium ion:glutamate symporter
F-ATPase	protons
FBT	folate/biopterin
FBT	multidrug efflux
FBT	sugar
FeoB	ferrous ion
FNT	formate/nitrite
GIC	amino acid (glutamine/glutamate/aspartate?)
GIC	glutamate gated ion channel
GntP	gluconate
GPH	multidrug efflux
GPH	multidrug efflux?
GPH	proton/sodium ion:sugar symporter
GPH	sugar
GPH	tetracycline efflux?
GPTS
GUP	glycerol:proton symporter
H+-PPase	proton (vacuolar)
HAAAP	amino acid
HAAAP	tryptophan/tyrosine
HCC	heavy metal ion
HCC	hemolysin C (HlyC) homolog
ICln	nucleotide-sensitive anion channel
IIISP
ILT	iron ion
IRK-C	ATP-sensitive inward rectifier potassium ion channel
IVSP
KUP	potassium ion uptake
LCT
LctP	L-lactate
LIC
LIC	drug/metabolite?
LIC	multidrug
LIC	ribose
LIV-E	branched-chain amino acid efflux (AzlC)
LIVCS	branched-chain amino acid
MC
MerTP	mercuric ion
MFS	4-hydroxyphenylacetate
MFS	Acetyl-CoA:CoA antiporter
MFS	cell division
MFS	cyanate
MFS	D-galactonate
MFS	glycerol-3-phosphate
MFS	metabolite (benzoate?)
MFS	monocarboxylate
MFS	multidrug efflux
MFS	multidrug efflux (Bcr/CflA subfamily)
MFS	multidrug efflux?
MFS	multidrug/quaternary ammonium compound efflux (SMR subfamily)
MFS	nitrate
MFS	nitrate/nitrite
MFS	organic cation
MFS	oxalate:formate antiporter
MFS	phosphate
MFS	sodium ion:phosphate symporter
MFS	sugar
MFS	sugar efflux?
MFS	tellurium ion efflux
MFS	tetracycline efflux?
MgtE	hemolysin C (HlyC) homolog
MgtE	magnesium ion
MIP	glycerol uptake
MIT	magnesium/cobalt ion
MMgT
MOP	multidrug efflux
MOP	polysaccharide export
MOP	virulence factor MviN
Mot/Exb
MPP
MPT
MPT	inner membrane translocase (import) Tim10
MPT	inner membrane translocase (import) Tim17
MscL	large-conductance mechanosensitive ion channel
MscS	small-conductance mechanosensitive ion channel
MTB
MTC	tricarboxylates
NCS1	cytosine/purines/uracil/thiamine/allantoin
NCS2	xanthine/uracil
NhaA	sodium ion:proton antiporter
NhaC	sodium ion:proton antiporter
NhaD	sodium ion:proton antiporter
NiCoT	nickel ion
Nramp	manganese/iron ion
NSCC2	preprotein translocase Sec62
NSCC2	protein translocase Sec62 homolog
NSS	sodium ion:solute symporter
OAT	multidrug efflux
OOP
OPT	oligopeptide
Oxa1	60 KD inner membrane protein OxaA homolog
P-ATPase
P-ATPase	cadmium ion
P-ATPase	calcium ion
P-ATPase	calcium ion/manganese ion
P-ATPase	copper ion
P-ATPase	phospholipid
P-ATPase	plasma proton
P-ATPase	sodium ion:potassium ion antiporter
P-ATPase	spermidine/putrescine
P-ATPase	zinc/cadmium/cobalt ion
PCC
PCC	multidrug
PCC	multidrug/exoprotein? (EcsBA homolog)
PCC	potassium ion
PCC	potassium ion channel
PCC	transient receptor potential calcium ion channel
Pho1
PiT	phosphate
PNaS	sodium ion:phosphate symporter
POT	multidrug efflux
POT	proton:dipeptide/tripeptide symporter
PPI2	lead uptake
Presenilin
Presenilin	archaeal calcium ion channel (Presenilin homolog)
PUP	peptide uptake
Pyocin R2	phage P2 tail fiber protein
RFC
RFC	multidrug efflux
RhtB	amino acid efflux
RIR-CaC	calcium ion channel
RND	cobalt/zinc/cadmium ion efflux (HME subfamily)
RND	multidrug efflux
RND	multidrug/solvent efflux (HAE1 subfamily)
RND	multidrug/solvent efflux (HAE3 subfamily)
RND	multidrug/solvent efflux (MmpL homolog/HAE2 subfamily)
RND	Patched (Ptc) segmentation polarity protein homolog
RND	protein export (SecDF)
SSPTS	cellobiose
SSPTS	mannose/fructose
SSS	sodium ion:proline symporter
SulP	sulfate
Tat	protein export
TDT	tellurite
TerC	tellurium ion efflux
ThrE
TRAP-T	C4-dicarboxylate
TRIC
Trk	potassium ion uptake
TRP-CC
TRP-CC	D-galactose/galactoside
TRP-CC	potassium ion channel
TRP-CC	sugar
TRP-CC	transient receptor potential calcium ion channel
UBS1
UBS1	sodium ion/?
UT	urea
VIC
VIC	glycine betaine/L-proline
VIC	hemolysin C (HlyC) homolog
VIC	multidrug efflux
VIC	multidrug/exoprotein? (EcsBA homolog)
VIC	potassium ion channel
VIC	transient receptor potential calcium ion channel
VIT
VIT	vacuolar iron uptake transporter homolog
YggT	?
YhaG	tryptophan uptake
ZIP	zinc ion
