# Supplementary material for: Genome-resolved biogeography of Phaeocystales, cosmopolitan bloom-forming algae
Source: Research Square preprint supplement (doi:10.21203/rs.3.rs-4339559/v1), 2024-06-11
Supplement: Supplementary file 8 [file c7d28ab69a04c4ebb215c565.xlsx]

## Sheet: Supplementary Table S2
Supplementary Table S2: Repetitive element profile of Phaeocystis spp. reference genomes (nuclear assemblies). Data determined using REPET v.3, RepeatMasker, Tandem Repeats Finder, and DUST (below). Homology search based on protein structures detected a recombinase domain in ORFs in a few unclassified repeats and they were considered putative mobile elements referred to as “PutMobRec”.
Class	Type	Sub-type	Phaglo1 (bp)	% of nuc	Phaant1 (bp)	% of nuc	Phacord (bp)	% of nuc
Class 1	LTR retrotransposon	Copia	1851868	0.0118829	1155183	0.0058068	0	0
		Gypsy	38627	0.000247857	485643	0.0024412	0	0
		TRIM/LARD	1145692	0.00735155	12009843	0.0603704	31515	0.000363312
		DIRS	454823	0.00291846	948243	0.00476657	0	0
		BEL	12895	8.27432e-05	0	0	0	0
	Non-LTR retrotransposon	LINE	2259359	0.0144976	1988499	0.00999567	0	0
		SINE	14297	9.17394e-05	35657	0.000179238	0	0
	Penelope	Penelope	28642	0.000183787	0	0	0	0
	Putative_retrotransposon	Putative_RT	146509	0.000940103	20913	0.000105124	7336	8.45711e-05
Class 2	DNA	DNA	159784	0.00102528	822030	0.00413213	0	0
	TIR	TIR	13512193	0.0867035	14634584	0.0735642	286900	0.00330745
	Helitron	Helitron	0	0	412007	0.00207105	0	0
Unknown	PutMobRec	PutMobRec	1479033	0.00949049	448603	0.00225501	0	0
Confused	Confused	Domain conflict	847908	0.00544076	499524	0.00251098	5660424	0.0652546
Unclassified	Unclassified	Unclassified	29455438	0.189006	50731776	0.255015	0	0
Host gene	Host gene	Host gene domain	3753049	0.0240821	17342441	0.0871759	1186868	0.0136825
Tandem repeats$	Tandem repeats		8742	5.60947e-05	45287	0.000227646	850709	0.00980716
Total			55160117	0.353945	101534946	0.51039	8023752	0.0924996
Nuclear assembly size			155843642		198936094		86743622
Tandem repeats and low complexity by:		parameters	Phaglo1	Phaant1	Phacord1
DUST		20	0.2056	0.1373	0.1016
RepeatMasker		default	0.202827	0.141415	0.0802809
Tandem Repeat Finder	TRF stringent	2 10 10 80 10 24 2000	0.2615	0.2077	0.1
	TRF relaxed	2 3 5 80 10 20 2000	0.4943	0.4326	0.3954
$REPET not suitable for tandem repeat estimation - masks tandem repeats prior analysis
