# Supplementary material for: Genome-resolved biogeography of Phaeocystales, cosmopolitan bloom-forming algae
Source: Research Square preprint supplement (doi:10.21203/rs.3.rs-4339559/v1), 2024-06-11
Supplement: Supplementary file 9 [file ca0449fd479aa91e98c63241.xlsx]

## Sheet: Supplementary Table S1
Supplementary Table S1: Genome assembly characteristics of Phaeocystis spp. presented in this work. Reference-quality assemblies are shown with colored background, in colors corresponding to figures. Assembly statistics of a previously assembled Emiliania (Gephyrocapsa) huxleyi are shown for comparison. On the second sheet, basic completeness statistics are shown for MAGs from Delmont et al., 202…
Species, strain, assembly ID	Emilania huxleyi CCMP1516	P.globosa CCMP1524	P.globosa CCMP1528	P.globosa CCMP2710	P.globosa CCMP627	P.globosa CCMP628	P.globosa CCMP629	P.globosa CCMP2754	P.globosa CCMP1805	P.globosa Pg-G(A)	P.antarctica CCMP1374	P.rex CCMP2000	P.cordata CCMP3104	P.jahnii CCMP2496
	Emihu1	GBNOY	GBNOZ	GBNPH	GBNPP	GBNPS	GBNPT	GBNPN	GBNPA	Phaglo1	Phaant1	GBNPB	Phacord1	GCBAO
technology		short reads	short reads	short reads	short reads	short reads	short reads	short reads	short reads	short+PACBIO	short+PACBIO	short reads	short reads	short reads
Sequenced reads		191955901	118529984	159968019	170260392	156830965	175562554	199661184	223583830	717278218	637172119	98847846	232009268	194675730
Sequenced bases		28822204602	17797612983	23999740139	25554147315	23574344673	26371406056	29987245554	33524355464	128138139338	133958160406	14813875064	34878932600	29321527340
Coverage+		42.31	25.89	35.62	37.7	16.84	39.05	57.09	56.12	see Methods	see Methods	15.01	39.79	40.24
# contigs	7809	39172	39870	36675	34408	34989	36850	14854	25764	3182	375	46693	6419	48951
Est. genome size [Mbp]		216.021	236.97	230.47	219.538	208.422	237.058	140.537	163.906	247.838	186.989	505.055	81.8837	320.06
Sequenced length	167861012	141838632	139323495	143081016	137791476	128432992	140731861	105649752	111385349	155975881	199073031	179384885	86876152	160177556
- nuclear	167727055	141705463	139190325	142949439	137660069	128301464	140600458	105516140	111253502	155843642	198936094	179250765	86743622	160034837
- plastid	105297	109118	109119	107292	107919	107919	107920	108100	107461	107461	105512	110249	106720	108121
- mitochondria	28660	24051	24051	24285	23488	23609	23483	25512	24386	24778	31425	23871	25810	34598
GC (%)	61.09	65.29	65.3	65.29	65.36	65.41	65.33	65.8	64.77	64.58	64.39	62.36	68.97	68.37
N50	404808	5197	4906	5896	6082	5126	5657	11256	6040	358336	1556472	5220	31538	4298
+calculated as average coverage for chromosomal contigs after length filtering and decontamination
Completeness [%]
BUSCO v5 odb10&	71	69.4	71	67.9	72.9	70.6	69	77.2	71.4	74.5	84.7	74.9	87	78.5
- complete single-copy	40	39.2	42.4	41.6	46.3	43.9	41.6	63.1	51	61.2	70.2	54.5	78.4	67.5
- complete duplicated	14.5	3.9	3.5	2	2.7	2	3.1	0.4	0	0.4	6.7	0	0.4	0.4
- fragmented	16.5	26.3	25.1	24.3	23.9	24.7	24.3	13.7	20.4	12.9	7.8	20.4	8.2	10.6
- missing	29	30.6	29	32.1	27.1	29.4	31	22.8	28.6	25.5	15.3	25.1	13	21.5
CEGMA	56.85	54.44	60.48	62.5	66.53	66.13	58.47	77.82	73.79	84.27	87.9	17.34	88.31	80.24
TBLASTN Phaant$		26430	26471	26611	26417	26328	26444	26442	25666	30021	37754	23923	21338	19684
TBLASTN Phaglo$		26685	26725	26835	26682	26658	26763	26679	28492	30228	26991	22213	20289	18654
&BUSCO statistics including duplicated and fragmented conserved single-copy queries
$Approximate completeness of the genome assemblies according to the number of TBLASTN hits of the reference proteomes Phaant1 and Phaglo1 that had better bitscore than the best hit from the Haptophyceae protein database
Repetitiveness
Simple repeats	9412982	32713667	31388228	31345686	30714414	26762714	31823368	20151780	26409421	29080292	26161900	11259933	6285409	10655776
Low complexity	765306	2824771	2776991	2755566	2615378	2389093	2738976	1757871	2358578	2404792	1780291	1170711	662321	584672
Satellites	4523	187058	179636	175306	179118	149335	182710	119064	159393	107018	33769	15338	482	1878
Small RNA	110755	15042	14416	11707	11298	13963	13716	8164	9874	17267	156547	12451	15645	13933
RepeatMasker Dfam and RepBase databases from 27/01/2017

## Sheet: MAGs
Supplementary Table S1, continued. Completeness statistics for MAGs from Delmont et al., 2022 (doi: 10.1016/j.xgen.2022.100123). Their inclusion in downstream analyses, i.e. biogeography mapping and tree inference, are indicated.
ID	MAG length	BUSCO	CEGMA	TBLASTN Phaant1	TBLASTN Phaglo1	17-gene	phylogeny clade	phylogeny note	Tara mapping	BEAST	note
TARA_PSW_86_MAG_00284	44935796	29	28.23	17194	17327	y	antarctica/globosa/pouchetii	P.globosa	y	n
TARA_PON_109_MAG_00250	26207734	28.6	27.02	14957	15591	y	antarctica/globosa/pouchetii	P.globosa	n	y
TARA_PSE_93_MAG_00226	21492157	27.9	25	13453	14047	y	antarctica/globosa/pouchetii	P.globosa	n	n
TARA_AON_82_MAG_00318	17192713	16.1	18.55	11000	11475	y	-	P.pouchetii?+P.globosa	n	n	chimeric MAG
TARA_ION_45_MAG_00169	11116051	12.9	16.94	9396	9742	y	antarctica/globosa/pouchetii	P.globosa	n	n
TARA_AOS_82_MAG_00154	11831798	9.8	11.29	9096	8804	y	antarctica/globosa/pouchetii	unsure	n	n
TARA_IOS_50_MAG_00142	11297768	14.5	14.52	8898	9396	y	antarctica/globosa/pouchetii	P.globosa	n	n
TARA_ARC_108_MAG_00319	54354869	56.9	61.29	22231	19951	y	antarctica/globosa/pouchetii	P.cf.pouchetii	y	y
TARA_SOC_28_MAG_00057	32137449	26.7	23.39	18753	13170	y	antarctica/globosa/pouchetii	P.antarctica	y	y
TARA_ASW_2018_MAG_00036	15773077	22.3	27.82	12464	10677	y	antarctica/globosa/pouchetii	P.sp1 (sister to Pg/Pa)	n	y
TARA_SOC_28_MAG_00059	22040728	16.1	10.48	13835	11890	y	antarctica/globosa/pouchetii	P.sp1 (sister to Pg/Pa)	n	n
TARA_AOS_82_MAG_00183	41217481	47.5	53.63	20845	18377	y	antarctica/globosa/pouchetii	P.sp1 (sister to Pg/Pa)	y	y
TARA_AOS_82_MAG_00182	19027317	5.9	4.03	11933	8694	n	-	-	n	n	no phylogenetic data
TARA_SOC_28_MAG_00064	10180036	10.6	9.27	8250	6762	y	N/A	P.sp2	n	n
TARA_SOC_28_MAG_00067	28332040	9.8	10.08	11776	10333	y	N/A	P.sp2	y	n
TARA_SOC_28_MAG_00074	41048232	52.6	51.21	19544	12694	y	N/A	P.sp3	y	y
TARA_AON_82_MAG_00337	52299828	46.7	48.79	15802	15090	y	cordata	P.cordata	y	y
TARA_MED_95_MAG_00492	35342315	45.5	45.97	14315	13443	y	cordata	P.cordata	y	y
TARA_MED_95_MAG_00438	14714430	15.3	16.94	7733	7459	y	cordata	P.cordata sister	y	n
TARA_ARC_108_MAG_00268	15967611	9.4	9.68	6618	6522	y	cordata	P.sp4	n	n
TARA_MED_95_MAG_00453	47885339	42.3	41.53	13217	12562	y	jahnii	P.sp5 (Pjah)	y	y
TARA_ION_45_MAG_00154	27362640	38	41.13	10352	9935	y	jahnii	P.sp6 (Pjah)	y	y
TARA_PSW_86_MAG_00279	30467575	29	29.44	9864	9377	y	-	P.sp5+P.sp6 (Pjah)	n	n	chimeric MAG
TARA_MED_95_MAG_00403	42944356	38	52.02	12365	11801	y	jahnii	P.sp7 cluster (Pjah)	y	y
TARA_SOC_28_MAG_00056	32132466	45.9	47.58	11492	10786	y	jahnii	P.sp7 cluster (Pjah)	y	y
TARA_ARC_108_MAG_00248	51554084	51.4	57.26	14299	13724	y	jahnii	P.sp7 cluster (Pjah)	y	y
TARA_ION_45_MAG_00168	37477256	49	53.23	12685	12145	y	jahnii	P.sp7 cluster (Pjah)	y	y
TARA_AON_82_MAG_00299	10636175	18.4	13.31	4502	4255	y	PSC	PSC2	y	y
TARA_AOS_82_MAG_00142	18832268	45.4	46.37	7228	6835	y	PSC	PSC1	n	n
TARA_ION_45_MAG_00152	22946329	43.6	45.97	7463	7215	y	PSC	PSC1	y	n
TARA_IOS_50_MAG_00134	18396151	39.2	43.55	6987	6718	y	PSC	PSC1	n	n
TARA_MED_95_MAG_00439	18863971	48.3	49.19	7077	6694	y	PSC	PSC1	y	y
TARA_PON_109_MAG_00231	21890082	51.8	52.42	7587	7302	y	PSC	PSC1	y	y
TARA_PSE_93_MAG_00224	15365934	39.2	39.11	6277	6041	y	PSC	PSC1	n	n
TARA_PSW_86_MAG_00287	24583961	55.7	62.9	8241	7892	y	PSC	PSC1	y	y
TARA_RED_19_MAG_00042	19232859	36.5	36.69	7097	6828	y	PSC	PSC1	y	n
TARA_MED_95_MAG_00515	-	-	-	10112	9595	y	-	not Phaeocystales	n	n
