# Supplementary material for: Genome-resolved biogeography of Phaeocystales, cosmopolitan bloom-forming algae
Source: Research Square preprint supplement (doi:10.21203/rs.3.rs-4339559/v1), 2024-06-11
Supplement: Supplementary file 10 [file ed88b6db4eaf3ed4e2e37ca1.xlsx]

## Sheet: Supplementary Table S8
Supplementary Table S8: Gene family evolution in Phaeocystales. Protein families found expanded (gain) or contracted (loss) by the evolution-informed maximum likelihood algorithm CAFE v4.0. Gains or losses per node were inferred based on terminal branch counts and their genetic distances from a multi-gene phylogeny constructed by PhyloFisher. KO groups were automatically or manually inferred from…
node #	node name	gain/loss	InterPro	KO group	Annotation	gains/losses per node	total genes in Phaant1	total genes in Phaglo1	total genes in Phacord1	total genes in PSC
22	Phaant1	gain	IPR004088	A	K Homology domain, type 1	4	33	24	36	20
22	Phaant1	gain	IPR013584	A	RAP domain	6	21	11	15	5
22	Phaant1	gain	IPR045100	A	TUTase nucleotidyltransferase domain	9	12	1	3	3
22	Phaant1	gain	IPR025476	B	Helitron helicase-like domain	4	6	2	0	1
22	Phaant1	gain	IPR001425	C	Archaeal/bacterial/fungal rhodopsins	5	16	7	14	2
22	Phaant1	gain	IPR001433	C	Oxidoreductase FAD/NAD(P)-binding	6	26	15	21	18
22	Phaant1	gain	IPR002109	C	Glutaredoxin	4	27	19	25	11
22	Phaant1	gain	IPR002938	C	FAD-binding domain	16	41	13	24	11
22	Phaant1	gain	IPR006094	C	FAD linked oxidase, N-terminal	8	23	14	9	15
22	Phaant1	gain	IPR008333	C	Flavoprotein pyridine nucleotide cytochrome reductase-like, FAD-binding domain	8	20	9	11	10
22	Phaant1	gain	IPR009056	C	Cytochrome c-like domain	4	13	6	10	7
22	Phaant1	gain	IPR012336	C	Thioredoxin-like fold	3	16	8	15	5
22	Phaant1	gain	IPR013121	C	Ferric reductase, NAD binding domain	2	7	4	4	11
22	Phaant1	gain	IPR016040	C	NAD(P)-binding domain	13	50	33	31	32
22	Phaant1	gain	IPR016166	C	FAD-binding domain, PCMH-type	8	24	14	12	15
22	Phaant1	gain	IPR017927	C	FAD-binding domain, ferredoxin reductase-type	4	27	18	23	24
22	Phaant1	gain	IPR004367	D	Cyclin, C-terminal domain	11	23	10	10	7
22	Phaant1	gain	IPR006671	D	Cyclin, N-terminal	4	33	27	27	22
22	Phaant1	gain	IPR039361	D	Cyclin	10	23	12	9	8
22	Phaant1	gain	IPR001926	E	Tryptophan synthase beta chain-like, PALP domain	6	29	18	22	22
22	Phaant1	gain	IPR004839	E	Aminotransferase, class I/classII	4	30	20	29	23
22	Phaant1	gain	IPR001910	F	Inosine/uridine-preferring nucleoside hydrolase domain	7	19	7	13	5
22	Phaant1	gain	IPR023186	F	Inosine/uridine-preferring nucleoside hydrolase	11	15	2	4	2
22	Phaant1	gain	IPR001223	G	Glycoside hydrolase family 18, catalytic domain	3	19	14	20	8
22	Phaant1	gain	IPR001296	G	Glycosyl transferase, family 1	5	18	10	13	18
22	Phaant1	gain	IPR001765	G	Carbonic anhydrase	2	3	0	0	0
22	Phaant1	gain	IPR003337	G	Trehalose-phosphatase	4	11	4	7	13
22	Phaant1	gain	IPR004853	G	Sugar phosphate transporter domain	7	72	58	69	54
22	Phaant1	gain	IPR005828	G	Major facilitator, sugar transporter-like	4	38	29	37	38
22	Phaant1	gain	IPR007271	G	Nucleotide-sugar transporter	6	42	32	37	22
22	Phaant1	gain	IPR007345	G	Polysaccharide pyruvyl transferase	4	7	3	1	4
22	Phaant1	gain	IPR023561	G	Carbonic anhydrase, alpha-class	2	4	2	1	0
22	Phaant1	gain	IPR040703	G	Limiting CO2-inducible protein B/C, beta carbonyic anhydrase domain	5	6	1	1	0
22	Phaant1	gain	IPR006043	H	Xanthine/uracil/vitamin C permease	2	4	0	2	3
22	Phaant1	gain	IPR000873	I	AMP-dependent synthetase/ligase domain	4	34	13	40	36
22	Phaant1	gain	IPR002921	I	Fungal lipase-like domain	6	27	20	12	14
22	Phaant1	gain	IPR005804	I	Fatty acid desaturase domain	5	29	12	28	20
22	Phaant1	gain	IPR006634	I	TRAM/LAG1/CLN8 homology domain	9	38	24	30	19
22	Phaant1	gain	IPR007130	I	Diacylglycerol acyltransferase	4	16	4	13	11
22	Phaant1	gain	IPR026057	I	PC-Esterase	5	25	19	15	12
22	Phaant1	gain	IPR039633	I	Plastid-lipid-associated protein	3	21	18	14	12
22	Phaant1	gain	IPR007630	K	RNA polymerase sigma-70 region 4	3	9	4	7	2
22	Phaant1	gain	IPR009071	K	High mobility group box domain	4	39	33	32	25
22	Phaant1	gain	IPR044808	K	Ethylene-responsive transcription factor	3	5	0	0	5
22	Phaant1	gain	IPR002562	L	3'-5' exonuclease domain	4	18	8	15	16
22	Phaant1	gain	IPR010285	L	DNA helicase Pif1-like	4	11	7	5	7
22	Phaant1	gain	IPR014830	M	Glycolipid transfer protein domain	4	18	11	15	9
22	Phaant1	gain	IPR021884	M	Ice-binding protein-like	19	20	0	0	0
22	Phaant1	gain	IPR029962	M	Trichome birefringence-like family	3	11	8	6	7
22	Phaant1	gain	IPR037524	M	PA14/GLEYA domain	2	4	2	2	4
22	Phaant1	gain	IPR000387	O	Tyrosine-specific protein phosphatases domain	4	37	23	42	42
22	Phaant1	gain	IPR000569	O	HECT domain	6	33	23	28	27
22	Phaant1	gain	IPR000608	O	Ubiquitin-conjugating enzyme E2	7	46	30	41	34
22	Phaant1	gain	IPR000644	O	CBS domain	6	25	14	19	16
22	Phaant1	gain	IPR000717	O	Proteasome component (PCI) domain	4	20	11	17	17
22	Phaant1	gain	IPR001179	O	FKBP-type peptidyl-prolyl cis-trans isomerase domain	12	93	73	80	63
22	Phaant1	gain	IPR002130	O	Cyclophilin-type peptidyl-prolyl cis-trans isomerase domain	8	71	55	69	51
22	Phaant1	gain	IPR003137	O	PA domain	3	8	1	5	5
22	Phaant1	gain	IPR005936	O	Peptidase, FtsH	5	12	3	7	3
22	Phaant1	gain	IPR011016	O	Zinc finger, RING-CH-type	12	31	17	13	16
22	Phaant1	gain	IPR011705	O	BTB/Kelch-associated	6	45	31	52	8
22	Phaant1	gain	IPR015655	O	Protein phosphatase 2C family	7	46	31	42	43
22	Phaant1	gain	IPR016158	O	Cullin homology domain	3	6	1	3	6
22	Phaant1	gain	IPR022742	O	Serine aminopeptidase, S33	7	23	11	16	13
22	Phaant1	gain	IPR022764	O	Peptidase S54, rhomboid domain	3	14	7	13	11
22	Phaant1	gain	IPR025197	O	Domain of unknown function DUF4116	11	15	3	3	1
22	Phaant1	gain	IPR025799	O	Protein arginine N-methyltransferase	4	21	12	19	16
22	Phaant1	gain	IPR039123	O	Protein phosphatase 2C	2	7	5	5	3
22	Phaant1	gain	IPR044845	O	Glycosyltransferase HPAT/SRGT1-like	4	25	16	24	17
22	Phaant1	gain	IPR045054	O	Prolyl 4-hydroxylase	6	60	41	69	53
22	Phaant1	gain	IPR000863	P	Sulfotransferase domain	12	46	31	28	29
22	Phaant1	gain	IPR001734	P	Sodium/solute symporter	4	11	6	6	7
22	Phaant1	gain	IPR001807	P	Chloride channel, voltage gated	3	17	11	16	7
22	Phaant1	gain	IPR003864	P	CSC1/OSCA1-like, 7TM region	3	10	5	8	6
22	Phaant1	gain	IPR005117	P	Nitrite/Sulfite reductase ferredoxin-like domain	7	10	1	3	5
22	Phaant1	gain	IPR006067	P	Nitrite/sulphite reductase 4Fe-4S domain	7	10	1	3	5
22	Phaant1	gain	IPR008217	P	Ccc1 family	8	12	2	4	6
22	Phaant1	gain	IPR021134	P	Bestrophin/UPF0187	9	67	49	67	46
22	Phaant1	gain	IPR008884	Q	Macrocin-O-methyltransferase	4	18	10	14	11
22	Phaant1	gain	IPR019587	Q	Polyketide cyclase/dehydrase	6	13	6	6	5
22	Phaant1	gain	IPR020946	Q	Flavin monooxygenase-like	4	7	3	3	3
22	Phaant1	gain	IPR000073	R	Alpha/beta hydrolase fold-1	5	55	42	54	46
22	Phaant1	gain	IPR000683	R	Oxidoreductase, N-terminal	4	22	14	19	14
22	Phaant1	gain	IPR001107	R	Band 7 domain	7	25	13	19	15
22	Phaant1	gain	IPR004104	R	Oxidoreductase, C-terminal	6	14	6	7	5
22	Phaant1	gain	IPR005645	R	Serine hydrolase FSH	5	17	10	12	13
22	Phaant1	gain	IPR006073	R	GTP binding domain	4	38	23	44	42
22	Phaant1	gain	IPR006652	R	Kelch repeat type 1	10	61	42	61	26
22	Phaant1	gain	IPR009465	R	Spondin, N-terminal	3	4	1	0	0
22	Phaant1	gain	IPR011527	R	ABC transporter type 1, transmembrane domain	6	47	33	44	48
22	Phaant1	gain	IPR013149	R	Alcohol dehydrogenase, C-terminal	12	30	11	17	19
22	Phaant1	gain	IPR013154	R	Alcohol dehydrogenase, N-terminal	9	24	10	14	22
22	Phaant1	gain	IPR013525	R	ABC-2 type transporter	11	25	8	13	16
22	Phaant1	gain	IPR023210	R	NADP-dependent oxidoreductase domain	7	64	46	69	38
22	Phaant1	gain	IPR024862	R	Transient receptor potential cation channel subfamily V	3	18	13	15	16
22	Phaant1	gain	IPR025306	R	Probable zinc-binding domain	9	13	3	4	1
22	Phaant1	gain	IPR025875	R	Leucine rich repeat 4	3	16	9	16	2
22	Phaant1	gain	IPR027370	R	RING-type zinc-finger, LisH dimerisation motif	3	12	5	9	8
22	Phaant1	gain	IPR041569	R	AAA ATPase, AAA+ lid domain	4	35	24	34	30
22	Phaant1	gain	IPR026891	S	Fibronectin type III-like domain	3	15	6	17	13
22	Phaant1	gain	IPR032808	S	DoxX family	5	8	3	2	7
22	Phaant1	gain	IPR044669	S	UPF0187 family	9	48	33	40	29
22	Phaant1	gain	IPR000961	T	AGC-kinase, C-terminal	4	32	20	37	44
22	Phaant1	gain	IPR001251	T	CRAL-TRIO lipid binding domain	6	54	37	57	52
22	Phaant1	gain	IPR001806	T	Small GTPase	6	42	32	34	36
22	Phaant1	gain	IPR001932	T	PPM-type phosphatase-like domain	8	68	47	68	63
22	Phaant1	gain	IPR002455	T	GPCR family 3, GABA-B receptor	4	8	4	3	1
22	Phaant1	gain	IPR003392	T	Protein patched/dispatched	5	20	6	17	17
22	Phaant1	gain	IPR004342	T	EXS, C-terminal	2	7	1	5	2
22	Phaant1	gain	IPR006201	T	Neurotransmitter-gated ion-channel	7	34	25	26	13
22	Phaant1	gain	IPR006202	T	Neurotransmitter-gated ion-channel ligand-binding domain	3	18	13	17	5
22	Phaant1	gain	IPR016137	T	RGS domain	5	13	3	7	24
22	Phaant1	gain	IPR017978	T	GPCR family 3, C-terminal	5	9	4	3	1
22	Phaant1	gain	IPR028325	T	Voltage-gated potassium channel	4	28	18	31	30
22	Phaant1	gain	IPR040884	T	SMODS and SLOG-associating 2TM effector domain 1	6	9	2	3	5
22	Phaant1	gain	IPR000731	U	Sterol-sensing domain	4	19	8	20	16
22	Phaant1	gain	IPR007248	U	Mpv17/PMP22	5	45	30	50	35
22	Phaant1	gain	IPR031468	U	Synaptotagmin-like mitochondrial-lipid-binding domain	3	6	1	3	6
22	Phaant1	gain	IPR018011	W	Carbohydrate sulfotransferase 8-10	5	15	10	4	5
22	Phaant1	gain	IPR033078	W	Tenascin-C	3	15	5	15	16
22	Phaant1	gain	IPR037359	W	Heparan sulfate sulfotransferase	7	38	25	34	32
22	Phaant1	loss	IPR002156	A	Ribonuclease H domain	2	2	4	4	11
22	Phaant1	loss	IPR001525	B	C-5 cytosine methyltransferase	5	6	35	7	14
22	Phaant1	loss	IPR002857	B	Zinc finger, CXXC-type	4	10	16	16	9
22	Phaant1	loss	IPR023780	B	Chromo domain	4	38	43	51	48
22	Phaant1	loss	IPR011707	C	Multicopper oxidase, type 3	2	1	3	4	3
22	Phaant1	loss	IPR000868	E	Isochorismatase-like	4	7	11	17	6
22	Phaant1	loss	IPR002293	E	Amino acid/polyamine transporter I	3	4	7	8	7
22	Phaant1	loss	IPR006179	F	5'-Nucleotidase/apyrase	3	2	5	10	3
22	Phaant1	loss	IPR001360	G	Glycoside hydrolase family 1	2	5	7	11	7
22	Phaant1	loss	IPR001722	G	Glycoside hydrolase, family 7	3	1	4	10	11
22	Phaant1	loss	IPR002654	G	Glycosyl transferase, family 25	3	6	9	16	8
22	Phaant1	loss	IPR002889	G	Carbohydrate-binding WSC	2	2	4	6	7
22	Phaant1	loss	IPR003406	G	Glycosyl transferase, family 14	3	4	8	11	10
22	Phaant1	loss	IPR008166	G	Glycosyltransferase family 92	2	0	2	4	7
22	Phaant1	loss	IPR009081	I	Phosphopantetheine binding ACP domain	5	17	25	25	23
22	Phaant1	loss	IPR014030	I	Beta-ketoacyl synthase, N-terminal	4	11	16	19	27
22	Phaant1	loss	IPR014031	I	Beta-ketoacyl synthase, C-terminal	4	11	16	19	22
22	Phaant1	loss	IPR001356	K	Homeobox domain	5	17	23	28	16
22	Phaant1	loss	IPR002059	K	Cold-shock protein, DNA-binding	3	19	23	28	14
22	Phaant1	loss	IPR002121	K	HRDC domain	2	4	7	7	3
22	Phaant1	loss	IPR008422	K	Homeobox KN domain	2	1	3	3	3
22	Phaant1	loss	IPR019786	K	Zinc finger, PHD-type, conserved site	11	18	31	45	40
22	Phaant1	loss	IPR019787	K	Zinc finger, PHD-finger	9	28	39	59	55
22	Phaant1	loss	IPR000212	L	DNA helicase, UvrD/REP type	3	2	5	12	10
22	Phaant1	loss	IPR014016	L	UvrD-like helicase, ATP-binding domain	4	2	7	8	9
22	Phaant1	loss	IPR014017	L	UvrD-like DNA helicase, C-terminal	4	3	7	8	12
22	Phaant1	loss	IPR001304	M	C-type lectin-like	15	14	42	32	29
22	Phaant1	loss	IPR045053	M	Mannan endo-1,4-beta-mannosidase-like	2	3	5	6	12
22	Phaant1	loss	IPR003323	O	OTU domain	3	14	17	23	17
22	Phaant1	loss	IPR003540	O	ADP ribosyltransferase	4	1	6	10	4
22	Phaant1	loss	IPR004166	O	MHCK/EF2 kinase	3	2	5	7	6
22	Phaant1	loss	IPR037919	O	UDP-N-acetylglucosamine--peptide N-acetylglucosaminyltransferase 110kDa subunit	3	5	8	14	8
22	Phaant1	loss	IPR039038	O	Aspartyl/asparaginyl beta-hydroxylase family	4	5	9	15	10
22	Phaant1	loss	IPR039367	O	Initiation-specific alpha-1,6-mannosyltransferase Och1-like	2	4	8	7	7
22	Phaant1	loss	IPR040626	O	Cytosolic carboxypeptidase, N-terminal	2	1	3	10	8
22	Phaant1	loss	IPR024041	P	Ammonium transporter AmtB-like domain	6	8	18	16	12
22	Phaant1	loss	IPR002575	Q	Aminoglycoside phosphotransferase	3	9	12	16	11
22	Phaant1	loss	IPR013968	Q	Polyketide synthase, ketoreductase domain	3	5	8	18	15
22	Phaant1	loss	IPR020807	Q	Polyketide synthase, dehydratase domain	2	2	4	8	5
22	Phaant1	loss	IPR000253	R	Forkhead-associated (FHA) domain	7	30	38	52	39
22	Phaant1	loss	IPR000306	R	FYVE zinc finger	4	6	10	19	19
22	Phaant1	loss	IPR000313	R	PWWP domain	5	2	7	12	9
22	Phaant1	loss	IPR001452	R	SH3 domain	6	8	15	22	33
22	Phaant1	loss	IPR001646	R	Pentapeptide repeat	2	7	16	6	7
22	Phaant1	loss	IPR003034	R	SAP domain	15	37	64	57	42
22	Phaant1	loss	IPR004869	R	Membrane transport protein MMPL domain	3	2	5	6	3
22	Phaant1	loss	IPR017455	R	Zinc finger, FYVE-related	4	6	10	19	18
22	Phaant1	loss	IPR025640	R	GYF domain 2	3	8	12	19	15
22	Phaant1	loss	IPR041698	R	Methyltransferase domain 25	4	25	32	29	36
22	Phaant1	loss	IPR005046	S	Protein of unknown function DUF285	4	12	16	23	61
22	Phaant1	loss	IPR007065	S	HPP	3	1	4	6	4
22	Phaant1	loss	IPR010869	S	Protein of unknown function DUF1501	2	1	5	3	1
22	Phaant1	loss	IPR014917	S	Protein of unknown function DUF1800	3	0	3	4	3
22	Phaant1	loss	IPR021838	S	Protein of unknown function DUF3431	4	14	20	27	5
22	Phaant1	loss	IPR022105	S	Protein of unknown function DUF3645	2	3	5	12	15
22	Phaant1	loss	IPR025475	S	Protein of unknown function DUF4326)	3	0	13	3	0
22	Phaant1	loss	IPR000001	T	Kringle	3	11	14	20	18
22	Phaant1	loss	IPR000219	T	Dbl homology (DH) domain	4	8	13	23	17
22	Phaant1	loss	IPR000261	T	EH domain	6	8	16	26	7
22	Phaant1	loss	IPR001368	T	TNFR/NGFR cysteine-rich region	2	1	5	3	2
22	Phaant1	loss	IPR001763	T	Rhodanese-like domain	5	23	29	38	32
22	Phaant1	loss	IPR001828	T	Receptor, ligand binding region	4	9	18	15	2
22	Phaant1	loss	IPR002182	T	NB-ARC	2	7	12	11	5
22	Phaant1	loss	IPR002859	T	PKD/REJ-like domain	2	3	5	7	11
22	Phaant1	loss	IPR006461	T	PLAC8 motif-containing protein	2	5	7	9	4
22	Phaant1	loss	IPR007111	T	NACHT nucleoside triphosphatase	4	0	5	4	6
22	Phaant1	loss	IPR013105	T	Tetratricopeptide repeat 2	3	7	11	10	18
22	Phaant1	loss	IPR026854	U	Vacuolar protein sorting-associated protein 13, N-terminal domain	3	2	5	18	11
22	Phaant1	loss	IPR031646	U	Vacuolar protein sorting-associated protein 13, second N-terminal domain	2	1	3	13	12
22	Phaant1	loss	IPR000998	W	MAM domain	4	3	9	9	2
22	Phaant1	loss	IPR002035	W	von Willebrand factor, type A	8	22	39	31	34
22	Phaant1	loss	IPR007110	W	Immunoglobulin-like domain	2	0	2	5	0
22	Phaant1	loss	IPR013517	W	FG-GAP repeat	9	3	12	23	19
22	Phaant1	loss	IPR017868	Z	Filamin/ABP280 repeat-like	4	11	15	34	24
22	Phaant1	loss	IPR026983	Z	Dynein heavy chain	2	4	6	14	14
22	Phaant1	loss	IPR027640	Z	Kinesin-like protein	4	29	33	59	48
22	Phaant1	loss	IPR044801	Z	Filamin family	5	3	8	11	13
23	Pa+Pg	gain	IPR000558	B	Histone H2B	3	8	7	2	1
23	Pa+Pg	gain	IPR007125	B	Histone H2A/H2B/H3	6	26	24	13	6
23	Pa+Pg	gain	IPR032454	B	Histone H2A, C-terminal domain	3	10	9	4	2
23	Pa+Pg	gain	IPR035425	B	CENP-T/Histone H4, histone fold	4	9	7	0	0
23	Pa+Pg	gain	IPR018316	N	Tubulin/FtsZ, 2-layer sandwich domain	6	18	16	8	2
23	Pa+Pg	gain	IPR003280	P	Two pore domain potassium channel	5	28	27	20	16
23	Pa+Pg	gain	IPR018011	W	Carbohydrate sulfotransferase 8-10	4	15	10	4	5
23	Pa+Pg	loss	IPR002885	A	Pentatricopeptide repeat	8	35	23	53	48
23	Pa+Pg	loss	IPR000408	B	Regulator of chromosome condensation, RCC1	11	45	31	65	81
23	Pa+Pg	loss	IPR011124	B	Zinc finger, CW-type	5	19	15	37	25
23	Pa+Pg	loss	IPR002372	C	Pyrrolo-quinoline quinone repeat	2	2	2	8	2
23	Pa+Pg	loss	IPR002937	E	Amine oxidase	5	19	17	30	26
23	Pa+Pg	loss	IPR013057	E	Amino acid transporter, transmembrane domain	6	28	24	40	40
23	Pa+Pg	loss	IPR023631	E	Amidase signature domain	3	3	3	12	5
23	Pa+Pg	loss	IPR012317	F	Poly(ADP-ribose) polymerase, catalytic domain	9	16	13	34	24
23	Pa+Pg	loss	IPR000757	G	Glycoside hydrolase family 16	3	5	4	11	13
23	Pa+Pg	loss	IPR001173	G	Glycosyltransferase 2-like	4	16	16	24	30
23	Pa+Pg	loss	IPR002018	I	Carboxylesterase, type B	4	3	2	9	13
23	Pa+Pg	loss	IPR007312	I	Phosphoesterase	2	1	0	9	2
23	Pa+Pg	loss	IPR008775	I	Phytanoyl-CoA dioxygenase	8	55	50	87	60
23	Pa+Pg	loss	IPR013120	I	Male sterility, NAD-binding	2	0	0	3	5
23	Pa+Pg	loss	IPR001678	J	SAM-dependent methyltransferase RsmB/NOP2-type	4	11	12	22	26
23	Pa+Pg	loss	IPR000330	K	SNF2, N-terminal	16	34	30	67	71
23	Pa+Pg	loss	IPR005114	K	Helicase-associated	3	4	1	17	3
23	Pa+Pg	loss	IPR019786	K	Zinc finger, PHD-type, conserved site	5	18	31	45	40
23	Pa+Pg	loss	IPR019787	K	Zinc finger, PHD-finger	8	28	39	59	55
23	Pa+Pg	loss	IPR041667	K	Cupin-like domain 8	12	45	44	79	80
23	Pa+Pg	loss	IPR000212	L	DNA helicase, UvrD/REP type	3	2	5	12	10
23	Pa+Pg	loss	IPR001357	L	BRCT domain	4	16	13	26	20
23	Pa+Pg	loss	IPR001943	L	UVR domain	2	1	1	6	0
23	Pa+Pg	loss	IPR032861	M	Xylanase inhibitor, N-terminal	2	0	1	5	8
23	Pa+Pg	loss	IPR000668	O	Peptidase C1A, papain C-terminal	7	13	13	32	27
23	Pa+Pg	loss	IPR000768	O	NAD:arginine ADP-ribosyltransferase, ART	9	5	3	28	11
23	Pa+Pg	loss	IPR001394	O	Peptidase C19, ubiquitin carboxyl-terminal hydrolase	5	24	21	35	38
23	Pa+Pg	loss	IPR001563	O	Peptidase S10, serine carboxypeptidase	4	9	7	19	16
23	Pa+Pg	loss	IPR001810	O	F-box domain	8	40	33	60	55
23	Pa+Pg	loss	IPR002656	O	Acyltransferase 3 domain	3	4	4	12	14
23	Pa+Pg	loss	IPR004170	O	WWE domain	4	4	5	13	10
23	Pa+Pg	loss	IPR013201	O	Cathepsin propeptide inhibitor domain (I29)	3	2	3	11	8
23	Pa+Pg	loss	IPR040626	O	Cytosolic carboxypeptidase, N-terminal	3	1	3	10	8
23	Pa+Pg	loss	IPR001204	P	Phosphate transporter	2	1	1	3	4
23	Pa+Pg	loss	IPR003819	P	TauD/TfdA-like domain	5	16	8	32	12
23	Pa+Pg	loss	IPR007632	P	Anoctamin	3	9	1	13	14
23	Pa+Pg	loss	IPR013968	Q	Polyketide synthase, ketoreductase domain	4	5	8	18	15
23	Pa+Pg	loss	IPR000253	R	Forkhead-associated (FHA) domain	6	30	38	52	39
23	Pa+Pg	loss	IPR001466	R	Beta-lactamase-related	5	13	8	25	28
23	Pa+Pg	loss	IPR005135	R	Endonuclease/exonuclease/phosphatase	7	28	21	43	44
23	Pa+Pg	loss	IPR015914	R	Purple acid phosphatase, N-terminal	2	1	0	6	3
23	Pa+Pg	loss	IPR015940	R	Ubiquitin-associated domain	8	21	18	44	21
23	Pa+Pg	loss	IPR018946	R	Alkaline phosphatase D-related	2	1	0	6	1
23	Pa+Pg	loss	IPR025714	R	Methyltransferase domain	6	29	25	49	37
23	Pa+Pg	loss	IPR025733	R	Iron/zinc purple acid phosphatase-like C-terminal domain	4	1	0	8	6
23	Pa+Pg	loss	IPR026992	R	Non-haem dioxygenase N-terminal domain	3	9	7	19	11
23	Pa+Pg	loss	IPR022099	S	Protein of unknown function DUF3638	4	3	4	13	17
23	Pa+Pg	loss	IPR000203	T	GPS motif	3	8	7	24	11
23	Pa+Pg	loss	IPR001683	T	Phox homology	7	20	15	35	41
23	Pa+Pg	loss	IPR002498	T	Phosphatidylinositol-4-phosphate 5-kinase, core	5	7	6	20	21
23	Pa+Pg	loss	IPR004843	T	Calcineurin-like phosphoesterase domain, ApaH type	8	48	45	69	58
23	Pa+Pg	loss	IPR023610	T	Phosphatidylinositol-4-phosphate 5-kinase	5	5	6	17	17
23	Pa+Pg	loss	IPR041491	T	TRPM, SLOG domain	6	8	9	33	14
23	Pa+Pg	loss	IPR043203	T	Voltage-gated cation channel calcium and sodium	5	15	10	26	27
23	Pa+Pg	loss	IPR003123	U	VPS9 domain	3	6	5	16	10
23	Pa+Pg	loss	IPR026854	U	Vacuolar protein sorting-associated protein 13, N-terminal domain	5	2	5	18	11
23	Pa+Pg	loss	IPR031646	U	Vacuolar protein sorting-associated protein 13, second N-terminal domain	4	1	3	13	12
23	Pa+Pg	loss	IPR045156	U	Vacuolar protein 8	3	9	9	19	14
23	Pa+Pg	loss	IPR003961	W	Fibronectin type III	8	29	24	57	61
23	Pa+Pg	loss	IPR013517	W	FG-GAP repeat	5	3	12	23	19
23	Pa+Pg	loss	IPR013519	W	Integrin alpha beta-propellor	3	0	0	7	7
23	Pa+Pg	loss	IPR013602	Z	Dynein heavy chain, domain-2	4	12	7	27	17
23	Pa+Pg	loss	IPR017868	Z	Filamin/ABP280 repeat-like	7	11	15	34	24
23	Pa+Pg	loss	IPR026983	Z	Dynein heavy chain	3	4	6	14	14
23	Pa+Pg	loss	IPR027640	Z	Kinesin-like protein	10	29	33	59	48
23	Pa+Pg	loss	IPR035699	Z	Dynein heavy chain, hydrolytic ATP-binding dynein motor region	4	12	9	25	16
24	Phaglo1	gain	IPR001525	B	C-5 cytosine methyltransferase	24	6	35	7	14
24	Phaglo1	gain	IPR008906	B	HAT, C-terminal dimerisation domain	4	0	5	0	0
24	Phaglo1	gain	IPR013130	C	Ferric reductase transmembrane component-like domain	2	4	7	5	13
24	Phaglo1	gain	IPR013819	I	Lipoxygenase, C-terminal	2	0	3	0	3
24	Phaglo1	gain	IPR001304	M	C-type lectin-like	13	14	42	32	29
24	Phaglo1	gain	IPR002350	O	Kazal domain	3	5	8	5	0
24	Phaglo1	gain	IPR024041	P	Ammonium transporter AmtB-like domain	4	8	18	16	12
24	Phaglo1	gain	IPR001646	R	Pentapeptide repeat	7	7	16	6	7
24	Phaglo1	gain	IPR003034	R	SAP domain	12	37	64	57	42
24	Phaglo1	gain	IPR010869	S	Protein of unknown function DUF1501	2	1	5	3	1
24	Phaglo1	gain	IPR025475	S	Protein of unknown function DUF4326	10	0	13	3	0
24	Phaglo1	gain	IPR039904	S	TPR and ankyrin repeat-containing protein 1	2	1	3	0	3
24	Phaglo1	gain	IPR001368	T	TNFR/NGFR cysteine-rich region	2	1	5	3	2
24	Phaglo1	gain	IPR001828	T	Receptor, ligand binding region	5	9	18	15	2
24	Phaglo1	gain	IPR002182	T	NB-ARC	3	7	12	11	5
24	Phaglo1	gain	IPR002035	W	von Willebrand factor, type A	9	22	39	31	34
24	Phaglo1	loss	IPR001660	A	Sterile alpha motif domain	8	34	24	45	50
24	Phaglo1	loss	IPR002885	A	Pentatricopeptide repeat	10	35	23	53	48
24	Phaglo1	loss	IPR003100	A	PAZ domain	3	3	0	6	4
24	Phaglo1	loss	IPR003165	A	Piwi domain	4	4	0	5	4
24	Phaglo1	loss	IPR004088	A	K Homology domain, type 1	5	33	24	36	20
24	Phaglo1	loss	IPR007502	A	Helicase-associated domain	5	19	12	20	13
24	Phaglo1	loss	IPR013584	A	RAP domain	4	21	11	15	5
24	Phaglo1	loss	IPR033443	A	Pentacotripeptide-repeat region of PRORP	6	13	6	14	18
24	Phaglo1	loss	IPR045055	A	DNA2/NAM7-like helicase	6	20	13	24	22
24	Phaglo1	loss	IPR045100	A	TUTase nucleotidyltransferase domain	2	12	1	3	3
24	Phaglo1	loss	IPR000408	B	Regulator of chromosome condensation, RCC1	12	45	31	65	81
24	Phaglo1	loss	IPR001739	B	Methyl-CpG DNA binding	4	10	5	11	8
24	Phaglo1	loss	IPR011124	B	Zinc finger, CW-type	4	19	15	37	25
24	Phaglo1	loss	IPR025789	B	Histone-lysine N-methyltransferase DOT1 domain	3	12	9	18	12
24	Phaglo1	loss	IPR001199	C	Cytochrome b5-like heme/steroid binding domain	6	30	22	35	26
24	Phaglo1	loss	IPR001425	C	Archaeal/bacterial/fungal rhodopsins	4	16	7	14	2
24	Phaglo1	loss	IPR001433	C	Oxidoreductase FAD/NAD(P)-binding	5	26	15	21	18
24	Phaglo1	loss	IPR002109	C	Glutaredoxin	4	27	19	25	11
24	Phaglo1	loss	IPR002938	C	FAD-binding domain	12	41	13	24	11
24	Phaglo1	loss	IPR008333	C	Flavoprotein pyridine nucleotide cytochrome reductase-like, FAD-binding domain	3	20	9	11	10
24	Phaglo1	loss	IPR009056	C	Cytochrome c-like domain	3	13	6	10	7
24	Phaglo1	loss	IPR012336	C	Thioredoxin-like fold	5	16	8	15	5
24	Phaglo1	loss	IPR016040	C	NAD(P)-binding domain	4	50	33	31	32
24	Phaglo1	loss	IPR017927	C	FAD-binding domain, ferredoxin reductase-type	5	27	18	23	24
24	Phaglo1	loss	IPR000269	E	Copper amine oxidase	2	4	1	5	0
24	Phaglo1	loss	IPR001320	E	Ionotropic glutamate receptor, C-terminal	4	8	3	14	2
24	Phaglo1	loss	IPR001926	E	Tryptophan synthase beta chain-like, PALP domain	5	29	18	22	22
24	Phaglo1	loss	IPR002912	E	ACT domain	5	14	7	13	14
24	Phaglo1	loss	IPR004839	E	Aminotransferase, class I/classII	6	30	20	29	23
24	Phaglo1	loss	IPR011761	E	ATP-grasp fold	9	22	11	26	21
24	Phaglo1	loss	IPR013057	E	Amino acid transporter, transmembrane domain	4	28	24	40	40
24	Phaglo1	loss	IPR015798	E	Copper amine oxidase, catalytic domain	2	4	1	6	0
24	Phaglo1	loss	IPR001910	F	Inosine/uridine-preferring nucleoside hydrolase domain	5	19	7	13	5
24	Phaglo1	loss	IPR012317	F	Poly(ADP-ribose) polymerase, catalytic domain	3	16	13	34	24
24	Phaglo1	loss	IPR023186	F	Inosine/uridine-preferring nucleoside hydrolase	2	15	2	4	2
24	Phaglo1	loss	IPR000322	G	Glycoside hydrolase family 31	3	8	5	14	14
24	Phaglo1	loss	IPR001296	G	Glycosyl transferase, family 1	3	18	10	13	18
24	Phaglo1	loss	IPR001675	G	Glycosyl transferase family 29	4	32	27	46	24
24	Phaglo1	loss	IPR001764	G	Glycoside hydrolase, family 3, N-terminal	5	13	8	22	15
24	Phaglo1	loss	IPR002659	G	Glycosyl transferase, family 31	6	49	40	61	39
24	Phaglo1	loss	IPR002772	G	Glycoside hydrolase family 3 C-terminal domain	6	16	9	22	17
24	Phaglo1	loss	IPR003337	G	Trehalose-phosphatase	3	11	4	7	13
24	Phaglo1	loss	IPR003440	G	Glycosyl transferase, family 48	2	10	6	8	34
24	Phaglo1	loss	IPR004853	G	Sugar phosphate transporter domain	7	72	58	69	54
24	Phaglo1	loss	IPR005828	G	Major facilitator, sugar transporter-like	5	38	29	37	38
24	Phaglo1	loss	IPR005952	G	Phosphoglycerate mutase 1	4	11	6	12	8
24	Phaglo1	loss	IPR006102	G	Glycoside hydrolase, family 2, immunoglobulin-like beta-sandwich	2	8	5	8	15
24	Phaglo1	loss	IPR006104	G	Glycosyl hydrolases family 2, sugar binding domain	2	7	5	11	14
24	Phaglo1	loss	IPR006813	G	Glycosyl transferase, family 17	3	9	4	10	6
24	Phaglo1	loss	IPR007271	G	Nucleotide-sugar transporter	4	42	32	37	22
24	Phaglo1	loss	IPR013078	G	Histidine phosphatase superfamily, clade-1	6	57	49	77	47
24	Phaglo1	loss	IPR006043	H	Xanthine/uracil/vitamin C permease	2	4	0	2	3
24	Phaglo1	loss	IPR011629	H	Cobalamin (vitamin B12) biosynthesis CobW-like, C-terminal	3	25	20	25	25
24	Phaglo1	loss	IPR000873	I	AMP-dependent synthetase/ligase domain	17	34	13	40	36
24	Phaglo1	loss	IPR003140	I	Phospholipase/carboxylesterase/thioesterase	4	16	10	16	8
24	Phaglo1	loss	IPR005804	I	Fatty acid desaturase domain	12	29	12	28	20
24	Phaglo1	loss	IPR006634	I	TRAM/LAG1/CLN8 homology domain	5	38	24	30	19
24	Phaglo1	loss	IPR007130	I	Diacylglycerol acyltransferase	8	16	4	13	11
24	Phaglo1	loss	IPR007603	I	Choline transporter-like	6	16	8	16	21
24	Phaglo1	loss	IPR008775	I	Phytanoyl-CoA dioxygenase	5	55	50	87	60
24	Phaglo1	loss	IPR014043	I	Acyl transferase	2	6	4	6	8
24	Phaglo1	loss	IPR000330	K	SNF2, N-terminal	4	34	30	67	71
24	Phaglo1	loss	IPR005114	K	Helicase-associated	3	4	1	17	3
24	Phaglo1	loss	IPR007627	K	RNA polymerase sigma-70 region 2	2	10	7	10	4
24	Phaglo1	loss	IPR007630	K	RNA polymerase sigma-70 region 4	2	9	4	7	2
24	Phaglo1	loss	IPR017884	K	SANT domain	3	6	3	9	12
24	Phaglo1	loss	IPR018957	K	Zinc finger, C3HC4 RING-type	8	16	7	23	14
24	Phaglo1	loss	IPR044808	K	Ethylene-responsive transcription factor	2	5	0	0	5
24	Phaglo1	loss	IPR001357	L	BRCT domain	3	16	13	26	20
24	Phaglo1	loss	IPR002562	L	3'-5' exonuclease domain	6	18	8	15	16
24	Phaglo1	loss	IPR006935	L	Helicase/UvrB, N-terminal	4	9	4	10	7
24	Phaglo1	loss	IPR041679	L	DNA2/NAM7 helicase-like, AAA domain	4	19	14	25	19
24	Phaglo1	loss	IPR004302	M	Cellulose/chitin-binding protein, N-terminal	3	5	2	10	4
24	Phaglo1	loss	IPR014830	M	Glycolipid transfer protein domain	3	18	11	15	9
24	Phaglo1	loss	IPR000340	O	Dual specificity phosphatase, catalytic domain	6	26	19	34	30
24	Phaglo1	loss	IPR000387	O	Tyrosine-specific protein phosphatases domain	10	37	23	42	42
24	Phaglo1	loss	IPR000569	O	HECT domain	4	33	23	28	27
24	Phaglo1	loss	IPR000608	O	Ubiquitin-conjugating enzyme E2	9	46	30	41	34
24	Phaglo1	loss	IPR000644	O	CBS domain	5	25	14	19	16
24	Phaglo1	loss	IPR000717	O	Proteasome component (PCI) domain	5	20	11	17	17
24	Phaglo1	loss	IPR000768	O	NAD:arginine ADP-ribosyltransferase, ART	2	5	3	28	11
24	Phaglo1	loss	IPR000834	O	Peptidase M14, carboxypeptidase A	3	14	11	20	17
24	Phaglo1	loss	IPR001179	O	FKBP-type peptidyl-prolyl cis-trans isomerase domain	8	93	73	80	63
24	Phaglo1	loss	IPR001394	O	Peptidase C19, ubiquitin carboxyl-terminal hydrolase	3	24	21	35	38
24	Phaglo1	loss	IPR001563	O	Peptidase S10, serine carboxypeptidase	2	9	7	19	16
24	Phaglo1	loss	IPR001810	O	F-box domain	6	40	33	60	55
24	Phaglo1	loss	IPR002130	O	Cyclophilin-type peptidyl-prolyl cis-trans isomerase domain	8	71	55	69	51
24	Phaglo1	loss	IPR002579	O	Peptide methionine sulphoxide reductase MrsB domain	4	13	7	13	7
24	Phaglo1	loss	IPR002867	O	IBR domain	4	6	2	9	8
24	Phaglo1	loss	IPR003137	O	PA domain	4	8	1	5	5
24	Phaglo1	loss	IPR005936	O	Peptidase, FtsH	4	12	3	7	3
24	Phaglo1	loss	IPR011705	O	BTB/Kelch-associated	8	45	31	52	8
24	Phaglo1	loss	IPR015655	O	Protein phosphatase 2C family	8	46	31	42	43
24	Phaglo1	loss	IPR016158	O	Cullin homology domain	2	6	1	3	6
24	Phaglo1	loss	IPR019410	O	Lysine methyltransferase	6	64	57	85	72
24	Phaglo1	loss	IPR020422	O	Dual specificity protein phosphatase domain	6	22	13	22	18
24	Phaglo1	loss	IPR022742	O	Serine aminopeptidase, S33	5	23	11	16	13
24	Phaglo1	loss	IPR022764	O	Peptidase S54, rhomboid domain	4	14	7	13	11
24	Phaglo1	loss	IPR025799	O	Protein arginine N-methyltransferase	5	21	12	19	16
24	Phaglo1	loss	IPR028427	O	Peptide methionine sulfoxide reductase	2	8	5	10	5
24	Phaglo1	loss	IPR030392	O	Intramolecular chaperone auto-processing domain	3	3	0	8	0
24	Phaglo1	loss	IPR031127	O	E3 ubiquitin ligase RBR family	4	12	7	15	14
24	Phaglo1	loss	IPR044066	O	TRIAD supradomain	5	11	5	12	14
24	Phaglo1	loss	IPR044845	O	Glycosyltransferase HPAT/SRGT1-like	5	25	16	24	17
24	Phaglo1	loss	IPR045054	O	Prolyl 4-hydroxylase	13	60	41	69	53
24	Phaglo1	loss	IPR001807	P	Chloride channel, voltage gated	3	17	11	16	7
24	Phaglo1	loss	IPR003131	P	Potassium channel tetramerisation-type BTB domain	3	14	9	14	14
24	Phaglo1	loss	IPR003644	P	Na-Ca exchanger/integrin-beta4	4	9	3	10	7
24	Phaglo1	loss	IPR003689	P	Zinc/iron permease	4	14	8	15	10
24	Phaglo1	loss	IPR003819	P	TauD/TfdA-like domain	7	16	8	32	12
24	Phaglo1	loss	IPR003864	P	CSC1/OSCA1-like, 7TM region	2	10	5	8	6
24	Phaglo1	loss	IPR004481	P	Sodium/potassium/calcium exchanger	2	8	6	11	17
24	Phaglo1	loss	IPR004837	P	Sodium/calcium exchanger membrane region	6	22	15	30	31
24	Phaglo1	loss	IPR005117	P	Nitrite/Sulfite reductase ferredoxin-like domain	2	10	1	3	5
24	Phaglo1	loss	IPR006067	P	Nitrite/sulphite reductase 4Fe-4S domain	2	10	1	3	5
24	Phaglo1	loss	IPR006121	P	Heavy metal-associated domain, HMA	4	12	6	10	12
24	Phaglo1	loss	IPR006153	P	Cation/H+ exchanger	8	21	11	27	29
24	Phaglo1	loss	IPR007632	P	Anoctamin	7	9	1	13	14
24	Phaglo1	loss	IPR008217	P	Ccc1 family	2	12	2	4	6
24	Phaglo1	loss	IPR008521	P	Magnesium transporter NIPA	5	28	22	36	28
24	Phaglo1	loss	IPR011547	P	SLC26A/SulP transporter domain	4	11	7	19	14
24	Phaglo1	loss	IPR018422	P	Cation/H+ exchanger, CPA1 family	5	10	5	17	18
24	Phaglo1	loss	IPR021134	P	Bestrophin/UPF0187	9	67	49	67	46
24	Phaglo1	loss	IPR002528	Q	Multi antimicrobial extrusion protein	7	23	13	28	16
24	Phaglo1	loss	IPR002925	Q	Dienelactone hydrolase	2	5	3	10	6
24	Phaglo1	loss	IPR008884	Q	Macrocin-O-methyltransferase	4	18	10	14	11
24	Phaglo1	loss	IPR044053	Q	Hydroxylase/desaturase AsaB-like	3	3	0	9	2
24	Phaglo1	loss	IPR000073	R	Alpha/beta hydrolase fold-1	8	55	42	54	46
24	Phaglo1	loss	IPR000620	R	EamA domain	4	24	19	31	23
24	Phaglo1	loss	IPR000683	R	Oxidoreductase, N-terminal	4	22	14	19	14
24	Phaglo1	loss	IPR001107	R	Band 7 domain	5	25	13	19	15
24	Phaglo1	loss	IPR001466	R	Beta-lactamase-related	5	13	8	25	28
24	Phaglo1	loss	IPR004045	R	Glutathione S-transferase, N-terminal	8	51	39	58	33
24	Phaglo1	loss	IPR004046	R	Glutathione S-transferase, C-terminal	7	21	12	24	17
24	Phaglo1	loss	IPR004104	R	Oxidoreductase, C-terminal	2	14	6	7	5
24	Phaglo1	loss	IPR004147	R	UbiB domain	5	31	25	39	38
24	Phaglo1	loss	IPR005135	R	Endonuclease/exonuclease/phosphatase	6	28	21	43	44
24	Phaglo1	loss	IPR006073	R	GTP binding domain	11	38	23	44	42
24	Phaglo1	loss	IPR006652	R	Kelch repeat type 1	9	61	42	61	26
24	Phaglo1	loss	IPR007197	R	Radical SAM	6	20	12	22	19
24	Phaglo1	loss	IPR007848	R	Methyltransferase small domain	2	4	2	9	2
24	Phaglo1	loss	IPR007867	R	Glucose-methanol-choline oxidoreductase, C-terminal	3	5	1	4	5
24	Phaglo1	loss	IPR010987	R	Glutathione S-transferase, C-terminal-like	10	33	20	46	21
24	Phaglo1	loss	IPR011527	R	ABC transporter type 1, transmembrane domain	8	47	33	44	48
24	Phaglo1	loss	IPR013094	R	Alpha/beta hydrolase fold-3	8	22	11	24	20
24	Phaglo1	loss	IPR013149	R	Alcohol dehydrogenase, C-terminal	7	30	11	17	19
24	Phaglo1	loss	IPR013154	R	Alcohol dehydrogenase, N-terminal	5	24	10	14	22
24	Phaglo1	loss	IPR013216	R	Methyltransferase type 11	4	50	44	57	57
24	Phaglo1	loss	IPR013525	R	ABC-2 type transporter	6	25	8	13	16
24	Phaglo1	loss	IPR013658	R	SMP-30/Gluconolactonase/LRE-like region	3	5	1	5	3
24	Phaglo1	loss	IPR013750	R	GHMP kinase, C-terminal domain	5	7	1	9	9
24	Phaglo1	loss	IPR015940	R	Ubiquitin-associated domain	3	21	18	44	21
24	Phaglo1	loss	IPR020471	R	Aldo/keto reductase	5	27	21	39	22
24	Phaglo1	loss	IPR023210	R	NADP-dependent oxidoreductase domain	11	64	46	69	38
24	Phaglo1	loss	IPR025110	R	AMP-binding enzyme, C-terminal domain	6	14	6	14	17
24	Phaglo1	loss	IPR025714	R	Methyltransferase domain	4	29	25	49	37
24	Phaglo1	loss	IPR025875	R	Leucine rich repeat 4	4	16	9	16	2
24	Phaglo1	loss	IPR026992	R	Non-haem dioxygenase N-terminal domain	2	9	7	19	11
24	Phaglo1	loss	IPR027370	R	RING-type zinc-finger, LisH dimerisation motif	4	12	5	9	8
24	Phaglo1	loss	IPR027815	R	10TM putative phosphate transporter, cytosolic domain	3	6	2	5	12
24	Phaglo1	loss	IPR039448	R	Right handed beta helix domain	3	16	11	16	21
24	Phaglo1	loss	IPR041569	R	AAA ATPase, AAA+ lid domain	7	35	24	34	30
24	Phaglo1	loss	IPR003877	S	SPRY domain	2	8	6	17	8
24	Phaglo1	loss	IPR026891	S	Fibronectin type III-like domain	6	15	6	17	13
24	Phaglo1	loss	IPR026913	S	Methyltransferase-like protein 24	4	20	15	33	15
24	Phaglo1	loss	IPR044669	S	UPF0187 family	6	48	33	40	29
24	Phaglo1	loss	IPR000014	T	PAS domain	3	25	20	25	22
24	Phaglo1	loss	IPR000157	T	Toll/interleukin-1 receptor homology (TIR) domain	9	29	17	40	18
24	Phaglo1	loss	IPR000909	T	Phosphatidylinositol-specific phospholipase C, X domain	3	12	8	16	21
24	Phaglo1	loss	IPR000961	T	AGC-kinase, C-terminal	8	32	20	37	44
24	Phaglo1	loss	IPR001192	T	Phosphoinositide phospholipase C family	4	15	9	16	25
24	Phaglo1	loss	IPR001251	T	CRAL-TRIO lipid binding domain	11	54	37	57	52
24	Phaglo1	loss	IPR001293	T	Zinc finger, TRAF-type	2	9	7	15	5
24	Phaglo1	loss	IPR001440	T	Tetratricopeptide repeat 1	4	7	2	8	8
24	Phaglo1	loss	IPR001683	T	Phox homology	5	20	15	35	41
24	Phaglo1	loss	IPR001711	T	Phospholipase C, phosphatidylinositol-specific, Y domain	3	14	9	16	14
24	Phaglo1	loss	IPR001806	T	Small GTPase	4	42	32	34	36
24	Phaglo1	loss	IPR001932	T	PPM-type phosphatase-like domain	13	68	47	68	63
24	Phaglo1	loss	IPR002073	T	3'5'-cyclic nucleotide phosphodiesterase, catalytic domain	3	11	7	14	19
24	Phaglo1	loss	IPR003018	T	GAF domain	4	13	8	16	20
24	Phaglo1	loss	IPR003392	T	Protein patched/dispatched	9	20	6	17	17
24	Phaglo1	loss	IPR003661	T	Signal transduction histidine kinase, dimerisation/phosphoacceptor domain	3	3	0	4	4
24	Phaglo1	loss	IPR004342	T	EXS, C-terminal	4	7	1	5	2
24	Phaglo1	loss	IPR009769	T	Protein ENHANCED DISEASE RESISTANCE 2, C-terminal	5	12	5	13	13
24	Phaglo1	loss	IPR013111	T	EGF-like domain, extracellular	3	7	3	11	13
24	Phaglo1	loss	IPR013122	T	Polycystin cation channel, PKD1/PKD2	5	26	20	37	37
24	Phaglo1	loss	IPR016137	T	RGS domain	5	13	3	7	24
24	Phaglo1	loss	IPR017441	T	Protein kinase, ATP binding site	4	15	9	15	14
24	Phaglo1	loss	IPR028325	T	Voltage-gated potassium channel	6	28	18	31	30
24	Phaglo1	loss	IPR037516	T	Tripartite DENN domain	3	7	4	14	14
24	Phaglo1	loss	IPR043203	T	Voltage-gated cation channel calcium and sodium	5	15	10	26	27
24	Phaglo1	loss	IPR043211	T	TNF receptor-associated factor TRAF	2	5	3	6	3
24	Phaglo1	loss	IPR043533	T	Cyclic nucleotide-binding domain-containing protein 1/2	3	8	4	13	5
24	Phaglo1	loss	IPR045122	T	Calcium permeable stress-gated cation channel 1-like	4	24	17	26	29
24	Phaglo1	loss	IPR000195	U	Rab-GTPase-TBC domain	3	19	15	26	27
24	Phaglo1	loss	IPR000731	U	Sterol-sensing domain	7	19	8	20	16
24	Phaglo1	loss	IPR006311	U	Twin-arginine translocation pathway, signal sequence	4	33	26	36	18
24	Phaglo1	loss	IPR007248	U	Mpv17/PMP22	10	45	30	50	35
24	Phaglo1	loss	IPR023362	U	PH-BEACH domain	2	3	1	6	11
24	Phaglo1	loss	IPR026847	U	Vacuolar protein sorting-associated protein 13	5	10	5	17	24
24	Phaglo1	loss	IPR031468	U	Synaptotagmin-like mitochondrial-lipid-binding domain	2	6	1	3	6
24	Phaglo1	loss	IPR003961	W	Fibronectin type III	5	29	24	57	61
24	Phaglo1	loss	IPR004263	W	Exostosin-like	8	78	66	95	73
24	Phaglo1	loss	IPR033078	W	Tenascin-C	7	15	5	15	16
24	Phaglo1	loss	IPR037359	W	Heparan sulfate sulfotransferase	6	38	25	34	32
24	Phaglo1	loss	IPR001715	Z	Calponin homology domain	5	24	16	23	29
24	Phaglo1	loss	IPR004000	Z	Actin family	3	15	12	20	11
24	Phaglo1	loss	IPR004273	Z	Dynein heavy chain region D6 P-loop domain	6	18	10	25	19
24	Phaglo1	loss	IPR013602	Z	Dynein heavy chain, domain-2	5	12	7	27	17
24	Phaglo1	loss	IPR024317	Z	Dynein heavy chain, AAA module D4	4	14	10	24	23
24	Phaglo1	loss	IPR024743	Z	Dynein heavy chain, coiled coil stalk	4	14	10	21	21
24	Phaglo1	loss	IPR035699	Z	Dynein heavy chain, hydrolytic ATP-binding dynein motor region	3	12	9	25	16
24	Phaglo1	loss	IPR035706	Z	Dynein heavy chain, ATP-binding dynein motor region	4	16	11	25	21
24	Phaglo1	loss	IPR041228	Z	Dynein heavy chain, C-terminal domain	7	20	12	30	23
24	Phaglo1	loss	IPR041466	Z	Dynein heavy chain, AAA 5 extension domain	3	12	9	22	10
24	Phaglo1	loss	IPR041589	Z	Dynein heavy chain 3, AAA+ lid domain	4	14	9	21	12
24	Phaglo1	loss	IPR041658	Z	Dynein heavy chain AAA lid domain	5	18	11	23	19
25	Pa+Pg+Pc	gain	IPR001425	C	Archaeal/bacterial/fungal rhodopsins	9	16	7	14	2
25	Pa+Pg+Pc	gain	IPR002109	C	Glutaredoxin	7	27	19	25	11
25	Pa+Pg+Pc	gain	IPR000269	E	Copper amine oxidase	2	4	1	5	0
25	Pa+Pg+Pc	gain	IPR001320	E	Ionotropic glutamate receptor, C-terminal	4	8	3	14	2
25	Pa+Pg+Pc	gain	IPR015798	E	Copper amine oxidase, catalytic domain	2	4	1	6	0
25	Pa+Pg+Pc	gain	IPR001910	F	Inosine/uridine-preferring nucleoside hydrolase domain	6	19	7	13	5
25	Pa+Pg+Pc	gain	IPR001223	G	Glycoside hydrolase family 18, catalytic domain	7	19	14	20	8
25	Pa+Pg+Pc	gain	IPR001675	G	Glycosyl transferase family 29	10	32	27	46	24
25	Pa+Pg+Pc	gain	IPR002659	G	Glycosyl transferase, family 31	14	49	40	61	39
25	Pa+Pg+Pc	gain	IPR004853	G	Sugar phosphate transporter domain	12	72	58	69	54
25	Pa+Pg+Pc	gain	IPR007657	G	Glycosyltransferase 61	12	48	50	67	50
25	Pa+Pg+Pc	gain	IPR011598	K	Myc-type, basic helix-loop-helix (bHLH) domain	2	3	3	5	0
25	Pa+Pg+Pc	gain	IPR001002	M	Chitin-binding, type 1	8	11	12	9	0
25	Pa+Pg+Pc	gain	IPR000626	O	Ubiquitin-like domain	16	72	67	78	41
25	Pa+Pg+Pc	gain	IPR001461	O	Aspartic peptidase A1 family	7	24	24	29	20
25	Pa+Pg+Pc	gain	IPR002350	O	Kazal domain	4	5	8	5	0
25	Pa+Pg+Pc	gain	IPR003582	O	ShKT domain	16	77	79	85	64
25	Pa+Pg+Pc	gain	IPR011705	O	BTB/Kelch-associated	20	45	31	52	8
25	Pa+Pg+Pc	gain	IPR024983	O	CHAT domain	5	8	10	18	5
25	Pa+Pg+Pc	gain	IPR030392	O	Intramolecular chaperone auto-processing domain	2	3	0	8	0
25	Pa+Pg+Pc	gain	IPR033121	O	Peptidase family A1 domain	8	25	25	32	21
25	Pa+Pg+Pc	gain	IPR000863	P	Sulfotransferase domain	8	46	31	28	29
25	Pa+Pg+Pc	gain	IPR001807	P	Chloride channel, voltage gated	5	17	11	16	7
25	Pa+Pg+Pc	gain	IPR021134	P	Bestrophin/UPF0187	14	67	49	67	46
25	Pa+Pg+Pc	gain	IPR006652	R	Kelch repeat type 1	21	61	42	61	26
25	Pa+Pg+Pc	gain	IPR023210	R	NADP-dependent oxidoreductase domain	11	64	46	69	38
25	Pa+Pg+Pc	gain	IPR025875	R	Leucine rich repeat 4	7	16	9	16	2
25	Pa+Pg+Pc	gain	IPR021838	S	Protein of unknown function DUF3431	9	14	20	27	5
25	Pa+Pg+Pc	gain	IPR026913	S	Methyltransferase-like protein 24	7	20	15	33	15
25	Pa+Pg+Pc	gain	IPR000261	T	EH domain	6	8	16	26	7
25	Pa+Pg+Pc	gain	IPR001828	T	Receptor, ligand binding region	7	9	18	15	2
25	Pa+Pg+Pc	gain	IPR002182	T	NB-ARC	5	7	12	11	5
25	Pa+Pg+Pc	gain	IPR002455	T	GPCR family 3, GABA-B receptor	2	8	4	3	1
25	Pa+Pg+Pc	gain	IPR006201	T	Neurotransmitter-gated ion-channel	8	34	25	26	13
25	Pa+Pg+Pc	gain	IPR006202	T	Neurotransmitter-gated ion-channel ligand-binding domain	8	18	13	17	5
25	Pa+Pg+Pc	gain	IPR013017	T	NHL repeat, subgroup	7	22	22	32	11
25	Pa+Pg+Pc	gain	IPR017978	T	GPCR family 3, C-terminal	2	9	4	3	1
25	Pa+Pg+Pc	gain	IPR006311	U	Twin-arginine translocation pathway, signal sequence	8	33	26	36	18
25	Pa+Pg+Pc	gain	IPR004263	W	Exostosin-like	18	78	66	95	73
25	Pa+Pg+Pc	gain	IPR005331	W	Sulfotransferase	29	76	72	76	55
25	Pa+Pg+Pc	gain	IPR037359	W	Heparan sulfate sulfotransferase	9	38	25	34	32
25	Pa+Pg+Pc	loss	IPR002156	A	Ribonuclease H domain	5	2	4	4	11
25	Pa+Pg+Pc	loss	IPR044808	K	Ethylene-responsive transcription factor	4	5	0	0	5
26	Phacor1	gain	IPR001660	A	Sterile alpha motif domain	10	34	24	45	50
26	Phacor1	gain	IPR002885	A	Pentatricopeptide repeat	12	35	23	53	48
26	Phacor1	gain	IPR003100	A	PAZ domain	3	3	0	6	4
26	Phacor1	gain	IPR004088	A	K Homology domain, type 1	6	33	24	36	20
26	Phacor1	gain	IPR000408	B	Regulator of chromosome condensation, RCC1	11	45	31	65	81
26	Phacor1	gain	IPR011124	B	Zinc finger, CW-type	13	19	15	37	25
26	Phacor1	gain	IPR025789	B	Histone-lysine N-methyltransferase DOT1 domain	5	12	9	18	12
26	Phacor1	gain	IPR002372	C	Pyrrolo-quinoline quinone repeat	4	2	2	8	2
26	Phacor1	gain	IPR044831	C	Heme-binding peroxidase Ccp1-like	3	4	3	8	5
26	Phacor1	gain	IPR030616	D	Aurora kinase	4	6	5	11	5
26	Phacor1	gain	IPR001320	E	Ionotropic glutamate receptor, C-terminal	7	8	3	14	2
26	Phacor1	gain	IPR002937	E	Amine oxidase	6	19	17	30	26
26	Phacor1	gain	IPR004304	E	Acetamidase/Formamidase	3	1	1	5	2
26	Phacor1	gain	IPR015798	E	Copper amine oxidase, catalytic domain	3	4	1	6	0
26	Phacor1	gain	IPR023631	E	Amidase signature domain	6	3	3	12	5
26	Phacor1	gain	IPR006179	F	5'-Nucleotidase/apyrase	4	2	5	10	3
26	Phacor1	gain	IPR006330	F	Adenosine/adenine deaminase	5	3	2	10	2
26	Phacor1	gain	IPR012317	F	Poly(ADP-ribose) polymerase, catalytic domain	9	16	13	34	24
26	Phacor1	gain	IPR023379	F	BART domain	8	15	17	26	16
26	Phacor1	gain	IPR000322	G	Glycoside hydrolase family 31	4	8	5	14	14
26	Phacor1	gain	IPR001509	G	NAD-dependent epimerase/dehydratase	6	30	28	36	18
26	Phacor1	gain	IPR001547	G	Glycoside hydrolase, family 5	11	26	28	42	34
26	Phacor1	gain	IPR001675	G	Glycosyl transferase family 29	13	32	27	46	24
26	Phacor1	gain	IPR001722	G	Glycoside hydrolase, family 7	4	1	4	10	11
26	Phacor1	gain	IPR001764	G	Glycoside hydrolase, family 3, N-terminal	6	13	8	22	15
26	Phacor1	gain	IPR002241	G	Glycoside hydrolase, family 27	6	12	10	20	18
26	Phacor1	gain	IPR002654	G	Glycosyl transferase, family 25	6	6	9	16	8
26	Phacor1	gain	IPR002659	G	Glycosyl transferase, family 31	13	49	40	61	39
26	Phacor1	gain	IPR002772	G	Glycoside hydrolase family 3 C-terminal domain	5	16	9	22	17
26	Phacor1	gain	IPR007577	G	Glycosyltransferase, DXD sugar-binding motif	14	32	33	51	30
26	Phacor1	gain	IPR007657	G	Glycosyltransferase 61	14	48	50	67	50
26	Phacor1	gain	IPR008630	G	Glycosyltransferase 34	4	10	12	16	11
26	Phacor1	gain	IPR013078	G	Histidine phosphatase superfamily, clade-1	17	57	49	77	47
26	Phacor1	gain	IPR007312	I	Phosphoesterase	6	1	0	9	2
26	Phacor1	gain	IPR008775	I	Phytanoyl-CoA dioxygenase	24	55	50	87	60
26	Phacor1	gain	IPR001678	J	SAM-dependent methyltransferase RsmB/NOP2-type	6	11	12	22	26
26	Phacor1	gain	IPR000330	K	SNF2, N-terminal	17	34	30	67	71
26	Phacor1	gain	IPR005114	K	Helicase-associated	10	4	1	17	3
26	Phacor1	gain	IPR018957	K	Zinc finger, C3HC4 RING-type	6	16	7	23	14
26	Phacor1	gain	IPR019786	K	Zinc finger, PHD-type, conserved site	11	18	31	45	40
26	Phacor1	gain	IPR019787	K	Zinc finger, PHD-finger	14	28	39	59	55
26	Phacor1	gain	IPR041667	K	Cupin-like domain 8	21	45	44	79	80
26	Phacor1	gain	IPR000212	L	DNA helicase, UvrD/REP type	4	2	5	12	10
26	Phacor1	gain	IPR001357	L	BRCT domain	6	16	13	26	20
26	Phacor1	gain	IPR001510	L	Zinc finger, PARP-type	5	9	9	15	8
26	Phacor1	gain	IPR001943	L	UVR domain	3	1	1	6	0
26	Phacor1	gain	IPR004302	M	Cellulose/chitin-binding protein, N-terminal	4	5	2	10	4
26	Phacor1	gain	IPR004344	N	Tubulin-tyrosine ligase/Tubulin polyglutamylase	7	25	25	35	38
26	Phacor1	gain	IPR000340	O	Dual specificity phosphatase, catalytic domain	6	26	19	34	30
26	Phacor1	gain	IPR000668	O	Peptidase C1A, papain C-terminal	12	13	13	32	27
26	Phacor1	gain	IPR000768	O	NAD:arginine ADP-ribosyltransferase, ART	14	5	3	28	11
26	Phacor1	gain	IPR001394	O	Peptidase C19, ubiquitin carboxyl-terminal hydrolase	6	24	21	35	38
26	Phacor1	gain	IPR001563	O	Peptidase S10, serine carboxypeptidase	6	9	7	19	16
26	Phacor1	gain	IPR001810	O	F-box domain	13	40	33	60	55
26	Phacor1	gain	IPR002083	O	MATH/TRAF domain	3	3	3	8	4
26	Phacor1	gain	IPR002656	O	Acyltransferase 3 domain	5	4	4	12	14
26	Phacor1	gain	IPR003540	O	ADP ribosyltransferase	4	1	6	10	4
26	Phacor1	gain	IPR004170	O	WWE domain	4	4	5	13	10
26	Phacor1	gain	IPR006598	O	Glycosyl transferase CAP10 domain	15	30	34	52	43
26	Phacor1	gain	IPR011705	O	BTB/Kelch-associated	12	45	31	52	8
26	Phacor1	gain	IPR013201	O	Cathepsin propeptide inhibitor domain (I29)	5	2	3	11	8
26	Phacor1	gain	IPR019378	O	GDP-fucose protein O-fucosyltransferase	5	15	17	22	20
26	Phacor1	gain	IPR019410	O	Lysine methyltransferase	16	64	57	85	72
26	Phacor1	gain	IPR024983	O	CHAT domain	7	8	10	18	5
26	Phacor1	gain	IPR028889	O	Ubiquitin specific protease domain	6	24	22	34	38
26	Phacor1	gain	IPR029489	O	O-GlcNAc transferase, C-terminal	8	6	5	16	10
26	Phacor1	gain	IPR030392	O	Intramolecular chaperone auto-processing domain	5	3	0	8	0
26	Phacor1	gain	IPR033121	O	Peptidase family A1 domain	6	25	25	32	21
26	Phacor1	gain	IPR037919	O	UDP-N-acetylglucosamine--peptide N-acetylglucosaminyltransferase 110kDa subunit	5	5	8	14	8
26	Phacor1	gain	IPR039038	O	Aspartyl/asparaginyl beta-hydroxylase family	4	5	9	15	10
26	Phacor1	gain	IPR040626	O	Cytosolic carboxypeptidase, N-terminal	4	1	3	10	8
26	Phacor1	gain	IPR045054	O	Prolyl 4-hydroxylase	11	60	41	69	53
26	Phacor1	gain	IPR003819	P	TauD/TfdA-like domain	12	16	8	32	12
26	Phacor1	gain	IPR004837	P	Sodium/calcium exchanger membrane region	6	22	15	30	31
26	Phacor1	gain	IPR008521	P	Magnesium transporter NIPA	6	28	22	36	28
26	Phacor1	gain	IPR011547	P	SLC26A/SulP transporter domain	6	11	7	19	14
26	Phacor1	gain	IPR018422	P	Cation/H+ exchanger, CPA1 family	5	10	5	17	18
26	Phacor1	gain	IPR021134	P	Bestrophin/UPF0187	8	67	49	67	46
26	Phacor1	gain	IPR002528	Q	Multi antimicrobial extrusion protein	6	23	13	28	16
26	Phacor1	gain	IPR013968	Q	Polyketide synthase, ketoreductase domain	6	5	8	18	15
26	Phacor1	gain	IPR040632	Q	Sulfotransferase, S. mansonii-type	6	17	18	25	27
26	Phacor1	gain	IPR044053	Q	Hydroxylase/desaturase AsaB-like	5	3	0	9	2
26	Phacor1	gain	IPR044861	Q	Isopenicillin N synthase-like, Fe(2+) 2OG dioxygenase domain	8	16	15	27	12
26	Phacor1	gain	IPR000086	R	NUDIX hydrolase domain	9	37	34	48	29
26	Phacor1	gain	IPR000253	R	Forkhead-associated (FHA) domain	9	30	38	52	39
26	Phacor1	gain	IPR000306	R	FYVE zinc finger	6	6	10	19	19
26	Phacor1	gain	IPR000313	R	PWWP domain	4	2	7	12	9
26	Phacor1	gain	IPR001452	R	SH3 domain	5	8	15	22	33
26	Phacor1	gain	IPR001466	R	Beta-lactamase-related	7	13	8	25	28
26	Phacor1	gain	IPR004045	R	Glutathione S-transferase, N-terminal	9	51	39	58	33
26	Phacor1	gain	IPR005025	R	NADPH-dependent FMN reductase-like	3	2	1	5	0
26	Phacor1	gain	IPR005135	R	Endonuclease/exonuclease/phosphatase	9	28	21	43	44
26	Phacor1	gain	IPR006073	R	GTP binding domain	7	38	23	44	42
26	Phacor1	gain	IPR006652	R	Kelch repeat type 1	10	61	42	61	26
26	Phacor1	gain	IPR007848	R	Methyltransferase small domain	4	4	2	9	2
26	Phacor1	gain	IPR010987	R	Glutathione S-transferase, C-terminal-like	12	33	20	46	21
26	Phacor1	gain	IPR013657	R	UAA transporter	5	17	15	23	8
26	Phacor1	gain	IPR015914	R	Purple acid phosphatase, N-terminal	3	1	0	6	3
26	Phacor1	gain	IPR015940	R	Ubiquitin-associated domain	15	21	18	44	21
26	Phacor1	gain	IPR017455	R	Zinc finger, FYVE-related	6	6	10	19	18
26	Phacor1	gain	IPR018946	R	Alkaline phosphatase D-related	3	1	0	6	1
26	Phacor1	gain	IPR020471	R	Aldo/keto reductase	10	27	21	39	22
26	Phacor1	gain	IPR023210	R	NADP-dependent oxidoreductase domain	10	64	46	69	38
26	Phacor1	gain	IPR025640	R	GYF domain 2	6	8	12	19	15
26	Phacor1	gain	IPR025714	R	Methyltransferase domain	14	29	25	49	37
26	Phacor1	gain	IPR025733	R	Iron/zinc purple acid phosphatase-like C-terminal domain	3	1	0	8	6
26	Phacor1	gain	IPR026992	R	Non-haem dioxygenase N-terminal domain	7	9	7	19	11
26	Phacor1	gain	IPR003877	S	SPRY domain	7	8	6	17	8
26	Phacor1	gain	IPR021838	S	Protein of unknown function DUF3431	8	14	20	27	5
26	Phacor1	gain	IPR022099	S	Protein of unknown function DUF3638	5	3	4	13	17
26	Phacor1	gain	IPR022105	S	Protein of unknown function DUF3645	5	3	5	12	15
26	Phacor1	gain	IPR026913	S	Methyltransferase-like protein 24	12	20	15	33	15
26	Phacor1	gain	IPR000001	T	Kringle	5	11	14	20	18
26	Phacor1	gain	IPR000157	T	Toll/interleukin-1 receptor homology (TIR) domain	11	29	17	40	18
26	Phacor1	gain	IPR000203	T	GPS motif	13	8	7	24	11
26	Phacor1	gain	IPR000219	T	Dbl homology (DH) domain	9	8	13	23	17
26	Phacor1	gain	IPR000261	T	EH domain	11	8	16	26	7
26	Phacor1	gain	IPR000421	T	Coagulation factor 5/8 C-terminal domain	5	12	12	19	12
26	Phacor1	gain	IPR000961	T	AGC-kinase, C-terminal	7	32	20	37	44
26	Phacor1	gain	IPR001190	T	SRCR domain	3	6	5	9	5
26	Phacor1	gain	IPR001293	T	Zinc finger, TRAF-type	5	9	7	15	5
26	Phacor1	gain	IPR001300	T	Peptidase C2, calpain, catalytic domain	5	19	19	26	24
26	Phacor1	gain	IPR001683	T	Phox homology	8	20	15	35	41
26	Phacor1	gain	IPR001763	T	Rhodanese-like domain	7	23	29	38	32
26	Phacor1	gain	IPR002498	T	Phosphatidylinositol-4-phosphate 5-kinase, core	8	7	6	20	21
26	Phacor1	gain	IPR004843	T	Calcineurin-like phosphoesterase domain, ApaH type	13	48	45	69	58
26	Phacor1	gain	IPR011641	T	Tyrosine-protein kinase ephrin type A/B receptor-like	6	10	12	19	11
26	Phacor1	gain	IPR013017	T	NHL repeat, subgroup	8	22	22	32	11
26	Phacor1	gain	IPR013111	T	EGF-like domain, extracellular	4	7	3	11	13
26	Phacor1	gain	IPR013122	T	Polycystin cation channel, PKD1/PKD2	9	26	20	37	37
26	Phacor1	gain	IPR013767	T	PAS fold	3	2	3	7	7
26	Phacor1	gain	IPR023610	T	Phosphatidylinositol-4-phosphate 5-kinase	6	5	6	17	17
26	Phacor1	gain	IPR028325	T	Voltage-gated potassium channel	6	28	18	31	30
26	Phacor1	gain	IPR029023	T	Tensin-type phosphatase domain	4	4	3	9	9
26	Phacor1	gain	IPR031649	T	Voltage-dependent L-type calcium channel, IQ-associated domain	5	3	2	8	1
26	Phacor1	gain	IPR037516	T	Tripartite DENN domain	5	7	4	14	14
26	Phacor1	gain	IPR041491	T	TRPM, SLOG domain	18	8	9	33	14
26	Phacor1	gain	IPR043203	T	Voltage-gated cation channel calcium and sodium	6	15	10	26	27
26	Phacor1	gain	IPR043533	T	Cyclic nucleotide-binding domain-containing protein 1/2	5	8	4	13	5
26	Phacor1	gain	IPR000195	U	Rab-GTPase-TBC domain	5	19	15	26	27
26	Phacor1	gain	IPR003123	U	VPS9 domain	7	6	5	16	10
26	Phacor1	gain	IPR007248	U	Mpv17/PMP22	8	45	30	50	35
26	Phacor1	gain	IPR026854	U	Vacuolar protein sorting-associated protein 13, N-terminal domain	8	2	5	18	11
26	Phacor1	gain	IPR031646	U	Vacuolar protein sorting-associated protein 13, second N-terminal domain	6	1	3	13	12
26	Phacor1	gain	IPR045052	U	Copine	2	1	0	3	0
26	Phacor1	gain	IPR045063	U	Dynamin, N-terminal	5	10	12	20	11
26	Phacor1	gain	IPR045156	U	Vacuolar protein 8	7	9	9	19	14
26	Phacor1	gain	IPR003961	W	Fibronectin type III	20	29	24	57	61
26	Phacor1	gain	IPR004263	W	Exostosin-like	17	78	66	95	73
26	Phacor1	gain	IPR007110	W	Immunoglobulin-like domain	3	0	2	5	0
26	Phacor1	gain	IPR013517	W	FG-GAP repeat	6	3	12	23	19
26	Phacor1	gain	IPR013519	W	Integrin alpha beta-propellor	4	0	0	7	7
26	Phacor1	gain	IPR004273	Z	Dynein heavy chain region D6 P-loop domain	7	18	10	25	19
26	Phacor1	gain	IPR013594	Z	Dynein heavy chain, domain-1	4	5	4	10	6
26	Phacor1	gain	IPR013602	Z	Dynein heavy chain, domain-2	11	12	7	27	17
26	Phacor1	gain	IPR017868	Z	Filamin/ABP280 repeat-like	12	11	15	34	24
26	Phacor1	gain	IPR024317	Z	Dynein heavy chain, AAA module D4	7	14	10	24	23
26	Phacor1	gain	IPR024743	Z	Dynein heavy chain, coiled coil stalk	5	14	10	21	21
26	Phacor1	gain	IPR026983	Z	Dynein heavy chain	5	4	6	14	14
26	Phacor1	gain	IPR027640	Z	Kinesin-like protein	16	29	33	59	48
26	Phacor1	gain	IPR035699	Z	Dynein heavy chain, hydrolytic ATP-binding dynein motor region	9	12	9	25	16
26	Phacor1	gain	IPR035706	Z	Dynein heavy chain, ATP-binding dynein motor region	7	16	11	25	21
26	Phacor1	gain	IPR041228	Z	Dynein heavy chain, C-terminal domain	8	20	12	30	23
26	Phacor1	gain	IPR041466	Z	Dynein heavy chain, AAA 5 extension domain	8	12	9	22	10
26	Phacor1	gain	IPR041589	Z	Dynein heavy chain 3, AAA+ lid domain	6	14	9	21	12
26	Phacor1	gain	IPR041658	Z	Dynein heavy chain AAA lid domain	5	18	11	23	19
26	Phacor1	loss	IPR007125	B	Histone H2A/H2B/H3	5	26	24	13	6
26	Phacor1	loss	IPR025476	B	Helitron helicase-like domain	2	6	2	0	1
26	Phacor1	loss	IPR035425	B	CENP-T/Histone H4, histone fold	3	9	7	0	0
26	Phacor1	loss	IPR006094	C	FAD linked oxidase, N-terminal	4	23	14	9	15
26	Phacor1	loss	IPR002213	G	UDP-glucuronosyl/UDP-glucosyltransferase	2	3	4	1	5
26	Phacor1	loss	IPR002921	I	Fungal lipase-like domain	6	27	20	12	14
26	Phacor1	loss	IPR044808	K	Ethylene-responsive transcription factor	2	5	0	0	5
27	Phaeocystales	gain	IPR001660	A	Sterile alpha motif domain	4	34	24	45	50
27	Phaeocystales	gain	IPR003440	G	Glycosyl transferase, family 48	4	10	6	8	34
27	Phaeocystales	gain	IPR040632	Q	Sulfotransferase, S. mansonii-type	5	17	18	25	27
27	Phaeocystales	gain	IPR000961	T	AGC-kinase, C-terminal	5	32	20	37	44
27	Phaeocystales	gain	IPR002182	T	NB-ARC	2	7	12	11	5
27	Phaeocystales	gain	IPR013122	T	Polycystin cation channel, PKD1/PKD2	4	26	20	37	37
27	Phaeocystales	gain	IPR028325	T	Voltage-gated potassium channel	4	28	18	31	30
27	Phaeocystales	gain	IPR003961	W	Fibronectin type III	5	29	24	57	61
27	Phaeocystales	gain	IPR004263	W	Exostosin-like	6	78	66	95	73
27	Phaeocystales	gain	IPR005331	W	Sulfotransferase	11	76	72	76	55
27	Phaeocystales	gain	IPR037359	W	Heparan sulfate sulfotransferase	4	38	25	34	32
28	PSC	gain	IPR001660	A	Sterile alpha motif domain	19	34	24	45	50
28	PSC	gain	IPR000408	B	Regulator of chromosome condensation, RCC1	20	45	31	65	81
28	PSC	gain	IPR013121	C	Ferric reductase, NAD binding domain	6	7	4	4	11
28	PSC	gain	IPR013130	C	Ferric reductase transmembrane component-like domain	7	4	7	5	13
28	PSC	gain	IPR001173	G	Glycosyltransferase 2-like	9	16	16	24	30
28	PSC	gain	IPR001722	G	Glycoside hydrolase, family 7	5	1	4	10	11
28	PSC	gain	IPR003440	G	Glycosyl transferase, family 48	26	10	6	8	34
28	PSC	gain	IPR006102	G	Glycoside hydrolase, family 2, immunoglobulin-like beta-sandwich	9	8	5	8	15
28	PSC	gain	IPR006103	G	Glycoside hydrolase family 2, catalytic domain	8	11	9	16	20
28	PSC	gain	IPR006104	G	Glycosyl hydrolases family 2, sugar binding domain	6	7	5	11	14
28	PSC	gain	IPR008166	G	Glycosyltransferase family 92	5	0	2	4	7
28	PSC	gain	IPR026899	G	1,3-beta-glucan synthase subunit FKS1-like, domain-1	18	2	3	6	22
28	PSC	gain	IPR013830	I	SGNH hydrolase-type esterase domain	10	29	29	33	35
28	PSC	gain	IPR014030	I	Beta-ketoacyl synthase, N-terminal	11	11	16	19	27
28	PSC	gain	IPR001678	J	SAM-dependent methyltransferase RsmB/NOP2-type	9	11	12	22	26
28	PSC	gain	IPR041667	K	Cupin-like domain 8	24	45	44	79	80
28	PSC	gain	IPR041664	L	Orc1-like, AAA ATPase domain	5	1	3	1	9
28	PSC	gain	IPR000772	M	Ricin B, lectin domain	5	5	5	7	11
28	PSC	gain	IPR032861	M	Xylanase inhibitor, N-terminal	5	0	1	5	8
28	PSC	gain	IPR045053	M	Mannan endo-1,4-beta-mannosidase-like	8	3	5	6	12
28	PSC	gain	IPR004344	N	Tubulin-tyrosine ligase/Tubulin polyglutamylase	11	25	25	35	38
28	PSC	gain	IPR001254	O	Serine proteases, trypsin domain	16	9	10	10	29
28	PSC	gain	IPR002656	O	Acyltransferase 3 domain	7	4	4	12	14
28	PSC	gain	IPR006598	O	Glycosyl transferase CAP10 domain	13	30	34	52	43
28	PSC	gain	IPR019378	O	GDP-fucose protein O-fucosyltransferase	8	15	17	22	20
28	PSC	gain	IPR004481	P	Sodium/potassium/calcium exchanger	8	8	6	11	17
28	PSC	gain	IPR040632	Q	Sulfotransferase, S. mansonii-type	13	17	18	25	27
28	PSC	gain	IPR001452	R	SH3 domain	16	8	15	22	33
28	PSC	gain	IPR001466	R	Beta-lactamase-related	9	13	8	25	28
28	PSC	gain	IPR015353	R	Rubisco LSMT, substrate-binding domain	8	8	7	13	18
28	PSC	gain	IPR027815	R	10TM putative phosphate transporter, cytosolic domain	7	6	2	5	12
28	PSC	gain	IPR005046	S	Protein of unknown function DUF285	39	12	16	23	61
28	PSC	gain	IPR022099	S	Protein of unknown function DUF3638	9	3	4	13	17
28	PSC	gain	IPR022105	S	Protein of unknown function DUF3645	8	3	5	12	15
28	PSC	gain	IPR032808	S	DoxX family	4	8	3	2	7
28	PSC	gain	IPR000198	T	Rho GTPase-activating protein domain	7	8	10	13	14
28	PSC	gain	IPR000219	T	Dbl homology (DH) domain	7	8	13	23	17
28	PSC	gain	IPR000859	T	CUB domain	6	5	5	9	13
28	PSC	gain	IPR000909	T	Phosphatidylinositol-specific phospholipase C, X domain	9	12	8	16	21
28	PSC	gain	IPR000961	T	AGC-kinase, C-terminal	19	32	20	37	44
28	PSC	gain	IPR001192	T	Phosphoinositide phospholipase C family	11	15	9	16	25
28	PSC	gain	IPR001683	T	Phox homology	12	20	15	35	41
28	PSC	gain	IPR002073	T	3'5'-cyclic nucleotide phosphodiesterase, catalytic domain	8	11	7	14	19
28	PSC	gain	IPR002498	T	Phosphatidylinositol-4-phosphate 5-kinase, core	8	7	6	20	21
28	PSC	gain	IPR002859	T	PKD/REJ-like domain	5	3	5	7	11
28	PSC	gain	IPR003018	T	GAF domain	10	13	8	16	20
28	PSC	gain	IPR013105	T	Tetratricopeptide repeat 2	8	7	11	10	18
28	PSC	gain	IPR013111	T	EGF-like domain, extracellular	7	7	3	11	13
28	PSC	gain	IPR013122	T	Polycystin cation channel, PKD1/PKD2	15	26	20	37	37
28	PSC	gain	IPR016137	T	RGS domain	15	13	3	7	24
28	PSC	gain	IPR028325	T	Voltage-gated potassium channel	11	28	18	31	30
28	PSC	gain	IPR045122	T	Calcium permeable stress-gated cation channel 1-like	11	24	17	26	29
28	PSC	gain	IPR023362	U	PH-BEACH domain	6	3	1	6	11
28	PSC	gain	IPR026847	U	Vacuolar protein sorting-associated protein 13	10	10	5	17	24
28	PSC	gain	IPR003961	W	Fibronectin type III	28	29	24	57	61
28	PSC	gain	IPR005331	W	Sulfotransferase	15	76	72	76	55
28	PSC	gain	IPR013519	W	Integrin alpha beta-propellor	4	0	0	7	7
28	PSC	gain	IPR033078	W	Tenascin-C	6	15	5	15	16
28	PSC	gain	IPR037359	W	Heparan sulfate sulfotransferase	10	38	25	34	32
28	PSC	loss	IPR013584	A	RAP domain	11	21	11	15	5
28	PSC	loss	IPR000164	B	Histone H3/CENP-A	5	8	8	8	2
28	PSC	loss	IPR007125	B	Histone H2A/H2B/H3	10	26	24	13	6
28	PSC	loss	IPR002938	C	FAD-binding domain	10	41	13	24	11
28	PSC	loss	IPR008011	C	Complex 1 LYR protein	4	8	6	6	1
28	PSC	loss	IPR000217	N	Tubulin	7	18	17	11	6
28	PSC	loss	IPR018316	N	Tubulin/FtsZ, 2-layer sandwich domain	5	18	16	8	2
28	PSC	loss	IPR000626	O	Ubiquitin-like domain	13	72	67	78	41
28	PSC	loss	IPR011705	O	BTB/Kelch-associated	12	45	31	52	8
28	PSC	loss	IPR004014	P	Cation-transporting P-type ATPase, N-terminal	6	5	4	8	1
28	PSC	loss	IPR010865	S	Protein of unknown function DUF1499	5	10	7	8	1
28	PSC	loss	IPR001876	T	Zinc finger, RanBP2-type	5	11	8	13	2
28	PSC	loss	IPR000782	W	FAS1 domain	4	3	3	4	1

## Sheet: non-Phaeocystales
Supplementary Table S8, continued. Gene family evolution in other algae. Protein families found expanded (gain) or contracted (loss) by the evolution-informed maximum likelihood algorithm CAFE v4.0. Gains or losses per node were inferred based on terminal branch counts and their genetic distances from a multi-gene phylogeny constructed by PhyloFisher. KO groups were automatically or manually infe…
node #	node name	gain/loss	InterPro	KO group	Annotation	gains/losses per node
0	Coccomyxa	gain	IPR001360	G	Glycoside hydrolase family 1	6
0	Coccomyxa	gain	IPR001547	G	Glycoside hydrolase, family 5	15
0	Coccomyxa	gain	IPR002213	G	UDP-glucuronosyl/UDP-glucosyltransferase	4
0	Coccomyxa	gain	IPR002293	E	Amino acid/polyamine transporter I	8
0	Coccomyxa	gain	IPR004827	K	Basic-leucine zipper domain	9
0	Coccomyxa	gain	IPR006102	G	Glycoside hydrolase, family 2, immunoglobulin-like beta-sandwich	5
0	Coccomyxa	gain	IPR006104	G	Glycosyl hydrolases family 2, sugar binding domain	5
0	Coccomyxa	gain	IPR008160	W	Collagen triple helix repeat	6
0	Coccomyxa	gain	IPR009081	I	Phosphopantetheine binding ACP domain	8
0	Coccomyxa	gain	IPR013120	I	Male sterility, NAD-binding	5
0	Coccomyxa	gain	IPR013217	R	Methyltransferase type 12	5
0	Coccomyxa	gain	IPR013968	Q	Polyketide synthase, ketoreductase domain	6
0	Coccomyxa	gain	IPR014043	I	Acyl transferase	6
0	Coccomyxa	gain	IPR015914	R	Purple acid phosphatase, N-terminal	5
0	Coccomyxa	gain	IPR020807	Q	Polyketide synthase, dehydratase domain	8
0	Coccomyxa	gain	IPR025733	R	Iron/zinc purple acid phosphatase-like C-terminal domain	5
0	Coccomyxa	gain	IPR026057	I	PC-Esterase	7
0	Coccomyxa	gain	IPR029962	M	Trichome birefringence-like family	7
0	Coccomyxa	gain	IPR045053	M	Mannan endo-1,4-beta-mannosidase-like	8
0	Coccomyxa	loss	IPR001190	T	SRCR domain	10
0	Coccomyxa	loss	IPR001254	O	Serine proteases, trypsin domain	6
0	Coccomyxa	loss	IPR001283	W	Cysteine-rich secretory protein-related	4
0	Coccomyxa	loss	IPR001810	O	F-box domain	13
0	Coccomyxa	loss	IPR004333	K	SBP domain	9
0	Coccomyxa	loss	IPR005331	W	Sulfotransferase	4
0	Coccomyxa	loss	IPR006311	U	Twin-arginine translocation pathway, signal sequence	9
0	Coccomyxa	loss	IPR006598	O	Glycosyl transferase CAP10 domain	6
0	Coccomyxa	loss	IPR008752	O	Peptidase M11, gametolysin	9
0	Coccomyxa	loss	IPR011641	T	Tyrosine-protein kinase ephrin type A/B receptor-like	7
0	Coccomyxa	loss	IPR014044	O	CAP domain	5
0	Coccomyxa	loss	IPR043203	T	Voltage-gated cation channel calcium and sodium	4
0	Coccomyxa	loss	IPR044817	K	Squamosa promoter-binding-like protein	8
1		loss	IPR001300	T	Peptidase C2, calpain, catalytic domain	2
2	Chlorella	gain	IPR000757	G	Glycoside hydrolase family 16	6
2	Chlorella	gain	IPR000782	W	FAS1 domain	12
2	Chlorella	gain	IPR000868	E	Isochorismatase-like	5
2	Chlorella	gain	IPR001190	T	SRCR domain	8
2	Chlorella	gain	IPR001254	O	Serine proteases, trypsin domain	22
2	Chlorella	gain	IPR001320	E	Ionotropic glutamate receptor, C-terminal	3
2	Chlorella	gain	IPR001764	G	Glycoside hydrolase, family 3, N-terminal	3
2	Chlorella	gain	IPR001810	O	F-box domain	21
2	Chlorella	gain	IPR002044	G	Carbohydrate binding module family 20	8
2	Chlorella	gain	IPR002509	G	NodB homology domain	15
2	Chlorella	gain	IPR003961	W	Fibronectin type III	6
2	Chlorella	gain	IPR004333	K	SBP domain	23
2	Chlorella	gain	IPR005331	W	Sulfotransferase	7
2	Chlorella	gain	IPR007345	G	Polysaccharide pyruvyl transferase	8
2	Chlorella	gain	IPR007657	G	Glycosyltransferase 61	12
2	Chlorella	gain	IPR008752	O	Peptidase M11, gametolysin	8
2	Chlorella	gain	IPR011547	P	SLC26A/SulP transporter domain	5
2	Chlorella	gain	IPR011641	T	Tyrosine-protein kinase ephrin type A/B receptor-like	15
2	Chlorella	gain	IPR013057	E	Amino acid transporter, transmembrane domain	17
2	Chlorella	gain	IPR013830	I	SGNH hydrolase-type esterase domain	8
2	Chlorella	gain	IPR014044	O	CAP domain	6
2	Chlorella	gain	IPR018289	B	MULE transposase domain	8
2	Chlorella	gain	IPR018392	T	LysM domain	8
2	Chlorella	gain	IPR021134	P	Bestrophin/UPF0187	8
2	Chlorella	gain	IPR024535	G	Pectate lyase superfamily protein	15
2	Chlorella	gain	IPR044669	S	UPF0187 family	8
2	Chlorella	gain	IPR044817	K	Squamosa promoter-binding-like protein	16
3		gain	IPR000164	B	Histone H3/CENP-A	5
3		gain	IPR000558	B	Histone H2B	5
3		gain	IPR001128	C	Cytochrome P450	8
3		gain	IPR001190	T	SRCR domain	6
3		gain	IPR004263	W	Exostosin-like	7
3		gain	IPR004333	K	SBP domain	7
3		gain	IPR007125	B	Histone H2A/H2B/H3	13
3		gain	IPR008752	O	Peptidase M11, gametolysin	7
3		gain	IPR039606	H	Phytol/farnesol kinase	3
3		gain	IPR044817	K	Squamosa promoter-binding-like protein	8
3		loss	IPR008775	I	Phytanoyl-CoA dioxygenase	5
4	Chlre4	gain	IPR000014	T	PAS domain	10
4	Chlre4	gain	IPR000164	B	Histone H3/CENP-A	23
4	Chlre4	gain	IPR000558	B	Histone H2B	17
4	Chlre4	gain	IPR000772	M	Ricin B, lectin domain	3
4	Chlre4	gain	IPR001190	T	SRCR domain	27
4	Chlre4	gain	IPR001204	P	Phosphate transporter	8
4	Chlre4	gain	IPR001283	W	Cysteine-rich secretory protein-related	8
4	Chlre4	gain	IPR001304	M	C-type lectin-like	10
4	Chlre4	gain	IPR001425	C	Archaeal/bacterial/fungal rhodopsins	4
4	Chlre4	gain	IPR002073	T	3'5'-cyclic nucleotide phosphodiesterase, catalytic domain	22
4	Chlre4	gain	IPR002121	K	HRDC domain	3
4	Chlre4	gain	IPR002156	A	Ribonuclease H domain	10
4	Chlre4	gain	IPR002350	O	Kazal domain	6
4	Chlre4	gain	IPR002372	C	Pyrrolo-quinoline quinone repeat	9
4	Chlre4	gain	IPR002889	G	Carbohydrate-binding WSC	14
4	Chlre4	gain	IPR003440	G	Glycosyl transferase, family 48	6
4	Chlre4	gain	IPR003690	K	Transcription termination factor, mitochondrial/chloroplastic	6
4	Chlre4	gain	IPR004263	W	Exostosin-like	22
4	Chlre4	gain	IPR004273	Z	Dynein heavy chain region D6 P-loop domain	9
4	Chlre4	gain	IPR004333	K	SBP domain	11
4	Chlre4	gain	IPR004344	N	Tubulin-tyrosine ligase/Tubulin polyglutamylase	7
4	Chlre4	gain	IPR006311	U	Twin-arginine translocation pathway, signal sequence	10
4	Chlre4	gain	IPR006461	T	PLAC8 motif-containing protein	7
4	Chlre4	gain	IPR006598	O	Glycosyl transferase CAP10 domain	25
4	Chlre4	gain	IPR007125	B	Histone H2A/H2B/H3	57
4	Chlre4	gain	IPR008752	O	Peptidase M11, gametolysin	30
4	Chlre4	gain	IPR013122	T	Polycystin cation channel, PKD1/PKD2	8
4	Chlre4	gain	IPR013584	A	RAP domain	7
4	Chlre4	gain	IPR013602	Z	Dynein heavy chain, domain-2	8
4	Chlre4	gain	IPR013767	T	PAS fold	7
4	Chlre4	gain	IPR014044	O	CAP domain	7
4	Chlre4	gain	IPR020946	Q	Flavin monooxygenase-like	6
4	Chlre4	gain	IPR024317	Z	Dynein heavy chain, AAA module D4	8
4	Chlre4	gain	IPR024743	Z	Dynein heavy chain, coiled coil stalk	9
4	Chlre4	gain	IPR024862	R	Transient receptor potential cation channel subfamily V	9
4	Chlre4	gain	IPR025476	B	Helitron helicase-like domain	4
4	Chlre4	gain	IPR026899	G	1,3-beta-glucan synthase subunit FKS1-like, domain-1	3
4	Chlre4	gain	IPR030616	D	Aurora kinase	33
4	Chlre4	gain	IPR032454	B	Histone H2A, C-terminal domain	17
4	Chlre4	gain	IPR035425	B	CENP-T/Histone H4, histone fold	25
4	Chlre4	gain	IPR035699	Z	Dynein heavy chain, hydrolytic ATP-binding dynein motor region	9
4	Chlre4	gain	IPR035706	Z	Dynein heavy chain, ATP-binding dynein motor region	8
4	Chlre4	gain	IPR039123	O	Protein phosphatase 2C	12
4	Chlre4	gain	IPR039606	H	Phytol/farnesol kinase	64
4	Chlre4	gain	IPR039633	I	Plastid-lipid-associated protein	8
4	Chlre4	gain	IPR040632	Q	Sulfotransferase, S. mansonii-type	4
4	Chlre4	gain	IPR041228	Z	Dynein heavy chain, C-terminal domain	9
4	Chlre4	gain	IPR041466	Z	Dynein heavy chain, AAA 5 extension domain	7
4	Chlre4	gain	IPR041589	Z	Dynein heavy chain 3, AAA+ lid domain	8
4	Chlre4	gain	IPR041658	Z	Dynein heavy chain AAA lid domain	9
4	Chlre4	gain	IPR043533	T	Cyclic nucleotide-binding domain-containing protein 1/2	5
4	Chlre4	gain	IPR044607	K	Transcription factor RKD-like	8
4	Chlre4	gain	IPR044817	K	Squamosa promoter-binding-like protein	13
4	Chlre4	loss	IPR002885	A	Pentatricopeptide repeat	9
4	Chlre4	loss	IPR003406	G	Glycosyl transferase, family 14	4
4	Chlre4	loss	IPR013057	E	Amino acid transporter, transmembrane domain	9
5		gain	IPR004333	K	SBP domain	4
5		gain	IPR044817	K	Squamosa promoter-binding-like protein	3
5		gain	IPR045053	M	Mannan endo-1,4-beta-mannosidase-like	3
5		loss	IPR007632	P	Anoctamin	5
5		loss	IPR012317	F	Poly(ADP-ribose) polymerase, catalytic domain	5
5		loss	IPR023780	B	Chromo domain	7
6	MicpuC3	gain	IPR000261	T	EH domain	5
6	MicpuC3	gain	IPR001356	K	Homeobox domain	7
6	MicpuC3	gain	IPR001660	A	Sterile alpha motif domain	5
6	MicpuC3	gain	IPR001876	T	Zinc finger, RanBP2-type	4
6	MicpuC3	gain	IPR002859	T	PKD/REJ-like domain	8
6	MicpuC3	gain	IPR003034	R	SAP domain	12
6	MicpuC3	gain	IPR004088	A	K Homology domain, type 1	10
6	MicpuC3	gain	IPR004273	Z	Dynein heavy chain region D6 P-loop domain	7
6	MicpuC3	gain	IPR006311	U	Twin-arginine translocation pathway, signal sequence	10
6	MicpuC3	gain	IPR013517	W	FG-GAP repeat	4
6	MicpuC3	gain	IPR013602	Z	Dynein heavy chain, domain-2	6
6	MicpuC3	gain	IPR024317	Z	Dynein heavy chain, AAA module D4	6
6	MicpuC3	gain	IPR024743	Z	Dynein heavy chain, coiled coil stalk	6
6	MicpuC3	gain	IPR025487	S	Probable Zinc-ribbon domain	28
6	MicpuC3	gain	IPR026983	Z	Dynein heavy chain	4
6	MicpuC3	gain	IPR035699	Z	Dynein heavy chain, hydrolytic ATP-binding dynein motor region	6
6	MicpuC3	gain	IPR035706	Z	Dynein heavy chain, ATP-binding dynein motor region	6
6	MicpuC3	gain	IPR041228	Z	Dynein heavy chain, C-terminal domain	6
6	MicpuC3	gain	IPR041466	Z	Dynein heavy chain, AAA 5 extension domain	6
6	MicpuC3	gain	IPR041589	Z	Dynein heavy chain 3, AAA+ lid domain	6
6	MicpuC3	gain	IPR041658	Z	Dynein heavy chain AAA lid domain	6
6	MicpuC3	gain	IPR041664	L	Orc1-like, AAA ATPase domain	3
7		gain	IPR005046	S	Protein of unknown function DUF285	4
7		gain	IPR025487	S	Probable Zinc-ribbon domain	3
7		loss	IPR001190	T	SRCR domain	4
7		loss	IPR007657	G	Glycosyltransferase 61	6
8	Oluci	loss	IPR000209	O	Peptidase S8/S53 domain	5
8	Oluci	loss	IPR000626	O	Ubiquitin-like domain	10
8	Oluci	loss	IPR001660	A	Sterile alpha motif domain	5
8	Oluci	loss	IPR001810	O	F-box domain	10
8	Oluci	loss	IPR002044	G	Carbohydrate binding module family 20	6
8	Oluci	loss	IPR004344	N	Tubulin-tyrosine ligase/Tubulin polyglutamylase	4
8	Oluci	loss	IPR006311	U	Twin-arginine translocation pathway, signal sequence	7
8	Oluci	loss	IPR013602	Z	Dynein heavy chain, domain-2	5
8	Oluci	loss	IPR020422	O	Dual specificity protein phosphatase domain	5
8	Oluci	loss	IPR024317	Z	Dynein heavy chain, AAA module D4	5
8	Oluci	loss	IPR024743	Z	Dynein heavy chain, coiled coil stalk	5
8	Oluci	loss	IPR025487	S	Probable Zinc-ribbon domain	4
8	Oluci	loss	IPR035699	Z	Dynein heavy chain, hydrolytic ATP-binding dynein motor region	5
8	Oluci	loss	IPR035706	Z	Dynein heavy chain, ATP-binding dynein motor region	5
8	Oluci	loss	IPR041228	Z	Dynein heavy chain, C-terminal domain	5
8	Oluci	loss	IPR041658	Z	Dynein heavy chain AAA lid domain	5
10	Guith1	gain	IPR000014	T	PAS domain	22
10	Guith1	gain	IPR000157	T	Toll/interleukin-1 receptor homology (TIR) domain	8
10	Guith1	gain	IPR000253	R	Forkhead-associated (FHA) domain	23
10	Guith1	gain	IPR000340	O	Dual specificity phosphatase, catalytic domain	41
10	Guith1	gain	IPR000387	O	Tyrosine-specific protein phosphatases domain	50
10	Guith1	gain	IPR000408	B	Regulator of chromosome condensation, RCC1	51
10	Guith1	gain	IPR000421	T	Coagulation factor 5/8 C-terminal domain	12
10	Guith1	gain	IPR000436	R	Sushi/SCR/CCP domain	11
10	Guith1	gain	IPR000569	O	HECT domain	14
10	Guith1	gain	IPR000768	O	NAD:arginine ADP-ribosyltransferase, ART	11
10	Guith1	gain	IPR000859	T	CUB domain	15
10	Guith1	gain	IPR001138	K	Zn(2)Cys(6) fungal-type DNA-binding domain	81
10	Guith1	gain	IPR001179	O	FKBP-type peptidyl-prolyl cis-trans isomerase domain	19
10	Guith1	gain	IPR001190	T	SRCR domain	11
10	Guith1	gain	IPR001296	G	Glycosyl transferase, family 1	13
10	Guith1	gain	IPR001304	M	C-type lectin-like	9
10	Guith1	gain	IPR001320	E	Ionotropic glutamate receptor, C-terminal	6
10	Guith1	gain	IPR001368	T	TNFR/NGFR cysteine-rich region	35
10	Guith1	gain	IPR001425	C	Archaeal/bacterial/fungal rhodopsins	38
10	Guith1	gain	IPR001440	T	Tetratricopeptide repeat 1	14
10	Guith1	gain	IPR001452	R	SH3 domain	12
10	Guith1	gain	IPR001461	O	Aspartic peptidase A1 family	11
10	Guith1	gain	IPR001660	A	Sterile alpha motif domain	36
10	Guith1	gain	IPR001683	T	Phox homology	20
10	Guith1	gain	IPR001715	Z	Calponin homology domain	13
10	Guith1	gain	IPR001932	T	PPM-type phosphatase-like domain	23
10	Guith1	gain	IPR002044	G	Carbohydrate binding module family 20	12
10	Guith1	gain	IPR002068	O	Alpha crystallin/Hsp20 domain	9
10	Guith1	gain	IPR002859	T	PKD/REJ-like domain	11
10	Guith1	gain	IPR002867	O	IBR domain	11
10	Guith1	gain	IPR003018	T	GAF domain	9
10	Guith1	gain	IPR003137	O	PA domain	14
10	Guith1	gain	IPR003140	I	Phospholipase/carboxylesterase/thioesterase	10
10	Guith1	gain	IPR003661	T	Signal transduction histidine kinase, dimerisation/phosphoacceptor domain	8
10	Guith1	gain	IPR003877	S	SPRY domain	19
10	Guith1	gain	IPR003961	W	Fibronectin type III	21
10	Guith1	gain	IPR004166	O	MHCK/EF2 kinase	19
10	Guith1	gain	IPR004273	Z	Dynein heavy chain region D6 P-loop domain	18
10	Guith1	gain	IPR004344	N	Tubulin-tyrosine ligase/Tubulin polyglutamylase	24
10	Guith1	gain	IPR006600	B	HTH CenpB-type DNA-binding domain	22
10	Guith1	gain	IPR006652	R	Kelch repeat type 1	20
10	Guith1	gain	IPR008160	W	Collagen triple helix repeat	53
10	Guith1	gain	IPR009071	K	High mobility group box domain	17
10	Guith1	gain	IPR011598	K	Myc-type, basic helix-loop-helix (bHLH) domain	11
10	Guith1	gain	IPR011641	T	Tyrosine-protein kinase ephrin type A/B receptor-like	83
10	Guith1	gain	IPR011705	O	BTB/Kelch-associated	9
10	Guith1	gain	IPR012317	F	Poly(ADP-ribose) polymerase, catalytic domain	17
10	Guith1	gain	IPR013017	T	NHL repeat, subgroup	7
10	Guith1	gain	IPR013099	P	Potassium channel domain	32
10	Guith1	gain	IPR013105	T	Tetratricopeptide repeat 2	17
10	Guith1	gain	IPR013122	T	Polycystin cation channel, PKD1/PKD2	45
10	Guith1	gain	IPR013594	Z	Dynein heavy chain, domain-1	12
10	Guith1	gain	IPR013602	Z	Dynein heavy chain, domain-2	23
10	Guith1	gain	IPR017868	Z	Filamin/ABP280 repeat-like	23
10	Guith1	gain	IPR018392	T	LysM domain	44
10	Guith1	gain	IPR019410	O	Lysine methyltransferase	26
10	Guith1	gain	IPR020422	O	Dual specificity protein phosphatase domain	34
10	Guith1	gain	IPR023561	G	Carbonic anhydrase, alpha-class	11
10	Guith1	gain	IPR024041	P	Ammonium transporter AmtB-like domain	19
10	Guith1	gain	IPR024317	Z	Dynein heavy chain, AAA module D4	19
10	Guith1	gain	IPR024743	Z	Dynein heavy chain, coiled coil stalk	18
10	Guith1	gain	IPR024977	D	Anaphase-promoting complex subunit 4, WD40 domain	12
10	Guith1	gain	IPR025197	O	Domain of unknown function DUF4116	6
10	Guith1	gain	IPR025875	R	Leucine rich repeat 4	10
10	Guith1	gain	IPR027640	Z	Kinesin-like protein	18
10	Guith1	gain	IPR028325	T	Voltage-gated potassium channel	9
10	Guith1	gain	IPR029023	T	Tensin-type phosphatase domain	17
10	Guith1	gain	IPR029489	O	O-GlcNAc transferase, C-terminal	57
10	Guith1	gain	IPR029526	B	PiggyBac transposable element-derived protein	10
10	Guith1	gain	IPR031127	O	E3 ubiquitin ligase RBR family	13
10	Guith1	gain	IPR033121	O	Peptidase family A1 domain	15
10	Guith1	gain	IPR035699	Z	Dynein heavy chain, hydrolytic ATP-binding dynein motor region	22
10	Guith1	gain	IPR035706	Z	Dynein heavy chain, ATP-binding dynein motor region	21
10	Guith1	gain	IPR037524	M	PA14/GLEYA domain	15
10	Guith1	gain	IPR037919	O	UDP-N-acetylglucosamine--peptide N-acetylglucosaminyltransferase 110kDa subunit	44
10	Guith1	gain	IPR039448	R	Right handed beta helix domain	37
10	Guith1	gain	IPR040626	O	Cytosolic carboxypeptidase, N-terminal	8
10	Guith1	gain	IPR041228	Z	Dynein heavy chain, C-terminal domain	19
10	Guith1	gain	IPR041466	Z	Dynein heavy chain, AAA 5 extension domain	21
10	Guith1	gain	IPR041589	Z	Dynein heavy chain 3, AAA+ lid domain	17
10	Guith1	gain	IPR041658	Z	Dynein heavy chain AAA lid domain	18
10	Guith1	gain	IPR043203	T	Voltage-gated cation channel calcium and sodium	80
10	Guith1	gain	IPR044066	O	TRIAD supradomain	12
10	Guith1	gain	IPR044607	K	Transcription factor RKD-like	26
10	Guith1	gain	IPR044801	Z	Filamin family	7
10	Guith1	gain	IPR045052	U	Copine	7
10	Guith1	gain	IPR045156	U	Vacuolar protein 8	14
12	Grach	gain	IPR001173	G	Glycosyltransferase 2-like	10
12	Grach	gain	IPR001254	O	Serine proteases, trypsin domain	12
12	Grach	gain	IPR001767	T	Hedgehog protein, Hint domain	21
12	Grach	gain	IPR002035	W	von Willebrand factor, type A	29
12	Grach	gain	IPR002182	T	NB-ARC	23
12	Grach	gain	IPR002575	Q	Aminoglycoside phosphotransferase	13
12	Grach	gain	IPR004302	M	Cellulose/chitin-binding protein, N-terminal	7
12	Grach	gain	IPR004827	K	Basic-leucine zipper domain	13
12	Grach	gain	IPR004875	B	DDE superfamily endonuclease domain	25
12	Grach	gain	IPR006600	B	HTH CenpB-type DNA-binding domain	9
12	Grach	gain	IPR008906	B	HAT, C-terminal dimerisation domain	5
12	Grach	gain	IPR009465	R	Spondin, N-terminal	15
12	Grach	gain	IPR011598	K	Myc-type, basic helix-loop-helix (bHLH) domain	7
12	Grach	gain	IPR011706	C	Multicopper oxidase, type 2	5
12	Grach	gain	IPR012938	G	Glucose/Sorbosone dehydrogenase	7
12	Grach	gain	IPR019791	C	Haem peroxidase, animal-type	25
12	Grach	gain	IPR024983	O	CHAT domain	5
12	Grach	gain	IPR027806	B	Harbinger transposase-derived nuclease domain	14
12	Grach	loss	IPR005828	G	Major facilitator, sugar transporter-like	10
12	Grach	loss	IPR013057	E	Amino acid transporter, transmembrane domain	8
12	Grach	loss	IPR019410	O	Lysine methyltransferase	8
12	Grach	loss	IPR038717	B	Tc1-like transposase, DDE domain	5
13		gain	IPR001767	T	Hedgehog protein, Hint domain	5
13		loss	IPR005828	G	Major facilitator, sugar transporter-like	5
14	Porpu2	gain	IPR000261	T	EH domain	14
14	Porpu2	gain	IPR000313	R	PWWP domain	13
14	Porpu2	gain	IPR001204	P	Phosphate transporter	7
14	Porpu2	gain	IPR001767	T	Hedgehog protein, Hint domain	13
14	Porpu2	gain	IPR002579	O	Peptide methionine sulphoxide reductase MrsB domain	7
14	Porpu2	gain	IPR002656	O	Acyltransferase 3 domain	8
14	Porpu2	gain	IPR002921	I	Fungal lipase-like domain	13
14	Porpu2	gain	IPR005046	S	Protein of unknown function DUF285	11
14	Porpu2	gain	IPR005331	W	Sulfotransferase	9
14	Porpu2	gain	IPR008166	G	Glycosyltransferase family 92	11
14	Porpu2	gain	IPR013087	K	Zinc finger C2H2-type	16
14	Porpu2	gain	IPR018011	W	Carbohydrate sulfotransferase 8-10	11
14	Porpu2	gain	IPR025724	B	GAG-pre-integrase domain	29
14	Porpu2	gain	IPR032567	B	LDOC1-related	55
14	Porpu2	gain	IPR038717	B	Tc1-like transposase, DDE domain	74
14	Porpu2	gain	IPR045052	U	Copine	8
15		gain	IPR001767	T	Hedgehog protein, Hint domain	8
15		gain	IPR004827	K	Basic-leucine zipper domain	7
15		loss	IPR000014	T	PAS domain	6
15		loss	IPR000253	R	Forkhead-associated (FHA) domain	8
15		loss	IPR000306	R	FYVE zinc finger	4
15		loss	IPR000340	O	Dual specificity phosphatase, catalytic domain	8
15		loss	IPR000408	B	Regulator of chromosome condensation, RCC1	13
15		loss	IPR000668	O	Peptidase C1A, papain C-terminal	9
15		loss	IPR001300	T	Peptidase C2, calpain, catalytic domain	7
15		loss	IPR001563	O	Peptidase S10, serine carboxypeptidase	5
15		loss	IPR001683	T	Phox homology	6
15		loss	IPR001932	T	PPM-type phosphatase-like domain	10
15		loss	IPR002073	T	3'5'-cyclic nucleotide phosphodiesterase, catalytic domain	7
15		loss	IPR003034	R	SAP domain	8
15		loss	IPR003582	O	ShKT domain	5
15		loss	IPR003661	T	Signal transduction histidine kinase, dimerisation/phosphoacceptor domain	4
15		loss	IPR003961	W	Fibronectin type III	5
15		loss	IPR004273	Z	Dynein heavy chain region D6 P-loop domain	7
15		loss	IPR004344	N	Tubulin-tyrosine ligase/Tubulin polyglutamylase	9
15		loss	IPR007052	R	CS domain	7
15		loss	IPR007603	I	Choline transporter-like	4
15		loss	IPR008775	I	Phytanoyl-CoA dioxygenase	7
15		loss	IPR009071	K	High mobility group box domain	10
15		loss	IPR011641	T	Tyrosine-protein kinase ephrin type A/B receptor-like	6
15		loss	IPR012317	F	Poly(ADP-ribose) polymerase, catalytic domain	5
15		loss	IPR013122	T	Polycystin cation channel, PKD1/PKD2	6
15		loss	IPR013201	O	Cathepsin propeptide inhibitor domain (I29)	4
15		loss	IPR013584	A	RAP domain	8
15		loss	IPR013594	Z	Dynein heavy chain, domain-1	4
15		loss	IPR013602	Z	Dynein heavy chain, domain-2	8
15		loss	IPR014030	I	Beta-ketoacyl synthase, N-terminal	6
15		loss	IPR017868	Z	Filamin/ABP280 repeat-like	5
15		loss	IPR018392	T	LysM domain	4
15		loss	IPR018997	O	PUB domain	5
15		loss	IPR019410	O	Lysine methyltransferase	10
15		loss	IPR024317	Z	Dynein heavy chain, AAA module D4	7
15		loss	IPR024743	Z	Dynein heavy chain, coiled coil stalk	7
15		loss	IPR024862	R	Transient receptor potential cation channel subfamily V	4
15		loss	IPR027640	Z	Kinesin-like protein	13
15		loss	IPR031127	O	E3 ubiquitin ligase RBR family	5
15		loss	IPR035699	Z	Dynein heavy chain, hydrolytic ATP-binding dynein motor region	7
15		loss	IPR035706	Z	Dynein heavy chain, ATP-binding dynein motor region	7
15		loss	IPR039448	R	Right handed beta helix domain	4
15		loss	IPR041228	Z	Dynein heavy chain, C-terminal domain	7
15		loss	IPR041466	Z	Dynein heavy chain, AAA 5 extension domain	7
15		loss	IPR041589	Z	Dynein heavy chain 3, AAA+ lid domain	6
15		loss	IPR041658	Z	Dynein heavy chain AAA lid domain	7
15		loss	IPR041667	K	Cupin-like domain 8	8
15		loss	IPR043203	T	Voltage-gated cation channel calcium and sodium	8
15		loss	IPR044066	O	TRIAD supradomain	5
15		loss	IPR045054	O	Prolyl 4-hydroxylase	9
16	Galsu	gain	IPR005828	G	Major facilitator, sugar transporter-like	50
16	Galsu	gain	IPR007312	I	Phosphoesterase	4
16	Galsu	loss	IPR000209	O	Peptidase S8/S53 domain	7
16	Galsu	loss	IPR001254	O	Serine proteases, trypsin domain	6
16	Galsu	loss	IPR002921	I	Fungal lipase-like domain	10
16	Galsu	loss	IPR005331	W	Sulfotransferase	8
16	Galsu	loss	IPR006311	U	Twin-arginine translocation pathway, signal sequence	7
16	Galsu	loss	IPR021134	P	Bestrophin/UPF0187	7
18	Chrpa1	gain	IPR000203	T	GPS motif	6
18	Chrpa1	gain	IPR000768	O	NAD:arginine ADP-ribosyltransferase, ART	14
18	Chrpa1	gain	IPR000772	M	Ricin B, lectin domain	6
18	Chrpa1	gain	IPR000782	W	FAS1 domain	13
18	Chrpa1	gain	IPR001683	T	Phox homology	11
18	Chrpa1	gain	IPR001767	T	Hedgehog protein, Hint domain	9
18	Chrpa1	gain	IPR003034	R	SAP domain	15
18	Chrpa1	gain	IPR003280	P	Two pore domain potassium channel	12
18	Chrpa1	gain	IPR003323	O	OTU domain	21
18	Chrpa1	gain	IPR003540	O	ADP ribosyltransferase	9
18	Chrpa1	gain	IPR004166	O	MHCK/EF2 kinase	5
18	Chrpa1	gain	IPR004344	N	Tubulin-tyrosine ligase/Tubulin polyglutamylase	15
18	Chrpa1	gain	IPR007111	T	NACHT nucleoside triphosphatase	20
18	Chrpa1	gain	IPR007312	I	Phosphoesterase	7
18	Chrpa1	gain	IPR007632	P	Anoctamin	9
18	Chrpa1	gain	IPR008884	Q	Macrocin-O-methyltransferase	8
18	Chrpa1	gain	IPR010736	R	Sperm-tail PG-rich repeat	11
18	Chrpa1	gain	IPR012317	F	Poly(ADP-ribose) polymerase, catalytic domain	23
18	Chrpa1	gain	IPR012668	S	Conserved hypothetical protein CHP02466	6
18	Chrpa1	gain	IPR013087	K	Zinc finger C2H2-type	6
18	Chrpa1	gain	IPR013099	P	Potassium channel domain	17
18	Chrpa1	gain	IPR013211	S	LVIVD	10
18	Chrpa1	gain	IPR013517	W	FG-GAP repeat	41
18	Chrpa1	gain	IPR013594	Z	Dynein heavy chain, domain-1	8
18	Chrpa1	gain	IPR015914	R	Purple acid phosphatase, N-terminal	4
18	Chrpa1	gain	IPR015940	R	Ubiquitin-associated domain	29
18	Chrpa1	gain	IPR017868	Z	Filamin/ABP280 repeat-like	62
18	Chrpa1	gain	IPR025306	R	Probable zinc-binding domain	5
18	Chrpa1	gain	IPR027640	Z	Kinesin-like protein	19
18	Chrpa1	gain	IPR031649	T	Voltage-dependent L-type calcium channel, IQ-associated domain	7
18	Chrpa1	gain	IPR035699	Z	Dynein heavy chain, hydrolytic ATP-binding dynein motor region	9
18	Chrpa1	gain	IPR035706	Z	Dynein heavy chain, ATP-binding dynein motor region	9
18	Chrpa1	gain	IPR040626	O	Cytosolic carboxypeptidase, N-terminal	5
18	Chrpa1	gain	IPR041466	Z	Dynein heavy chain, AAA 5 extension domain	7
18	Chrpa1	gain	IPR043203	T	Voltage-gated cation channel calcium and sodium	34
18	Chrpa1	gain	IPR044801	Z	Filamin family	43
18	Chrpa1	gain	IPR045156	U	Vacuolar protein 8	13
18	Chrpa1	loss	IPR000863	P	Sulfotransferase domain	11
18	Chrpa1	loss	IPR000909	T	Phosphatidylinositol-specific phospholipase C, X domain	9
18	Chrpa1	loss	IPR001192	T	Phosphoinositide phospholipase C family	10
18	Chrpa1	loss	IPR001223	G	Glycoside hydrolase family 18, catalytic domain	7
18	Chrpa1	loss	IPR001254	O	Serine proteases, trypsin domain	12
18	Chrpa1	loss	IPR001711	T	Phospholipase C, phosphatidylinositol-specific, Y domain	8
18	Chrpa1	loss	IPR001810	O	F-box domain	15
18	Chrpa1	loss	IPR001828	T	Receptor, ligand binding region	5
18	Chrpa1	loss	IPR003392	T	Protein patched/dispatched	9
18	Chrpa1	loss	IPR005046	S	Protein of unknown function DUF285	19
18	Chrpa1	loss	IPR005331	W	Sulfotransferase	18
18	Chrpa1	loss	IPR005828	G	Major facilitator, sugar transporter-like	12
18	Chrpa1	loss	IPR006202	T	Neurotransmitter-gated ion-channel ligand-binding domain	6
18	Chrpa1	loss	IPR006311	U	Twin-arginine translocation pathway, signal sequence	9
18	Chrpa1	loss	IPR013584	A	RAP domain	11
18	Chrpa1	loss	IPR013830	I	SGNH hydrolase-type esterase domain	9
18	Chrpa1	loss	IPR017441	T	Protein kinase, ATP binding site	9
18	Chrpa1	loss	IPR018011	W	Carbohydrate sulfotransferase 8-10	4
18	Chrpa1	loss	IPR018316	N	Tubulin/FtsZ, 2-layer sandwich domain	5
18	Chrpa1	loss	IPR028325	T	Voltage-gated potassium channel	9
18	Chrpa1	loss	IPR037359	W	Heparan sulfate sulfotransferase	10
18	Chrpa1	loss	IPR039367	O	Initiation-specific alpha-1,6-mannosyltransferase Och1-like	4
18	Chrpa1	loss	IPR039421	R	Type I protein exporter	9
18	Chrpa1	loss	IPR044772	P	Nitrate transporter	4
19		gain	IPR044808	K	Ethylene-responsive transcription factor	4
20	Emihu1	gain	IPR000073	R	Alpha/beta hydrolase fold-1	18
20	Emihu1	gain	IPR000086	R	NUDIX hydrolase domain	13
20	Emihu1	gain	IPR000157	T	Toll/interleukin-1 receptor homology (TIR) domain	30
20	Emihu1	gain	IPR000164	B	Histone H3/CENP-A	15
20	Emihu1	gain	IPR000182	R	GNAT domain	18
20	Emihu1	gain	IPR000209	O	Peptidase S8/S53 domain	14
20	Emihu1	gain	IPR000217	N	Tubulin	13
20	Emihu1	gain	IPR000253	R	Forkhead-associated (FHA) domain	24
20	Emihu1	gain	IPR000269	E	Copper amine oxidase	4
20	Emihu1	gain	IPR000330	K	SNF2, N-terminal	22
20	Emihu1	gain	IPR000421	T	Coagulation factor 5/8 C-terminal domain	9
20	Emihu1	gain	IPR000558	B	Histone H2B	4
20	Emihu1	gain	IPR000608	O	Ubiquitin-conjugating enzyme E2	14
20	Emihu1	gain	IPR000620	R	EamA domain	16
20	Emihu1	gain	IPR000868	E	Isochorismatase-like	14
20	Emihu1	gain	IPR000873	I	AMP-dependent synthetase/ligase domain	21
20	Emihu1	gain	IPR000909	T	Phosphatidylinositol-specific phospholipase C, X domain	8
20	Emihu1	gain	IPR000998	W	MAM domain	22
20	Emihu1	gain	IPR001128	C	Cytochrome P450	11
20	Emihu1	gain	IPR001138	K	Zn(2)Cys(6) fungal-type DNA-binding domain	6
20	Emihu1	gain	IPR001173	G	Glycosyltransferase 2-like	11
20	Emihu1	gain	IPR001192	T	Phosphoinositide phospholipase C family	12
20	Emihu1	gain	IPR001204	P	Phosphate transporter	8
20	Emihu1	gain	IPR001254	O	Serine proteases, trypsin domain	22
20	Emihu1	gain	IPR001360	G	Glycoside hydrolase family 1	6
20	Emihu1	gain	IPR001509	G	NAD-dependent epimerase/dehydratase	11
20	Emihu1	gain	IPR001646	R	Pentapeptide repeat	72
20	Emihu1	gain	IPR001711	T	Phospholipase C, phosphatidylinositol-specific, Y domain	9
20	Emihu1	gain	IPR001715	Z	Calponin homology domain	11
20	Emihu1	gain	IPR001734	P	Sodium/solute symporter	7
20	Emihu1	gain	IPR001767	T	Hedgehog protein, Hint domain	7
20	Emihu1	gain	IPR001810	O	F-box domain	25
20	Emihu1	gain	IPR001828	T	Receptor, ligand binding region	16
20	Emihu1	gain	IPR001926	E	Tryptophan synthase beta chain-like, PALP domain	12
20	Emihu1	gain	IPR002018	I	Carboxylesterase, type B	9
20	Emihu1	gain	IPR002059	K	Cold-shock protein, DNA-binding	9
20	Emihu1	gain	IPR002121	K	HRDC domain	14
20	Emihu1	gain	IPR002130	O	Cyclophilin-type peptidyl-prolyl cis-trans isomerase domain	17
20	Emihu1	gain	IPR002156	A	Ribonuclease H domain	12
20	Emihu1	gain	IPR002213	G	UDP-glucuronosyl/UDP-glucosyltransferase	10
20	Emihu1	gain	IPR002227	Q	Tyrosinase copper-binding domain	8
20	Emihu1	gain	IPR002372	C	Pyrrolo-quinoline quinone repeat	6
20	Emihu1	gain	IPR002528	Q	Multi antimicrobial extrusion protein	14
20	Emihu1	gain	IPR002857	B	Zinc finger, CXXC-type	8
20	Emihu1	gain	IPR002921	I	Fungal lipase-like domain	12
20	Emihu1	gain	IPR002938	C	FAD-binding domain	18
20	Emihu1	gain	IPR003008	N	Tubulin/FtsZ, GTPase domain	10
20	Emihu1	gain	IPR003689	P	Zinc/iron permease	8
20	Emihu1	gain	IPR003819	P	TauD/TfdA-like domain	27
20	Emihu1	gain	IPR004000	Z	Actin family	18
20	Emihu1	gain	IPR004014	P	Cation-transporting P-type ATPase, N-terminal	6
20	Emihu1	gain	IPR004045	R	Glutathione S-transferase, N-terminal	22
20	Emihu1	gain	IPR004046	R	Glutathione S-transferase, C-terminal	10
20	Emihu1	gain	IPR004302	M	Cellulose/chitin-binding protein, N-terminal	7
20	Emihu1	gain	IPR004304	E	Acetamidase/Formamidase	11
20	Emihu1	gain	IPR004839	E	Aminotransferase, class I/classII	13
20	Emihu1	gain	IPR004869	R	Membrane transport protein MMPL domain	11
20	Emihu1	gain	IPR005025	R	NADPH-dependent FMN reductase-like	5
20	Emihu1	gain	IPR005046	S	Protein of unknown function DUF285	19
20	Emihu1	gain	IPR005645	R	Serine hydrolase FSH	14
20	Emihu1	gain	IPR005804	I	Fatty acid desaturase domain	11
20	Emihu1	gain	IPR006043	H	Xanthine/uracil/vitamin C permease	6
20	Emihu1	gain	IPR006094	C	FAD linked oxidase, N-terminal	12
20	Emihu1	gain	IPR006201	T	Neurotransmitter-gated ion-channel	14
20	Emihu1	gain	IPR006202	T	Neurotransmitter-gated ion-channel ligand-binding domain	11
20	Emihu1	gain	IPR006311	U	Twin-arginine translocation pathway, signal sequence	16
20	Emihu1	gain	IPR006330	F	Adenosine/adenine deaminase	5
20	Emihu1	gain	IPR006935	L	Helicase/UvrB, N-terminal	6
20	Emihu1	gain	IPR007125	B	Histone H2A/H2B/H3	20
20	Emihu1	gain	IPR007130	I	Diacylglycerol acyltransferase	8
20	Emihu1	gain	IPR007248	U	Mpv17/PMP22	25
20	Emihu1	gain	IPR007271	G	Nucleotide-sugar transporter	11
20	Emihu1	gain	IPR008906	B	HAT, C-terminal dimerisation domain	5
20	Emihu1	gain	IPR009056	C	Cytochrome c-like domain	8
20	Emihu1	gain	IPR010869	S	Protein of unknown function DUF1501	8
20	Emihu1	gain	IPR010987	R	Glutathione S-transferase, C-terminal-like	11
20	Emihu1	gain	IPR011527	R	ABC transporter type 1, transmembrane domain	15
20	Emihu1	gain	IPR011629	H	Cobalamin (vitamin B12) biosynthesis CobW-like, C-terminal	9
20	Emihu1	gain	IPR011706	C	Multicopper oxidase, type 2	4
20	Emihu1	gain	IPR011707	C	Multicopper oxidase, type 3	9
20	Emihu1	gain	IPR013057	E	Amino acid transporter, transmembrane domain	32
20	Emihu1	gain	IPR013094	R	Alpha/beta hydrolase fold-3	11
20	Emihu1	gain	IPR013216	R	Methyltransferase type 11	13
20	Emihu1	gain	IPR013217	R	Methyltransferase type 12	8
20	Emihu1	gain	IPR013584	A	RAP domain	56
20	Emihu1	gain	IPR013658	R	SMP-30/Gluconolactonase/LRE-like region	17
20	Emihu1	gain	IPR013819	I	Lipoxygenase, C-terminal	8
20	Emihu1	gain	IPR013968	Q	Polyketide synthase, ketoreductase domain	18
20	Emihu1	gain	IPR014917	S	Protein of unknown function DUF1800	6
20	Emihu1	gain	IPR015798	E	Copper amine oxidase, catalytic domain	4
20	Emihu1	gain	IPR016166	C	FAD-binding domain, PCMH-type	17
20	Emihu1	gain	IPR017441	T	Protein kinase, ATP binding site	18
20	Emihu1	gain	IPR017941	C	Rieske [2Fe-2S] iron-sulphur domain	11
20	Emihu1	gain	IPR018316	N	Tubulin/FtsZ, 2-layer sandwich domain	11
20	Emihu1	gain	IPR019405	G	Lactonase, 7-bladed beta propeller	20
20	Emihu1	gain	IPR019791	C	Haem peroxidase, animal-type	4
20	Emihu1	gain	IPR020807	Q	Polyketide synthase, dehydratase domain	22
20	Emihu1	gain	IPR020946	Q	Flavin monooxygenase-like	9
20	Emihu1	gain	IPR023210	R	NADP-dependent oxidoreductase domain	16
20	Emihu1	gain	IPR023631	E	Amidase signature domain	6
20	Emihu1	gain	IPR023780	B	Chromo domain	14
20	Emihu1	gain	IPR024041	P	Ammonium transporter AmtB-like domain	15
20	Emihu1	gain	IPR025475	S	Protein of unknown function DUF4326)	7
20	Emihu1	gain	IPR025476	B	Helitron helicase-like domain	4
20	Emihu1	gain	IPR026992	R	Non-haem dioxygenase N-terminal domain	12
20	Emihu1	gain	IPR027806	B	Harbinger transposase-derived nuclease domain	5
20	Emihu1	gain	IPR029526	B	PiggyBac transposable element-derived protein	6
20	Emihu1	gain	IPR035425	B	CENP-T/Histone H4, histone fold	5
20	Emihu1	gain	IPR039123	O	Protein phosphatase 2C	6
20	Emihu1	gain	IPR039421	R	Type I protein exporter	13
20	Emihu1	gain	IPR040703	G	Limiting CO2-inducible protein B/C, beta carbonyic anhydrase domain	5
20	Emihu1	gain	IPR043926	R	ABC transporter family G domain	7
20	Emihu1	gain	IPR044053	Q	Hydroxylase/desaturase AsaB-like	9
20	Emihu1	gain	IPR044574	B	ATPase ARIP4-like	11
20	Emihu1	gain	IPR044808	K	Ethylene-responsive transcription factor	32
20	Emihu1	gain	IPR044861	Q	Isopenicillin N synthase-like, Fe(2+) 2OG dioxygenase domain	9
20	Emihu1	gain	IPR045054	O	Prolyl 4-hydroxylase	15
20	Emihu1	gain	IPR045055	A	DNA2/NAM7-like helicase	10
20	Emihu1	gain	IPR045087	C	Multicopper oxidase	9
20	Emihu1	loss	IPR000203	T	GPS motif	8
20	Emihu1	loss	IPR001461	O	Aspartic peptidase A1 family	7
20	Emihu1	loss	IPR001660	A	Sterile alpha motif domain	12
20	Emihu1	loss	IPR002073	T	3'5'-cyclic nucleotide phosphodiesterase, catalytic domain	7
20	Emihu1	loss	IPR002859	T	PKD/REJ-like domain	6
20	Emihu1	loss	IPR003280	P	Two pore domain potassium channel	7
20	Emihu1	loss	IPR003323	O	OTU domain	8
20	Emihu1	loss	IPR003961	W	Fibronectin type III	10
20	Emihu1	loss	IPR004273	Z	Dynein heavy chain region D6 P-loop domain	9
20	Emihu1	loss	IPR004344	N	Tubulin-tyrosine ligase/Tubulin polyglutamylase	13
20	Emihu1	loss	IPR007111	T	NACHT nucleoside triphosphatase	4
20	Emihu1	loss	IPR010736	R	Sperm-tail PG-rich repeat	7
20	Emihu1	loss	IPR011641	T	Tyrosine-protein kinase ephrin type A/B receptor-like	7
20	Emihu1	loss	IPR013099	P	Potassium channel domain	13
20	Emihu1	loss	IPR013105	T	Tetratricopeptide repeat 2	6
20	Emihu1	loss	IPR013111	T	EGF-like domain, extracellular	4
20	Emihu1	loss	IPR013122	T	Polycystin cation channel, PKD1/PKD2	17
20	Emihu1	loss	IPR013594	Z	Dynein heavy chain, domain-1	6
20	Emihu1	loss	IPR013602	Z	Dynein heavy chain, domain-2	11
20	Emihu1	loss	IPR015353	R	Rubisco LSMT, substrate-binding domain	6
20	Emihu1	loss	IPR017868	Z	Filamin/ABP280 repeat-like	19
20	Emihu1	loss	IPR023379	F	BART domain	11
20	Emihu1	loss	IPR024317	Z	Dynein heavy chain, AAA module D4	10
20	Emihu1	loss	IPR024743	Z	Dynein heavy chain, coiled coil stalk	11
20	Emihu1	loss	IPR024862	R	Transient receptor potential cation channel subfamily V	7
20	Emihu1	loss	IPR024977	D	Anaphase-promoting complex subunit 4, WD40 domain	6
20	Emihu1	loss	IPR026983	Z	Dynein heavy chain	6
20	Emihu1	loss	IPR033078	W	Tenascin-C	8
20	Emihu1	loss	IPR033121	O	Peptidase family A1 domain	8
20	Emihu1	loss	IPR035699	Z	Dynein heavy chain, hydrolytic ATP-binding dynein motor region	10
20	Emihu1	loss	IPR035706	Z	Dynein heavy chain, ATP-binding dynein motor region	12
20	Emihu1	loss	IPR041466	Z	Dynein heavy chain, AAA 5 extension domain	8
20	Emihu1	loss	IPR041589	Z	Dynein heavy chain 3, AAA+ lid domain	8
20	Emihu1	loss	IPR041658	Z	Dynein heavy chain AAA lid domain	7
20	Emihu1	loss	IPR043203	T	Voltage-gated cation channel calcium and sodium	13
20	Emihu1	loss	IPR043533	T	Cyclic nucleotide-binding domain-containing protein 1/2	5
20	Emihu1	loss	IPR044801	Z	Filamin family	9
20	Emihu1	loss	IPR045122	T	Calcium permeable stress-gated cation channel 1-like	7
20	Emihu1	loss	IPR045156	U	Vacuolar protein 8	7
21		gain	IPR000157	T	Toll/interleukin-1 receptor homology (TIR) domain	16
21		gain	IPR000182	R	GNAT domain	16
21		gain	IPR000219	T	Dbl homology (DH) domain	4
21		gain	IPR000253	R	Forkhead-associated (FHA) domain	14
21		gain	IPR000330	K	SNF2, N-terminal	16
21		gain	IPR000387	O	Tyrosine-specific protein phosphatases domain	10
21		gain	IPR000408	B	Regulator of chromosome condensation, RCC1	20
21		gain	IPR000569	O	HECT domain	8
21		gain	IPR000768	O	NAD:arginine ADP-ribosyltransferase, ART	10
21		gain	IPR000859	T	CUB domain	5
21		gain	IPR000863	P	Sulfotransferase domain	8
21		gain	IPR000873	I	AMP-dependent synthetase/ligase domain	10
21		gain	IPR000909	T	Phosphatidylinositol-specific phospholipase C, X domain	6
21		gain	IPR000961	T	AGC-kinase, C-terminal	7
21		gain	IPR001179	O	FKBP-type peptidyl-prolyl cis-trans isomerase domain	21
21		gain	IPR001192	T	Phosphoinositide phospholipase C family	7
21		gain	IPR001251	T	CRAL-TRIO lipid binding domain	14
21		gain	IPR001254	O	Serine proteases, trypsin domain	6
21		gain	IPR001300	T	Peptidase C2, calpain, catalytic domain	8
21		gain	IPR001304	M	C-type lectin-like	9
21		gain	IPR001452	R	SH3 domain	6
21		gain	IPR001466	R	Beta-lactamase-related	10
21		gain	IPR001547	G	Glycoside hydrolase, family 5	14
21		gain	IPR001563	O	Peptidase S10, serine carboxypeptidase	6
21		gain	IPR001594	O	Palmitoyltransferase, DHHC domain	10
21		gain	IPR001660	A	Sterile alpha motif domain	11
21		gain	IPR001675	G	Glycosyl transferase family 29	7
21		gain	IPR001683	T	Phox homology	9
21		gain	IPR001711	T	Phospholipase C, phosphatidylinositol-specific, Y domain	5
21		gain	IPR001715	Z	Calponin homology domain	8
21		gain	IPR001722	G	Glycoside hydrolase, family 7	4
21		gain	IPR001739	B	Methyl-CpG DNA binding	5
21		gain	IPR001764	G	Glycoside hydrolase, family 3, N-terminal	8
21		gain	IPR001810	O	F-box domain	11
21		gain	IPR001932	T	PPM-type phosphatase-like domain	14
21		gain	IPR002018	I	Carboxylesterase, type B	5
21		gain	IPR002035	W	von Willebrand factor, type A	9
21		gain	IPR002059	K	Cold-shock protein, DNA-binding	8
21		gain	IPR002130	O	Cyclophilin-type peptidyl-prolyl cis-trans isomerase domain	13
21		gain	IPR002241	G	Glycoside hydrolase, family 27	7
21		gain	IPR002495	G	Glycosyl transferase, family 8	11
21		gain	IPR002528	Q	Multi antimicrobial extrusion protein	7
21		gain	IPR002659	G	Glycosyl transferase, family 31	18
21		gain	IPR002772	G	Glycoside hydrolase family 3 C-terminal domain	7
21		gain	IPR002857	B	Zinc finger, CXXC-type	6
21		gain	IPR002885	A	Pentatricopeptide repeat	12
21		gain	IPR003034	R	SAP domain	19
21		gain	IPR003280	P	Two pore domain potassium channel	9
21		gain	IPR003540	O	ADP ribosyltransferase	3
21		gain	IPR003582	O	ShKT domain	32
21		gain	IPR003819	P	TauD/TfdA-like domain	7
21		gain	IPR003961	W	Fibronectin type III	14
21		gain	IPR004147	R	UbiB domain	9
21		gain	IPR004170	O	WWE domain	5
21		gain	IPR004263	W	Exostosin-like	30
21		gain	IPR004302	M	Cellulose/chitin-binding protein, N-terminal	3
21		gain	IPR004344	N	Tubulin-tyrosine ligase/Tubulin polyglutamylase	9
21		gain	IPR004843	T	Calcineurin-like phosphoesterase domain, ApaH type	15
21		gain	IPR004853	G	Sugar phosphate transporter domain	16
21		gain	IPR004869	R	Membrane transport protein MMPL domain	3
21		gain	IPR004963	G	Pectinacetylesterase/NOTUM	5
21		gain	IPR005046	S	Protein of unknown function DUF285	13
21		gain	IPR005135	R	Endonuclease/exonuclease/phosphatase	10
21		gain	IPR005331	W	Sulfotransferase	12
21		gain	IPR005645	R	Serine hydrolase FSH	6
21		gain	IPR006103	G	Glycoside hydrolase family 2, catalytic domain	7
21		gain	IPR006104	G	Glycosyl hydrolases family 2, sugar binding domain	5
21		gain	IPR006201	T	Neurotransmitter-gated ion-channel	10
21		gain	IPR006202	T	Neurotransmitter-gated ion-channel ligand-binding domain	4
21		gain	IPR006598	O	Glycosyl transferase CAP10 domain	12
21		gain	IPR006634	I	TRAM/LAG1/CLN8 homology domain	8
21		gain	IPR006652	R	Kelch repeat type 1	13
21		gain	IPR007052	R	CS domain	11
21		gain	IPR007248	U	Mpv17/PMP22	13
21		gain	IPR007271	G	Nucleotide-sugar transporter	11
21		gain	IPR007577	G	Glycosyltransferase, DXD sugar-binding motif	14
21		gain	IPR007603	I	Choline transporter-like	6
21		gain	IPR007657	G	Glycosyltransferase 61	14
21		gain	IPR007803	R	Aspartyl/asparaginy/proline hydroxylase	8
21		gain	IPR008521	P	Magnesium transporter NIPA	12
21		gain	IPR008630	G	Glycosyltransferase 34	4
21		gain	IPR008775	I	Phytanoyl-CoA dioxygenase	22
21		gain	IPR008884	Q	Macrocin-O-methyltransferase	8
21		gain	IPR009081	I	Phosphopantetheine binding ACP domain	8
21		gain	IPR009769	T	Protein ENHANCED DISEASE RESISTANCE 2, C-terminal	5
21		gain	IPR011124	B	Zinc finger, CW-type	11
21		gain	IPR011527	R	ABC transporter type 1, transmembrane domain	11
21		gain	IPR011705	O	BTB/Kelch-associated	10
21		gain	IPR012317	F	Poly(ADP-ribose) polymerase, catalytic domain	13
21		gain	IPR013017	T	NHL repeat, subgroup	11
21		gain	IPR013057	E	Amino acid transporter, transmembrane domain	13
21		gain	IPR013078	G	Histidine phosphatase superfamily, clade-1	12
21		gain	IPR013094	R	Alpha/beta hydrolase fold-3	8
21		gain	IPR013099	P	Potassium channel domain	12
21		gain	IPR013122	T	Polycystin cation channel, PKD1/PKD2	8
21		gain	IPR013216	R	Methyltransferase type 11	12
21		gain	IPR013517	W	FG-GAP repeat	10
21		gain	IPR013830	I	SGNH hydrolase-type esterase domain	11
21		gain	IPR013968	Q	Polyketide synthase, ketoreductase domain	7
21		gain	IPR014830	M	Glycolipid transfer protein domain	7
21		gain	IPR015940	R	Ubiquitin-associated domain	9
21		gain	IPR017455	R	Zinc finger, FYVE-related	5
21		gain	IPR017868	Z	Filamin/ABP280 repeat-like	8
21		gain	IPR019378	O	GDP-fucose protein O-fucosyltransferase	5
21		gain	IPR019410	O	Lysine methyltransferase	23
21		gain	IPR019787	K	Zinc finger, PHD-finger	12
21		gain	IPR020471	R	Aldo/keto reductase	9
21		gain	IPR021134	P	Bestrophin/UPF0187	14
21		gain	IPR021838	S	Protein of unknown function DUF3431	6
21		gain	IPR022105	S	Protein of unknown function DUF3645	4
21		gain	IPR023210	R	NADP-dependent oxidoreductase domain	14
21		gain	IPR025640	R	GYF domain 2	5
21		gain	IPR025714	R	Methyltransferase domain	9
21		gain	IPR026057	I	PC-Esterase	7
21		gain	IPR026891	S	Fibronectin type III-like domain	7
21		gain	IPR028325	T	Voltage-gated potassium channel	8
21		gain	IPR028427	O	Peptide methionine sulfoxide reductase	4
21		gain	IPR033078	W	Tenascin-C	5
21		gain	IPR037359	W	Heparan sulfate sulfotransferase	9
21		gain	IPR037919	O	UDP-N-acetylglucosamine--peptide N-acetylglucosaminyltransferase 110kDa subunit	4
21		gain	IPR039038	O	Aspartyl/asparaginyl beta-hydroxylase family	5
21		gain	IPR039367	O	Initiation-specific alpha-1,6-mannosyltransferase Och1-like	3
21		gain	IPR039448	R	Right handed beta helix domain	6
21		gain	IPR041491	T	TRPM, SLOG domain	7
21		gain	IPR041667	K	Cupin-like domain 8	22
21		gain	IPR041698	R	Methyltransferase domain 25	9
21		gain	IPR043203	T	Voltage-gated cation channel calcium and sodium	7
21		gain	IPR044801	Z	Filamin family	6
21		gain	IPR044808	K	Ethylene-responsive transcription factor	5
21		gain	IPR044845	O	Glycosyltransferase HPAT/SRGT1-like	7
21		gain	IPR045054	O	Prolyl 4-hydroxylase	23
21		gain	IPR045122	T	Calcium permeable stress-gated cation channel 1-like	6
22	Phaant1	gain	IPR000073	R	Alpha/beta hydrolase fold-1	5
22	Phaant1	gain	IPR000387	O	Tyrosine-specific protein phosphatases domain	4
22	Phaant1	gain	IPR000569	O	HECT domain	6
22	Phaant1	gain	IPR000608	O	Ubiquitin-conjugating enzyme E2	7
22	Phaant1	gain	IPR000644	O	CBS domain	6
22	Phaant1	gain	IPR000683	R	Oxidoreductase, N-terminal	4
22	Phaant1	gain	IPR000717	O	Proteasome component (PCI) domain	4
22	Phaant1	gain	IPR000731	U	Sterol-sensing domain	4
22	Phaant1	gain	IPR000863	P	Sulfotransferase domain	12
22	Phaant1	gain	IPR000873	I	AMP-dependent synthetase/ligase domain	4
22	Phaant1	gain	IPR000961	T	AGC-kinase, C-terminal	4
22	Phaant1	gain	IPR001107	R	Band 7 domain	7
22	Phaant1	gain	IPR001179	O	FKBP-type peptidyl-prolyl cis-trans isomerase domain	12
22	Phaant1	gain	IPR001223	G	Glycoside hydrolase family 18, catalytic domain	3
22	Phaant1	gain	IPR001251	T	CRAL-TRIO lipid binding domain	6
22	Phaant1	gain	IPR001296	G	Glycosyl transferase, family 1	5
22	Phaant1	gain	IPR001425	C	Archaeal/bacterial/fungal rhodopsins	5
22	Phaant1	gain	IPR001433	C	Oxidoreductase FAD/NAD(P)-binding	6
22	Phaant1	gain	IPR001734	P	Sodium/solute symporter	4
22	Phaant1	gain	IPR001765	G	Carbonic anhydrase	2
22	Phaant1	gain	IPR001806	T	Small GTPase	6
22	Phaant1	gain	IPR001807	P	Chloride channel, voltage gated	3
22	Phaant1	gain	IPR001910	F	Inosine/uridine-preferring nucleoside hydrolase domain	7
22	Phaant1	gain	IPR001926	E	Tryptophan synthase beta chain-like, PALP domain	6
22	Phaant1	gain	IPR001932	T	PPM-type phosphatase-like domain	8
22	Phaant1	gain	IPR002109	C	Glutaredoxin	4
22	Phaant1	gain	IPR002130	O	Cyclophilin-type peptidyl-prolyl cis-trans isomerase domain	8
22	Phaant1	gain	IPR002455	T	GPCR family 3, GABA-B receptor	4
22	Phaant1	gain	IPR002562	L	3'-5' exonuclease domain	4
22	Phaant1	gain	IPR002921	I	Fungal lipase-like domain	6
22	Phaant1	gain	IPR002938	C	FAD-binding domain	16
22	Phaant1	gain	IPR003137	O	PA domain	3
22	Phaant1	gain	IPR003337	G	Trehalose-phosphatase	4
22	Phaant1	gain	IPR003392	T	Protein patched/dispatched	5
22	Phaant1	gain	IPR003864	P	CSC1/OSCA1-like, 7TM region	3
22	Phaant1	gain	IPR004088	A	K Homology domain, type 1	4
22	Phaant1	gain	IPR004104	R	Oxidoreductase, C-terminal	6
22	Phaant1	gain	IPR004342	T	EXS, C-terminal	2
22	Phaant1	gain	IPR004367	D	Cyclin, C-terminal domain	11
22	Phaant1	gain	IPR004839	E	Aminotransferase, class I/classII	4
22	Phaant1	gain	IPR004853	G	Sugar phosphate transporter domain	7
22	Phaant1	gain	IPR005117	P	Nitrite/Sulfite reductase ferredoxin-like domain	7
22	Phaant1	gain	IPR005645	R	Serine hydrolase FSH	5
22	Phaant1	gain	IPR005804	I	Fatty acid desaturase domain	5
22	Phaant1	gain	IPR005828	G	Major facilitator, sugar transporter-like	4
22	Phaant1	gain	IPR005936	O	Peptidase, FtsH	5
22	Phaant1	gain	IPR006043	H	Xanthine/uracil/vitamin C permease	2
22	Phaant1	gain	IPR006067	P	Nitrite/sulphite reductase 4Fe-4S domain	7
22	Phaant1	gain	IPR006073	R	GTP binding domain	4
22	Phaant1	gain	IPR006094	C	FAD linked oxidase, N-terminal	8
22	Phaant1	gain	IPR006201	T	Neurotransmitter-gated ion-channel	7
22	Phaant1	gain	IPR006202	T	Neurotransmitter-gated ion-channel ligand-binding domain	3
22	Phaant1	gain	IPR006634	I	TRAM/LAG1/CLN8 homology domain	9
22	Phaant1	gain	IPR006652	R	Kelch repeat type 1	10
22	Phaant1	gain	IPR006671	D	Cyclin, N-terminal	4
22	Phaant1	gain	IPR007130	I	Diacylglycerol acyltransferase	4
22	Phaant1	gain	IPR007248	U	Mpv17/PMP22	5
22	Phaant1	gain	IPR007271	G	Nucleotide-sugar transporter	6
22	Phaant1	gain	IPR007345	G	Polysaccharide pyruvyl transferase	4
22	Phaant1	gain	IPR007630	K	RNA polymerase sigma-70 region 4	3
22	Phaant1	gain	IPR008217	P	Ccc1 family	8
22	Phaant1	gain	IPR008333	C	Flavoprotein pyridine nucleotide cytochrome reductase-like, FAD-binding domain	8
22	Phaant1	gain	IPR008884	Q	Macrocin-O-methyltransferase	4
22	Phaant1	gain	IPR009056	C	Cytochrome c-like domain	4
22	Phaant1	gain	IPR009071	K	High mobility group box domain	4
22	Phaant1	gain	IPR009465	R	Spondin, N-terminal	3
22	Phaant1	gain	IPR010285	L	DNA helicase Pif1-like	4
22	Phaant1	gain	IPR011016	O	Zinc finger, RING-CH-type	12
22	Phaant1	gain	IPR011527	R	ABC transporter type 1, transmembrane domain	6
22	Phaant1	gain	IPR011705	O	BTB/Kelch-associated	6
22	Phaant1	gain	IPR012336	C	Thioredoxin-like fold	3
22	Phaant1	gain	IPR013121	C	Ferric reductase, NAD binding domain	2
22	Phaant1	gain	IPR013149	R	Alcohol dehydrogenase, C-terminal	12
22	Phaant1	gain	IPR013154	R	Alcohol dehydrogenase, N-terminal	9
22	Phaant1	gain	IPR013525	R	ABC-2 type transporter	11
22	Phaant1	gain	IPR013584	A	RAP domain	6
22	Phaant1	gain	IPR014830	M	Glycolipid transfer protein domain	4
22	Phaant1	gain	IPR015655	O	Protein phosphatase 2C family	7
22	Phaant1	gain	IPR016040	C	NAD(P)-binding domain	13
22	Phaant1	gain	IPR016137	T	RGS domain	5
22	Phaant1	gain	IPR016158	O	Cullin homology domain	3
22	Phaant1	gain	IPR016166	C	FAD-binding domain, PCMH-type	8
22	Phaant1	gain	IPR017927	C	FAD-binding domain, ferredoxin reductase-type	4
22	Phaant1	gain	IPR017978	T	GPCR family 3, C-terminal	5
22	Phaant1	gain	IPR018011	W	Carbohydrate sulfotransferase 8-10	5
22	Phaant1	gain	IPR019587	Q	Polyketide cyclase/dehydrase	6
22	Phaant1	gain	IPR020946	Q	Flavin monooxygenase-like	4
22	Phaant1	gain	IPR021134	P	Bestrophin/UPF0187	9
22	Phaant1	gain	IPR021884	M	Ice-binding protein-like	19
22	Phaant1	gain	IPR022742	O	Serine aminopeptidase, S33	7
22	Phaant1	gain	IPR022764	O	Peptidase S54, rhomboid domain	3
22	Phaant1	gain	IPR023186	F	Inosine/uridine-preferring nucleoside hydrolase	11
22	Phaant1	gain	IPR023210	R	NADP-dependent oxidoreductase domain	7
22	Phaant1	gain	IPR023561	G	Carbonic anhydrase, alpha-class	2
22	Phaant1	gain	IPR024862	R	Transient receptor potential cation channel subfamily V	3
22	Phaant1	gain	IPR025197	O	Domain of unknown function DUF4116	11
22	Phaant1	gain	IPR025306	R	Probable zinc-binding domain	9
22	Phaant1	gain	IPR025476	B	Helitron helicase-like domain	4
22	Phaant1	gain	IPR025799	O	Protein arginine N-methyltransferase	4
22	Phaant1	gain	IPR025875	R	Leucine rich repeat 4	3
22	Phaant1	gain	IPR026057	I	PC-Esterase	5
22	Phaant1	gain	IPR026891	S	Fibronectin type III-like domain	3
22	Phaant1	gain	IPR027370	R	RING-type zinc-finger, LisH dimerisation motif	3
22	Phaant1	gain	IPR028325	T	Voltage-gated potassium channel	4
22	Phaant1	gain	IPR029962	M	Trichome birefringence-like family	3
22	Phaant1	gain	IPR031468	U	Synaptotagmin-like mitochondrial-lipid-binding domain	3
22	Phaant1	gain	IPR032808	S	DoxX family	5
22	Phaant1	gain	IPR033078	W	Tenascin-C	3
22	Phaant1	gain	IPR037359	W	Heparan sulfate sulfotransferase	7
22	Phaant1	gain	IPR037524	M	PA14/GLEYA domain	2
22	Phaant1	gain	IPR039123	O	Protein phosphatase 2C	2
22	Phaant1	gain	IPR039361	D	Cyclin	10
22	Phaant1	gain	IPR039633	I	Plastid-lipid-associated protein	3
22	Phaant1	gain	IPR040703	G	Limiting CO2-inducible protein B/C, beta carbonyic anhydrase domain	5
22	Phaant1	gain	IPR040884	T	SMODS and SLOG-associating 2TM effector domain 1	6
22	Phaant1	gain	IPR041569	R	AAA ATPase, AAA+ lid domain	4
22	Phaant1	gain	IPR044669	S	UPF0187 family	9
22	Phaant1	gain	IPR044808	K	Ethylene-responsive transcription factor	3
22	Phaant1	gain	IPR044845	O	Glycosyltransferase HPAT/SRGT1-like	4
22	Phaant1	gain	IPR045054	O	Prolyl 4-hydroxylase	6
22	Phaant1	gain	IPR045100	A	TUTase nucleotidyltransferase domain	9
22	Phaant1	loss	IPR000001	T	Kringle	3
22	Phaant1	loss	IPR000212	L	DNA helicase, UvrD/REP type	3
22	Phaant1	loss	IPR000219	T	Dbl homology (DH) domain	4
22	Phaant1	loss	IPR000253	R	Forkhead-associated (FHA) domain	7
22	Phaant1	loss	IPR000261	T	EH domain	6
22	Phaant1	loss	IPR000306	R	FYVE zinc finger	4
22	Phaant1	loss	IPR000313	R	PWWP domain	5
22	Phaant1	loss	IPR000868	E	Isochorismatase-like	4
22	Phaant1	loss	IPR000998	W	MAM domain	4
22	Phaant1	loss	IPR001304	M	C-type lectin-like	15
22	Phaant1	loss	IPR001356	K	Homeobox domain	5
22	Phaant1	loss	IPR001360	G	Glycoside hydrolase family 1	2
22	Phaant1	loss	IPR001368	T	TNFR/NGFR cysteine-rich region	2
22	Phaant1	loss	IPR001452	R	SH3 domain	6
22	Phaant1	loss	IPR001525	B	C-5 cytosine methyltransferase	5
22	Phaant1	loss	IPR001646	R	Pentapeptide repeat	2
22	Phaant1	loss	IPR001722	G	Glycoside hydrolase, family 7	3
22	Phaant1	loss	IPR001763	T	Rhodanese-like domain	5
22	Phaant1	loss	IPR001828	T	Receptor, ligand binding region	4
22	Phaant1	loss	IPR002035	W	von Willebrand factor, type A	8
22	Phaant1	loss	IPR002059	K	Cold-shock protein, DNA-binding	3
22	Phaant1	loss	IPR002121	K	HRDC domain	2
22	Phaant1	loss	IPR002156	A	Ribonuclease H domain	2
22	Phaant1	loss	IPR002182	T	NB-ARC	2
22	Phaant1	loss	IPR002293	E	Amino acid/polyamine transporter I	3
22	Phaant1	loss	IPR002575	Q	Aminoglycoside phosphotransferase	3
22	Phaant1	loss	IPR002654	G	Glycosyl transferase, family 25	3
22	Phaant1	loss	IPR002857	B	Zinc finger, CXXC-type	4
22	Phaant1	loss	IPR002859	T	PKD/REJ-like domain	2
22	Phaant1	loss	IPR002889	G	Carbohydrate-binding WSC	2
22	Phaant1	loss	IPR003034	R	SAP domain	15
22	Phaant1	loss	IPR003323	O	OTU domain	3
22	Phaant1	loss	IPR003406	G	Glycosyl transferase, family 14	3
22	Phaant1	loss	IPR003540	O	ADP ribosyltransferase	4
22	Phaant1	loss	IPR004166	O	MHCK/EF2 kinase	3
22	Phaant1	loss	IPR004869	R	Membrane transport protein MMPL domain	3
22	Phaant1	loss	IPR005046	S	Protein of unknown function DUF285	4
22	Phaant1	loss	IPR006179	F	5'-Nucleotidase/apyrase	3
22	Phaant1	loss	IPR006461	T	PLAC8 motif-containing protein	2
22	Phaant1	loss	IPR007065	S	HPP	3
22	Phaant1	loss	IPR007110	W	Immunoglobulin-like domain	2
22	Phaant1	loss	IPR007111	T	NACHT nucleoside triphosphatase	4
22	Phaant1	loss	IPR008166	G	Glycosyltransferase family 92	2
22	Phaant1	loss	IPR008422	K	Homeobox KN domain	2
22	Phaant1	loss	IPR009081	I	Phosphopantetheine binding ACP domain	5
22	Phaant1	loss	IPR010869	S	Protein of unknown function DUF1501	2
22	Phaant1	loss	IPR011707	C	Multicopper oxidase, type 3	2
22	Phaant1	loss	IPR013105	T	Tetratricopeptide repeat 2	3
22	Phaant1	loss	IPR013517	W	FG-GAP repeat	9
22	Phaant1	loss	IPR013968	Q	Polyketide synthase, ketoreductase domain	3
22	Phaant1	loss	IPR014016	L	UvrD-like helicase, ATP-binding domain	4
22	Phaant1	loss	IPR014017	L	UvrD-like DNA helicase, C-terminal	4
22	Phaant1	loss	IPR014030	I	Beta-ketoacyl synthase, N-terminal	4
22	Phaant1	loss	IPR014031	I	Beta-ketoacyl synthase, C-terminal	4
22	Phaant1	loss	IPR014917	S	Protein of unknown function DUF1800	3
22	Phaant1	loss	IPR017455	R	Zinc finger, FYVE-related	4
22	Phaant1	loss	IPR017868	Z	Filamin/ABP280 repeat-like	4
22	Phaant1	loss	IPR019786	K	Zinc finger, PHD-type, conserved site	11
22	Phaant1	loss	IPR019787	K	Zinc finger, PHD-finger	9
22	Phaant1	loss	IPR020807	Q	Polyketide synthase, dehydratase domain	2
22	Phaant1	loss	IPR021838	S	Protein of unknown function DUF3431	4
22	Phaant1	loss	IPR022105	S	Protein of unknown function DUF3645	2
22	Phaant1	loss	IPR023780	B	Chromo domain	4
22	Phaant1	loss	IPR024041	P	Ammonium transporter AmtB-like domain	6
22	Phaant1	loss	IPR025475	S	Protein of unknown function DUF4326)	3
22	Phaant1	loss	IPR025640	R	GYF domain 2	3
22	Phaant1	loss	IPR026854	U	Vacuolar protein sorting-associated protein 13, N-terminal domain	3
22	Phaant1	loss	IPR026983	Z	Dynein heavy chain	2
22	Phaant1	loss	IPR027640	Z	Kinesin-like protein	4
22	Phaant1	loss	IPR031646	U	Vacuolar protein sorting-associated protein 13, second N-terminal domain	2
22	Phaant1	loss	IPR037919	O	UDP-N-acetylglucosamine--peptide N-acetylglucosaminyltransferase 110kDa subunit	3
22	Phaant1	loss	IPR039038	O	Aspartyl/asparaginyl beta-hydroxylase family	4
22	Phaant1	loss	IPR039367	O	Initiation-specific alpha-1,6-mannosyltransferase Och1-like	2
22	Phaant1	loss	IPR040626	O	Cytosolic carboxypeptidase, N-terminal	2
22	Phaant1	loss	IPR041698	R	Methyltransferase domain 25	4
22	Phaant1	loss	IPR044801	Z	Filamin family	5
22	Phaant1	loss	IPR045053	M	Mannan endo-1,4-beta-mannosidase-like	2
23		gain	IPR000558	B	Histone H2B	3
23		gain	IPR003280	P	Two pore domain potassium channel	5
23		gain	IPR007125	B	Histone H2A/H2B/H3	6
23		gain	IPR018011	W	Carbohydrate sulfotransferase 8-10	4
23		gain	IPR018316	N	Tubulin/FtsZ, 2-layer sandwich domain	6
23		gain	IPR032454	B	Histone H2A, C-terminal domain	3
23		gain	IPR035425	B	CENP-T/Histone H4, histone fold	4
23		loss	IPR000203	T	GPS motif	3
23		loss	IPR000212	L	DNA helicase, UvrD/REP type	3
23		loss	IPR000253	R	Forkhead-associated (FHA) domain	6
23		loss	IPR000330	K	SNF2, N-terminal	16
23		loss	IPR000408	B	Regulator of chromosome condensation, RCC1	11
23		loss	IPR000668	O	Peptidase C1A, papain C-terminal	7
23		loss	IPR000757	G	Glycoside hydrolase family 16	3
23		loss	IPR000768	O	NAD:arginine ADP-ribosyltransferase, ART	9
23		loss	IPR001173	G	Glycosyltransferase 2-like	4
23		loss	IPR001204	P	Phosphate transporter	2
23		loss	IPR001357	L	BRCT domain	4
23		loss	IPR001394	O	Peptidase C19, ubiquitin carboxyl-terminal hydrolase	5
23		loss	IPR001466	R	Beta-lactamase-related	5
23		loss	IPR001563	O	Peptidase S10, serine carboxypeptidase	4
23		loss	IPR001678	J	SAM-dependent methyltransferase RsmB/NOP2-type	4
23		loss	IPR001683	T	Phox homology	7
23		loss	IPR001810	O	F-box domain	8
23		loss	IPR001943	L	UVR domain	2
23		loss	IPR002018	I	Carboxylesterase, type B	4
23		loss	IPR002372	C	Pyrrolo-quinoline quinone repeat	2
23		loss	IPR002498	T	Phosphatidylinositol-4-phosphate 5-kinase, core	5
23		loss	IPR002656	O	Acyltransferase 3 domain	3
23		loss	IPR002885	A	Pentatricopeptide repeat	8
23		loss	IPR002937	E	Amine oxidase	5
23		loss	IPR003123	U	VPS9 domain	3
23		loss	IPR003819	P	TauD/TfdA-like domain	5
23		loss	IPR003961	W	Fibronectin type III	8
23		loss	IPR004170	O	WWE domain	4
23		loss	IPR004843	T	Calcineurin-like phosphoesterase domain, ApaH type	8
23		loss	IPR005114	K	Helicase-associated	3
23		loss	IPR005135	R	Endonuclease/exonuclease/phosphatase	7
23		loss	IPR007312	I	Phosphoesterase	2
23		loss	IPR007632	P	Anoctamin	3
23		loss	IPR008775	I	Phytanoyl-CoA dioxygenase	8
23		loss	IPR011124	B	Zinc finger, CW-type	5
23		loss	IPR012317	F	Poly(ADP-ribose) polymerase, catalytic domain	9
23		loss	IPR013057	E	Amino acid transporter, transmembrane domain	6
23		loss	IPR013120	I	Male sterility, NAD-binding	2
23		loss	IPR013201	O	Cathepsin propeptide inhibitor domain (I29)	3
23		loss	IPR013517	W	FG-GAP repeat	5
23		loss	IPR013519	W	Integrin alpha beta-propellor	3
23		loss	IPR013602	Z	Dynein heavy chain, domain-2	4
23		loss	IPR013968	Q	Polyketide synthase, ketoreductase domain	4
23		loss	IPR015914	R	Purple acid phosphatase, N-terminal	2
23		loss	IPR015940	R	Ubiquitin-associated domain	8
23		loss	IPR017868	Z	Filamin/ABP280 repeat-like	7
23		loss	IPR018946	R	Alkaline phosphatase D-related	2
23		loss	IPR019786	K	Zinc finger, PHD-type, conserved site	5
23		loss	IPR019787	K	Zinc finger, PHD-finger	8
23		loss	IPR022099	S	Protein of unknown function DUF3638	4
23		loss	IPR023610	T	Phosphatidylinositol-4-phosphate 5-kinase	5
23		loss	IPR023631	E	Amidase signature domain	3
23		loss	IPR025714	R	Methyltransferase domain	6
23		loss	IPR025733	R	Iron/zinc purple acid phosphatase-like C-terminal domain	4
23		loss	IPR026854	U	Vacuolar protein sorting-associated protein 13, N-terminal domain	5
23		loss	IPR026983	Z	Dynein heavy chain	3
23		loss	IPR026992	R	Non-haem dioxygenase N-terminal domain	3
23		loss	IPR027640	Z	Kinesin-like protein	10
23		loss	IPR031646	U	Vacuolar protein sorting-associated protein 13, second N-terminal domain	4
23		loss	IPR032861	M	Xylanase inhibitor, N-terminal	2
23		loss	IPR035699	Z	Dynein heavy chain, hydrolytic ATP-binding dynein motor region	4
23		loss	IPR040626	O	Cytosolic carboxypeptidase, N-terminal	3
23		loss	IPR041491	T	TRPM, SLOG domain	6
23		loss	IPR041667	K	Cupin-like domain 8	12
23		loss	IPR043203	T	Voltage-gated cation channel calcium and sodium	5
23		loss	IPR045156	U	Vacuolar protein 8	3
24	Phaglo1	gain	IPR001304	M	C-type lectin-like	13
24	Phaglo1	gain	IPR001368	T	TNFR/NGFR cysteine-rich region	2
24	Phaglo1	gain	IPR001525	B	C-5 cytosine methyltransferase	24
24	Phaglo1	gain	IPR001646	R	Pentapeptide repeat	7
24	Phaglo1	gain	IPR001828	T	Receptor, ligand binding region	5
24	Phaglo1	gain	IPR002035	W	von Willebrand factor, type A	9
24	Phaglo1	gain	IPR002182	T	NB-ARC	3
24	Phaglo1	gain	IPR002350	O	Kazal domain	3
24	Phaglo1	gain	IPR003034	R	SAP domain	12
24	Phaglo1	gain	IPR008906	B	HAT, C-terminal dimerisation domain	4
24	Phaglo1	gain	IPR010869	S	Protein of unknown function DUF1501	2
24	Phaglo1	gain	IPR013130	C	Ferric reductase transmembrane component-like domain	2
24	Phaglo1	gain	IPR013819	I	Lipoxygenase, C-terminal	2
24	Phaglo1	gain	IPR024041	P	Ammonium transporter AmtB-like domain	4
24	Phaglo1	gain	IPR025475	S	Protein of unknown function DUF4326)	10
24	Phaglo1	gain	IPR039904	S	TPR and ankyrin repeat-containing protein 1	2
24	Phaglo1	loss	IPR000014	T	PAS domain	3
24	Phaglo1	loss	IPR000073	R	Alpha/beta hydrolase fold-1	8
24	Phaglo1	loss	IPR000157	T	Toll/interleukin-1 receptor homology (TIR) domain	9
24	Phaglo1	loss	IPR000195	U	Rab-GTPase-TBC domain	3
24	Phaglo1	loss	IPR000269	E	Copper amine oxidase	2
24	Phaglo1	loss	IPR000322	G	Glycoside hydrolase family 31	3
24	Phaglo1	loss	IPR000330	K	SNF2, N-terminal	4
24	Phaglo1	loss	IPR000340	O	Dual specificity phosphatase, catalytic domain	6
24	Phaglo1	loss	IPR000387	O	Tyrosine-specific protein phosphatases domain	10
24	Phaglo1	loss	IPR000408	B	Regulator of chromosome condensation, RCC1	12
24	Phaglo1	loss	IPR000569	O	HECT domain	4
24	Phaglo1	loss	IPR000608	O	Ubiquitin-conjugating enzyme E2	9
24	Phaglo1	loss	IPR000620	R	EamA domain	4
24	Phaglo1	loss	IPR000644	O	CBS domain	5
24	Phaglo1	loss	IPR000683	R	Oxidoreductase, N-terminal	4
24	Phaglo1	loss	IPR000717	O	Proteasome component (PCI) domain	5
24	Phaglo1	loss	IPR000731	U	Sterol-sensing domain	7
24	Phaglo1	loss	IPR000768	O	NAD:arginine ADP-ribosyltransferase, ART	2
24	Phaglo1	loss	IPR000834	O	Peptidase M14, carboxypeptidase A	3
24	Phaglo1	loss	IPR000873	I	AMP-dependent synthetase/ligase domain	17
24	Phaglo1	loss	IPR000909	T	Phosphatidylinositol-specific phospholipase C, X domain	3
24	Phaglo1	loss	IPR000961	T	AGC-kinase, C-terminal	8
24	Phaglo1	loss	IPR001107	R	Band 7 domain	5
24	Phaglo1	loss	IPR001179	O	FKBP-type peptidyl-prolyl cis-trans isomerase domain	8
24	Phaglo1	loss	IPR001192	T	Phosphoinositide phospholipase C family	4
24	Phaglo1	loss	IPR001199	C	Cytochrome b5-like heme/steroid binding domain	6
24	Phaglo1	loss	IPR001251	T	CRAL-TRIO lipid binding domain	11
24	Phaglo1	loss	IPR001293	T	Zinc finger, TRAF-type	2
24	Phaglo1	loss	IPR001296	G	Glycosyl transferase, family 1	3
24	Phaglo1	loss	IPR001320	E	Ionotropic glutamate receptor, C-terminal	4
24	Phaglo1	loss	IPR001357	L	BRCT domain	3
24	Phaglo1	loss	IPR001394	O	Peptidase C19, ubiquitin carboxyl-terminal hydrolase	3
24	Phaglo1	loss	IPR001425	C	Archaeal/bacterial/fungal rhodopsins	4
24	Phaglo1	loss	IPR001433	C	Oxidoreductase FAD/NAD(P)-binding	5
24	Phaglo1	loss	IPR001440	T	Tetratricopeptide repeat 1	4
24	Phaglo1	loss	IPR001466	R	Beta-lactamase-related	5
24	Phaglo1	loss	IPR001563	O	Peptidase S10, serine carboxypeptidase	2
24	Phaglo1	loss	IPR001660	A	Sterile alpha motif domain	8
24	Phaglo1	loss	IPR001675	G	Glycosyl transferase family 29	4
24	Phaglo1	loss	IPR001683	T	Phox homology	5
24	Phaglo1	loss	IPR001711	T	Phospholipase C, phosphatidylinositol-specific, Y domain	3
24	Phaglo1	loss	IPR001715	Z	Calponin homology domain	5
24	Phaglo1	loss	IPR001739	B	Methyl-CpG DNA binding	4
24	Phaglo1	loss	IPR001764	G	Glycoside hydrolase, family 3, N-terminal	5
24	Phaglo1	loss	IPR001806	T	Small GTPase	4
24	Phaglo1	loss	IPR001807	P	Chloride channel, voltage gated	3
24	Phaglo1	loss	IPR001810	O	F-box domain	6
24	Phaglo1	loss	IPR001910	F	Inosine/uridine-preferring nucleoside hydrolase domain	5
24	Phaglo1	loss	IPR001926	E	Tryptophan synthase beta chain-like, PALP domain	5
24	Phaglo1	loss	IPR001932	T	PPM-type phosphatase-like domain	13
24	Phaglo1	loss	IPR002073	T	3'5'-cyclic nucleotide phosphodiesterase, catalytic domain	3
24	Phaglo1	loss	IPR002109	C	Glutaredoxin	4
24	Phaglo1	loss	IPR002130	O	Cyclophilin-type peptidyl-prolyl cis-trans isomerase domain	8
24	Phaglo1	loss	IPR002528	Q	Multi antimicrobial extrusion protein	7
24	Phaglo1	loss	IPR002562	L	3'-5' exonuclease domain	6
24	Phaglo1	loss	IPR002579	O	Peptide methionine sulphoxide reductase MrsB domain	4
24	Phaglo1	loss	IPR002659	G	Glycosyl transferase, family 31	6
24	Phaglo1	loss	IPR002772	G	Glycoside hydrolase family 3 C-terminal domain	6
24	Phaglo1	loss	IPR002867	O	IBR domain	4
24	Phaglo1	loss	IPR002885	A	Pentatricopeptide repeat	10
24	Phaglo1	loss	IPR002912	E	ACT domain	5
24	Phaglo1	loss	IPR002925	Q	Dienelactone hydrolase	2
24	Phaglo1	loss	IPR002938	C	FAD-binding domain	12
24	Phaglo1	loss	IPR003018	T	GAF domain	4
24	Phaglo1	loss	IPR003100	A	PAZ domain	3
24	Phaglo1	loss	IPR003131	P	Potassium channel tetramerisation-type BTB domain	3
24	Phaglo1	loss	IPR003137	O	PA domain	4
24	Phaglo1	loss	IPR003140	I	Phospholipase/carboxylesterase/thioesterase	4
24	Phaglo1	loss	IPR003165	A	Piwi domain	4
24	Phaglo1	loss	IPR003337	G	Trehalose-phosphatase	3
24	Phaglo1	loss	IPR003392	T	Protein patched/dispatched	9
24	Phaglo1	loss	IPR003440	G	Glycosyl transferase, family 48	2
24	Phaglo1	loss	IPR003644	P	Na-Ca exchanger/integrin-beta4	4
24	Phaglo1	loss	IPR003661	T	Signal transduction histidine kinase, dimerisation/phosphoacceptor domain	3
24	Phaglo1	loss	IPR003689	P	Zinc/iron permease	4
24	Phaglo1	loss	IPR003819	P	TauD/TfdA-like domain	7
24	Phaglo1	loss	IPR003864	P	CSC1/OSCA1-like, 7TM region	2
24	Phaglo1	loss	IPR003877	S	SPRY domain	2
24	Phaglo1	loss	IPR003961	W	Fibronectin type III	5
24	Phaglo1	loss	IPR004000	Z	Actin family	3
24	Phaglo1	loss	IPR004045	R	Glutathione S-transferase, N-terminal	8
24	Phaglo1	loss	IPR004046	R	Glutathione S-transferase, C-terminal	7
24	Phaglo1	loss	IPR004088	A	K Homology domain, type 1	5
24	Phaglo1	loss	IPR004104	R	Oxidoreductase, C-terminal	2
24	Phaglo1	loss	IPR004147	R	UbiB domain	5
24	Phaglo1	loss	IPR004263	W	Exostosin-like	8
24	Phaglo1	loss	IPR004273	Z	Dynein heavy chain region D6 P-loop domain	6
24	Phaglo1	loss	IPR004302	M	Cellulose/chitin-binding protein, N-terminal	3
24	Phaglo1	loss	IPR004342	T	EXS, C-terminal	4
24	Phaglo1	loss	IPR004481	P	Sodium/potassium/calcium exchanger	2
24	Phaglo1	loss	IPR004837	P	Sodium/calcium exchanger membrane region	6
24	Phaglo1	loss	IPR004839	E	Aminotransferase, class I/classII	6
24	Phaglo1	loss	IPR004853	G	Sugar phosphate transporter domain	7
24	Phaglo1	loss	IPR005114	K	Helicase-associated	3
24	Phaglo1	loss	IPR005117	P	Nitrite/Sulfite reductase ferredoxin-like domain	2
24	Phaglo1	loss	IPR005135	R	Endonuclease/exonuclease/phosphatase	6
24	Phaglo1	loss	IPR005804	I	Fatty acid desaturase domain	12
24	Phaglo1	loss	IPR005828	G	Major facilitator, sugar transporter-like	5
24	Phaglo1	loss	IPR005936	O	Peptidase, FtsH	4
24	Phaglo1	loss	IPR005952	G	Phosphoglycerate mutase 1	4
24	Phaglo1	loss	IPR006043	H	Xanthine/uracil/vitamin C permease	2
24	Phaglo1	loss	IPR006067	P	Nitrite/sulphite reductase 4Fe-4S domain	2
24	Phaglo1	loss	IPR006073	R	GTP binding domain	11
24	Phaglo1	loss	IPR006102	G	Glycoside hydrolase, family 2, immunoglobulin-like beta-sandwich	2
24	Phaglo1	loss	IPR006104	G	Glycosyl hydrolases family 2, sugar binding domain	2
24	Phaglo1	loss	IPR006121	P	Heavy metal-associated domain, HMA	4
24	Phaglo1	loss	IPR006153	P	Cation/H+ exchanger	8
24	Phaglo1	loss	IPR006311	U	Twin-arginine translocation pathway, signal sequence	4
24	Phaglo1	loss	IPR006634	I	TRAM/LAG1/CLN8 homology domain	5
24	Phaglo1	loss	IPR006652	R	Kelch repeat type 1	9
24	Phaglo1	loss	IPR006813	G	Glycosyl transferase, family 17	3
24	Phaglo1	loss	IPR006935	L	Helicase/UvrB, N-terminal	4
24	Phaglo1	loss	IPR007130	I	Diacylglycerol acyltransferase	8
24	Phaglo1	loss	IPR007197	R	Radical SAM	6
24	Phaglo1	loss	IPR007248	U	Mpv17/PMP22	10
24	Phaglo1	loss	IPR007271	G	Nucleotide-sugar transporter	4
24	Phaglo1	loss	IPR007502	A	Helicase-associated domain	5
24	Phaglo1	loss	IPR007603	I	Choline transporter-like	6
24	Phaglo1	loss	IPR007627	K	RNA polymerase sigma-70 region 2	2
24	Phaglo1	loss	IPR007630	K	RNA polymerase sigma-70 region 4	2
24	Phaglo1	loss	IPR007632	P	Anoctamin	7
24	Phaglo1	loss	IPR007848	R	Methyltransferase small domain	2
24	Phaglo1	loss	IPR007867	R	Glucose-methanol-choline oxidoreductase, C-terminal	3
24	Phaglo1	loss	IPR008217	P	Ccc1 family	2
24	Phaglo1	loss	IPR008333	C	Flavoprotein pyridine nucleotide cytochrome reductase-like, FAD-binding domain	3
24	Phaglo1	loss	IPR008521	P	Magnesium transporter NIPA	5
24	Phaglo1	loss	IPR008775	I	Phytanoyl-CoA dioxygenase	5
24	Phaglo1	loss	IPR008884	Q	Macrocin-O-methyltransferase	4
24	Phaglo1	loss	IPR009056	C	Cytochrome c-like domain	3
24	Phaglo1	loss	IPR009769	T	Protein ENHANCED DISEASE RESISTANCE 2, C-terminal	5
24	Phaglo1	loss	IPR010987	R	Glutathione S-transferase, C-terminal-like	10
24	Phaglo1	loss	IPR011124	B	Zinc finger, CW-type	4
24	Phaglo1	loss	IPR011527	R	ABC transporter type 1, transmembrane domain	8
24	Phaglo1	loss	IPR011547	P	SLC26A/SulP transporter domain	4
24	Phaglo1	loss	IPR011629	H	Cobalamin (vitamin B12) biosynthesis CobW-like, C-terminal	3
24	Phaglo1	loss	IPR011705	O	BTB/Kelch-associated	8
24	Phaglo1	loss	IPR011761	E	ATP-grasp fold	9
24	Phaglo1	loss	IPR012317	F	Poly(ADP-ribose) polymerase, catalytic domain	3
24	Phaglo1	loss	IPR012336	C	Thioredoxin-like fold	5
24	Phaglo1	loss	IPR013057	E	Amino acid transporter, transmembrane domain	4
24	Phaglo1	loss	IPR013078	G	Histidine phosphatase superfamily, clade-1	6
24	Phaglo1	loss	IPR013094	R	Alpha/beta hydrolase fold-3	8
24	Phaglo1	loss	IPR013111	T	EGF-like domain, extracellular	3
24	Phaglo1	loss	IPR013122	T	Polycystin cation channel, PKD1/PKD2	5
24	Phaglo1	loss	IPR013149	R	Alcohol dehydrogenase, C-terminal	7
24	Phaglo1	loss	IPR013154	R	Alcohol dehydrogenase, N-terminal	5
24	Phaglo1	loss	IPR013216	R	Methyltransferase type 11	4
24	Phaglo1	loss	IPR013525	R	ABC-2 type transporter	6
24	Phaglo1	loss	IPR013584	A	RAP domain	4
24	Phaglo1	loss	IPR013602	Z	Dynein heavy chain, domain-2	5
24	Phaglo1	loss	IPR013658	R	SMP-30/Gluconolactonase/LRE-like region	3
24	Phaglo1	loss	IPR013750	R	GHMP kinase, C-terminal domain	5
24	Phaglo1	loss	IPR014043	I	Acyl transferase	2
24	Phaglo1	loss	IPR014830	M	Glycolipid transfer protein domain	3
24	Phaglo1	loss	IPR015655	O	Protein phosphatase 2C family	8
24	Phaglo1	loss	IPR015798	E	Copper amine oxidase, catalytic domain	2
24	Phaglo1	loss	IPR015940	R	Ubiquitin-associated domain	3
24	Phaglo1	loss	IPR016040	C	NAD(P)-binding domain	4
24	Phaglo1	loss	IPR016137	T	RGS domain	5
24	Phaglo1	loss	IPR016158	O	Cullin homology domain	2
24	Phaglo1	loss	IPR017441	T	Protein kinase, ATP binding site	4
24	Phaglo1	loss	IPR017884	K	SANT domain	3
24	Phaglo1	loss	IPR017927	C	FAD-binding domain, ferredoxin reductase-type	5
24	Phaglo1	loss	IPR018422	P	Cation/H+ exchanger, CPA1 family	5
24	Phaglo1	loss	IPR018957	K	Zinc finger, C3HC4 RING-type	8
24	Phaglo1	loss	IPR019410	O	Lysine methyltransferase	6
24	Phaglo1	loss	IPR020422	O	Dual specificity protein phosphatase domain	6
24	Phaglo1	loss	IPR020471	R	Aldo/keto reductase	5
24	Phaglo1	loss	IPR021134	P	Bestrophin/UPF0187	9
24	Phaglo1	loss	IPR022742	O	Serine aminopeptidase, S33	5
24	Phaglo1	loss	IPR022764	O	Peptidase S54, rhomboid domain	4
24	Phaglo1	loss	IPR023186	F	Inosine/uridine-preferring nucleoside hydrolase	2
24	Phaglo1	loss	IPR023210	R	NADP-dependent oxidoreductase domain	11
24	Phaglo1	loss	IPR023362	U	PH-BEACH domain	2
24	Phaglo1	loss	IPR024317	Z	Dynein heavy chain, AAA module D4	4
24	Phaglo1	loss	IPR024743	Z	Dynein heavy chain, coiled coil stalk	4
24	Phaglo1	loss	IPR025110	R	AMP-binding enzyme, C-terminal domain	6
24	Phaglo1	loss	IPR025714	R	Methyltransferase domain	4
24	Phaglo1	loss	IPR025789	B	Histone-lysine N-methyltransferase DOT1 domain	3
24	Phaglo1	loss	IPR025799	O	Protein arginine N-methyltransferase	5
24	Phaglo1	loss	IPR025875	R	Leucine rich repeat 4	4
24	Phaglo1	loss	IPR026847	U	Vacuolar protein sorting-associated protein 13	5
24	Phaglo1	loss	IPR026891	S	Fibronectin type III-like domain	6
24	Phaglo1	loss	IPR026913	S	Methyltransferase-like protein 24	4
24	Phaglo1	loss	IPR026992	R	Non-haem dioxygenase N-terminal domain	2
24	Phaglo1	loss	IPR027370	R	RING-type zinc-finger, LisH dimerisation motif	4
24	Phaglo1	loss	IPR027815	R	10TM putative phosphate transporter, cytosolic domain	3
24	Phaglo1	loss	IPR028325	T	Voltage-gated potassium channel	6
24	Phaglo1	loss	IPR028427	O	Peptide methionine sulfoxide reductase	2
24	Phaglo1	loss	IPR030392	O	Intramolecular chaperone auto-processing domain	3
24	Phaglo1	loss	IPR031127	O	E3 ubiquitin ligase RBR family	4
24	Phaglo1	loss	IPR031468	U	Synaptotagmin-like mitochondrial-lipid-binding domain	2
24	Phaglo1	loss	IPR033078	W	Tenascin-C	7
24	Phaglo1	loss	IPR033443	A	Pentacotripeptide-repeat region of PRORP	6
24	Phaglo1	loss	IPR035699	Z	Dynein heavy chain, hydrolytic ATP-binding dynein motor region	3
24	Phaglo1	loss	IPR035706	Z	Dynein heavy chain, ATP-binding dynein motor region	4
24	Phaglo1	loss	IPR037359	W	Heparan sulfate sulfotransferase	6
24	Phaglo1	loss	IPR037516	T	Tripartite DENN domain	3
24	Phaglo1	loss	IPR039448	R	Right handed beta helix domain	3
24	Phaglo1	loss	IPR041228	Z	Dynein heavy chain, C-terminal domain	7
24	Phaglo1	loss	IPR041466	Z	Dynein heavy chain, AAA 5 extension domain	3
24	Phaglo1	loss	IPR041569	R	AAA ATPase, AAA+ lid domain	7
24	Phaglo1	loss	IPR041589	Z	Dynein heavy chain 3, AAA+ lid domain	4
24	Phaglo1	loss	IPR041658	Z	Dynein heavy chain AAA lid domain	5
24	Phaglo1	loss	IPR041679	L	DNA2/NAM7 helicase-like, AAA domain	4
24	Phaglo1	loss	IPR043203	T	Voltage-gated cation channel calcium and sodium	5
24	Phaglo1	loss	IPR043211	T	TNF receptor-associated factor TRAF	2
24	Phaglo1	loss	IPR043533	T	Cyclic nucleotide-binding domain-containing protein 1/2	3
24	Phaglo1	loss	IPR044053	Q	Hydroxylase/desaturase AsaB-like	3
24	Phaglo1	loss	IPR044066	O	TRIAD supradomain	5
24	Phaglo1	loss	IPR044669	S	UPF0187 family	6
24	Phaglo1	loss	IPR044808	K	Ethylene-responsive transcription factor	2
24	Phaglo1	loss	IPR044845	O	Glycosyltransferase HPAT/SRGT1-like	5
24	Phaglo1	loss	IPR045054	O	Prolyl 4-hydroxylase	13
24	Phaglo1	loss	IPR045055	A	DNA2/NAM7-like helicase	6
24	Phaglo1	loss	IPR045100	A	TUTase nucleotidyltransferase domain	2
24	Phaglo1	loss	IPR045122	T	Calcium permeable stress-gated cation channel 1-like	4
25		gain	IPR000261	T	EH domain	6
25		gain	IPR000269	E	Copper amine oxidase	2
25		gain	IPR000626	O	Ubiquitin-like domain	16
25		gain	IPR000863	P	Sulfotransferase domain	8
25		gain	IPR001002	M	Chitin-binding, type 1	8
25		gain	IPR001223	G	Glycoside hydrolase family 18, catalytic domain	7
25		gain	IPR001320	E	Ionotropic glutamate receptor, C-terminal	4
25		gain	IPR001425	C	Archaeal/bacterial/fungal rhodopsins	9
25		gain	IPR001461	O	Aspartic peptidase A1 family	7
25		gain	IPR001675	G	Glycosyl transferase family 29	10
25		gain	IPR001807	P	Chloride channel, voltage gated	5
25		gain	IPR001828	T	Receptor, ligand binding region	7
25		gain	IPR001910	F	Inosine/uridine-preferring nucleoside hydrolase domain	6
25		gain	IPR002109	C	Glutaredoxin	7
25		gain	IPR002182	T	NB-ARC	5
25		gain	IPR002350	O	Kazal domain	4
25		gain	IPR002455	T	GPCR family 3, GABA-B receptor	2
25		gain	IPR002659	G	Glycosyl transferase, family 31	14
25		gain	IPR003582	O	ShKT domain	16
25		gain	IPR004263	W	Exostosin-like	18
25		gain	IPR004853	G	Sugar phosphate transporter domain	12
25		gain	IPR005331	W	Sulfotransferase	29
25		gain	IPR006201	T	Neurotransmitter-gated ion-channel	8
25		gain	IPR006202	T	Neurotransmitter-gated ion-channel ligand-binding domain	8
25		gain	IPR006311	U	Twin-arginine translocation pathway, signal sequence	8
25		gain	IPR006652	R	Kelch repeat type 1	21
25		gain	IPR007657	G	Glycosyltransferase 61	12
25		gain	IPR011598	K	Myc-type, basic helix-loop-helix (bHLH) domain	2
25		gain	IPR011705	O	BTB/Kelch-associated	20
25		gain	IPR013017	T	NHL repeat, subgroup	7
25		gain	IPR015798	E	Copper amine oxidase, catalytic domain	2
25		gain	IPR017978	T	GPCR family 3, C-terminal	2
25		gain	IPR021134	P	Bestrophin/UPF0187	14
25		gain	IPR021838	S	Protein of unknown function DUF3431	9
25		gain	IPR023210	R	NADP-dependent oxidoreductase domain	11
25		gain	IPR024983	O	CHAT domain	5
25		gain	IPR025875	R	Leucine rich repeat 4	7
25		gain	IPR026913	S	Methyltransferase-like protein 24	7
25		gain	IPR030392	O	Intramolecular chaperone auto-processing domain	2
25		gain	IPR033121	O	Peptidase family A1 domain	8
25		gain	IPR037359	W	Heparan sulfate sulfotransferase	9
25		loss	IPR002156	A	Ribonuclease H domain	5
25		loss	IPR044808	K	Ethylene-responsive transcription factor	4
26	Phacor1	gain	IPR000001	T	Kringle	5
26	Phacor1	gain	IPR000086	R	NUDIX hydrolase domain	9
26	Phacor1	gain	IPR000157	T	Toll/interleukin-1 receptor homology (TIR) domain	11
26	Phacor1	gain	IPR000195	U	Rab-GTPase-TBC domain	5
26	Phacor1	gain	IPR000203	T	GPS motif	13
26	Phacor1	gain	IPR000212	L	DNA helicase, UvrD/REP type	4
26	Phacor1	gain	IPR000219	T	Dbl homology (DH) domain	9
26	Phacor1	gain	IPR000253	R	Forkhead-associated (FHA) domain	9
26	Phacor1	gain	IPR000261	T	EH domain	11
26	Phacor1	gain	IPR000306	R	FYVE zinc finger	6
26	Phacor1	gain	IPR000313	R	PWWP domain	4
26	Phacor1	gain	IPR000322	G	Glycoside hydrolase family 31	4
26	Phacor1	gain	IPR000330	K	SNF2, N-terminal	17
26	Phacor1	gain	IPR000340	O	Dual specificity phosphatase, catalytic domain	6
26	Phacor1	gain	IPR000408	B	Regulator of chromosome condensation, RCC1	11
26	Phacor1	gain	IPR000421	T	Coagulation factor 5/8 C-terminal domain	5
26	Phacor1	gain	IPR000668	O	Peptidase C1A, papain C-terminal	12
26	Phacor1	gain	IPR000768	O	NAD:arginine ADP-ribosyltransferase, ART	14
26	Phacor1	gain	IPR000961	T	AGC-kinase, C-terminal	7
26	Phacor1	gain	IPR001190	T	SRCR domain	3
26	Phacor1	gain	IPR001293	T	Zinc finger, TRAF-type	5
26	Phacor1	gain	IPR001300	T	Peptidase C2, calpain, catalytic domain	5
26	Phacor1	gain	IPR001320	E	Ionotropic glutamate receptor, C-terminal	7
26	Phacor1	gain	IPR001357	L	BRCT domain	6
26	Phacor1	gain	IPR001394	O	Peptidase C19, ubiquitin carboxyl-terminal hydrolase	6
26	Phacor1	gain	IPR001452	R	SH3 domain	5
26	Phacor1	gain	IPR001466	R	Beta-lactamase-related	7
26	Phacor1	gain	IPR001509	G	NAD-dependent epimerase/dehydratase	6
26	Phacor1	gain	IPR001510	L	Zinc finger, PARP-type	5
26	Phacor1	gain	IPR001547	G	Glycoside hydrolase, family 5	11
26	Phacor1	gain	IPR001563	O	Peptidase S10, serine carboxypeptidase	6
26	Phacor1	gain	IPR001660	A	Sterile alpha motif domain	10
26	Phacor1	gain	IPR001675	G	Glycosyl transferase family 29	13
26	Phacor1	gain	IPR001678	J	SAM-dependent methyltransferase RsmB/NOP2-type	6
26	Phacor1	gain	IPR001683	T	Phox homology	8
26	Phacor1	gain	IPR001722	G	Glycoside hydrolase, family 7	4
26	Phacor1	gain	IPR001763	T	Rhodanese-like domain	7
26	Phacor1	gain	IPR001764	G	Glycoside hydrolase, family 3, N-terminal	6
26	Phacor1	gain	IPR001810	O	F-box domain	13
26	Phacor1	gain	IPR001943	L	UVR domain	3
26	Phacor1	gain	IPR002083	O	MATH/TRAF domain	3
26	Phacor1	gain	IPR002241	G	Glycoside hydrolase, family 27	6
26	Phacor1	gain	IPR002372	C	Pyrrolo-quinoline quinone repeat	4
26	Phacor1	gain	IPR002498	T	Phosphatidylinositol-4-phosphate 5-kinase, core	8
26	Phacor1	gain	IPR002528	Q	Multi antimicrobial extrusion protein	6
26	Phacor1	gain	IPR002654	G	Glycosyl transferase, family 25	6
26	Phacor1	gain	IPR002656	O	Acyltransferase 3 domain	5
26	Phacor1	gain	IPR002659	G	Glycosyl transferase, family 31	13
26	Phacor1	gain	IPR002772	G	Glycoside hydrolase family 3 C-terminal domain	5
26	Phacor1	gain	IPR002885	A	Pentatricopeptide repeat	12
26	Phacor1	gain	IPR002937	E	Amine oxidase	6
26	Phacor1	gain	IPR003100	A	PAZ domain	3
26	Phacor1	gain	IPR003123	U	VPS9 domain	7
26	Phacor1	gain	IPR003540	O	ADP ribosyltransferase	4
26	Phacor1	gain	IPR003819	P	TauD/TfdA-like domain	12
26	Phacor1	gain	IPR003877	S	SPRY domain	7
26	Phacor1	gain	IPR003961	W	Fibronectin type III	20
26	Phacor1	gain	IPR004045	R	Glutathione S-transferase, N-terminal	9
26	Phacor1	gain	IPR004088	A	K Homology domain, type 1	6
26	Phacor1	gain	IPR004170	O	WWE domain	4
26	Phacor1	gain	IPR004263	W	Exostosin-like	17
26	Phacor1	gain	IPR004273	Z	Dynein heavy chain region D6 P-loop domain	7
26	Phacor1	gain	IPR004302	M	Cellulose/chitin-binding protein, N-terminal	4
26	Phacor1	gain	IPR004304	E	Acetamidase/Formamidase	3
26	Phacor1	gain	IPR004344	N	Tubulin-tyrosine ligase/Tubulin polyglutamylase	7
26	Phacor1	gain	IPR004837	P	Sodium/calcium exchanger membrane region	6
26	Phacor1	gain	IPR004843	T	Calcineurin-like phosphoesterase domain, ApaH type	13
26	Phacor1	gain	IPR005025	R	NADPH-dependent FMN reductase-like	3
26	Phacor1	gain	IPR005114	K	Helicase-associated	10
26	Phacor1	gain	IPR005135	R	Endonuclease/exonuclease/phosphatase	9
26	Phacor1	gain	IPR006073	R	GTP binding domain	7
26	Phacor1	gain	IPR006179	F	5'-Nucleotidase/apyrase	4
26	Phacor1	gain	IPR006330	F	Adenosine/adenine deaminase	5
26	Phacor1	gain	IPR006598	O	Glycosyl transferase CAP10 domain	15
26	Phacor1	gain	IPR006652	R	Kelch repeat type 1	10
26	Phacor1	gain	IPR007110	W	Immunoglobulin-like domain	3
26	Phacor1	gain	IPR007248	U	Mpv17/PMP22	8
26	Phacor1	gain	IPR007312	I	Phosphoesterase	6
26	Phacor1	gain	IPR007577	G	Glycosyltransferase, DXD sugar-binding motif	14
26	Phacor1	gain	IPR007657	G	Glycosyltransferase 61	14
26	Phacor1	gain	IPR007848	R	Methyltransferase small domain	4
26	Phacor1	gain	IPR008521	P	Magnesium transporter NIPA	6
26	Phacor1	gain	IPR008630	G	Glycosyltransferase 34	4
26	Phacor1	gain	IPR008775	I	Phytanoyl-CoA dioxygenase	24
26	Phacor1	gain	IPR010987	R	Glutathione S-transferase, C-terminal-like	12
26	Phacor1	gain	IPR011124	B	Zinc finger, CW-type	13
26	Phacor1	gain	IPR011547	P	SLC26A/SulP transporter domain	6
26	Phacor1	gain	IPR011641	T	Tyrosine-protein kinase ephrin type A/B receptor-like	6
26	Phacor1	gain	IPR011705	O	BTB/Kelch-associated	12
26	Phacor1	gain	IPR012317	F	Poly(ADP-ribose) polymerase, catalytic domain	9
26	Phacor1	gain	IPR013017	T	NHL repeat, subgroup	8
26	Phacor1	gain	IPR013078	G	Histidine phosphatase superfamily, clade-1	17
26	Phacor1	gain	IPR013111	T	EGF-like domain, extracellular	4
26	Phacor1	gain	IPR013122	T	Polycystin cation channel, PKD1/PKD2	9
26	Phacor1	gain	IPR013201	O	Cathepsin propeptide inhibitor domain (I29)	5
26	Phacor1	gain	IPR013517	W	FG-GAP repeat	6
26	Phacor1	gain	IPR013519	W	Integrin alpha beta-propellor	4
26	Phacor1	gain	IPR013594	Z	Dynein heavy chain, domain-1	4
26	Phacor1	gain	IPR013602	Z	Dynein heavy chain, domain-2	11
26	Phacor1	gain	IPR013657	R	UAA transporter	5
26	Phacor1	gain	IPR013767	T	PAS fold	3
26	Phacor1	gain	IPR013968	Q	Polyketide synthase, ketoreductase domain	6
26	Phacor1	gain	IPR015798	E	Copper amine oxidase, catalytic domain	3
26	Phacor1	gain	IPR015914	R	Purple acid phosphatase, N-terminal	3
26	Phacor1	gain	IPR015940	R	Ubiquitin-associated domain	15
26	Phacor1	gain	IPR017455	R	Zinc finger, FYVE-related	6
26	Phacor1	gain	IPR017868	Z	Filamin/ABP280 repeat-like	12
26	Phacor1	gain	IPR018422	P	Cation/H+ exchanger, CPA1 family	5
26	Phacor1	gain	IPR018946	R	Alkaline phosphatase D-related	3
26	Phacor1	gain	IPR018957	K	Zinc finger, C3HC4 RING-type	6
26	Phacor1	gain	IPR019378	O	GDP-fucose protein O-fucosyltransferase	5
26	Phacor1	gain	IPR019410	O	Lysine methyltransferase	16
26	Phacor1	gain	IPR019786	K	Zinc finger, PHD-type, conserved site	11
26	Phacor1	gain	IPR019787	K	Zinc finger, PHD-finger	14
26	Phacor1	gain	IPR020471	R	Aldo/keto reductase	10
26	Phacor1	gain	IPR021134	P	Bestrophin/UPF0187	8
26	Phacor1	gain	IPR021838	S	Protein of unknown function DUF3431	8
26	Phacor1	gain	IPR022099	S	Protein of unknown function DUF3638	5
26	Phacor1	gain	IPR022105	S	Protein of unknown function DUF3645	5
26	Phacor1	gain	IPR023210	R	NADP-dependent oxidoreductase domain	10
26	Phacor1	gain	IPR023379	F	BART domain	8
26	Phacor1	gain	IPR023610	T	Phosphatidylinositol-4-phosphate 5-kinase	6
26	Phacor1	gain	IPR023631	E	Amidase signature domain	6
26	Phacor1	gain	IPR024317	Z	Dynein heavy chain, AAA module D4	7
26	Phacor1	gain	IPR024743	Z	Dynein heavy chain, coiled coil stalk	5
26	Phacor1	gain	IPR024983	O	CHAT domain	7
26	Phacor1	gain	IPR025640	R	GYF domain 2	6
26	Phacor1	gain	IPR025714	R	Methyltransferase domain	14
26	Phacor1	gain	IPR025733	R	Iron/zinc purple acid phosphatase-like C-terminal domain	3
26	Phacor1	gain	IPR025789	B	Histone-lysine N-methyltransferase DOT1 domain	5
26	Phacor1	gain	IPR026854	U	Vacuolar protein sorting-associated protein 13, N-terminal domain	8
26	Phacor1	gain	IPR026913	S	Methyltransferase-like protein 24	12
26	Phacor1	gain	IPR026983	Z	Dynein heavy chain	5
26	Phacor1	gain	IPR026992	R	Non-haem dioxygenase N-terminal domain	7
26	Phacor1	gain	IPR027640	Z	Kinesin-like protein	16
26	Phacor1	gain	IPR028325	T	Voltage-gated potassium channel	6
26	Phacor1	gain	IPR028889	O	Ubiquitin specific protease domain	6
26	Phacor1	gain	IPR029023	T	Tensin-type phosphatase domain	4
26	Phacor1	gain	IPR029489	O	O-GlcNAc transferase, C-terminal	8
26	Phacor1	gain	IPR030392	O	Intramolecular chaperone auto-processing domain	5
26	Phacor1	gain	IPR030616	D	Aurora kinase	4
26	Phacor1	gain	IPR031646	U	Vacuolar protein sorting-associated protein 13, second N-terminal domain	6
26	Phacor1	gain	IPR031649	T	Voltage-dependent L-type calcium channel, IQ-associated domain	5
26	Phacor1	gain	IPR033121	O	Peptidase family A1 domain	6
26	Phacor1	gain	IPR035699	Z	Dynein heavy chain, hydrolytic ATP-binding dynein motor region	9
26	Phacor1	gain	IPR035706	Z	Dynein heavy chain, ATP-binding dynein motor region	7
26	Phacor1	gain	IPR037516	T	Tripartite DENN domain	5
26	Phacor1	gain	IPR037919	O	UDP-N-acetylglucosamine--peptide N-acetylglucosaminyltransferase 110kDa subunit	5
26	Phacor1	gain	IPR039038	O	Aspartyl/asparaginyl beta-hydroxylase family	4
26	Phacor1	gain	IPR040626	O	Cytosolic carboxypeptidase, N-terminal	4
26	Phacor1	gain	IPR040632	Q	Sulfotransferase, S. mansonii-type	6
26	Phacor1	gain	IPR041228	Z	Dynein heavy chain, C-terminal domain	8
26	Phacor1	gain	IPR041466	Z	Dynein heavy chain, AAA 5 extension domain	8
26	Phacor1	gain	IPR041491	T	TRPM, SLOG domain	18
26	Phacor1	gain	IPR041589	Z	Dynein heavy chain 3, AAA+ lid domain	6
26	Phacor1	gain	IPR041658	Z	Dynein heavy chain AAA lid domain	5
26	Phacor1	gain	IPR041667	K	Cupin-like domain 8	21
26	Phacor1	gain	IPR043203	T	Voltage-gated cation channel calcium and sodium	6
26	Phacor1	gain	IPR043533	T	Cyclic nucleotide-binding domain-containing protein 1/2	5
26	Phacor1	gain	IPR044053	Q	Hydroxylase/desaturase AsaB-like	5
26	Phacor1	gain	IPR044831	C	Heme-binding peroxidase Ccp1-like	3
26	Phacor1	gain	IPR044861	Q	Isopenicillin N synthase-like, Fe(2+) 2OG dioxygenase domain	8
26	Phacor1	gain	IPR045052	U	Copine	2
26	Phacor1	gain	IPR045054	O	Prolyl 4-hydroxylase	11
26	Phacor1	gain	IPR045063	U	Dynamin, N-terminal	5
26	Phacor1	gain	IPR045156	U	Vacuolar protein 8	7
26	Phacor1	loss	IPR002213	G	UDP-glucuronosyl/UDP-glucosyltransferase	2
26	Phacor1	loss	IPR002921	I	Fungal lipase-like domain	6
26	Phacor1	loss	IPR006094	C	FAD linked oxidase, N-terminal	4
26	Phacor1	loss	IPR007125	B	Histone H2A/H2B/H3	5
26	Phacor1	loss	IPR025476	B	Helitron helicase-like domain	2
26	Phacor1	loss	IPR035425	B	CENP-T/Histone H4, histone fold	3
26	Phacor1	loss	IPR044808	K	Ethylene-responsive transcription factor	2
27		gain	IPR000961	T	AGC-kinase, C-terminal	5
27		gain	IPR001660	A	Sterile alpha motif domain	4
27		gain	IPR002182	T	NB-ARC	2
27		gain	IPR003440	G	Glycosyl transferase, family 48	4
27		gain	IPR003961	W	Fibronectin type III	5
27		gain	IPR004263	W	Exostosin-like	6
27		gain	IPR005331	W	Sulfotransferase	11
27		gain	IPR013122	T	Polycystin cation channel, PKD1/PKD2	4
27		gain	IPR028325	T	Voltage-gated potassium channel	4
27		gain	IPR037359	W	Heparan sulfate sulfotransferase	4
27		gain	IPR040632	Q	Sulfotransferase, S. mansonii-type	5
28	Phaeo-sis	gain	IPR000198	T	Rho GTPase-activating protein domain	7
28	Phaeo-sis	gain	IPR000219	T	Dbl homology (DH) domain	7
28	Phaeo-sis	gain	IPR000408	B	Regulator of chromosome condensation, RCC1	20
28	Phaeo-sis	gain	IPR000772	M	Ricin B, lectin domain	5
28	Phaeo-sis	gain	IPR000859	T	CUB domain	6
28	Phaeo-sis	gain	IPR000909	T	Phosphatidylinositol-specific phospholipase C, X domain	9
28	Phaeo-sis	gain	IPR000961	T	AGC-kinase, C-terminal	19
28	Phaeo-sis	gain	IPR001173	G	Glycosyltransferase 2-like	9
28	Phaeo-sis	gain	IPR001192	T	Phosphoinositide phospholipase C family	11
28	Phaeo-sis	gain	IPR001254	O	Serine proteases, trypsin domain	16
28	Phaeo-sis	gain	IPR001452	R	SH3 domain	16
28	Phaeo-sis	gain	IPR001466	R	Beta-lactamase-related	9
28	Phaeo-sis	gain	IPR001660	A	Sterile alpha motif domain	19
28	Phaeo-sis	gain	IPR001678	J	SAM-dependent methyltransferase RsmB/NOP2-type	9
28	Phaeo-sis	gain	IPR001683	T	Phox homology	12
28	Phaeo-sis	gain	IPR001722	G	Glycoside hydrolase, family 7	5
28	Phaeo-sis	gain	IPR002073	T	3'5'-cyclic nucleotide phosphodiesterase, catalytic domain	8
28	Phaeo-sis	gain	IPR002498	T	Phosphatidylinositol-4-phosphate 5-kinase, core	8
28	Phaeo-sis	gain	IPR002656	O	Acyltransferase 3 domain	7
28	Phaeo-sis	gain	IPR002859	T	PKD/REJ-like domain	5
28	Phaeo-sis	gain	IPR003018	T	GAF domain	10
28	Phaeo-sis	gain	IPR003440	G	Glycosyl transferase, family 48	26
28	Phaeo-sis	gain	IPR003961	W	Fibronectin type III	28
28	Phaeo-sis	gain	IPR004344	N	Tubulin-tyrosine ligase/Tubulin polyglutamylase	11
28	Phaeo-sis	gain	IPR004481	P	Sodium/potassium/calcium exchanger	8
28	Phaeo-sis	gain	IPR005046	S	Protein of unknown function DUF285	39
28	Phaeo-sis	gain	IPR005331	W	Sulfotransferase	15
28	Phaeo-sis	gain	IPR006102	G	Glycoside hydrolase, family 2, immunoglobulin-like beta-sandwich	9
28	Phaeo-sis	gain	IPR006103	G	Glycoside hydrolase family 2, catalytic domain	8
28	Phaeo-sis	gain	IPR006104	G	Glycosyl hydrolases family 2, sugar binding domain	6
28	Phaeo-sis	gain	IPR006598	O	Glycosyl transferase CAP10 domain	13
28	Phaeo-sis	gain	IPR008166	G	Glycosyltransferase family 92	5
28	Phaeo-sis	gain	IPR013105	T	Tetratricopeptide repeat 2	8
28	Phaeo-sis	gain	IPR013111	T	EGF-like domain, extracellular	7
28	Phaeo-sis	gain	IPR013121	C	Ferric reductase, NAD binding domain	6
28	Phaeo-sis	gain	IPR013122	T	Polycystin cation channel, PKD1/PKD2	15
28	Phaeo-sis	gain	IPR013130	C	Ferric reductase transmembrane component-like domain	7
28	Phaeo-sis	gain	IPR013519	W	Integrin alpha beta-propellor	4
28	Phaeo-sis	gain	IPR013830	I	SGNH hydrolase-type esterase domain	10
28	Phaeo-sis	gain	IPR014030	I	Beta-ketoacyl synthase, N-terminal	11
28	Phaeo-sis	gain	IPR015353	R	Rubisco LSMT, substrate-binding domain	8
28	Phaeo-sis	gain	IPR016137	T	RGS domain	15
28	Phaeo-sis	gain	IPR019378	O	GDP-fucose protein O-fucosyltransferase	8
28	Phaeo-sis	gain	IPR022099	S	Protein of unknown function DUF3638	9
28	Phaeo-sis	gain	IPR022105	S	Protein of unknown function DUF3645	8
28	Phaeo-sis	gain	IPR023362	U	PH-BEACH domain	6
28	Phaeo-sis	gain	IPR026847	U	Vacuolar protein sorting-associated protein 13	10
28	Phaeo-sis	gain	IPR026899	G	1,3-beta-glucan synthase subunit FKS1-like, domain-1	18
28	Phaeo-sis	gain	IPR027815	R	10TM putative phosphate transporter, cytosolic domain	7
28	Phaeo-sis	gain	IPR028325	T	Voltage-gated potassium channel	11
28	Phaeo-sis	gain	IPR032808	S	DoxX family	4
28	Phaeo-sis	gain	IPR032861	M	Xylanase inhibitor, N-terminal	5
28	Phaeo-sis	gain	IPR033078	W	Tenascin-C	6
28	Phaeo-sis	gain	IPR037359	W	Heparan sulfate sulfotransferase	10
28	Phaeo-sis	gain	IPR040632	Q	Sulfotransferase, S. mansonii-type	13
28	Phaeo-sis	gain	IPR041664	L	Orc1-like, AAA ATPase domain	5
28	Phaeo-sis	gain	IPR041667	K	Cupin-like domain 8	24
28	Phaeo-sis	gain	IPR045053	M	Mannan endo-1,4-beta-mannosidase-like	8
28	Phaeo-sis	gain	IPR045122	T	Calcium permeable stress-gated cation channel 1-like	11
28	Phaeo-sis	loss	IPR000164	B	Histone H3/CENP-A	5
28	Phaeo-sis	loss	IPR000217	N	Tubulin	7
28	Phaeo-sis	loss	IPR000626	O	Ubiquitin-like domain	13
28	Phaeo-sis	loss	IPR000782	W	FAS1 domain	4
28	Phaeo-sis	loss	IPR001876	T	Zinc finger, RanBP2-type	5
28	Phaeo-sis	loss	IPR002938	C	FAD-binding domain	10
28	Phaeo-sis	loss	IPR004014	P	Cation-transporting P-type ATPase, N-terminal	6
28	Phaeo-sis	loss	IPR007125	B	Histone H2A/H2B/H3	10
28	Phaeo-sis	loss	IPR008011	C	Complex 1 LYR protein	4
28	Phaeo-sis	loss	IPR010865	S	Protein of unknown function DUF1499	5
28	Phaeo-sis	loss	IPR011705	O	BTB/Kelch-associated	12
28	Phaeo-sis	loss	IPR013584	A	RAP domain	11
28	Phaeo-sis	loss	IPR018316	N	Tubulin/FtsZ, 2-layer sandwich domain	5
29		gain	IPR000001	T	Kringle	9
29		gain	IPR000157	T	Toll/interleukin-1 receptor homology (TIR) domain	7
29		gain	IPR000219	T	Dbl homology (DH) domain	3
29		gain	IPR000253	R	Forkhead-associated (FHA) domain	13
29		gain	IPR000330	K	SNF2, N-terminal	13
29		gain	IPR000768	O	NAD:arginine ADP-ribosyltransferase, ART	3
29		gain	IPR000863	P	Sulfotransferase domain	6
29		gain	IPR001179	O	FKBP-type peptidyl-prolyl cis-trans isomerase domain	18
29		gain	IPR001192	T	Phosphoinositide phospholipase C family	4
29		gain	IPR001251	T	CRAL-TRIO lipid binding domain	13
29		gain	IPR001356	K	Homeobox domain	12
29		gain	IPR001547	G	Glycoside hydrolase, family 5	6
29		gain	IPR001675	G	Glycosyl transferase family 29	13
29		gain	IPR001683	T	Phox homology	9
29		gain	IPR001715	Z	Calponin homology domain	8
29		gain	IPR001810	O	F-box domain	14
29		gain	IPR001932	T	PPM-type phosphatase-like domain	13
29		gain	IPR002130	O	Cyclophilin-type peptidyl-prolyl cis-trans isomerase domain	13
29		gain	IPR002498	T	Phosphatidylinositol-4-phosphate 5-kinase, core	6
29		gain	IPR002659	G	Glycosyl transferase, family 31	9
29		gain	IPR002857	B	Zinc finger, CXXC-type	6
29		gain	IPR003034	R	SAP domain	12
29		gain	IPR003582	O	ShKT domain	22
29		gain	IPR003961	W	Fibronectin type III	8
29		gain	IPR004170	O	WWE domain	4
29		gain	IPR004263	W	Exostosin-like	16
29		gain	IPR004481	P	Sodium/potassium/calcium exchanger	5
29		gain	IPR004837	P	Sodium/calcium exchanger membrane region	11
29		gain	IPR004853	G	Sugar phosphate transporter domain	14
29		gain	IPR005046	S	Protein of unknown function DUF285	4
29		gain	IPR005331	W	Sulfotransferase	10
29		gain	IPR006201	T	Neurotransmitter-gated ion-channel	5
29		gain	IPR006311	U	Twin-arginine translocation pathway, signal sequence	8
29		gain	IPR007052	R	CS domain	11
29		gain	IPR007248	U	Mpv17/PMP22	9
29		gain	IPR007271	G	Nucleotide-sugar transporter	11
29		gain	IPR007577	G	Glycosyltransferase, DXD sugar-binding motif	7
29		gain	IPR007657	G	Glycosyltransferase 61	9
29		gain	IPR008521	P	Magnesium transporter NIPA	9
29		gain	IPR008775	I	Phytanoyl-CoA dioxygenase	16
29		gain	IPR009071	K	High mobility group box domain	9
29		gain	IPR010736	R	Sperm-tail PG-rich repeat	4
29		gain	IPR011705	O	BTB/Kelch-associated	6
29		gain	IPR012317	F	Poly(ADP-ribose) polymerase, catalytic domain	10
29		gain	IPR013017	T	NHL repeat, subgroup	4
29		gain	IPR013078	G	Histidine phosphatase superfamily, clade-1	14
29		gain	IPR013087	K	Zinc finger C2H2-type	8
29		gain	IPR013094	R	Alpha/beta hydrolase fold-3	6
29		gain	IPR013584	A	RAP domain	12
29		gain	IPR014017	L	UvrD-like DNA helicase, C-terminal	4
29		gain	IPR016137	T	RGS domain	4
29		gain	IPR017868	Z	Filamin/ABP280 repeat-like	9
29		gain	IPR018997	O	PUB domain	7
29		gain	IPR019410	O	Lysine methyltransferase	15
29		gain	IPR020471	R	Aldo/keto reductase	7
29		gain	IPR021134	P	Bestrophin/UPF0187	16
29		gain	IPR021884	M	Ice-binding protein-like	3
29		gain	IPR023210	R	NADP-dependent oxidoreductase domain	13
29		gain	IPR023379	F	BART domain	6
29		gain	IPR023610	T	Phosphatidylinositol-4-phosphate 5-kinase	5
29		gain	IPR023780	B	Chromo domain	22
29		gain	IPR026057	I	PC-Esterase	4
29		gain	IPR026983	Z	Dynein heavy chain	6
29		gain	IPR027640	Z	Kinesin-like protein	17
29		gain	IPR037359	W	Heparan sulfate sulfotransferase	6
29		gain	IPR041228	Z	Dynein heavy chain, C-terminal domain	7
29		gain	IPR041491	T	TRPM, SLOG domain	3
29		gain	IPR041667	K	Cupin-like domain 8	16
29		gain	IPR044669	S	UPF0187 family	12
29		gain	IPR044801	Z	Filamin family	4
29		gain	IPR044845	O	Glycosyltransferase HPAT/SRGT1-like	7
29		gain	IPR045054	O	Prolyl 4-hydroxylase	15
29		gain	IPR045156	U	Vacuolar protein 8	6
30	Pavlov2436	gain	IPR001765	G	Carbonic anhydrase	7
30	Pavlov2436	gain	IPR003661	T	Signal transduction histidine kinase, dimerisation/phosphoacceptor domain	23
30	Pavlov2436	gain	IPR007527	T	Zinc finger, SWIM-type	12
30	Pavlov2436	gain	IPR013087	K	Zinc finger C2H2-type	59
30	Pavlov2436	gain	IPR013584	A	RAP domain	34
30	Pavlov2436	gain	IPR021884	M	Ice-binding protein-like	34
30	Pavlov2436	loss	IPR000408	B	Regulator of chromosome condensation, RCC1	18
30	Pavlov2436	loss	IPR000873	I	AMP-dependent synthetase/ligase domain	12
30	Pavlov2436	loss	IPR001254	O	Serine proteases, trypsin domain	7
30	Pavlov2436	loss	IPR001466	R	Beta-lactamase-related	7
30	Pavlov2436	loss	IPR002035	W	von Willebrand factor, type A	13
30	Pavlov2436	loss	IPR002885	A	Pentatricopeptide repeat	16
30	Pavlov2436	loss	IPR002921	I	Fungal lipase-like domain	10
30	Pavlov2436	loss	IPR003034	R	SAP domain	13
30	Pavlov2436	loss	IPR004263	W	Exostosin-like	14
30	Pavlov2436	loss	IPR004843	T	Calcineurin-like phosphoesterase domain, ApaH type	16
30	Pavlov2436	loss	IPR005046	S	Protein of unknown function DUF285	6
30	Pavlov2436	loss	IPR006598	O	Glycosyl transferase CAP10 domain	11
30	Pavlov2436	loss	IPR006652	R	Kelch repeat type 1	10
30	Pavlov2436	loss	IPR007577	G	Glycosyltransferase, DXD sugar-binding motif	9
30	Pavlov2436	loss	IPR008884	Q	Macrocin-O-methyltransferase	5
30	Pavlov2436	loss	IPR009081	I	Phosphopantetheine binding ACP domain	8
30	Pavlov2436	loss	IPR011124	B	Zinc finger, CW-type	7
30	Pavlov2436	loss	IPR013057	E	Amino acid transporter, transmembrane domain	12
30	Pavlov2436	loss	IPR013099	P	Potassium channel domain	11
30	Pavlov2436	loss	IPR013517	W	FG-GAP repeat	8
30	Pavlov2436	loss	IPR017884	K	SANT domain	7
30	Pavlov2436	loss	IPR019410	O	Lysine methyltransferase	15
30	Pavlov2436	loss	IPR028325	T	Voltage-gated potassium channel	6
32	PelagoCCMP2097	gain	IPR001510	L	Zinc finger, PARP-type	6
32	PelagoCCMP2097	gain	IPR005114	K	Helicase-associated	8
32	PelagoCCMP2097	gain	IPR013584	A	RAP domain	12
32	PelagoCCMP2097	gain	IPR018997	O	PUB domain	5
32	PelagoCCMP2097	loss	IPR000164	B	Histone H3/CENP-A	4
32	PelagoCCMP2097	loss	IPR000232	K	Heat shock factor (HSF)-type, DNA-binding	8
32	PelagoCCMP2097	loss	IPR000558	B	Histone H2B	4
32	PelagoCCMP2097	loss	IPR000668	O	Peptidase C1A, papain C-terminal	10
32	PelagoCCMP2097	loss	IPR000873	I	AMP-dependent synthetase/ligase domain	11
32	PelagoCCMP2097	loss	IPR001173	G	Glycosyltransferase 2-like	6
32	PelagoCCMP2097	loss	IPR001179	O	FKBP-type peptidyl-prolyl cis-trans isomerase domain	11
32	PelagoCCMP2097	loss	IPR001394	O	Peptidase C19, ubiquitin carboxyl-terminal hydrolase	7
32	PelagoCCMP2097	loss	IPR001509	G	NAD-dependent epimerase/dehydratase	5
32	PelagoCCMP2097	loss	IPR001810	O	F-box domain	4
32	PelagoCCMP2097	loss	IPR002227	Q	Tyrosinase copper-binding domain	5
32	PelagoCCMP2097	loss	IPR003819	P	TauD/TfdA-like domain	4
32	PelagoCCMP2097	loss	IPR004000	Z	Actin family	5
32	PelagoCCMP2097	loss	IPR006202	T	Neurotransmitter-gated ion-channel ligand-binding domain	3
32	PelagoCCMP2097	loss	IPR007125	B	Histone H2A/H2B/H3	14
32	PelagoCCMP2097	loss	IPR011641	T	Tyrosine-protein kinase ephrin type A/B receptor-like	4
32	PelagoCCMP2097	loss	IPR013201	O	Cathepsin propeptide inhibitor domain (I29)	4
32	PelagoCCMP2097	loss	IPR013517	W	FG-GAP repeat	13
32	PelagoCCMP2097	loss	IPR014030	I	Beta-ketoacyl synthase, N-terminal	18
32	PelagoCCMP2097	loss	IPR014031	I	Beta-ketoacyl synthase, C-terminal	9
32	PelagoCCMP2097	loss	IPR018316	N	Tubulin/FtsZ, 2-layer sandwich domain	4
32	PelagoCCMP2097	loss	IPR023210	R	NADP-dependent oxidoreductase domain	11
32	PelagoCCMP2097	loss	IPR028889	O	Ubiquitin specific protease domain	7
32	PelagoCCMP2097	loss	IPR032454	B	Histone H2A, C-terminal domain	5
33		gain	IPR000961	T	AGC-kinase, C-terminal	8
33		gain	IPR001452	R	SH3 domain	7
33		gain	IPR002227	Q	Tyrosinase copper-binding domain	7
33		gain	IPR004481	P	Sodium/potassium/calcium exchanger	5
33		gain	IPR008775	I	Phytanoyl-CoA dioxygenase	11
33		gain	IPR013517	W	FG-GAP repeat	10
33		gain	IPR013528	H	Hydroxymethylglutaryl-coenzyme A synthase, N-terminal	3
33		gain	IPR013602	Z	Dynein heavy chain, domain-2	8
33		gain	IPR014030	I	Beta-ketoacyl synthase, N-terminal	13
33		gain	IPR016137	T	RGS domain	7
33		gain	IPR023379	F	BART domain	6
33		gain	IPR024317	Z	Dynein heavy chain, AAA module D4	7
33		gain	IPR024743	Z	Dynein heavy chain, coiled coil stalk	7
33		gain	IPR027640	Z	Kinesin-like protein	11
33		gain	IPR035699	Z	Dynein heavy chain, hydrolytic ATP-binding dynein motor region	7
33		gain	IPR035706	Z	Dynein heavy chain, ATP-binding dynein motor region	7
33		gain	IPR041589	Z	Dynein heavy chain 3, AAA+ lid domain	6
33		loss	IPR002068	O	Alpha crystallin/Hsp20 domain	4
33		loss	IPR002885	A	Pentatricopeptide repeat	18
34	Auran1	gain	IPR000001	T	Kringle	3
34	Auran1	gain	IPR000217	N	Tubulin	9
34	Auran1	gain	IPR000232	K	Heat shock factor (HSF)-type, DNA-binding	8
34	Auran1	gain	IPR000558	B	Histone H2B	10
34	Auran1	gain	IPR000569	O	HECT domain	7
34	Auran1	gain	IPR000668	O	Peptidase C1A, papain C-terminal	20
34	Auran1	gain	IPR000731	U	Sterol-sensing domain	5
34	Auran1	gain	IPR000772	M	Ricin B, lectin domain	6
34	Auran1	gain	IPR000873	I	AMP-dependent synthetase/ligase domain	19
34	Auran1	gain	IPR000961	T	AGC-kinase, C-terminal	10
34	Auran1	gain	IPR001173	G	Glycosyltransferase 2-like	9
34	Auran1	gain	IPR001179	O	FKBP-type peptidyl-prolyl cis-trans isomerase domain	21
34	Auran1	gain	IPR001199	C	Cytochrome b5-like heme/steroid binding domain	8
34	Auran1	gain	IPR001320	E	Ionotropic glutamate receptor, C-terminal	3
34	Auran1	gain	IPR001509	G	NAD-dependent epimerase/dehydratase	6
34	Auran1	gain	IPR001739	B	Methyl-CpG DNA binding	6
34	Auran1	gain	IPR001764	G	Glycoside hydrolase, family 3, N-terminal	4
34	Auran1	gain	IPR001828	T	Receptor, ligand binding region	4
34	Auran1	gain	IPR001932	T	PPM-type phosphatase-like domain	9
34	Auran1	gain	IPR002018	I	Carboxylesterase, type B	6
34	Auran1	gain	IPR002227	Q	Tyrosinase copper-binding domain	22
34	Auran1	gain	IPR002372	C	Pyrrolo-quinoline quinone repeat	4
34	Auran1	gain	IPR002579	O	Peptide methionine sulphoxide reductase MrsB domain	6
34	Auran1	gain	IPR002656	O	Acyltransferase 3 domain	7
34	Auran1	gain	IPR002859	T	PKD/REJ-like domain	12
34	Auran1	gain	IPR003008	N	Tubulin/FtsZ, GTPase domain	7
34	Auran1	gain	IPR003280	P	Two pore domain potassium channel	5
34	Auran1	gain	IPR003392	T	Protein patched/dispatched	5
34	Auran1	gain	IPR003495	R	CobW/HypB/UreG, nucleotide-binding domain	8
34	Auran1	gain	IPR004000	Z	Actin family	6
34	Auran1	gain	IPR004045	R	Glutathione S-transferase, N-terminal	12
34	Auran1	gain	IPR004046	R	Glutathione S-transferase, C-terminal	7
34	Auran1	gain	IPR004147	R	UbiB domain	13
34	Auran1	gain	IPR004170	O	WWE domain	3
34	Auran1	gain	IPR004273	Z	Dynein heavy chain region D6 P-loop domain	6
34	Auran1	gain	IPR004481	P	Sodium/potassium/calcium exchanger	9
34	Auran1	gain	IPR004837	P	Sodium/calcium exchanger membrane region	8
34	Auran1	gain	IPR004839	E	Aminotransferase, class I/classII	8
34	Auran1	gain	IPR004843	T	Calcineurin-like phosphoesterase domain, ApaH type	11
34	Auran1	gain	IPR004963	G	Pectinacetylesterase/NOTUM	4
34	Auran1	gain	IPR005828	G	Major facilitator, sugar transporter-like	7
34	Auran1	gain	IPR005952	G	Phosphoglycerate mutase 1	6
34	Auran1	gain	IPR006102	G	Glycoside hydrolase, family 2, immunoglobulin-like beta-sandwich	3
34	Auran1	gain	IPR006153	P	Cation/H+ exchanger	7
34	Auran1	gain	IPR006201	T	Neurotransmitter-gated ion-channel	6
34	Auran1	gain	IPR006202	T	Neurotransmitter-gated ion-channel ligand-binding domain	11
34	Auran1	gain	IPR007125	B	Histone H2A/H2B/H3	21
34	Auran1	gain	IPR008775	I	Phytanoyl-CoA dioxygenase	17
34	Auran1	gain	IPR009081	I	Phosphopantetheine binding ACP domain	9
34	Auran1	gain	IPR010262	Q	Arylsulfotransferase, bacteria	10
34	Auran1	gain	IPR010987	R	Glutathione S-transferase, C-terminal-like	10
34	Auran1	gain	IPR011641	T	Tyrosine-protein kinase ephrin type A/B receptor-like	11
34	Auran1	gain	IPR012668	S	Conserved hypothetical protein CHP02466	5
34	Auran1	gain	IPR013099	P	Potassium channel domain	12
34	Auran1	gain	IPR013201	O	Cathepsin propeptide inhibitor domain (I29)	9
34	Auran1	gain	IPR013517	W	FG-GAP repeat	44
34	Auran1	gain	IPR013528	H	Hydroxymethylglutaryl-coenzyme A synthase, N-terminal	17
34	Auran1	gain	IPR014030	I	Beta-ketoacyl synthase, N-terminal	58
34	Auran1	gain	IPR014031	I	Beta-ketoacyl synthase, C-terminal	25
34	Auran1	gain	IPR017455	R	Zinc finger, FYVE-related	5
34	Auran1	gain	IPR018316	N	Tubulin/FtsZ, 2-layer sandwich domain	7
34	Auran1	gain	IPR020471	R	Aldo/keto reductase	8
34	Auran1	gain	IPR020946	Q	Flavin monooxygenase-like	5
34	Auran1	gain	IPR023210	R	NADP-dependent oxidoreductase domain	24
34	Auran1	gain	IPR025110	R	AMP-binding enzyme, C-terminal domain	9
34	Auran1	gain	IPR028427	O	Peptide methionine sulfoxide reductase	5
34	Auran1	gain	IPR028889	O	Ubiquitin specific protease domain	7
34	Auran1	gain	IPR032454	B	Histone H2A, C-terminal domain	8
34	Auran1	gain	IPR035425	B	CENP-T/Histone H4, histone fold	6
34	Auran1	gain	IPR040626	O	Cytosolic carboxypeptidase, N-terminal	3
34	Auran1	gain	IPR041228	Z	Dynein heavy chain, C-terminal domain	10
34	Auran1	gain	IPR041658	Z	Dynein heavy chain AAA lid domain	6
34	Auran1	gain	IPR043203	T	Voltage-gated cation channel calcium and sodium	6
34	Auran1	gain	IPR044574	B	ATPase ARIP4-like	5
34	Auran1	gain	IPR045063	U	Dynamin, N-terminal	7
34	Auran1	gain	IPR045156	U	Vacuolar protein 8	6
34	Auran1	loss	IPR001356	K	Homeobox domain	3
34	Auran1	loss	IPR005114	K	Helicase-associated	6
34	Auran1	loss	IPR013584	A	RAP domain	5
34	Auran1	loss	IPR018997	O	PUB domain	5
36	Phatr	gain	IPR000209	O	Peptidase S8/S53 domain	6
36	Phatr	gain	IPR000232	K	Heat shock factor (HSF)-type, DNA-binding	12
36	Phatr	gain	IPR000772	M	Ricin B, lectin domain	8
36	Phatr	gain	IPR002035	W	von Willebrand factor, type A	6
36	Phatr	gain	IPR002073	T	3'5'-cyclic nucleotide phosphodiesterase, catalytic domain	9
36	Phatr	gain	IPR003280	P	Two pore domain potassium channel	5
36	Phatr	gain	IPR004827	K	Basic-leucine zipper domain	7
36	Phatr	gain	IPR007345	G	Polysaccharide pyruvyl transferase	3
36	Phatr	gain	IPR007527	T	Zinc finger, SWIM-type	6
36	Phatr	gain	IPR013099	P	Potassium channel domain	5
36	Phatr	gain	IPR013528	H	Hydroxymethylglutaryl-coenzyme A synthase, N-terminal	3
36	Phatr	gain	IPR018289	B	MULE transposase domain	5
36	Phatr	gain	IPR025724	B	GAG-pre-integrase domain	5
36	Phatr	gain	IPR029526	B	PiggyBac transposable element-derived protein	15
36	Phatr	gain	IPR045052	U	Copine	5
36	Phatr	loss	IPR001254	O	Serine proteases, trypsin domain	12
36	Phatr	loss	IPR003131	P	Potassium channel tetramerisation-type BTB domain	5
36	Phatr	loss	IPR003653	O	Ulp1 protease family, C-terminal catalytic domain	4
36	Phatr	loss	IPR005046	S	Protein of unknown function DUF285	6
36	Phatr	loss	IPR005114	K	Helicase-associated	15
36	Phatr	loss	IPR010869	S	Protein of unknown function DUF1501	3
36	Phatr	loss	IPR014917	S	Protein of unknown function DUF1800	3
36	Phatr	loss	IPR027806	B	Harbinger transposase-derived nuclease domain	13
36	Phatr	loss	IPR045005	K	BTB/POZ and MATH domain-containing protein 1-6	3
37		loss	IPR004273	Z	Dynein heavy chain region D6 P-loop domain	2
37		loss	IPR013517	W	FG-GAP repeat	6
37		loss	IPR041228	Z	Dynein heavy chain, C-terminal domain	2
37		loss	IPR041466	Z	Dynein heavy chain, AAA 5 extension domain	2
37		loss	IPR041589	Z	Dynein heavy chain 3, AAA+ lid domain	2
39		gain	IPR000232	K	Heat shock factor (HSF)-type, DNA-binding	38
39		gain	IPR001254	O	Serine proteases, trypsin domain	13
39		gain	IPR002455	T	GPCR family 3, GABA-B receptor	3
39		gain	IPR003582	O	ShKT domain	6
39		gain	IPR004367	D	Cyclin, C-terminal domain	6
39		gain	IPR005046	S	Protein of unknown function DUF285	9
39		gain	IPR005114	K	Helicase-associated	30
39		gain	IPR005331	W	Sulfotransferase	7
39		gain	IPR006671	D	Cyclin, N-terminal	12
39		gain	IPR008752	O	Peptidase M11, gametolysin	5
39		gain	IPR009071	K	High mobility group box domain	12
39		gain	IPR017978	T	GPCR family 3, C-terminal	4
39		gain	IPR027806	B	Harbinger transposase-derived nuclease domain	8
39		gain	IPR029526	B	PiggyBac transposable element-derived protein	6
39		gain	IPR032861	M	Xylanase inhibitor, N-terminal	3
39		gain	IPR039361	D	Cyclin	12
39		gain	IPR041664	L	Orc1-like, AAA ATPase domain	7
39		gain	IPR044831	C	Heme-binding peroxidase Ccp1-like	5
39		loss	IPR011641	T	Tyrosine-protein kinase ephrin type A/B receptor-like	4
39		loss	IPR013602	Z	Dynein heavy chain, domain-2	5
39		loss	IPR014030	I	Beta-ketoacyl synthase, N-terminal	7
39		loss	IPR014031	I	Beta-ketoacyl synthase, C-terminal	6
39		loss	IPR024743	Z	Dynein heavy chain, coiled coil stalk	5
40	Thaps	gain	IPR000232	K	Heat shock factor (HSF)-type, DNA-binding	38
40	Thaps	gain	IPR000408	B	Regulator of chromosome condensation, RCC1	6
40	Thaps	gain	IPR000683	R	Oxidoreductase, N-terminal	6
40	Thaps	gain	IPR001223	G	Glycoside hydrolase family 18, catalytic domain	6
40	Thaps	gain	IPR001283	W	Cysteine-rich secretory protein-related	11
40	Thaps	gain	IPR002156	A	Ribonuclease H domain	4
40	Thaps	gain	IPR002557	M	Chitin binding domain	9
40	Thaps	gain	IPR003018	T	GAF domain	4
40	Thaps	gain	IPR004104	R	Oxidoreductase, C-terminal	3
40	Thaps	gain	IPR004367	D	Cyclin, C-terminal domain	5
40	Thaps	gain	IPR005331	W	Sulfotransferase	8
40	Thaps	gain	IPR006671	D	Cyclin, N-terminal	10
40	Thaps	gain	IPR011761	E	ATP-grasp fold	5
40	Thaps	gain	IPR013211	S	LVIVD	2
40	Thaps	gain	IPR014044	O	CAP domain	9
40	Thaps	gain	IPR018011	W	Carbohydrate sulfotransferase 8-10	5
40	Thaps	gain	IPR026913	S	Methyltransferase-like protein 24	3
40	Thaps	gain	IPR035425	B	CENP-T/Histone H4, histone fold	3
40	Thaps	gain	IPR039361	D	Cyclin	10
40	Thaps	gain	IPR041664	L	Orc1-like, AAA ATPase domain	10
40	Thaps	gain	IPR044831	C	Heme-binding peroxidase Ccp1-like	7
40	Thaps	gain	IPR045054	O	Prolyl 4-hydroxylase	10
40	Thaps	loss	IPR000313	R	PWWP domain	2
40	Thaps	loss	IPR000620	R	EamA domain	4
40	Thaps	loss	IPR000626	O	Ubiquitin-like domain	10
40	Thaps	loss	IPR000772	M	Ricin B, lectin domain	4
40	Thaps	loss	IPR000782	W	FAS1 domain	5
40	Thaps	loss	IPR001466	R	Beta-lactamase-related	3
40	Thaps	loss	IPR001660	A	Sterile alpha motif domain	3
40	Thaps	loss	IPR002083	O	MATH/TRAF domain	5
40	Thaps	loss	IPR002455	T	GPCR family 3, GABA-B receptor	3
40	Thaps	loss	IPR002937	E	Amine oxidase	6
40	Thaps	loss	IPR003034	R	SAP domain	11
40	Thaps	loss	IPR003653	O	Ulp1 protease family, C-terminal catalytic domain	5
40	Thaps	loss	IPR004304	E	Acetamidase/Formamidase	2
40	Thaps	loss	IPR005046	S	Protein of unknown function DUF285	13
40	Thaps	loss	IPR006201	T	Neurotransmitter-gated ion-channel	2
40	Thaps	loss	IPR006311	U	Twin-arginine translocation pathway, signal sequence	5
40	Thaps	loss	IPR007527	T	Zinc finger, SWIM-type	6
40	Thaps	loss	IPR008752	O	Peptidase M11, gametolysin	4
40	Thaps	loss	IPR010285	L	DNA helicase Pif1-like	2
40	Thaps	loss	IPR013099	P	Potassium channel domain	4
40	Thaps	loss	IPR013517	W	FG-GAP repeat	6
40	Thaps	loss	IPR017978	T	GPCR family 3, C-terminal	3
40	Thaps	loss	IPR018289	B	MULE transposase domain	2
40	Thaps	loss	IPR025197	O	Domain of unknown function DUF4116	2
40	Thaps	loss	IPR027370	R	RING-type zinc-finger, LisH dimerisation motif	5
40	Thaps	loss	IPR027806	B	Harbinger transposase-derived nuclease domain	8
40	Thaps	loss	IPR039448	R	Right handed beta helix domain	3
40	Thaps	loss	IPR045005	K	BTB/POZ and MATH domain-containing protein 1-6	3
41		gain	IPR000001	T	Kringle	2
41		gain	IPR001223	G	Glycoside hydrolase family 18, catalytic domain	9
41		gain	IPR001254	O	Serine proteases, trypsin domain	7
41		gain	IPR001283	W	Cysteine-rich secretory protein-related	8
41		gain	IPR002083	O	MATH/TRAF domain	3
41		gain	IPR002350	O	Kazal domain	2
41		gain	IPR002557	M	Chitin binding domain	13
41		gain	IPR003034	R	SAP domain	8
41		gain	IPR003131	P	Potassium channel tetramerisation-type BTB domain	4
41		gain	IPR003961	W	Fibronectin type III	4
41		gain	IPR004302	M	Cellulose/chitin-binding protein, N-terminal	2
41		gain	IPR005114	K	Helicase-associated	17
41		gain	IPR006598	O	Glycosyl transferase CAP10 domain	5
41		gain	IPR006671	D	Cyclin, N-terminal	13
41		gain	IPR006813	G	Glycosyl transferase, family 17	3
41		gain	IPR007125	B	Histone H2A/H2B/H3	6
41		gain	IPR007577	G	Glycosyltransferase, DXD sugar-binding motif	5
41		gain	IPR008422	K	Homeobox KN domain	4
41		gain	IPR010869	S	Protein of unknown function DUF1501	4
41		gain	IPR013517	W	FG-GAP repeat	14
41		gain	IPR013519	W	Integrin alpha beta-propellor	7
41		gain	IPR014044	O	CAP domain	7
41		gain	IPR014917	S	Protein of unknown function DUF1800	5
41		gain	IPR039361	D	Cyclin	15
41		gain	IPR041664	L	Orc1-like, AAA ATPase domain	14
41		gain	IPR044831	C	Heme-binding peroxidase Ccp1-like	8
41		gain	IPR045005	K	BTB/POZ and MATH domain-containing protein 1-6	3
41		loss	IPR001764	G	Glycoside hydrolase, family 3, N-terminal	3
41		loss	IPR002772	G	Glycoside hydrolase family 3 C-terminal domain	3
41		loss	IPR003661	T	Signal transduction histidine kinase, dimerisation/phosphoacceptor domain	3
42	Thaoc	gain	IPR000164	B	Histone H3/CENP-A	4
42	Thaoc	gain	IPR000421	T	Coagulation factor 5/8 C-terminal domain	4
42	Thaoc	gain	IPR000626	O	Ubiquitin-like domain	15
42	Thaoc	gain	IPR000772	M	Ricin B, lectin domain	11
42	Thaoc	gain	IPR001002	M	Chitin-binding, type 1	3
42	Thaoc	gain	IPR001254	O	Serine proteases, trypsin domain	11
42	Thaoc	gain	IPR001466	R	Beta-lactamase-related	6
42	Thaoc	gain	IPR001660	A	Sterile alpha motif domain	7
42	Thaoc	gain	IPR001810	O	F-box domain	5
42	Thaoc	gain	IPR001910	F	Inosine/uridine-preferring nucleoside hydrolase domain	3
42	Thaoc	gain	IPR002068	O	Alpha crystallin/Hsp20 domain	5
42	Thaoc	gain	IPR002083	O	MATH/TRAF domain	29
42	Thaoc	gain	IPR002213	G	UDP-glucuronosyl/UDP-glucosyltransferase	2
42	Thaoc	gain	IPR002350	O	Kazal domain	5
42	Thaoc	gain	IPR002495	G	Glycosyl transferase, family 8	3
42	Thaoc	gain	IPR002925	Q	Dienelactone hydrolase	3
42	Thaoc	gain	IPR002937	E	Amine oxidase	7
42	Thaoc	gain	IPR003034	R	SAP domain	30
42	Thaoc	gain	IPR003131	P	Potassium channel tetramerisation-type BTB domain	11
42	Thaoc	gain	IPR003323	O	OTU domain	4
42	Thaoc	gain	IPR003582	O	ShKT domain	6
42	Thaoc	gain	IPR003653	O	Ulp1 protease family, C-terminal catalytic domain	10
42	Thaoc	gain	IPR004302	M	Cellulose/chitin-binding protein, N-terminal	9
42	Thaoc	gain	IPR005046	S	Protein of unknown function DUF285	24
42	Thaoc	gain	IPR005114	K	Helicase-associated	28
42	Thaoc	gain	IPR005818	B	Linker histone H1/H5, domain H15	11
42	Thaoc	gain	IPR006094	C	FAD linked oxidase, N-terminal	5
42	Thaoc	gain	IPR006104	G	Glycosyl hydrolases family 2, sugar binding domain	2
42	Thaoc	gain	IPR006461	T	PLAC8 motif-containing protein	4
42	Thaoc	gain	IPR007065	S	HPP	6
42	Thaoc	gain	IPR007125	B	Histone H2A/H2B/H3	7
42	Thaoc	gain	IPR007527	T	Zinc finger, SWIM-type	7
42	Thaoc	gain	IPR008160	W	Collagen triple helix repeat	3
42	Thaoc	gain	IPR009056	C	Cytochrome c-like domain	4
42	Thaoc	gain	IPR010285	L	DNA helicase Pif1-like	14
42	Thaoc	gain	IPR011706	C	Multicopper oxidase, type 2	4
42	Thaoc	gain	IPR011707	C	Multicopper oxidase, type 3	3
42	Thaoc	gain	IPR013121	C	Ferric reductase, NAD binding domain	3
42	Thaoc	gain	IPR013517	W	FG-GAP repeat	46
42	Thaoc	gain	IPR013584	A	RAP domain	11
42	Thaoc	gain	IPR013830	I	SGNH hydrolase-type esterase domain	7
42	Thaoc	gain	IPR014016	L	UvrD-like helicase, ATP-binding domain	6
42	Thaoc	gain	IPR014017	L	UvrD-like DNA helicase, C-terminal	3
42	Thaoc	gain	IPR014917	S	Protein of unknown function DUF1800	6
42	Thaoc	gain	IPR016166	C	FAD-binding domain, PCMH-type	6
42	Thaoc	gain	IPR017941	C	Rieske [2Fe-2S] iron-sulphur domain	4
42	Thaoc	gain	IPR018289	B	MULE transposase domain	4
42	Thaoc	gain	IPR021838	S	Protein of unknown function DUF3431	3
42	Thaoc	gain	IPR025476	B	Helitron helicase-like domain	4
42	Thaoc	gain	IPR026057	I	PC-Esterase	3
42	Thaoc	gain	IPR027370	R	RING-type zinc-finger, LisH dimerisation motif	22
42	Thaoc	gain	IPR027806	B	Harbinger transposase-derived nuclease domain	7
42	Thaoc	gain	IPR032808	S	DoxX family	2
42	Thaoc	gain	IPR037524	M	PA14/GLEYA domain	3
42	Thaoc	gain	IPR039904	S	TPR and ankyrin repeat-containing protein 1	7
42	Thaoc	gain	IPR044053	Q	Hydroxylase/desaturase AsaB-like	2
42	Thaoc	gain	IPR044772	P	Nitrate transporter	4
42	Thaoc	gain	IPR045005	K	BTB/POZ and MATH domain-containing protein 1-6	21
42	Thaoc	gain	IPR045087	C	Multicopper oxidase	2
42	Thaoc	loss	IPR000232	K	Heat shock factor (HSF)-type, DNA-binding	20
42	Thaoc	loss	IPR000408	B	Regulator of chromosome condensation, RCC1	5
42	Thaoc	loss	IPR000683	R	Oxidoreductase, N-terminal	4
42	Thaoc	loss	IPR000717	O	Proteasome component (PCI) domain	4
42	Thaoc	loss	IPR000863	P	Sulfotransferase domain	4
42	Thaoc	loss	IPR004014	P	Cation-transporting P-type ATPase, N-terminal	3
42	Thaoc	loss	IPR004104	R	Oxidoreductase, C-terminal	3
42	Thaoc	loss	IPR006652	R	Kelch repeat type 1	3
42	Thaoc	loss	IPR007627	K	RNA polymerase sigma-70 region 2	3
42	Thaoc	loss	IPR008630	G	Glycosyltransferase 34	2
42	Thaoc	loss	IPR011761	E	ATP-grasp fold	7
42	Thaoc	loss	IPR015655	O	Protein phosphatase 2C family	4
42	Thaoc	loss	IPR016158	O	Cullin homology domain	3
42	Thaoc	loss	IPR023561	G	Carbonic anhydrase, alpha-class	2
42	Thaoc	loss	IPR024977	D	Anaphase-promoting complex subunit 4, WD40 domain	3
42	Thaoc	loss	IPR025733	R	Iron/zinc purple acid phosphatase-like C-terminal domain	2
42	Thaoc	loss	IPR031468	U	Synaptotagmin-like mitochondrial-lipid-binding domain	2
42	Thaoc	loss	IPR045054	O	Prolyl 4-hydroxylase	6
42	Thaoc	loss	IPR045055	A	DNA2/NAM7-like helicase	4
43		gain	IPR000232	K	Heat shock factor (HSF)-type, DNA-binding	9
43		gain	IPR005114	K	Helicase-associated	6
43		loss	IPR002044	G	Carbohydrate binding module family 20	7
43		loss	IPR011641	T	Tyrosine-protein kinase ephrin type A/B receptor-like	6
43		loss	IPR023780	B	Chromo domain	8
44	Nanoce1779	gain	IPR001547	G	Glycoside hydrolase, family 5	9
44	Nanoce1779	gain	IPR002885	A	Pentatricopeptide repeat	24
44	Nanoce1779	gain	IPR013525	R	ABC-2 type transporter	22
44	Nanoce1779	gain	IPR013767	T	PAS fold	6
44	Nanoce1779	gain	IPR033443	A	Pentacotripeptide-repeat region of PRORP	12
44	Nanoce1779	gain	IPR043926	R	ABC transporter family G domain	13
44	Nanoce1779	loss	IPR001660	A	Sterile alpha motif domain	6
44	Nanoce1779	loss	IPR002073	T	3'5'-cyclic nucleotide phosphodiesterase, catalytic domain	7
44	Nanoce1779	loss	IPR003131	P	Potassium channel tetramerisation-type BTB domain	5
44	Nanoce1779	loss	IPR003582	O	ShKT domain	5
44	Nanoce1779	loss	IPR005114	K	Helicase-associated	10
44	Nanoce1779	loss	IPR005331	W	Sulfotransferase	8
44	Nanoce1779	loss	IPR045054	O	Prolyl 4-hydroxylase	10
46	Cvel	gain	IPR000387	O	Tyrosine-specific protein phosphatases domain	13
46	Cvel	gain	IPR000408	B	Regulator of chromosome condensation, RCC1	47
46	Cvel	gain	IPR000436	R	Sushi/SCR/CCP domain	54
46	Cvel	gain	IPR000668	O	Peptidase C1A, papain C-terminal	13
46	Cvel	gain	IPR000884	T	Thrombospondin type-1 (TSP1) repeat	16
46	Cvel	gain	IPR001283	W	Cysteine-rich secretory protein-related	7
46	Cvel	gain	IPR001293	T	Zinc finger, TRAF-type	48
46	Cvel	gain	IPR001300	T	Peptidase C2, calpain, catalytic domain	31
46	Cvel	gain	IPR001425	C	Archaeal/bacterial/fungal rhodopsins	16
46	Cvel	gain	IPR001765	G	Carbonic anhydrase	6
46	Cvel	gain	IPR001767	T	Hedgehog protein, Hint domain	14
46	Cvel	gain	IPR002035	W	von Willebrand factor, type A	19
46	Cvel	gain	IPR002044	G	Carbohydrate binding module family 20	28
46	Cvel	gain	IPR002073	T	3'5'-cyclic nucleotide phosphodiesterase, catalytic domain	24
46	Cvel	gain	IPR002182	T	NB-ARC	6
46	Cvel	gain	IPR002213	G	UDP-glucuronosyl/UDP-glucosyltransferase	9
46	Cvel	gain	IPR002350	O	Kazal domain	8
46	Cvel	gain	IPR002455	T	GPCR family 3, GABA-B receptor	5
46	Cvel	gain	IPR002656	O	Acyltransferase 3 domain	8
46	Cvel	gain	IPR002885	A	Pentatricopeptide repeat	37
46	Cvel	gain	IPR002889	G	Carbohydrate-binding WSC	11
46	Cvel	gain	IPR002921	I	Fungal lipase-like domain	17
46	Cvel	gain	IPR003410	W	HYR domain	40
46	Cvel	gain	IPR003661	T	Signal transduction histidine kinase, dimerisation/phosphoacceptor domain	7
46	Cvel	gain	IPR003819	P	TauD/TfdA-like domain	19
[truncated: 120 more rows]

## Sheet: Interproscan Annotations
Supplementary Table S8, continued. Pfam counts and descriptions across datasets.
	\Tree label	Phaeoant	Phaeocor	Phaeosis	Phaeoglo	Aureanop	Chlovari	Chlarein	Chryparv	Coccsube	Chroveli	Gephhuxl	Galdsulp	Gracchor	Guilthet	Micrpusl	Nannocea	Ostrluci	Pavl2436	Pela2097	Phaetric	Porppurp	Thalocea	Thalpseu	Vitrbras
Description	Family ID	Phaant1	Phacord1	PSC	Phaglo1	Auran1	Chlorella	Chlre4	Chrpa1	Coccomyxa	Cvel	Emihu1	Galsu	Grach	Guith1	MicpuC3	Nanoce1779	Oluci	Pavlov2436	PelagoCCMP2097	Phatr	Porpu2	Thaoc	Thaps	Vbra
Protein kinase domain Protein kinase domain	IPR000719	442	564	479	364	316	243	539	544	198	454	559	89	188	545	147	167	122	247	155	159	225	168	177	475
EF-hand domain pair EF-hand calcium-binding domain	IPR002048	525	707	507	423	230	49	101	996	44	186	253	17	32	357	109	36	40	142	156	74	65	95	75	196
Ankyrin repeat Ankyrin repeat	IPR002110	381	549	418	328	162	89	95	465	26	619	303	13	19	404	80	71	51	129	135	46	56	114	45	151
Ankyrin repeats (3 copies)	IPR020683	321	475	337	274	116	91	68	398	21	501	257	12	18	340	71	60	43	96	108	50	52	46	47	179
Trp-Asp (WD) repeats WD domain, G-beta repeat	IPR001680	163	211	327	159	153	118	148	247	111	145	163	119	129	286	147	107	107	116	125	90	114	56	87	146
Ring finger domain Zinc finger RING-type	IPR001841	258	261	185	204	79	73	81	194	59	202	361	88	76	147	88	63	53	93	93	82	70	370	64	324
Superfamilies 1 and 2 helicase ATP-binding type-1 domain	IPR014001	143	166	175	108	111	84	75	167	91	123	190	60	86	129	107	90	99	89	92	89	95	76	94	113
Superfamilies 1 and 2 helicase C-terminal domain Helicase conserved C-terminal domain	IPR001650	155	163	161	89	110	84	81	166	95	124	181	62	91	119	108	92	100	91	94	87	96	84	93	114
Eukaryotic RNA Recognition Motif (RRM) RNA recognition motif (aka RRM, RBD, or RNP domain)	IPR000504	95	134	127	111	69	93	91	101	87	181	115	73	54	139	93	82	67	76	104	60	49	54	62	130
dnaJ domain DnaJ domain	IPR001623	137	166	154	129	100	44	59	152	44	73	180	32	26	84	74	34	52	71	67	53	36	88	60	98
TPR repeat Tetratricopeptide repeat	IPR019734	176	173	151	129	76	49	55	158	45	78	80	27	38	214	62	45	54	60	52	64	36	56	54	78
ABC transporter ATP-binding cassette, ABC transporter-type domain	IPR003439	114	99	109	85	124	63	68	78	58	85	145	48	43	86	53	77	47	65	64	58	45	63	58	49
DEAD/DEAH box helicase	IPR011545	109	99	97	75	64	54	55	110	62	81	116	43	60	77	72	58	70	65	64	61	66	59	65	73
ATPase family associated with various cellular activities (AAA) AAA domain, putative AbiEii toxin, Type IV TA system AAA domain (Cdc48 subfamily)	IPR003959	76	90	84	67	75	55	62	81	54	70	108	46	43	65	59	52	55	56	51	53	51	58	65	69
Fe(2+) 2-oxoglutarate dioxygenase domain	IPR005123	171	210	133	110	63	27	24	156	23	41	150	3	7	27	45	19	25	40	58	43	15	42	54	34
Solute carrier (Solcar) repeat Mitochondrial carrier protein	IPR018108	101	105	92	75	59	33	44	81	41	49	139	38	37	87	43	52	43	62	45	61	40	51	55	50
Thioredoxin domain Thioredoxin	IPR013766	113	110	94	84	51	45	54	86	43	67	80	26	42	82	48	39	38	48	31	49	31	28	53	67
PDZ domain PDZ domain	IPR001478	100	187	109	116	30	15	14	180	11	7	79	7	12	307	13	13	11	20	30	36	18	34	35	13
Sel1 repeat	IPR006597	59	19	13	31	117	2	2	65	2	6	17	3	32	32	77	5	2	74	38	5	42	741	5	5
Major Facilitator Superfamily	IPR011701	102	126	100	68	39	25	34	91	51	61	114	25	27	41	22	40	27	48	36	46	29	46	46	84
SET domain SET domain	IPR001214	90	126	94	80	26	26	48	113	34	61	76	10	16	69	51	22	30	39	37	52	15	57	56	56
Ion transport protein	IPR005821	110	181	150	83	69	10	35	162	3	62	39	0	3	153	20	11	14	22	21	13	13	13	18	85
Major facilitator superfamily (MFS)	IPR020846	86	91	100	62	42	33	37	70	63	52	108	83	20	44	30	40	30	42	30	35	22	31	35	71
Cyclic nucleotide-binding domain cAMP/cGMP binding motif	IPR000595	108	149	158	66	102	9	25	113	15	36	42	2	5	113	33	11	11	34	38	18	10	44	26	40
Myb-type HTH DNA-binding domain Myb-like DNA-binding domain	IPR017930	97	86	80	85	46	27	36	76	24	16	110	41	38	96	33	33	28	37	25	27	74	30	26	32
Myb-like domain	IPR001005	105	97	86	93	48	20	32	77	23	19	121	36	31	40	31	33	27	38	25	28	63	38	30	37
Chlorophyll A-B binding protein	IPR022796	126	74	51	82	63	24	36	66	37	56	90	9	9	24	30	26	26	35	43	42	10	60	43	31
short chain dehydrogenase	IPR002347	85	71	71	54	40	31	26	55	44	63	101	18	23	40	32	47	22	47	33	40	24	46	34	46
Kinesin motor domain Kinesin motor domain	IPR001752	56	113	103	64	65	27	35	102	24	70	59	13	9	66	32	18	15	72	43	16	6	19	26	48
Zinc finger MYND-type MYND finger Zinc finger MYND-type	IPR002893	60	24	21	15	55	52	78	22	20	113	38	3	7	9	42	13	4	61	42	8	4	353	6	40
WW/rsp5/WWP domain WW domain	IPR001202	106	159	92	104	38	6	17	120	10	25	79	3	6	70	20	8	10	27	45	22	3	26	21	21
2OG-Fe(II) oxygenase superfamily	IPR044862	106	140	96	72	45	19	19	105	9	14	112	1	1	27	23	10	16	29	32	30	7	32	40	23
CHLOROPHYLL A/B BINDING PROTEIN	IPR001344	122	69	47	80	61	19	25	63	24	51	82	8	7	21	19	25	16	26	40	41	7	50	44	28
GNAT acetyltransferase 2 Gcn5-related N-acetyltransferase (GNAT) domain Acetyltransferase (GNAT) family Acetyltransferase (GNAT) domain	IPR000182	65	71	60	60	27	36	35	69	28	42	83	25	29	43	37	29	28	33	26	38	28	27	30	37
Ubiquitin-like domain Ubiquitin family Ubiquitin domain	IPR000626	72	78	41	67	32	27	39	42	29	69	63	29	20	56	29	28	15	48	26	21	25	42	17	80
JmjC domain, hydroxylase Cupin superfamily protein JmjC domain	IPR003347	65	112	118	73	57	21	13	91	23	30	73	5	10	39	31	18	26	26	35	24	13	21	19	18
PH domain PH domain	IPR001849	55	116	174	63	43	9	6	82	7	29	52	3	18	126	10	24	5	18	44	19	18	12	13	25
C2 domain C2 domain	IPR000008	66	106	83	56	33	17	30	74	13	39	43	5	28	144	19	17	11	19	35	25	27	14	12	44
Calcineurin-like phosphoesterase	IPR004843	48	69	58	45	46	45	28	68	32	50	69	20	21	43	26	27	23	26	28	32	24	26	32	31
FKBP-type peptidyl-prolyl cis-trans isomerase domain FKBP-type peptidyl-prolyl cis-trans isomerase	IPR001179	93	80	63	73	54	15	23	77	14	19	69	10	20	46	30	15	23	32	22	28	18	28	25	16
Protein tyrosine and serine/threonine kinase	IPR001245	41	43	35	36	16	69	160	63	43	16	115	7	10	112	16	9	10	23	10	16	12	11	12	24
Cyclophilin type peptidyl-prolyl cis-trans isomerase/CLD Cyclophilin-type peptidyl-prolyl cis-trans isomerase domain	IPR002130	71	69	51	55	47	20	26	51	21	27	72	17	16	28	31	24	25	36	32	30	11	40	34	34
U-box domain U-box domain	IPR003613	98	84	60	65	28	27	26	97	22	12	209	4	2	55	13	11	7	11	13	7	2	7	10	29
PPM-type phosphatase domain Protein phosphatase 2C	IPR001932	68	68	63	47	36	29	32	63	24	38	57	9	15	53	18	22	16	34	21	24	18	18	24	44
alpha/beta hydrolase fold Alpha/beta hydrolase family	IPR000073	55	54	46	42	26	31	30	41	32	41	66	16	27	33	28	35	20	28	23	28	26	29	32	38
SNF2 family N-terminal domain	IPR000330	34	67	71	30	39	28	20	57	27	28	81	12	23	44	28	26	24	31	27	23	19	22	26	28
Regulator of chromosome condensation (RCC1) repeat Regulator of chromosome condensation (RCC1) repeat	IPR000408	45	65	81	31	30	17	15	68	12	98	70	10	8	79	17	12	13	22	23	12	7	11	22	40
Integrase catalytic domain	IPR001584	1	1	0	9	2	1	0	9	0	297	2	0	4	2	0	0	0	0	0	62	318	39	1	34
HEPATOCELLULAR CARCINOMA-ASSOCIATED ANTIGEN Lysine methyltransferase	IPR019410	64	85	72	57	16	13	9	61	7	25	67	8	2	48	28	21	17	22	29	28	9	24	19	20
Armadillo/plakoglobin ARM repeat Armadillo/beta-catenin-like repeat	IPR000225	49	74	46	43	40	25	12	172	11	13	27	5	12	55	10	7	3	62	12	14	4	6	10	43
BTB domain BTB/POZ domain	IPR000210	67	78	32	47	6	6	41	40	13	38	162	8	10	14	3	8	2	15	7	13	6	72	16	31
EGF-like domain	IPR000742	41	83	76	36	31	10	31	37	9	217	16	2	0	49	8	5	9	5	13	6	1	13	10	32
Histidine phosphatase superfamily (branch 1)	IPR013078	57	77	47	49	36	12	18	46	13	27	56	6	9	31	12	18	14	33	30	26	12	25	28	23
Methyltransferase FkbM domain	IPR006342	128	104	81	85	12	7	8	84	5	10	64	3	13	21	8	6	5	19	6	15	8	14	11	6
Glutathione S-transferase, N-terminal domain Soluble glutathione S-transferase N-terminal domain	IPR004045	51	58	33	39	41	19	18	30	22	43	63	19	14	30	25	17	16	28	22	24	23	24	18	35
Methyltransferase domain	IPR013216	50	57	57	44	34	18	22	39	14	33	60	16	18	19	20	19	19	28	20	24	15	28	20	29
Aldo/keto reductase family	IPR023210	64	69	38	46	56	18	18	46	19	20	64	14	8	23	16	17	10	28	21	24	10	24	28	18
Pentatricopeptide repeat domain Pentatricopeptide (PPR) repeat PPR repeat PPR repeat family	IPR002885	35	53	48	23	5	24	9	38	19	76	51	16	18	35	16	50	19	12	6	36	24	22	28	25
Leucine rich repeat	IPR001611	28	52	51	30	29	19	26	52	14	18	36	6	6	114	22	2	11	26	14	22	7	15	26	35
50S ribosome-binding GTPase	IPR006073	38	44	42	23	23	21	24	31	20	34	33	24	21	31	27	23	26	19	23	28	32	22	24	31
ABC transporter transmembrane region ABC transporter transmembrane region 2 ABC transporter integral membrane type-1 fused domain	IPR011527	47	44	48	33	33	24	21	37	18	30	57	16	21	33	14	27	9	21	22	18	17	25	24	25
Triose-phosphate Transporter family	IPR004853	72	69	54	58	19	21	26	46	16	20	56	13	20	21	17	11	15	25	12	12	19	14	19	17
Ubiquitin-conjugating enzyme Ubiquitin-conjugating (UBC) core domain	IPR000608	46	41	34	30	24	23	22	37	25	47	52	19	23	31	19	17	15	20	17	18	21	20	19	31
Nucleotide-diphospho-sugar transferase	IPR005069	73	133	74	71	9	26	24	67	11	2	54	2	10	10	8	2	14	20	10	8	8	15	6	5
SAP domain SAP motif	IPR003034	37	57	42	64	13	12	10	64	11	10	57	5	4	29	29	17	11	16	24	22	6	65	24	12
Chromo and chromo shadow domain	IPR000953	48	59	56	51	0	6	9	52	4	114	77	3	13	10	5	6	4	59	3	3	35	2	4	38
PHD-finger Zinc finger PHD-type	IPR019787	28	59	55	39	13	29	29	42	21	17	47	8	7	25	30	20	19	21	14	19	17	15	23	43
Exostosin family	IPR040911	89	118	85	83	13	17	36	61	15	8	53	1	3	1	1	0	3	18	7	4	8	8	1	17
F-box-like F-box domain F-box domain	IPR001810	40	60	55	33	7	46	27	30	12	14	70	17	22	12	25	7	8	32	2	13	24	18	11	27
AAA+ lid domain	IPR041569	35	34	30	24	27	22	22	28	23	24	35	20	20	29	25	25	24	21	16	20	22	20	24	28
NAD(P)H-binding GDP-mannose 4,6 dehydratase	IPR016040	50	31	32	33	13	20	18	29	19	27	39	13	26	25	21	20	23	23	15	29	15	29	24	17
PROLYL 4-HYDROXYLASE ALPHA SUBUNIT	IPR045054	60	69	53	41	24	12	19	53	6	11	67	0	2	14	13	6	11	16	18	25	3	21	37	8
Phytanoyl-CoA dioxygenase (PhyH)	IPR008775	55	87	60	50	43	3	3	58	5	26	52	3	4	16	18	6	12	20	20	15	6	10	13	8
CRAL/TRIO domain Divergent CRAL/TRIO domain CRAL-TRIO lipid binding domain	IPR001251	54	57	52	37	19	12	19	41	13	13	56	6	8	27	9	22	13	24	15	27	13	22	19	12
Nudix hydrolase domain NUDIX domain	IPR000086	37	48	29	34	17	19	24	34	15	21	48	15	17	28	14	27	18	24	11	22	21	20	22	20
Cupin-like domain	IPR041667	45	79	80	44	23	10	5	58	11	12	49	2	4	24	22	10	18	19	21	12	6	10	9	12
Ras family small GTPase Ras family	IPR001806	42	34	36	32	36	13	16	33	14	37	30	12	14	26	14	20	13	27	24	19	12	18	24	32
AMP-binding enzyme	IPR000873	34	40	36	13	47	20	12	27	16	38	55	15	12	22	15	23	12	12	17	17	16	18	17	40
Sulfatase	IPR000917	55	101	93	63	62	1	19	25	0	4	88	0	0	0	0	8	0	9	20	4	0	12	3	5
Pyridine nucleotide-disulphide oxidoreductase	IPR023753	25	33	39	27	24	19	19	30	18	32	28	16	15	28	15	26	14	16	16	22	22	24	24	32
ABC1 family	IPR004147	31	39	38	25	43	13	16	36	17	20	40	9	12	22	20	19	20	17	25	23	15	19	20	17
EXOSTOSIN HEPARAN SULFATE GLYCOSYLTRANSFERASE -RELATED	IPR004263	78	95	73	66	6	21	39	57	11	6	47	2	2	1	2	2	5	10	6	6	7	8	4	18
Reverse transcriptase (RT) catalytic domain	IPR000477	3	0	2	5	0	14	9	11	2	268	5	2	8	16	1	1	1	1	0	2	158	30	1	28
KINESIN-RELATED	IPR027640	29	59	48	33	31	9	19	63	8	37	35	2	1	35	15	8	8	42	27	6	0	6	12	28
Transmembrane amino acid transporter protein	IPR013057	28	40	40	24	20	37	8	36	21	31	71	21	2	17	7	15	6	13	10	22	6	23	19	17
Tyrosine specific protein phosphatases domain	IPR000387	37	42	42	23	18	14	21	41	17	41	37	6	7	70	12	10	9	18	15	7	13	11	12	26
Ubiquitin carboxyl-terminal hydrolase	IPR001394	24	35	38	21	22	19	16	24	17	32	35	18	15	32	13	17	11	14	9	20	11	22	19	51
ShK domain-like ShKT domain	IPR003582	77	85	64	79	4	13	10	60	5	3	74	0	0	2	2	0	4	16	1	10	0	19	11	1
Ubiquitin specific protease (USP) domain	IPR028889	24	34	38	22	24	19	16	24	17	31	33	18	17	31	14	18	11	12	10	20	12	18	18	50
Elongation factor Tu GTP binding domain Translational (tr)-type guanine nucleotide-binding (G) domain	IPR000795	20	21	25	15	22	20	21	21	21	31	28	21	20	27	21	21	22	20	19	23	20	20	23	23
Reverse transcriptase (RNA-dependent DNA polymerase)	IPR013103	3	1	0	2	0	0	1	14	0	173	0	0	8	0	1	0	2	0	0	93	168	52	0	25
Sugar (and other) transporter	IPR005828	38	37	38	29	22	18	12	19	23	28	41	68	3	18	12	14	10	19	9	16	5	14	12	23
Forkhead-associated (FHA) domain FHA domain	IPR000253	30	52	39	38	12	15	12	48	13	25	69	7	5	40	15	13	10	23	15	10	4	4	7	27
Bestrophin, RFP-TM, chloride channel	IPR021134	67	67	46	49	8	18	9	34	5	14	52	1	7	13	11	6	6	27	11	18	9	18	12	12
Myosin motor domain Myosin head (motor domain)	IPR001609	34	82	100	49	40	4	4	37	3	10	48	1	0	12	2	7	1	40	12	10	0	10	11	5
Rhodanese-like domain Rhodanese domain	IPR001763	23	38	32	29	16	27	25	21	19	16	26	10	10	21	30	15	21	20	19	22	14	17	17	25
Protein of unknown function (DUF563) GLYCOSYLTRANSFERASE	IPR007657	48	67	50	50	16	24	11	38	8	25	29	7	16	21	3	5	3	14	14	10	23	14	16	7
Aminotransferase class I and II	IPR004839	30	29	23	20	29	14	17	24	20	19	39	19	18	22	14	19	13	17	15	18	20	16	20	22
Chromo (CHRromatin Organisation MOdifier) domain	IPR023780	38	51	48	43	0	1	3	41	3	92	59	3	9	6	4	5	5	45	2	3	15	2	3	31
Cytochrome b5 family, heme-binding domain Cytochrome b5-like Heme/Steroid binding domain	IPR001199	30	35	26	22	28	6	14	31	11	25	37	8	13	20	23	15	21	23	15	19	15	18	23	16
Histidine kinase-, DNA gyrase B-, and HSP90-like ATPase	IPR003594	27	23	19	18	13	8	13	13	10	130	15	6	7	26	12	8	7	39	18	22	9	14	10	22
RNA pseudouridylate synthase	IPR006145	30	36	30	32	14	7	8	27	6	27	29	6	9	22	19	15	17	16	19	22	12	24	22	27
Soluble glutathione S-transferase C-terminal domain	IPR010987	33	46	21	20	29	11	18	23	14	30	39	16	6	22	15	9	10	17	14	19	15	15	14	28
PEROXISOMAL MEMBRANE PROTEIN 2, PXMP2 MPV17 Mpv17 / PMP22 family	IPR007248	45	50	35	30	20	8	11	28	11	8	61	10	6	18	9	13	5	15	19	18	8	14	16	17
PROTEIN PHOSPHATASE 2C	IPR015655	46	42	43	31	18	14	15	33	10	23	25	6	9	29	7	12	9	20	16	18	13	8	15	18
Endonuclease/Exonuclease/phosphatase family	IPR005135	28	43	44	21	12	11	18	35	9	27	41	12	19	24	13	15	13	16	17	9	14	12	9	18
AP2/ERF domain AP2 domain	IPR001471	17	16	26	8	10	20	15	19	19	36	130	0	0	9	18	6	10	13	5	3	0	6	13	88
Zinc finger PHD-type	IPR019786	18	45	40	31	11	22	19	33	18	10	29	8	5	19	17	15	14	21	13	15	11	11	18	33
Cyclin, N-terminal domain Cyclins	IPR006671	33	27	22	27	13	7	15	14	8	9	24	10	12	18	8	17	8	21	9	26	11	43	53	27
Response regulatory domain Response regulator receiver domain	IPR001789	26	27	35	23	8	8	14	14	8	128	19	2	0	16	14	4	10	33	31	17	0	8	9	12
Core histone H2A/H2B/H3/H4	IPR007125	26	13	6	24	37	28	91	13	28	11	37	9	7	16	12	8	9	12	2	12	9	28	19	17
HMG boxes A and B DNA-binding domains HMG-box domain HMG (high mobility group) box	IPR009071	39	32	25	33	15	6	8	35	9	10	32	1	1	30	13	11	8	22	10	37	0	31	28	19
Sulfotransferase family	IPR005331	76	76	55	72	10	11	2	10	0	0	23	0	13	6	2	1	7	11	13	21	19	16	27	0
CS domain CS domain	IPR007052	43	47	40	38	22	6	9	45	8	17	33	4	4	21	17	9	11	20	20	12	3	12	8	18
Lipase (class 3)	IPR002921	27	12	14	20	7	29	20	23	30	41	32	3	9	20	11	24	8	4	9	18	27	21	19	18
Aminoacyl-transfer RNA synthetases class-II family	IPR006195	22	19	24	14	17	15	15	19	16	25	22	18	18	33	17	16	18	11	16	21	19	15	20	19
Flavin containing amine oxidoreductase	IPR002937	19	30	26	17	18	20	13	26	15	20	32	11	17	15	15	7	12	16	10	22	14	27	14	29
KH domain	IPR004088	33	36	20	24	14	11	12	20	11	45	23	9	8	26	33	16	20	13	10	11	6	9	11	30
Dual specificity phosphatase, catalytic domain	IPR000340	26	34	30	19	19	13	14	33	14	36	29	3	5	58	11	10	9	14	15	6	9	11	10	25
Methyltransferase domain	IPR025714	29	49	37	25	7	7	7	29	11	20	30	4	12	21	13	14	10	15	9	19	12	16	22	17
PDZ domain	IPR041489	26	59	33	27	7	5	5	33	6	3	26	6	5	137	3	7	4	3	7	10	5	9	10	9
UBA/TS-N domain Ubiquitin-associated domain (UBA)	IPR015940	21	44	21	18	6	9	14	60	11	19	32	12	11	27	19	11	12	13	13	12	8	12	7	27
Radical SAM core domain Radical SAM superfamily	IPR007197	20	22	19	12	20	18	19	23	16	23	24	11	14	17	19	16	20	15	14	16	19	13	20	18
Proteasome subunit	IPR001353	14	15	12	15	22	14	16	14	16	15	17	16	14	16	15	26	15	16	17	27	16	24	25	16
Bromodomain Bromodomain	IPR001487	19	18	22	16	16	12	11	17	12	15	19	11	19	28	11	22	12	16	17	25	15	23	18	16
IPT/TIG domain	IPR002909	16	55	104	35	3	1	3	59	1	3	5	1	15	68	13	2	14	6	3	0	1	2	4	16
von Willebrand factor type A domain VWFA domain	IPR002035	22	31	34	39	6	11	11	26	5	47	19	8	45	18	7	3	5	2	3	18	9	16	9	27
LSM domain	IPR001163	16	17	11	14	18	17	17	17	15	13	20	21	18	16	18	18	19	14	11	19	21	16	18	16
DHHC palmitoyltransferase	IPR001594	33	35	35	29	16	5	11	33	8	24	31	3	3	16	11	9	10	13	14	12	10	6	8	21
Adenylate and Guanylate cyclase catalytic domain Guanylate cyclase domain	IPR001054	7	12	29	7	6	5	109	16	3	15	14	0	0	72	4	3	2	7	3	29	0	19	23	12
Kelch motif	IPR006652	61	61	26	42	9	7	8	27	7	17	27	1	7	30	7	6	4	5	12	3	4	2	7	21
BspA type Leucine rich repeat region (6 copies)	IPR026906	28	34	1	20	0	0	0	68	0	0	117	0	0	5	0	0	0	0	0	0	0	126	1	0
FAD binding domain	IPR002938	41	24	11	13	12	10	15	19	14	18	39	7	15	9	11	13	8	11	7	11	6	10	12	36
AAA domain	IPR041679	19	25	19	14	16	11	17	23	8	35	28	6	8	20	14	8	15	13	12	12	14	8	12	17
Glycosyl transferase family 90	IPR006598	30	52	43	34	5	8	36	21	3	10	26	6	6	10	4	3	6	4	11	13	8	16	19	14
EamA-like transporter family	IPR000620	24	31	23	19	8	17	10	21	9	32	41	4	9	9	11	10	8	13	11	17	4	12	7	23
Ferredoxin reductase-type FAD binding domain	IPR017927	27	23	24	18	13	11	13	20	13	19	27	9	16	9	11	12	10	10	10	17	20	11	13	19
ABC-2 type transporter	IPR013525	25	13	16	8	18	19	20	11	22	24	20	14	6	25	14	38	9	9	11	14	11	10	10	13
HSF-type DNA-binding	IPR000232	10	12	7	9	21	1	2	5	0	0	9	6	1	6	4	6	1	11	5	70	1	41	99	1
Cytochrome P450	IPR001128	11	10	10	10	10	25	36	10	37	27	23	8	6	14	12	16	11	6	4	12	13	15	12	26
ATP-grasp fold	IPR011761	22	26	21	11	20	13	11	25	11	18	32	11	12	12	7	15	9	16	15	16	12	7	19	8
DNA2/NAM7 HELICASE FAMILY	IPR045055	20	24	22	13	12	10	13	22	8	34	32	5	7	22	12	9	16	17	9	10	12	7	13	15
Fatty acid desaturase	IPR005804	29	28	20	12	12	7	10	24	12	14	35	9	7	13	15	13	13	15	11	14	11	12	18	10
UPF0187 PROTEIN YNEE	IPR044669	48	40	29	33	5	17	9	21	5	8	37	1	6	11	9	3	5	22	8	13	6	16	9	7
Ion channel	IPR013099	34	41	36	30	27	3	2	45	5	17	15	1	5	43	2	3	2	5	10	14	8	11	4	9
NAD dependent epimerase/dehydratase family	IPR001509	30	36	18	28	16	9	13	21	13	11	35	9	12	14	9	12	9	12	5	12	10	11	12	11
PCI domain PCI domain	IPR000717	20	17	17	11	13	15	15	16	15	13	16	19	16	18	14	15	17	15	11	12	16	8	16	20
Methyltransferase domain	IPR041698	25	29	36	32	19	8	15	26	11	15	30	5	4	16	8	10	10	12	14	12	5	4	8	13
BRCA1 C Terminus (BRCT) domain BRCT domain twin BRCT domain	IPR001357	16	26	20	13	5	16	10	29	10	11	28	8	12	23	19	12	11	15	10	9	11	12	13	25
CBS domain CBS domain	IPR000644	25	19	16	14	12	15	14	10	17	10	20	16	11	10	22	16	15	10	11	14	24	11	14	12
Pyridoxal-phosphate dependent enzyme	IPR001926	29	22	22	18	17	15	12	24	13	11	35	7	9	11	11	10	10	11	11	13	12	13	12	10
RWP-RK domain RWP-RK domain	IPR003035	0	1	0	0	0	8	15	0	6	0	0	10	3	306	6	1	4	5	0	0	7	0	0	0
HEAT SHOCK PROTEIN 70KDA Hsp70 protein	IPR013126	23	26	20	19	11	13	10	22	10	13	25	8	6	24	11	12	8	20	11	11	5	19	15	16
HEAT SHOCK TRANSCRIPTION FACTOR	IPR027725	9	11	6	7	16	1	2	5	1	0	8	6	1	6	4	5	1	9	5	69	1	38	100	1
Subtilase family	IPR000209	11	9	10	14	20	22	12	17	12	27	29	1	14	18	8	11	2	14	11	19	3	11	7	51
Papain family cysteine protease	IPR000668	13	32	27	13	36	19	18	23	9	35	11	0	0	10	8	10	9	14	6	9	1	10	13	21
Twin arginine translocation (Tat) signal	IPR006311	33	36	18	26	13	13	21	14	1	2	39	0	8	8	20	11	3	21	13	11	7	13	5	7
SAM domain SAM domain (Sterile alpha motif)	IPR001660	34	45	50	24	8	7	8	32	3	10	15	3	5	46	11	0	1	7	11	3	4	12	2	11
PAS domain PAS repeat	IPR000014	25	25	22	20	16	6	19	27	8	5	32	2	0	32	4	10	2	13	15	14	2	16	18	9
Beta-ketoacyl synthase, N-terminal domain	IPR014030	11	19	27	16	82	13	4	12	13	36	15	2	1	6	10	9	19	4	6	4	2	2	4	29
Histidine kinase domain	IPR005467	17	15	8	14	5	4	10	6	5	124	7	3	1	18	7	4	2	32	12	15	1	5	4	17
Beta-lactamase superfamily domain Metallo-beta-lactamase superfamily Metallo-beta-lactamase superfamily domain	IPR001279	19	19	16	14	11	15	11	15	15	15	20	12	12	18	12	18	12	9	6	15	16	7	13	19
TTL domain Tubulin-tyrosine ligase family	IPR004344	25	35	38	25	22	2	12	41	3	22	13	0	0	34	7	5	1	13	15	7	0	3	4	18
ADP-ribosylation factor family	IPR006689	25	25	21	23	10	8	17	20	8	21	23	15	10	14	12	9	8	22	4	7	12	6	8	11
HECT-domain (ubiquitin-transferase) HECT domain	IPR000569	33	28	27	23	20	8	11	18	8	11	31	4	4	25	10	11	8	8	10	10	4	7	7	11
Rab-GTPase-TBC domain TBC/rab GAP domain	IPR000195	19	26	27	15	7	8	12	24	9	21	14	8	9	24	8	10	8	14	13	10	12	5	7	26
Zinc-binding dehydrogenase	IPR013149	30	17	19	11	15	10	10	15	15	30	21	15	8	15	6	8	7	9	9	9	7	7	7	30
Repeat domain in Vibrio, Colwellia, Bradyrhizobium and Shewanella FG-GAP repeat	IPR013517	3	23	19	12	63	1	0	60	1	18	12	1	12	5	7	5	0	0	6	1	2	68	16	4
AAA domain	IPR041677	17	18	20	15	7	10	14	22	7	31	24	6	7	14	14	6	16	7	10	11	14	7	8	14
PAN domain PAN/Apple domain	IPR003609	14	33	35	17	1	20	14	13	6	26	21	0	0	10	4	0	1	4	1	0	0	3	0	113
VOLTAGE-GATED CATION CHANNEL CALCIUM AND SODIUM	IPR043203	15	26	27	10	13	4	6	56	0	20	9	0	0	90	6	1	5	11	5	3	2	3	4	18
Sodium/hydrogen exchanger family	IPR006153	21	27	29	11	20	10	8	19	12	15	20	8	7	12	8	12	8	9	9	12	8	14	13	10
AGC-kinase C-terminal domain	IPR000961	32	37	44	20	29	4	8	16	7	11	13	3	4	8	6	7	6	8	16	6	7	11	15	6
Glycosyltransferase sugar-binding region containing DXD motif	IPR007577	32	51	30	33	3	7	6	25	6	7	34	5	1	8	2	3	5	5	7	9	4	15	17	11
PAP_fibrillin	IPR006843	26	21	14	23	9	8	14	18	7	7	24	4	10	10	18	8	9	12	8	15	11	15	11	10
Alcohol dehydrogenase GroES-like domain	IPR013154	24	14	22	10	12	11	11	19	12	24	15	17	8	19	8	9	9	10	5	12	9	9	13	16
Aldehyde dehydrogenase family	IPR015590	19	19	20	16	21	9	10	13	11	16	24	19	5	17	6	12	7	9	10	10	12	8	9	15
TLD TLDc domain	IPR006571	10	12	13	7	5	1	3	8	3	19	19	1	4	10	1	6	3	10	5	10	4	16	13	134
CobW/HypB/UreG, nucleotide-binding domain	IPR003495	25	25	29	24	19	10	8	18	7	18	31	1	4	17	6	6	9	15	7	6	5	9	7	10
Serine aminopeptidase, S33	IPR022742	23	16	13	11	16	10	15	19	12	20	17	6	13	19	6	9	8	7	16	8	13	7	10	22
RAP domain RAP domain	IPR013584	21	15	5	11	4	5	13	7	5	22	74	0	0	10	3	3	4	54	21	2	0	18	4	23
PX domain PX domain	IPR001683	20	35	41	15	13	4	5	39	5	10	21	2	1	30	4	9	7	17	13	6	1	4	6	11
Oxidoreductase NAD-binding domain	IPR001433	26	21	18	15	17	11	8	22	10	10	22	10	11	9	8	9	10	9	9	15	10	12	11	10
MatE	IPR002528	23	28	16	13	7	13	14	16	8	8	33	3	1	12	11	9	12	6	10	14	7	16	14	5
2Fe-2S ferredoxin-type iron-sulfur binding domain 2Fe-2S iron-sulfur cluster binding domain	IPR001041	15	17	14	13	9	15	14	19	8	12	27	7	7	10	9	15	8	17	16	15	12	7	11	15
S1 domain S1 RNA binding domain	IPR003029	11	17	12	10	13	12	9	16	10	13	17	21	12	9	13	13	15	10	9	16	15	11	12	13
FAD dependent oxidoreductase	IPR006076	20	28	18	19	7	7	12	21	7	13	31	5	7	10	5	9	6	10	6	14	8	15	15	10
Phosphopantetheine attachment site Carrier protein (CP) domain	IPR009081	17	25	23	25	20	4	3	15	14	40	25	4	1	6	9	10	6	3	6	6	2	3	3	47
Retrotransposon gag protein	IPR005162	0	0	0	0	0	2	6	0	1	148	0	0	2	0	0	0	0	0	0	0	158	0	0	4
SNARE domain t-SNARE coiled-coil homology domain	IPR000727	18	14	15	14	10	13	12	16	10	16	11	15	11	13	12	11	12	12	9	13	10	7	13	16
Fibronectin type-III domain	IPR003961	29	57	61	24	9	10	4	28	1	5	18	0	1	27	3	2	1	6	11	1	0	8	9	4
Helicase associated domain	IPR005114	4	17	3	1	5	3	1	3	1	0	9	1	2	11	2	0	4	10	19	26	1	86	52	0
Integrase zinc binding domain	IPR041588	0	0	0	1	1	0	0	0	0	179	0	0	0	2	0	0	0	0	0	0	119	9	0	6
Dual specificity protein phosphatase domain	IPR020422	22	22	18	13	9	8	11	22	11	30	16	4	5	46	7	6	1	6	9	4	10	7	8	18
Phosphatidylinositol 3- and 4-kinases family Phosphatidylinositol 3- and 4-kinase	IPR000403	17	19	23	11	17	7	10	15	10	12	21	8	9	18	9	15	8	9	13	10	10	10	11	11
Glycosyl transferase family 2	IPR001173	16	24	30	16	18	4	5	12	6	18	31	9	22	20	6	9	7	6	3	11	7	7	5	18
Biotinyl/lipoyl domain Biotin-requiring enzyme	IPR000089	13	17	14	14	14	13	12	16	11	13	22	12	8	10	10	14	8	7	9	16	15	8	14	10
TCP-1/cpn60 chaperonin family	IPR002423	13	15	13	12	16	11	14	18	11	14	16	12	10	12	12	13	13	15	10	11	12	8	10	13
Helicase associated domain (HA2)	IPR007502	19	20	13	12	11	8	4	19	11	9	22	7	11	12	19	13	15	9	13	9	11	8	11	15
Glutathione S-transferase, C-terminal domain	IPR004046	21	24	17	12	19	4	11	18	5	20	29	11	4	13	7	5	7	12	9	12	9	4	6	20
Nucleotide-sugar transporter NUCLEOTIDE-SUGAR TRANSMEMBRANE TRANSPORTER	IPR007271	42	37	22	32	14	3	1	30	3	10	39	0	2	6	2	3	4	13	8	8	0	7	9	5
Galactosyltransferase BETA-1,3-N-ACETYLGLUCOSAMINYLTRANSFERASE	IPR002659	49	61	39	40	1	6	1	27	8	3	34	5	1	1	1	2	0	5	6	2	3	3	1	2
Histone deacetylase domain	IPR023801	21	22	20	17	7	11	14	19	12	9	25	3	6	13	9	10	9	11	11	12	5	7	9	12
Glutaredoxin	IPR002109	27	25	11	19	6	12	8	11	8	12	23	5	7	17	10	8	6	10	8	9	12	11	10	11
Beta-ketoacyl synthase, C-terminal domain	IPR014031	11	19	22	16	40	14	4	14	13	37	15	2	1	4	10	8	15	3	6	3	2	2	3	29
Sodium/calcium exchanger protein	IPR004837	22	30	31	15	22	4	6	21	3	11	23	1	3	10	6	4	4	25	11	6	4	9	10	9
Putative ephrin-receptor like	IPR011641	10	19	11	12	17	23	7	13	1	25	3	1	6	93	6	0	4	5	2	0	0	0	0	36
GDSL-like Lipase/Acylhydrolase family	IPR013830	29	33	35	29	14	17	3	14	11	6	30	1	2	4	4	5	4	5	10	8	5	14	4	2
PLASTID-LIPID-ASSOCIATED PROTEIN 4, CHLOROPLASTIC-RELATED	IPR039633	21	14	12	18	5	8	18	14	7	7	22	4	7	9	16	7	8	10	9	11	7	14	15	10
Rieske [2Fe-2S] iron-sulfur domain Rieske [2Fe-2S] domain	IPR017941	9	14	7	11	13	16	15	12	17	15	24	4	6	9	10	15	10	11	8	7	6	13	7	22
OTU-like cysteine protease OTU domain	IPR003323	14	23	17	17	7	6	8	39	6	10	10	8	7	14	8	12	10	14	11	5	9	12	5	12
TLC domain TLC domain	IPR006634	38	30	19	24	7	9	10	25	6	8	19	3	2	7	7	8	9	6	8	11	6	4	8	6
Trypsin Serine proteases, trypsin domain	IPR001254	9	10	29	10	1	30	5	1	2	7	35	0	19	5	4	2	1	0	2	7	7	37	24	8
CYCLINS	IPR039361	23	9	8	12	5	3	7	6	4	4	12	6	9	9	4	7	5	6	4	18	4	38	47	18
PCMH-type FAD-binding domain	IPR016166	24	12	15	14	8	12	8	10	9	19	32	4	11	8	6	14	5	10	5	6	7	16	7	17
Basic-leucine zipper (bZIP) domain bZIP transcription factor Basic region leucine zipper	IPR004827	11	7	4	10	4	9	14	3	23	3	5	23	32	15	13	10	10	6	5	22	19	12	11	3
Cobalamin synthesis protein cobW C-terminal domain	IPR011629	25	25	25	20	11	9	11	15	7	17	29	1	3	14	6	4	7	11	5	5	5	6	6	9
SANT domain	IPR017884	6	9	12	3	11	7	8	10	7	7	9	27	19	21	12	18	13	1	5	12	18	14	10	13
Adenylate kinase [adk] NUCLEOTIDE KINASE	IPR000850	16	22	20	14	8	6	9	25	7	15	13	8	6	17	8	8	6	15	4	8	9	9	9	12
ABC-2 type transporter	IPR043926	10	9	16	10	17	12	15	7	13	15	19	10	4	19	7	25	5	8	8	12	6	7	9	10
Patatin-like phospholipase Patatin-like phospholipase (PNPLA) domain	IPR002641	15	18	17	15	7	9	8	9	9	12	26	5	4	17	10	11	9	7	9	10	7	10	12	12
ThiF family	IPR000594	11	15	22	11	13	10	9	18	9	10	16	7	7	11	11	11	9	12	10	10	5	11	10	9
Glycosyl transferases group 1	IPR001296	18	13	18	10	8	15	16	9	15	7	11	9	9	24	15	9	15	5	10	4	7	6	6	10
Haloacid dehalogenase-like hydrolase	IPR041492	14	14	11	9	11	15	12	17	10	14	14	11	8	13	11	10	12	8	7	10	9	8	7	10
2,5-DIKETO-D-GLUCONIC ACID REDUCTASE GH17980P-RELATED	IPR020471	27	39	22	21	19	5	4	23	5	9	26	3	2	4	3	4	3	10	9	7	1	8	8	2
Sulfotransferase domain	IPR000863	46	28	29	31	14	2	4	8	0	0	23	0	3	9	3	10	2	8	7	11	2	6	14	4
SpoU rRNA Methylase family	IPR001537	19	19	13	17	8	7	11	21	5	13	19	6	5	13	12	8	10	7	8	8	6	7	10	10
Eukaryotic aspartyl protease Peptidase family A1 domain	IPR033121	25	32	21	25	7	3	3	17	8	13	8	9	5	24	2	8	4	5	3	6	4	6	8	16
Cysteine proteinase, calpain-type, catalytic domain Calpain family cysteine protease	IPR001300	19	26	24	19	12	0	5	23	0	49	26	0	0	13	6	2	3	10	10	1	0	2	1	12
HEAT repeat	IPR021133	11	13	14	9	8	11	12	13	9	14	14	5	11	23	14	8	9	10	5	10	9	5	7	14
Polycystin cation channel	IPR013122	26	37	37	20	7	1	11	25	0	14	1	0	0	51	2	0	0	5	4	0	0	0	0	25
Poly(ADP-ribose) polymerase catalytic domain PARP catalytic domain	IPR012317	16	34	24	13	6	1	2	54	0	21	38	0	1	23	0	1	0	11	5	0	0	2	0	12
ATP-BINDING CASSETTE SUB-FAMILY B	IPR039421	15	19	22	14	15	9	7	8	9	12	30	7	11	8	6	9	3	9	10	6	7	6	10	4
ACTIN Actin	IPR004000	15	20	11	12	16	5	5	14	6	16	34	8	11	12	4	10	6	10	5	7	8	5	6	8
Tubulin/FtsZ family, GTPase domain	IPR003008	24	17	12	21	17	4	10	15	6	10	27	11	4	7	8	9	7	11	6	6	3	3	8	12
Cellulase (glycosyl hydrolase family 5)	IPR001547	26	42	34	28	3	7	4	20	24	3	28	0	1	6	3	13	3	3	0	1	1	2	1	5
Elongation factor Tu domain 2	IPR004161	12	10	8	6	10	10	9	11	11	11	8	12	12	15	13	11	16	7	8	10	10	8	14	11
Insulinase (Peptidase family M16)	IPR011765	13	18	13	13	10	6	7	16	9	11	18	6	5	12	7	10	7	10	5	10	10	6	11	13
PUB domain	IPR018997	18	19	22	16	2	6	5	26	3	14	20	0	1	6	7	7	2	13	12	11	2	10	11	16
Mycoplasma protein of unknown function, DUF285	IPR005046	12	23	61	16	1	0	0	0	0	0	38	0	0	0	8	0	9	0	3	7	13	37	0	0
'Homeobox' domain Homeodomain	IPR001356	17	28	16	23	0	3	3	31	2	0	26	2	6	10	15	1	7	27	4	3	11	8	10	1
Dynein heavy chain C-terminal domain	IPR041228	20	30	23	12	19	3	15	20	2	13	13	0	1	27	13	4	2	17	5	0	0	2	3	13
BETA-SITE APP-CLEAVING ENZYME, ISOFORM A-RELATED ASPARTYL PROTEASES	IPR001461	24	29	20	24	7	3	3	15	8	12	8	9	5	19	2	8	4	5	3	6	4	6	8	16
Prolyl oligopeptidase family	IPR001375	17	17	19	15	11	7	9	13	8	15	20	11	5	9	5	4	3	10	5	5	9	9	9	8
3'5'-cyclic nucleotide phosphodiesterase 3'5'-cyclic nucleotide phosphodiesterase domain	IPR002073	11	14	19	7	10	2	29	13	3	44	3	0	0	16	4	0	2	4	3	21	0	9	13	17
pfkB family carbohydrate kinase	IPR011611	12	24	21	10	9	11	9	14	9	9	17	6	7	8	10	8	9	9	7	7	7	7	6	8
Taurine catabolism dioxygenase TauD, TfdA family	IPR003819	16	32	12	8	10	7	3	15	7	35	45	1	1	4	2	4	1	6	2	7	1	7	5	12
Calponin homology (CH) domain Calponin homology (CH) domain	IPR001715	24	23	29	16	14	3	6	17	4	6	34	1	3	20	6	6	2	13	9	3	1	1	2	5
Dynein heavy chain, N-terminal region 2	IPR013602	12	27	17	7	18	2	14	20	2	15	3	0	1	32	13	4	2	19	17	1	0	1	4	17
Aminotransferase class-V	IPR000192	8	13	12	5	14	12	10	12	10	20	8	8	8	16	10	7	6	8	11	10	9	6	5	11
Hydrolytic ATP binding site of dynein motor region	IPR035699	12	25	16	9	19	4	15	24	2	13	5	0	1	30	13	4	2	18	14	1	0	2	4	14
ATP-binding dynein motor region	IPR035706	16	25	21	11	18	3	14	24	2	14	3	0	1	29	13	4	2	14	13	0	0	2	4	14
Acyltransferase	IPR002123	15	14	7	10	7	7	9	11	9	10	14	10	10	16	6	11	7	11	9	7	11	7	11	11
Lectin C-type domain C-type lectin domain	IPR001304	14	32	29	42	6	0	12	15	0	21	26	0	3	15	0	2	0	7	5	0	0	0	0	17
SAM-dependent MTase RsmB/NOP-type domain 16S rRNA methyltransferase RsmB/F	IPR001678	11	22	26	12	2	5	6	19	4	10	16	6	2	16	7	9	8	9	6	6	5	7	10	13
Microtubule-binding stalk of dynein motor	IPR024743	14	21	21	10	20	4	15	20	2	16	3	0	1	26	13	4	2	17	14	0	0	2	4	15
P-loop containing dynein motor region D4	IPR024317	14	24	23	10	19	3	14	19	2	14	5	0	1	27	13	4	2	15	13	0	0	2	4	16
Pentacotripeptide-repeat region of PRORP	IPR033443	13	14	18	6	2	13	6	14	13	23	17	5	3	18	7	19	10	4	3	6	10	2	3	10
PROBABLE MEMBRANE PROTEIN DUF221-RELATED	IPR045122	24	26	29	17	10	5	13	14	5	3	8	2	5	5	9	9	7	4	9	9	4	8	5	4
2OG-Fe(II) oxygenase superfamily	IPR044861	16	27	12	15	7	6	3	15	10	17	25	1	4	4	7	5	6	8	8	8	3	7	7	10
Filamin/ABP280 repeat Filamin/ABP280 repeat	IPR017868	11	34	24	15	4	2	2	84	1	4	3	0	0	28	6	2	0	12	4	0	0	1	1	5
3'-5' exonuclease	IPR002562	18	15	16	8	6	6	11	16	8	16	15	2	3	8	11	6	7	11	10	6	5	8	8	13
FAD binding domain	IPR006094	23	9	15	14	6	10	6	9	8	15	26	3	9	7	6	12	5	8	3	5	6	13	5	10
PEPTIDYL-PROLYL CIS-TRANS ISOMERASE-RELATED	IPR044666	21	16	15	18	14	6	5	13	5	7	23	6	4	6	6	7	5	8	10	9	1	10	8	5
BTB And C-terminal Kelch	IPR011705	45	52	8	31	3	3	8	19	5	5	28	3	5	13	0	4	0	4	1	1	1	0	0	0
Magnesium transporter NIPA UNCHARACTERIZED	IPR008521	28	36	28	22	0	4	4	32	2	5	28	3	3	13	2	1	1	10	2	1	6	1	2	4
Enoyl-CoA hydratase/isomerase	IPR001753	15	16	15	14	19	8	5	10	7	10	20	4	6	6	4	10	5	7	5	9	6	9	10	7
Dynein heavy chain AAA lid domain	IPR041658	18	23	19	11	17	3	15	20	2	13	8	0	1	26	13	4	2	15	9	0	0	1	4	13
Zinc finger RING-CH-type RING-variant domain	IPR011016	31	13	16	17	6	6	14	13	4	16	16	4	1	6	9	3	6	13	5	3	5	5	2	19
Oligonucleotide/oligosaccharide-binding (OB)-fold	IPR011709	16	11	8	8	9	6	7	12	10	8	10	5	9	8	18	12	12	6	9	9	9	7	8	10
ACT domain ACT domain	IPR002912	14	13	14	7	6	9	11	17	12	5	7	12	7	4	13	7	11	3	7	11	9	7	9	11
Dynamin family	IPR045063	10	20	11	12	17	8	14	18	6	18	17	1	3	8	4	10	4	11	7	5	5	9	5	8
Dihydrouridine synthase (Dus)	IPR035587	15	16	13	11	11	4	6	17	4	8	17	5	4	11	8	7	8	7	13	11	5	6	8	8
Metallopeptidase family M24	IPR000994	10	8	13	10	12	8	9	9	9	12	12	9	8	10	9	9	10	9	9	8	9	7	9	8
ZIP Zinc transporter	IPR003689	14	15	10	8	3	7	12	11	6	13	20	3	5	17	5	7	8	8	6	10	4	8	9	15
Peptidase M16 inactive domain	IPR007863	14	15	10	8	7	8	8	11	9	11	14	6	4	13	7	14	8	5	3	8	10	8	10	11
Elongation factor G C-terminus	IPR000640	13	11	6	9	6	7	7	10	9	11	13	8	10	9	9	10	10	9	8	10	10	9	9	10
Rhomboid family	IPR022764	14	13	11	7	11	8	15	10	12	12	11	9	5	11	8	7	5	4	3	12	5	10	9	8
Dynein heavy chain region D6 P-loop domain	IPR004273	18	25	19	10	17	3	15	18	2	12	5	0	0	25	13	4	2	16	9	0	0	3	3	13
Zinc finger, C3HC4 type (RING finger)	IPR018957	16	23	14	7	7	7	11	14	6	20	20	1	3	6	6	2	6	5	9	6	8	9	5	17
Fasciclin domain FAS1/BIgH3 domain	IPR000782	3	4	1	3	3	26	16	20	9	7	8	7	5	1	9	5	5	8	3	9	2	12	5	22
SAM-dependent methyltransferase PRMT-type domain PROTEIN ARGININE N-METHYLTRANSFERASE	IPR025799	21	19	16	12	15	5	6	19	6	14	14	3	4	10	9	8	5	5	8	3	3	7	7	7
Putative GTPase activating protein for Arf ARF GTPase-activating proteins domain	IPR001164	12	21	12	12	13	6	6	15	4	3	23	3	6	7	7	9	7	9	7	10	6	9	8	4
Oxidoreductase family, NAD-binding Rossmann fold	IPR000683	22	19	14	14	12	2	3	9	3	10	19	9	10	5	1	9	0	4	8	8	9	7	17	5
2OG-Fe(II) oxygenase superfamily	IPR027450	15	23	17	15	7	4	6	16	5	7	18	1	4	6	14	7	8	5	9	6	4	9	8	7
AMP-binding enzyme C-terminal domain	IPR025110	14	14	17	6	21	12	7	6	9	9	13	11	7	6	9	9	7	4	9	5	9	7	5	6
NLI interacting factor-like phosphatase FCP1 homology domain	IPR004274	8	14	10	8	6	8	10	12	12	11	10	12	5	10	8	7	9	11	7	7	8	4	7	17
Phosphotransferase enzyme family	IPR002575	9	16	11	12	11	3	4	16	6	11	20	1	20	5	7	5	8	12	9	10	3	7	7	8
CHAPERONIN	IPR017998	9	9	8	8	14	8	8	11	8	10	12	9	8	9	8	9	10	12	7	8	9	6	8	10
Ammonium Transporter Family	IPR024041	8	16	12	18	9	6	8	8	4	15	28	2	4	26	5	2	4	9	2	9	3	9	6	9
SPFH domain / Band 7 family	IPR001107	25	19	15	13	10	5	4	9	9	8	14	5	7	8	5	5	3	4	5	8	6	9	9	13
Glutamine amidotransferase domain Glutamine amidotransferase type 2 domain Glutamine amidotransferases class-II	IPR017932	12	11	13	9	8	8	7	7	5	11	14	7	5	9	7	7	8	12	10	8	6	13	11	7
CBM20 (carbohydrate binding type-20) domain Starch binding domain	IPR002044	4	3	2	4	0	19	12	3	8	60	2	5	7	21	14	2	3	2	0	0	17	0	0	34
HEPARAN SULFATE SULFOTRANSFERASE	IPR037359	38	34	32	25	11	5	5	8	0	0	20	0	0	2	0	6	1	5	9	3	2	4	6	0
Glycosyl transferase family 8	IPR002495	26	24	22	21	8	2	0	22	2	7	27	4	1	11	0	1	1	4	8	4	4	6	2	12
Adaptin N terminal region	IPR002553	8	9	11	5	11	7	7	10	7	11	11	8	6	10	9	9	10	10	8	9	7	8	10	9
TUBULIN	IPR000217	18	11	6	17	17	3	8	14	5	10	27	9	4	7	6	6	5	12	4	3	3	4	4	12
Amidohydrolase family Amidohydrolase	IPR006680	13	18	13	10	17	7	5	13	7	11	17	5	6	12	3	10	4	7	6	6	5	3	5	7
Importin-beta N-terminal domain Importin-beta N-terminal domain	IPR001494	8	14	14	8	8	8	8	11	11	9	9	6	6	14	11	9	6	9	4	6	6	7	6	12
DNA REPLICATION LICENSING FACTOR MCM FAMILY MEMBER	IPR031327	7	9	12	7	13	8	8	8	8	9	13	8	10	9	9	8	8	9	7	8	8	6	7	8
Pentapeptide repeats (8 copies) Pentapeptide repeats (9 copies)	IPR001646	7	6	7	16	2	4	4	14	2	4	88	2	4	7	6	3	5	7	1	2	9	2	2	5
DnaJ C terminal domain	IPR002939	9	10	12	6	11	8	10	10	8	8	10	8	7	15	8	8	8	10	6	8	6	5	7	7
Cyclin, C-terminal domain	IPR004367	23	10	7	10	2	5	8	4	6	5	7	4	4	8	4	5	5	4	3	11	2	11	18	32
Fatty acid hydroxylase superfamily	IPR006694	10	16	16	9	8	7	5	15	4	16	23	8	4	7	5	7	4	9	4	9	5	5	4	7
Aminotransferases class-III pyridoxal-phosphate attachment site Aminotransferase class-III	IPR005814	12	14	16	7	11	8	7	18	7	9	12	8	4	5	4	7	5	9	6	9	6	7	6	6
TIR domain	IPR000157	29	40	18	17	3	0	3	25	0	1	56	0	1	10	1	0	0	3	2	0	1	0	0	0
Cold-shock (CSD) domain 'Cold-shock' DNA-binding domain	IPR002059	19	28	14	23	11	3	2	16	3	9	27	0	0	5	4	1	3	5	7	6	3	6	5	4
Anticodon binding domain	IPR004154	11	10	15	6	10	8	6	9	7	9	13	6	7	14	7	8	7	4	7	8	7	6	8	8
MPN domain	IPR037518	9	9	9	8	9	9	10	8	13	8	9	11	9	11	8	8	7	9	5	6	6	6	6	8
Pyridine nucleotide-disulphide oxidoreductase, dimerisation domain	IPR004099	11	14	13	9	9	4	5	10	5	8	10	5	4	14	4	10	4	7	4	10	10	7	10	11
alpha/beta hydrolase fold	IPR013094	22	24	20	11	7	2	3	15	4	8	30	1	3	4	4	7	2	7	9	3	1	6	6	4
Domain of unknown function (DUF1995)	IPR018962	11	10	9	11	4	6	5	9	6	3	10	6	10	7	8	6	7	9	5	11	10	11	12	7
Dynein heavy chain AAA lid domain	IPR041466	12	22	10	9	16	3	13	18	2	10	3	0	0	28	12	4	2	8	11	0	0	3	4	14
OBG-type guanine nucleotide-binding (G) domain	IPR031167	12	11	7	5	7	6	8	8	7	11	8	8	7	11	9	7	9	7	4	9	7	7	8	12
SOLUTE CARRIER FAMILY 35 MEMBER B UAA transporter family	IPR013657	17	23	8	15	10	3	4	15	2	4	15	2	3	8	6	7	7	3	5	10	3	12	10	4
AAA+ lid domain	IPR041589	14	21	12	9	16	3	14	18	2	11	4	0	0	23	12	3	2	12	11	0	0	2	3	11
Vicinal oxygen chelate (VOC) domain	IPR037523	6	5	10	4	7	8	9	6	10	8	12	11	17	9	5	11	4	6	6	5	8	10	8	11
Cation transporter/ATPase, N-terminus	IPR004014	5	8	1	4	12	9	11	10	7	25	14	3	4	13	5	13	7	7	9	9	6	3	7	8
MCM P-loop domain MCM family domain	IPR001208	7	8	12	4	12	7	8	8	8	8	11	8	8	8	9	8	8	9	7	8	8	5	7	8
CW-type Zinc Finger Zinc finger CW-type	IPR011124	19	37	25	15	3	4	3	15	6	3	25	0	1	3	10	4	2	1	6	3	1	3	5	4
SNARE associated Golgi protein	IPR032816	13	18	13	11	3	7	6	14	7	11	13	3	2	11	7	5	4	9	4	4	4	8	6	10
tRNA synthetase class II core domain (G, H, P, S and T)	IPR002314	10	7	11	6	8	7	6	8	7	9	12	7	7	13	7	8	7	6	8	7	7	6	8	7
Cytidine and deoxycytidylate deaminase zinc-binding region Cytidine and deoxycytidylate deaminases domain	IPR002125	11	12	11	9	4	9	7	7	6	12	10	7	8	7	7	6	6	7	4	9	8	5	8	10
v-SNARE coiled-coil homology domain	IPR042855	12	12	12	13	11	4	10	10	6	8	13	4	4	6	6	7	3	8	5	7	5	8	8	8
D-isomer specific 2-hydroxyacid dehydrogenase, NAD binding domain	IPR006140	11	12	7	8	11	6	8	11	10	7	17	8	6	6	5	5	5	4	7	9	6	6	7	9
TRIAD supradomain	IPR044066	11	12	14	5	9	6	6	13	6	13	14	0	2	19	3	8	2	4	6	3	1	7	4	22
JAB1/Mov34/MPN/PAD-1 ubiquitin protease	IPR000555	9	8	9	8	10	9	9	8	10	9	8	9	7	9	9	7	8	7	5	5	7	6	7	8
PROTEIN DETOXIFICATION 44, CHLOROPLASTIC-RELATED	IPR044644	12	14	14	8	5	6	4	9	4	4	18	2	1	9	7	7	6	6	7	9	6	11	11	2
PpiC-type peptidyl-prolyl cis-trans isomerase family PPIC-type PPIASE domain	IPR000297	24	21	12	18	4	2	2	13	2	2	20	4	4	6	4	3	3	8	5	7	5	7	7	2
tRNA synthetases class I (I, L, M and V)	IPR002300	7	7	10	5	6	7	6	9	6	10	10	8	20	9	6	8	6	11	4	7	7	7	7	5
MCM OB domain	IPR033762	7	8	9	6	10	6	7	8	8	8	11	8	8	9	8	8	8	8	7	8	8	4	7	8
Calcium-binding EGF domain	IPR001881	0	3	2	2	0	2	4	1	1	146	0	0	0	13	1	0	1	1	1	1	0	0	1	14
UBX domain UBX domain	IPR001012	10	13	14	7	3	7	6	16	8	7	13	5	6	10	8	5	6	6	5	7	6	6	5	9
MCM AAA-lid domain	IPR041562	7	8	11	3	10	7	8	7	8	8	12	7	8	8	9	8	8	6	7	8	8	5	7	8
Sirtuin catalytic domain	IPR026590	12	18	11	11	3	4	3	12	3	14	21	4	3	7	4	4	1	7	6	7	5	10	9	5
Proteasome beta-type subunit	IPR023333	7	8	7	8	8	8	8	7	9	8	8	9	7	8	7	10	7	5	8	10	8	6	9	7
Protein kinases ATP-binding region	IPR017441	15	15	14	9	5	7	5	4	5	5	31	4	8	6	3	3	6	6	6	4	5	4	6	11
Peptide methionine sulfoxide reductase Peptide methionine sulfoxide reductase MsrA [msrA]	IPR002569	21	18	8	18	11	3	4	14	3	3	12	1	3	6	6	5	6	10	6	10	2	3	6	4
Synaptobrevin	IPR001388	12	14	12	13	10	4	10	10	6	8	13	3	4	5	6	6	3	8	5	6	5	7	7	8
Diacylglycerol acyltransferase	IPR007130	16	13	11	4	10	7	6	13	8	13	20	2	0	5	6	11	5	6	5	5	1	3	5	12
Glycosyltransferase family 29 (sialyltransferase)	IPR001675	32	46	24	27	0	0	0	16	0	1	24	0	0	3	0	0	0	18	1	0	0	0	0	0
RBR FAMILY RING FINGER AND IBR DOMAIN-CONTAINING	IPR031127	12	15	14	7	9	6	6	9	5	15	16	0	2	20	3	6	2	5	3	2	1	5	3	19
HISTONE H3	IPR000164	8	8	2	8	8	12	35	6	10	3	22	2	3	5	5	3	4	7	1	5	4	13	8	4
non-haem dioxygenase in morphine synthesis N-terminal	IPR026992	9	19	11	7	6	7	2	10	10	16	24	2	2	4	4	6	4	7	5	4	3	5	4	11
BTB/POZ domain	IPR003131	14	14	14	9	4	1	1	8	2	6	13	1	0	11	2	0	0	6	8	0	2	21	8	39
Glutamine amidotransferase class-I	IPR017926	10	8	7	5	8	7	5	9	7	8	13	9	5	8	7	7	6	8	5	10	6	7	8	8
Sterol-sensing domain (SSD) Sterol-sensing domain of SREBP cleavage-activation	IPR000731	19	20	16	8	10	1	3	6	1	23	14	0	2	9	5	1	5	11	3	4	4	4	4	17
Right handed beta helix region	IPR039448	16	16	21	11	4	3	8	16	6	4	18	0	0	42	2	1	3	6	2	2	1	5	0	0
Zinc carboxypeptidase	IPR000834	14	20	17	11	7	3	8	15	5	7	11	1	4	14	6	1	2	6	5	3	4	8	4	10
Bacterial transferase hexapeptide (six repeats)	IPR001451	10	10	9	8	9	5	7	7	8	5	9	11	5	9	6	9	5	5	7	6	13	5	8	6
Src homology 3 (SH3) domain Variant SH3 domain SH3 domain	IPR001452	8	22	33	15	16	1	0	18	1	6	10	1	1	17	0	1	0	6	11	1	1	2	2	15
VOLTAGE-GATED POTASSIUM CHANNEL	IPR028325	28	31	30	18	2	0	4	6	0	6	16	0	1	13	7	4	3	1	0	3	4	2	2	2
Flavodoxin Flavodoxin-like domain	IPR008254	8	10	10	9	5	6	10	8	10	10	11	6	3	8	6	5	9	6	3	8	5	7	8	8
Inositol monophosphatase family	IPR000760	14	9	14	8	6	5	6	6	4	7	9	4	6	5	8	6	8	4	5	6	8	8	11	8
Aspartyl/Asparaginyl beta-hydroxylase	IPR007803	17	20	19	14	13	2	0	24	0	2	16	0	1	3	2	5	1	4	13	8	1	6	3	3
tRNA pseudouridine synthase A [truA] PSEUDOURIDYLATE SYNTHASE	IPR001406	10	12	14	8	5	4	7	7	5	7	15	4	4	9	6	5	6	9	3	10	4	9	9	5
DNA MISMATCH REPAIR PROTEIN MUTS FAMILY MEMBER	IPR045076	3	9	9	5	6	9	7	7	9	7	11	9	8	9	10	8	8	7	5	7	7	5	7	6
Amino acid kinase family	IPR001048	10	9	13	6	8	9	8	5	7	7	7	7	6	8	8	5	8	4	6	9	6	4	11	5
Peroxidase Plant heme peroxidase family	IPR002016	7	9	7	4	4	4	7	5	7	7	10	9	7	7	7	5	5	6	6	11	3	19	16	4
Acyl-CoA dehydrogenase, middle domain	IPR006091	10	9	12	9	11	9	6	10	8	13	9	9	3	4	6	7	6	3	4	6	6	3	6	7
Patched family	IPR003392	20	17	17	6	10	1	2	2	1	21	10	0	3	8	5	1	5	15	3	3	4	4	5	18
RNase H-like domain found in reverse transcriptase	IPR041373	0	0	0	1	0	0	1	2	0	50	0	0	1	0	0	0	0	0	0	0	120	5	0	2
PEPTIDYL SERINE ALPHA-GALACTOSYLTRANSFERASE	IPR044845	25	24	17	16	1	8	5	15	7	0	24	0	0	2	6	2	5	8	1	5	0	5	3	0
ABC transporter	IPR032781	11	12	14	8	6	4	4	11	4	5	7	2	5	6	8	7	10	5	6	11	6	8	9	2
Anaphase-promoting complex subunit 4 WD40 domain	IPR024977	13	14	13	10	7	6	7	11	5	8	3	8	8	19	7	6	6	5	4	4	8	0	4	3
Serine carboxypeptidase SERINE PROTEASE FAMILY S10 SERINE CARBOXYPEPTIDASE	IPR001563	9	19	16	7	13	8	7	16	5	7	20	0	0	4	2	7	2	3	7	7	0	6	5	6
KR domain	IPR013968	5	18	15	8	5	1	1	9	9	33	31	0	0	0	4	5	1	1	4	0	0	1	1	29
Beta-lactamase	IPR001466	13	25	28	8	7	0	2	17	3	11	23	0	1	3	0	10	2	1	2	1	1	9	0	10
POTASSIUM CHANNEL, SUBFAMILY K	IPR003280	28	20	16	27	9	0	0	27	0	5	8	0	1	1	1	0	2	1	2	11	2	8	4	3
Zinc finger C2H2 type domain	IPR013087	5	3	2	5	2	2	0	13	0	5	4	2	17	3	6	3	2	72	2	0	27	1	1	1
LIS1 homology (LisH) motif	IPR006594	8	12	10	9	3	6	7	9	6	9	8	11	5	11	11	8	3	13	4	3	6	0	4	11
RecF/RecN/SMC N terminal domain	IPR003395	10	12	12	6	5	8	10	9	6	4	16	7	5	4	6	5	5	12	4	6	6	5	5	7
Photolyase/cryptochrome alpha/beta domain DNA photolyase	IPR006050	8	9	3	7	2	6	7	8	9	9	9	10	10	7	8	4	6	4	4	7	13	8	5	9
METHYLTRANSFERASE-LIKE PROTEIN 24	IPR026913	20	33	15	15	1	1	2	10	6	6	14	0	1	4	1	5	2	6	1	7	7	2	7	8
G-patch domain G-patch domain	IPR000467	7	11	8	12	2	9	8	10	10	7	12	8	6	10	7	7	7	9	8	3	5	1	2	6
Voltage gated chloride channel	IPR001807	17	16	7	11	6	7	5	5	8	5	14	5	5	8	5	5	4	3	3	9	7	5	3	7
S4 domain	IPR002942	6	12	4	8	7	7	8	6	7	7	12	6	7	11	10	8	6	6	5	5	7	3	5	8
Clathrin adaptor complex small chain	IPR022775	9	9	6	9	12	7	8	6	6	8	7	9	4	8	7	8	5	6	4	7	5	4	7	8
Histone-like transcription factor (CBF/NF-Y) and archaeal histone	IPR003958	14	12	6	15	6	7	6	11	7	4	5	7	4	7	6	7	6	8	7	5	5	4	6	5
Clp protease ATP-DEPENDENT CLP PROTEASE PROTEOLYTIC SUBUNIT	IPR023562	10	9	4	9	7	8	8	8	9	9	12	6	6	3	8	5	7	7	5	6	4	8	6	5
Cation efflux family	IPR002524	11	12	11	9	4	3	5	9	6	6	17	1	4	10	2	6	2	9	9	9	5	5	7	6
MutS domain V	IPR000432	3	8	8	5	6	6	7	7	9	7	7	9	8	8	10	8	8	6	5	7	7	5	7	6
Transketolase, pyrimidine binding domain	IPR005475	11	7	5	6	6	6	6	7	7	7	8	8	5	10	6	8	6	6	6	7	5	7	9	6
RNase H-like domain found in reverse transcriptase	IPR041577	0	0	0	0	0	0	0	0	1	147	0	0	0	2	0	0	0	0	0	0	5	12	0	5
UbiA prenyltransferase family	IPR000537	9	9	9	9	6	7	5	5	6	7	10	6	7	8	7	6	5	6	6	7	6	8	5	7
Snf7	IPR005024	8	8	5	6	6	6	6	9	6	7	8	9	7	11	6	8	4	6	3	8	7	5	7	8
NUCLEAR MOVEMENT PROTEIN NUDC	IPR037898	17	14	15	14	7	3	4	16	3	4	16	1	1	5	7	5	6	6	4	5	1	3	4	6
TRANSMEMBRANE 9 SUPERFAMILY PROTEIN Endomembrane protein 70	IPR004240	9	8	11	8	10	4	5	7	5	5	14	4	6	10	3	5	2	9	4	9	12	5	5	5
SODIUM/HYDROGEN EXCHANGER	IPR018422	10	17	18	5	8	7	4	10	7	7	8	5	3	5	2	8	3	8	2	8	5	4	5	6
Isochorismatase family	IPR000868	7	17	6	11	6	9	5	12	2	7	26	6	1	4	3	3	3	5	7	5	4	3	3	8
Exonuclease	IPR013520	10	11	6	9	5	8	4	11	6	10	10	2	3	9	7	4	7	8	3	7	3	6	4	8
Sir2 family	IPR003000	11	16	7	8	3	4	3	10	3	11	18	4	3	6	4	4	1	6	5	7	5	9	8	5
Sulfate permease family	IPR011547	11	19	14	7	6	9	3	10	4	3	12	2	0	4	3	10	2	10	3	6	0	9	8	7
Carbamoyl-phosphate synthase L chain, ATP binding domain	IPR005479	8	8	11	7	9	7	4	12	6	6	7	7	5	5	3	7	4	6	5	8	9	4	9	4
Proteasome alpha-type subunit	IPR023332	7	7	2	7	7	6	7	7	7	7	6	7	7	8	7	8	7	6	4	8	8	8	7	7
3' exoribonuclease family, domain 1	IPR001247	6	7	8	4	1	5	5	7	6	7	9	8	10	7	8	8	8	6	6	8	8	4	8	7
NEUROTRANSMITTER GATED ION CHANNEL	IPR006201	34	26	13	25	9	1	2	11	0	2	31	0	0	1	0	0	0	3	1	0	2	3	0	2
CHOLINE TRANSPORTER-LIKE (SLC FAMILY 44) Plasma-membrane choline transporter	IPR007603	16	16	21	8	1	1	4	17	2	3	14	0	0	3	4	6	3	6	4	8	0	6	10	6
Rubisco LSMT substrate-binding	IPR015353	8	13	18	7	2	9	8	11	6	4	3	3	6	7	12	5	13	2	5	4	3	4	4	6
C-5 cytosine-specific DNA methylase C-5 cytosine-specific DNA methylase (Dnmt) domain	IPR001525	6	7	14	35	7	7	7	8	7	5	10	1	0	2	12	1	5	2	1	4	0	7	4	6
FYVE zinc finger	IPR000306	6	19	19	10	14	1	2	13	1	2	10	0	1	11	3	13	0	5	7	7	1	3	4	6
Zinc finger FYVE/FYVE-related type	IPR017455	6	19	18	10	13	1	2	14	1	2	9	0	1	11	3	14	0	4	6	7	1	3	4	7
IBR domain, a half RING-finger domain	IPR002867	6	9	8	2	7	6	6	12	6	14	14	0	2	17	3	8	2	6	2	2	1	3	4	17
CPBP intramembrane metalloprotease	IPR003675	9	13	11	7	4	5	7	8	4	7	10	7	3	8	7	5	6	6	7	5	3	4	4	7
Tubulin C-terminal domain	IPR018316	18	8	2	16	13	3	6	2	5	8	18	9	4	4	5	5	5	7	2	3	3	1	4	10
Acyl-CoA dehydrogenase, C-terminal domain	IPR009075	9	7	11	7	11	7	4	11	6	13	10	6	2	6	4	6	4	3	4	6	6	2	6	5
THYLAKOID LUMENAL 29 KDA PROTEIN, CHLOROPLASTIC-RELATED	IPR044831	4	8	5	3	3	4	4	4	7	4	7	9	6	6	6	4	5	6	3	9	3	18	25	4
OB-fold nucleic acid binding domain	IPR004365	7	6	14	7	5	4	7	8	4	6	5	8	8	9	9	5	8	4	6	4	8	4	6	7
tRNA synthetases class II (D, K and N)	IPR004364	7	7	10	5	5	5	5	6	5	9	8	8	6	12	6	6	7	5	4	6	6	7	6	6
Heavy-metal-associated domain Heavy-metal-associated domain	IPR006121	12	10	12	6	6	6	7	9	7	8	14	2	3	3	8	4	5	5	6	9	1	6	3	3
3-OXO-5-ALPHA-STEROID 4-DEHYDROGENASE Protein of unknown function (DUF1295)	IPR010721	17	13	15	11	3	2	3	8	3	4	21	2	3	5	3	4	3	9	4	5	4	3	4	5
Tetratricopeptide repeat	IPR013105	7	10	18	11	6	3	9	12	2	9	3	4	3	23	4	4	2	7	4	2	1	6	5	4
UNCHARACTERIZED PROTEIN YQGE Uncharacterized ACR, COG1678	IPR003774	8	17	18	9	2	5	3	13	4	2	15	1	2	10	4	3	3	4	3	6	2	7	9	4
Ubiquitin-like protease family Ulp1 protease family, C-terminal catalytic domain	IPR003653	6	5	3	5	5	3	6	6	2	12	8	4	9	13	3	4	2	13	4	3	4	18	3	9
Sulfotransferase domain	IPR040632	17	25	27	18	8	0	6	4	2	0	7	0	0	2	2	0	0	3	5	8	5	6	7	6
Thioredoxin-like	IPR012336	16	15	5	8	6	3	5	12	2	8	12	3	1	11	3	9	0	1	3	8	0	4	5	10
Toprim domain Toprim domain	IPR006171	8	8	9	7	4	6	6	7	6	6	4	6	6	7	7	7	6	5	1	7	8	6	9	5
Peptidase family M41	IPR000642	13	10	6	5	7	7	6	6	9	7	6	6	4	6	10	4	9	5	7	4	5	3	5	5
Proteasome beta-type subunits	IPR016050	7	8	6	7	8	6	6	6	5	6	8	6	7	7	4	11	5	4	6	5	5	8	7	7
Zn(2)-C6 fungal-type DNA-binding domain Zn(2)-C6 fungal-type DNA-binding domain Fungal Zn(2)-Cys(6) binuclear cluster domain	IPR001138	7	12	7	8	0	0	0	4	0	0	14	3	0	84	0	4	0	8	0	1	0	1	4	0
SERINE/THREONINE-PROTEIN KINASE IAL-RELATED	IPR030616	6	11	5	5	3	7	43	9	6	11	5	3	5	4	2	6	3	4	2	2	3	2	1	9
Ribosomal protein L7Ae/L30e/S12e/Gadd45 family	IPR004038	7	7	2	4	6	4	4	5	6	6	7	8	10	10	6	7	6	6	7	7	6	6	6	9
SPRY domain	IPR003877	8	17	8	6	4	4	5	9	5	3	12	5	4	24	2	7	3	2	6	4	2	4	2	9
NHL repeat	IPR013017	22	32	11	22	0	0	1	22	2	5	21	0	1	9	2	1	0	1	1	0	0	0	1	4
Anticodon-binding domain of tRNA ligase	IPR013155	7	7	6	5	5	7	5	7	6	8	9	7	6	8	6	6	6	3	4	6	6	7	7	6
C-terminal, D2-small domain, of ClpB protein	IPR019489	5	8	6	4	6	6	7	5	6	8	11	6	2	4	7	7	7	3	6	6	5	6	8	10
Glycosyl hydrolases family 16 Glycosyl hydrolases family 16 (GH16) domain	IPR000757	5	11	13	4	9	9	4	6	1	3	12	0	8	0	0	4	1	4	6	7	0	8	5	33
Glycosyl hydrolases family 18 Glycosyl hydrolases family 18 (GH18) domain	IPR001223	19	20	8	14	6	4	8	1	2	3	13	0	1	1	1	2	1	2	3	2	0	15	21	5
Formin homology-2 (FH2) domain Formin Homology 2 Domain	IPR015425	7	11	8	8	13	5	3	10	4	6	12	4	5	7	4	3	2	8	6	5	5	6	6	4
Phospholipase/Carboxylesterase	IPR003140	16	16	8	10	9	3	1	17	1	4	10	1	5	14	2	3	2	6	5	3	1	6	6	4
NGEP-RELATED Calcium-activated chloride channel	IPR007632	9	13	14	1	9	0	0	21	0	19	10	2	3	13	0	1	0	12	8	3	2	3	3	7
GHMP kinases N terminal domain	IPR006204	7	10	12	2	7	6	6	7	5	6	14	7	5	7	6	5	6	5	5	6	2	4	5	4
Oxidoreductase FAD-binding domain	IPR008333	20	11	10	9	7	3	2	10	5	3	14	6	6	2	3	5	3	4	3	6	5	4	2	5
RING-type zinc-finger	IPR027370	12	9	8	5	0	2	4	8	2	10	7	2	2	4	4	6	1	7	2	3	1	30	3	18
Sulfite exporter TauE/SafE	IPR002781	14	13	12	10	3	3	2	8	4	5	11	5	2	5	3	5	4	5	6	5	5	4	8	7
VACUOLAR PROTEIN SORTING-ASSOCIATED PROTEIN VPS13	IPR026847	10	17	24	5	2	2	4	11	2	5	14	2	2	5	1	6	5	6	1	6	3	4	7	4
SPX domain SPX domain	IPR004331	5	12	11	4	4	3	5	9	8	5	11	4	2	7	4	3	2	10	4	6	5	8	7	8
Phosphoribosyl transferase domain	IPR000836	6	9	7	6	6	3	6	8	4	6	8	11	6	6	6	6	7	8	3	7	5	3	4	8
TRANSIENT RECEPTOR POTENTIAL ION CHANNEL PROTEIN	IPR024862	18	15	16	13	2	4	13	9	2	20	2	0	0	10	0	1	0	3	1	2	0	0	1	19
C-terminus of histone H2A	IPR032454	10	4	2	9	14	8	27	3	9	3	10	2	2	3	4	3	3	4	1	4	3	6	6	8
Carbon-nitrogen hydrolase domain Carbon-nitrogen hydrolase	IPR003010	6	11	8	4	10	6	6	7	6	6	12	8	4	4	4	5	3	4	5	7	3	7	3	7
GDP-fucose protein O-fucosyltransferase	IPR019378	15	22	20	17	4	3	5	10	2	1	6	1	3	2	0	2	0	2	5	6	3	8	8	1
3-oxo-5-alpha-steroid 4-dehydrogenase Steroid 5-alpha reductase C-terminal domain	IPR001104	11	7	10	5	3	5	5	6	5	6	15	5	5	6	5	3	4	11	3	5	4	3	4	8
Acyl-CoA dehydrogenase, N-terminal domain	IPR013786	8	7	8	8	10	5	3	9	4	13	11	7	1	6	4	6	4	3	4	6	3	3	6	5
B302/SPRY domain	IPR001870	8	16	7	7	5	4	6	8	5	3	8	7	3	19	3	7	3	3	7	3	2	3	2	9
Tetratricopeptide repeat	IPR001440	7	8	8	2	10	6	5	12	6	4	3	3	4	20	5	5	4	6	3	7	3	4	4	9
tRNA pseudouridine synthase	IPR020097	10	10	13	6	5	3	4	5	4	6	12	4	4	6	5	5	5	3	3	7	4	6	9	5
Cation transporting ATPase, C-terminus	IPR006068	4	4	5	2	8	7	10	5	4	15	7	2	5	10	5	11	5	1	5	8	4	4	8	6
Dynamin-type guanine nucleotide-binding (G) domain	IPR030381	6	7	11	8	15	6	6	11	5	9	11	1	3	5	4	4	2	5	5	5	2	7	5	4
Glycosyl transferase family 41	IPR029489	6	16	10	5	8	2	0	7	2	3	5	2	2	61	1	0	2	1	8	1	2	1	2	1
Glycosyl hydrolase family 3 N terminal domain	IPR001764	13	22	15	8	8	4	0	13	0	4	20	0	0	0	1	4	0	1	3	3	0	0	0	25
Hint module	IPR001767	1	2	3	1	2	1	0	17	0	20	15	5	38	4	0	0	0	4	0	0	30	2	0	1
N-terminal region of Chorein or VPS13	IPR026854	2	18	11	5	2	3	3	13	2	8	9	4	4	7	3	6	4	8	2	6	3	3	5	10
MAP kinase	IPR003527	13	10	11	9	6	3	6	14	3	12	6	3	4	3	4	7	3	6	3	2	4	1	2	10
Phosphatidylinositol phosphate kinase (PIPK) domain Phosphatidylinositol-4-phosphate 5-Kinase	IPR002498	7	20	21	6	5	3	3	11	3	5	12	1	1	6	4	5	3	12	4	3	1	1	3	2
Complex 1 protein (LYR family)	IPR008011	8	6	1	6	4	10	7	7	6	1	3	9	4	7	9	10	3	8	4	4	9	5	3	1
Complex I intermediate-associated protein 30 (CIA30)	IPR013857	16	12	8	12	1	3	5	10	3	3	9	4	3	3	5	3	4	5	2	6	4	7	5	2
Cytochrome C oxidase, cbb3-type, subunit III Cytochrome c Cytochrome c family	IPR009056	13	10	7	6	6	4	3	3	4	7	16	5	2	6	4	3	3	5	4	5	2	10	5	7
Cytoskeletal-regulatory complex EF hand EH domain	IPR000261	8	26	7	16	1	4	2	7	2	3	11	3	2	4	9	3	2	1	1	2	18	3	3	3
Serine hydrolase (FSH1)	IPR005645	17	12	13	10	5	2	3	9	3	4	26	1	1	4	3	1	3	2	4	4	2	3	4	2
Glycosyl hydrolase family 3 C-terminal domain	IPR002772	16	22	17	9	5	2	0	11	0	5	18	0	0	0	0	4	0	1	3	3	0	0	0	23
Glycogen recognition site of AMP-activated protein kinase	IPR032640	5	3	4	2	1	5	4	1	5	9	3	9	16	12	4	2	3	11	2	1	17	1	1	19
PHOSPHOGLYCERATE MUTASE 2,3-bisphosphoglycerate-dependent phosphoglycerate mutase [gpmA]	IPR005952	11	12	8	6	18	0	1	7	0	7	11	0	0	4	0	5	0	8	10	7	0	8	7	5
EGF domain	IPR024731	0	2	1	1	0	2	0	0	0	123	0	0	0	8	0	0	0	0	0	0	0	0	0	3
Zinc finger TRAF-type TRAF-type zinc finger	IPR001293	9	15	5	7	2	0	1	4	0	59	11	3	0	1	5	2	4	3	4	0	0	1	1	2
Endoplasmic reticulum vesicle transporter	IPR012936	9	11	14	7	8	3	3	7	3	1	10	2	3	4	4	5	5	4	4	5	5	5	6	4
PAP2 superfamily	IPR000326	11	10	7	9	2	9	4	8	7	3	8	6	6	6	3	3	2	5	5	3	6	4	3	3
Fructose-1-6-bisphosphatase, N-terminal domain	IPR033391	9	5	6	5	3	4	3	3	5	8	9	8	8	5	5	6	5	4	2	5	7	4	4	7
Coagulation factors 5/8 type C domain (FA58C) F5/8 type C domain	IPR000421	12	19	12	12	3	1	2	7	1	7	21	3	0	16	0	0	1	6	1	0	0	5	0	10
Dehydrogenase E1 component	IPR001017	10	9	6	5	4	5	4	6	7	5	11	5	2	6	4	5	4	3	3	11	3	4	6	4
DDE superfamily endonuclease	IPR027806	0	0	1	0	1	0	1	2	0	0	7	0	16	5	1	0	1	0	0	0	0	17	2	0
FRUCTOSE-1,6-BISPHOSPHATASE-RELATED Fructose-1,6-bisphosphatase class 1 [fbp]	IPR000146	9	5	6	5	4	4	3	3	4	8	10	7	7	5	5	6	5	5	2	5	6	4	4	7
Putative RNA methylase family UPF0020	IPR000241	11	10	13	7	3	2	2	9	2	10	9	1	2	4	3	5	2	5	5	5	5	5	3	10
CRYPTOCHROME	IPR002081	7	6	3	4	5	6	5	6	6	6	8	7	8	4	4	2	4	3	3	5	11	6	6	6
Brix domain Brix domain	IPR007109	5	6	6	4	4	4	5	6	5	6	11	5	4	6	5	5	5	9	5	5	5	5	5	5
Biotin carboxylation domain	IPR011764	6	7	9	6	7	6	3	11	6	4	6	5	6	3	3	5	3	5	3	6	7	4	7	3
LysM domain LysM domain	IPR018392	6	6	4	5	2	17	11	3	4	2	4	0	0	49	5	1	6	3	1	1	0	2	2	1
SAM-dependent methyltransferase TRMB-type domain tRNA (guanine-N(7)-)-methyltransferase [trmB] 3-DEOXY-D-MANNO-OCTULOSONIC-ACID TRANSFERASE/TRNA GUANINE-N 7 - -METHYLTRANSFERASE Putative methyltransferase	IPR003358	6	10	8	8	3	2	4	14	2	5	8	2	2	6	6	3	6	6	7	7	5	4	5	3
PsbP	IPR002683	7	8	2	5	0	11	10	5	11	3	4	1	3	4	15	4	14	4	3	4	4	2	4	5
PHOSPHATIDYLINOSITOL KINASE	IPR015433	9	8	10	3	9	2	3	6	3	6	10	2	3	9	2	6	2	4	8	5	4	5	6	4
BT1 family FOLATE-BIOPTERIN TRANSPORTER 1, CHLOROPLASTIC	IPR039309	9	11	8	8	7	1	2	10	3	12	5	0	2	8	3	8	4	4	4	3	1	4	4	14
Polyketide synthase dehydratase	IPR020807	2	8	5	4	0	1	2	7	11	31	29	0	0	0	6	4	0	0	2	0	0	0	0	24
GPCR proteolysis site, GPS, motif GPS domain	IPR000203	8	24	11	7	3	0	0	15	0	24	1	0	0	5	0	0	0	10	1	0	0	0	0	27
Glyoxalase/Bleomycin resistance protein/Dioxygenase superfamily	IPR004360	4	3	4	3	4	6	6	3	7	6	8	7	16	5	3	6	2	3	3	4	7	6	4	10
Ricin-type beta-trefoil lectin domain Ricin-type beta-trefoil lectin domain-like Lectin domain of ricin B chain	IPR000772	5	7	11	5	11	0	4	12	0	15	2	0	2	6	0	0	0	0	2	15	1	20	5	12
DYNAMIN	IPR022812	5	11	6	7	10	6	8	9	5	13	9	1	2	3	3	8	3	5	4	3	1	4	3	5
Sodium:solute symporter family Sodium:solute symporter family	IPR001734	11	6	7	6	5	1	7	4	8	8	14	1	4	10	2	2	3	11	5	5	1	4	2	6
tRNA-binding domain Putative tRNA binding domain	IPR002547	5	6	7	5	5	4	7	7	4	5	7	5	3	8	7	3	6	4	5	6	4	5	5	5
D-isomer specific 2-hydroxyacid dehydrogenase, catalytic domain	IPR006139	7	7	4	6	7	4	6	5	8	5	8	8	5	5	4	4	4	3	4	8	5	4	4	7
Peptidase family S41	IPR005151	6	7	9	5	4	3	5	7	5	4	9	4	4	10	4	4	4	2	3	5	5	5	5	8
Major intrinsic protein	IPR000425	10	7	3	8	4	9	3	8	7	3	11	5	4	11	0	9	1	3	4	5	4	1	2	9
GAF domain	IPR003018	13	16	20	8	2	3	4	8	2	6	3	0	2	13	2	0	0	2	3	6	0	2	8	7
Fructose-1-6-bisphosphatase, C-terminal domain	IPR044015	9	5	6	5	4	4	3	3	4	7	8	8	5	5	5	6	5	5	2	5	6	4	4	7
Endoplasmic Reticulum-Golgi Intermediate Compartment (ERGIC)	IPR039542	9	11	11	8	5	2	3	7	3	0	13	1	3	4	4	4	5	6	2	5	5	5	6	4
Trehalose-phosphatase	IPR003337	11	7	13	4	8	2	3	6	3	8	10	8	7	4	3	5	3	3	4	2	8	2	3	3
RWD domain RWD domain	IPR006575	5	12	10	6	2	6	3	5	2	7	11	2	2	6	8	4	2	5	4	3	3	5	5	10
HhH-GPD superfamily base excision DNA repair protein	IPR003265	6	8	3	6	5	6	4	9	6	6	10	5	4	3	6	5	4	6	2	4	3	3	5	8
TGS domain	IPR004095	5	5	9	2	6	5	6	3	7	5	7	8	5	7	6	5	7	2	2	4	7	4	5	6
Amino acid permease	IPR002293	4	8	7	7	1	7	6	12	16	6	7	5	1	6	0	9	1	4	1	3	0	3	6	8
ARYL HYDROCARBON RECEPTOR INTERACTING PROTEIN RELATED	IPR039663	11	13	16	10	2	2	2	10	1	6	12	3	1	7	2	0	3	6	4	1	1	3	1	14
FtsJ-like methyltransferase	IPR002877	5	6	8	5	6	5	6	7	4	8	4	3	2	10	5	5	4	4	3	5	3	6	6	9
SPHINGOMYELIN PHOSPHODIESTERASE RELATED	IPR038772	0	0	0	0	0	1	131	0	1	0	0	0	0	0	0	0	0	0	0	0	0	0	0	0
The ARF-like 2 binding protein BART	IPR023379	15	26	16	17	9	0	2	17	0	2	1	0	0	5	2	0	0	9	10	0	0	0	0	1
HEME-BINDING PROTEIN-RELATED SOUL heme-binding protein	IPR006917	6	8	7	3	1	7	8	8	8	4	10	1	3	7	4	5	3	7	3	5	2	5	6	6
SelR domain Methionine-R-sulfoxide reductase (MsrB) domain	IPR002579	13	13	7	7	11	1	4	13	2	4	12	1	2	6	2	2	2	2	3	3	10	1	2	2
NAD binding domain of 6-phosphogluconate dehydrogenase	IPR006115	9	11	8	8	8	2	6	8	4	6	8	4	3	3	3	7	3	1	3	5	4	5	4	5
IMPORTIN BETA	IPR040122	4	7	11	3	5	4	5	6	5	6	6	3	4	7	5	6	6	3	4	5	5	4	5	7
Retinal pigment epithelial membrane protein BETA-CAROTENE DIOXYGENASE	IPR004294	8	6	4	4	3	6	8	8	6	5	11	4	5	3	6	4	6	5	3	5	2	3	5	8
Adaptor complexes medium subunit family Mu homology domain (MHD)	IPR028565	7	6	8	6	6	4	4	6	4	5	4	5	5	5	5	4	5	2	3	8	3	4	7	6
SWIM zinc finger Zinc finger SWIM-type	IPR007527	7	6	8	5	8	3	6	5	3	2	5	3	1	5	1	1	1	19	7	12	3	13	0	4
PROTEIN PHOSPHATASE 2C	IPR039123	7	5	3	5	1	4	17	1	4	12	10	3	2	5	2	4	3	1	2	2	3	2	2	28
Tripartite DENN domain	IPR037516	7	14	14	4	1	1	2	12	1	2	5	1	2	4	2	6	4	6	6	7	3	6	9	4
Histone methylation protein DOT1	IPR025789	12	18	12	9	9	0	1	11	1	5	7	0	0	4	3	5	3	1	9	3	0	5	2	6
Scavenger receptor cysteine-rich domain SRCR domain	IPR001190	6	9	5	5	6	18	37	8	0	3	2	0	0	14	0	0	0	8	2	0	0	0	0	7
Haloacid dehalogenase-like hydrolase	IPR006357	11	8	4	7	4	4	4	9	2	5	16	3	3	3	2	4	2	4	4	5	4	4	6	6
VACUOLAR PROTEIN 8	IPR045156	9	19	14	9	10	0	1	25	0	2	5	0	0	16	2	1	1	9	3	0	0	1	1	1
RNase H domain Reverse transcriptase-like	IPR002156	2	4	11	4	0	3	13	10	0	8	21	2	3	0	2	2	1	6	2	3	2	3	9	8
Acyl transferase domain	IPR014043	6	6	8	4	4	2	1	5	9	27	10	1	1	1	2	6	2	1	3	1	0	1	1	26
PPPDE domain PPPDE putative peptidase domain DESUMOYLATING ISOPEPTIDASE	IPR008580	7	8	5	8	11	2	5	4	2	17	5	3	3	6	3	4	3	3	5	2	2	6	4	7
XPG I-region	IPR006086	9	5	4	6	4	4	2	7	4	5	8	3	3	3	4	6	5	9	4	5	3	6	6	8
5'->3' EXORIBONUCLEASE	IPR027073	8	8	9	6	3	4	4	6	2	6	14	4	4	3	3	3	3	9	3	6	4	4	2	4
DENN (AEX-3) domain	IPR001194	5	11	14	7	5	1	2	10	1	3	6	0	1	3	3	7	4	6	7	7	2	4	9	3
Small heat shock protein (sHSP) domain	IPR002068	2	5	6	3	0	3	7	3	6	5	6	3	7	14	4	6	4	2	0	7	8	12	6	7
MATH domain MATH/TRAF domain	IPR002083	3	8	4	3	3	4	6	4	4	6	9	2	4	7	4	2	3	3	2	1	1	35	1	6
Type III restriction enzyme, res subunit	IPR006935	9	10	7	4	5	2	0	9	3	8	15	2	5	5	6	1	4	13	2	3	3	2	3	3
Bacteriorhodopsin-like protein FAMILY NOT NAMED	IPR001425	16	14	2	7	0	1	6	1	1	26	0	0	0	41	1	1	0	2	0	0	0	0	0	8
HISTONE H2B	IPR000558	8	2	1	7	14	9	27	1	9	3	7	4	2	5	3	2	2	1	0	2	2	7	5	2
Acyl CoA binding protein Acyl-CoA-binding (ACB) domain	IPR000582	7	11	7	6	1	5	4	14	4	4	10	2	2	6	7	4	4	3	4	4	3	4	3	5
GNS1/SUR4 family FATTY ACID ACYL TRANSFERASE-RELATED	IPR002076	5	7	5	6	5	0	0	6	1	6	13	3	4	7	3	11	2	9	3	6	5	4	3	8
Ubiquitin-2 like Rad60 SUMO-like	IPR022617	8	9	9	6	7	3	6	7	2	4	14	2	3	4	1	3	1	11	3	3	3	4	4	6
Cysteine-rich secretory protein family	IPR014044	5	4	5	6	1	12	13	1	1	27	3	1	3	0	1	0	0	1	1	1	1	9	19	10
Macrocin-O-methyltransferase (TylF) MACROCIN O-METHYLTRANSFERASE	IPR008884	18	14	11	10	5	1	1	22	2	0	19	0	0	5	1	1	0	0	5	3	0	4	2	0
Leucine Rich repeats (2 copies)	IPR025875	16	16	2	9	3	4	6	4	3	4	9	2	1	14	1	2	0	5	3	1	0	2	2	10
AAA ATPase domain	IPR041664	1	1	9	3	4	1	1	8	1	2	2	0	0	4	4	1	0	4	3	12	1	25	35	0
UTP--glucose-1-phosphate uridylyltransferase	IPR002618	6	9	13	4	8	4	3	8	3	3	16	1	1	5	2	5	4	3	5	4	3	5	4	2
SOLUTE CARRIER FAMILY 25 (MITOCHONDRIAL CARRIER PHOSPHATE CARRIER), MEMBER 3, LIKE-RELATED-RELATED	IPR044677	10	8	9	6	6	1	1	5	1	4	9	2	3	5	2	4	2	5	5	8	2	6	7	3
Amino-transferase class IV	IPR001544	5	5	7	2	3	6	5	6	3	7	9	3	2	5	4	5	3	5	5	7	2	7	6	6
impB/mucB/samB family UmuC domain	IPR001126	4	8	7	4	4	5	5	7	5	7	14	4	4	4	3	4	4	4	4	4	2	3	3	7
GLUTATHIONE PEROXIDASE Glutathione peroxidase Glutathione peroxidase	IPR000889	6	8	3	5	5	6	5	12	3	5	9	1	3	4	6	4	6	5	3	3	3	8	3	6
Centromere kinetochore component CENP-T histone fold	IPR035425	9	0	0	7	10	4	33	2	6	2	8	2	2	5	4	2	2	7	1	2	2	2	6	3
Leucine carboxyl methyltransferase	IPR007213	8	8	10	8	3	7	6	6	4	5	12	2	3	5	3	4	3	3	2	3	3	5	2	4
PHOSPHOINOSITIDE-SPECIFIC PHOSPHOLIPASE C FAMILY PROTEIN	IPR001192	15	16	25	9	4	0	1	3	0	3	25	0	1	1	1	0	1	2	1	4	1	2	4	1
Glycosyl hydrolases family 31	IPR000322	8	14	14	5	4	6	2	10	8	6	8	6	6	3	4	3	4	1	0	1	1	1	2	6
VESICLE PROTEIN SORTING-ASSOCIATED Sec1 family	IPR001619	5	6	5	5	3	5	5	5	5	4	8	7	5	8	5	4	4	4	4	4	7	3	4	4
Cullin family	IPR001373	6	4	6	2	7	4	3	4	4	7	10	6	6	5	4	7	4	5	4	5	7	1	5	3
Glycosyltransferase family 20 TREHALOSE-6-PHOSPHATE SYNTHASE	IPR001830	9	8	11	7	7	2	3	6	2	5	10	7	4	4	2	4	2	6	3	2	6	4	3	3
FAD binding domain of DNA photolyase	IPR005101	7	6	3	4	5	4	4	6	5	6	8	4	5	4	4	2	4	1	3	5	9	6	6	6
Zinc finger ZZ-type Zinc finger, ZZ type	IPR000433	3	6	3	3	2	3	4	5	3	16	1	6	7	4	9	3	7	6	5	6	4	4	3	6
Polyprenyl synthetase	IPR000092	6	5	4	5	7	4	4	6	4	5	9	4	3	7	5	3	4	6	4	5	4	4	5	4
DYNEIN HEAVY CHAIN FAMILY PROTEIN	IPR026983	4	14	14	6	4	3	5	16	0	5	4	0	1	5	7	0	0	17	6	0	0	2	4	5
Transketolase, C-terminal domain	IPR033248	7	5	4	4	5	5	5	4	5	4	5	5	4	7	3	6	4	4	4	6	4	4	7	4
Cys/Met metabolism PLP-dependent enzyme TRANS-SULFURATION ENZYME FAMILY MEMBER	IPR000277	7	6	6	5	6	3	2	5	4	8	8	4	3	7	5	6	4	5	3	4	4	6	3	4
Protein of unknown function (DUF1336)	IPR009769	12	13	13	5	4	3	4	6	2	0	11	0	0	2	2	7	2	2	4	7	0	8	8	0
TFIIS N-terminal domain TFIIS helical bundle-like domain	IPR017923	10	7	6	15	6	4	5	11	4	4	4	2	1	3	4	6	3	2	5	3	1	5	5	3
Biotin carboxylase, N-terminal domain	IPR005481	6	6	6	6	7	6	3	7	5	4	5	5	5	3	2	5	3	4	3	6	7	2	7	3
START domain	IPR002913	6	8	8	4	4	1	1	6	4	11	9	2	1	7	5	8	3	2	2	4	1	2	2	20
MCM N-terminal domain	IPR027925	6	6	7	4	6	6	4	5	4	4	5	6	6	5	6	4	5	8	5	3	6	2	2	4
Peptidase family M20/M25/M40	IPR002933	5	5	5	2	6	6	10	3	10	7	4	6	11	4	3	5	2	2	3	3	6	1	3	4
PHOSPHATIDYLINOSITOL-4-PHOSPHATE 5-KINASE	IPR023610	5	17	17	6	5	3	2	9	2	3	12	1	1	7	3	4	3	8	4	2	1	1	2	1
Sushi repeat (SCR repeat) Sushi/CCP/SCR domain	IPR000436	0	0	0	0	0	0	0	0	0	83	0	0	0	12	0	0	0	0	0	0	0	0	0	26
Signal peptidase, peptidase S26	IPR019533	11	7	6	8	4	3	3	7	3	4	10	5	3	4	2	2	3	3	4	5	4	4	5	5
PWWP domain PWWP domain	IPR000313	2	12	9	7	2	1	4	13	6	2	6	1	4	6	8	3	5	2	1	3	18	2	0	0
Rad51	IPR013632	7	7	6	7	3	1	6	7	2	6	4	4	4	3	7	4	6	8	3	4	3	2	2	9
Nucleoside diphosphate kinase	IPR034907	8	11	6	9	5	3	4	8	2	3	6	2	4	7	4	3	3	8	2	3	3	5	4	4
Calcium-dependent channel, 7TM region, putative phosphate	IPR003864	10	8	6	5	6	4	10	2	4	2	5	2	5	2	7	5	3	1	5	7	4	3	4	1
UNCHARACTERIZED	IPR015414	10	13	5	8	1	2	2	6	3	6	12	4	1	6	1	5	1	4	2	3	2	5	4	7
SAM-dependent methyltransferase RNA m(5)U-type domain RNA M5U METHYLTRANSFERASE tRNA (Uracil-5-)-methyltransferase	IPR010280	6	7	7	8	4	3	3	8	2	4	11	3	3	4	5	4	6	2	5	5	3	3	5	3
Kringle domain Kringle domain	IPR000001	11	20	18	14	4	0	1	6	0	0	14	0	0	2	1	0	3	17	0	0	0	5	3	1
Glycosyl hydrolase family 47	IPR001382	4	8	8	6	8	4	1	6	6	2	11	1	4	5	3	4	2	6	5	2	3	2	4	11
Biotin carboxylase C-terminal domain	IPR005482	6	7	6	5	7	6	3	10	5	4	1	5	4	3	3	4	3	1	3	6	7	4	7	3
Sigma-70 region 2	IPR007627	10	10	4	7	6	4	2	8	3	3	3	5	6	0	2	5	1	6	1	8	8	3	7	1
Cathepsin propeptide inhibitor domain (I29)	IPR013201	2	11	8	3	15	8	2	10	5	11	4	0	0	3	4	6	1	3	2	3	0	4	6	2
GDSL/SGNH-like Acyl-Esterase family found in Pmr5 and Cas1p	IPR026057	25	15	12	19	0	1	0	12	8	0	14	0	0	0	0	1	0	2	3	1	0	4	1	0
MINA53 MYC INDUCED NUCLEAR ANTIGEN	IPR039994	6	13	10	9	9	2	1	11	2	3	5	1	2	5	2	3	2	5	5	4	3	4	5	3
CDP-alcohol phosphatidyltransferase	IPR000462	3	3	3	4	3	5	5	4	4	6	6	6	4	6	4	6	5	3	3	5	6	6	7	6
ATP-BINDING CASSETTE TRANSPORTER SUBFAMILY A ABCA	IPR026082	5	5	10	6	14	6	5	8	3	8	8	3	2	7	3	2	1	8	4	4	0	2	2	2
DNA polymerase family B	IPR006134	5	6	8	2	6	5	4	7	5	4	6	5	6	6	4	4	3	4	2	4	4	6	4	5
Dynein heavy chain, N-terminal region 1	IPR013594	5	10	6	4	7	3	4	14	4	7	0	0	1	17	6	3	2	7	6	1	0	1	3	6
XPG N-terminal domain	IPR006085	3	6	4	7	6	5	4	8	4	4	9	3	3	4	4	6	4	7	2	4	3	3	3	8
PYRUVATE KINASE	IPR001697	8	4	3	5	6	7	8	7	5	2	6	4	3	4	8	5	2	2	3	7	3	3	5	2
Serine carboxypeptidase S28	IPR008758	10	14	12	7	7	3	2	8	2	3	14	0	0	3	2	2	1	6	3	4	0	3	2	4
HEAT SHOCK PROTEIN 90 FAMILY MEMBER Chaperone protein HtpG [htpG] Hsp90 protein	IPR001404	6	5	5	4	6	5	3	6	3	6	6	3	3	6	4	4	4	9	3	4	5	5	5	4
Alpha galactosidase A ALPHA-GALACTOSIDASE/ALPHA-N-ACETYLGALACTOSAMINIDASE	IPR002241	12	20	18	10	6	4	1	13	5	4	13	1	0	2	0	1	0	2	2	0	0	0	0	3
Cytidylyltransferase-like	IPR004821	8	10	9	5	4	4	2	8	4	4	6	3	4	3	3	2	2	3	3	8	3	1	5	7
Got1/Sft2-like family	IPR007305	9	10	8	5	7	3	3	7	3	3	10	2	2	3	3	5	3	4	5	6	3	3	3	3
Regulated-SNARE-like domain Longin domain	IPR010908	4	5	6	6	6	3	7	3	5	4	5	4	4	6	3	6	3	4	5	5	3	5	4	5
His Kinase A (phospho-acceptor) domain	IPR003661	3	4	4	0	2	2	7	3	3	14	1	0	0	12	6	2	1	29	1	8	0	1	1	5
XRN 5'-3' exonuclease N-terminus	IPR004859	7	8	8	7	2	4	4	6	2	6	12	3	4	3	3	3	3	7	3	5	4	3	2	4
Elongation factor Tu C-terminal domain	IPR004160	3	4	4	3	4	5	5	4	5	5	5	5	5	9	6	5	7	3	3	5	5	2	6	4
Glycolipid transfer protein (GLTP)	IPR014830	18	15	9	11	2	2	2	10	1	1	17	2	3	1	0	0	1	0	2	3	7	2	5	1
RF-1 domain	IPR000352	4	6	6	5	5	3	3	4	3	6	4	5	4	5	5	5	4	5	4	5	4	6	4	8
Alpha amylase, catalytic domain	IPR006047	0	0	2	0	0	12	9	1	9	9	1	9	6	5	14	0	8	1	0	0	8	0	0	22
FATC domain FATC domain	IPR003152	4	9	8	8	5	3	5	7	6	3	6	4	2	4	6	5	4	5	2	3	3	3	3	5
PA domain	IPR003137	8	5	5	1	4	4	4	1	5	4	5	1	1	19	6	6	3	2	6	4	2	5	4	6
ATP synthase alpha/beta family, nucleotide-binding domain	IPR000194	5	4	4	3	4	4	5	6	4	5	5	7	4	6	5	4	4	5	3	4	4	4	6	4
UDP-N-ACETYLGLUCOSAMINE--PEPTIDE N-ACETYLGLUCOSAMINYLTRANSFERASE 110 KDA SUBUNIT	IPR037919	5	14	8	8	6	1	0	10	1	1	4	1	1	46	0	1	0	0	5	1	0	1	1	0
Threonyl and Alanyl tRNA synthetase second additional domain	IPR012947	7	6	7	6	4	2	5	6	4	4	11	3	4	5	4	5	4	1	3	5	6	3	4	3
Acyltransferase family	IPR002656	4	12	14	4	12	2	0	4	3	16	10	0	1	1	3	4	1	1	2	1	11	1	1	7
Pyruvate kinase, barrel domain	IPR015793	8	5	3	5	6	5	7	7	5	2	6	4	3	4	8	5	2	2	3	7	3	3	5	2
Poly(ADP-ribose) polymerase and DNA-Ligase Zn-finger region Poly(ADP-ribose) polymerase zinc finger domain	IPR001510	9	15	8	9	6	5	2	12	1	6	9	0	0	2	3	0	0	4	13	0	3	1	2	3
DUF614 FAMILY PROTEIN-RELATED PLAC8 family	IPR006461	5	9	4	7	3	1	10	3	2	5	8	0	0	6	5	3	0	1	0	8	0	10	5	16
AhpC/TSA family	IPR000866	5	3	1	3	4	6	7	4	9	6	5	5	7	6	3	4	4	4	7	5	3	0	4	6
Cullin family	IPR016158	6	3	6	1	6	4	3	4	4	6	9	6	6	5	4	8	4	3	3	4	7	1	5	3
Aldose 1-epimerase	IPR008183	9	7	9	6	4	7	4	5	5	3	6	2	3	4	5	3	5	4	4	3	4	4	3	3
FLAP ENDONUCLEASE FAMILY MEMBER	IPR006084	4	6	5	6	5	4	2	7	3	5	10	2	2	3	3	5	4	7	3	4	2	6	5	8
23S RRNA METHYLTRANSFERASE	IPR040072	7	8	7	4	5	3	5	7	3	6	10	0	1	3	4	4	4	6	5	4	2	3	4	5
Zinc finger CXXC-type CXXC zinc finger domain	IPR002857	10	16	9	16	3	0	0	17	0	0	21	0	0	0	0	0	0	7	2	2	0	6	4	0
Amidase	IPR023631	3	12	5	3	4	7	5	4	9	7	12	3	4	4	4	5	3	2	2	4	1	3	1	3
Gelsolin repeat	IPR007123	8	9	10	3	4	2	3	10	2	4	11	3	2	5	4	5	3	5	3	5	3	2	3	2
Proteasomal ATPase OB C-terminal domain	IPR032501	5	5	2	5	3	4	4	5	5	5	6	5	5	5	5	5	5	4	4	4	5	4	5	4
MAPEG family	IPR001129	6	9	9	8	5	2	2	6	4	12	9	1	4	4	2	5	1	3	2	3	2	3	5	6
Alpha-type protein kinase domain Alpha-kinase family	IPR004166	2	7	6	5	3	1	4	11	0	10	6	1	2	23	1	0	0	4	2	2	3	7	5	4
ABM domain Antibiotic biosynthesis monooxygenase	IPR007138	11	10	6	10	4	1	4	7	3	3	7	0	1	4	4	2	2	8	5	4	2	3	3	5
Core-2/I-Branching enzyme	IPR003406	4	11	10	8	0	10	0	7	11	1	3	6	10	3	1	4	0	3	2	3	3	2	2	6
Receptor family ligand binding region	IPR001828	9	15	2	18	5	0	0	1	0	18	22	0	0	7	0	0	0	0	0	0	2	1	0	12
Uncharacterized conserved protein (DUF2358) RIKEN CDNA 2310061I04 GENE	IPR018790	7	7	4	5	2	7	6	4	6	5	5	1	3	7	4	2	3	3	3	7	4	5	3	5
GHMP kinases C terminal	IPR013750	7	9	9	1	3	4	4	5	4	5	12	3	2	4	3	4	3	2	3	6	1	4	5	3
PROTEIN DISULFIDE-ISOMERASE A6	IPR044569	10	12	9	9	4	2	3	7	2	4	7	3	2	10	6	2	2	3	2	1	2	2	3	2
REJ domain	IPR002859	3	7	11	5	19	1	1	5	0	5	0	0	4	15	11	0	0	12	4	0	2	0	0	7
MIF4G domain	IPR003890	6	6	8	4	3	3	3	3	6	4	2	4	4	5	5	5	6	3	2	5	3	4	4	9
SEC7 domain Sec7 domain	IPR000904	5	7	7	5	3	2	3	5	4	4	9	2	5	7	3	3	3	4	2	5	4	6	4	5
STAS domain STAS domain	IPR002645	5	10	11	3	4	6	3	6	4	2	8	2	0	2	2	5	1	2	4	5	0	8	6	7
2-oxoacid dehydrogenases acyltransferase (catalytic domain)	IPR001078	4	5	5	3	4	4	6	4	5	3	5	6	5	5	4	5	4	3	4	6	7	2	5	3
emp24/gp25L/p24 family/GOLD GOLD domain	IPR009038	4	4	4	3	5	2	3	3	0	4	4	5	10	5	2	5	3	2	2	7	10	6	6	5
Zinc finger RanBP2 type	IPR001876	11	13	2	8	5	2	0	7	2	9	9	1	0	1	6	4	0	4	6	2	0	6	8	2
HIT domain	IPR011146	6	7	5	5	4	4	3	6	4	5	7	2	3	7	3	5	2	3	5	4	3	4	4	5
R3H domain R3H domain	IPR001374	6	9	8	6	4	5	2	7	3	4	8	8	6	5	4	3	2	1	4	4	3	3	1	2
HD domain HD domain	IPR006674	3	8	7	2	6	3	2	8	4	6	9	4	4	4	2	5	3	3	4	3	4	5	6	3
Zinc finger UBP-type Zn-finger in ubiquitin-hydrolases and other protein	IPR001607	4	4	5	4	5	3	2	4	4	5	6	5	5	4	3	6	4	2	4	6	5	4	5	5
Agenet domain	IPR008395	12	19	13	10	1	1	1	22	2	0	17	0	0	3	2	0	0	6	1	0	0	0	0	0
DNA REPAIR DEAD HELICASE RAD3/XP-D SUBFAMILY MEMBER	IPR045028	5	4	9	3	3	5	3	3	4	5	3	5	7	4	6	3	5	5	4	3	4	4	4	5
ATP-dependent zinc metalloprotease FtsH [ftsH]	IPR005936	12	7	3	3	5	2	4	4	5	3	4	6	3	6	5	3	5	1	5	4	5	1	4	5
NAD:arginine ADP-ribosyltransferase	IPR000768	5	28	11	3	0	0	0	29	0	2	18	0	1	12	0	0	0	0	0	0	0	0	0	1
Eukaryotic cytochrome b561 Cytochrome b561 domain	IPR006593	6	6	5	1	4	4	9	7	4	7	9	2	3	4	5	3	2	5	3	4	2	2	5	3
RecA family 1	IPR020588	5	6	5	5	2	3	6	6	3	4	2	6	3	2	8	4	8	6	2	5	2	2	3	8
Tim10/DDP family zinc finger	IPR004217	4	5	4	5	2	4	4	3	5	4	7	4	5	5	4	5	4	5	4	4	6	3	4	5
Polyketide cyclase / dehydrase and lipid transport	IPR005031	6	7	9	5	1	5	4	5	5	4	6	4	3	3	3	5	5	4	1	4	4	3	6	3
Protein of unknown function (DUF3431)	IPR021838	14	27	5	20	0	1	1	11	2	2	14	0	0	5	0	0	0	0	1	0	0	4	0	2
La domain La-type HTH domain	IPR006630	7	11	9	4	3	1	3	8	2	5	6	3	2	5	3	4	3	6	6	4	4	3	2	3
JITTERBUG, ISOFORM N	IPR044801	3	11	13	8	1	0	0	54	0	0	2	0	0	8	2	0	0	3	1	0	0	1	1	1
CGI-12 PROTEIN-RELATED mTERF	IPR003690	5	7	9	4	1	5	11	4	2	1	7	0	2	6	6	4	3	0	5	5	6	6	5	2
UVRD / RECB / PCRA DNA HELICASE FAMILY MEMBER	IPR000212	2	12	10	5	3	2	5	9	0	5	14	1	1	3	3	2	2	9	5	1	1	5	2	2
Cyclin	IPR013922	8	7	12	5	2	1	1	5	1	4	2	1	11	12	0	3	0	3	1	1	14	1	2	9
CYCLIN	IPR043198	5	4	4	5	2	5	6	4	4	2	8	3	4	6	4	7	4	4	1	4	4	5	4	4
galactosyl transferase GMA12/MNN10 family	IPR008630	10	16	11	12	0	0	2	10	3	8	3	2	3	1	2	2	1	1	2	4	1	0	2	12
Phosphatidylinositol-specific phospholipase C, X domain	IPR000909	12	16	21	8	4	0	1	2	0	2	19	0	3	0	1	0	2	2	1	4	1	2	3	1
Mechanosensitive ion channel	IPR006685	1	3	1	3	2	9	8	2	7	11	5	2	1	2	6	3	3	4	1	9	6	2	6	5
SODIUM/POTASSIUM/CALCIUM EXCHANGER	IPR004481	8	11	17	6	16	0	0	6	0	0	9	0	1	2	3	0	2	10	6	2	0	2	4	1
RNB domain	IPR001900	5	6	5	2	1	4	3	4	4	5	6	4	4	4	4	3	4	4	2	5	9	4	4	6
Cyclin M transmembrane N-terminal domain CNNM transmembrane domain	IPR002550	5	6	7	5	7	2	5	5	4	4	6	5	3	4	2	6	2	3	4	4	5	2	4	4
CULLIN	IPR045093	4	3	5	3	7	3	3	3	3	5	10	5	5	4	3	8	3	5	4	4	6	0	4	3
CAP-Gly domain CAP-Gly domain	IPR000938	5	6	6	4	7	2	2	20	1	4	6	2	2	6	3	4	1	2	4	3	2	3	3	4
4Fe-4S dicluster domain 4Fe-4S ferredoxin-type iron-sulfur binding domain	IPR017896	4	3	3	4	5	8	6	4	4	8	3	5	1	6	3	6	4	3	3	2	4	2	5	4
ANION EXCHANGE PROTEIN	IPR003020	7	6	8	4	3	1	1	2	1	12	11	2	2	2	4	2	2	7	1	8	2	5	3	4
Glycosyl transferase 4-like domain Glycosyltransferase Family 4	IPR028098	4	5	10	3	4	2	5	5	4	5	5	3	2	6	4	5	4	4	5	3	6	1	2	3
Elongation Factor G, domain III	IPR041095	4	3	4	1	4	2	2	4	3	6	5	6	4	4	4	6	5	3	5	5	4	5	5	6
Beige/BEACH domain BEACH domain	IPR000409	3	8	10	1	5	3	2	11	4	1	5	2	1	7	4	7	3	5	2	4	2	4	5	1
Gametolysin peptidase M11	IPR008752	0	0	0	0	0	17	39	0	0	0	3	0	0	0	0	0	0	3	0	6	0	6	1	0
FAMILY NOT NAMED AhpC/TSA antioxidant enzyme	IPR032801	8	8	3	6	3	4	5	8	3	2	4	1	1	1	4	3	4	5	3	7	4	3	5	3
HCO3- transporter family	IPR011531	6	6	8	4	3	1	1	2	1	12	12	2	2	2	4	2	2	6	1	8	2	6	3	4
C-CAP/cofactor C-like domain	IPR017901	3	8	9	5	3	3	4	9	2	4	4	3	3	6	4	3	3	4	4	4	4	3	2	4
ATP synthase alpha/beta family, beta-barrel domain	IPR004100	5	4	2	3	4	3	4	4	3	4	5	7	4	5	4	3	3	5	3	4	4	4	6	4
Domain of unknown function (DUF4336) YALI0C07656P	IPR025638	7	7	5	3	2	3	1	6	3	5	9	0	1	4	6	3	5	5	2	3	1	4	4	7
Glycosyl hydrolases family 2, TIM barrel domain	IPR006103	11	16	20	9	4	1	1	6	2	1	15	0	0	3	1	1	1	1	1	2	0	1	1	2
Phosphatidylinositol-specific phospholipase Y-box domain Phosphatidylinositol-specific phospholipase C, Y domain	IPR001711	14	16	14	9	3	0	1	2	0	3	19	0	1	0	1	0	1	2	1	4	2	2	3	1
AAA lid domain	IPR041546	3	5	3	2	3	5	4	3	4	6	3	4	2	4	5	4	4	3	3	4	3	5	6	8
tRNA synthetases class I (W and Y)	IPR002305	4	5	3	4	5	3	4	4	6	4	5	4	4	6	4	4	4	4	3	4	4	2	4	5
Diacylglycerol kinase catalytic domain DAG-kinase catalytic (DAGKc) domain	IPR001206	5	6	6	5	4	4	4	5	4	5	5	3	3	7	6	3	4	3	3	3	5	0	4	4
MRH domain	IPR044865	6	7	12	4	6	2	3	7	3	3	6	2	2	9	4	3	2	1	4	2	2	5	2	4
GMC oxidoreductase	IPR007867	5	4	5	1	7	2	1	5	3	6	7	1	7	3	0	8	0	4	3	5	2	2	2	17
UvrD-like DNA helicase ATP-binding domain UvrD/REP helicase N-terminal domain	IPR014016	2	8	9	7	5	2	4	8	0	4	11	1	1	6	2	2	1	5	6	1	1	9	2	3
Saccharopine dehydrogenase NADP binding domain	IPR005097	8	8	6	7	5	3	2	10	2	4	7	1	1	3	3	4	3	4	5	4	2	1	2	4
OXA1 60Kd inner membrane protein	IPR001708	2	5	5	2	3	4	5	4	4	4	6	6	3	5	4	4	4	6	3	4	4	3	4	3
ATP-dependent Clp protease proteolytic subunit [clpP]	IPR001907	5	4	3	5	4	4	3	5	5	4	7	6	6	2	4	3	3	3	4	4	3	3	4	3
eIF4-gamma/eIF5/eIF2-epsilon W2 domain	IPR003307	7	11	6	7	1	2	3	7	4	3	5	3	6	2	4	3	3	3	2	3	4	4	3	3
FGGY family of carbohydrate kinases, C-terminal domain	IPR018485	6	4	4	4	5	4	4	4	2	4	4	4	3	4	5	5	3	2	3	5	4	3	4	6
Vacuolar sorting-associated protein 13, N-terminal	IPR031646	1	13	12	3	1	1	1	10	3	5	7	2	3	4	1	3	4	4	1	4	2	2	4	7
GMC oxidoreductase	IPR000172	6	5	6	2	5	2	1	5	3	7	10	2	7	3	0	8	0	1	3	5	2	2	2	12
Protein of unknown function (DUF1499)	IPR010865	10	8	1	7	0	2	3	7	1	4	7	0	3	3	3	1	2	8	2	4	6	5	2	5
Phosphoglucomutase/phosphomannomutase, alpha/beta/alpha domain I	IPR005844	4	5	6	4	3	4	4	3	5	6	5	4	4	4	3	4	3	3	1	5	5	3	5	3
Dynein light chain type 1 DYNEIN LIGHT CHAIN	IPR001372	10	6	2	7	8	2	3	5	3	6	3	1	1	5	3	2	1	5	5	2	1	4	5	9
DNA polymerase family B, exonuclease domain	IPR006133	2	4	4	1	3	6	4	4	5	4	4	6	8	4	4	3	3	9	2	3	4	2	3	5
Haemolysin-III related ADIPOR/PROGESTIN RECEPTOR-RELATED	IPR004254	9	6	8	3	2	3	4	7	3	3	8	4	2	5	1	5	1	7	3	2	6	1	3	3
Oxidoreductase family, C-terminal alpha/beta domain	IPR004104	14	7	5	6	3	0	1	1	1	3	4	8	8	2	0	6	0	3	2	3	7	1	7	3
PHYTOL KINASE 1, CHLOROPLASTIC	IPR039606	1	3	3	2	0	1	69	2	2	0	2	1	2	1	1	2	1	2	0	1	1	0	1	0
Ribosomal proteins 50S-L15, 50S-L18e, 60S-L27A Ribosomal protein 60S L18 and 50S L18e	IPR021131	4	3	3	3	4	4	4	4	4	4	5	6	4	4	4	4	5	5	3	4	5	2	4	4
PQ loop repeat	IPR006603	5	5	4	7	4	7	4	8	2	4	10	2	4	3	3	3	2	4	2	1	3	2	4	4
Helicase C-terminal domain	IPR006555	5	3	6	2	3	4	3	3	4	5	3	5	6	4	5	3	5	4	4	3	4	3	4	5
BSD domain BSD domain	IPR005607	9	8	7	6	0	3	3	7	3	5	7	4	2	4	2	3	2	4	0	3	3	2	3	7
NOTUM-RELATED Pectinacetylesterase	IPR004963	12	17	13	10	6	0	0	12	1	5	8	0	0	5	0	2	1	2	1	0	0	2	1	1
HIGH-AFFINITY NITRATE TRANSPORTER 23	IPR044772	8	5	4	8	3	2	5	1	1	7	10	1	1	1	1	2	1	8	1	6	4	9	3	3
tRNA synthetases class I (E and Q), catalytic domain	IPR020058	3	4	7	4	6	3	3	4	3	4	6	3	3	6	3	3	3	4	5	4	3	5	4	3
Inosine-uridine preferring nucleoside hydrolase	IPR001910	19	13	5	7	1	2	4	2	2	5	8	1	0	2	2	1	2	9	2	0	1	5	2	3
ATP synthase subunit C	IPR002379	5	6	1	5	2	2	4	5	2	4	8	2	2	5	2	1	3	5	1	10	3	3	8	3
VPS9 domain Vacuolar sorting protein 9 (VPS9) domain	IPR003123	6	16	10	5	5	1	1	11	2	3	3	0	0	5	1	3	2	4	6	3	0	1	3	5
Der1-like family	IPR007599	4	6	6	5	4	2	2	6	3	5	5	2	2	3	2	4	3	5	5	4	2	5	5	4
MutS domain III	IPR007696	2	6	2	3	2	4	2	4	6	3	4	8	6	5	7	6	4	2	3	4	6	2	2	4
Pyruvate kinase, alpha/beta domain	IPR015795	7	3	1	4	5	6	5	4	5	2	2	4	3	4	8	5	2	1	2	7	3	3	5	2
Cytosolic domain of 10TM putative phosphate transporter	IPR027815	6	5	12	2	2	2	7	2	4	1	2	2	4	1	6	8	5	1	2	6	3	6	4	3
Glycosyltransferase family 92	IPR008166	0	4	7	2	2	7	7	1	6	1	0	1	1	7	0	5	0	2	4	5	14	8	6	4
AAA domain (dynein-related subfamily)	IPR011704	2	8	9	3	10	3	4	9	3	3	7	1	1	3	2	2	2	3	5	3	1	3	4	5
Exportin 1-like protein	IPR013598	6	5	4	3	3	4	3	2	4	4	3	2	4	6	3	6	3	5	4	3	3	3	3	8
SMC proteins Flexible Hinge Domain	IPR010935	5	4	9	2	3	4	3	6	4	4	3	5	4	3	4	3	4	3	2	4	4	4	3	7
Dienelactone hydrolase family	IPR002925	5	10	6	3	1	1	5	6	3	5	12	3	0	2	3	2	1	4	4	3	1	7	2	5
Maintenance of mitochondrial structure and function	IPR024969	4	3	3	4	4	4	5	4	4	4	5	4	4	4	4	4	4	3	4	4	4	3	4	4
LNR domain	IPR000800	9	10	23	11	1	0	0	6	0	6	13	0	0	0	0	1	0	3	1	0	0	0	0	14
LDOC1 RELATED	IPR032567	0	0	0	0	0	0	0	0	0	37	0	0	1	0	0	0	0	0	0	0	60	0	0	0
NAD-dependent glycerol-3-phosphate dehydrogenase N-terminus	IPR011128	10	5	3	6	2	3	5	3	3	3	9	4	3	4	1	3	2	5	2	3	4	3	3	4
Tub family	IPR000007	10	10	10	9	3	2	4	7	2	2	5	0	0	3	1	2	1	8	7	3	0	2	2	3
Adenosine/AMP deaminase	IPR001365	4	12	5	3	2	4	3	7	3	3	11	1	3	2	2	2	2	2	1	3	2	3	3	11
Elongation factor G, domain IV	IPR005517	5	4	3	2	4	2	2	4	4	5	4	5	5	4	4	5	4	4	4	4	4	4	3	5
UDP- GLUCOSE PYROPHOSPHORYLASE	IPR039741	6	6	7	2	7	3	4	8	3	5	11	0	0	4	3	3	4	3	4	3	1	3	3	2
Neurotransmitter-gated ion-channel ligand binding domain	IPR006202	18	17	5	13	14	0	3	1	0	2	18	0	0	0	0	0	0	1	0	0	2	2	0	0
Membrane transport protein	IPR004776	3	8	10	4	2	4	6	6	4	2	11	1	4	1	2	5	1	6	3	2	2	0	3	7
Nucleotidyltransferase domain	IPR002934	4	8	7	8	2	2	3	7	1	5	6	1	4	6	5	2	4	2	2	5	3	1	3	4
Sec23/Sec24 trunk domain	IPR006896	6	5	6	4	2	4	4	5	5	4	5	4	4	4	6	3	5	2	2	4	4	1	2	3
Histidine phosphatase superfamily (branch 2)	IPR000560	6	6	4	2	1	2	1	5	1	4	7	2	3	4	2	6	2	4	4	5	5	2	4	12
RGS domain Regulator of G protein signaling domain	IPR016137	13	7	24	3	12	0	0	11	0	0	3	0	0	0	0	2	0	5	10	1	0	2	2	1
RNA SPLICING PROTEIN MRS2, MITOCHONDRIAL	IPR039204	6	5	4	1	1	6	7	6	7	5	3	4	3	6	4	3	3	5	1	3	3	2	1	6
BolA-like protein	IPR002634	7	4	5	7	2	4	5	6	2	4	5	2	3	5	4	5	3	4	2	4	3	1	3	3
Flavin-binding monooxygenase-like	IPR020946	7	3	3	3	8	2	10	1	4	4	12	1	4	3	2	1	2	3	1	1	1	5	2	9
Carboxyl transferase domain	IPR034733	8	4	5	4	6	3	2	5	3	4	5	5	1	3	2	5	2	4	0	5	6	3	4	3
AP endonucleases family 1 AP ENDONUCLEASE	IPR004808	4	5	6	6	3	3	6	6	3	3	7	3	4	5	3	4	4	3	2	2	2	1	2	5
Superfamilies 1 and 2 helicase ATP-binding type-2 domain	IPR014013	1	3	6	2	3	4	1	3	4	5	3	5	6	4	5	3	5	4	4	3	4	4	4	6
NAD-binding of NADP-dependent 3-hydroxyisobutyrate dehydrogenase	IPR029154	7	7	6	5	7	2	4	6	3	6	7	2	2	3	2	6	2	1	1	3	2	3	3	4
Peptidase dimerisation domain	IPR011650	5	5	4	2	6	3	7	2	8	5	1	5	6	4	1	5	2	2	2	3	5	1	3	4
Guanylate-binding protein, N-terminal domain	IPR015894	3	6	8	2	8	2	5	7	2	5	12	0	0	10	3	4	0	4	6	1	0	2	1	4
Methyl-CpG-binding domain (MBD) Methyl-CpG binding domain	IPR001739	10	11	8	5	9	2	2	8	1	0	13	0	1	0	5	0	2	0	1	1	0	5	8	0
Glyceraldehyde 3-phosphate dehydrogenase, C-terminal domain	IPR020829	5	4	1	6	3	4	3	5	3	3	5	2	2	5	5	4	3	4	1	6	2	4	5	3
GYF domain 2	IPR025640	8	19	15	12	2	3	2	10	3	1	7	1	0	1	3	1	1	1	4	0	0	0	0	1
MA3 domain MI domain	IPR003891	3	4	5	3	3	4	3	4	5	3	4	3	4	4	6	5	4	2	1	5	3	4	4	4
Transcription factor S-II (TFIIS) Zinc finger TFIIS-type Zinc finger TFIIS-type	IPR001222	4	4	4	4	4	4	4	3	3	5	5	3	4	4	3	4	4	4	2	4	4	3	4	4
Vacuolar-sorting-associated 13 protein C-terminal	IPR031645	8	11	12	5	2	2	1	7	2	3	9	3	2	2	0	5	0	4	1	2	2	2	4	2
Prefoldin subunit	IPR002777	4	4	4	4	3	3	4	2	2	4	6	3	5	5	4	4	4	4	2	4	4	5	3	4
FAD binding domain	IPR003097	3	3	5	2	2	4	4	3	3	7	5	3	4	6	3	4	5	2	3	4	3	3	5	6
ATP dependent DNA ligase domain ATP-dependent DNA ligase family	IPR012310	3	6	10	1	2	7	3	6	3	4	13	3	2	4	2	3	2	3	1	4	3	1	1	4
Fibronectin type III-like domain	IPR026891	15	17	13	6	5	0	0	9	0	3	14	0	0	0	0	2	0	1	2	3	0	0	0	2
EngB-type guanine nucleotide-binding (G) domain	IPR030393	6	6	9	6	2	1	2	5	1	6	6	2	1	4	3	4	3	2	3	4	3	3	3	4
Glycerol-3-phosphate dehydrogenase [NAD(P)+] [gpsA] GLYCEROL-3-PHOSPHATE DEHYDROGENASE	IPR006168	9	4	3	5	2	3	5	3	4	3	9	4	2	4	1	3	2	5	2	3	4	3	3	3
COMPLEX I INTERMEDIATE-ASSOCIATED PROTEIN 30	IPR039131	12	7	3	7	0	2	2	4	1	2	6	2	2	3	4	2	3	4	2	5	3	6	5	1
HMGL-like Pyruvate carboxyltransferase domain	IPR000891	3	4	5	2	6	3	3	4	3	5	5	3	4	4	3	4	2	1	3	5	4	3	5	4
Polyamine biosynthesis (PABS) domain	IPR030374	4	3	1	3	5	1	2	3	2	2	2	3	3	2	2	1	2	4	2	7	2	11	10	2
Syntaxin / epimorphin family	IPR006012	4	4	4	3	3	4	6	6	5	3	2	9	4	5	4	3	4	2	2	2	6	2	2	3
RNA binding activity-knot of a chromodomain	IPR025995	8	7	7	11	4	2	1	10	1	2	7	3	2	2	4	3	2	5	1	3	2	3	1	3
5'-NUCLEOTIDASE-RELATED	IPR006179	2	10	3	5	4	5	4	6	0	4	9	0	2	4	2	0	1	2	2	8	1	9	6	1
DNA-DIRECTED RNA POLYMERASE I SUBUNIT 2	IPR015712	4	4	4	2	5	4	3	2	5	3	7	6	4	4	3	3	3	5	0	3	3	4	4	5
PIF1-like helicase	IPR010285	11	5	7	7	0	1	1	8	1	8	4	0	4	0	1	3	1	1	1	0	0	16	0	14
DEAD_2	IPR010614	1	3	6	2	3	3	1	3	4	5	3	5	5	4	5	3	5	4	4	3	4	4	4	5
Domain of unknown function (DUF4217)	IPR025313	3	3	4	3	4	4	3	4	4	4	7	2	4	3	4	3	4	2	2	4	4	4	6	4
Peptidase family M3	IPR001567	5	3	4	3	4	3	4	4	3	6	6	1	4	4	4	2	4	2	2	4	2	5	5	4
Phospholipid-translocating P-type ATPase C-terminal	IPR032630	3	4	9	1	4	1	4	3	3	11	4	3	5	7	2	4	1	6	3	1	4	1	1	6
TNF RECEPTOR ASSOCIATED FACTOR	IPR043211	5	6	3	3	1	0	0	2	0	52	3	0	0	0	5	1	4	3	1	0	0	0	2	1
BAX INHIBITOR-RELATED Inhibitor of apoptosis-promoting Bax1	IPR006214	6	5	8	6	2	3	3	7	4	4	7	2	3	6	0	3	0	5	1	1	3	3	1	9
Sec63 Brl domain	IPR004179	6	4	5	2	3	3	3	5	4	3	4	3	4	4	4	4	4	3	3	5	5	2	3	4
PRE-MRNA SPLICING FACTOR	IPR045075	4	4	5	3	5	3	3	5	3	3	7	3	3	3	3	3	3	5	3	4	3	5	3	3
Extended PHD (ePHD) domain	IPR034732	2	3	3	5	3	8	5	2	6	2	4	4	3	7	8	4	5	3	3	3	5	0	1	4
Acetyl-coenzyme A (CoA) carboxyltransferase C-terminal domain	IPR011763	7	4	5	3	6	4	2	5	3	5	5	5	1	3	2	5	2	2	0	4	6	3	4	3
GYF domain GYF domain	IPR003169	10	10	9	7	1	3	3	5	1	4	5	2	1	2	3	2	4	1	4	3	1	3	1	6
DDE superfamily endonuclease	IPR038717	0	0	2	0	0	0	1	1	0	3	3	0	0	0	1	0	0	0	0	0	79	2	0	0
WWE domain WWE domain	IPR004170	4	13	10	5	4	0	0	17	0	7	15	0	1	7	0	0	0	4	0	0	0	0	0	3
SLOG in TRPM	IPR041491	8	33	14	9	0	0	0	12	0	0	10	0	0	4	0	0	0	2	0	0	0	0	0	0
Vps4 C terminal oligomerisation domain	IPR015415	3	6	5	4	5	2	3	4	3	4	9	2	2	2	3	5	3	4	1	3	3	2	6	5
UvrD-like DNA helicase C-terminal domain UvrD-like helicase C-terminal domain	IPR014017	3	8	12	7	2	1	4	7	0	4	14	1	1	2	2	1	2	5	3	1	1	5	2	1
VACUOLAR CALCIUM ION TRANSPORTER	IPR004713	6	6	4	6	3	2	3	10	2	7	7	1	2	1	1	3	0	4	2	3	4	4	3	5
Ferric reductase like transmembrane component	IPR013130	4	5	13	7	0	1	3	3	1	6	9	1	6	1	2	3	1	1	4	2	9	2	3	3
Acetyl-coenzyme A (CoA) carboxyltransferase N-terminal domain	IPR011762	7	4	4	3	6	3	2	5	3	5	5	5	1	3	2	5	2	1	0	5	6	3	4	3
Middle or third domain of peptidase_M16	IPR032632	7	9	7	7	1	2	1	6	2	4	8	1	1	3	1	5	1	4	1	4	1	2	3	6
CALCIUM-INDEPENDENT PHOSPHOLIPASE A2 IPLA2 -RELATED	IPR033562	8	8	4	8	0	3	5	4	3	4	7	0	1	5	3	4	3	4	2	4	2	2	2	3
Macro domain Macro domain	IPR002589	7	12	14	4	2	1	3	10	2	5	6	1	0	1	0	2	1	3	2	2	1	2	2	7
Fringe-like	IPR003378	12	18	11	13	2	0	0	7	0	5	4	5	3	1	0	2	0	0	2	0	1	0	1	3
Protein of unknown function (DUF3638)	IPR022099	3	13	17	4	3	2	3	10	0	13	5	0	0	1	1	2	1	3	3	1	0	2	1	2
PROTEASE M3 THIMET OLIGOPEPTIDASE-RELATED	IPR045090	5	4	4	3	4	3	5	4	3	5	6	1	4	4	4	2	4	1	2	4	2	5	5	3
Lon N-terminal domain ATP-dependent protease La (LON) substrate-binding domain	IPR003111	4	6	6	6	1	4	4	4	4	1	1	2	5	4	5	4	3	3	3	4	4	3	3	6
Prolyl oligopeptidase, N-terminal beta-propeller domain	IPR023302	6	6	5	6	2	4	3	3	5	4	9	2	2	4	2	3	1	3	0	2	3	6	2	4
Alternative oxidase ALTERNATIVE OXIDASE	IPR002680	4	3	3	5	4	2	4	5	3	4	5	3	2	9	2	3	4	5	1	3	2	3	4	5
C-terminal to LisH (CTLH) motif	IPR006595	6	6	5	7	0	5	4	2	7	4	4	8	7	8	1	4	0	3	0	0	6	0	0	4
Ribosomal protein L1p/L10e family	IPR028364	5	4	3	4	1	4	4	4	4	4	5	4	3	4	4	3	3	4	3	3	3	4	4	4
Pumilio-family RNA binding repeat Pumilio RNA-binding repeat	IPR001313	2	4	4	2	1	3	3	4	3	5	5	5	3	3	3	2	2	6	1	4	3	5	7	7
NAD-dependent glycerol-3-phosphate dehydrogenase C-terminus	IPR006109	9	5	4	5	2	3	5	3	3	3	6	3	2	4	1	3	2	5	2	3	4	3	3	3
Smr domain	IPR002625	4	5	2	4	4	8	4	3	5	1	6	3	3	3	3	2	1	1	2	4	3	6	7	1
ADAPTOR COMPLEXES SMALL SUBUNIT FAMILY	IPR016635	5	4	2	5	6	3	3	4	3	5	3	4	2	4	4	4	4	3	2	4	2	3	4	4
Region found in RelA / SpoT proteins	IPR007685	5	6	9	4	3	2	2	7	4	0	7	4	2	2	4	3	4	2	3	3	4	3	4	1
ASPARTYL/ASPARAGINYL BETA-HYDROXYLASE	IPR039038	5	15	10	9	6	1	0	16	0	1	8	0	1	1	1	1	0	2	5	2	1	1	1	2
Glyceraldehyde 3-phosphate dehydrogenase, NAD binding domain	IPR020828	5	4	1	5	2	4	3	5	3	2	5	2	2	5	5	4	3	3	1	6	2	4	5	3
1,3-beta-glucan synthase component	IPR003440	10	8	34	6	2	1	7	2	0	2	2	0	0	0	0	1	2	2	1	1	0	1	1	7
PEPTIDYLPROLYL ISOMERASE	IPR044609	10	7	7	6	6	2	5	6	2	1	5	1	1	4	3	2	3	4	2	3	2	4	2	2
GLUTAREDOXIN FAMILY MEMBER	IPR004480	5	3	3	3	3	4	5	3	5	4	7	2	3	5	4	5	4	2	2	3	3	3	3	4
Sigma-70, region 4	IPR007630	9	7	2	4	6	3	1	4	3	1	3	5	5	0	1	4	1	2	2	5	6	3	7	0
Tic22-like family PROTEIN TIC 22, CHLOROPLASTIC	IPR007378	11	8	7	6	0	1	1	9	1	2	3	3	3	2	0	1	0	1	3	3	4	6	7	3
Eukaryotic-type carbonic anhydrase Alpha-carbonic anhydrases	IPR001148	4	2	0	2	1	4	3	1	2	8	4	2	5	16	1	1	0	4	0	5	4	2	3	11
Redoxin	IPR013740	4	2	2	2	2	4	3	5	3	7	8	2	1	6	2	4	3	7	0	4	1	6	1	5
RNA polymerase Rpb2, domain 6	IPR007120	4	3	4	2	5	4	3	2	4	3	7	5	4	4	3	3	3	6	0	3	3	3	4	4
6-PHOSPHOFRUCTO-2-KINASE/FRUCTOSE-2,6-BISPHOSPHATASE	IPR003094	8	9	7	3	4	2	2	7	1	0	16	2	1	4	2	5	2	2	3	2	2	2	2	0
RNA polymerase Rpb1, domain 5	IPR007081	4	3	4	3	4	4	3	2	4	3	4	6	5	4	3	3	3	6	2	3	3	3	4	3
Ferric reductase NAD binding domain	IPR013121	7	4	11	4	0	1	3	2	2	3	8	2	6	2	0	2	0	0	4	3	10	7	4	3
Peptidase family M1 domain	IPR014782	5	3	3	2	3	5	4	4	3	4	5	5	4	5	4	4	5	1	2	3	3	4	4	3
SAM-dependent O-methyltransferase class I-type O-methyltransferase	IPR002935	4	7	6	4	5	2	2	2	5	8	5	1	4	4	2	1	2	4	5	2	3	2	1	4
Gamma tubulin complex component C-terminal	IPR040457	5	5	5	3	1	4	4	4	4	4	6	5	4	5	5	4	5	2	2	2	2	0	2	5
Cytidine and deoxycytidylate deaminases zinc-binding region	IPR016192	3	5	4	3	3	5	2	3	4	4	3	5	5	7	5	1	5	3	2	3	3	2	4	3
Nucleotidyl transferase	IPR005835	6	5	7	4	4	4	6	6	6	3	6	4	4	1	4	1	5	4	3	1	3	0	0	2
ENTH domain ENTH domain	IPR013809	2	5	3	3	2	3	4	8	3	3	7	6	3	3	3	4	2	5	2	3	4	3	3	2
MOSC domain MOSC domain	IPR005302	6	11	4	3	2	2	2	6	3	3	11	3	2	1	1	1	2	2	5	5	2	4	2	3
AQUAPORIN TRANSPORTER	IPR034294	8	5	1	6	3	6	2	6	5	3	6	0	3	9	0	6	1	1	2	2	2	1	2	7
Phospholipid methyltransferase	IPR007318	7	4	4	7	2	3	3	8	2	4	4	4	6	4	2	1	1	7	3	1	5	3	2	2
Sodium Bile acid symporter family	IPR002657	3	3	5	3	4	2	2	1	4	2	8	3	3	4	2	3	3	7	2	5	3	3	6	2
Dbl homology (DH) domain	IPR000219	8	23	17	13	3	0	0	8	0	0	3	1	0	3	0	2	0	2	6	0	0	0	0	0
Sec23/Sec24 helical domain	IPR006900	6	5	7	4	2	3	4	4	4	3	4	4	4	2	5	3	5	1	3	3	4	1	3	3
STRAWBERRY NOTCH-RELATED	IPR026741	7	6	8	4	5	5	3	7	4	2	7	0	0	3	1	2	2	7	3	0	0	4	1	7
Fructose-bisphosphate aldolase class-I FRUCTOSE-BISPHOSPHATE ALDOLASE	IPR000741	4	1	6	4	4	3	4	4	4	4	7	6	3	3	2	4	3	4	0	2	3	3	1	4
Bromodomain	IPR018359	6	4	2	5	1	1	5	5	2	3	7	2	3	5	2	4	4	5	3	7	3	2	3	1
ATP-dependent Clp protease adaptor protein ClpS	IPR003769	6	5	5	5	1	2	1	7	1	1	6	2	5	6	0	4	0	4	4	4	4	4	5	2
PHOSPHATE TRANSPORTER Phosphate transporter family	IPR001204	1	3	4	1	4	4	12	3	4	2	12	1	4	6	1	1	2	5	2	1	11	0	2	2
Translation initiation factor SUI1 Translation initiation factor SUI1 family	IPR001950	6	6	3	4	2	3	3	6	3	4	4	3	2	5	5	1	3	2	2	3	2	6	3	3
Sec23/Sec24 zinc finger	IPR006895	4	7	4	5	2	3	4	6	3	3	3	4	4	3	4	3	4	2	3	3	5	0	3	3
Carboxylesterase family	IPR002018	3	9	13	2	8	0	1	9	0	2	18	0	0	1	0	3	0	2	0	1	1	1	0	11
Biotinyl protein ligase (BPL) and lipoyl protein ligase (LPL) catalytic domain Biotin/lipoate A/B protein ligase family	IPR004143	4	4	3	4	3	2	4	3	4	4	7	4	3	3	4	3	4	3	2	3	3	2	4	4
Vitamin B6 photo-protection and homoeostasis RUS1 FAMILY PROTEIN C16ORF58	IPR006968	1	3	5	3	1	4	4	2	2	2	7	6	4	2	4	4	2	4	4	4	5	6	3	2
Glycosyl hydrolase family 1 GLYCOSYL HYDROLASE	IPR001360	5	11	7	7	1	2	2	4	8	2	13	0	1	0	0	5	1	5	1	1	0	1	1	9
FAMILY NOT NAMED	IPR028427	8	10	5	5	8	1	3	9	2	3	8	1	1	4	1	2	1	1	1	2	6	0	1	2
GAMMA TUBULIN COMPLEX PROTEIN	IPR007259	5	4	5	3	0	5	5	4	4	5	5	3	4	5	5	4	5	2	2	2	2	0	2	5
ERV/ALR sulfhydryl oxidase domain Erv1 / Alr family	IPR017905	5	6	4	5	4	2	3	3	2	5	8	2	1	3	3	3	3	3	2	3	2	5	5	2
Glycosyltransferase family 25 (LPS biosynthesis protein)	IPR002654	6	16	8	9	6	1	0	5	1	1	9	3	1	5	3	3	0	3	3	0	1	1	0	0
Thiamine pyrophosphate enzyme, N-terminal TPP binding domain	IPR012001	2	5	8	4	1	6	3	2	5	10	6	2	1	2	3	3	2	5	2	3	2	1	3	5
Methyltransferase small domain	IPR007848	4	9	2	2	4	2	1	9	3	0	6	3	5	8	2	3	4	1	6	2	2	1	4	2
Domain of unknown function (DUF2431)	IPR019446	5	6	7	7	0	0	0	6	0	5	7	0	0	6	2	1	3	10	5	3	1	3	3	2
ADENOSINE/GUANOSINE DIPHOSPHATASE GDA1/CD39 (nucleoside phosphatase) family	IPR000407	4	3	3	3	2	1	4	7	2	5	11	1	2	3	4	2	4	4	4	3	3	3	3	3
DTW domain	IPR005636	7	9	8	6	1	2	2	4	1	4	6	0	3	6	4	3	1	1	3	4	0	4	3	1
HIT domain	IPR001310	5	5	4	3	2	3	2	5	3	5	6	2	2	5	3	4	2	3	3	3	3	3	3	4
Phosphoglycerate kinase Phosphoglycerate kinase [pgk] PHOSPHOGLYCERATE KINASE	IPR001576	8	6	2	6	2	3	2	3	3	4	6	2	2	4	2	4	2	4	3	3	2	2	5	3
Glutamine synthetase, catalytic domain	IPR008146	3	11	1	4	5	3	4	4	4	1	7	1	4	6	3	2	1	2	3	2	3	4	3	3
SRP54-type protein, GTPase domain	IPR000897	2	2	2	2	4	4	4	2	4	5	3	5	4	4	4	4	4	1	4	4	4	3	4	4
HRDC domain HRDC domain	IPR002121	4	7	3	7	2	1	4	9	1	2	21	1	0	2	1	3	0	1	4	3	3	2	1	2
DNAJ-LIKE-2, ISOFORM A-RELATED	IPR044713	4	5	5	3	5	2	2	3	2	3	4	5	2	8	2	4	1	4	2	5	2	3	4	3
NUBPL iron-transfer P-loop NTPase	IPR033756	5	4	2	4	4	3	2	4	3	4	5	3	2	5	3	4	3	4	3	4	3	2	3	3
CELL DIVISION CYCLE 20 CDC20 FIZZY -RELATED	IPR033010	7	4	6	6	4	2	2	5	2	2	8	2	2	3	2	3	5	4	2	4	2	1	5	0
Triosephosphate isomerase Triosephosphate isomerase (TIM) family TRIOSEPHOSPHATE ISOMERASE	IPR000652	4	5	2	3	6	2	1	6	2	3	4	1	2	3	3	3	4	4	3	4	2	6	5	2
Sperm-tail PG-rich repeat	IPR010736	8	13	10	10	3	1	2	20	1	1	2	0	0	4	2	1	0	5	2	0	0	0	0	1
Thrombospondin type-1 (TSP1) repeat Thrombospondin type 1 domain	IPR000884	1	0	0	0	0	3	0	0	3	38	0	0	0	5	3	0	1	0	0	0	0	1	1	30
Domain of unknown function (DUF202)	IPR003807	4	5	3	3	2	4	5	2	3	4	12	5	4	2	2	2	1	1	2	5	5	1	3	3
SODIUM-BILE ACID COTRANSPORTER	IPR004710	3	3	5	4	5	2	3	1	3	1	7	3	3	4	2	2	3	6	2	5	3	3	6	1
Initiation factor 2 subunit family	IPR000649	4	5	5	4	2	3	4	4	4	1	4	4	2	3	3	5	3	2	1	4	4	5	5	1
Cofilin/tropomyosin-type actin-binding protein ADF-H domain	IPR002108	9	8	9	4	3	1	1	6	1	2	9	1	2	5	1	2	3	5	4	2	2	1	1	2
GB1/RHD3-type guanine nucleotide-binding (G) domain	IPR030386	1	5	3	2	7	2	5	3	3	1	7	5	5	6	4	4	1	4	5	1	4	2	1	4
DNA TOPOISOMERASE, TYPE IA, CORE PROKARYOTIC DNA TOPOISOMERASE	IPR000380	6	6	6	6	2	3	2	5	3	4	3	3	2	5	3	4	3	4	0	3	3	1	2	3
VESICULAR-FUSION PROTEIN NSF	IPR039812	7	6	5	8	4	1	1	5	1	1	8	1	1	2	2	3	2	4	5	5	1	2	3	1
Thioesterase superfamily	IPR006683	4	10	3	6	2	5	5	3	2	4	9	4	1	4	4	1	4	2	3	2	2	0	0	2
SAM (S-ADENOSYL METHIONINE) TRANSPORTER Sugar-tranasporters, 12 TM	IPR008509	5	4	3	5	3	1	2	5	2	3	10	1	2	5	2	2	2	4	3	3	1	4	4	3
TRANSLATION INITIATION FACTOR IF-2-RELATED	IPR015760	3	4	4	2	4	3	3	3	3	5	5	3	2	5	3	3	3	3	3	4	2	5	3	4
PEROXIREDOXIN	IPR037944	4	2	2	2	2	3	3	6	2	5	9	2	1	6	2	3	3	7	0	3	1	5	1	5
DNA MISMATCH REPAIR PROTEIN MLH, PMS, MUTL	IPR038973	3	5	4	3	4	2	4	3	3	3	5	5	4	3	4	4	3	4	2	2	4	3	3	3
CHAT domain	IPR024983	8	18	5	10	1	0	0	6	0	4	5	0	7	5	0	3	0	3	3	1	0	0	1	2
Endoribonuclease L-PSP 2-IMINOBUTANOATE/2-IMINOPROPANOATE DEAMINASE RIDA	IPR006175	4	8	8	2	3	3	3	7	1	3	8	2	4	2	2	1	3	5	1	1	4	3	3	2
Activator of Hsp90 ATPase, N-terminal	IPR015310	8	9	5	6	1	2	3	8	3	2	6	1	1	5	4	1	3	2	5	2	1	2	1	3
Uncharacterized protein family UPF0004 Methylthiotransferase N-terminal domain	IPR013848	3	4	5	2	3	4	3	3	4	2	6	3	3	4	4	3	4	3	2	3	3	3	3	3
DSHCT (NUC185) domain	IPR012961	3	5	7	2	1	4	2	6	3	4	6	4	3	2	4	3	4	3	2	3	4	1	3	3
MAGNESIUM-DEPENDENT PHOSPHATASE 1 MDP1 Acid Phosphatase	IPR010036	6	8	9	7	4	2	1	4	1	5	9	1	0	3	2	0	2	2	3	3	1	2	2	2
Tetrapyrrole (Corrin/Porphyrin) Methylases	IPR000878	3	4	4	2	5	4	4	3	4	4	4	3	4	4	5	3	4	3	1	2	5	1	3	4
Squalene/phytoene synthase	IPR002060	4	3	4	4	3	3	3	3	3	2	6	2	3	5	4	3	4	4	2	4	3	3	4	2
PAH domain Paired amphipathic helix repeat	IPR003822	6	4	5	4	8	3	1	10	1	1	8	1	2	6	2	2	3	1	2	2	2	3	4	2
POLYKETIDE SYNTHASE-RELATED	IPR000794	5	4	7	3	3	3	3	5	3	1	5	2	1	6	4	3	4	3	3	4	2	2	4	1
CYSTEINE-RICH SECRETORY PROTEIN-RELATED	IPR001283	5	2	2	4	0	7	12	0	0	13	3	1	0	0	1	0	0	0	0	0	0	9	20	6
Glycosyltransferase family 28 C-terminal domain	IPR007235	1	5	3	1	4	1	3	4	1	2	7	4	5	6	3	3	2	4	1	5	6	1	4	3
Ribosomal protein L10 39S RIBOSOMAL PROTEIN L10, MITOCHONDRIAL	IPR001790	4	4	3	3	4	3	3	4	3	4	5	3	3	3	3	3	3	5	4	3	3	2	3	3
Collagen triple helix repeat (20 copies)	IPR008160	2	1	1	2	0	0	2	0	8	3	0	0	0	55	0	2	0	2	0	0	0	4	0	2
FGGY family of carbohydrate kinases, N-terminal domain	IPR018484	4	4	5	4	3	3	3	3	2	3	4	4	3	4	4	2	2	1	3	5	3	1	4	5
6-phosphofructo-2-kinase	IPR013079	7	6	7	4	4	2	2	6	1	0	14	2	1	4	2	5	2	2	3	2	2	2	2	0
NYN domain	IPR021139	8	7	4	5	2	0	1	7	1	7	4	2	1	2	2	0	0	3	1	2	1	2	1	19
Zinc finger C3H1-type	IPR000571	4	4	7	4	0	2	1	4	0	19	2	0	0	0	3	1	1	2	3	1	0	3	1	20
Alpha galactosidase C-terminal beta sandwich domain	IPR041233	8	14	13	8	4	3	0	11	4	2	9	1	0	1	0	1	0	2	2	0	0	0	0	1
TB2/DP1, HVA22 family HVA22-LIKE PROTEINS	IPR004345	2	5	3	3	2	3	3	2	4	3	7	3	4	5	4	5	3	4	3	3	0	3	3	3
Asparagine synthase	IPR001962	7	6	3	5	3	3	3	1	2	4	4	3	2	4	4	3	3	4	3	2	3	3	2	2
3' exoribonuclease family, domain 2	IPR015847	2	3	3	2	0	5	4	4	5	0	1	4	9	4	4	6	5	3	2	2	5	1	2	4
Thiolase, N-terminal domain	IPR020616	3	5	7	4	4	4	2	3	2	3	3	3	4	5	1	4	1	4	1	4	3	3	4	2
INORGANIC PYROPHOSPHATASE Inorganic pyrophosphatase	IPR008162	5	6	2	3	8	2	3	7	3	4	6	2	2	1	1	4	1	3	3	3	2	4	3	2
Synaptotagmin-like mitochondrial lipid-binding proteins (SMP) domain	IPR031468	6	3	6	1	3	4	5	1	8	1	3	3	4	1	12	4	8	1	0	2	2	0	2	1
ANCIENT CONSERVED DOMAIN PROTEIN-RELATED	IPR045095	4	5	6	4	4	2	5	3	4	3	5	4	2	3	1	5	1	3	2	3	4	2	3	2
FAD-binding domain	IPR013112	3	3	9	5	0	0	3	2	2	5	8	1	6	0	3	1	1	1	4	3	9	4	3	3
Phosphoglucomutase/phosphomannomutase, alpha/beta/alpha domain III	IPR005846	5	5	5	3	3	3	3	3	5	2	4	3	4	3	2	4	2	1	1	4	4	3	4	2
Protein of unknown function, DUF393	IPR007263	6	6	6	5	3	2	4	3	2	2	5	2	3	3	4	3	3	0	1	2	3	3	4	3
Peptidase family M48	IPR001915	3	4	3	6	3	4	4	5	2	3	5	3	3	3	2	4	0	1	3	3	3	3	5	3
tRNA synthetases class I (M)	IPR015413	1	3	4	2	4	4	2	3	4	3	4	4	3	7	3	4	2	3	3	3	4	3	3	3
CUE domain CUE domain	IPR003892	7	9	3	6	0	4	2	9	4	6	4	3	1	4	3	1	1	5	2	1	2	0	2	2
TRANSCRIPTION INITIATION FACTOR TFIID	IPR037783	2	6	9	5	2	2	4	5	1	2	2	4	7	11	3	2	1	3	1	1	1	2	2	2
E2F/DP family winged-helix DNA-binding domain	IPR003316	3	3	6	2	2	3	3	4	3	0	3	8	5	4	4	3	3	2	2	5	4	1	3	3
10 kDa chaperonin [groS] Chaperonin 10 Kd subunit 10 KDA HEAT SHOCK PROTEIN	IPR020818	3	3	1	3	4	4	4	3	4	3	4	2	3	2	3	3	3	3	4	4	3	4	4	4
Phosphorylated CTD interacting factor 1 WW domain	IPR022035	8	10	5	5	3	0	0	8	0	4	8	0	1	4	5	2	4	0	3	2	1	2	2	2
CARBONIC ANHYDRASE	IPR023561	4	1	0	2	0	4	3	1	2	8	4	2	5	15	1	1	0	4	0	4	4	0	2	10
Surp module SURP motif repeat	IPR000061	4	5	4	4	1	3	5	4	5	4	4	4	1	5	4	3	3	2	3	2	1	2	3	4
Glycosyltransferase family 10 (fucosyltransferase) C-term ALPHA- 1,3 -FUCOSYLTRANSFERASE	IPR001503	5	4	8	6	3	1	1	6	4	4	2	1	0	10	0	1	2	4	2	3	2	2	5	4
RhoGAP domain Rho GTPase-activating proteins domain	IPR000198	8	13	14	10	1	2	1	3	0	0	2	2	2	6	2	5	0	2	4	1	1	0	1	1
CARBOHYDRATE SULFOTRANSFERASE	IPR018011	15	4	5	10	1	0	0	0	0	0	7	0	3	2	1	1	1	0	1	3	14	1	8	0
Late exocytosis, associated with Golgi transport	IPR032880	2	4	3	2	3	6	8	0	4	0	0	1	5	1	4	5	3	1	5	7	4	4	2	1
MutS domain I	IPR007695	1	5	6	2	1	3	1	4	5	3	4	4	3	5	6	4	5	3	2	2	3	4	2	2
Cullin protein neddylation domain	IPR019559	4	3	2	2	6	2	3	3	3	4	5	5	4	3	3	4	3	1	3	3	6	0	4	3
Pumilio homology domain (PUM-HD)	IPR033133	3	3	4	3	1	2	3	3	3	5	5	4	3	2	3	3	2	4	1	3	2	5	7	5
Thiolase, C-terminal domain	IPR020617	4	5	6	4	4	3	2	3	2	3	4	3	4	4	1	4	1	4	1	4	3	2	4	2
Polyamine aminopropyltransferase [speE] SPERMIDINE/SPERMINE SYNTHASE	IPR001045	3	3	1	3	5	1	2	3	2	2	2	3	3	2	2	1	2	2	2	6	2	9	8	2
NB-ARC domain	IPR002182	7	11	5	12	1	0	0	2	0	8	0	0	24	0	0	0	0	0	1	3	0	1	3	0
Carbohydrate esterase, sialic acid-specific acetylesterase	IPR005181	15	10	8	16	2	0	1	4	0	0	9	0	0	2	0	1	0	1	2	3	0	2	0	1
DNA topoisomerase	IPR013497	6	5	6	6	2	3	2	4	3	4	3	3	2	4	3	3	3	3	0	3	3	1	2	3
SMALL NUCLEAR RIBONUCLEOPROTEIN SM	IPR027141	2	3	1	3	5	3	3	3	3	3	4	4	3	3	3	4	4	3	2	4	4	2	5	3
TRANSMEMBRANE EMP24 DOMAIN-CONTAINING PROTEIN	IPR015720	3	1	1	2	3	2	3	2	0	4	2	5	9	3	2	4	3	2	1	6	5	4	4	4
FG-GAP repeat	IPR013519	0	7	7	0	5	0	0	3	0	13	2	0	1	2	2	4	0	0	3	3	1	13	14	1
Aminomethyltransferase folate-binding domain	IPR006222	3	5	6	3	5	3	2	5	2	4	8	3	2	4	2	2	3	2	1	3	1	2	3	4
Pyridoxal-dependent decarboxylase, pyridoxal binding domain	IPR022644	3	4	3	4	3	3	4	4	4	3	4	6	3	5	3	3	2	2	2	3	4	1	2	3
TRAM domain TRAM domain	IPR002792	4	4	4	3	3	4	3	3	4	2	3	2	3	5	4	2	4	3	0	3	5	3	3	3
RNA polymerase Rpb2, domain 7	IPR007641	3	3	4	1	4	2	3	2	4	3	6	5	3	4	3	3	3	5	0	3	3	2	4	4
SnoaL-like domain	IPR037401	3	6	1	6	2	3	7	4	1	1	4	1	5	7	3	4	2	2	4	2	2	3	1	4
Peripheral subunit-binding (PSBD) domain e3 binding domain	IPR004167	2	2	5	2	3	3	4	4	4	2	6	5	3	3	3	4	3	2	4	5	2	1	3	2
DNA ligase N terminus	IPR012308	2	6	9	2	1	3	3	5	3	3	6	3	2	4	2	3	2	4	1	4	3	1	2	4
Phosphofructokinase	IPR000023	4	4	4	2	4	4	3	4	3	5	3	6	3	4	3	2	2	2	2	4	3	3	2	3
Tubulin binding cofactor C	IPR012945	3	5	9	4	2	2	3	7	1	3	4	2	2	4	3	2	3	4	3	3	2	2	3	3
DJ-1/PfpI family	IPR002818	4	5	5	4	3	2	5	5	4	1	9	2	1	4	2	2	2	4	2	2	3	3	2	2
GP-PDE domain Glycerophosphoryl diester phosphodiesterase family	IPR030395	2	3	4	5	0	4	8	4	3	5	2	3	2	3	2	3	2	1	1	4	3	6	2	6
Dpy-30 motif	IPR007858	9	7	9	6	1	1	3	5	2	4	3	1	1	6	5	1	1	3	2	1	2	1	1	4
GLUCOSE-METHANOL-CHOLINE GMC OXIDOREDUCTASE	IPR012132	5	3	3	2	5	1	1	5	1	6	9	2	7	3	0	7	0	5	2	4	2	2	2	0
Thiamine pyrophosphate enzyme, C-terminal TPP binding domain	IPR011766	4	4	8	2	0	5	2	2	5	11	7	2	0	4	2	2	2	1	2	2	2	1	3	6
PYRUVATE DEHYDROGENASE KINASE	IPR039028	5	2	3	1	3	2	3	6	2	6	3	2	1	5	1	4	1	3	2	4	2	4	3	9
RNA polymerase beta subunit	IPR007644	3	2	4	2	5	3	3	2	3	3	5	6	3	4	3	3	3	4	0	3	3	2	4	3
Clp repeat (R) domain Clp amino terminal domain, pathogenicity island component	IPR004176	3	5	2	2	3	4	3	2	4	5	6	4	1	3	3	3	3	1	3	2	2	3	3	6
Helix-loop-helix DNA-binding domain Myc-type, basic helix-loop-helix (bHLH) domain	IPR011598	3	5	0	3	0	2	8	2	5	0	0	4	11	14	2	3	1	0	1	3	3	2	5	0
80 KDA MCM3-ASSOCIATED PROTEIN	IPR045107	2	5	5	4	3	3	2	4	3	3	5	2	4	3	2	4	3	3	2	4	2	3	2	3
RNA polymerase Rpb2, domain 3	IPR007645	3	3	4	2	5	3	2	2	4	3	5	5	3	4	3	3	3	3	0	3	3	2	4	3
Phospholipid-translocating ATPase N-terminal	IPR032631	3	2	6	1	4	1	3	4	3	8	3	3	4	7	2	3	1	5	3	1	4	0	0	6
RNA polymerase Rpb1, domain 4	IPR007083	3	2	3	1	3	1	3	2	4	3	4	6	6	4	3	3	3	3	2	3	3	3	4	3
PROTEIN RKD4	IPR044607	0	1	0	1	0	5	13	2	2	0	0	8	2	30	3	1	2	5	0	0	4	0	0	0
Ribonuclease-III-like Ribonuclease III family domain	IPR000999	3	5	8	3	1	4	3	1	4	8	3	2	4	2	2	1	2	2	0	2	8	2	1	5
Xrn1 helical domain	IPR041412	6	5	7	4	2	0	2	6	0	3	7	4	3	1	2	2	3	3	3	5	3	3	0	3
NmrA-like family	IPR008030	2	4	1	1	1	5	5	3	5	3	7	5	3	8	1	3	2	3	2	4	1	0	2	6
Phosphoribulokinase / Uridine kinase family	IPR006083	3	3	1	2	1	5	4	5	6	4	4	2	3	6	3	2	4	2	2	5	2	3	2	3
ACYL-COA DESATURASE	IPR015876	6	4	7	3	1	1	4	4	1	7	16	2	1	1	1	3	1	1	2	1	3	2	3	2
Pyridoxal-dependent decarboxylase conserved domain	IPR002129	2	4	4	1	2	5	3	5	6	6	7	2	2	4	2	3	2	1	1	2	3	3	2	4
Tetrahydrofolate dehydrogenase/cyclohydrolase, NAD(P)-binding domain	IPR020631	3	2	5	5	4	2	3	2	1	4	5	2	2	4	3	3	3	2	4	3	2	5	3	2
Protein of unknown function (DUF1415)	IPR009858	7	8	2	7	0	0	0	4	0	0	6	0	1	8	2	3	1	5	5	5	3	5	2	0
Glycosyltransferase (GlcNAc) GLCNAC TRANSFERASE-RELATED	IPR021067	2	2	3	1	5	2	3	1	3	3	5	0	0	1	1	5	1	1	7	5	0	8	8	1
Replication factor C C-terminal domain	IPR013748	3	3	1	4	3	3	4	3	4	3	2	4	3	4	4	2	3	2	1	4	4	3	4	3
DNA-BINDING DOMAIN	IPR044808	5	0	5	0	0	0	2	17	2	0	43	0	0	0	1	1	2	0	0	0	0	0	0	0
FAT domain	IPR014009	3	5	7	1	5	0	2	4	3	1	5	4	3	3	3	4	3	4	1	3	3	2	3	2
ORGANIC SOLUTE TRANSPORTER-RELATED Organic solute transporter Ostalpha	IPR005178	1	1	1	1	5	2	2	1	2	10	2	1	1	5	3	6	2	2	4	4	1	4	6	7
UNCHARACTERIZED	IPR011691	7	7	5	4	5	2	2	6	2	2	7	1	1	1	2	3	2	3	4	3	2	1	1	2
impB/mucB/samB family C-terminal domain	IPR017961	2	6	6	0	0	2	4	5	4	4	7	2	3	1	3	3	3	1	2	3	1	2	2	7
FAD binding domain	IPR003953	2	3	3	1	1	4	3	2	2	8	3	2	1	2	6	3	5	5	2	4	2	1	3	7
Lyase	IPR022761	3	2	6	3	5	3	2	2	3	3	3	4	3	3	4	3	4	2	1	3	4	3	3	3
XPA-BINDING PROTEIN 1-RELATED Conserved hypothetical ATP binding protein	IPR004130	4	3	4	2	3	3	3	3	3	3	4	4	3	3	3	3	3	2	3	4	3	3	3	3
FER-1-LIKE	IPR037721	5	11	10	4	3	0	0	5	0	9	2	1	5	2	1	0	1	3	3	0	3	0	0	10
RNA polymerase Rpb1, domain 2	IPR000722	3	3	2	1	3	0	3	2	4	4	4	5	6	4	3	3	3	2	2	4	3	3	4	3
UBIQUITIN LIGASE E3 ALPHA-RELATED	IPR039164	2	4	16	3	0	1	1	7	0	5	6	1	1	3	1	5	0	10	2	2	1	0	2	2
3-hydroxyacyl-CoA dehydrogenase, NAD binding domain	IPR006176	4	4	5	4	4	2	2	7	2	1	10	2	1	3	1	3	1	2	3	3	2	3	3	2
MGS-like domain MGS-like domain	IPR011607	5	3	3	4	3	2	2	3	2	2	7	3	4	3	3	3	2	2	2	3	3	5	3	2
TLC ATP/ADP transporter FAMILY NOT NAMED	IPR004667	4	4	2	2	2	3	3	2	3	1	6	1	1	1	1	6	1	5	1	6	1	5	8	2
GLYCOSYLTRANSFERASE Alg9-like mannosyltransferase family	IPR005599	1	4	2	3	0	3	0	4	2	6	2	3	3	3	4	4	4	5	2	3	2	5	5	3
PHOSPHORYLATED CTD INTERACTING FACTOR 1	IPR039881	9	9	5	5	2	0	0	7	0	4	8	0	0	4	5	1	4	0	3	1	1	2	2	2
RNA polymerase Rpb1, domain 3	IPR007066	3	2	3	1	3	1	3	2	4	4	4	5	6	4	3	3	3	1	2	3	3	3	4	3
X-domain of DnaJ-containing	IPR026894	8	6	7	5	1	2	1	4	3	1	6	0	3	0	1	3	1	3	4	3	2	4	4	1
TatD related DNase	IPR001130	3	5	5	2	1	2	4	4	2	5	5	2	2	1	3	4	2	2	4	6	1	2	4	2
Homeobox KN domain	IPR008422	1	3	3	3	0	0	3	1	0	0	0	3	2	9	3	1	3	2	4	5	7	10	10	1
UNCHARACTERIZED	IPR043533	8	13	5	4	5	0	6	9	0	4	0	0	0	1	2	0	0	2	7	0	0	1	1	9
FAT domain	IPR003151	2	7	6	1	3	1	3	5	3	1	5	4	3	3	3	3	3	3	2	3	3	2	3	2
CPSF A subunit region	IPR004871	2	3	5	1	2	3	3	3	3	4	6	5	3	4	3	4	3	1	3	3	3	0	3	3
SERINE HYDROXYMETHYLTRANSFERASE Serine hydroxymethyltransferase [glyA]	IPR001085	3	5	3	3	3	3	3	3	2	3	3	3	3	3	3	3	3	4	1	3	3	4	3	3
MULTI-COPPER OXIDASE	IPR045087	1	5	2	2	4	5	6	3	3	13	12	1	3	1	1	3	0	2	1	1	0	3	1	2
Homoserine dehydrogenase	IPR001342	8	6	4	6	3	2	3	5	2	1	4	1	1	2	2	2	2	1	2	3	2	5	4	1
POLYAMINE TRANSPORTER PUT1	IPR044566	4	8	6	7	1	1	1	10	1	1	12	2	0	4	0	2	0	4	1	2	0	2	3	3
RecQ zinc-binding	IPR032284	2	7	2	1	1	3	1	5	3	4	2	3	4	5	3	4	3	3	3	3	3	2	2	4
Transport protein particle (TRAPP) component	IPR007194	3	3	3	3	7	3	3	3	3	3	3	3	3	3	3	3	2	3	1	3	3	3	3	3
NFACT protein RNA binding domain	IPR008532	2	2	6	2	1	3	3	4	3	4	3	2	3	2	4	3	5	2	3	4	3	3	2	3
AIR synthase related protein, C-terminal domain	IPR010918	2	3	4	2	3	3	2	3	3	5	3	4	2	3	3	4	4	3	2	3	3	3	2	4
UPF0176 acylphosphatase like domain	IPR040503	3	4	3	2	5	2	1	3	2	2	4	0	2	4	3	1	2	1	6	6	1	6	6	1
Ubiquitin-activating enzyme active site	IPR019572	5	4	7	3	4	1	2	5	1	3	5	1	2	4	3	4	2	1	3	2	2	3	3	3
Inositol polyphosphate kinase INOSITOL POLYPHOSPHATE KINASE	IPR005522	6	12	6	8	0	1	1	5	1	4	7	1	3	4	1	1	1	2	1	1	2	1	1	5
SULFATE TRANSPORTER	IPR001902	3	5	2	2	3	5	3	2	3	1	6	2	0	4	1	8	0	5	1	3	0	5	3	5
Sec23/Sec24 beta-sandwich domain	IPR012990	4	3	4	3	2	2	2	4	4	4	4	4	3	1	4	3	4	1	3	3	4	1	3	3
PCRF domain	IPR005139	1	3	3	3	3	2	2	2	3	4	5	4	3	3	4	4	3	3	2	3	3	2	3	5
Rubredoxin-like domain	IPR024934	3	3	0	2	1	3	4	3	2	2	2	5	4	3	7	1	4	3	2	4	4	3	2	5
ARID/BRIGHT DNA binding domain ARID domain	IPR001606	1	2	7	4	0	3	5	3	10	1	1	6	5	6	9	2	7	1	0	0	2	0	0	1
FAMILY NOT NAMED	IPR045053	3	6	12	5	0	9	6	2	17	1	3	0	0	0	4	2	3	0	0	0	0	0	0	3
Citrate transporter	IPR004680	2	3	2	1	1	1	6	5	0	5	7	1	3	6	4	1	3	3	0	5	4	2	5	3
LEUCINE AMINOPEPTIDASE-RELATED	IPR011356	2	3	2	4	8	1	2	3	1	3	4	4	2	4	2	3	2	3	3	4	4	2	2	4
Serine hydroxymethyltransferase	IPR039429	3	4	3	3	3	3	3	3	2	3	3	3	3	3	3	3	3	4	1	3	3	4	3	3
Multicopper oxidase	IPR011706	3	5	3	3	2	6	7	3	3	12	7	0	7	2	1	0	0	1	1	0	0	5	1	2
Pheophorbide a oxygenase	IPR013626	5	2	0	2	2	4	8	3	11	2	4	0	2	3	4	3	4	1	2	1	0	3	1	7
RNA polymerase Rpb2, domain 2	IPR007642	3	2	4	2	4	3	3	2	4	2	4	5	3	4	3	3	3	3	0	3	3	2	4	2
NifU-like domain	IPR001075	3	3	3	3	3	3	3	3	3	3	6	3	3	3	3	2	3	3	1	3	4	2	3	3
VDE lipocalin domain	IPR010788	4	5	3	1	3	2	1	4	2	7	4	0	0	1	2	5	3	4	3	5	0	3	4	5
Glycosyl hydrolases family 2, sugar binding domain	IPR006104	7	11	14	5	2	1	1	5	6	1	8	0	0	3	1	1	1	0	0	1	0	3	1	2
lactate/malate dehydrogenase, alpha/beta C-terminal domain	IPR022383	2	2	1	2	1	5	5	3	6	2	3	3	5	3	5	2	5	3	1	1	3	3	2	6
LIM domain LIM zinc-binding domain LIM domain	IPR001781	7	12	9	6	3	1	0	6	0	2	8	3	1	3	3	1	2	2	3	0	2	1	0	0
Pyridoxal-dependent decarboxylase, C-terminal sheet domain	IPR022643	3	4	2	4	3	2	4	4	3	3	3	4	4	5	2	3	2	1	2	4	4	0	2	3
Malic enzyme, NAD binding domain	IPR012302	4	2	5	2	4	3	6	1	5	3	3	1	2	8	4	1	5	3	1	2	3	1	1	4
RNA polymerase Rpb1, domain 1	IPR007080	3	2	1	1	2	3	3	2	4	3	5	5	3	4	3	3	3	3	2	3	3	3	4	3
Lytic polysaccharide mono-oxygenase, cellulose-degrading	IPR004302	5	10	4	2	3	3	1	2	0	7	12	0	8	0	0	0	0	0	1	1	1	12	2	0
C-terminal domain on Strawberry notch homologue	IPR026937	5	6	8	4	3	4	2	6	4	2	6	0	0	3	1	2	2	4	3	0	0	2	1	6
Iron/manganese superoxide dismutases, C-terminal domain	IPR019832	2	2	4	2	2	5	6	2	6	4	2	2	2	5	1	3	1	3	2	2	3	2	3	7
Iron/zinc purple acid phosphatase-like protein C	IPR025733	1	8	6	0	2	5	3	10	10	4	5	1	0	3	3	2	2	1	2	3	0	0	2	0
Ribosomal protein S15 Ribosomal protein S15	IPR000589	5	3	1	3	4	3	3	3	2	3	4	3	2	2	3	4	2	3	3	3	3	3	3	4
Piwi domain Piwi domain	IPR003165	4	5	4	0	0	1	3	4	3	18	6	0	2	0	0	1	0	0	0	1	4	2	1	15
DNA gyrase/topoisomerase IV, subunit A	IPR002205	5	3	9	1	2	2	2	3	2	2	4	3	2	3	2	2	2	3	0	3	4	6	4	3
SAM-dependent methyltransferase TRM10-type domain	IPR028564	7	7	8	6	1	1	2	5	1	2	7	1	1	2	4	4	2	2	1	2	1	2	2	2
Gamma tubulin complex component N-terminal	IPR041470	3	4	4	2	1	5	3	3	4	4	3	3	3	4	5	4	4	1	2	2	2	0	2	5
GRIP domain GRIP domain	IPR000237	3	4	6	5	3	2	3	5	3	1	5	1	0	2	2	3	0	4	1	4	2	5	5	3
Tesmin/TSO1-like CXC domain, cysteine-rich domain CRC domain	IPR005172	3	4	3	3	2	3	3	2	3	0	4	3	2	7	2	4	2	3	2	6	2	1	5	0
Cytosol aminopeptidase family, catalytic domain	IPR000819	2	3	3	3	8	1	2	3	1	3	4	4	2	4	2	3	2	2	3	4	4	2	2	4
UDP-glucoronosyl and UDP-glucosyl transferase	IPR002213	3	1	5	4	2	4	1	1	7	14	14	0	0	0	0	1	1	4	1	1	2	3	1	4
DNA gyrase B	IPR013506	6	4	5	2	2	2	2	3	2	2	3	3	2	2	2	2	2	6	1	3	4	4	4	3
Double-stranded RNA binding motif Double stranded RNA-binding domain (dsRBD)	IPR014720	7	5	9	2	1	2	2	2	4	0	6	4	4	5	2	0	2	6	1	1	4	2	2	0
EUKARYOTIC TRANSLATION INITIATION FACTOR 4E RELATED Eukaryotic initiation factor 4E	IPR001040	3	3	4	3	3	0	1	3	1	7	4	1	2	6	1	3	1	4	2	3	2	1	4	9
Pyruvate phosphate dikinase, AMP/ATP-binding domain	IPR002192	0	1	1	0	2	3	4	1	4	5	1	1	11	5	8	2	8	1	0	1	4	1	2	7
CALCIUM BINDING PROTEIN	IPR029527	7	7	5	7	3	1	0	13	0	4	5	1	1	2	0	2	0	5	1	0	0	2	2	6
Valine--tRNA ligase [valS] VALYL-TRNA SYNTHETASES	IPR002303	2	2	3	2	2	2	3	2	2	5	2	3	16	3	2	3	2	4	1	2	2	2	2	2
RIBULOSE-5-PHOSPHATE-3-EPIMERASE Ribulose-phosphate 3 epimerase family	IPR000056	5	3	5	4	5	3	2	2	1	2	6	1	2	3	3	2	3	3	1	3	3	3	2	4
Translation-initiation factor 2	IPR023115	4	3	4	1	2	3	2	4	3	3	4	3	2	4	3	3	3	1	3	4	2	3	3	4
PEPTIDYL-PROLYL CIS-TRANS ISOMERASE CYP38, CHLOROPLASTIC	IPR044665	6	7	3	3	6	1	1	2	1	3	5	2	2	2	1	3	1	3	3	3	1	6	3	2
Kazal-type serine protease inhibitor domain Kazal domain	IPR002350	5	5	0	8	0	7	10	0	1	15	0	0	0	1	0	2	1	0	1	0	0	8	3	7
Dynamin central region	IPR000375	3	1	5	3	6	3	6	4	3	4	4	1	2	3	2	7	2	1	5	2	1	1	1	3
Trichohyalin-plectin-homology domain	IPR043597	8	4	5	3	3	3	6	4	2	5	1	0	0	5	4	3	3	1	3	0	0	3	2	6
Glycosyltransferase family 17 BETA-1,4-MANNOSYL-GLYCOPROTEIN BETA-1,4-N-ACETYLGLUCOSAMINYL-TRANSFERASE	IPR006813	9	10	6	4	1	1	0	1	3	3	4	1	0	6	2	0	1	0	2	0	3	5	5	6
CID domain CID domain	IPR006569	0	4	3	3	0	4	6	1	5	1	2	3	1	7	4	3	4	4	2	4	1	3	2	3
Pirin	IPR003829	7	5	3	3	4	1	2	4	2	4	2	1	3	3	2	1	2	2	2	5	6	2	4	3
Iron/manganese superoxide dismutases, alpha-hairpin domain	IPR019831	2	2	3	2	2	5	5	2	6	4	1	2	2	5	1	3	1	3	2	2	3	2	4	7
NADP oxidoreductase coenzyme F420-dependent	IPR028939	5	5	2	3	2	3	2	5	2	1	6	2	3	5	2	2	1	2	2	4	2	3	3	2
ELMO/CED-12 family ELMO domain	IPR006816	7	10	5	4	4	0	2	3	0	4	7	3	1	3	2	3	1	1	3	1	2	0	1	5
ATP dependent DNA ligase C terminal region	IPR012309	2	4	6	0	2	5	2	4	3	4	9	3	2	3	2	3	2	3	1	2	3	0	1	4
ATPASE N2B AFG1-like ATPase	IPR005654	4	5	8	5	4	2	3	3	2	2	7	1	1	1	2	2	2	3	2	2	2	3	2	2
Nitrite and sulphite reductase 4Fe-4S domain	IPR006067	10	3	5	1	3	2	3	2	2	3	4	2	3	2	2	2	2	2	2	3	2	3	3	3
Tetrahydrofolate dehydrogenase/cyclohydrolase, catalytic domain	IPR020630	3	2	5	4	3	2	3	3	1	4	4	2	2	4	3	2	3	2	4	3	2	4	3	2
DEVELOPMENTALLY REGULATED GTP-BINDING PROTEIN-RELATED	IPR045086	5	4	4	3	2	2	2	4	2	4	4	2	2	2	3	3	3	4	1	3	2	1	2	5
TUTase nucleotidyltransferase domain	IPR045100	12	3	3	1	1	2	3	2	3	6	3	3	2	8	1	1	1	2	3	1	1	1	0	8
Putative serine esterase (DUF676)	IPR007751	3	3	2	2	2	1	4	3	1	6	5	1	10	2	2	2	1	3	1	3	3	1	2	5
TRNA (GUANINE-9-) METHYLTRANSFERASE	IPR007356	7	7	7	5	1	1	2	5	1	2	7	1	1	2	4	4	2	2	1	2	1	2	2	2
Cytosolic carboxypeptidase N-terminal domain	IPR040626	1	10	8	3	5	1	3	11	2	0	3	0	0	10	3	0	0	3	1	2	0	1	1	4
HEAT-SHOCK PROTEIN 20 FAMILY MEMBER	IPR031107	0	0	0	0	0	2	9	0	4	3	3	3	1	7	4	6	4	0	0	4	8	6	2	7
RIBOSE-PHOSPHATE DIPHOSPHOKINASE FAMILY MEMBER Phosphoribosyl synthetase-associated domain	IPR005946	3	2	4	3	5	2	2	2	2	3	4	2	2	6	3	3	3	3	1	3	3	2	2	5
Nop domain snoRNA binding domain, fibrillarin	IPR002687	2	3	4	3	3	3	3	2	3	3	4	3	3	3	3	3	3	2	2	3	3	3	3	3
PUA domain	IPR002478	3	3	4	2	2	3	3	4	3	3	4	5	3	2	4	2	4	3	0	2	3	2	3	3
Cid1 family poly A polymerase	IPR002058	3	3	7	0	1	2	3	3	3	5	2	2	2	6	1	4	1	2	2	3	2	2	1	8
Inorganic H+ pyrophosphatase K(+)-INSENSITIVE PYROPHOSPHATE-ENERGIZED PROTON PUMP	IPR004131	3	4	4	3	3	2	1	2	2	1	6	3	7	5	3	2	3	3	1	3	3	1	2	4
UBIQUITIN FUSION DEGRADATON PROTEIN 1 Ubiquitin fusion degradation protein UFD1	IPR004854	5	5	4	3	2	2	2	5	2	3	7	1	1	2	2	4	2	3	3	3	1	2	3	3
Staphylococcal nuclease homologue Thermonuclease domain	IPR016071	3	3	3	4	2	3	2	3	1	2	5	3	5	2	2	2	3	4	2	3	6	3	2	2
Ubiquitin carboxyl-terminal hydrolase, family 1 UBIQUITIN CARBOXYL-TERMINAL HYDROLASE	IPR001578	5	3	3	4	2	2	2	4	2	2	5	2	3	3	2	3	2	5	2	2	2	3	3	4
PDZ domain	IPR041517	5	6	4	5	2	3	5	6	3	2	6	2	2	2	3	3	1	2	1	0	3	1	2	2
GATA-type zinc finger domain GATA zinc finger	IPR000679	0	1	2	2	0	9	10	0	6	0	3	8	8	0	11	0	9	0	0	0	3	0	0	0
PAS fold	IPR013767	2	7	7	3	1	1	8	4	1	0	4	0	0	5	0	9	0	0	1	7	0	4	5	0
VILLIN	IPR007122	6	8	10	2	3	1	1	9	1	2	6	0	1	3	1	3	0	4	2	2	2	1	1	1
VIT family FE(2+)/MN(2+) TRANSPORTER PCL1	IPR008217	12	4	6	2	3	2	2	5	2	5	2	2	0	0	1	3	1	4	4	4	1	2	3	1
ApaG domain ApaG domain	IPR007474	3	7	4	4	3	3	3	3	1	1	6	4	1	4	3	2	2	2	2	2	2	3	2	1
Lactonase, 7-bladed beta-propeller	IPR019405	6	5	2	6	2	0	0	4	0	1	25	0	4	3	1	1	0	2	2	1	2	1	2	0
Sigma-70 region 3	IPR007624	5	6	4	5	5	1	1	5	2	1	1	4	3	0	2	1	1	2	0	6	6	2	4	1
Peptidase family C69 SECERNIN	IPR005322	4	6	4	4	3	4	0	6	0	2	15	0	1	2	1	2	0	4	5	1	2	1	1	2
Prefoldin subunit	IPR004127	3	4	2	3	2	2	4	4	2	2	4	5	4	2	2	1	3	4	2	3	4	1	2	4
Tctex-1 family T-COMPLEX-ASSOCIATED-TESTIS-EXPRESSED 1/ DYNEIN LIGHT CHAIN	IPR005334	5	4	4	5	8	2	4	2	2	5	4	1	1	4	4	3	0	4	2	0	0	2	1	5
DNA POLYMERASE TYPE-X FAMILY MEMBER	IPR022312	4	5	5	6	4	4	2	4	2	2	9	0	2	1	2	2	1	2	3	1	3	0	0	6
Peptidase family S49	IPR002142	4	5	4	4	3	3	2	3	3	2	6	2	2	2	1	3	1	2	2	4	1	4	4	0
ADAPTOR COMPLEX SUBUNIT BETA FAMILY MEMBER	IPR026739	3	3	5	3	3	2	2	3	2	3	3	2	2	4	3	3	3	4	3	3	3	1	3	3
Sugar efflux transporter for intercellular exchange	IPR004316	4	5	5	3	3	1	4	6	1	3	4	2	0	5	1	1	1	2	2	3	0	4	5	3
PROTEIN HIGH CHLOROPHYLL FLUORESCENT 107	IPR044624	2	2	4	0	2	2	3	3	2	0	4	5	7	3	2	2	2	1	2	3	10	3	4	1
lactate/malate dehydrogenase, NAD binding domain	IPR001236	2	2	2	2	1	5	5	2	6	2	3	3	5	3	5	2	5	2	1	1	2	2	2	6
JmjN domain jmjN domain	IPR003349	3	6	5	6	0	4	2	7	3	3	3	1	2	8	4	3	0	3	2	1	1	2	1	1
CENPB-type HTH domain	IPR006600	0	0	0	0	0	0	0	1	0	0	2	0	11	24	0	0	1	1	0	0	0	0	1	31
chorismate binding enzyme	IPR015890	2	3	6	2	2	4	2	3	1	3	3	2	3	3	3	4	3	4	2	4	3	1	3	3
TRANSMEMBRANE PROTEIN HTP-1 RELATED Uncharacterized protein family UPF0016	IPR001727	5	2	2	3	1	3	4	5	4	2	2	4	3	2	5	3	4	3	2	2	2	1	2	4
Ligand-gated ion channel	IPR001320	8	14	2	3	5	4	1	0	1	8	5	0	0	8	0	0	0	0	1	1	1	2	2	3
Skp1 family, tetramerisation domain	IPR016073	2	3	0	3	2	2	2	2	2	6	3	2	2	3	2	3	2	2	2	4	2	5	4	8
Queuine tRNA-ribosyltransferase	IPR002616	3	3	3	2	1	3	2	2	2	3	3	4	3	3	4	5	3	3	1	3	3	2	4	3
INITIATION-SPECIFIC ALPHA-1,6-MANNOSYLTRANSFERASE	IPR039367	4	7	7	8	1	1	2	1	1	2	9	2	0	1	1	0	1	0	3	3	1	3	6	5
N-terminal C2 in EEIG1 and EHBP1 proteins C2 NT-type domain	IPR019448	3	9	7	4	0	1	1	10	2	1	6	4	4	1	2	1	1	6	0	0	7	0	0	1
Zinc finger CR-type DnaJ central domain	IPR001305	1	1	1	2	4	3	3	1	3	4	4	6	4	9	2	3	2	2	2	2	3	3	1	3
Isocitrate/isopropylmalate dehydrogenase	IPR024084	5	2	3	2	2	3	4	2	4	4	2	6	5	2	2	2	3	2	1	2	4	2	2	3
MSP (Major sperm protein) domain Major sperm protein (MSP) domain	IPR000535	6	6	4	5	3	2	1	2	2	5	5	3	3	3	2	2	1	2	1	1	3	1	3	4
Transcription factor S-II (TFIIS), central domain TFIIS central domain	IPR003618	3	6	4	5	1	1	3	3	2	2	3	2	1	5	4	4	2	3	1	2	3	2	2	5
Protein of unknown function, DUF547	IPR006869	4	3	2	1	3	1	1	3	1	3	2	4	5	4	2	3	2	1	6	5	5	1	4	3
CUB domain	IPR000859	5	9	13	5	2	0	2	3	1	0	12	0	0	16	0	0	0	0	1	0	0	1	0	1
Zinc finger matrin-type	IPR000690	3	2	6	2	1	2	2	3	3	4	3	2	3	3	3	4	2	2	2	3	3	2	2	5
UNCHARACTERIZED	IPR026170	4	6	2	2	3	0	1	8	1	2	3	1	0	1	2	3	2	4	4	7	1	4	4	2
LETM1-like protein	IPR011685	7	6	5	3	2	2	2	4	2	3	2	3	2	3	2	3	2	2	2	3	2	2	2	2
Permease family	IPR006043	4	2	3	0	2	6	7	1	4	3	9	3	1	4	0	2	0	3	1	4	0	2	1	7
ADP-ribosylglycohydrolase	IPR005502	2	6	2	1	2	6	7	2	1	11	3	0	0	6	0	3	0	0	2	2	0	2	2	10
SMP-30/Gluconolactonase/LRE-like region	IPR013658	5	5	3	1	1	1	0	2	3	5	21	1	0	6	1	1	1	1	1	1	1	0	1	7
PIH1 CS-like domain	IPR041442	8	11	8	9	3	0	3	9	0	2	2	0	0	3	5	0	0	2	2	0	0	1	1	2
Glucosamine-6-phosphate isomerases/6-phosphogluconolactonase	IPR006148	6	8	5	4	3	3	2	7	2	1	5	1	1	2	2	2	2	1	4	1	1	3	2	2
CITRATE SYNTHASE Citrate synthase, C-terminal domain	IPR002020	1	1	3	0	4	5	2	1	3	7	2	6	3	1	3	5	2	1	4	2	5	1	1	6
SAC3/GANP family	IPR005062	1	2	4	3	3	2	2	4	3	4	3	2	4	3	2	4	3	1	2	4	2	3	3	3
SRP54-type protein, helical bundle domain	IPR013822	1	2	1	1	4	3	3	2	3	4	1	4	3	3	4	4	3	1	3	4	4	2	3	4
Phosphatase tensin-type domain	IPR029023	4	9	9	3	4	0	1	7	1	2	3	0	0	19	0	0	0	1	2	1	0	0	2	2
Serine-threonine protein phosphatase N-terminal domain	IPR031675	4	5	6	5	3	2	1	2	1	2	3	1	1	2	1	3	1	2	3	3	2	6	3	3
UNCHARACTERIZED	IPR044294	3	3	1	2	2	1	4	3	1	6	5	1	9	3	2	2	1	3	1	2	3	1	2	5
PP-loop family	IPR011063	2	3	3	1	3	2	2	3	1	5	3	1	2	4	3	3	2	3	4	3	3	3	3	3
Protein of unknown function (DUF3645)	IPR022105	3	12	15	5	4	0	1	9	0	5	3	0	0	1	1	2	1	0	2	1	0	0	1	2
Nitrite/Sulfite reductase ferredoxin-like half domain	IPR005117	10	3	5	1	3	2	3	2	2	3	3	2	2	2	2	2	2	2	2	3	2	3	3	3
SIGNAL PEPTIDASE I	IPR000223	8	6	5	6	2	1	1	5	1	2	6	1	2	2	1	1	1	1	3	2	2	2	3	3
CTLH/CRA C-terminal to LisH motif domain	IPR024964	4	3	4	4	0	5	3	3	6	2	4	6	6	5	0	3	0	3	0	0	5	0	0	4
Signal peptide peptidase SIGNAL PEPTIDE PEPTIDASE	IPR007369	2	5	3	2	3	3	3	5	2	1	2	1	2	4	3	4	3	2	2	2	2	3	5	2
DNA polymerase alpha/epsilon subunit B	IPR007185	3	3	4	2	1	3	3	3	3	3	2	3	3	3	3	2	3	2	3	3	4	2	3	3
Mono-functional DNA-alkylating methyl methanesulfonate N-term	IPR018846	2	2	5	1	2	5	2	3	3	4	3	4	3	6	4	3	3	1	2	2	3	0	2	2
DSBA-like thioredoxin domain	IPR001853	9	8	2	6	3	3	2	4	2	4	5	0	0	5	2	0	1	4	2	2	0	1	2	2
CYSTEINYL-TRNA SYNTHETASE	IPR024909	2	4	7	2	2	2	2	5	2	3	3	4	3	3	2	3	2	1	2	3	2	3	3	2
GrpE grpE protein Protein GrpE [grpE] GRPE PROTEIN	IPR000740	4	5	4	4	1	2	3	4	2	1	6	2	2	2	2	3	2	2	3	3	2	3	3	2
V-type ATPase 116kDa subunit family VACUOLAR PROTON ATPASES	IPR002490	9	3	6	4	2	1	3	3	1	3	4	2	2	3	1	2	1	5	1	1	4	2	1	2
Probable molybdopterin binding domain	IPR001453	2	3	3	1	1	4	4	2	4	2	2	2	3	7	2	2	1	3	2	3	4	4	3	3
SIN3B-RELATED	IPR039774	4	2	7	2	5	2	2	8	1	1	4	1	2	4	2	2	2	1	2	2	2	3	4	3
Glycosyl transferase family 64 domain	IPR015338	2	1	3	2	3	4	1	1	0	2	5	3	2	2	1	2	2	1	1	5	0	3	3	17
Malic enzyme, N-terminal domain	IPR012301	3	2	4	2	4	3	6	1	5	3	2	1	2	7	4	1	5	3	1	2	3	1	1	3
Enolase [eno] ENOLASE	IPR000941	4	3	5	3	4	1	1	3	2	4	5	1	3	6	1	2	1	3	4	3	2	2	2	2
EXS domain EXS family	IPR004342	7	5	2	1	3	1	1	4	1	3	8	0	0	0	3	6	3	4	3	4	1	1	4	1
Uroporphyrinogen decarboxylase (URO-D)	IPR000257	2	3	3	2	3	3	2	3	3	3	4	1	2	3	4	2	4	3	1	3	3	3	4	1
Indole-3-glycerol phosphate synthase	IPR013798	4	3	2	3	2	2	2	3	2	3	3	2	4	6	1	4	1	2	0	4	3	3	4	3
QUERCETIN 2,3-DIOXYGENASE PIRIN-RELATED	IPR012093	5	4	3	3	5	1	2	3	2	5	2	1	3	4	1	1	2	2	1	4	6	2	3	3
Multicopper oxidase	IPR011707	1	4	3	3	4	4	5	3	2	11	12	1	3	1	0	2	0	1	1	1	0	4	1	2
Lecithin:cholesterol acyltransferase	IPR003386	2	3	4	2	4	2	1	1	2	9	7	0	0	2	1	2	1	5	3	2	3	3	3	4
CYTOCHROME B-C1 COMPLEX SUBUNIT RIESKE, MITOCHONDRIAL	IPR014349	2	3	3	3	3	2	2	3	2	2	5	3	2	2	2	8	3	2	2	3	2	2	3	3
DNA-DIRECTED RNA POLYMERASE	IPR012164	3	3	2	3	3	4	3	2	2	2	4	2	3	4	3	3	3	3	1	3	3	2	3	2
50S ribosomal protein L13 [rplM] RIBOSOMAL PROTEIN L13 Ribosomal protein L13	IPR005822	3	3	2	3	2	3	3	3	3	2	5	4	2	4	3	2	3	4	1	2	2	2	2	2
SHR-binding domain of vacuolar-sorting associated protein 13	IPR009543	2	6	9	3	0	1	2	7	2	3	4	1	2	2	0	5	1	0	0	4	2	1	4	4
Guanylate kinase-like domain	IPR008144	3	3	1	3	2	1	4	3	2	2	5	2	2	7	3	4	2	2	1	2	2	3	4	3
Oxidoreductase molybdopterin binding domain	IPR000572	2	3	5	1	4	2	2	2	3	4	4	2	3	2	3	2	3	4	1	2	5	3	2	3
PAC domain	IPR000700	2	4	4	1	4	3	2	6	4	3	5	0	0	5	2	3	2	0	3	4	0	3	5	1
FAD linked oxidases, C-terminal domain	IPR004113	4	4	2	3	2	2	3	3	2	6	2	2	2	4	3	2	3	1	2	3	2	2	3	4
TESMIN/TSO1-RELATED	IPR028307	3	4	3	3	1	3	3	2	3	0	4	3	2	6	1	4	2	3	2	5	1	1	5	0
Obg domain GTP1/OBG	IPR006169	3	4	5	3	1	2	2	4	2	4	3	2	2	2	3	3	3	3	1	3	2	1	2	5
Putative 2OG-Fe(II) oxygenase	IPR012668	8	9	6	6	7	0	0	12	0	6	4	0	1	0	1	0	2	1	1	1	0	2	1	0
PQQ-like domain	IPR002372	2	8	2	2	6	2	11	5	1	2	10	0	0	7	3	2	0	1	0	1	0	0	0	1
Linker histone H1/H5 globular (H15) domain linker histone H1 and H5 family	IPR005818	4	4	3	3	0	1	4	1	3	1	1	1	1	0	2	2	0	3	1	4	1	17	4	5
L-GULONOLACTONE OXIDASE	IPR010031	6	2	3	6	1	3	2	1	4	5	7	1	2	2	2	8	2	3	1	1	1	2	1	2
BEACH-type PH domain PH domain associated with Beige/BEACH	IPR023362	3	6	11	1	3	1	1	8	1	1	2	3	1	4	2	5	3	1	1	4	2	2	1	1
CELL DIVISION PROTEIN FTSZ-RELATED	IPR045061	7	7	9	5	2	1	3	5	2	0	5	2	0	0	2	3	2	3	2	3	0	2	4	0
HORMA domain HORMA domain	IPR003511	1	3	5	3	3	3	1	4	2	4	4	2	3	4	2	3	2	3	1	2	3	2	3	4
Translation initiation factor 1A / IF-1 S1 domain IF1 type	IPR006196	5	3	1	4	2	2	3	3	2	2	3	4	3	3	2	3	2	3	3	2	3	3	2	2
NADH DEHYDROGENASE	IPR045024	3	0	5	2	1	5	3	2	4	3	4	2	1	3	2	3	1	1	3	3	3	4	4	5
ER lumen protein retaining receptor ER LUMEN PROTEIN RETAINING RECEPTOR	IPR000133	5	4	1	3	3	2	2	2	2	9	4	1	1	3	1	3	2	3	2	2	1	1	2	8
DNA POLYMERASE I	IPR002298	3	2	3	2	1	5	3	3	2	4	5	0	2	5	3	4	3	4	2	1	2	2	2	5
DNA-DIRECTED RNA POLYMERASE II, III	IPR045113	1	3	3	3	2	3	3	3	3	3	2	4	3	2	3	3	3	3	1	3	3	3	2	3
TRANSAMIDASE	IPR000120	2	7	3	2	4	2	2	1	5	4	9	2	2	1	2	4	2	1	1	3	1	2	1	2
Divalent cation transporter	IPR006667	9	7	3	6	0	2	2	4	0	3	6	2	0	1	2	1	0	1	3	4	3	1	2	2
WHEP-TRS domain WHEP-TRS domain	IPR000738	6	5	2	3	0	1	1	5	0	1	7	0	0	3	6	5	2	3	4	3	0	5	3	1
Atypical Arm repeat	IPR032413	5	3	2	3	2	1	1	4	1	2	3	3	1	1	1	1	1	2	2	2	2	1	2	19
Phosphoglucomutase/phosphomannomutase, alpha/beta/alpha domain II	IPR005845	2	4	5	3	2	3	3	2	4	3	3	2	3	2	2	3	2	1	0	4	4	2	3	2
Circularly permuted (CP)-type guanine nucleotide-binding (G) domain	IPR030378	1	3	5	1	1	3	4	2	3	3	2	4	5	4	4	2	4	2	2	2	3	2	2	3
Integral membrane protein TerC family	IPR005496	8	6	3	5	3	1	1	4	1	3	6	1	2	2	2	2	2	4	3	1	2	1	1	3
Phytochelatin synthase Phytochelatin synthase (PCS) domain	IPR007719	6	5	2	4	3	1	2	3	1	4	9	0	1	2	1	2	0	3	3	3	1	2	3	3
BAH domain BAH domain	IPR001025	2	4	3	3	1	8	3	4	3	0	3	1	3	13	3	1	3	2	0	2	1	3	1	0
Williams-Beuren syndrome DDT (WSD), D-TOX E motif	IPR028941	6	3	11	3	1	4	3	5	4	1	3	1	1	5	2	1	2	1	1	2	1	2	0	3
Fumarylacetoacetate (FAA) hydrolase family	IPR011234	2	6	2	5	4	1	2	5	2	3	5	3	1	2	2	2	1	5	2	2	1	3	3	2
GRF zinc finger	IPR010666	3	8	5	6	0	2	2	6	1	4	3	1	3	2	2	3	2	1	4	2	1	2	1	3
ASPARTATE AMINOTRANSFERASE	IPR000796	5	3	3	3	4	2	3	3	3	1	5	2	2	5	1	2	1	2	2	2	2	3	2	4
VIOLAXANTHIN DE-EPOXIDASE, CHLOROPLASTIC-RELATED	IPR044682	4	4	3	1	3	2	1	4	2	4	4	0	0	1	2	4	2	4	3	4	0	3	4	4
GLYCERALDEHYDE 3-PHOSPHATE DEHYDROGENASE	IPR020831	4	3	0	5	3	2	1	4	2	3	4	1	1	3	2	4	0	3	1	5	1	3	4	3
ADENOSINE DEAMINASE	IPR006330	3	10	2	2	0	3	2	3	2	2	9	0	2	1	1	1	1	2	1	2	1	2	2	10
STI1 domain	IPR041243	2	6	4	1	1	1	4	4	4	2	2	1	1	4	5	2	4	3	2	3	1	4	1	3
DNA polymerase family A	IPR001098	3	2	3	2	1	5	2	3	2	5	4	1	1	5	3	4	3	3	2	1	2	1	2	6
DUF218 domain	IPR003848	8	7	5	6	1	1	2	5	1	1	9	1	2	3	2	0	1	4	1	1	1	1	1	2
Calpain large subunit, domain III	IPR022682	6	12	10	9	0	0	1	7	0	3	6	0	0	4	0	1	0	1	2	0	0	0	1	3
Thioesterase domain	IPR001031	3	7	5	4	4	2	3	3	2	3	7	0	0	0	3	6	2	4	4	0	0	0	0	5
Mitochondrial branched-chain alpha-ketoacid dehydrogenase kinase	IPR018955	4	2	3	1	1	2	3	5	2	5	3	2	1	5	1	3	1	2	2	4	2	2	2	7
TENASCIN	IPR033078	15	15	16	5	0	0	0	12	0	0	0	0	0	4	0	0	0	0	0	0	0	0	0	0
SBP domain Zinc finger SBP-type	IPR004333	0	0	0	0	0	36	23	0	4	0	0	0	0	0	3	0	1	0	0	0	0	0	0	0
Common central domain of tyrosinase	IPR002227	1	2	2	1	31	1	1	1	0	5	10	1	3	0	0	1	0	0	4	0	0	0	0	1
Iron-sulphur cluster biosynthesis	IPR000361	3	3	2	2	3	3	3	2	3	2	2	3	2	3	2	3	2	3	1	3	4	3	3	3
ENHANCED DISEASE RESISTANCE-RELATED	IPR045096	4	7	5	3	3	2	3	1	2	0	6	0	0	2	1	4	1	2	1	6	0	5	3	0
DM10 domain DUF1126 PH-like domain	IPR006602	4	4	2	3	7	1	3	3	2	4	3	0	0	7	4	1	3	4	5	0	0	1	2	3
Enolase, C-terminal TIM barrel domain	IPR020810	4	3	5	3	4	1	1	3	2	3	5	1	3	4	1	2	1	3	4	3	2	1	2	2
RRNA METHYLASE-LIKE tRNA (guanosine(18)-2'-O)-methyltransferase [trmH]	IPR033671	7	5	3	4	1	1	2	6	1	2	8	1	2	3	2	1	2	1	1	2	3	3	2	1
WSC domain WSC domain	IPR002889	2	6	7	4	1	0	15	3	0	15	1	0	0	0	1	3	0	2	0	0	0	2	2	2
tRNA synthetases class I (E and Q), anti-codon binding domain	IPR020059	2	3	4	2	3	2	2	3	2	3	4	2	2	3	2	2	2	3	3	3	3	3	3	2
NUCLEOTIDE-BINDING PROTEIN NBP35 YEAST -RELATED	IPR019591	4	2	2	2	1	3	2	3	3	3	3	3	2	5	3	2	3	1	2	4	3	2	2	3
LMBR1-like membrane protein	IPR006876	4	6	6	4	2	3	2	3	3	3	2	1	0	3	2	3	3	2	2	1	1	4	2	3
Uncharacterised ACR, YagE family COG1723	IPR003734	2	4	2	1	1	5	5	3	2	5	3	3	2	4	1	2	1	4	3	1	4	1	2	4
Ribosomal protein L4/L1 family	IPR002136	3	3	2	4	3	3	3	3	2	2	4	3	2	3	3	2	3	3	2	3	2	2	2	2
COPINE	IPR045052	1	3	0	0	0	2	2	0	1	1	0	1	12	9	0	1	0	0	0	9	14	3	3	1
P-loop containing NTP hydrolase pore-1	IPR039187	2	5	3	4	3	4	1	6	4	2	6	0	0	3	1	2	2	3	3	0	0	4	1	6
50S ribosomal protein L15 [rplO]	IPR030878	3	2	1	2	2	3	3	1	3	2	3	3	3	3	3	3	4	2	2	3	4	2	3	2
CLASP N terminal	IPR024395	2	5	7	4	1	3	1	5	1	2	2	5	1	7	3	1	2	2	1	1	3	0	2	3
Homoserine dehydrogenase, NAD binding domain	IPR005106	5	4	5	4	4	0	2	4	2	1	4	1	1	2	2	2	2	1	2	3	2	4	3	1
Guanine nucleotide exchange factor in Golgi transport N-terminal	IPR032691	1	3	4	3	2	1	3	2	3	3	2	1	2	6	3	2	3	1	1	3	3	3	3	3
ARSENITE METHYLTRANSFERASE	IPR026669	4	3	0	2	1	3	3	3	2	3	2	3	2	3	3	3	2	3	1	2	2	2	6	3
Methyltransferase domain	IPR013217	3	3	3	2	0	0	2	3	7	5	11	3	0	1	2	1	0	1	4	2	0	1	3	8
Enolase, N-terminal domain	IPR020811	4	3	5	3	4	1	1	3	2	4	3	1	3	5	1	2	1	2	4	3	2	2	2	2
Polyketide cyclase / dehydrase and lipid transport	IPR019587	13	6	5	6	3	1	2	5	3	0	3	0	4	5	0	1	0	1	1	0	2	1	0	1
NADPH-dependent FMN reductase	IPR005025	2	5	0	1	4	1	4	0	4	2	7	8	1	1	0	1	1	2	2	3	4	3	2	2
CoA-ligase	IPR005811	2	2	2	1	4	3	2	2	3	5	3	3	3	2	2	3	2	2	2	3	3	1	2	4
Las17-binding protein actin regulator	IPR007461	2	2	2	2	5	9	5	3	4	0	3	0	0	0	0	2	1	1	1	4	10	2	3	0
THREONINE-TRNA LIGASE	IPR002320	4	2	4	3	3	2	2	2	2	2	10	2	2	3	2	2	2	3	2	2	2	1	2	2
FMN-LINKED OXIDOREDUCTASES SUPERFAMILY PROTEIN	IPR004653	5	4	2	3	3	1	1	4	1	2	3	1	1	3	2	2	2	2	4	5	1	3	2	3
Globin family Globin	IPR000971	5	2	2	2	1	0	0	1	0	10	6	1	2	7	2	2	0	1	1	3	6	4	1	2
14-3-3 protein	IPR023410	4	5	4	3	2	1	2	3	1	5	4	3	2	3	2	1	3	2	3	1	1	2	1	5
TRANSMEMBRANE PROTEIN 144	IPR010651	9	7	11	4	1	1	0	3	1	1	10	0	0	1	0	1	0	1	0	4	0	3	2	2
AAA lid domain	IPR041627	9	5	3	4	3	0	2	7	0	6	5	2	1	2	1	1	0	1	2	1	3	3	2	0
RIBONUCLEOSIDE-DIPHOSPHATE REDUCTASE LARGE CHAIN	IPR039718	3	3	5	3	8	1	1	3	1	3	4	2	1	2	1	2	1	6	1	3	1	2	2	2
Transposase IS4	IPR029526	0	0	1	1	0	0	0	0	0	0	7	0	0	11	1	0	0	0	0	24	0	6	5	0
Haem-binding uptake, Tiki superfamily, ChaN	IPR007314	4	5	3	2	2	0	1	5	1	4	7	1	2	2	0	2	0	1	4	2	3	1	3	3
FtsZ family, C-terminal domain	IPR024757	7	6	8	5	2	1	2	4	1	0	5	2	0	0	2	3	2	3	2	3	0	2	4	0
Glycosyl hydrolases family 2	IPR006102	8	8	15	5	4	0	0	4	6	0	2	1	0	4	1	1	1	0	0	2	1	0	0	1
Transglutaminase-like superfamily	IPR002931	3	5	5	5	2	1	1	6	1	2	4	0	2	2	1	0	1	3	2	4	1	3	3	4
TYROSYL-DNA PHOSPHODIESTERASE 1 Tyrosyl-DNA phosphodiesterase	IPR010347	4	5	3	2	4	5	0	5	1	2	8	1	1	1	1	1	0	2	2	2	1	2	1	8
Formyl transferase	IPR002376	2	2	2	1	5	3	4	1	3	4	3	2	2	1	2	3	2	1	4	4	2	1	3	4
THIOSULFATE SULFURTRANSFERASE/RHODANESE-LIKE DOMAIN-CONTAINING PROTEIN 2	IPR020936	2	4	3	1	4	2	2	2	2	1	3	0	1	1	3	0	3	0	5	6	0	5	6	0
FAMILY NOT NAMED	IPR045033	2	5	5	2	2	0	0	1	1	3	7	1	4	1	2	4	2	3	3	2	2	3	2	6
PITH domain PITH domain	IPR010400	4	5	3	4	3	2	2	3	2	4	4	1	1	3	2	2	2	2	2	2	1	3	1	4
Clathrin heavy-chain (CHCR) repeat Region in Clathrin and VPS	IPR000547	4	2	3	2	1	4	2	2	5	1	3	4	3	5	1	1	3	5	1	1	4	1	1	4
HELP motif	IPR005108	2	6	9	3	5	0	2	4	0	1	2	0	0	9	7	0	1	4	4	0	0	1	1	3
BRO1-like domain	IPR004328	3	6	5	3	1	1	0	7	2	2	10	3	1	3	2	2	2	1	0	3	1	1	0	2
PERIPHERAL-TYPE BENZODIAZEPINE RECEPTOR TspO/MBR family	IPR004307	4	4	2	3	3	2	1	4	4	0	4	2	2	1	1	2	1	3	1	3	4	3	3	3
PROLYL-TRNA SYNTHETASE	IPR004499	5	3	4	2	2	5	3	4	2	1	3	2	2	3	2	2	2	2	2	2	3	2	2	1
Sulfatase-modifying factor enzyme 1	IPR005532	5	7	6	3	4	1	1	5	0	4	7	1	1	1	0	1	1	3	2	2	1	2	2	1
TNFR/NGFR family cysteine-rich region domain TNFR/NGFR family cysteine-rich region	IPR001368	1	3	2	5	1	3	0	5	0	2	3	1	0	37	0	0	0	0	0	0	0	0	0	0
CoA binding domain	IPR003781	2	3	2	2	4	2	3	2	2	3	5	1	1	3	2	3	1	2	1	3	3	1	3	5
Ribosomal RNA large subunit methyltransferase E [rlmE]	IPR015507	2	2	4	2	4	3	3	2	3	1	3	3	0	4	3	2	2	3	2	2	3	2	3	3
TsaA-like domain tRNA-methyltransferase O	IPR023370	4	7	4	4	3	1	1	3	1	4	7	0	2	4	1	1	2	2	2	1	1	1	2	3
Male sterility protein	IPR013120	0	3	5	0	2	0	1	2	6	11	5	0	0	3	0	3	0	0	0	2	0	2	1	15
3-beta hydroxysteroid dehydrogenase/isomerase family	IPR002225	2	3	5	1	1	2	5	4	1	4	3	3	1	2	1	2	1	5	1	3	4	2	1	4
CBF/Mak21 family	IPR005612	4	3	3	2	0	2	1	3	3	2	3	2	3	2	3	3	3	2	3	3	3	2	3	2
ION CHANNEL POLLUX-RELATED	IPR044849	3	5	3	3	9	4	3	1	5	0	2	0	2	7	2	0	1	3	3	0	3	1	1	2
UNCHARACTERIZED	IPR040372	4	7	4	4	3	1	1	3	1	4	7	0	2	4	1	1	2	2	2	1	1	1	2	3
TRANSMEMBRANE PROTEIN 65 Transmembrane protein 65	IPR019537	5	3	4	2	4	1	1	2	0	4	10	0	0	4	2	0	1	2	2	3	1	2	3	5
Triosephosphate isomerase [tpiA]	IPR022896	3	2	1	2	5	2	1	1	2	2	1	1	1	2	3	3	4	3	3	4	2	3	4	2
Methionine aminopeptidase [map]	IPR002467	3	2	2	1	4	2	2	2	2	4	2	2	2	3	3	3	3	1	3	3	2	2	4	3
SAM-dependent methyltransferase TRM5/TYW2-type domain Met-10+ like-protein	IPR030382	3	3	4	3	2	1	1	3	2	3	3	2	1	3	3	3	2	1	3	4	1	3	4	2
SacI homology domain Sac phosphatase domain	IPR002013	2	2	3	2	2	3	3	3	3	4	3	2	2	6	1	4	1	4	1	2	1	2	1	4
Heme oxygenase	IPR016053	6	4	3	3	2	3	1	4	2	1	5	2	1	3	2	2	1	2	2	4	3	2	2	1
Histone acetylation protein CBP/P300-RELATED	IPR013178	4	7	6	3	4	1	3	4	1	0	2	0	0	6	1	1	1	4	1	4	0	2	4	0
14-3-3 PROTEIN	IPR000308	4	4	4	3	2	1	2	3	1	4	4	3	2	3	2	1	3	2	3	1	1	1	1	5
TRANSMEMBRANE PROTEIN AI-2E family transporter	IPR002549	10	3	5	8	1	2	1	8	2	1	7	1	1	3	2	2	1	1	0	0	2	0	0	1
Putative esterase	IPR000801	5	3	3	2	3	2	2	3	1	3	9	2	1	3	2	1	2	2	1	2	1	3	2	1
ELECTRON TRANSPORT OXIDOREDUCTASE	IPR012258	4	4	3	4	2	4	4	2	4	2	2	3	2	1	3	4	2	2	1	1	3	1	1	2
tRNA synthetases class I (C) catalytic domain	IPR032678	2	3	3	1	2	1	2	2	2	3	3	4	3	3	2	3	2	1	2	3	2	5	3	2
AD039 HT014 THIOREDOXIN FAMILY TRP26	IPR045099	4	5	3	4	3	2	2	3	2	4	4	1	1	3	2	2	2	2	2	1	1	2	1	4
UBIQUITIN-PROTEIN LIGASE E3C	IPR044611	4	4	3	1	2	2	2	2	2	2	7	1	1	5	2	1	5	3	1	2	1	2	2	1
KIAA1430 homologue	IPR029488	5	7	5	7	3	1	1	8	0	6	0	0	0	2	1	1	0	5	4	0	0	1	0	5
Histone-binding protein RBBP4 or subunit C of CAF1 complex	IPR022052	3	2	2	2	4	3	2	2	3	3	3	2	3	7	3	2	3	1	2	2	2	0	2	2
UDP-glucose/GDP-mannose dehydrogenase family, NAD binding domain	IPR001732	3	3	4	3	1	1	3	4	2	2	3	6	2	5	1	1	5	3	1	1	2	2	2	1
Serine acetyltransferase, N-terminal	IPR010493	3	5	4	5	4	2	2	1	2	2	4	2	2	1	3	2	3	1	3	2	3	1	3	0
LEISHMANOLYSIN-LIKE PEPTIDASE Leishmanolysin	IPR001577	5	7	4	6	0	0	2	4	0	1	4	0	0	1	0	2	0	2	0	2	1	5	9	5
UNCHARACTERIZED	IPR039262	6	5	4	5	0	1	2	3	1	3	2	0	2	5	2	2	1	1	3	4	0	3	1	1
Gamma-glutamyl cyclotransferase, AIG2-like	IPR009288	4	4	3	4	1	2	1	4	1	4	4	4	3	2	3	0	1	1	1	4	3	1	1	3
Pherophorin	IPR024616	0	0	0	0	0	0	61	0	0	0	0	0	0	0	0	0	0	0	0	0	0	0	0	0
Guanylate kinase	IPR008145	3	3	1	3	1	1	4	3	2	1	5	2	2	7	3	3	1	2	0	2	2	3	3	2
TruB family pseudouridylate synthase (N terminal domain)	IPR002501	2	1	0	2	3	2	3	2	2	3	2	3	1	2	2	2	2	2	1	2	14	2	2	2
tRNA (Guanine-1)-methyltransferase	IPR016009	6	5	7	4	1	1	2	5	1	2	3	0	1	2	3	4	2	2	1	2	1	1	1	2
Domain found in IF2B/IF5	IPR002735	4	4	4	2	2	2	2	2	2	4	3	2	2	3	2	2	2	2	2	3	2	2	2	2
Semialdehyde dehydrogenase, NAD binding domain	IPR000534	4	3	1	4	3	2	2	2	2	3	2	2	2	2	3	4	2	3	1	2	2	4	2	2
MEMBRANE BOUND PREDICTED REDOX MODULATOR	IPR022369	6	5	2	5	3	1	1	3	1	3	5	1	2	2	1	2	2	4	3	1	2	1	1	3
SUGAR HYDROLASE-RELATED	IPR044993	4	9	12	4	5	5	0	6	0	2	5	0	0	0	0	1	0	0	3	1	0	0	0	3
Protein of unknown function (DUF1279)	IPR009688	4	4	4	4	1	2	2	3	1	2	5	0	1	3	1	2	1	2	2	3	2	2	3	3
Aminoacyl-tRNA editing domain	IPR007214	4	5	2	3	2	3	3	4	0	3	3	0	0	4	2	1	0	5	3	2	0	2	1	6
Ice-binding-like	IPR021884	20	0	0	0	0	0	0	0	0	0	0	0	0	0	0	0	0	38	3	0	0	0	0	0
MAM domain MAM domain, meprin/A5/mu	IPR000998	3	9	2	9	1	0	0	2	0	2	27	0	0	0	0	0	0	2	0	0	0	0	0	4
Pirin C-terminal cupin domain	IPR008778	5	4	4	3	5	1	1	4	1	3	3	1	2	2	2	1	2	1	2	2	3	3	2	2
Pyrroline-5-carboxylate reductase [proC] PYRROLINE-5-CARBOXYLATE REDUCTASE	IPR000304	3	4	2	3	3	2	1	3	2	1	5	2	2	4	2	2	1	2	2	3	2	3	3	1
Signal peptide binding domain	IPR004125	3	3	2	2	2	3	2	3	2	3	4	2	3	3	2	3	2	2	3	2	2	2	2	2
Homocysteine S-methyltransferase	IPR003726	3	2	4	7	1	4	2	1	1	4	5	1	2	4	1	2	1	3	0	4	4	1	1	1
5'-nucleotidase, C-terminal domain	IPR008334	3	5	2	3	4	5	3	5	0	3	4	0	2	3	2	0	1	1	1	4	1	4	3	1
Histone chaperone Rttp106-like	IPR013719	2	2	3	3	3	1	2	2	2	2	3	2	2	1	3	2	3	2	3	3	4	3	3	2
Poly(A)-binding protein C-terminal (PABC) domain Poly-adenylate binding protein, unique domain	IPR002004	6	6	2	7	2	1	1	10	2	1	6	1	1	2	1	1	1	1	0	1	1	1	1	3
EF-HAND DOMAIN C-TERMINAL CONTAINING PROTEIN	IPR040193	4	3	3	2	5	1	3	2	2	4	2	0	0	7	4	1	2	4	5	0	0	2	1	3
Protein prenyltransferases alpha subunit repeat	IPR002088	2	3	2	2	2	2	2	3	2	2	3	5	2	1	2	3	3	2	2	3	2	3	3	2
Eukaryotic translation initiation factor eIF2A	IPR013979	2	2	3	2	3	1	2	2	2	4	4	4	2	4	3	3	2	0	1	3	2	1	2	3
Protein of unknown function (DUF1997)	IPR018971	5	5	2	3	1	3	3	2	1	2	3	1	0	2	4	5	4	2	1	1	1	2	2	4
Yip1 domain	IPR006977	4	2	4	2	2	2	2	3	2	4	2	2	1	4	2	3	2	2	1	2	5	0	1	3
60S RIBOSOMAL PROTEIN L12 50S ribosomal protein L11 [rplK]	IPR000911	3	3	1	3	3	2	3	3	3	2	3	3	2	3	3	1	3	3	1	2	2	2	2	2
BETA-CAROTENE ISOMERASE D27	IPR038938	2	3	2	3	1	3	2	2	3	3	2	1	2	2	5	4	4	4	2	2	1	1	2	2
CAF1 family ribonuclease	IPR006941	1	2	2	2	1	2	2	2	2	5	3	3	3	3	2	3	2	1	2	2	4	2	2	5
RanBP1 domain Ran binding domain type 1	IPR000156	3	1	3	2	2	3	1	1	2	2	2	2	2	4	3	3	3	2	3	3	2	2	4	2
MutS family domain IV	IPR007861	2	4	1	2	1	1	0	2	3	2	2	7	5	3	2	6	2	1	2	3	4	1	1	2
INWARD RECTIFIER POTASSIUM CHANNEL	IPR016449	2	2	3	0	1	3	2	3	3	0	3	0	0	0	5	2	0	1	3	5	0	8	5	3
PRENYLATED RAB ACCEPTOR 1-RELATED PRA1 family protein	IPR004895	5	4	3	3	0	1	2	3	2	2	1	4	6	1	4	1	3	1	0	2	6	1	1	2
Protein of unknown function (DUF933)	IPR013029	4	3	1	1	3	2	3	3	2	3	2	2	2	3	3	1	3	1	1	3	2	2	3	3
Ribonucleotide reductase, barrel domain	IPR000788	3	3	5	3	7	1	1	3	1	3	3	2	1	2	1	2	1	5	1	3	1	2	2	2
Prenyltransferase and squalene oxidase repeat	IPR001330	3	3	3	1	3	2	2	2	2	3	4	2	2	2	2	1	2	4	2	3	2	1	3	3
Natural resistance-associated macrophage protein SOLUTE CARRIER PROTEIN FAMILY 11 MEMBER	IPR001046	7	5	3	3	3	1	4	3	2	2	4	4	2	4	1	2	2	1	1	0	2	1	1	1
CSN8/PSMD8/EIF3K family	IPR033464	3	3	2	3	3	2	3	3	2	2	3	3	2	3	2	4	2	3	3	1	2	0	1	3
Phosphomethylpyrimidine kinase	IPR013749	3	2	2	4	3	2	1	4	2	2	6	3	2	2	2	2	1	2	3	2	3	1	2	2
3-dehydroquinate synthase	IPR030960	7	4	3	2	4	1	1	2	2	2	3	1	3	1	1	2	1	3	2	2	5	2	2	2
Domain of unknown function (DUF4033)	IPR025114	2	3	2	3	1	3	2	3	3	3	1	1	2	2	5	4	4	4	2	2	1	1	2	2
UDP-GLUCOSE DEHYDROGENASE/UDP-MANNAC DEHYDROGENASE	IPR028356	4	4	4	3	1	1	3	6	2	1	3	5	1	4	1	1	5	2	1	1	1	3	1	1
CCT domain CCT motif	IPR010402	0	0	0	0	1	4	8	0	5	0	0	7	8	0	3	2	5	0	1	3	4	2	3	0
CCR4 NOT-RELATED	IPR040168	3	2	3	2	2	2	2	2	3	3	3	3	2	2	2	3	2	3	2	2	2	1	2	4
SERYL-TRNA SYNTHETASE	IPR002317	3	3	1	3	2	2	2	3	2	4	3	2	2	3	2	2	2	4	2	2	2	2	2	2
Dip2/Utp12 Family	IPR007148	3	3	2	1	1	2	3	3	3	1	1	2	3	3	3	3	2	3	3	3	3	1	2	4
Intein N-terminal splicing motif	IPR006141	2	3	0	2	0	1	0	9	0	7	2	2	16	2	0	0	0	3	0	1	9	0	0	0
CBP/p300-type histone acetyltransferase (HAT) domain	IPR031162	4	7	6	4	3	1	1	4	1	0	3	0	0	6	1	1	1	5	1	4	0	1	3	0
UbiE family SAM-binding methyltransferase Ubiquinone/menaquinone biosynthesis C-methyltransferase UbiE [ubiE] ubiE/COQ5 methyltransferase family	IPR004033	2	2	1	1	2	2	3	2	2	2	2	2	5	4	4	3	3	1	2	2	2	2	2	4
Type-2 KH domain KH domain	IPR004044	2	2	1	2	2	2	1	1	3	2	3	4	3	3	3	2	4	2	1	2	2	2	3	3
SBF-like CPA transporter family (DUF4137) SOLUTE CARRIER FAMILY 10 MEMBER 7	IPR016833	3	4	3	1	5	3	6	2	4	1	2	0	0	2	1	0	2	2	2	4	0	2	3	4
Calreticulin family CALRETICULIN AND CALNEXIN	IPR001580	4	5	4	6	3	2	2	2	2	1	6	1	1	2	2	2	1	2	2	1	3	1	1	2
GLUTATHIONE GAMMA-GLUTAMYLCYSTEINYLTRANSFERASE	IPR040409	5	4	2	4	3	1	2	2	1	2	6	0	1	2	1	2	0	3	3	3	1	2	3	3
IRON-SULFUR PROTEIN NUBPL	IPR044304	4	3	1	3	3	2	1	3	2	2	4	2	1	2	2	2	2	3	3	3	2	2	2	2
Ribosomal protein L11, RNA binding domain	IPR020783	3	3	1	3	3	2	3	3	3	1	3	3	2	3	3	1	3	3	1	2	2	2	2	2
SQUAMOSA PROMOTER-BINDING-LIKE PROTEIN 4	IPR044817	0	0	0	0	0	28	25	0	4	0	0	0	0	0	2	0	0	0	0	0	0	0	0	0
Starch synthase catalytic domain	IPR013534	0	1	2	0	0	6	9	1	8	1	0	1	1	6	9	0	7	0	0	0	2	0	0	5
COPROPORPHYRINOGEN III OXIDASE, MITOCHONDRIAL Coproporphyrinogen III oxidase	IPR001260	2	3	1	3	4	3	2	2	2	2	2	3	2	3	2	2	2	2	2	3	2	2	2	4
Nitroreductase family	IPR029479	3	3	5	2	3	0	1	3	1	4	5	0	0	0	1	2	0	3	0	3	0	7	4	3
MYST-type histone acetyltransferase (HAT) domain MOZ/SAS family	IPR002717	3	3	3	3	3	1	2	3	2	2	3	1	2	3	3	2	3	2	2	2	2	2	2	3
Formate/nitrite transporter FORMATE TRANSPORTER-RELATED	IPR000292	2	3	3	1	4	3	6	9	2	2	4	0	1	1	1	2	1	7	1	1	1	1	1	1
NET domain Bromodomain extra-terminal - transcription regulation	IPR027353	5	6	4	3	1	1	3	3	3	1	5	1	3	1	1	2	0	3	2	2	3	2	2	0
3-hydroxyacyl-CoA dehydrogenase, C-terminal domain	IPR006108	3	3	2	3	4	2	2	3	2	1	6	2	1	2	1	3	1	0	2	3	2	3	3	2
Rhodanase C-terminal	IPR022111	2	1	3	1	4	1	1	1	2	1	3	0	2	2	3	1	2	0	4	7	1	4	5	1
ATP-DEPENDENT CLP PROTEASE ADAPTER PROTEIN CLPS1, CHLOROPLASTIC	IPR022935	3	3	1	3	1	2	2	1	2	1	2	2	4	4	0	3	0	2	2	3	3	3	7	2
VAD1 Analog of StAR-related lipid transfer domain VASt domain	IPR031968	2	5	3	1	0	4	4	0	2	0	0	3	1	1	2	3	1	2	1	5	1	4	7	2
Uncharacterized protein family UPF0029	IPR001498	3	4	4	2	4	2	2	4	1	4	5	2	2	2	3	2	2	2	0	2	2	0	2	1
RING-H2 zinc finger domain	IPR024766	3	4	1	2	1	5	2	4	2	7	2	3	2	1	1	1	2	1	0	2	3	3	1	3
Mo-co oxidoreductase dimerisation domain	IPR005066	2	3	4	0	4	2	2	2	3	4	2	1	3	1	2	2	2	1	1	2	5	3	2	4
PROTEIN TRANSPORT PROTEIN SEC23	IPR037364	3	4	7	4	1	1	2	3	2	3	5	1	2	2	3	2	2	3	1	2	1	1	1	1
Glycosyl hydrolase family 20, catalytic domain	IPR015883	3	8	5	5	7	3	0	5	2	1	6	0	0	4	0	0	0	0	3	2	0	2	0	0
Ribosomal protein L11, N-terminal domain	IPR020784	3	3	1	3	3	2	3	3	3	2	2	3	2	3	3	1	3	3	1	2	2	2	2	2
Domain of unknown function (DUF4116)	IPR025197	15	3	1	3	4	0	0	4	0	1	2	0	0	7	0	0	0	0	1	1	0	3	0	0
CLEFT LIP AND PALATE ASSOCIATED TRANSMEMBRANE PROTEIN-RELATED Cleft lip and palate transmembrane protein 1 (CLPTM1)	IPR008429	3	3	2	2	3	1	1	3	1	1	9	1	1	3	2	2	1	7	3	1	1	2	2	2
Alanine racemase, N-terminal domain	IPR001608	4	3	1	5	4	1	1	3	3	3	6	1	1	4	2	1	1	2	2	2	1	1	3	2
tRNA synthetases class II (A)	IPR018164	3	6	2	3	2	1	2	3	2	4	5	1	2	1	3	2	2	2	1	2	2	2	2	2
RNA POLYMERASE II CTD PHOSPHATASE	IPR039189	3	4	5	3	0	3	4	5	3	3	4	1	1	1	3	0	3	6	1	1	1	0	1	2
Pex2 / Pex12 amino terminal region	IPR006845	3	3	2	3	0	3	2	2	3	3	5	5	1	3	3	2	4	3	0	0	3	1	0	3
GERANYLGERANYL TRANSFERASE TYPE BETA SUBUNIT	IPR045089	3	3	3	1	3	2	2	2	2	3	3	2	2	2	2	1	2	4	2	3	2	1	3	3
TRNA/RRNA METHYLTRANSFERASE	IPR004384	4	4	4	4	0	2	4	5	0	3	3	1	1	4	5	1	4	1	2	0	0	2	2	1
MOSC N-terminal beta barrel domain	IPR005303	2	7	3	1	1	2	2	3	3	1	7	2	2	2	1	2	1	1	3	2	2	3	2	2
Endoribonuclease YbeY [ybeY] Uncharacterized protein family UPF0054 ENDORIBONUCLEASE YBEY, CHLOROPLASTIC	IPR002036	1	2	2	3	3	3	2	3	2	2	2	3	4	4	2	2	2	3	1	2	3	1	2	2
DegT/DnrJ/EryC1/StrS aminotransferase family TRANSAMINASE	IPR000653	9	5	3	5	3	0	0	3	0	4	2	0	1	3	3	3	1	1	1	3	1	2	1	2
Enoyl-CoA hydratase/isomerase	IPR045004	1	4	2	3	3	1	1	3	2	2	7	1	2	3	1	4	1	3	1	3	1	3	2	2
SECA INNER MEMBRANE COMPONENT OF SEC PROTEIN SECRETION SYSTEM	IPR000185	6	4	4	2	2	3	3	4	2	2	2	2	2	5	2	1	2	1	0	1	1	2	1	1
tRNA synthetases class II core domain (F)	IPR002319	3	2	1	2	1	2	2	2	2	4	3	2	3	3	2	2	2	2	2	3	3	2	3	3
RmlD substrate binding domain	IPR029903	2	4	3	2	4	3	2	3	2	1	4	1	1	2	2	3	2	3	1	3	1	3	4	0
GLUTATHIONYL-HYDROQUINONE REDUCTASE	IPR016639	2	2	2	2	3	2	2	0	2	3	1	3	2	5	2	2	1	2	2	4	2	2	4	3
Bacterial extracellular solute-binding proteins, family 3	IPR001638	4	5	4	2	2	8	3	1	1	5	3	0	0	3	1	0	0	0	1	1	3	3	2	6
PWI domain PWI domain	IPR002483	4	5	3	4	1	2	2	4	2	2	5	2	0	2	5	2	1	1	1	1	0	1	4	2
Aconitase family (aconitate hydratase)	IPR001030	1	2	4	2	2	2	2	2	2	3	3	4	2	2	3	3	2	4	1	2	2	2	2	2
RNA cap guanine-N2 methyltransferase	IPR019012	4	3	2	2	2	1	0	2	1	2	1	1	0	1	1	2	1	1	2	2	1	2	2	19
GOLGI APPARATUS MEMBRANE PROTEIN TVP15 COPI associated protein	IPR013714	6	5	2	3	1	0	0	5	0	1	4	3	0	1	0	4	0	3	2	3	0	1	2	8
PA14 domain	IPR037524	4	2	4	2	2	3	2	2	0	4	0	0	2	17	1	0	1	0	2	0	0	4	0	6
RIBOSOMAL S SUBUNIT	IPR000851	2	2	1	1	2	3	2	2	3	3	2	3	2	3	3	2	4	3	2	2	3	2	2	2
Beta-L-arabinofuranosidase, GH127	IPR012878	5	14	6	7	0	2	3	10	1	0	9	0	0	0	0	0	0	1	0	0	0	0	0	0
Phosphoadenosine phosphosulfate reductase family	IPR002500	2	2	1	1	2	2	2	2	3	2	2	2	2	9	1	3	1	2	2	2	3	3	3	2
Tyrosine phosphatase family	IPR004861	6	5	5	8	0	0	0	4	0	0	9	3	4	5	0	0	0	5	0	0	4	0	0	0
Phosphorylase superfamily	IPR000845	4	4	1	3	1	2	3	5	2	5	4	1	2	2	1	3	1	1	1	2	1	1	2	4
Oxysterol-binding protein OXYSTEROL-BINDING PROTEIN-RELATED	IPR000648	0	1	0	0	0	3	4	2	12	3	0	5	5	6	3	0	3	0	0	0	6	0	0	5
Alanine dehydrogenase/PNT, N-terminal domain	IPR007886	3	3	3	2	3	2	1	3	0	4	3	1	1	2	1	2	0	5	1	3	0	2	3	7
Ribonucleotide reductase, small chain RIBONUCLEOSIDE-DIPHOSPHATE REDUCTASE SMALL CHAIN	IPR000358	3	2	1	5	3	3	2	1	3	2	3	3	1	1	2	2	2	3	2	2	1	3	3	3
PEPTIDYL-TRNA HYDROLASE 2 Peptidyl-tRNA hydrolase PTH2	IPR002833	3	3	4	3	3	3	2	2	2	2	3	2	3	4	2	2	2	4	1	1	2	1	0	3
Pterin binding enzyme Pterin-binding domain	IPR000489	2	2	3	3	2	4	2	2	1	2	5	1	4	2	2	2	2	3	1	2	3	3	2	1
Ribosomal protein S5, C-terminal domain	IPR005324	2	2	1	1	2	3	2	2	3	3	2	3	2	3	3	2	4	3	2	2	3	2	2	1
DOLICHYL-DIPHOSPHOOLIGOSACCHARIDE--PROTEIN GLYCOSYLTRANSFERASE SUBUNIT Oligosaccharyl transferase STT3 subunit	IPR003674	4	7	3	4	2	1	2	3	1	1	5	1	1	3	2	1	1	2	2	2	2	2	2	1
Protein of unknown function (DUF3110)	IPR021503	11	6	1	8	1	2	1	4	2	0	4	1	2	1	2	0	1	3	0	1	3	0	2	0
Universal stress protein family	IPR006016	1	1	0	1	1	12	5	1	9	4	0	0	0	3	7	0	5	0	1	0	4	0	0	2
XYLULOSE-1,5-BISPHOSPHATE (XUBP) PHOSPHATASE	IPR044999	2	2	0	2	2	3	4	2	3	2	2	2	2	3	2	2	3	2	2	2	3	4	2	2
Tryptophan/tyrosine permease family	IPR018227	1	5	4	2	3	2	1	4	1	1	4	2	2	3	2	2	3	1	1	2	1	2	3	2
RNA dependent RNA polymerase RNA-DEPENDENT RNA POLYMERASE	IPR007855	2	4	4	1	3	0	0	7	1	10	5	0	0	0	0	2	0	1	0	1	3	4	3	6
Zinc finger SP-RING-type Zinc-finger of the MIZ type in Nse subunit	IPR004181	7	2	2	2	1	1	1	1	1	3	2	1	3	3	3	1	2	3	2	2	2	1	2	6
Probable GTP-binding protein EngB [engB]	IPR019987	3	3	3	2	1	1	2	4	1	5	3	2	1	2	3	2	3	1	2	2	2	1	1	4
Uncharacterized ACR, YdiU/UPF0061 family PROTEIN ADENYLYLTRANSFERASE SELO, MITOCHONDRIAL	IPR003846	5	7	5	5	1	1	2	3	2	3	6	1	1	2	1	1	1	2	1	2	1	0	1	2
PNAS-3 RELATED	IPR026699	2	2	2	3	3	1	2	1	2	3	2	2	10	2	2	2	1	1	2	2	2	2	2	2
S5 double stranded RNA-binding domain Ribosomal protein S5, N-terminal domain	IPR013810	2	2	1	1	2	3	2	2	3	3	1	3	2	3	3	2	4	3	2	2	3	2	2	2
Alanyl-transfer RNA synthetases family	IPR018165	3	5	2	3	2	1	2	2	2	3	3	1	2	1	3	3	2	3	0	3	2	2	2	2
ARABINOSYLTRANSFERASE RRA3	IPR044290	9	10	6	5	0	3	3	4	2	0	7	0	0	0	2	0	2	4	0	0	0	0	0	0
N-terminal domain of galactosyltransferase	IPR027791	3	4	8	5	2	1	0	2	0	2	4	1	6	1	3	3	1	0	1	1	3	2	2	1
SURF4 family	IPR002995	8	9	9	6	0	0	0	5	1	0	9	1	2	0	0	0	0	2	1	0	1	3	0	0
ERCC4 domain	IPR006166	1	4	3	5	2	3	1	2	2	2	1	3	2	2	2	2	2	1	4	2	1	2	3	2
Trm1 methyltransferase domain N 2 ,N 2 -DIMETHYLGUANOSINE TRNA METHYLTRANSFERASE N2,N2-dimethylguanosine tRNA methyltransferase	IPR002905	3	4	6	3	2	1	2	4	1	1	7	1	1	3	3	1	3	4	1	1	1	1	0	2
Aspartate/ornithine carbamoyltransferase, carbamoyl-P binding domain	IPR006132	3	3	2	3	2	2	2	1	2	3	2	3	2	2	2	2	2	3	2	2	2	4	2	2
INOSINE-URIDINE PREFERRING NUCLEOSIDE HYDROLASE	IPR023186	15	4	2	2	1	1	4	1	1	4	5	1	0	2	2	0	2	2	2	0	1	1	1	2
Polypeptide deformylase Peptide deformylase [def] PEPTIDE DEFORMYLASE	IPR023635	3	5	2	4	3	1	3	2	1	3	4	1	1	1	2	1	2	2	2	2	1	4	3	1
Putative zinc finger in N-recognin (UBR box) Zinc finger UBR-type	IPR003126	0	4	7	3	1	1	0	5	0	2	3	2	2	3	2	3	1	3	3	4	1	1	2	2
TRANSLATION FACTOR GUF1-RELATED Elongation factor 4 [lepA]	IPR006297	4	5	2	3	2	3	2	2	2	3	3	2	2	2	2	2	2	2	2	2	2	1	2	1
Mitochondrial biogenesis AIM24	IPR002838	2	1	0	2	4	0	3	0	0	0	4	0	3	6	1	4	1	6	4	5	1	2	3	0
Zeta toxin	IPR010488	3	10	4	2	2	0	0	9	1	3	8	0	1	3	0	2	0	2	2	1	0	1	0	0
UvrB/uvrC motif	IPR001943	1	6	0	1	0	4	2	6	1	2	4	1	4	7	5	0	2	0	0	0	5	2	0	4
UDP-glucose/GDP-mannose dehydrogenase family, central domain	IPR014026	3	3	4	3	1	1	3	3	2	2	3	6	2	5	1	1	3	1	1	1	2	2	2	1
RAB GDP-DISSOCIATION INHIBITOR GDP dissociation inhibitor	IPR018203	3	2	1	3	1	2	2	2	2	2	5	3	2	2	2	3	2	4	2	2	2	2	2	2
6-PHOSPHOGLUCONOLACTONASE	IPR039104	5	6	2	4	1	2	2	6	1	0	5	1	1	2	2	1	2	1	4	1	1	3	2	0
PROTEIN-L-ISOASPARTATE O-METHYLTRANSFERASE	IPR000682	1	4	6	2	3	3	3	4	2	3	1	2	1	1	1	2	1	2	1	2	2	1	2	4
Putative S-adenosyl-L-methionine-dependent methyltransferase UNCHARACTERIZED	IPR003788	3	3	6	2	2	2	2	3	2	1	5	2	2	2	2	2	2	2	1	2	2	2	1	1
Ciliary basal body-associated, B9 protein B9 DOMAIN-CONTAINING C2 B9-type domain	IPR010796	4	4	3	3	5	0	3	4	0	4	4	0	0	4	4	0	0	3	1	0	0	3	3	4
RCK N-terminal domain TrkA-N domain	IPR003148	2	3	5	1	3	2	2	5	2	3	2	3	2	1	1	1	1	0	2	2	2	4	3	1
NodB homology domain Polysaccharide deacetylase	IPR002509	0	3	1	1	2	17	0	4	1	5	4	1	0	2	0	2	0	2	1	1	0	2	1	4
1,3-beta-glucan synthase subunit FKS1, domain-1	IPR026899	2	6	22	3	1	1	4	2	0	1	1	0	0	0	0	1	0	1	1	1	0	1	0	7
Spermidine synthase tetramerisation domain	IPR035246	3	3	1	3	4	1	2	3	2	2	2	2	2	2	2	1	2	2	2	3	2	4	2	2
CENP-V/GFA domain Glutathione-dependent formaldehyde-activating enzyme	IPR006913	6	5	2	2	2	1	0	2	3	5	2	1	0	3	2	2	0	2	2	2	1	0	1	6
Carbonic anhydrase	IPR001765	3	0	0	0	0	3	5	4	3	8	3	1	1	5	1	2	1	10	2	2	2	0	0	0
Carbohydrate-binding module 48 (Isoamylase N-terminal domain)	IPR004193	0	1	0	0	0	5	6	1	5	2	3	3	4	1	8	0	6	1	0	0	4	0	0	6
THIOREDOXIN DOMAIN-CONTAINING PROTEIN 9	IPR045037	3	2	4	2	2	3	2	3	2	3	3	1	1	3	3	2	3	3	1	2	1	1	2	2
PHOSPHOLIPID SCRAMBLASE-RELATED Scramblase	IPR005552	5	5	1	4	4	0	3	4	1	4	5	1	1	2	1	0	0	4	1	1	1	2	1	3
HYR domain HYR domain	IPR003410	0	0	1	0	0	0	1	0	0	49	0	0	0	0	0	0	0	0	0	0	1	2	0	2
UNCHARACTERIZED PRP38 family	IPR005037	3	5	1	5	3	2	2	2	2	2	5	2	1	2	2	2	2	1	1	2	1	2	2	2
PhoD-like phosphatase	IPR018946	1	6	1	0	2	2	2	4	0	1	4	0	3	5	1	1	1	1	4	5	0	3	4	4
Ribosomal protein L3	IPR000597	2	2	1	2	2	3	2	3	3	2	4	4	2	3	3	2	3	2	1	2	2	0	2	2
HIV-INDUCED PROTEIN-7-LIKE PROTEASE	IPR039138	3	5	3	5	2	2	2	6	2	1	3	2	2	3	2	2	2	3	2	0	2	0	1	1
26S PROTEASOME NON-ATPASE REGULATORY SUBUNIT 12/COP9 SIGNALOSOME COMPLEX SUBUNIT 4	IPR040134	3	2	6	3	3	2	1	2	2	2	2	2	2	2	2	2	2	2	2	2	2	1	2	2
OS04G0405600 PROTEIN Protein of unknown function (DUF1350)	IPR010765	3	4	3	3	0	2	2	3	1	2	3	1	2	2	2	2	2	1	1	3	2	3	3	2
MBOAT, membrane-bound O-acyltransferase family	IPR004299	1	2	1	1	2	3	2	2	2	1	1	5	2	5	3	2	2	0	1	2	3	2	2	6
N-terminal domain of ribose phosphate pyrophosphokinase	IPR029099	3	2	3	2	2	1	2	2	2	3	4	2	2	4	2	2	1	1	0	2	3	2	2	4
DNA polymerase beta thumb	IPR029398	5	3	4	5	3	2	0	3	1	2	5	0	1	1	2	2	1	2	3	1	1	0	0	6
FLAP ENDONUCLEASE FAMILY MEMBER	IPR032641	2	3	4	4	3	1	1	4	1	1	8	1	1	2	0	3	2	4	2	1	0	1	2	3
Seryl-tRNA synthetase N-terminal domain	IPR015866	3	3	1	3	2	2	1	3	2	3	3	2	2	3	2	2	2	1	2	2	2	3	1	2
DIGALACTOSYLDIACYLGLYCEROL SYNTHASE 2, CHLOROPLASTIC	IPR044525	3	3	5	2	2	1	1	3	3	1	3	0	2	1	2	1	2	1	2	4	2	3	4	1
GTP cyclohydrolase II	IPR032677	7	3	2	2	2	2	2	2	1	2	3	1	1	3	2	2	2	2	1	2	3	2	2	2
ADP-RIBOSYLATION FACTOR-LIKE PROTEIN 2-RELATED	IPR044612	4	4	4	4	3	1	2	3	1	2	6	1	1	2	2	1	1	3	2	1	1	1	2	2
DEK C terminal domain	IPR014876	5	5	0	2	0	3	4	3	4	3	1	0	2	2	6	1	1	3	0	1	1	3	3	2
ATP synthase ATP SYNTHASE GAMMA CHAIN ATP synthase gamma chain [atpG]	IPR000131	2	2	0	2	2	3	2	2	2	3	4	2	3	2	3	2	2	2	1	2	3	2	2	3
Acetyl-coenzyme A synthetase N-terminus	IPR032387	3	3	1	1	3	2	3	2	3	2	3	5	1	2	1	2	2	1	1	2	1	2	2	3
Calx-beta domain	IPR003644	9	10	7	3	2	0	1	4	0	3	1	0	0	4	1	0	0	4	2	0	0	1	1	2
DOMON domain DOMON domain	IPR005018	3	1	1	1	2	3	6	2	1	2	0	0	3	0	1	0	0	0	2	4	3	9	6	4
Ribosomal RNA adenine dimethylase DIMETHYLADENOSINE TRANSFERASE rRNA adenine N(6)-methyltransferase family	IPR001737	3	2	2	1	3	2	2	2	1	3	2	2	2	3	2	3	2	2	3	2	2	3	2	2
NITROGEN METABOLIC REGULATION PROTEIN NMR-RELATED	IPR044163	7	3	3	5	1	1	1	4	1	4	6	1	1	1	1	1	0	3	1	1	1	2	2	2
dTTP/UTP pyrophosphatase Maf-like protein BIFUNCTIONAL DTTP/UTP PYROPHOSPHATASE/METHYLTRANSFERASE PROTEIN-RELATED	IPR003697	4	3	2	3	2	2	1	4	1	3	3	2	3	3	2	1	2	1	2	1	2	2	2	2
SecA DEAD-like domain	IPR011115	6	7	4	3	2	2	3	5	2	2	2	2	1	2	2	1	2	0	0	1	1	2	1	1
ATAXIA TELANGIECTASIA MUTATED ATM -RELATED	IPR026683	2	4	7	3	4	1	1	2	1	2	6	2	1	1	1	3	1	4	1	2	1	2	1	1
Chaperone protein DnaJ [dnaJ]	IPR012724	1	1	1	1	3	2	3	1	2	4	2	6	3	5	2	2	2	2	1	1	4	1	1	3
ALPHA-1,2 MANNOSYLTRANSFERASE KTR1 Glycolipid 2-alpha-mannosyltransferase	IPR002685	2	6	7	3	1	3	0	5	1	2	5	0	0	5	0	2	0	0	4	1	0	3	3	0
LEUCINE ZIPPER-EF-HAND CONTAINING TRANSMEMBRANE PROTEIN	IPR044202	5	4	4	1	2	2	2	4	2	1	1	3	2	2	2	3	2	1	1	2	2	2	1	2
Ribosomal protein L22p/L17e	IPR001063	2	2	1	2	1	3	3	2	3	4	2	2	2	2	3	2	3	2	0	2	2	2	2	3
Ribosomal protein S9/S16 RIBOSOMAL PROTEIN S9	IPR000754	2	2	1	2	2	2	2	2	2	3	2	3	2	3	2	2	2	2	2	2	2	2	2	3
IMPACT-RELATED	IPR023582	3	4	4	2	2	2	2	3	1	4	5	1	2	2	3	2	2	1	0	2	2	0	2	1
Xylanase inhibitor N-terminal	IPR032861	0	5	8	1	2	3	2	3	1	1	5	0	0	0	1	1	3	0	0	4	0	3	6	1
FAMILY NOT NAMED	IPR011147	6	4	3	4	2	3	3	3	2	2	2	1	1	2	2	1	2	0	1	1	2	2	1	1
MIT (microtubule interacting and transport) domain	IPR007330	3	4	5	5	2	1	1	6	1	1	3	2	1	2	3	3	1	2	0	1	0	2	2	2
Adenylate kinase, active site lid	IPR007862	5	2	1	4	3	1	0	10	1	1	2	1	1	2	2	2	2	1	1	2	1	3	2	2
Insertion domain in 60S ribosomal protein L10P	IPR040637	2	2	2	2	4	2	2	2	2	4	2	2	2	2	2	2	2	2	2	2	2	2	2	2
TRANSCRIPTION INITIATION FACTOR IIB-RELATED	IPR000812	3	3	1	2	1	3	2	1	2	2	2	3	3	3	3	2	4	2	1	1	4	0	2	2
GIY-YIG catalytic domain GIY-YIG domain	IPR000305	1	2	0	2	0	1	3	2	0	2	4	2	2	0	4	1	9	1	0	3	2	3	2	4
GLUCOSE-6-PHOSPHATE 1-DEHYDROGENASE G6PD Glucose-6-phosphate 1-dehydrogenase [zwf]	IPR001282	4	3	5	4	3	2	3	3	2	0	3	2	2	0	3	2	1	0	1	2	2	1	1	2
DIACYLGLYCEROL KINASE	IPR037607	3	3	5	2	1	2	3	2	2	5	3	2	1	1	4	2	2	1	1	1	2	0	2	3
PAZ domain PAZ domain	IPR003100	3	6	4	0	0	2	2	1	2	8	2	0	2	1	0	1	0	0	1	0	3	0	1	14
Histidyl-tRNA synthetase	IPR041715	2	3	4	1	2	3	1	2	3	4	1	1	2	4	3	2	2	1	2	2	1	1	2	3
PRE-MRNA-SPLICING FACTOR RBM22	IPR039171	5	5	3	1	1	2	2	4	1	1	5	1	1	4	2	2	2	3	2	1	1	1	1	2
Endoplasmic Reticulum Oxidoreductin 1 (ERO1) ERO1-RELATED	IPR007266	6	3	4	1	2	1	1	4	1	1	5	1	1	3	1	1	1	2	2	2	1	4	2	1
Protein of unknown function (DUF4239)	IPR025333	5	5	7	3	7	0	0	1	0	4	0	0	0	0	0	0	0	2	4	5	0	4	3	2
Ribonuclease HII	IPR024567	2	3	1	2	2	2	2	2	1	2	4	1	3	3	1	2	1	2	2	3	2	3	3	2
Tudor domain Tudor domain	IPR002999	3	2	4	2	2	2	3	4	0	2	5	1	1	4	3	3	2	1	3	1	0	1	1	3
MYST family zinc finger domain	IPR040706	3	3	3	3	3	1	2	3	2	2	3	1	1	3	3	2	3	2	2	2	2	0	2	1
THUMP domain THUMP domain	IPR004114	4	4	4	3	2	1	0	4	1	2	6	1	1	3	3	2	2	0	2	2	1	1	0	4
GLUTATHIONE REDUCTASE	IPR006322	4	7	7	5	2	0	0	2	0	2	4	0	0	0	0	2	0	4	1	3	1	2	4	2
TRNA PSEUDOURIDINE SYNTHASE D tRNA pseudouridine synthase D (TruD)	IPR001656	0	4	4	2	0	1	0	4	1	3	3	1	1	9	1	2	1	3	1	2	2	2	2	3
Glucosidase II beta subunit-like protein	IPR036607	3	4	7	3	4	1	1	4	1	1	2	1	1	1	1	2	1	0	4	1	1	6	2	1
Replication factor-A protein 1, N-terminal domain	IPR007199	5	3	6	3	2	1	1	4	1	0	5	1	1	1	2	1	3	2	1	2	1	5	2	0
ALPHA-KETOGLUTARATE-DEPENDENT DIOXYGENASE ALKB HOMOLOG 3	IPR032854	3	6	6	5	1	1	0	2	1	2	6	0	1	2	2	1	1	2	2	1	1	2	2	1
PUTATIVE SEROTONIN TRANSPORTER LrgB-like family	IPR007300	3	5	3	2	1	0	1	3	1	5	3	1	1	3	0	1	1	2	1	4	3	1	2	3
Eukaryotic porin	IPR027246	2	1	2	1	1	2	3	3	2	2	2	4	3	3	3	3	2	2	1	2	2	1	2	2
GLUTAMINYL-PEPTIDE CYCLOTRANSFERASE Glutamine cyclotransferase	IPR007788	3	3	4	3	1	1	1	5	1	4	2	0	2	3	1	1	1	2	1	2	2	3	1	3
Neprilysin-like (M13) protease domain ZINC METALLOPROTEASE FAMILY M13 NEPRILYSIN-RELATED	IPR000718	3	5	4	3	0	0	0	0	0	1	1	1	2	19	1	0	0	2	0	1	2	0	1	6
NOT2 / NOT3 / NOT5 family	IPR007282	3	2	1	2	2	1	2	2	3	2	3	3	2	1	2	4	2	2	2	2	2	1	2	3
SIDEROFLEXIN Sideroflexins	IPR004686	5	6	6	5	3	0	0	3	0	3	6	0	0	2	0	2	0	2	0	1	0	1	1	5
Sas10/Utp3/C1D family SOMETHING ABOUT SILENCING PROTEIN 10-RELATED	IPR007146	2	3	2	2	0	0	2	2	1	2	3	2	3	4	1	2	2	2	3	2	2	2	2	5
EXPORTIN 1/5	IPR045065	3	3	1	3	3	2	1	1	2	1	2	1	2	3	2	2	2	3	2	2	1	2	1	6
RIBOSOME BIOGENESIS PROTEIN	IPR039761	3	3	4	0	2	2	2	1	2	2	4	2	2	3	2	2	2	2	1	2	2	1	2	2
Anion-transporting ATPase	IPR025723	1	1	2	1	2	2	3	1	2	2	3	3	8	2	1	2	1	0	0	2	5	1	3	2
40S RIBOSOMAL PROTEIN S11 FAMILY MEMBER Ribosomal protein S17	IPR000266	2	2	2	2	2	3	3	1	3	2	2	2	1	3	3	2	3	2	2	2	2	1	2	2
Coatomer WD associated region	IPR006692	2	2	3	2	4	1	2	2	2	3	2	2	2	2	3	1	2	3	2	2	2	1	2	2
NUCLEOLAR PROTEIN 5 NUCLEOLAR PROTEIN NOP5 NOP58	IPR045056	2	4	3	2	2	2	2	1	2	2	3	2	2	2	2	2	2	2	1	2	2	3	2	2
MANNOSE-P-DOLICHOL UTILIZATION DEFECT 1 LEC35 -RELATED	IPR016817	4	4	3	5	2	2	2	3	1	2	5	2	2	2	1	1	0	3	1	1	2	1	1	1
NACHT domain	IPR007111	0	4	6	5	2	0	1	24	0	0	0	0	0	3	0	1	0	1	2	1	0	0	0	2
Arylsulfotransferase (ASST)	IPR010262	1	0	0	1	12	0	0	0	0	0	1	0	0	0	0	0	0	0	0	0	0	0	0	38
CASEIN KINASE-RELATED	IPR030509	2	1	0	1	4	1	1	3	2	4	2	3	2	4	1	2	1	2	3	3	1	2	2	4
TENA/THI-4/PQQC family	IPR004305	3	2	0	5	2	4	1	3	0	2	2	0	1	3	2	1	2	2	3	2	2	4	2	3
LONGEVITY ASSURANCE FACTOR 1 LAG1	IPR016439	6	3	2	4	1	2	7	1	2	2	3	2	1	2	1	3	1	0	0	2	2	1	2	2
CobN/Magnesium Chelatase MAGNESIUM-CHELATASE SUBUNIT CHLH, CHLOROPLASTIC	IPR003672	4	2	2	1	1	3	1	1	2	3	4	1	3	2	2	3	2	3	1	2	1	2	2	2
Dihydrodipicolinate synthetase family DIHYDRODIPICOLINATE SYNTHASE	IPR002220	4	5	6	4	5	1	1	2	2	2	4	1	1	2	1	2	1	1	1	1	1	1	2	1
rRNA-processing arch domain	IPR025696	2	3	4	1	1	3	2	2	3	3	3	3	1	1	3	2	3	2	0	2	2	1	2	2
Protein of unknown function (DUF1800)	IPR014917	0	4	3	3	2	0	0	5	0	0	10	0	0	0	0	0	0	0	0	0	0	14	8	0
Acetyl-CoA carboxylase, central region	IPR013537	2	2	4	2	2	1	1	6	1	4	2	1	1	2	2	1	2	2	0	2	4	3	2	2
4'-phosphopantetheinyl transferase superfamily	IPR008278	3	3	2	3	2	2	2	2	2	3	3	1	1	2	2	3	2	2	2	2	1	2	1	3
Beta-Casp domain	IPR022712	3	3	2	1	1	1	3	1	1	3	3	3	3	4	2	2	2	2	0	2	3	1	2	3
DHH family	IPR001667	4	4	4	2	3	0	0	3	0	1	5	0	2	1	3	2	2	0	2	1	3	3	4	1
RNA-BINDING PROTEIN RELATED	IPR045071	3	4	5	4	1	1	2	1	1	1	3	2	3	5	3	2	2	1	0	1	2	1	1	2
Thiopurine S-methyltransferase (TPMT) Thiopurine or thiol or thiocyanate S-methyltransferase (TPMT) family	IPR008854	4	3	1	2	2	1	1	4	1	2	7	1	1	2	2	2	1	2	1	2	1	2	2	2
GNT-I family	IPR004139	4	4	3	4	2	2	0	2	1	0	5	2	2	7	2	0	0	2	2	1	3	1	1	1
RNA polymerase Rpb3/RpoA insert domain	IPR011262	2	2	1	1	1	1	2	2	3	4	4	3	2	3	2	1	2	2	0	2	2	2	2	3
Zinc finger TAZ-type TAZ zinc finger	IPR000197	2	3	1	1	5	1	4	2	1	0	0	0	0	0	1	2	1	0	6	5	0	3	7	0
FAMILY NOT NAMED	IPR031155	4	1	3	3	2	1	3	4	6	1	6	1	2	3	0	1	1	2	1	2	0	2	1	1
S-adenosylmethionine-dependent methyltransferase	IPR019614	2	3	2	3	2	1	1	5	0	3	4	0	0	1	3	1	1	4	2	2	1	4	3	2
METHYLTRANSFERASE-RELATED	IPR026113	1	4	5	3	2	1	1	3	2	1	4	2	2	1	3	2	2	2	2	1	2	2	1	2
Zn-dependent metallo-hydrolase RNA specificity domain	IPR011108	3	3	3	1	1	2	4	2	2	2	2	2	3	3	3	2	3	2	0	1	3	1	1	2
Zinc finger HIT-type HIT zinc finger	IPR007529	1	1	1	2	1	3	2	1	1	3	2	2	5	0	3	2	4	3	3	2	2	1	2	3
RIBONUCLEASE H2 SUBUNIT A	IPR001352	2	3	1	2	2	2	2	2	1	2	3	1	3	3	1	2	1	2	2	2	2	3	3	2
CYTOCHROME C1 HEME LYASE Cytochrome c/c1 heme lyase	IPR000511	2	1	4	2	1	2	9	2	1	1	4	0	1	2	2	2	2	2	1	2	1	2	2	2
DDT domain DDT domain	IPR018501	3	6	7	2	1	2	1	4	2	1	3	1	1	4	2	0	1	1	0	2	2	1	2	1
TRANSALDOLASE Transaldolase/Fructose-6-phosphate aldolase	IPR001585	1	2	2	1	2	3	3	2	3	1	5	1	1	3	2	2	2	1	2	3	0	3	4	1
TRANSIENT RECEPTOR POTENTIAL CHANNEL	IPR002153	6	10	4	4	0	0	5	4	0	1	5	0	0	0	0	0	0	0	0	0	0	0	0	13
ARSENICAL PUMP-DRIVING ATPASE ARSENITE-TRANSLOCATING ATPASE	IPR016300	1	1	2	1	2	2	2	1	2	2	3	3	8	2	1	2	1	0	0	2	5	1	3	2
Root hair defective 3 GTP-binding protein (RHD3) PROTEIN SEY1	IPR008803	0	5	3	1	0	1	1	2	1	3	2	6	7	2	1	2	1	2	1	0	8	0	1	2
3-HYDROXYISOBUTYRYL-COA HYDROLASE-RELATED	IPR032259	1	3	2	3	2	1	1	3	2	2	6	1	2	3	1	3	1	2	1	2	1	3	2	2
Ribosomal protein S8e	IPR022309	2	2	2	2	2	2	2	2	2	2	3	3	2	2	2	2	2	2	2	2	2	2	2	2
GRAM domain	IPR004182	2	6	8	2	1	1	1	2	2	2	4	4	1	3	2	2	1	4	0	0	0	1	1	1
Ergosterol biosynthesis ERG4/ERG24 family	IPR001171	2	2	3	2	3	0	1	4	2	3	2	1	2	2	4	2	1	2	1	2	3	2	2	2
Domain found in Dishevelled, Egl-10, and Pleckstrin (DEP) DEP domain	IPR000591	3	1	1	0	0	0	1	1	1	1	0	2	7	2	2	1	3	0	2	2	10	3	2	4
Glucose-6-phosphate dehydrogenase, C-terminal domain	IPR022675	4	3	3	4	3	2	3	3	2	0	3	2	2	0	3	2	1	0	1	2	2	1	1	2
40S ribosome biogenesis protein Tsr1 and BMS1 C-terminal	IPR007034	2	3	4	0	2	2	2	1	3	3	3	2	2	3	3	2	2	2	1	2	2	0	2	2
50S ribosomal protein L12 [rpl12]	IPR027534	2	2	0	0	2	2	2	2	2	3	2	3	2	6	2	3	2	2	0	2	3	1	2	3
MEIOTIC RECOMBINATION PROTEIN SPO11	IPR002815	1	2	2	1	1	2	2	2	2	1	3	3	3	3	2	2	2	2	1	2	2	4	2	3
Aspartate/ornithine carbamoyltransferase, Asp/Orn binding domain	IPR006131	3	3	2	3	2	2	2	1	2	3	2	2	2	2	2	2	2	1	2	2	2	2	2	2
PROLYL HYDROXYLASE-RELATED	IPR039210	7	9	6	6	2	0	0	6	0	0	3	0	0	2	1	1	0	2	3	0	0	2	1	0
BETA-GALACTOSIDASE	IPR023933	3	4	5	4	1	1	1	5	1	1	7	0	0	3	1	1	1	1	1	2	0	3	1	2
Cell division protein FtsZ [ftsZ]	IPR000158	6	5	4	5	2	0	2	3	1	0	1	2	0	0	2	3	2	3	2	3	0	2	4	0
Ecdysteroid kinase	IPR004119	8	7	4	7	2	1	1	2	0	3	1	0	1	1	1	0	0	0	2	1	2	2	2	0
GED domain	IPR020850	4	3	2	2	3	2	7	3	3	2	1	1	2	1	2	1	1	2	4	1	1	0	1	2
Glutamate/Leucine/Phenylalanine/Valine dehydrogenase	IPR006096	3	1	2	1	1	4	2	1	3	3	2	2	2	3	0	2	0	1	2	3	3	3	4	1
CWF19, CELL CYCLE CONTROL PROTEIN	IPR040194	2	2	1	2	2	2	4	3	2	2	3	2	1	3	3	1	3	2	2	2	0	2	2	2
Conserved region in glutamate synthase	IPR002932	5	3	2	4	2	2	2	3	2	3	2	1	0	2	2	2	1	1	0	2	0	3	2	2
Histidine biosynthesis protein	IPR006062	2	2	2	2	2	2	2	2	2	2	2	2	2	2	3	2	2	2	2	2	2	3	2	2
LON PROTEASE ATP DEPENDENT LON PROTEASE FAMILY MEMBER	IPR027065	3	3	4	2	1	2	1	4	1	5	3	1	3	1	2	3	2	3	1	1	1	1	1	2
EQUILIBRATIVE NUCLEOSIDE TRANSPORTER Nucleoside transporter	IPR002259	4	3	3	1	1	4	2	1	2	4	7	0	1	2	2	2	2	2	0	1	1	0	0	4
CALCIUM BINDING PROTEINS	IPR028846	9	3	6	6	3	0	0	4	0	5	1	0	0	1	1	0	1	0	1	1	1	0	1	7
COMM domain COMM domain	IPR017920	8	7	4	7	3	0	0	7	0	0	0	0	0	7	0	0	3	0	5	0	0	0	0	0
N2227-like protein UNCHARACTERIZED	IPR012901	3	6	6	4	1	1	1	3	1	1	2	1	2	4	1	2	1	0	1	1	1	2	3	1
Protein of unknown function (DUF3593)	IPR021995	2	3	5	3	1	1	1	3	0	2	3	2	1	2	3	2	3	2	2	2	1	2	2	1
Nucleosome assembly protein (NAP) TESTIS-SPECIFIC Y-ENCODED PROTEIN	IPR002164	4	3	6	3	1	1	4	5	2	1	1	1	1	2	1	2	1	2	1	1	2	1	1	3
AIG1 family AIG1-type G domain	IPR006703	2	4	1	3	1	2	2	5	2	1	3	2	5	1	4	0	2	1	1	0	6	0	0	3
NUDIX HYDROLASE	IPR039989	10	9	2	8	0	0	0	3	0	0	12	0	0	1	0	0	0	2	0	0	0	0	0	4
ELONGATION FACTOR TS Elongation factor Ts [tsf]	IPR001816	3	3	1	3	2	2	2	2	2	3	3	2	1	2	2	2	2	2	1	1	1	2	2	2
TraB family	IPR002816	1	4	3	3	2	4	1	2	2	1	1	1	1	3	2	1	1	2	0	3	3	2	3	2
LIPASE MATURATION FACTOR Lipase maturation factor	IPR009613	2	5	7	1	3	0	0	1	0	7	6	0	0	6	1	0	0	0	1	1	0	2	1	7
AXONEMAL INNER ARM DYNEIN LIGHT CHAIN 28 Axonemal dynein light chain	IPR019347	6	6	3	5	3	0	1	7	0	3	3	0	0	5	1	0	0	2	3	0	0	0	0	3
PHENAZINE BIOSYNTHESIS PROTEIN Phenazine biosynthesis-like protein	IPR003719	2	4	3	2	3	1	1	2	1	2	6	1	1	3	1	1	1	1	1	3	1	2	2	3
MITOCHONDRIAL FISSION PROCESS PROTEIN 1 Mitochondrial 18 KDa protein (MTP18)	IPR019560	5	4	3	4	4	2	0	3	1	1	8	0	0	2	1	1	1	2	3	1	2	1	0	0
GINS complex protein	IPR021151	5	2	2	3	0	3	3	2	3	2	2	3	2	1	3	2	2	2	2	1	3	0	1	1
U3 SMALL NUCLEOLAR RIBONUCLEOPROTEIN PROTEIN IMP4	IPR044281	1	2	2	1	1	2	2	2	2	3	5	2	1	2	2	2	2	2	2	2	2	2	2	2
Glucose-6-phosphate dehydrogenase, NAD binding domain	IPR022674	4	3	5	4	2	2	1	3	2	0	3	2	2	0	3	2	1	0	1	2	2	1	1	2
Zinc finger B-box type	IPR000315	1	1	2	1	1	1	1	1	2	2	1	1	4	5	5	3	3	2	2	0	3	0	0	9
DNA mismatch repair protein, C-terminal domain	IPR013507	1	2	1	2	3	0	1	3	3	3	1	4	3	2	3	0	2	2	2	2	3	2	2	2
30S 40S RIBOSOMAL PROTEIN	IPR022801	2	2	1	2	2	2	2	2	2	2	2	3	3	3	2	1	2	1	1	2	3	2	2	2
Signal recognition particle 54 kDa protein [srp54] SIGNAL RECOGNITION PARTICLE 54K PROTEIN SRP54	IPR022941	2	2	3	2	2	2	2	2	2	2	2	3	2	2	2	2	2	1	2	2	2	2	2	2
Platelet-activating factor acetylhydrolase, isoform II PLATELET-ACTIVATING FACTOR ACETYLHYDROLASE	IPR005065	5	5	2	4	3	1	1	4	1	2	5	1	1	2	2	0	1	1	0	1	2	3	1	0
Acyl carrier protein [acpP] ACYL CARRIER PROTEIN	IPR003231	1	1	1	3	3	2	2	2	2	1	6	4	1	2	2	1	2	2	2	2	2	2	2	1
Ribosome recycling factor	IPR023584	2	2	3	2	1	2	2	2	1	2	2	2	2	2	2	2	2	2	2	4	2	2	2	2
RIBOSOME RECYCLING FACTOR Ribosome-recycling factor [frr]	IPR002661	2	2	3	2	1	2	2	2	1	2	2	2	2	2	2	2	2	2	2	4	2	2	2	2
YLMG HOMOLOG PROTEIN 2, CHLOROPLASTIC YGGT family	IPR003425	2	1	1	1	1	3	4	2	3	3	1	2	2	3	3	1	3	2	0	2	3	2	2	3
SAM-dependent methyltransferase gamma-tocopherol (gTMT)-type family	IPR025774	3	2	4	3	2	2	2	2	2	2	2	1	1	2	3	2	3	1	1	2	2	1	2	2
FAMILY NOT NAMED	IPR015701	3	5	1	4	4	1	1	4	1	1	3	1	1	1	1	1	1	1	1	4	1	2	3	1
Prolyl-tRNA synthetase, C-terminal	IPR016061	4	2	2	1	2	3	2	1	2	1	3	2	2	3	2	2	2	1	2	2	2	2	2	1
Hydroxymethylglutaryl-coenzyme A synthase N terminal	IPR013528	2	3	1	2	21	1	1	2	1	0	4	1	1	1	0	1	0	1	1	4	1	0	1	0
TRANSMEMBRANE PROTEIN 19 Integral membrane protein DUF92	IPR002794	2	2	3	2	2	2	3	2	2	1	3	1	2	2	2	2	2	3	1	2	2	2	3	1
ISOAMYL ACETATE-HYDROLYZING ESTERASE 1	IPR045136	1	2	2	1	1	1	1	2	1	2	10	1	1	2	1	3	2	3	1	2	1	4	2	1
PROHIBITIN	IPR000163	2	2	1	2	2	2	2	2	2	2	2	2	2	2	2	2	2	2	2	3	2	2	2	2
RNA polymerase Rpb2, domain 4	IPR007646	2	2	3	1	4	2	2	1	2	2	4	2	2	2	2	2	2	2	0	2	2	1	2	2
Nuclear transport factor 2 domain	IPR018222	1	1	1	1	1	2	3	1	2	2	3	2	1	5	4	2	2	1	1	2	2	2	2	3
Ribosomal protein L7/L12 C-terminal domain	IPR013823	2	2	1	2	6	1	2	2	1	3	3	2	1	2	2	0	2	2	0	3	1	2	2	3
Peptidase family M13	IPR008753	2	5	4	2	1	0	0	0	0	1	1	1	2	18	1	0	0	1	0	1	2	0	1	6
RIBOFLAVIN KINASE/FMN ADENYLYLTRANSFERASE	IPR023468	2	2	1	2	2	2	3	2	2	2	4	1	2	2	2	2	2	2	1	2	3	2	2	1
eRF1 domain 1	IPR005140	2	2	2	2	2	2	2	2	2	3	2	2	2	2	2	2	2	2	1	2	2	2	2	2
Glycosyl hydrolases family 28	IPR000743	4	7	5	3	8	1	1	2	1	2	4	0	0	0	0	0	0	0	5	3	0	0	0	2
FORMAMIDASE C86904-RELATED Acetamidase/Formamidase family	IPR004304	1	5	2	1	1	0	1	1	2	1	13	4	0	2	1	0	0	1	3	3	0	2	0	4
uDENN domain	IPR005113	2	3	1	3	0	1	0	4	1	1	5	0	0	2	2	4	1	3	1	4	0	2	5	0
GLUCOSE-6-PHOSPHATE ISOMERASE Phosphoglucose isomerase Glucose-6-phosphate isomerase family Glucose-6-phosphate isomerase [pgi]	IPR001672	2	2	2	2	3	2	1	1	1	1	2	2	2	1	1	2	1	1	2	4	2	4	4	1
ACID PHOSPHATASE RELATED	IPR039331	1	4	5	0	2	6	3	4	6	1	7	0	0	1	1	0	1	1	2	2	0	0	1	0
Dephospho-CoA kinase Dephospho-CoA kinase (DPCK) domain Dephospho-CoA kinase [coaE]	IPR001977	3	4	1	4	2	2	2	3	2	2	4	1	1	2	1	2	1	2	0	2	1	1	2	2
Glycine cleavage T-protein C-terminal barrel domain	IPR013977	2	4	2	2	4	1	1	4	1	3	4	2	1	2	1	1	1	1	1	2	1	1	2	4
ATP-NAD kinase	IPR002504	0	1	1	0	1	3	3	1	2	2	1	2	2	3	3	3	4	0	2	2	6	1	2	3
Adaptin C-terminal domain	IPR008152	2	2	4	3	2	2	2	3	2	2	1	1	1	5	2	2	3	0	1	1	1	1	3	2
Protein of unknown function (DUF760)	IPR008479	3	3	1	3	1	2	2	3	2	1	4	1	2	1	1	2	2	2	2	2	1	3	2	2
TYROSINE SPECIFIC PROTEIN PHOSPHATASE AND DUAL SPECIFICITY PROTEIN PHOSPHATASE	IPR026070	1	1	0	1	2	1	1	1	1	4	0	1	0	26	0	1	0	0	1	1	0	1	1	4
DCD domain Development and cell death domain	IPR013989	8	6	8	6	3	1	0	4	2	0	3	0	0	0	2	1	0	0	3	1	0	1	0	0
3-OXO-5-ALPHA-STEROID 4-DEHYDROGENASE	IPR039357	5	2	3	2	2	2	3	4	1	3	3	1	1	1	2	1	2	1	2	2	1	0	2	2
1-AMINOCYCLOPROPANE-1-CARBOXYLATE DEAMINASE-RELATED	IPR027278	3	3	3	2	0	2	2	3	2	1	6	0	2	2	0	1	1	3	1	2	3	2	2	2
Chitin recognition protein Chitin-binding type-1 domain	IPR001002	11	9	0	12	0	2	3	1	0	1	1	0	0	0	0	1	0	1	0	1	0	5	2	0
PROLINE IMINOPEPTIDASE	IPR005944	7	4	4	4	3	0	1	5	0	2	6	0	1	1	0	1	0	1	2	0	0	3	3	1
Trefoil (P-type) domain P-type 'Trefoil' domain	IPR000519	1	3	4	1	0	2	0	2	3	6	1	0	0	2	1	0	0	0	1	0	1	0	0	22
PIH1 N-terminal domain	IPR012981	3	4	5	5	3	1	1	4	1	3	1	0	0	1	3	1	1	4	2	0	0	2	3	2
BNR repeat-like domain	IPR011040	6	11	11	6	0	1	0	6	1	0	4	0	0	0	0	0	0	4	0	0	0	0	0	0
PRE-MRNA-PROCESSING PROTEIN PRP40	IPR039726	2	6	6	2	1	1	2	3	1	2	7	1	1	1	1	1	2	1	0	1	1	0	2	3
p25-alpha P25 ALPHA-RELATED	IPR008907	1	2	1	1	3	3	8	2	2	7	0	0	0	1	5	0	1	3	3	0	0	0	0	7
DEVELOPMENTALLY-REGULATED GTP-BINDING PROTEIN 2	IPR045001	2	2	2	1	2	2	2	2	2	2	2	3	2	3	2	2	2	2	1	2	2	2	2	2
Phosphagen kinase C-terminal domain ATP:guanido phosphotransferase, C-terminal catalytic domain	IPR022414	5	4	3	6	1	0	0	2	0	11	2	0	0	4	0	1	0	1	2	1	0	1	1	4
DNL zinc finger Zinc finger DNL-type	IPR007853	2	3	3	3	2	3	3	3	2	1	3	0	1	3	2	1	2	3	1	2	1	2	1	1
Ribosomal protein L24e 60S RIBOSOMAL PROTEIN L24	IPR000988	2	2	1	2	2	2	2	2	2	2	3	1	2	2	2	2	2	3	2	2	2	2	2	2
LUNG SEVEN TRANSMEMBRANE RECEPTOR Lung seven transmembrane receptor	IPR009637	6	1	2	2	2	1	1	0	2	3	1	0	0	4	2	2	3	2	2	2	1	2	3	3
MFS_1 like family	IPR024989	2	4	3	1	4	4	1	1	0	2	3	0	1	3	1	1	1	1	4	2	1	1	3	3
Mannosyltransferase putative	IPR022751	0	4	5	2	1	2	3	6	4	3	3	0	1	1	2	5	1	3	1	1	0	0	0	2
RNA polymerase Rpb3/Rpb11 dimerisation domain	IPR011263	2	2	2	1	1	2	2	2	3	3	3	1	2	3	2	1	2	2	1	2	2	2	2	2
Purple acid Phosphatase, N-terminal domain	IPR015914	1	6	3	0	0	6	3	7	10	2	0	2	0	3	1	2	0	1	1	2	0	0	0	0
Domain of unknown function (DUF4281)	IPR025461	2	3	3	1	2	5	2	3	1	2	4	0	0	3	5	1	2	2	0	1	1	1	1	3
MITOCHONDRIAL NICOTINAMIDE ADENINE DINUCLEOTIDE TRANSPORTER 1-RELATED-RELATED	IPR044712	0	1	1	2	0	2	4	0	3	1	3	4	3	3	3	1	4	2	0	2	4	1	2	2
Formamidopyrimidine-DNA glycosylase H2TH domain	IPR015886	1	3	3	2	1	1	2	4	2	2	6	2	0	2	2	2	1	2	1	2	2	2	2	1
Ctr copper transporter family SOLUTE CARRIER FAMILY 31 COPPER TRANSPORTERS	IPR007274	3	2	2	2	0	2	3	2	1	3	3	1	1	1	2	3	1	2	1	3	1	3	1	4
Flavin reductase like domain	IPR002563	2	2	3	2	0	4	3	2	4	1	3	0	1	1	4	0	2	4	1	4	3	0	2	0
50S ribosomal protein L23 [rplW] Ribosomal protein L23 60S RIBOSOMAL PROTEIN L23A	IPR013025	3	2	0	2	1	1	2	2	2	2	2	2	2	3	2	2	2	2	2	2	2	2	2	2
2-OXOGLUTARATE DEHYDROGENASE	IPR011603	2	2	2	0	1	1	1	1	2	1	3	4	1	3	2	2	3	4	1	7	1	1	1	1
G8 domain G8 domain	IPR019316	4	5	5	6	2	2	3	5	0	2	2	0	0	0	0	0	1	3	0	6	0	1	0	2
Diacylglycerol kinase accessory domain	IPR000756	3	3	5	2	1	2	2	2	2	3	3	2	1	1	4	2	2	0	1	1	2	0	2	2
50S RIBOSOMAL PROTEIN L15	IPR005749	2	2	1	2	2	2	2	2	2	2	2	2	2	2	2	2	2	3	2	2	2	1	2	2
Ribosomal L28e protein family	IPR029004	2	2	0	2	2	2	2	2	2	2	2	2	2	2	2	2	2	3	1	2	2	3	2	2
EGF-like domain	IPR013111	7	11	13	3	1	1	0	5	1	0	0	1	0	4	0	0	0	0	0	0	0	1	0	0
Protein of unknown function (DUF667)	IPR007714	3	4	2	3	3	2	3	3	1	3	1	0	0	3	3	2	1	4	4	0	0	1	1	2
FAMILY NOT NAMED	IPR044995	3	3	1	1	2	2	2	3	2	1	3	3	2	2	2	2	2	2	1	2	2	1	1	3
Limiting CO2-inducible proteins B/C beta carbonyic anhydrases	IPR040703	6	1	0	1	0	6	4	1	2	2	6	0	0	2	1	0	1	0	1	5	0	3	5	0
26S PROTESOME SUBUNIT 6	IPR019585	2	2	3	0	1	2	2	2	2	2	4	2	2	2	2	2	2	2	0	2	2	2	2	3
Elongation factor P (EF-P) KOW-like domain	IPR013185	4	4	1	4	2	1	2	1	2	2	3	1	1	2	2	3	0	1	2	2	1	1	2	2
XENOTROPIC AND POLYTROPIC RETROVIRUS RECEPTOR 1-RELATED	IPR033507	6	4	2	0	3	0	0	3	0	3	5	0	0	1	1	4	1	1	3	3	1	1	3	1
Ribonucleotide reductase, all-alpha domain	IPR013509	3	3	4	3	5	1	1	3	1	2	1	2	1	2	1	2	1	2	1	2	1	1	2	2
Thiamine pyrophosphate enzyme, central domain	IPR012000	3	2	2	2	0	4	2	1	4	9	2	2	0	1	1	2	1	0	0	2	1	1	2	4
SecA family	IPR014018	2	2	4	1	2	3	3	3	2	2	2	2	1	5	2	1	2	1	0	1	1	2	1	1
Transmembrane family, TMEM144 of transporters	IPR012435	4	4	8	2	1	1	0	2	1	1	7	0	0	0	0	1	0	3	0	4	0	3	2	2
RNA polymerase Rpb3/Rpb11 dimerisation domain	IPR009025	2	2	3	2	3	1	2	2	2	2	3	0	2	1	2	2	2	2	2	2	2	2	2	2
GTP-BINDING PROTEIN ALPHA SUBUNIT G-protein alpha subunit G-alpha domain	IPR001019	7	5	10	3	4	0	0	4	0	0	5	0	0	0	0	1	0	0	3	1	0	3	2	0
TRANSCRIPTION FACTOR E2F	IPR015633	1	3	5	1	1	2	1	2	2	0	2	4	2	2	3	2	2	2	1	3	2	0	2	2
Alanine dehydrogenase/PNT, C-terminal domain	IPR007698	2	2	4	2	2	2	1	2	0	4	3	0	1	2	1	1	0	1	1	3	0	3	2	7
C-terminal region of MMR_HSR1 domain	IPR031662	2	2	2	1	2	2	2	2	2	2	2	3	2	3	2	2	2	1	1	2	2	2	2	2
HEAT SHOCK PROTEIN 90 HSP90 CO-CHAPERONE AHA-1	IPR039981	6	5	3	3	1	1	3	3	2	2	2	1	1	3	4	0	3	1	1	0	1	0	0	3
Copine	IPR010734	2	0	1	1	0	2	3	0	2	0	0	1	4	9	0	1	0	0	0	8	8	2	1	1
Ribosomal protein S10p/S20e	IPR027486	2	1	2	2	1	4	4	2	3	3	2	1	2	2	2	1	2	4	1	1	2	1	1	2
Fructose-bisphosphate aldolase class-II	IPR000771	3	4	1	4	2	0	0	3	0	1	6	0	1	2	1	1	1	2	2	4	1	3	3	0
RIBOSOMAL PROTEIN L2	IPR002171	2	2	2	2	1	2	2	2	2	2	2	3	3	3	2	2	2	3	1	1	2	1	1	2
Replication protein A OB domain	IPR031657	2	2	5	2	2	2	2	2	2	2	3	1	1	2	2	1	3	1	2	1	2	1	1	4
Dual specificity protein phosphatase, N-terminal half	IPR029260	1	1	0	1	2	1	1	1	1	3	0	1	0	25	0	1	0	1	1	1	0	1	1	4
GTP-binding protein LepA C-terminus	IPR013842	3	3	1	3	1	2	2	2	2	2	3	2	2	2	2	2	2	1	2	2	2	1	2	1
Protein of unknown function (DUF861)	IPR008579	5	4	2	4	1	1	1	3	0	1	5	2	1	3	1	1	1	2	3	0	0	1	3	2
RNA polymerase Rpb2, domain 5	IPR007647	2	2	3	1	3	2	2	1	1	2	4	2	3	1	2	2	2	3	0	2	2	1	2	2
Domain of unknown function (DUF3336)	IPR021771	2	2	3	0	1	2	1	3	1	2	5	1	1	3	2	2	2	2	2	2	2	2	2	2
GLYCYL-TRNA SYNTHETASE/DNA POLYMERASE SUBUNIT GAMMA-2	IPR027031	2	2	4	0	4	1	1	2	1	2	1	1	1	5	1	2	1	3	2	2	1	4	2	2
Protein RETICULATA-related	IPR021825	0	1	0	0	0	5	4	1	6	1	0	4	6	5	3	1	3	3	0	0	4	0	0	1
NOP5NT (NUC127) domain	IPR012974	2	2	2	2	2	2	2	1	2	2	3	2	2	2	2	2	2	2	1	2	2	2	2	2
eRF1 domain 3	IPR005142	2	2	2	1	2	2	2	2	2	3	2	2	2	2	2	2	2	2	1	2	2	2	2	2
ALG6, ALG8 glycosyltransferase family DOLICHYL GLYCOSYLTRANSFERASE	IPR004856	0	2	2	2	2	2	2	2	2	2	2	3	2	2	2	2	0	2	2	2	2	4	2	2
EXTENDED SYNAPTOTAGMIN-RELATED	IPR045050	3	2	2	0	2	6	5	0	6	1	2	0	0	1	7	0	5	1	0	1	2	0	1	2
NUCLEAR PORE COMPLEX PROTEIN SEC13 / SEH1 FAMILY MEMBER	IPR037363	2	2	2	1	1	2	2	2	1	2	2	2	1	2	2	2	2	2	2	2	2	1	2	6
LIPID PHOSPHATE PHOSPHATASE	IPR043216	4	5	2	3	1	4	2	2	2	0	4	3	2	2	1	1	1	0	0	2	2	1	1	1
Transketolase, thiamine diphosphate binding domain	IPR005474	2	3	5	2	1	1	1	2	1	2	2	2	2	3	1	2	1	3	1	2	1	2	2	2
NAC domain NAC A/B domain	IPR002715	2	2	0	2	3	2	2	1	2	2	1	2	2	4	2	1	2	2	2	2	2	2	2	2
PROTEIN TRICHOME BIREFRINGENCE-LIKE 9-RELATED	IPR029962	11	6	7	8	0	0	0	3	8	0	3	0	0	0	0	0	0	0	0	0	0	1	0	0
Hotdog acyl-CoA thioesterase (ACOT)-type domain	IPR033120	3	2	2	2	1	3	4	5	1	2	1	1	1	3	1	1	1	0	2	1	1	4	1	2
SOLUBLE NSF ATTACHMENT PROTEIN SNAP	IPR000744	2	2	3	1	1	2	2	2	2	2	2	1	1	2	2	2	2	2	3	2	1	2	3	2
Ku70/Ku80 beta-barrel domain	IPR006164	1	2	2	1	3	2	2	2	1	2	2	4	2	1	2	2	2	1	2	2	1	2	2	3
Chalcone isomerase-like	IPR016087	0	0	2	0	0	3	2	1	3	2	2	1	0	3	2	3	2	2	2	2	1	8	4	1
Domain of unknown function (DUF5600)	IPR040990	2	3	5	3	5	1	1	3	1	1	3	0	1	1	1	2	0	1	1	2	1	4	3	1
NAD(P) transhydrogenase beta subunit	IPR034300	2	2	4	2	2	2	1	2	0	3	2	0	1	2	3	1	0	4	1	3	0	2	2	4
ARGININE OR CREATINE KINASE	IPR000749	5	3	3	6	1	0	0	1	0	10	2	0	0	4	0	1	0	1	2	1	0	2	1	4
GABA-B RECEPTOR	IPR002455	8	3	1	4	0	0	0	0	0	8	0	0	0	0	0	2	0	0	0	5	0	5	1	2
GOLGI SNARE BET1-RELATED	IPR039897	4	2	2	3	2	2	2	2	0	1	1	1	1	3	2	2	2	1	3	3	1	1	2	2
tRNA N6-adenosine threonylcarbamoyltransferase TRNA N6-ADENOSINE THREONYLCARBAMOYLTRANSFERASE	IPR000905	2	2	1	3	2	2	0	1	2	2	2	2	2	2	3	2	2	2	2	2	2	2	2	2
Iron-sulfur cluster assembly protein	IPR002744	1	2	2	1	1	2	2	2	2	3	1	1	2	3	2	3	2	1	2	2	2	3	2	4
RUVB-RELATED REPTIN AND PONTIN	IPR027238	3	3	1	1	3	2	2	1	2	2	1	2	2	2	3	1	2	2	1	2	2	2	2	2
Protein of unknown function (DUF819) PROTEIN, PUTATIVE (DUF819)-RELATED	IPR008537	1	2	2	2	0	2	2	2	1	1	2	0	1	3	3	2	3	1	3	3	3	3	2	1
Cysteine--tRNA ligase [cysS]	IPR015803	2	3	2	0	1	1	2	2	2	2	3	4	3	2	2	2	2	0	1	2	2	2	2	2
Replication factor-A C terminal domain	IPR013955	2	2	5	2	2	2	2	2	2	2	3	1	1	2	2	1	3	1	2	1	2	1	1	3
Zinc finger CHY-type	IPR008913	1	2	3	0	0	3	1	2	2	2	1	1	4	4	1	1	1	1	1	4	2	2	4	2
LIPOYL SYNTHASE Lipoyl synthase [lipA]	IPR003698	2	2	0	1	3	2	2	2	2	1	5	2	2	2	2	2	2	2	2	2	2	1	2	1
Pyridoxamine 5'-phosphate oxidase	IPR011576	2	4	3	3	1	3	2	2	3	2	4	2	2	1	0	2	0	0	1	1	4	2	0	2
D-arabinono-1,4-lactone oxidase	IPR007173	5	3	3	4	1	2	1	2	2	4	5	1	1	0	1	2	2	2	0	1	1	1	1	2
LSM1	IPR044642	2	2	2	2	2	2	2	2	1	2	3	2	2	2	2	2	2	1	1	2	2	1	3	2
Ribosomal Proteins L2, C-terminal domain	IPR022669	2	2	2	2	1	2	2	2	2	2	2	3	3	3	2	1	2	3	1	1	2	1	1	2
N-LINKED OLIGOSACCHARIDE PROCESSING	IPR039794	2	3	6	2	2	1	1	4	2	1	4	1	1	1	1	3	1	2	3	1	1	1	1	2
Domain of unknown function (DUF4215)	IPR011936	0	2	2	3	0	0	0	1	0	7	1	0	0	16	0	0	0	1	0	0	0	0	0	15
RIBOSOMAL RNA SMALL SUBUNIT METHYLTRANSFERASE E RNA methyltransferase	IPR006700	1	2	2	2	2	1	1	2	1	2	3	1	3	2	2	2	2	2	1	2	2	2	3	2
Protein of unknown function (DUF726) TRANSMEMBRANE AND COILED-COIL DOMAIN-CONTAINING PROTEIN 4 TMCO4	IPR007941	2	2	0	1	2	1	0	1	2	4	4	2	4	4	1	2	2	4	1	1	2	2	2	1
Choline/Carnitine o-acyltransferase	IPR039551	4	4	3	3	0	0	0	6	0	0	5	0	0	8	0	0	0	6	0	2	0	2	2	0
26S proteasome subunit RPN7	IPR045135	2	2	2	0	2	2	2	2	2	2	4	2	2	2	2	2	2	2	0	2	2	2	2	2
Iron-containing alcohol dehydrogenase	IPR001670	3	2	1	2	1	2	3	0	0	6	4	4	1	2	2	3	1	0	0	1	2	1	1	5
RIBOSOMAL PROTEIN L17 Ribosomal protein L17 50S ribosomal protein L17 [rplQ]	IPR000456	2	3	0	2	2	2	2	2	2	2	3	2	2	1	2	2	2	2	1	2	2	2	2	2
Yippee zinc-binding/DNA-binding /Mis18, centromere assembly	IPR004910	2	3	1	1	0	3	2	0	4	2	2	3	3	6	3	3	0	2	0	2	1	1	1	2
ALANINE AMINOTRANSFERASE	IPR045088	3	2	1	2	2	2	2	1	2	1	2	1	1	4	1	2	1	2	1	2	2	3	2	3
ATP-sulfurylase	IPR024951	2	3	2	1	4	2	2	2	1	1	3	1	2	2	1	2	1	1	1	2	2	3	2	3
Elongation factor TS	IPR014039	2	2	1	2	2	2	2	2	2	3	3	2	1	2	2	2	2	2	1	1	1	2	2	2
HPP family	IPR007065	1	6	4	4	1	1	3	0	2	0	1	0	0	4	1	1	1	1	0	1	0	9	2	2
50S ribosomal protein L7/L12 [rplL] 39S RIBOSOMAL PROTEIN L12	IPR000206	2	2	1	2	4	1	2	2	1	3	3	2	1	2	2	0	2	2	0	3	1	2	2	3
eRF1 domain 2	IPR005141	2	2	2	1	2	2	2	2	2	3	2	2	2	2	2	2	2	2	1	2	2	1	2	2
Family of unknown function (DUF572) SPLICING FACTOR YJU2	IPR007590	2	2	2	2	2	2	2	2	2	2	2	2	1	1	2	3	2	2	2	2	1	2	2	2
FAMILY NOT NAMED	IPR005979	4	3	5	2	1	1	1	3	1	2	3	0	1	2	2	1	2	1	3	2	1	2	2	1
Monogalactosyldiacylglycerol (MGDG) synthase	IPR009695	0	4	1	1	3	0	1	3	1	2	4	1	3	3	1	1	1	1	0	4	4	1	3	2
Sodium:sulfate symporter transmembrane region	IPR001898	3	3	3	4	1	3	4	2	4	3	2	1	2	2	3	0	3	2	0	0	1	0	0	2
UDP-glucose/GDP-mannose dehydrogenase family, UDP binding domain	IPR014027	2	2	3	2	1	1	3	5	2	1	3	4	2	2	1	1	2	1	1	1	2	2	2	1
HNH endonuclease	IPR002711	2	7	4	2	0	1	2	3	1	1	11	0	0	2	1	2	1	3	1	0	1	0	0	1
TRANSKETOLASE	IPR033247	2	4	4	2	1	1	1	2	1	2	2	2	2	2	1	2	1	2	1	2	1	2	2	2
Phosphatidylethanolamine-binding protein	IPR008914	4	3	6	3	0	2	0	3	2	0	3	2	1	1	2	2	0	3	1	0	0	0	0	9
TPM domain	IPR007621	3	2	2	2	0	3	2	1	2	2	3	2	2	2	1	2	1	2	1	3	2	2	1	1
LARGE SUBUNIT GTPASE 1 HOMOLOG-RELATED	IPR043358	2	3	6	1	1	1	2	3	1	1	4	1	3	5	2	1	2	2	0	1	1	1	1	1
Sedlin, N-terminal conserved region TRAFFICKING PROTEIN PARTICLE COMPLEX SUBUNIT 2	IPR006722	3	2	0	2	1	0	2	1	2	2	2	3	2	2	2	2	1	2	2	4	2	2	2	1
HYPK UBA domain	IPR044034	3	3	2	1	0	2	2	3	1	1	2	2	2	2	2	1	1	3	2	1	3	2	2	2
AMINOBENZOATE/ANTHRANILATE SYNTHASE	IPR019999	2	2	2	1	2	3	1	2	1	2	2	2	2	2	2	1	2	3	1	3	2	1	2	2
NLE (NUC135) domain	IPR012972	2	2	2	2	1	2	2	2	2	2	2	1	2	2	2	2	2	1	2	2	1	3	2	2
Formamidopyrimidine-DNA glycosylase catalytic domain Formamidopyrimidine-DNA glycosylase N-terminal domain	IPR012319	2	3	3	2	2	0	1	3	1	1	6	2	0	3	2	1	1	2	1	2	2	1	2	2
Glycosyl hydrolases family 43	IPR006710	7	6	10	5	4	1	0	1	2	0	7	0	1	0	0	1	0	0	0	0	0	1	1	0
Nucleoside diphosphate kinase [ndk]	IPR001564	2	2	1	2	2	3	2	1	2	1	1	2	3	2	2	2	1	2	0	2	2	2	3	2
Protein of unknown function (DUF2470)	IPR019595	2	1	3	2	2	3	2	2	1	1	2	1	2	1	2	2	1	1	2	3	2	2	2	2
CARNITINE O-ACYLTRANSFERASE	IPR000542	3	4	3	3	0	0	0	6	0	0	5	0	0	8	0	0	0	6	0	2	0	2	2	0
5'-NUCLEOTIDASE DOMAIN-CONTAINING 5' nucleotidase family	IPR008380	3	2	4	1	2	2	3	2	2	1	2	2	1	2	1	2	1	3	1	2	1	2	2	1
SMALL NUCLEAR RIBONUCLEOPROTEIN F SNRNP-F	IPR016487	2	2	0	2	2	2	2	2	2	2	3	4	2	2	2	2	2	1	0	2	2	1	2	2
DIPHTHAMIDE BIOSYNTHESIS PROTEIN Putative diphthamide synthesis protein	IPR016435	1	2	4	0	1	2	2	2	2	2	2	2	2	2	2	2	2	2	2	2	2	1	2	2
Domain of unknown function (DUF3479)	IPR022571	4	2	2	1	1	2	1	1	3	2	2	2	2	2	2	2	2	2	1	2	1	2	2	2
Hemimethylated DNA-binding protein YccV like	IPR011722	6	6	5	6	0	3	1	3	3	1	4	0	1	1	0	0	0	2	1	1	0	1	0	2
PROTEIN AD-016-RELATED Subunit CCDC53 of WASH complex	IPR019309	2	3	3	1	10	0	0	1	0	0	1	0	0	1	0	0	1	0	9	4	0	5	4	0
RNA polymerase Rpb4	IPR005574	2	2	2	2	0	2	2	2	2	2	3	3	1	1	2	1	3	1	2	2	2	3	2	2
NADAR domain	IPR012816	1	5	5	6	0	1	2	1	1	2	8	0	1	6	1	1	1	2	1	0	0	0	0	2
Riboflavin kinase	IPR015865	2	2	1	2	2	2	2	2	2	2	4	1	1	2	2	2	2	2	1	2	2	2	2	1
Zinc finger AN1-type AN1-like Zinc finger	IPR000058	1	1	0	1	0	2	2	3	2	7	2	3	1	8	2	2	0	2	0	0	3	0	0	5
Protein of unknown function (DUF1501)	IPR010869	1	3	1	5	1	0	0	4	0	0	11	0	0	0	0	0	0	0	0	0	0	10	7	0
WLM domain WLM domain	IPR013536	2	3	1	2	0	1	1	4	2	1	2	3	2	2	2	1	1	1	2	2	1	1	2	6
ASPARTYL-TRNA SYNTHETASE	IPR004523	3	3	5	2	2	1	1	2	1	3	2	1	1	3	1	2	1	1	1	2	1	2	2	2
UNCHARACTERIZED	IPR024158	2	2	3	3	1	3	3	3	2	1	3	0	1	3	2	1	2	3	1	2	1	2	0	1
Polysaccharide pyruvyl transferase	IPR007345	7	1	4	3	1	9	0	0	0	6	0	0	2	0	0	0	0	1	0	5	1	1	2	3
Copper/zinc superoxide dismutase (SODC)	IPR001424	4	7	8	3	3	0	0	4	0	0	1	0	2	0	3	2	3	1	1	1	0	3	0	0
Dis3-like cold-shock domain 2 (CSD2)	IPR041505	2	2	3	0	1	3	1	0	2	1	3	2	1	1	3	1	3	1	1	3	5	1	2	2
SLIDE	IPR015195	2	3	2	2	3	1	1	2	1	1	5	1	1	1	1	2	1	1	2	3	1	2	2	2
EXPORTIN 4,7-RELATED	IPR044189	2	2	2	1	1	1	3	2	2	2	1	0	1	4	2	2	1	4	2	2	2	2	2	1
FIST N domain	IPR013702	3	5	5	6	2	0	3	2	2	0	1	1	5	2	0	0	1	1	1	1	3	0	0	1
RNA 3' TERMINAL PHOSPHATE CYCLASE	IPR000228	6	2	1	2	1	2	1	1	2	2	3	1	2	2	2	2	1	1	2	2	2	1	1	2
FRUCTOSE-BISPHOSPHATE ALDOLASE CLASS 2	IPR006411	2	3	1	4	1	0	0	3	0	1	7	0	1	2	1	0	1	2	2	4	1	3	3	0
Galactose mutarotase-like	IPR025887	3	4	5	1	1	2	2	3	6	2	2	3	1	1	1	2	2	0	0	1	1	0	1	1
NUDIX HYDROLASE RELATED	IPR003293	5	4	3	4	0	1	1	2	1	0	7	0	0	2	1	2	2	2	0	2	0	2	2	1
PTERIN-4-ALPHA-CARBINOLAMINE DEHYDRATASE Pterin 4 alpha carbinolamine dehydratase	IPR001533	3	1	1	3	2	1	2	1	3	3	2	2	0	2	2	3	2	1	1	1	1	3	1	2
ATP cone domain ATP-cone domain	IPR005144	3	3	2	3	6	1	1	2	1	0	2	1	1	2	1	2	1	3	0	2	1	1	2	2
SKP1	IPR016897	1	1	0	1	1	2	1	1	2	6	1	1	2	2	1	1	1	1	0	3	2	4	4	4
CAAX PRENYL PROTEASE 1	IPR027057	2	2	2	2	2	3	2	2	1	2	3	2	2	2	1	2	0	1	2	1	2	2	2	2
PROTEIN MGTC MgtC family	IPR003416	5	3	1	3	2	0	0	1	0	1	9	0	3	0	1	1	0	2	1	1	3	1	4	1
Protein of unknown function (DUF1275)	IPR010699	3	4	3	3	1	0	0	4	0	0	7	0	0	0	0	4	0	0	5	4	1	1	1	0
RIBOSOMAL PROTEIN S15, BACTERIAL AND ORGANELLAR 30S ribosomal protein S15 [rpsO]	IPR005290	4	2	0	2	2	2	2	2	1	2	3	2	1	1	2	1	1	2	2	2	2	2	2	2
Electron transfer flavoprotein domain	IPR014730	2	2	1	2	2	2	2	2	2	1	2	2	2	2	0	2	0	2	2	2	2	3	2	3
Chitin-binding type-2 domain Chitin binding Peritrophin-A domain	IPR002557	0	0	0	0	0	3	1	0	0	0	0	0	0	0	0	0	0	0	0	1	0	16	24	1
FOLYLPOLYGLUTAMATE SYNTHASE-RELATED	IPR001645	3	2	2	2	1	2	1	2	2	1	2	1	1	3	2	3	3	2	1	2	1	2	2	1
PUA-like domain	IPR025980	2	3	2	1	3	2	2	2	1	1	3	1	2	2	1	2	1	1	1	2	2	2	2	3
Bifunctional protein FolD [folD]	IPR000672	3	0	3	3	2	2	2	1	1	2	3	2	2	1	3	1	3	1	1	1	2	3	1	2
Importin beta binding domain IBB domain	IPR002652	3	3	3	2	2	1	1	3	1	0	6	2	1	1	1	2	1	3	1	2	2	0	2	1
RibD C-terminal domain	IPR002734	2	2	1	2	1	1	1	2	1	4	3	1	2	2	1	2	1	2	2	2	2	2	2	2
Protein of unknown function (DUF2499)	IPR019634	2	3	4	3	2	1	1	3	1	2	2	0	1	2	3	0	3	2	2	2	1	2	1	1
PB1 domain PB1 domain	IPR000270	3	3	1	3	0	1	0	1	1	3	1	0	2	7	6	0	2	4	1	1	3	1	0	1
SWIB/MDM2 domain SWIB/MDM2 domain	IPR003121	0	1	1	1	2	2	2	1	2	2	1	2	4	2	2	3	1	2	0	2	5	1	1	4
Dimerisation and cyclophilin-binding domain of Mon2	IPR032629	1	2	6	1	0	1	2	2	2	2	2	2	2	5	1	2	1	1	1	3	2	0	2	2
Uncharacterized protein conserved in bacteria (DUF2237) SLR1628 PROTEIN	IPR018714	4	6	3	3	1	1	1	3	0	2	5	0	1	2	1	1	0	2	0	1	0	2	2	2
Creatinase/Prolidase N-terminal domain	IPR000587	2	2	4	1	2	1	1	2	1	4	2	3	2	2	1	2	2	2	1	1	2	1	1	3
SIS domain SIS domain	IPR001347	2	2	2	2	1	2	1	2	2	2	2	2	1	2	1	2	1	2	1	1	1	4	5	1
Domain amino terminal to FKBP-type peptidyl-prolyl isomerase	IPR000774	5	4	4	4	1	0	0	9	0	0	5	1	1	1	1	0	1	1	0	4	0	2	0	1
MT-A70 MT-A70-like family	IPR007757	3	3	2	2	1	3	4	3	5	3	3	3	0	0	1	3	2	1	1	0	0	0	0	3
Cytochrome c6 [petJ] CYTOCHROME C6, CHLOROPLASTIC	IPR023655	5	4	3	2	2	2	2	1	1	3	2	1	0	2	1	1	1	2	2	2	1	1	2	2
SIALIDASE	IPR026856	6	12	10	6	0	0	0	3	0	0	4	0	0	0	0	0	0	5	0	0	0	0	0	0
BTB/POZ AND MATH DOMAIN-CONTAINING PROTEIN 1	IPR045005	0	0	1	0	1	0	1	0	1	1	1	0	0	1	1	1	1	0	0	0	0	27	3	1
POLYMYOSITIS/SCLERODERMA AUTOANTIGEN-RELATED	IPR045092	0	3	2	1	1	2	2	1	2	2	1	1	1	2	1	1	1	3	1	3	2	4	3	3
DHHA1 domain	IPR003156	2	3	3	1	2	1	2	2	2	2	2	1	2	2	1	1	2	1	1	2	2	2	2	2
RNA 3'-terminal phosphate cyclase	IPR023797	6	2	1	2	1	2	1	1	2	2	3	1	2	2	2	2	1	1	2	2	2	1	1	2
Dihydroorotate dehydrogenase	IPR005720	1	3	2	0	1	3	3	1	2	5	2	2	1	1	1	1	1	1	1	2	1	3	2	4
Dynamin GTPase effector domain	IPR003130	3	2	2	2	2	2	5	3	3	2	1	1	2	1	2	1	1	2	3	1	1	0	1	2
CASEIN KINASE II SUBUNIT BETA Casein kinase II regulatory subunit	IPR000704	2	2	4	2	2	1	0	2	1	3	2	1	1	2	1	3	1	1	3	3	1	1	2	2
Syntaxin	IPR006011	2	2	1	1	1	1	2	3	1	6	1	3	2	3	3	1	2	1	0	1	3	1	2	2
Ribosomal Proteins L2, RNA binding domain	IPR022666	2	2	2	2	1	2	2	2	2	2	2	3	2	3	2	1	2	2	1	1	2	1	1	2
PLD-like domain	IPR025202	4	3	3	2	3	1	1	2	0	2	8	0	1	0	4	0	3	3	0	0	0	2	3	1
Glucose inhibited division protein A	IPR040131	3	2	2	2	1	2	1	2	2	1	3	1	3	1	3	1	3	2	1	1	3	2	1	1
Fumble PANTOTHENATE KINASE	IPR004567	1	3	3	0	0	2	2	2	2	2	6	2	1	1	3	1	3	3	2	1	1	0	1	3
Ditrans,polycis-undecaprenyl-diphosphate synthase ((2E,6E)-farnesyl-diphosphate specific) [uppS] DEHYDRODOLICHYL DIPHOSPHATE SYNTHASE FAMILY MEMBER Putative undecaprenyl diphosphate synthase	IPR001441	3	2	3	1	2	2	2	2	1	1	3	2	1	2	2	2	2	2	1	2	2	1	2	1
Peptidase family M13	IPR018497	3	5	2	2	0	0	0	0	0	1	1	1	2	17	1	0	0	1	0	1	2	0	1	5
TIP49 AAA-lid domain	IPR041048	3	3	1	1	3	2	2	1	2	2	1	2	2	2	3	1	2	1	0	2	2	2	2	2
INOSINE TRIPHOSPHATE PYROPHOSPHATASE/HAM1 PROTEIN Ham1 family	IPR002637	1	3	1	0	2	1	2	2	1	3	3	2	1	2	3	2	4	1	2	2	1	1	3	1
G-protein coupled receptors family 3 7 transmembrane sweet-taste receptor of 3 GCPR	IPR017978	9	3	1	4	0	0	0	0	0	0	0	0	0	0	0	2	0	0	0	7	0	6	2	0
MITOTIC SPINDLE ASSEMBLY CHECKPOINT PROTEIN MAD2	IPR045091	1	2	4	2	2	2	1	2	1	2	2	2	2	2	2	1	1	2	1	2	2	2	2	1
Glutamate synthase central domain	IPR006982	3	2	2	3	2	2	2	2	2	4	2	1	0	2	2	2	1	2	0	2	0	1	2	2
TRAFFICKING PROTEIN PARTICLE COMPLEX SUBUNIT Sybindin-like family	IPR007233	2	2	2	2	0	2	2	2	2	2	1	2	2	2	2	1	2	2	1	2	2	2	2	2
FMN-dependent dehydrogenase	IPR000262	1	2	3	1	6	1	1	1	1	3	0	4	1	1	2	2	1	1	1	2	2	2	2	2
FUN14 family FUN14 DOMAIN CONTAINING	IPR007014	2	2	1	2	0	0	1	3	1	2	4	1	2	2	1	2	0	2	2	2	4	1	2	4
Methyltransferase TRM13	IPR007871	4	4	3	3	1	1	1	4	1	1	7	0	1	2	1	1	1	3	1	1	0	1	1	1
SYNAPTOBREVIN FAMILY MEMBER	IPR016444	6	5	3	5	4	0	2	4	0	1	7	0	0	0	2	0	0	2	0	0	1	1	1	1
C-terminal associated domain of TOPRIM	IPR031660	4	2	5	1	1	1	1	2	1	1	2	2	1	2	1	1	1	1	0	2	3	3	3	2
PIK helical domain Phosphoinositide 3-kinase family, accessory domain (PIK domain)	IPR001263	2	2	4	0	1	1	3	2	2	4	1	1	1	3	2	2	1	1	5	1	1	0	1	3
CLEAVAGE/POLYADENYLATION FACTOR IA SUBUNIT CLP1P	IPR045116	2	2	2	2	2	2	2	1	2	2	4	2	2	1	1	0	2	3	1	2	2	1	1	2
NAD synthase	IPR022310	2	3	2	3	1	0	1	2	2	1	3	3	2	1	1	2	2	2	1	2	1	2	3	1
FIST C domain	IPR019494	4	7	4	4	3	1	1	2	2	0	0	1	2	2	1	1	1	0	3	1	2	1	0	1
XANTHINE DEHYDROGENASE	IPR016208	0	4	2	0	2	2	1	2	3	2	8	1	1	1	0	2	0	1	2	1	1	1	1	6
Family of unknown function (DUF5695)	IPR043750	5	8	9	6	0	0	0	6	1	0	9	0	0	0	0	0	0	1	0	0	0	0	0	0
Ribosomal protein S2	IPR001865	3	3	2	2	2	1	2	2	1	1	2	3	2	3	1	1	1	3	1	1	2	1	2	1
PUROMYCIN-SENSITIVE AMINOPEPTIDASE	IPR012779	2	3	1	1	1	1	3	4	1	2	2	1	1	3	2	1	3	2	1	1	1	4	2	1
SWIRM domain SWIRM domain	IPR007526	1	1	2	1	1	3	1	1	3	1	1	4	4	5	4	0	4	0	0	2	1	0	1	2
Animal haem peroxidase Animal heme peroxidase superfamily	IPR019791	0	0	0	1	0	0	0	0	0	2	5	0	28	0	2	0	0	1	0	0	2	0	1	3
30S RIBOSOMAL PROTEIN S10 FAMILY MEMBER 30S ribosomal protein S10 [rpsJ]	IPR001848	2	1	2	2	1	4	3	2	3	2	1	1	2	2	2	1	2	4	1	1	1	1	1	2
OS01G0585100 PROTEIN Protein of unknown function (DUF2838)	IPR021261	3	3	5	4	1	2	2	1	2	4	4	1	0	1	2	1	1	1	0	1	1	0	2	2
METHYLTRANSFERASE	IPR027034	2	2	2	3	1	2	2	2	2	1	4	1	1	1	2	2	2	1	0	2	2	1	2	3
TIP49 P-loop domain	IPR010339	3	1	1	1	3	2	2	1	3	2	0	2	2	2	2	1	2	2	1	2	2	2	2	2
BREAST CANCER TYPE 1 SUSCEPTIBILITY PROTEIN BRCA1	IPR031099	2	4	2	1	0	4	2	3	0	1	1	1	2	2	2	2	2	3	0	1	4	1	2	2
Paraquat-inducible protein A	IPR007498	2	3	6	2	3	0	0	3	0	0	4	0	0	1	2	1	1	1	1	4	0	4	2	0
Mitochondrial pyruvate carriers	IPR005336	3	3	0	4	1	2	2	2	2	2	1	2	2	2	2	2	2	1	0	1	2	1	2	2
S-ADENOSYL-METHYLTRANSFERASE MRAW MraW methylase family	IPR002903	2	3	3	3	3	1	1	3	1	1	3	1	1	1	2	1	2	3	3	1	1	2	1	1
AAA lid domain	IPR041628	1	1	1	1	1	3	3	1	2	2	1	2	1	2	4	1	4	2	2	1	1	0	3	3
HOMEODOMAIN-LIKE SUPERFAMILY PROTEIN-RELATED	IPR044841	3	2	5	4	0	3	3	6	2	0	6	1	2	0	2	1	1	3	0	0	1	0	0	0
Poly(A) polymerase central domain	IPR007012	1	2	2	1	2	1	1	2	1	3	3	1	2	4	1	2	2	1	1	2	2	3	2	1
Lysine--tRNA ligase [lysS]	IPR002313	2	2	1	1	2	1	2	2	2	3	1	2	2	4	2	2	2	1	1	2	2	0	2	2
Roadblock/LC7 domain	IPR004942	2	3	3	3	2	1	1	3	0	3	2	0	0	4	2	3	0	3	3	1	0	1	3	2
METHYLTRANSFERASE-RELATED	IPR039769	2	4	1	4	1	1	1	4	1	2	6	1	1	1	1	1	1	4	1	1	1	2	1	1
CYTOCHROME C	IPR002327	5	3	0	2	3	1	1	1	1	2	10	0	1	1	1	1	1	1	1	1	0	2	1	3
RAB GDP/GTP EXCHANGE FACTOR	IPR045046	4	5	2	4	2	1	1	4	1	1	0	0	0	4	1	2	1	1	3	2	0	0	2	2
CELL CYCLE CONTROL PROTEIN 50 LEM3 (ligand-effect modulator 3) family / CDC50 family	IPR005045	3	4	3	4	2	1	2	1	2	4	1	1	2	2	1	1	1	1	2	1	1	0	1	3
GLUTATHIONE S-TRANSFERASE L1	IPR044629	5	3	0	4	4	1	1	3	1	3	3	0	1	1	2	1	2	2	1	1	3	0	0	2
DNA ANNEALING HELICASE AND ENDONUCLEASE ZRANB3 FAMILY MEMBER	IPR030101	2	4	1	1	1	2	1	2	2	0	3	0	2	3	1	3	1	1	1	2	1	0	4	2
Glycosyl hydrolases family 38 N-terminal domain	IPR000602	4	6	6	4	1	1	1	2	1	1	2	2	1	1	0	1	0	1	1	2	0	0	2	1
FMN-dependent alpha-hydroxy acid dehydrogenase domain	IPR037396	1	2	3	1	6	1	1	1	1	3	0	4	1	1	2	2	1	1	1	2	2	2	2	2
PRE-MRNA SPLICING FACTOR PRP8	IPR027652	1	2	3	1	1	1	1	2	1	1	2	1	2	1	1	1	1	6	1	1	1	3	8	1
Alanine--tRNA ligase [alaS]	IPR023033	2	3	2	2	2	0	2	2	2	3	3	1	2	1	2	2	2	0	0	2	2	2	2	2
Eukaryotic protein of unknown function (DUF829) UNCHARACTERIZED	IPR008547	3	1	2	1	1	3	2	1	1	2	7	1	3	3	2	1	2	1	0	3	3	0	0	0
ANDROGEN INDUCED INHIBITOR OF PROLIFERATION AS3 / PDS5-RELATED	IPR039776	1	3	2	1	0	4	1	7	4	1	1	1	3	1	2	2	3	0	1	2	1	0	1	1
CH-like domain in sperm protein	IPR010441	3	2	5	2	0	1	4	1	1	3	3	0	0	4	4	1	0	5	2	0	0	0	0	3
Glycosyl hydrolase family 10 Glycosyl hydrolases family 10 (GH10) domain	IPR001000	1	1	7	0	0	0	0	1	0	0	5	0	0	0	0	0	0	5	0	1	0	2	1	19
Lon protease (S16) C-terminal proteolytic domain Lon proteolytic domain	IPR008269	3	3	3	2	1	2	1	3	1	1	3	1	2	1	2	3	2	2	1	1	1	1	1	2
Ubiquitin elongating factor core	IPR019474	4	3	4	1	0	2	1	3	1	1	3	1	1	2	2	1	1	4	0	1	1	2	1	3
Ribosomal L28 family 39S RIBOSOMAL PROTEIN L28, MITOCHONDRIAL	IPR026569	2	2	1	1	1	2	2	2	2	2	3	2	1	2	2	1	2	2	1	2	1	2	2	2
Ribosomal protein S4/S9 N-terminal domain	IPR001912	2	2	1	2	1	1	2	2	1	2	2	2	2	3	1	1	2	2	1	2	2	2	2	2
Phosphoglucomutase/phosphomannomutase, C-terminal domain	IPR005843	3	2	1	1	1	2	3	3	3	2	3	2	2	3	2	1	2	0	0	1	2	0	1	3
AD-003 - RELATED AdoMet dependent proline di-methyltransferase	IPR008576	6	5	3	3	0	1	1	5	1	2	3	1	0	2	1	1	1	2	1	1	1	0	1	1
DPH3 HOMOLOG-RELATED	IPR044248	2	2	1	1	1	1	3	1	3	1	3	1	1	2	3	2	2	2	0	2	3	2	2	1
Sodium:neurotransmitter symporter family SODIUM/CHLORIDE DEPENDENT TRANSPORTER Sodium:neurotransmitter symporter family	IPR000175	2	2	2	2	1	0	0	0	0	8	4	0	2	2	1	0	0	3	1	1	0	4	0	6
Beta-eliminating lyase	IPR001597	3	3	3	1	2	0	1	2	1	4	2	0	0	2	1	2	1	3	1	3	1	2	2	3
Methylenetetrahydrofolate reductase	IPR003171	1	4	2	2	1	2	1	4	1	1	4	1	1	2	0	3	1	2	1	2	2	2	2	1
Probable zinc-ribbon domain	IPR025306	13	4	1	3	0	0	0	9	0	0	5	0	0	3	1	0	1	2	1	0	0	0	0	0
Class II Aldolase and Adducin N-terminal domain	IPR001303	0	3	1	0	3	1	0	0	2	5	6	1	0	1	1	2	1	1	1	2	1	2	3	3
Fcf1	IPR006984	1	2	2	2	1	2	2	2	1	2	3	1	1	2	2	2	2	2	2	2	2	1	2	2
MITOCHONDRIAL IMPORT INNER MEMBRANE TRANSLOCASE SUBUNIT TIM22	IPR039175	1	1	1	1	1	4	3	0	3	1	1	1	3	3	3	2	3	1	1	1	2	3	2	1
GLUCOSE INHIBITED DIVISION PROTEIN A	IPR002218	3	2	2	2	1	2	1	2	2	1	3	1	3	1	2	1	2	3	1	1	2	2	1	1
PROTEIN LOW PSII ACCUMULATION 3, CHLOROPLASTIC	IPR044687	2	2	1	3	1	2	2	2	1	1	1	2	2	2	2	2	2	2	1	2	2	1	3	1
Vesicle transport v-SNARE protein N-terminus	IPR007705	5	5	4	4	1	1	1	3	1	2	1	0	0	1	1	1	1	2	0	2	1	2	1	3
BETA-GALACTOSIDASE RELATED	IPR001944	0	2	1	0	3	1	0	1	7	4	2	8	3	1	0	0	0	1	1	1	2	0	0	5
Pyrroline-5-carboxylate reductase dimerisation	IPR029036	2	2	1	2	2	2	1	1	2	1	3	2	2	2	2	2	1	1	2	2	2	2	2	1
RAD54-LIKE	IPR044574	1	2	1	1	8	1	1	1	0	0	13	1	1	4	0	0	0	2	2	0	0	0	1	0
Nuclear transport factor 2 (NTF2) domain	IPR002075	1	1	1	1	1	2	3	1	1	2	3	2	1	3	2	2	2	1	1	2	2	2	2	3
GTPASE ERA GTPase Era [era]	IPR005662	2	2	2	2	1	2	1	0	2	2	3	2	2	1	2	1	3	2	1	2	2	1	2	2
Tyrosine phosphatase family	IPR026893	3	4	3	3	1	1	0	3	2	3	4	0	1	2	1	1	0	2	0	2	2	1	1	2
Ribosomal protein L6	IPR020040	2	2	1	2	2	2	2	2	3	1	2	3	2	2	2	1	2	2	1	1	3	1	1	1
PROTEIN CLT2, CHLOROPLASTIC CRT-like, chloroquine-resistance transporter-like	IPR013936	2	3	3	1	2	0	1	3	1	2	1	0	1	1	0	4	0	3	2	1	2	3	1	5
Gar1/Naf1 RNA binding region	IPR007504	1	1	3	2	2	2	1	1	2	2	3	2	2	2	2	2	1	1	1	2	2	1	2	2
Arginine--tRNA ligase [argS] ARGINYL-TRNA SYNTHETASE	IPR001278	2	2	2	1	2	1	1	2	1	3	2	2	1	3	2	2	2	2	2	2	1	1	2	1
Kelch motif	IPR011498	5	2	5	6	0	0	1	4	1	3	0	1	0	5	0	0	3	4	1	0	1	0	0	1
TRUD domain	IPR011760	0	2	3	0	0	1	0	3	1	2	3	1	1	8	1	1	1	2	1	2	2	2	2	3
KH-domain-like of EngA bacterial GTPase enzymes, C-terminal	IPR032859	2	1	4	0	2	2	2	2	2	2	2	2	2	1	1	2	1	2	2	2	2	0	2	2
MMPL family	IPR004869	2	6	3	5	0	0	0	4	0	0	16	0	0	1	0	0	1	1	2	1	0	0	0	2
Pre-PUA-like domain	IPR041366	2	3	3	2	1	2	1	3	2	3	3	2	1	1	2	1	2	3	0	1	1	1	1	2
Peptidase family C78	IPR012462	3	3	3	4	0	2	2	3	2	2	5	1	2	1	1	1	0	2	0	1	2	1	0	2
Low psii accumulation1 / Rep27	IPR021883	3	2	2	1	2	2	1	1	0	2	1	1	1	2	2	2	2	2	2	3	1	2	2	2
CONDENSIN	IPR026971	1	2	5	1	1	1	1	2	1	1	2	1	2	2	1	1	1	4	1	2	2	3	2	1
DALR anticodon binding domain	IPR008909	2	2	2	1	2	1	1	2	1	2	2	2	1	3	2	2	2	2	2	2	1	1	2	1
DNA repair metallo-beta-lactamase	IPR011084	2	2	4	2	0	3	2	1	2	2	2	1	1	3	2	2	2	2	1	1	1	0	1	2
Galactokinase galactose-binding	IPR019539	3	3	4	0	0	0	2	2	2	2	4	2	2	2	2	3	1	1	0	2	1	1	1	2
Ig-like domain	IPR007110	0	5	0	2	1	2	0	3	0	3	2	0	3	5	0	0	0	3	1	0	1	3	1	3
Type I phosphodiesterase / nucleotide pyrophosphatase	IPR002591	2	4	5	2	0	0	2	3	0	4	1	0	2	3	3	1	2	1	0	1	1	2	2	1
RNA-BINDING PROTEIN RELATED	IPR031150	3	4	5	4	1	1	2	0	1	1	3	1	1	1	3	2	2	1	0	1	1	1	1	2
Nudix hydrolase domain	IPR040618	4	4	3	4	0	1	1	2	1	0	5	0	0	2	1	1	2	2	1	2	0	2	2	1
Peroxisomal biogenesis factor 11 (PEX11)	IPR008733	3	3	4	2	0	1	1	2	2	1	3	2	1	2	2	1	2	1	0	2	2	2	2	1
Saposin B type domain	IPR008139	5	7	7	4	0	2	2	3	2	1	0	0	0	3	2	0	2	1	1	0	1	0	0	0
MaoC like domain	IPR002539	2	2	1	1	1	1	3	1	2	2	6	0	0	1	2	3	3	2	1	1	0	1	3	2
SMALL NUCLEAR RIBONUCLEOPROTEIN	IPR044641	2	2	1	1	3	1	2	1	2	1	1	2	2	2	2	2	2	2	2	2	2	2	1	1
HEPARAN SULFATE 2-O-SULFOTRANSFERASE	IPR007734	9	7	4	10	2	0	0	0	0	0	3	0	0	2	0	0	0	1	3	2	0	0	0	0
Copper amine oxidase, enzyme domain	IPR015798	4	6	0	1	1	2	3	0	4	4	5	3	1	0	1	2	0	0	0	1	1	0	0	2
Hydroxyacylglutathione hydrolase C-terminus	IPR032282	2	2	2	1	2	1	2	2	2	2	2	2	1	2	2	1	2	3	2	1	2	1	2	2
NUCLEOPORIN	IPR037665	1	1	0	0	1	1	1	2	1	8	1	1	6	1	3	1	2	2	3	1	1	1	1	2
4TM region of pyridine nucleotide transhydrogenase, mitoch	IPR024605	2	2	4	2	2	2	1	2	0	3	2	0	1	2	1	1	0	1	1	3	0	2	2	4
mttA/Hcf106 family	IPR003369	3	2	7	2	0	2	2	2	1	1	4	1	2	1	2	1	2	1	0	1	2	1	2	0
Gamma-butyrobetaine hydroxylase-like, N-terminal	IPR010376	2	4	3	2	1	2	1	3	1	3	2	1	1	2	0	2	0	2	1	1	2	0	1	5
EsV-1-7 cysteine-rich motif	IPR043822	0	0	0	0	0	0	0	0	4	0	0	0	0	36	0	1	0	2	0	0	0	0	0	0
UDP-GLUCOSE GLYCOPROTEIN:GLUCOSYLTRANSFERASE	IPR009448	2	3	8	2	2	1	0	2	1	1	5	1	1	1	1	1	2	1	1	1	1	0	1	1
QUIESCIN Q6-RELATED SULFHYDRYL OXIDASE	IPR039798	2	5	3	3	0	1	1	2	1	2	2	0	0	0	1	1	1	1	1	3	0	5	5	0
DEHYDROGENASE RELATED	IPR027110	1	2	0	1	2	2	2	2	2	1	2	2	1	2	2	2	2	1	2	2	1	3	3	1
GXGXG motif	IPR002489	5	2	2	2	2	1	2	2	2	2	1	1	0	2	2	2	1	2	0	2	0	2	2	2
tRNA synthetases class I (R)	IPR035684	2	2	2	1	2	1	1	2	1	3	2	2	1	3	2	2	2	1	2	2	1	1	2	1
KOW motif	IPR005824	2	3	0	4	2	3	4	1	3	2	2	0	2	0	2	3	2	1	1	2	1	0	1	0
Ketopantoate reductase PanE/ApbA	IPR013332	1	4	3	1	2	0	1	2	0	2	2	3	1	2	0	2	0	2	1	2	3	4	0	4
BETA-GLUCAN SYNTHESIS-ASSOCIATED PROTEIN KRE6-RELATED Beta-glucan synthesis-associated protein (SKN1)	IPR005629	4	3	8	2	2	3	1	1	0	0	3	0	0	0	0	1	0	2	2	3	0	3	2	0
S-adenosyl-L-homocysteine hydrolase ADENOSYLHOMOCYSTEINASE S-inosyl-L-homocysteine hydrolase [ahcY]	IPR000043	2	4	0	2	1	1	1	5	1	1	3	1	7	1	1	1	1	1	1	1	1	2	2	1
ALPHA-KETOGLUTARATE-DEPENDENT DIOXYGENASE ALKB HOMOLOG 6	IPR032862	4	5	4	3	1	1	1	3	1	1	2	1	1	1	2	2	1	1	2	1	1	1	1	1
Ribosomal protein S7p/S5e	IPR023798	2	2	2	2	1	2	2	2	1	1	1	6	2	2	1	1	1	3	0	1	2	1	1	1
Ketopantoate reductase PanE/ApbA C terminal	IPR013752	1	4	2	1	2	0	1	2	0	2	1	3	1	2	0	2	1	2	1	2	3	3	1	3
Histidinol dehydrogenase HISTIDINOL DEHYDROGENASE HDH	IPR012131	2	1	4	2	1	1	1	2	1	2	6	1	1	2	1	2	1	2	0	2	1	1	1	2
Skp1 family, dimerisation domain	IPR016072	1	2	1	1	1	2	1	1	2	4	1	1	1	2	1	1	1	1	1	2	1	2	4	3
Expansin, family-45 endoglucanase-like domain	IPR007112	0	0	0	0	0	12	11	0	10	0	1	0	0	0	2	0	3	0	0	0	0	2	0	0
BTB/POZ DOMAIN-CONTAINING ADAPTER FOR CUL3-MEDIATED RHOA DEGRADATION PROTEIN FAMILY MEMBER	IPR045068	4	5	5	3	1	0	0	3	1	1	4	1	0	1	1	0	0	2	0	0	0	7	1	1
Ribonuclease T2 family RIBONUCLEASE T2	IPR001568	3	3	3	3	1	5	1	4	1	2	4	0	1	1	1	1	1	2	0	0	0	1	1	1
NUCLEOPORIN	IPR037637	1	1	0	0	1	1	1	2	1	8	1	1	6	1	3	1	2	1	3	1	1	1	1	2
VESICLE-ASSOCIATED MEMBRANE PROTEIN-ASSOCIATED PROTEIN	IPR016763	3	3	1	3	1	2	1	1	1	1	3	3	3	0	1	2	1	1	0	1	3	1	2	3
Diphthamide synthase	IPR002761	1	2	2	1	2	1	1	1	1	3	4	1	2	1	2	2	1	2	1	2	1	1	3	1
IOJAP SUPERFAMILY ORTHOLOG Ribosomal silencing factor RsfS [rsfS]	IPR004394	1	2	3	1	0	2	2	1	1	2	2	2	2	2	2	2	2	2	1	2	2	1	2	2
MutS domain II	IPR007860	2	2	2	2	1	0	1	2	3	1	2	4	3	4	2	1	3	0	1	0	2	0	1	3
Magnesium chelatase, subunit ChlI	IPR000523	1	1	2	2	1	1	3	1	2	2	0	2	1	2	4	0	4	2	2	1	1	0	3	2
COPPER AMINE OXIDASE	IPR000269	4	5	0	1	1	2	3	0	4	4	5	3	1	0	1	2	0	0	0	1	1	0	0	2
60S/50S RIBOSOMAL PROTEIN L6/L9	IPR000702	2	2	1	2	2	2	2	1	3	1	2	2	2	2	2	1	2	2	1	1	3	1	1	1
Carbamoyl-phosphate synthetase large chain, oligomerisation domain	IPR005480	2	2	2	2	2	1	1	2	1	1	2	2	2	2	1	2	1	1	2	2	2	2	2	1
UNCHARACTERIZED PROTEIN YJBQ-RELATED Uncharacterised protein family UPF0047	IPR001602	2	1	2	1	0	3	3	3	2	1	2	0	1	1	2	2	2	2	2	2	1	3	1	1
RecA family 2	IPR020587	2	2	0	2	0	0	3	2	0	2	0	4	2	2	3	0	3	2	1	2	2	1	1	4
XYLOSYLTRANSFERASE OXT	IPR043538	2	5	7	4	0	0	0	4	0	0	2	2	1	1	0	2	0	2	0	2	2	2	2	0
Glycosyl hydrolases family 35	IPR031330	0	2	1	0	3	1	0	1	7	4	1	7	3	1	0	0	0	1	1	1	2	0	0	5
SCC1 / RAD21 FAMILY MEMBER	IPR039781	1	1	3	1	1	1	4	1	2	2	2	2	2	2	1	2	2	1	1	1	3	1	1	2
TATA-box-binding protein [tbp] Transcription factor TFIID (or TATA-binding protein, TBP) TATA-BOX BINDING PROTEIN	IPR000814	2	2	4	1	1	1	1	1	1	2	1	1	1	10	1	1	1	2	1	1	2	0	1	2
ALKYLATED DNA REPAIR PROTEIN ALKB-RELATED	IPR004574	2	4	3	3	2	1	2	2	1	3	4	0	0	1	3	1	1	2	2	1	0	1	0	2
Glycosyltransferase family 28 N-terminal domain	IPR004276	5	1	5	3	1	1	1	3	0	6	5	0	0	0	1	1	0	4	0	1	0	2	0	1
N-terminal domain of CBF1 interacting co-repressor CIR	IPR019339	1	2	2	2	1	2	1	2	1	2	5	1	1	1	2	2	1	1	2	2	1	3	2	1
CCAAT-BINDING TRANSCRIPTION FACTOR-RELATED	IPR027113	4	3	2	7	2	1	1	3	1	1	2	1	1	2	1	1	1	1	1	1	1	1	1	1
Glycosyl hydrolase family 7 1,4-BETA-D-GLUCAN CELLOBIOHYDROLASE B	IPR001722	1	10	11	4	1	0	0	8	0	0	5	0	0	0	0	0	0	0	1	0	0	1	0	0
mRNA cleavage and polyadenylation factor CLP1 P-loop	IPR032319	1	2	2	2	2	2	2	1	2	2	3	2	2	1	1	0	2	2	1	2	2	1	1	2
Ceramidase ALKALINE CERAMIDASE 3	IPR008901	6	6	7	4	1	0	0	3	0	0	11	0	0	1	0	0	0	0	1	1	0	0	0	0
UNCHARACTERIZED	IPR017939	4	2	1	4	1	1	2	2	1	0	5	2	1	2	3	0	1	2	1	2	1	2	1	0
Uracil DNA glycosylase superfamily	IPR005122	2	2	2	2	4	1	2	2	1	1	2	1	2	2	1	2	1	2	0	2	2	0	2	1
SGS domain SGS domain	IPR007699	3	3	1	3	2	1	1	3	1	2	2	1	1	2	1	1	1	3	1	1	0	2	2	2
AAA domain	IPR038727	6	3	2	3	2	0	0	5	0	1	6	0	1	2	0	2	0	1	2	1	1	1	1	0
Septin Septin-type guanine nucleotide-binding (G) domain	IPR030379	2	6	2	3	0	2	2	4	2	0	9	0	0	2	0	1	0	2	1	0	1	0	0	1
Ribosomal proteins 50S L24/mitochondrial 39S L24 50S ribosomal protein L24 [rplX] MITOCHONDRIAL RIBOSOMAL PROTEIN L24	IPR003256	3	2	1	3	1	1	2	2	1	2	3	1	1	1	2	1	2	2	2	1	1	2	1	2
OXIDOREDUCTASE-RELATED Malate/L-lactate dehydrogenase	IPR003767	5	3	2	5	2	0	0	2	1	3	3	1	1	3	1	1	1	0	0	1	1	1	1	2
Zc3h12a-like Ribonuclease NYN domain	IPR021869	3	4	1	3	2	0	0	1	0	2	1	1	4	2	2	1	2	1	4	1	1	1	1	2
Transcription factor TFIIB repeat	IPR013150	1	1	1	1	1	2	2	1	2	1	2	2	3	4	2	2	3	2	1	1	2	0	1	2
tRNA intron endonuclease, catalytic C-terminal domain	IPR006677	2	2	4	2	1	0	2	2	0	2	2	2	2	1	2	1	2	0	0	2	2	3	1	3
SECY/SEC61-ALPHA FAMILY MEMBER SecY translocase	IPR002208	2	1	2	1	1	2	3	1	3	1	1	2	1	2	3	1	3	1	1	1	1	2	2	2
ADP,ATP CARRIER PROTEIN 1-RELATED-RELATED	IPR002113	1	2	2	1	1	1	3	1	3	2	2	2	1	3	1	1	1	1	1	2	1	2	2	2
Domain of unknown function (DUF4200)	IPR025252	3	3	2	3	1	2	2	3	1	2	2	0	0	3	2	0	2	2	3	0	0	0	2	3
Integral membrane protein EMC3/TMCO1-like	IPR002809	2	2	2	2	1	2	2	2	2	2	1	2	2	1	1	2	1	1	1	2	2	1	1	2
B12-binding domain	IPR006158	1	2	1	3	1	3	1	3	0	1	3	1	2	2	1	2	1	0	2	2	3	2	2	0
Ribosomal protein S13/S18 Ribosomal protein S13 family	IPR001892	2	2	1	1	1	2	3	2	2	1	3	2	2	3	2	1	2	2	1	1	2	0	1	1
RE74312P	IPR006687	3	2	2	2	1	1	1	2	1	2	3	2	1	2	1	1	1	1	1	2	1	2	2	1
Josephin domain Josephin	IPR006155	3	3	5	1	0	2	2	2	0	3	4	0	3	1	1	2	1	1	1	2	0	0	2	1
Cytochrome c oxidase biogenesis protein Cmc1 like COX ASSEMBLY MITOCHONDRIAL PROTEIN	IPR013892	1	2	1	2	1	2	3	0	2	1	1	1	2	2	2	2	2	2	2	2	2	2	1	1
TRANSLATIONAL ACTIVATOR GCN1-RELATED	IPR033173	0	1	2	0	4	2	2	3	1	2	3	1	1	4	1	1	1	2	1	2	1	1	2	1
Semialdehyde dehydrogenase, dimerisation domain	IPR012280	3	1	0	1	2	2	2	1	2	2	1	2	2	2	2	3	2	2	1	1	2	1	1	2
GidA associated domain	IPR026904	3	2	2	2	1	2	1	2	2	1	2	1	2	1	2	1	2	3	1	1	2	1	1	1
Xylose isomerase-like TIM barrel	IPR013022	4	2	3	1	1	1	1	2	3	4	5	2	0	0	2	0	0	3	3	1	1	1	0	0
Beta2-adaptin appendage, C-terminal sub-domain	IPR015151	4	3	2	1	0	0	2	3	1	2	2	1	1	1	2	1	1	2	2	2	0	1	3	2
F-BOX ONLY PROTEIN	IPR029799	7	5	5	4	0	0	0	4	0	0	6	0	0	8	1	0	0	1	0	0	0	0	0	0
Plus-3 domain Plus3 domain	IPR004343	3	2	4	2	2	1	1	3	1	1	4	1	1	1	2	1	1	2	1	1	1	2	1	1
UNCHARACTERIZED	IPR038791	4	5	3	3	2	0	2	5	0	3	0	0	0	2	1	0	0	4	1	0	0	1	0	5
UNCHARACTERIZED	IPR039860	3	1	0	1	0	1	1	0	1	7	6	0	2	1	0	2	1	1	1	6	0	1	1	4
UNCHARACTERIZED	IPR039044	4	3	4	3	0	1	0	4	1	1	6	0	1	2	1	1	1	2	1	1	0	1	1	1
CCR4-NOT TRANSCRIPTION COMPLEX	IPR040398	1	1	2	0	1	1	1	1	1	2	3	1	12	1	1	1	1	1	1	1	1	1	1	1
Omp85 superfamily domain	IPR000184	2	1	3	0	1	2	3	2	3	1	0	2	2	2	3	1	3	2	1	1	2	0	1	2
PROTEIN TIC 20-II, CHLOROPLASTIC	IPR005691	2	2	1	0	0	2	3	0	2	0	4	2	1	2	3	1	3	1	1	2	2	3	1	2
Intramolecular chaperone auto-processing (ICA) domain Chaperone of endosialidase	IPR030392	3	8	0	0	0	1	0	0	0	5	0	0	0	2	3	0	0	1	2	0	0	1	1	14
ALR/ERV	IPR039799	2	2	2	2	4	1	2	1	1	1	1	1	1	2	2	2	2	3	1	1	2	1	1	2
PROTEIN PROTON GRADIENT REGULATION 5, CHLOROPLASTIC	IPR037497	4	2	0	2	1	1	1	2	1	1	5	1	1	2	1	1	1	2	1	2	1	2	3	1
Protein of unknown function (DUF5672)	IPR043729	7	7	4	7	0	1	0	4	0	0	4	0	0	2	2	0	0	0	2	0	0	0	0	0
Poly A polymerase head domain	IPR002646	1	3	1	1	1	2	2	2	1	2	1	1	2	0	2	2	2	2	2	2	1	0	2	4
Ubiquitin fold domain	IPR018965	4	3	2	2	1	0	1	2	1	1	4	1	1	2	2	2	1	0	1	2	1	2	1	2
AIR synthase related protein, N-terminal domain	IPR016188	1	2	3	0	2	2	1	1	2	3	3	3	1	1	1	1	1	1	2	2	1	2	1	2
Dehydratase family	IPR000581	3	2	2	2	2	1	1	2	1	1	5	1	1	2	1	2	1	1	1	1	1	2	1	2
AAA domain	IPR038729	1	1	1	2	1	2	1	1	2	1	3	1	2	6	2	1	0	3	1	1	2	2	1	3
B domain of TMEM189, localisation domain	IPR019547	1	3	4	1	4	1	1	2	1	1	3	3	1	1	2	3	1	1	0	1	1	1	1	1
Ribosomal protein L14p/L23e 50S/60S RIBOSOMAL PROTEIN L14/L23 50S ribosomal protein L14 [rplN]	IPR000218	3	2	0	2	1	2	2	2	2	1	3	2	2	2	1	1	1	1	1	1	2	2	1	2
Programmed cell death protein 2, C-terminal putative domain	IPR007320	0	2	2	2	0	2	1	2	1	2	2	2	2	1	2	2	2	1	1	2	2	2	2	2
DNA-DIRECTED PRIMASE / POLYMERASE PROTEIN	IPR044917	2	3	2	1	2	2	1	2	2	1	4	1	1	3	1	1	1	1	2	1	1	3	2	1
ATP-BINDING TRANSPORT PROTEIN-RELATED	IPR015688	3	2	1	2	5	1	2	3	1	2	3	0	1	5	1	2	1	0	2	1	0	1	1	0
Protein tyrosine phosphatase-like protein, PTPLA PTPLA DOMAIN PROTEIN	IPR007482	1	3	3	2	1	2	2	3	1	2	1	1	2	1	2	1	3	1	1	1	2	0	2	1
NIPPED-B-LIKE PROTEIN DELANGIN SCC2-RELATED	IPR033031	0	1	3	1	1	1	12	2	1	3	0	0	1	2	1	2	1	0	1	1	1	2	2	1
Molybdopterin-binding domain of aldehyde dehydrogenase	IPR008274	0	3	1	0	2	2	1	2	3	2	7	1	1	1	0	2	0	1	2	1	1	1	1	5
Protein of unknown function (DUF1517)	IPR010903	1	2	2	1	0	1	5	2	1	2	1	2	2	3	1	1	1	1	1	3	1	2	2	0
Calcium-activated SK potassium channel	IPR015449	3	4	3	1	1	0	0	1	0	1	0	0	0	26	0	0	0	0	1	0	0	0	0	0
Shikimate kinase	IPR031322	2	1	1	1	1	1	2	2	2	2	2	3	1	3	3	1	2	0	2	1	1	2	1	3
PGAP1-like protein	IPR012908	2	2	3	2	2	1	0	1	0	3	1	0	0	3	1	1	1	2	2	2	0	3	3	3
AAA domain	IPR025669	3	2	3	5	0	2	0	1	0	3	5	1	0	4	0	1	0	9	0	0	0	0	1	0
NMT1/THI5 like	IPR015168	3	2	4	2	3	1	1	0	1	3	6	0	1	5	1	0	0	2	0	1	0	0	1	2
LIPIN	IPR026058	1	2	5	1	1	0	1	2	0	3	5	1	1	8	1	1	1	1	1	1	1	0	1	1
PEPTIDASE M20 FAMILY MEMBER	IPR017439	2	2	4	2	4	2	2	1	2	3	2	0	2	1	2	0	1	1	1	1	0	1	1	2
Possible lysine decarboxylase	IPR031100	4	2	1	1	1	2	2	1	2	1	5	1	1	1	3	2	2	3	1	1	1	0	1	1
Ribulose-phosphate 3-epimerase [rpe]	IPR026019	2	2	0	1	3	2	2	1	1	1	3	1	2	2	2	2	2	2	0	2	3	1	2	1
Elongation factor G [fusA]	IPR004540	2	1	0	0	2	2	1	2	2	2	2	2	2	1	2	2	2	1	2	2	2	2	1	2
Glycosyl hydrolases family 32 N-terminal domain	IPR013148	3	7	5	3	6	3	4	3	3	1	1	0	0	0	0	0	0	0	1	0	0	1	0	0
Ribose 5-phosphate isomerase A (phosphoriboisomerase A)	IPR004788	2	3	0	1	2	2	2	2	3	1	1	2	2	2	2	1	2	1	1	1	2	2	2	1
DNA LIGASE 4	IPR029710	1	3	3	1	0	5	1	2	1	2	6	1	1	1	1	1	1	0	1	2	1	1	1	3
OS-9-RELATED	IPR045149	2	3	4	3	2	1	2	1	2	1	2	1	1	2	2	1	1	1	2	1	1	1	1	1
CORE-2/I-BRANCHING BETA-1,6-N-ACETYLGLUCOSAMINYLTRANSFERASE FAMILY PROTEIN-RELATED	IPR044174	1	4	0	2	0	10	0	1	11	1	0	1	0	2	1	1	0	1	1	0	0	0	0	3
C-terminal region of peptidase_M24	IPR032416	2	1	4	2	2	1	1	1	1	1	3	3	2	0	1	2	2	1	2	1	2	1	1	2
Carbamoyl-phosphate synthase small chain, CPSase domain	IPR002474	2	2	1	2	2	1	1	2	1	1	2	2	1	2	1	2	1	2	2	2	1	2	2	1
NOG1 N-terminal helical domain	IPR041623	1	1	1	1	1	2	1	2	2	2	1	1	1	2	2	3	2	1	2	2	1	3	2	1
WD REPEAT DOMAIN-CONTAINING FAMILY	IPR045151	0	1	1	0	0	3	3	1	3	2	1	3	1	3	1	2	2	2	1	1	2	1	1	4
POLY ADP-RIBOSE GLYCOHYDROLASE Poly (ADP-ribose) glycohydrolase (PARG)	IPR007724	1	4	3	5	0	0	0	3	0	8	1	0	0	2	0	0	0	0	0	0	0	0	0	13
MutL C terminal dimerisation domain	IPR014790	1	1	1	2	3	1	2	1	1	1	1	3	3	1	1	2	1	2	1	1	3	2	2	2
Nucleoporin FG repeat region	IPR025574	1	5	2	5	0	0	1	3	0	5	2	0	0	1	0	0	2	3	0	2	0	2	2	2
GLUCOSE INHIBITED DIVISION PROTEIN A	IPR004416	3	2	2	2	1	2	1	2	2	1	2	1	2	1	2	1	2	2	1	1	2	1	1	1
Ubiquitin-activating enzyme E1 FCCH domain	IPR032418	3	2	5	3	1	1	1	2	1	1	4	1	1	3	1	1	1	0	1	1	1	1	2	1
Fe-S metabolism associated domain	IPR003808	1	2	1	2	1	2	1	2	2	2	1	2	2	2	2	2	1	2	0	2	2	2	1	2
REGULATORY-ASSOCIATED PROTEIN OF MTOR	IPR004083	2	3	4	1	2	1	1	2	1	1	2	4	1	1	1	1	1	2	1	2	1	1	1	2
40S RIBOSOMAL PROTEIN S14/30S RIBOSOMAL PROTEIN S11 30S ribosomal protein S11 [rpsK] Ribosomal protein S11	IPR001971	2	2	2	2	1	1	1	2	3	2	2	3	1	2	1	1	1	2	1	1	1	1	1	2
tRNA(Ile)-lysidine synthase [tilS] TRNA(ILE)-LYSIDINE SYNTHASE-RELATED	IPR012094	2	2	3	1	2	1	1	2	0	1	2	0	1	2	2	2	1	2	3	1	1	2	2	1
Proteolysis_6 C-terminal	IPR044046	2	2	1	1	0	1	1	4	0	2	3	1	1	3	1	2	0	4	2	2	1	0	2	2
Enkurin domain Calmodulin-binding	IPR027012	0	3	3	3	1	1	2	2	2	2	1	0	0	6	2	2	1	2	1	0	0	2	2	2
SUN domain Sad1 / UNC-like C-terminal	IPR012919	0	1	0	1	2	1	1	1	0	2	0	2	2	2	2	2	2	1	1	4	3	2	3	2
CSL zinc finger DPH-type metal-binding (MB) domain	IPR007872	2	3	1	1	1	1	2	2	2	2	2	1	1	3	2	2	2	2	0	1	2	2	1	1
YDG domain	IPR003105	3	4	1	3	1	3	2	2	3	1	4	0	0	0	2	0	0	1	1	1	0	0	1	6
Vitamin K epoxide reductase family	IPR012932	2	2	3	0	1	1	1	2	1	1	3	1	1	2	1	1	1	2	1	1	3	1	1	5
[2Fe-2S] binding domain	IPR002888	0	3	1	0	2	2	1	2	3	2	5	1	1	1	0	2	0	1	2	1	1	1	1	5
RIBOSOMAL PROTEIN S7	IPR000235	2	2	2	2	1	2	2	1	1	1	1	4	2	2	1	1	1	3	0	1	2	2	1	1
MEVALONATE KINASE/GALACTOKINASE	IPR000705	2	2	3	0	1	1	1	1	0	2	5	1	1	3	2	2	1	2	1	2	1	2	2	1
50S ribosomal protein L4 [rplD] 50S RIBOSOMAL PROTEIN L4	IPR013005	2	2	1	3	2	2	2	2	1	1	2	2	1	2	2	1	2	2	2	1	1	1	1	1
MACROPHAGE ERYTHROBLAST ATTACHER-RELATED	IPR045098	2	2	3	2	0	2	2	2	2	3	3	3	2	3	0	2	0	2	0	0	3	0	0	2
Arginyl tRNA synthetase N terminal domain	IPR005148	2	2	3	1	2	1	1	2	1	4	2	1	1	3	1	2	1	1	2	2	1	1	1	1
Thiamine monophosphate synthase	IPR022998	2	1	0	1	0	3	1	1	2	1	1	2	2	2	2	2	2	2	2	2	2	1	2	1
TRANSLATION INITIATION FACTOR IF-3 Translation initiation factor IF-3 [infC]	IPR001288	3	1	2	1	0	2	2	2	1	2	2	1	1	2	2	3	2	2	1	2	1	0	1	2
MECHANOSENSITIVE ION CHANNEL PROTEIN 5	IPR016688	2	1	0	1	0	2	1	1	3	8	2	0	0	0	2	0	0	1	0	5	0	0	2	4
Periplasmic binding protein Iron siderophore/cobalamin periplasmic-binding domain	IPR002491	3	3	2	5	1	2	2	0	1	4	5	0	1	1	2	1	1	2	0	0	0	2	1	0
Glycosyl hydrolase family 79, N-terminal domain	IPR005199	5	12	5	3	2	0	0	3	0	0	4	0	0	1	0	1	0	0	2	0	0	0	1	1
ZINC METALLOPROTEASE EGY1	IPR044838	1	1	2	1	0	3	2	1	2	1	1	1	2	0	1	2	1	0	1	2	4	3	4	1
YrdC-like domain Telomere recombination	IPR006070	3	2	1	2	2	2	2	1	2	1	3	1	1	2	2	1	2	1	0	2	2	1	1	1
MICROTUBULE-ASSOCIATED PROTEIN RP/EB FAMILY MEMBER	IPR027328	2	3	3	2	1	1	1	2	1	2	2	1	1	5	2	1	2	1	1	1	1	1	1	1
Calcineurin-like phosphoesterase superfamily domain	IPR024654	1	2	5	1	0	2	1	3	2	1	4	2	2	2	2	1	1	1	1	1	1	1	1	1
Adenosine-deaminase (editase) domain Adenosine to inosine editase domain	IPR002466	2	2	2	2	2	1	1	2	1	3	2	0	0	2	3	0	3	2	1	2	0	2	1	1
POLYRIBONUCLEOTIDE NUCLEOTIDYLTRANSFERASE	IPR012162	0	1	1	0	1	1	0	1	1	1	1	2	6	2	2	2	2	3	2	2	2	2	2	1
FERROCHELATASE Coproporphyrin III ferrochelatase [cpfC] Ferrochelatase	IPR001015	4	2	1	0	2	1	1	2	1	3	5	1	1	2	1	1	1	1	1	1	2	1	1	2
PA14 domain	IPR011658	0	1	4	0	2	3	0	1	0	2	0	0	0	16	1	0	0	0	2	0	0	2	0	5
BLL6449 PROTEIN	IPR044053	3	9	2	0	1	0	0	1	0	3	12	0	1	0	0	0	0	0	2	1	0	3	1	0
GTP-BINDING PROTEIN HFLX	IPR016496	2	2	1	2	1	2	3	2	2	2	2	1	1	1	1	2	1	1	3	1	1	1	1	2
SPX DOMAIN-CONTAINING PROTEIN 3	IPR031142	1	2	3	1	0	2	2	3	2	0	1	3	1	3	1	0	1	3	2	1	3	1	2	0
PHOSPHATIDYLINOSITOL 4-KINASE GAMMA	IPR044571	4	3	4	2	1	1	1	2	1	1	3	1	1	2	1	2	1	1	1	1	1	1	1	1
SORTING AND ASSEMBLY MACHINERY SAMM50 PROTEIN FAMILY MEMBER	IPR039910	1	1	2	1	1	2	3	1	3	1	1	2	2	2	3	1	3	1	1	1	2	1	1	1
Proline dehydrogenase	IPR002872	4	2	3	2	2	1	2	1	1	3	3	2	1	1	0	1	1	1	1	2	1	1	1	1
Protein of unknown function (DUF4079)	IPR025067	1	1	0	1	1	2	2	2	2	3	2	2	2	2	1	2	1	1	1	2	2	1	2	2
Ubiquitin-activating enzyme E1 four-helix bundle	IPR032420	2	2	3	1	2	1	1	2	1	1	3	1	1	3	1	2	1	1	2	1	1	1	2	2
ALCOHOL DEHYDROGENASE	IPR039697	3	2	1	2	1	1	3	0	0	5	4	1	1	2	2	3	1	0	0	1	1	1	1	3
SEP domain SEP domain	IPR012989	1	1	2	2	2	0	2	2	1	2	4	1	1	3	2	1	1	2	2	1	1	1	1	2
PHOSPHATIDYLETHANOLAMINE N-METHYLTRANSFERASE	IPR024960	4	2	1	4	1	1	0	3	1	2	2	2	2	2	1	1	1	2	2	1	2	1	1	0
SERINE/THREONINE-PROTEIN KINASE STN8, CHLOROPLASTIC-RELATED	IPR044803	1	1	1	2	0	3	3	1	3	0	2	0	1	4	6	0	6	0	1	0	3	1	0	0
DUSP domain DUSP domain	IPR006615	2	3	0	0	4	2	1	3	0	4	0	2	0	0	0	2	0	0	6	3	0	1	2	4
SPLICING FACTOR U2AF-ASSOCIATED PROTEIN 2	IPR034393	1	3	3	3	0	1	1	2	1	1	4	1	1	1	1	2	1	3	3	1	1	1	1	1
Type IIB DNA topoisomerase	IPR013049	0	2	2	1	1	2	1	2	1	0	2	1	2	3	2	2	1	1	1	2	2	2	2	2
Aminopeptidase P, N-terminal domain	IPR007865	3	0	4	3	3	2	3	2	2	2	1	1	1	2	1	1	1	1	1	1	2	0	1	0
U1 zinc finger	IPR013085	1	2	2	1	0	2	1	1	2	2	2	1	2	2	1	2	0	2	1	2	1	3	2	2
S-adenosylmethionine synthase [metK] S-ADENOSYLMETHIONINE SYNTHETASE	IPR002133	2	2	0	2	6	1	1	1	1	1	2	3	1	1	1	1	2	1	0	1	1	1	2	3
VACUOLAR PROTEIN SORTING VPS41	IPR045111	2	1	2	1	1	2	2	2	2	2	3	1	1	2	1	2	2	1	0	2	1	0	2	2
PDDEXK-like family of unknown function OS03G0796600 PROTEIN	IPR006502	0	0	0	0	0	8	26	0	3	0	0	0	0	0	1	0	1	0	0	0	0	0	0	0
THIOSULFATE SULFERTANSFERASE	IPR045078	2	1	3	1	1	2	2	2	1	1	3	1	2	2	1	0	1	1	1	3	1	2	2	1
NOP14 Nop14-like family	IPR007276	3	2	5	1	0	2	1	3	1	1	1	1	7	1	1	1	1	1	0	1	1	1	1	1
Acyl-CoA oxidase	IPR002655	2	2	1	2	0	4	4	0	4	1	0	3	2	0	1	3	1	0	0	1	3	1	1	2
Autophagocytosis associated protein, active-site domain UBIQUITIN-LIKE-CONJUGATING ENZYME ATG3	IPR007135	3	2	2	2	1	2	2	3	1	1	3	0	0	2	2	2	1	2	1	2	0	0	1	1
[truncated: 6,784 more rows]
